# Supplementary material
Source: PubMed Central journal article supplement (PMC6035092)

Sample 25

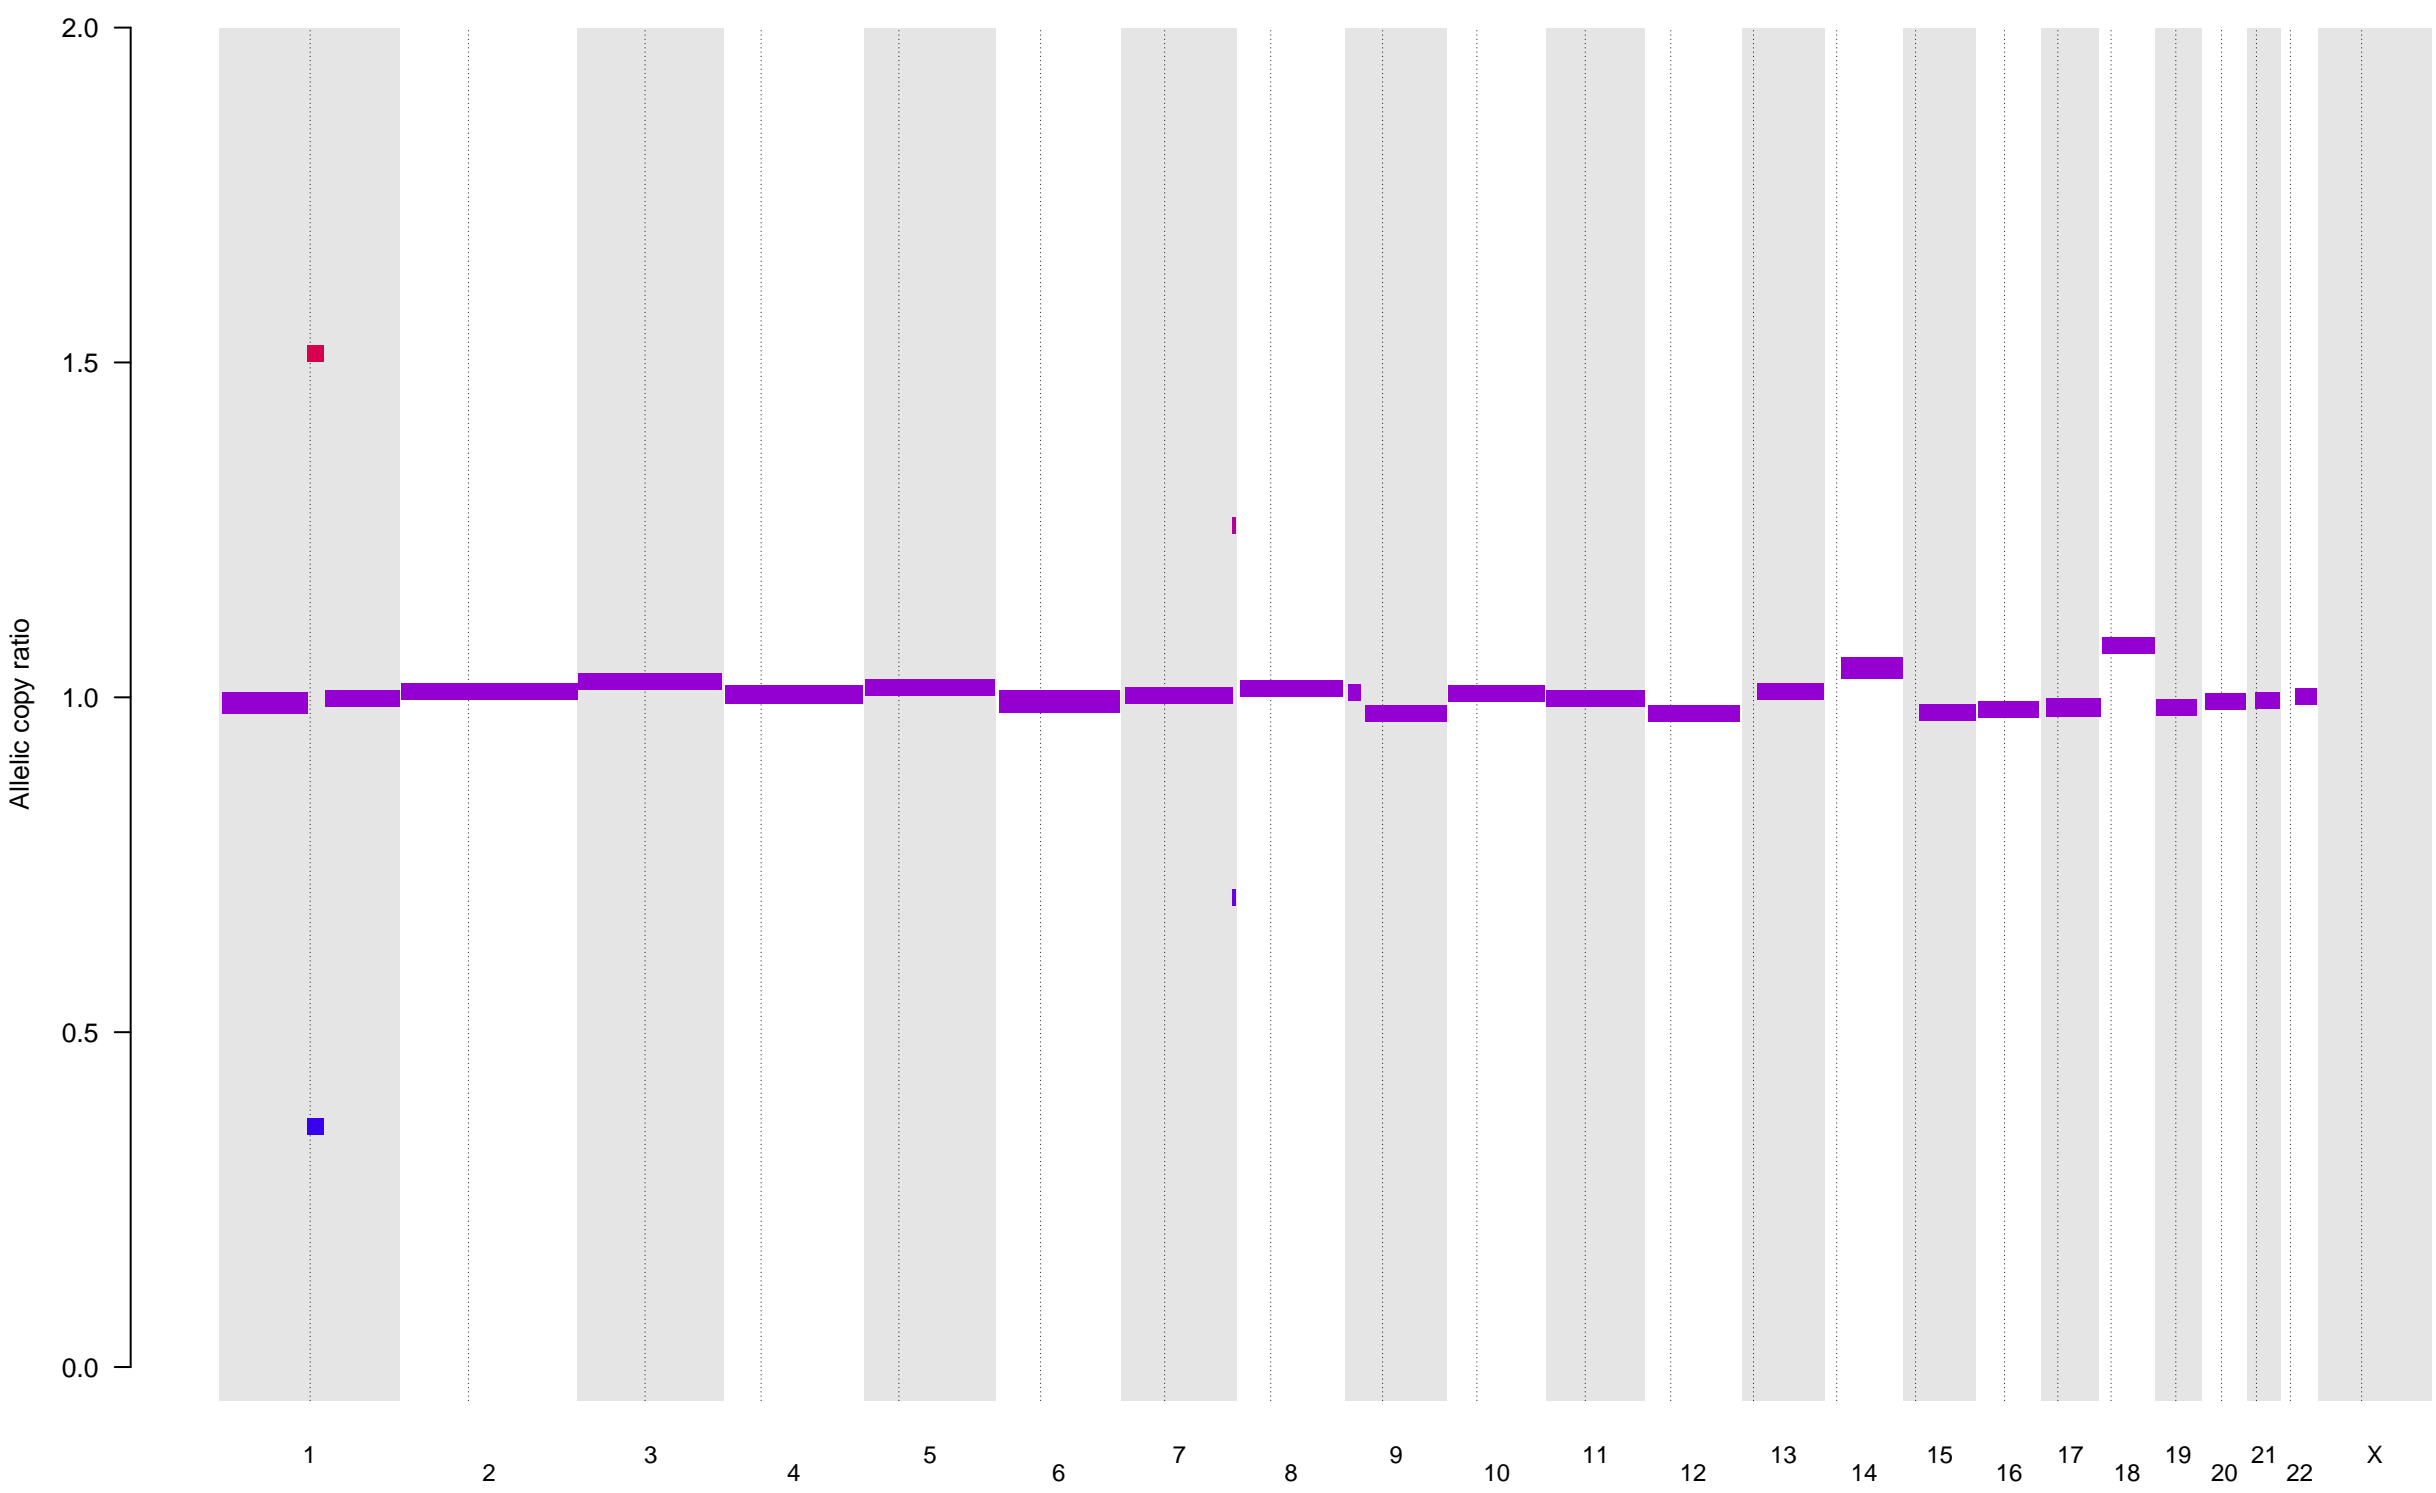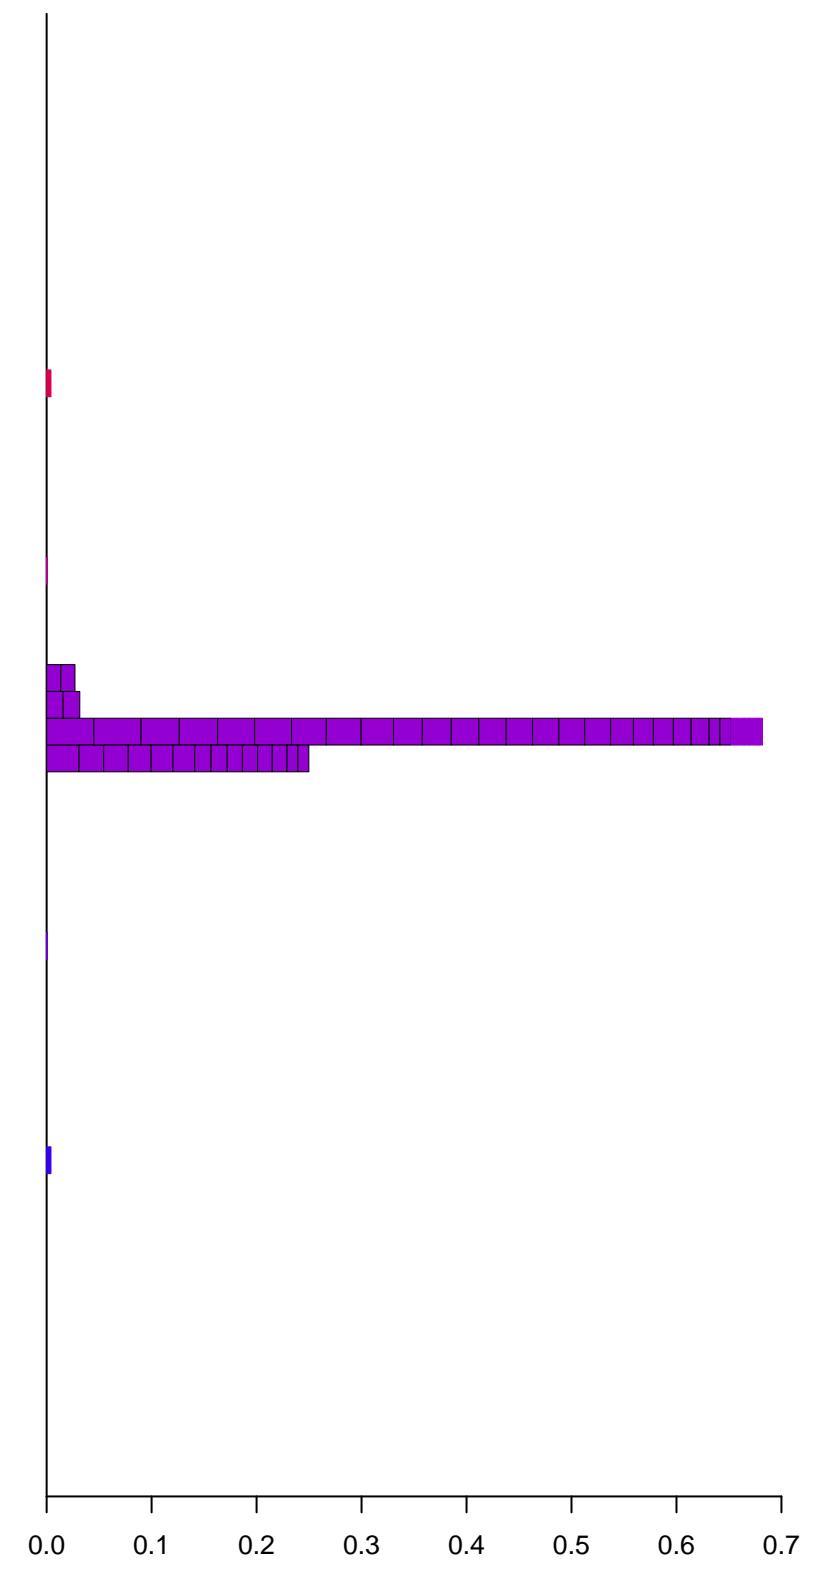

purity( $\hat{\alpha}$ ) = 0.3, ploidy:  $\hat{t} = 1.99$ ,  $\hat{t}_g = 2.01$   
 $\hat{\theta}_z = 0$ ,  $\hat{\theta}_0 = 1.2$ , WGD=0  
SCNA LL = -134.92, SSNV LL = -2753.49, SCNA Ev = -29.60161

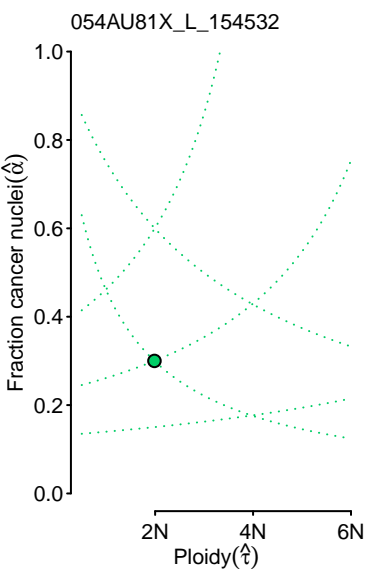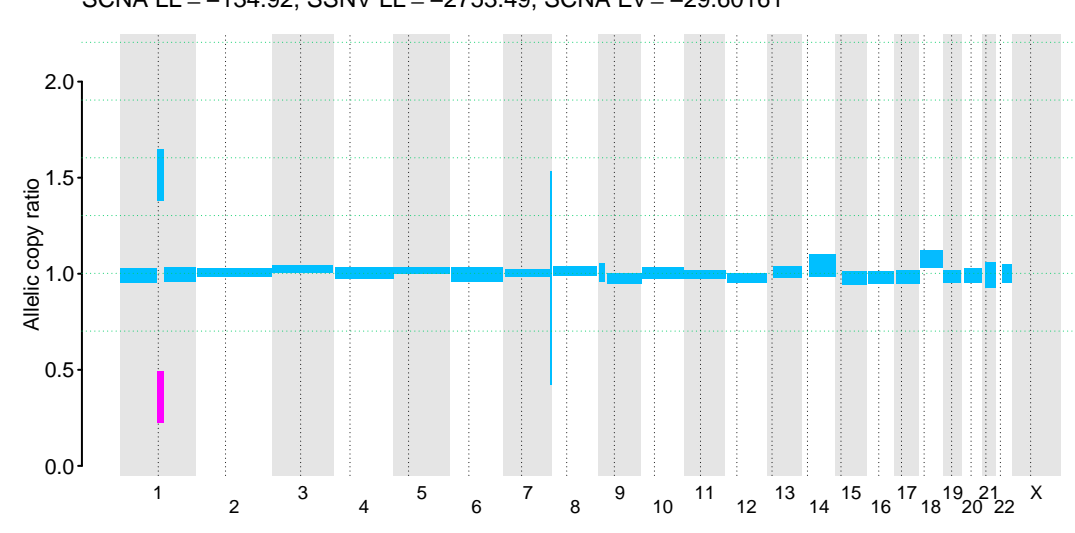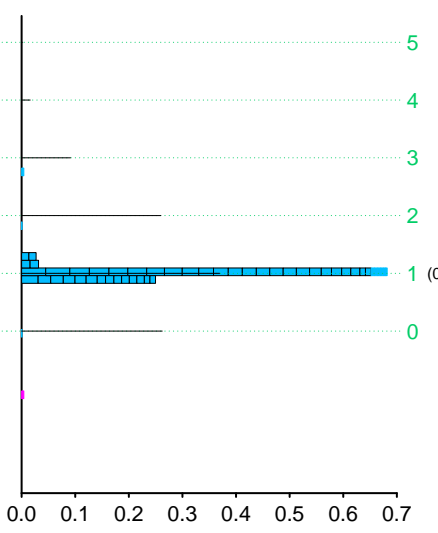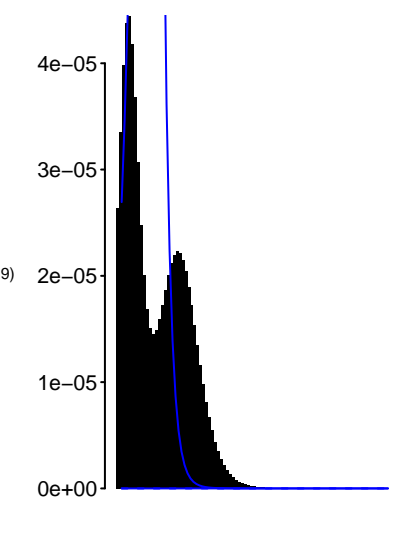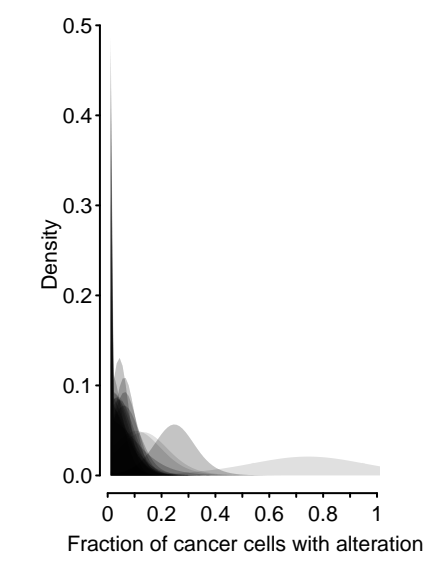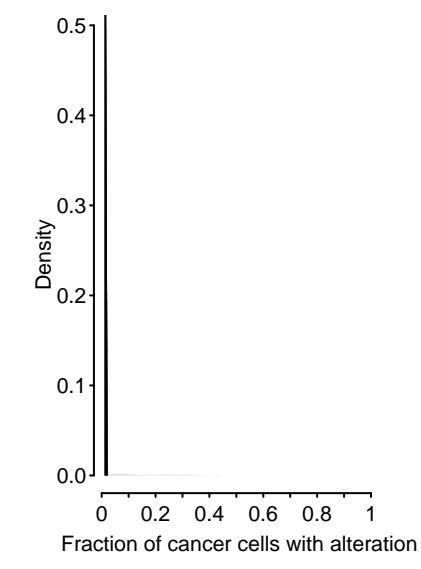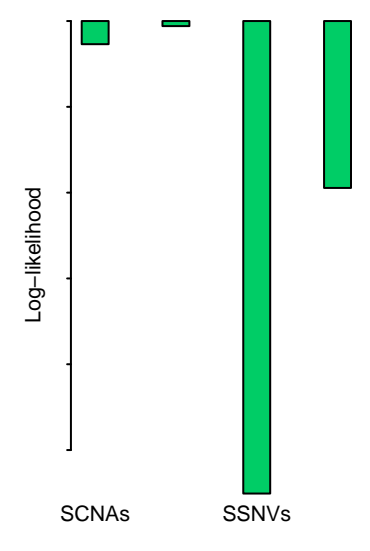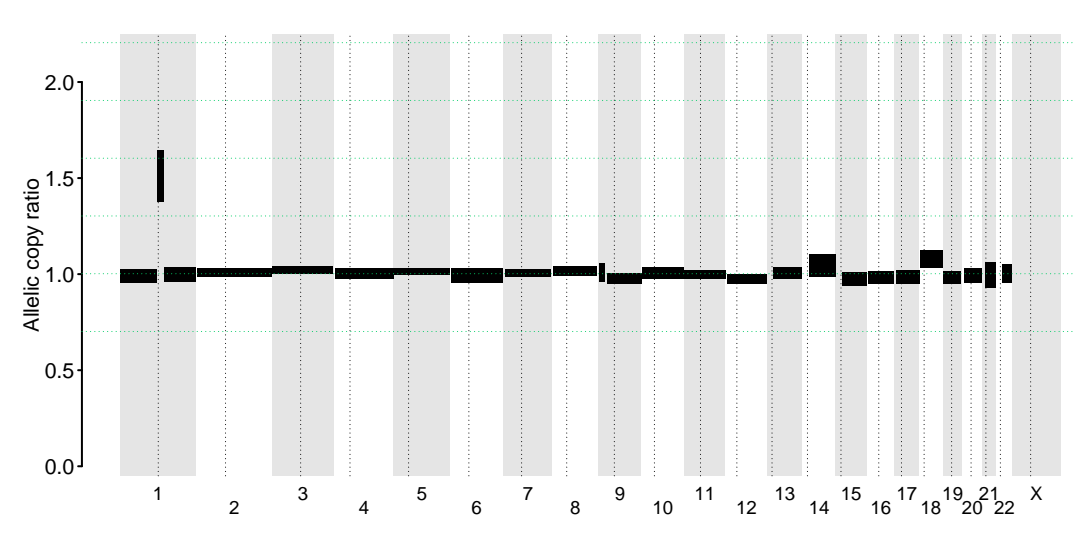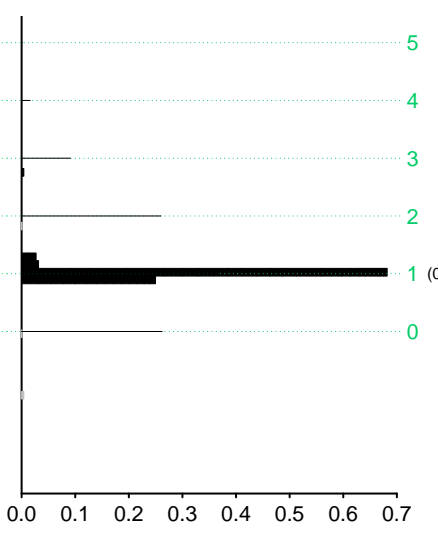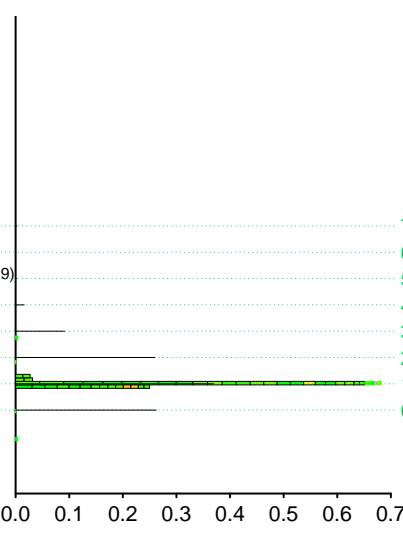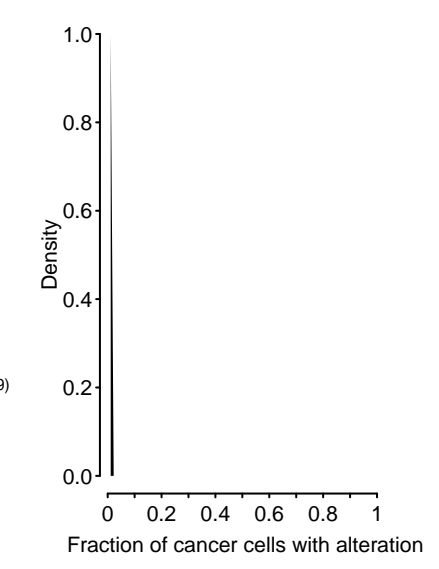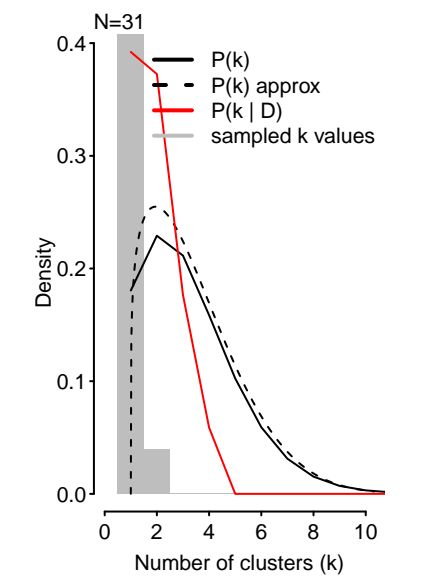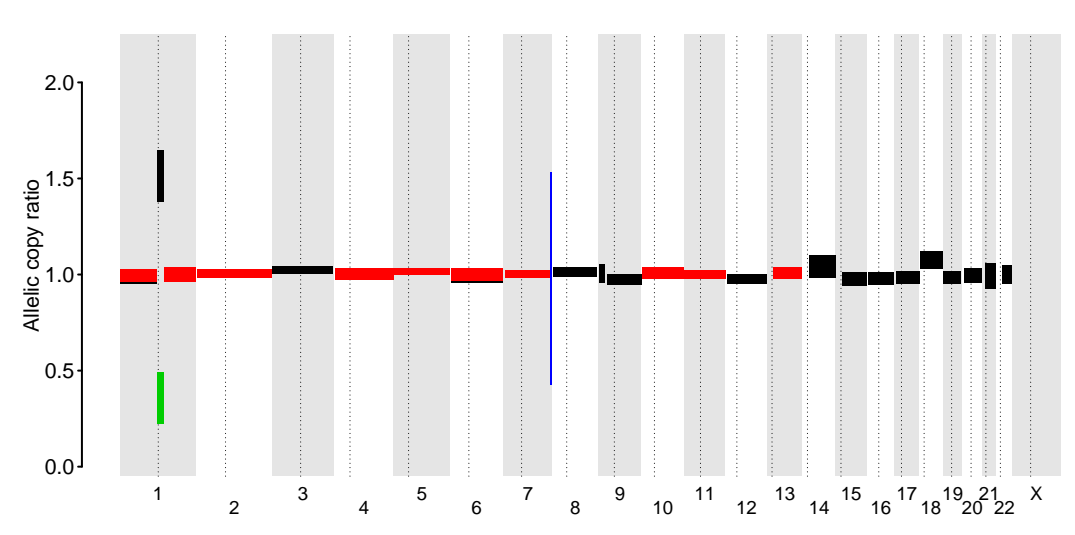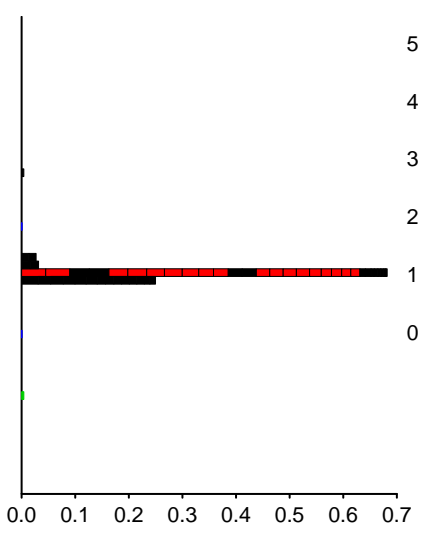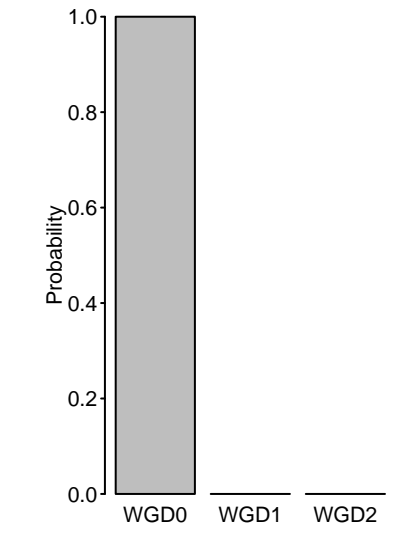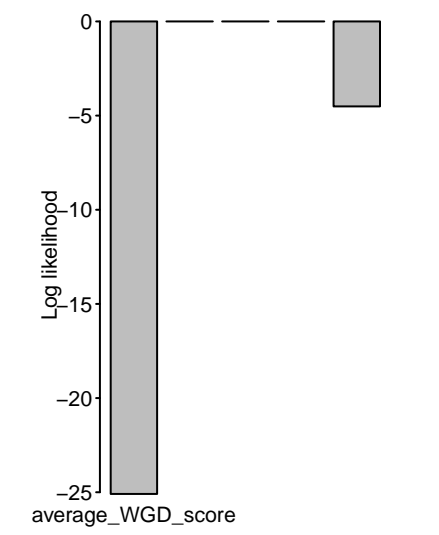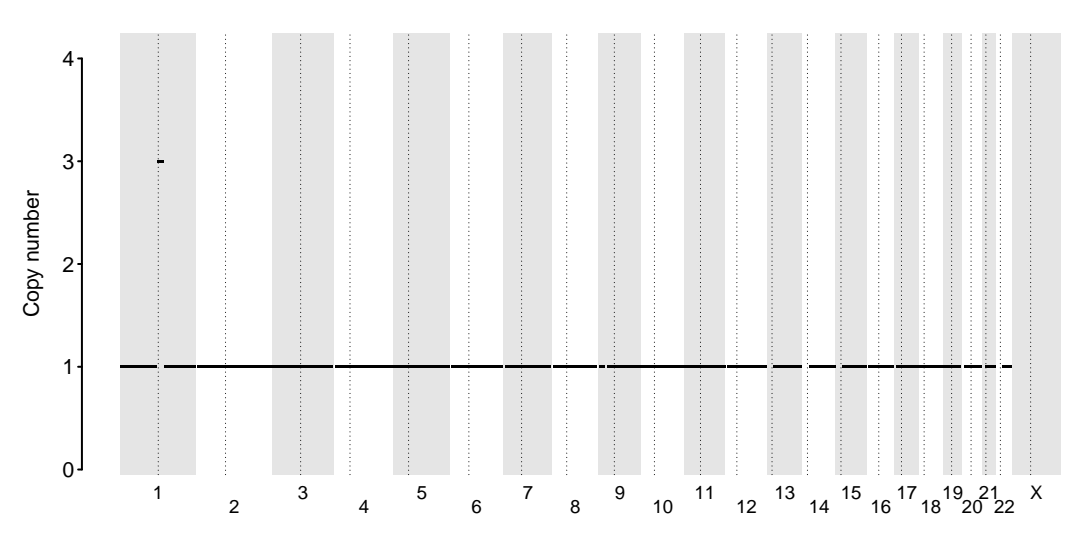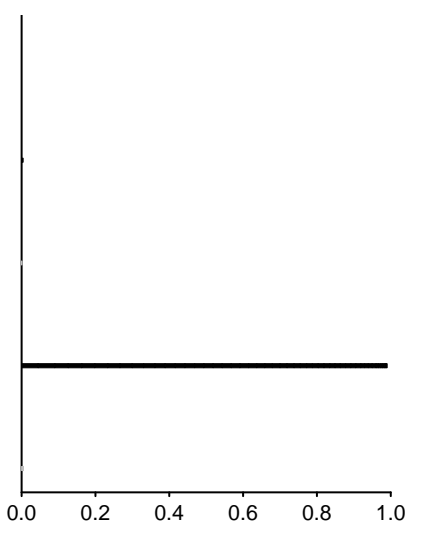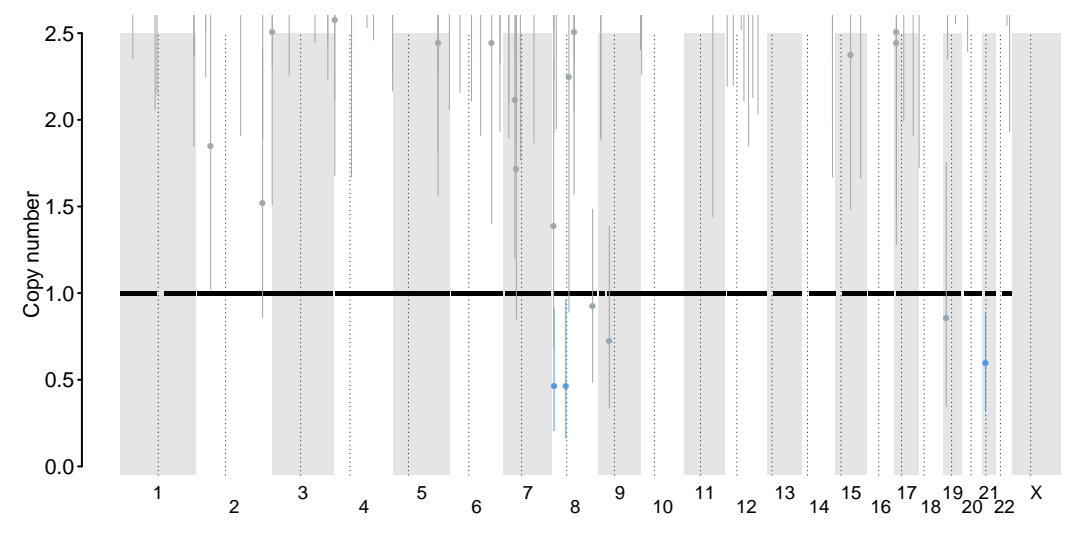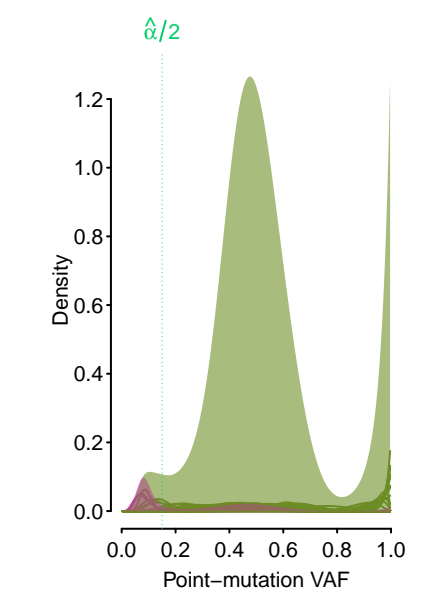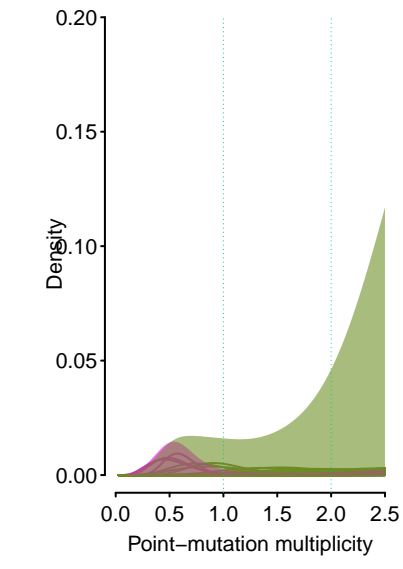

Sample 26

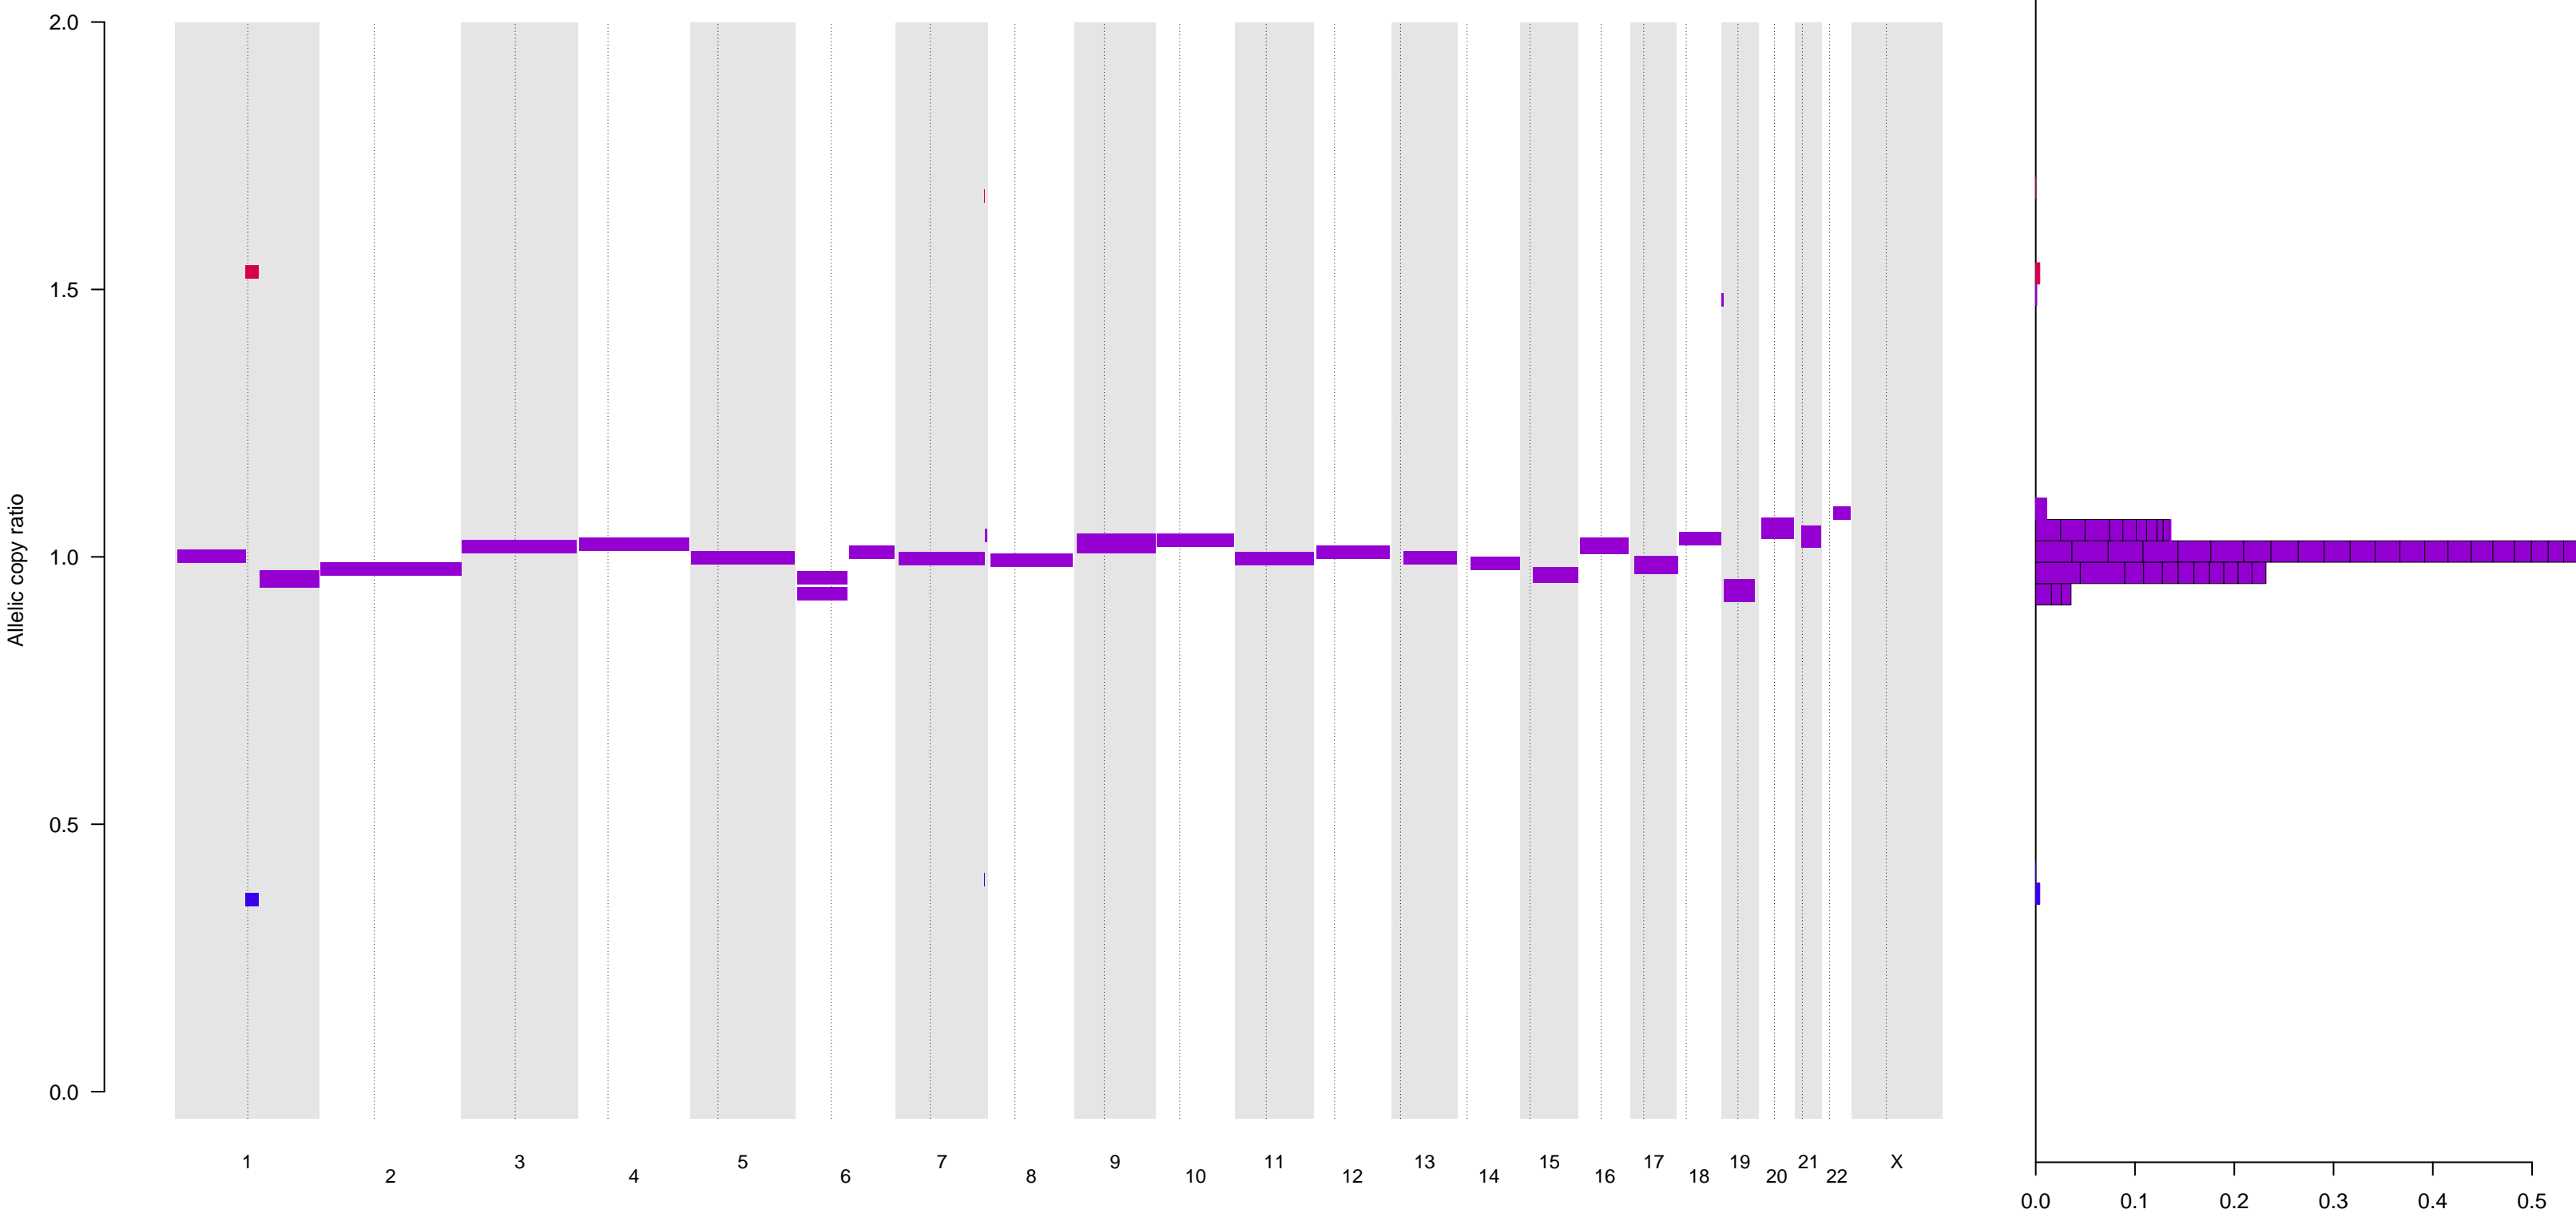

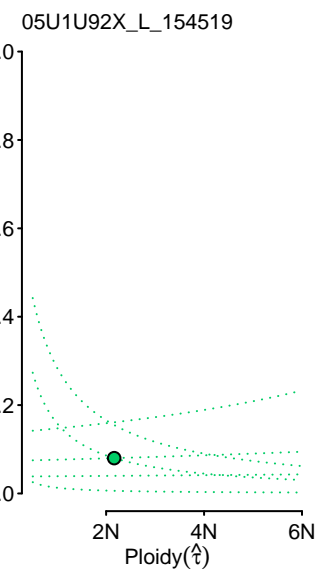

purity( $\hat{\alpha}$ ) = 0.08, ploidy:  $\hat{\tau} = 2.16$ ,  $\hat{\tau}_g = 2.1$   
 $\theta_z = 0.02$ ,  $\theta_G = 1.179$ , WGD=0  
 SCNA LL = -224.86, SSNV LL = -13754.3, SCNA Ev = -60.13245

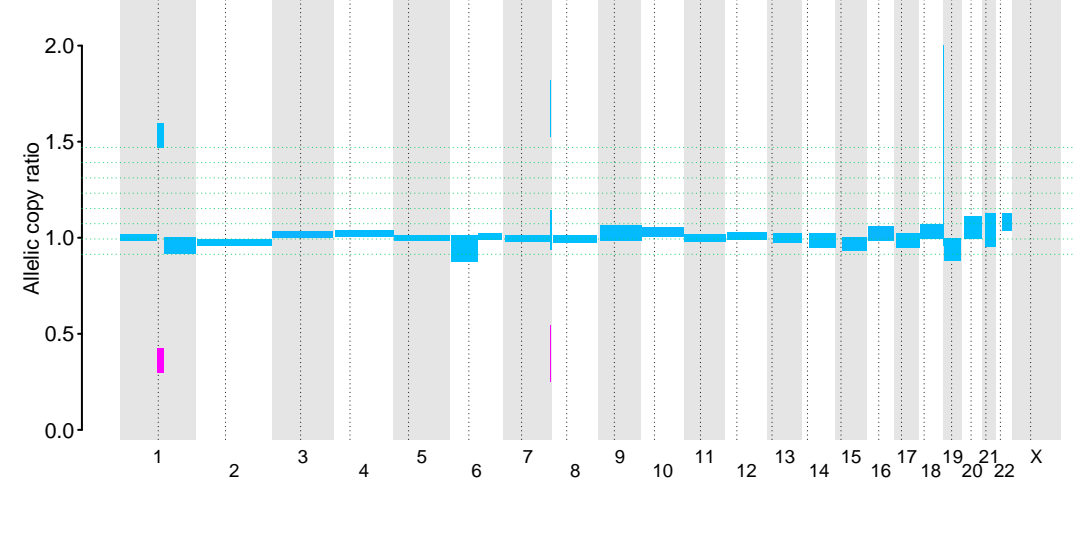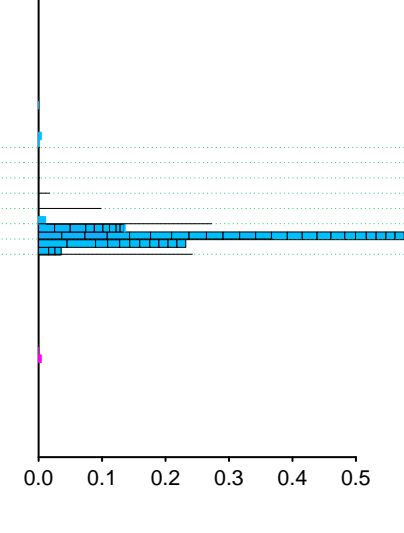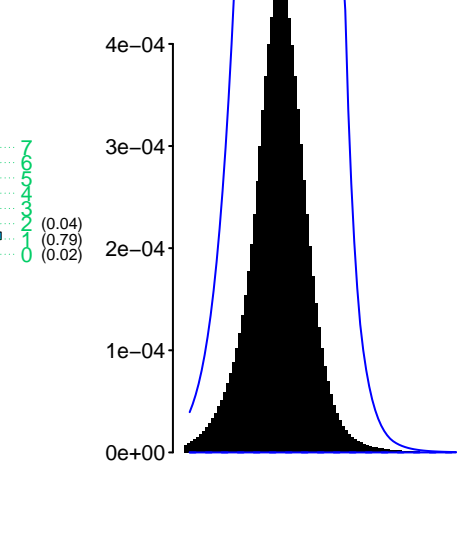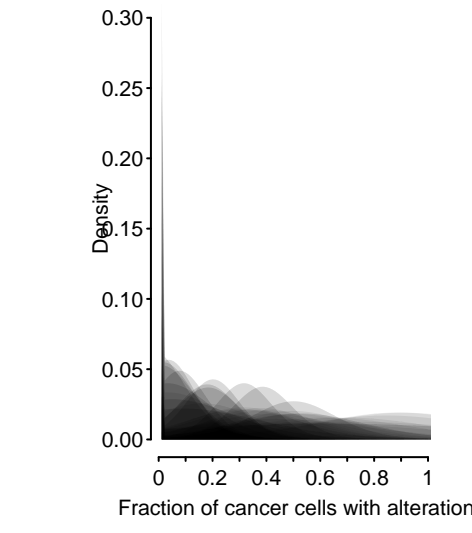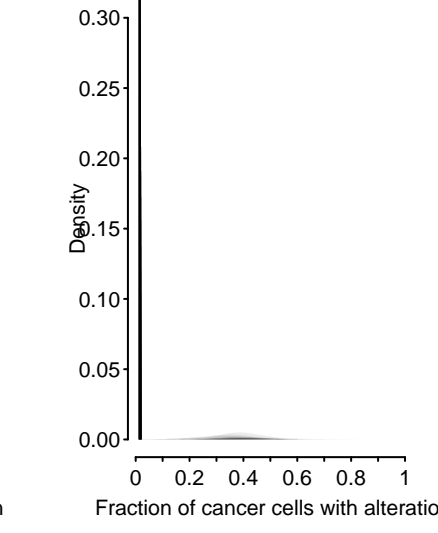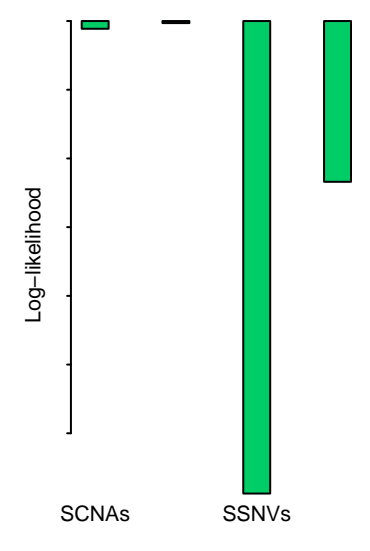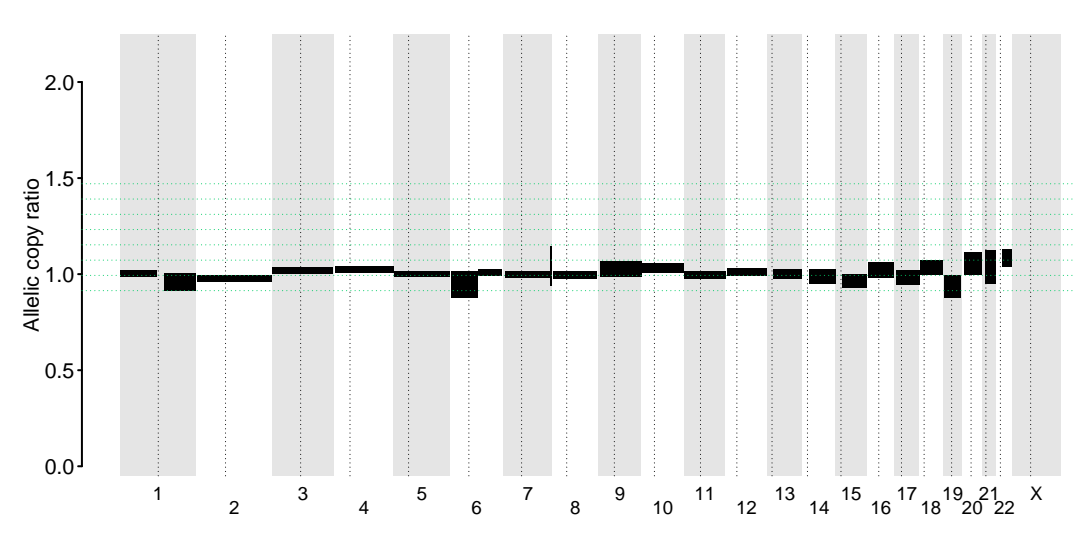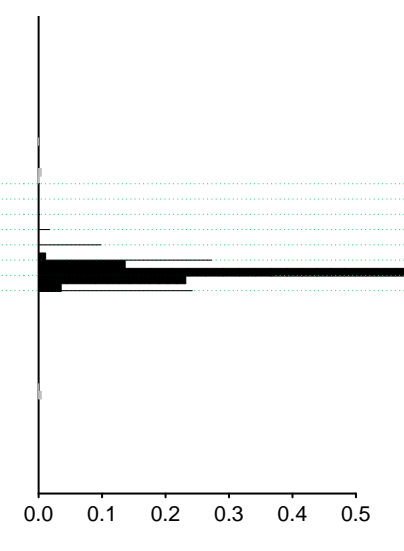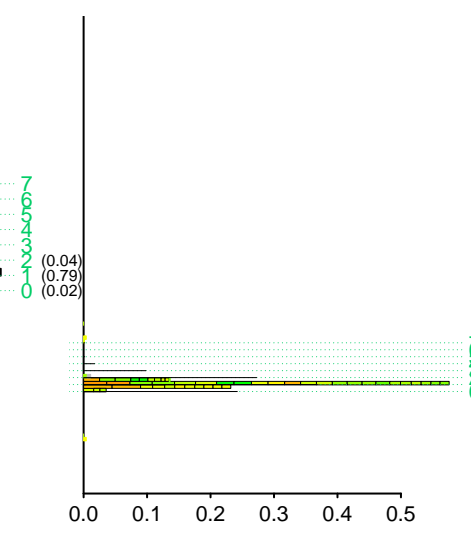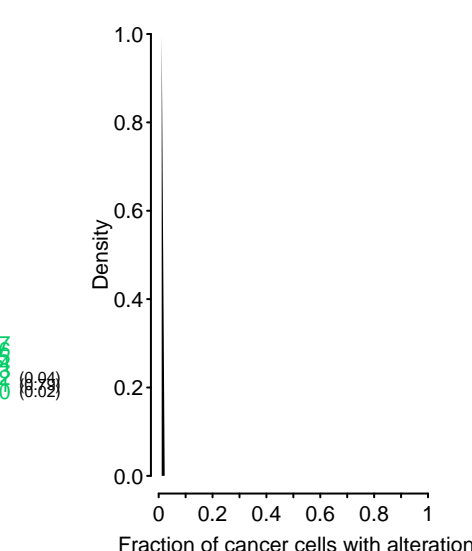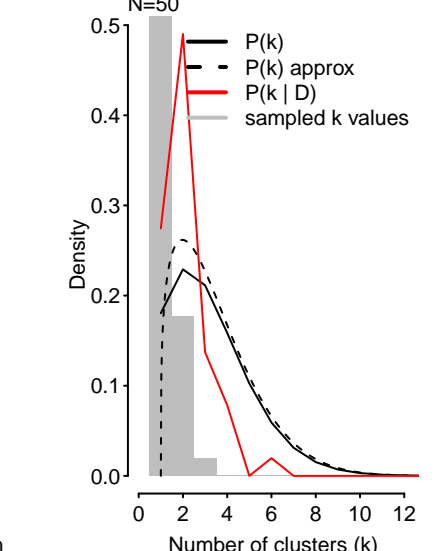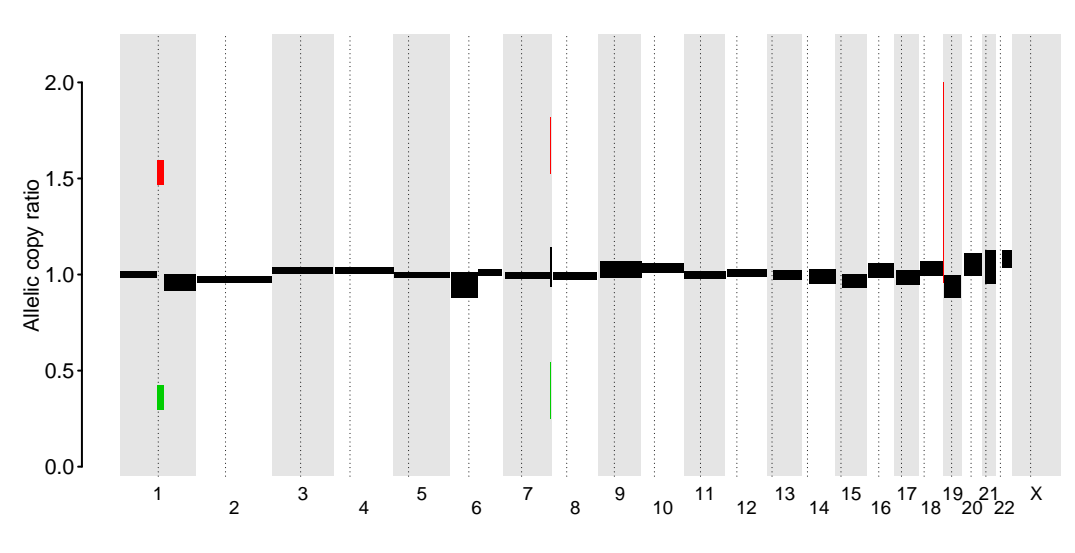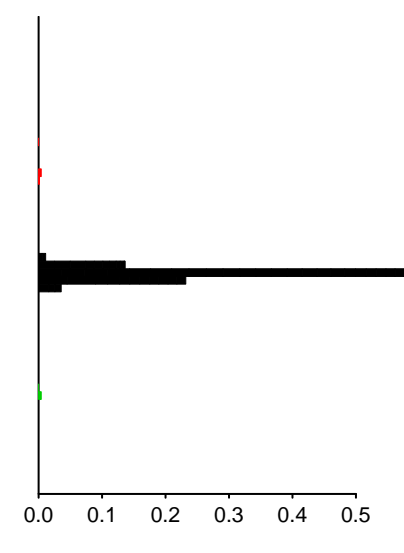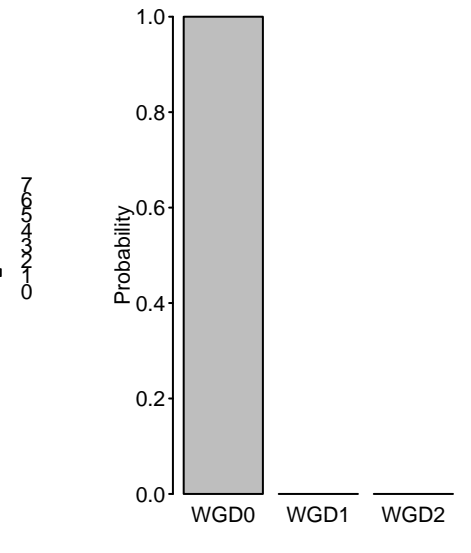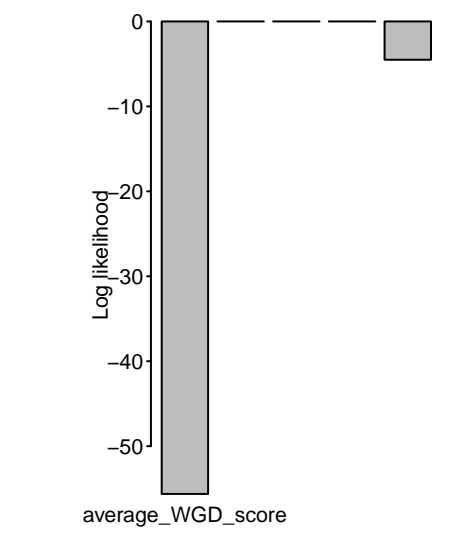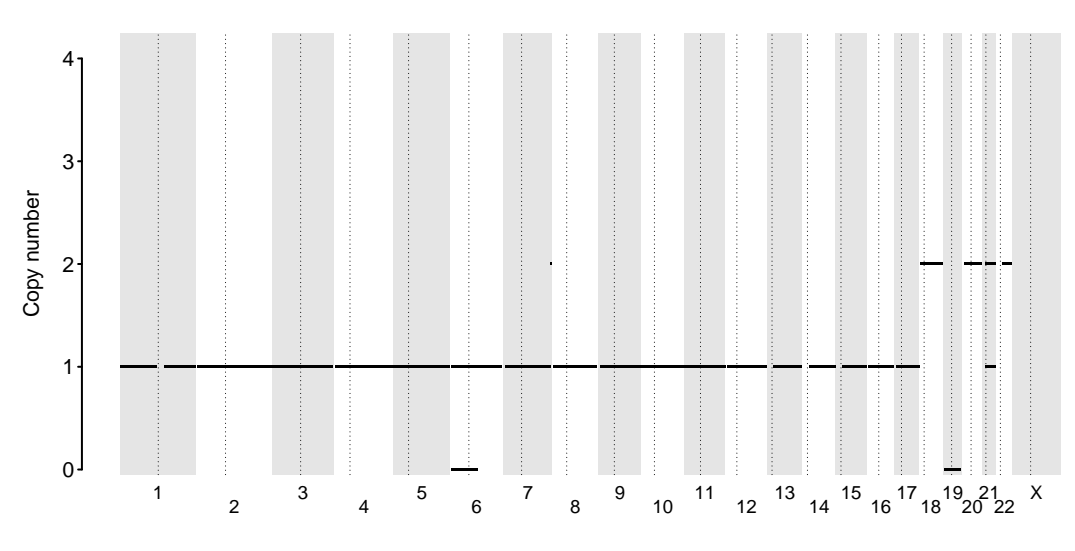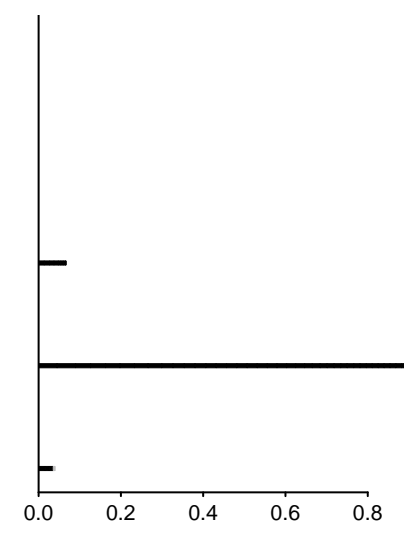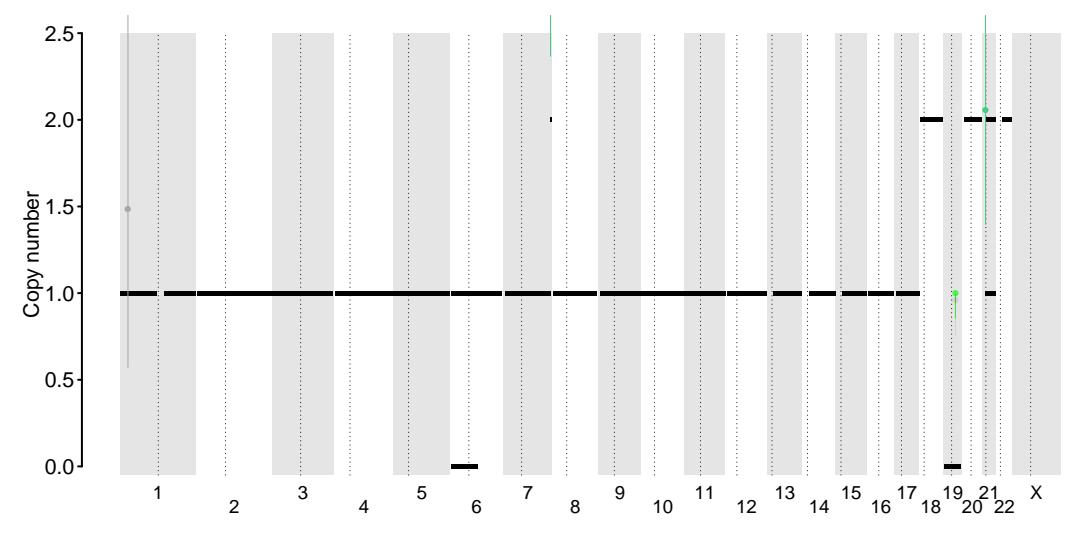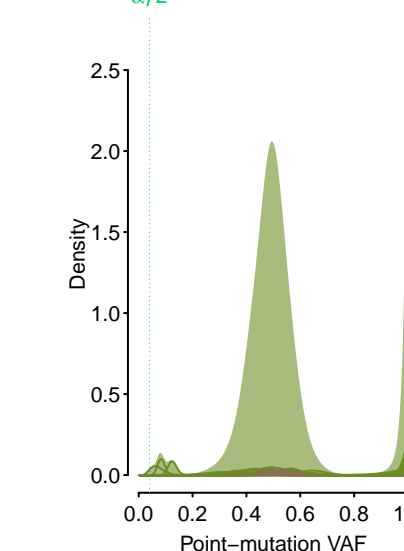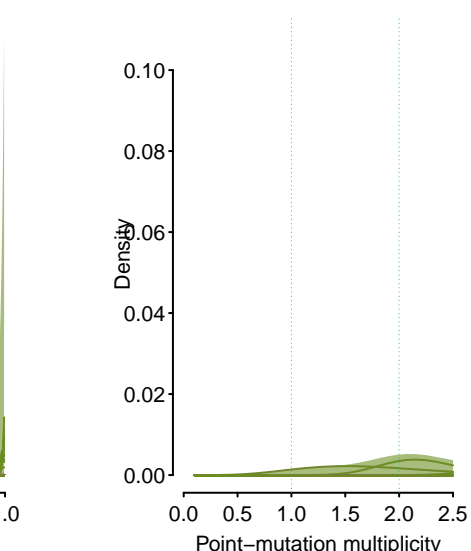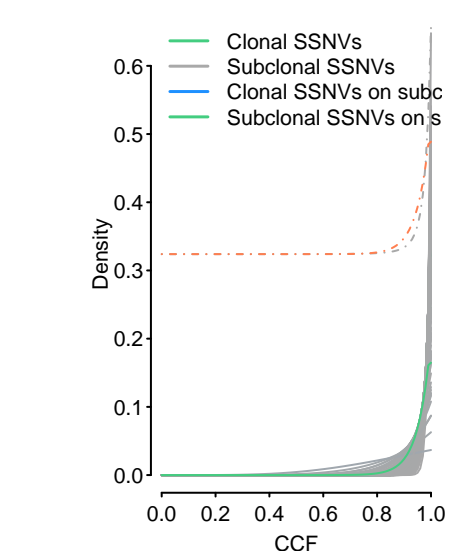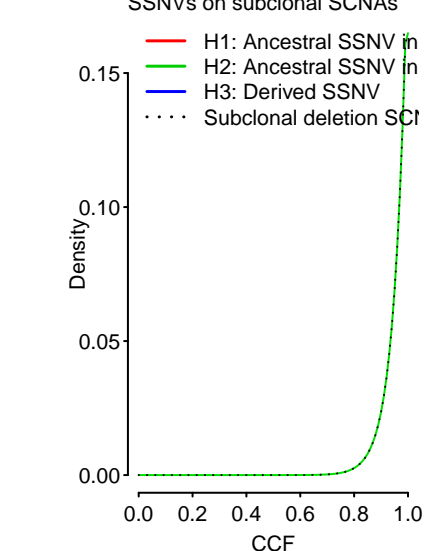



Sample 27

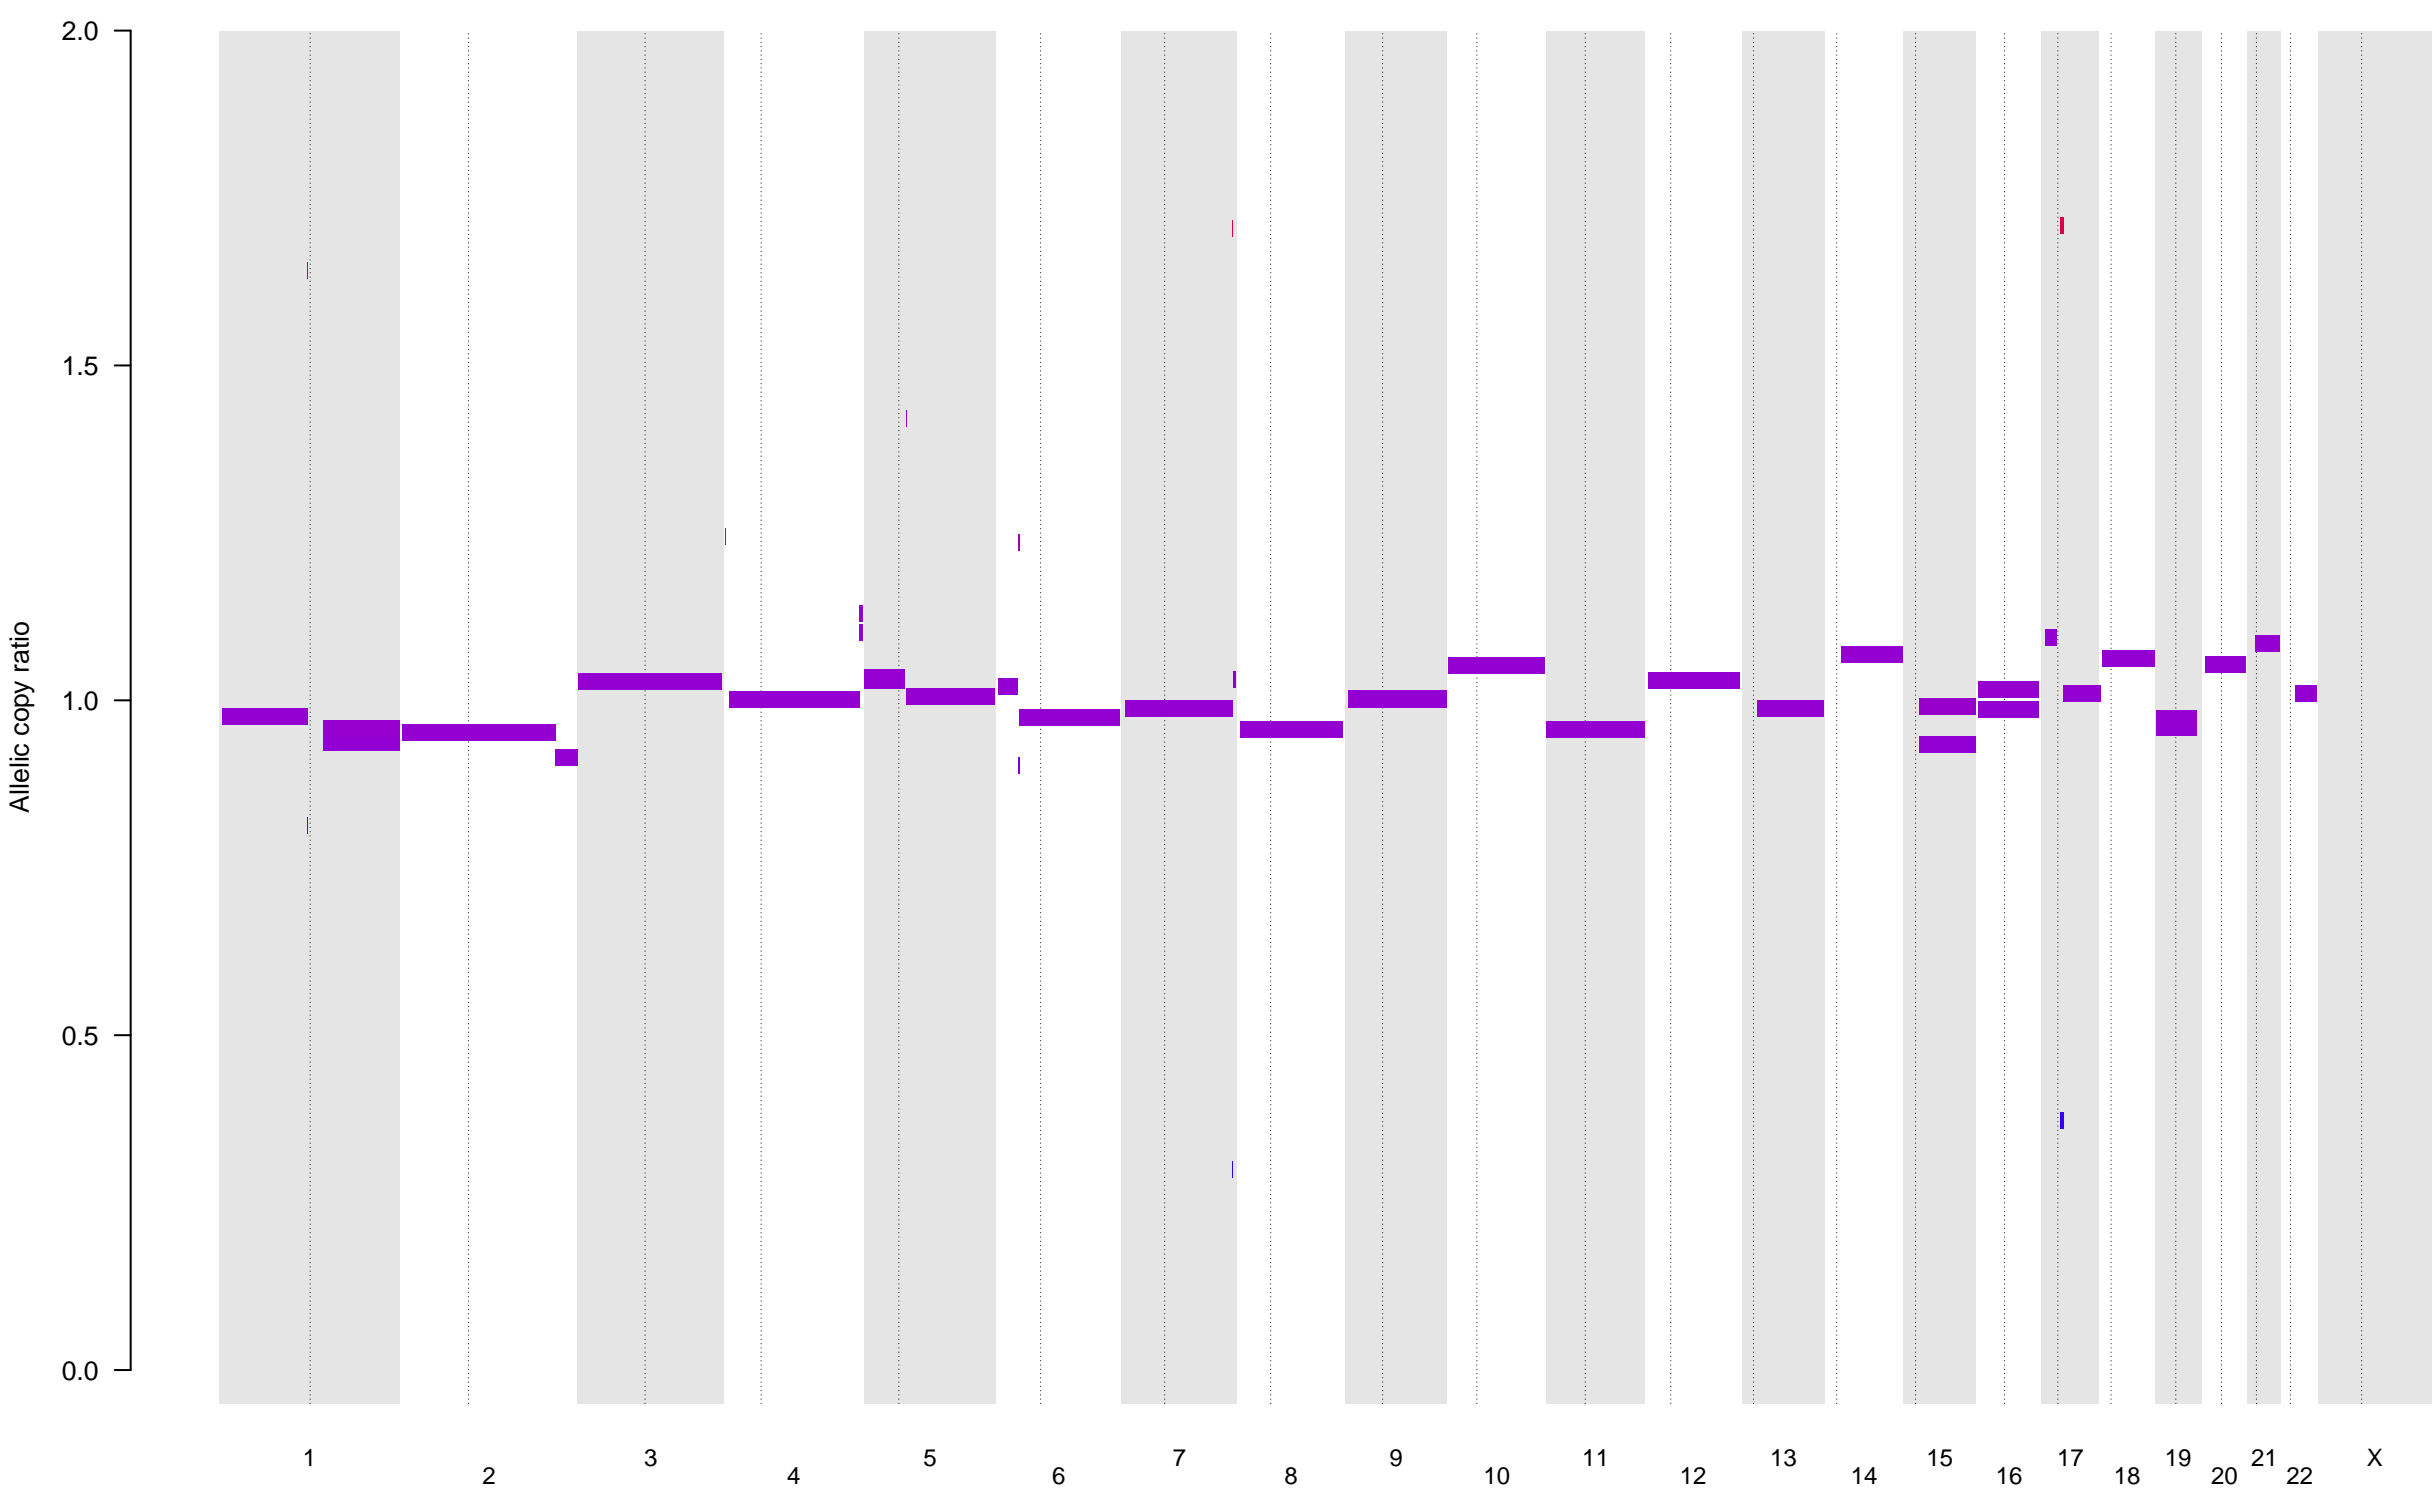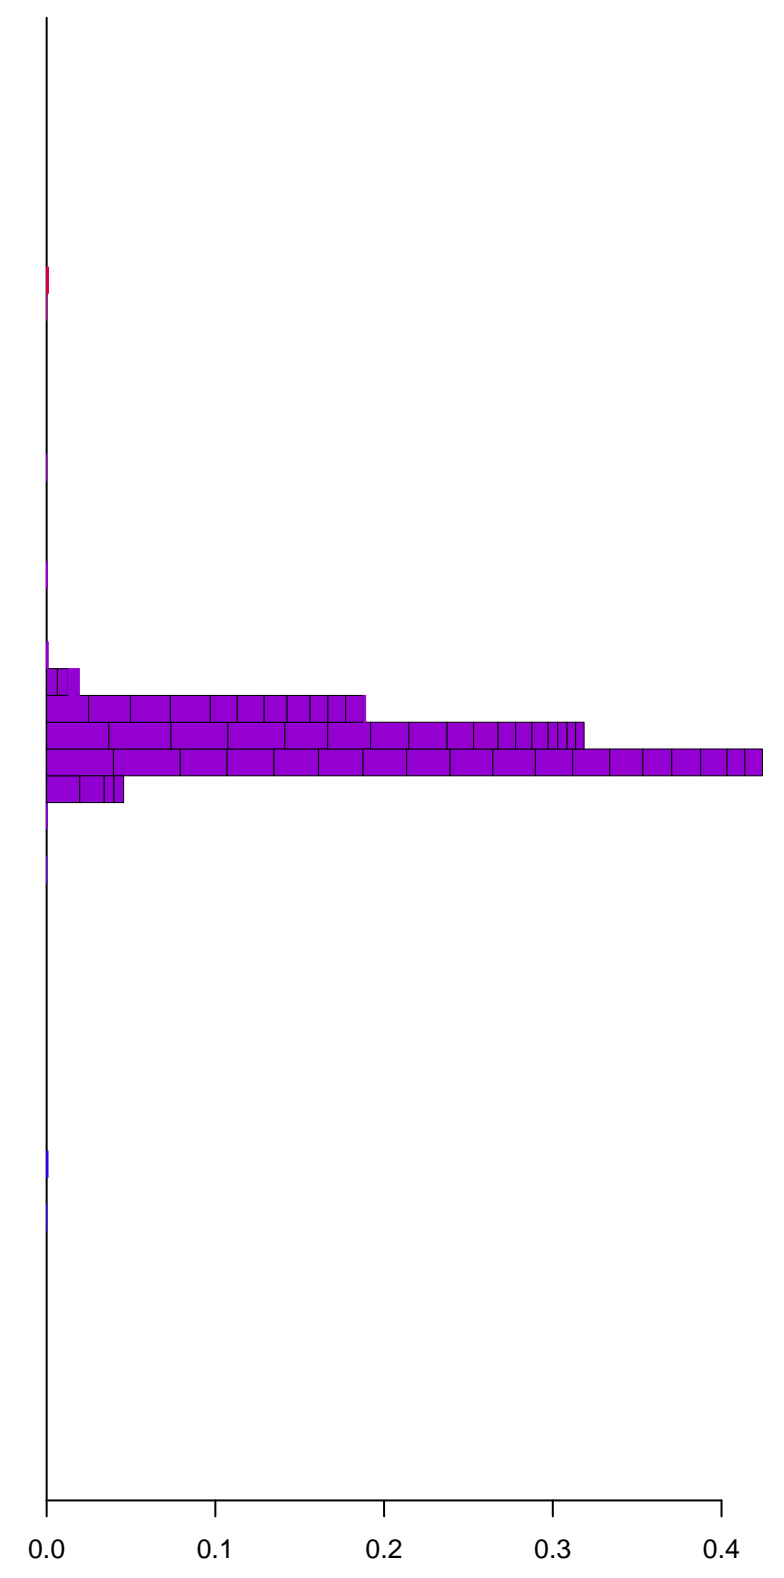

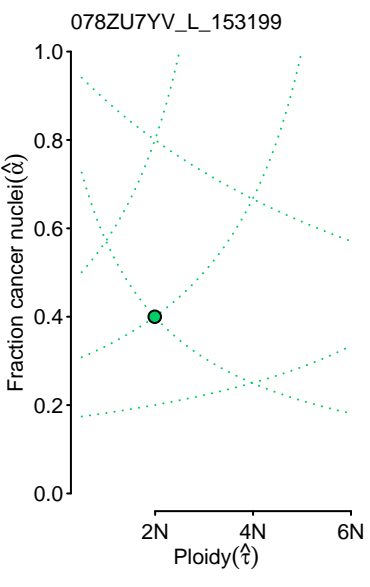

purity( $\hat{\alpha}$ ) = 0.4, ploidy:  $\hat{\delta} = 1.99$ ,  $\hat{\tau}_g = 2$   
 $\hat{\theta}_z = 0.23$ ,  $\hat{\theta}_a = 1.304$ , WGD=0  
 SCNA LL = -256.45, SSNV LL = -4769.61, SCNA Ev = -95.59869

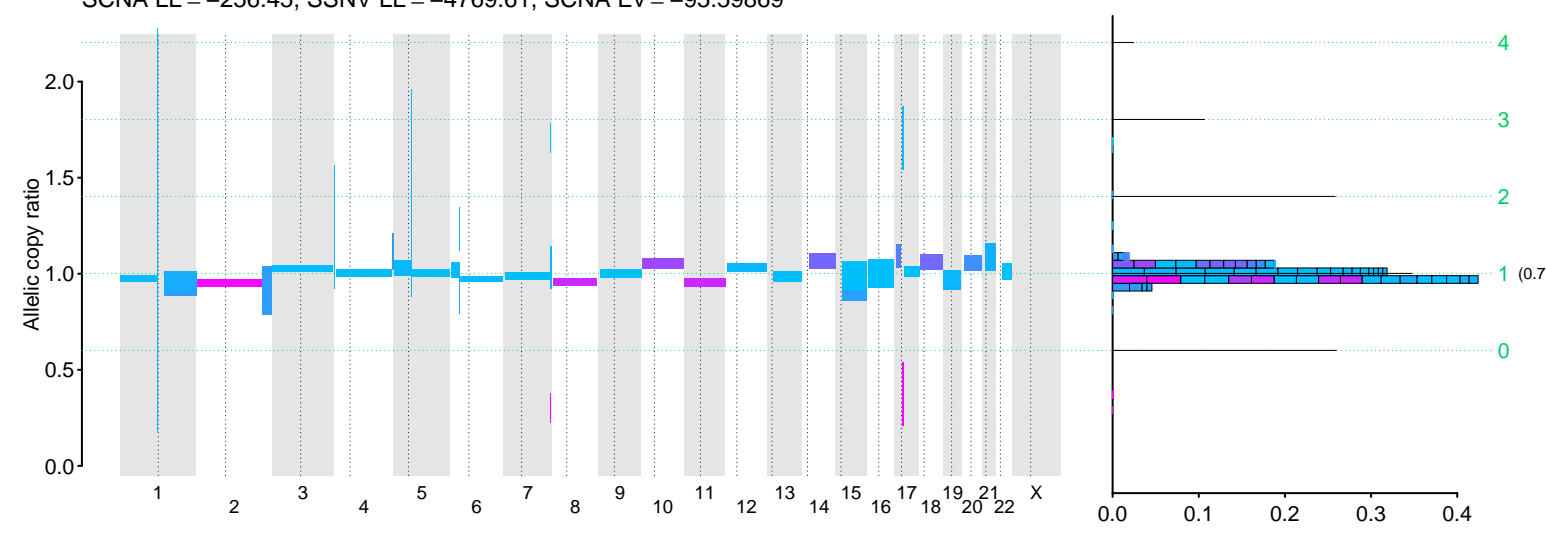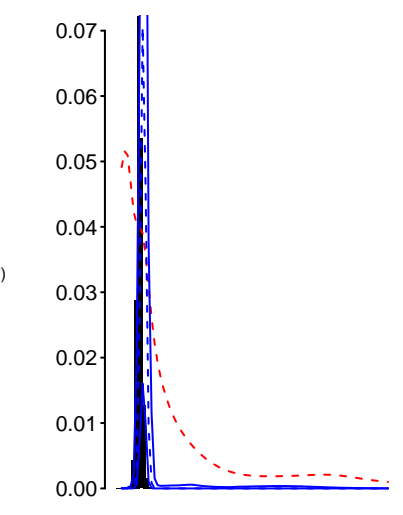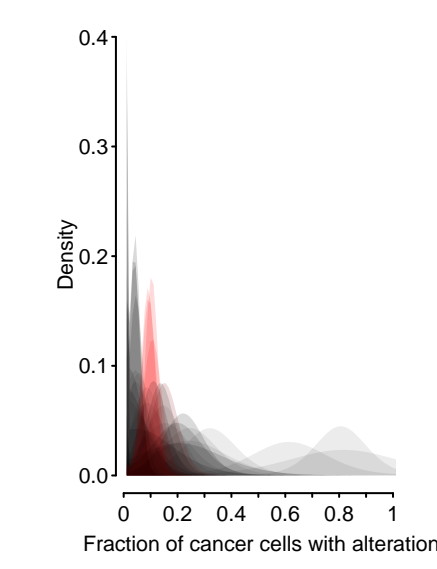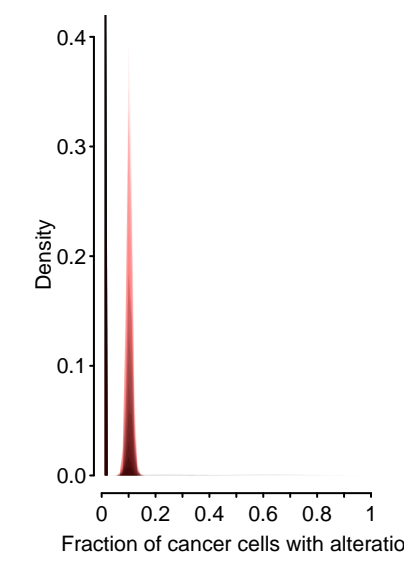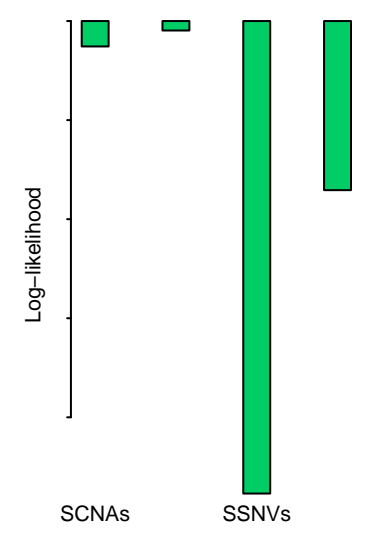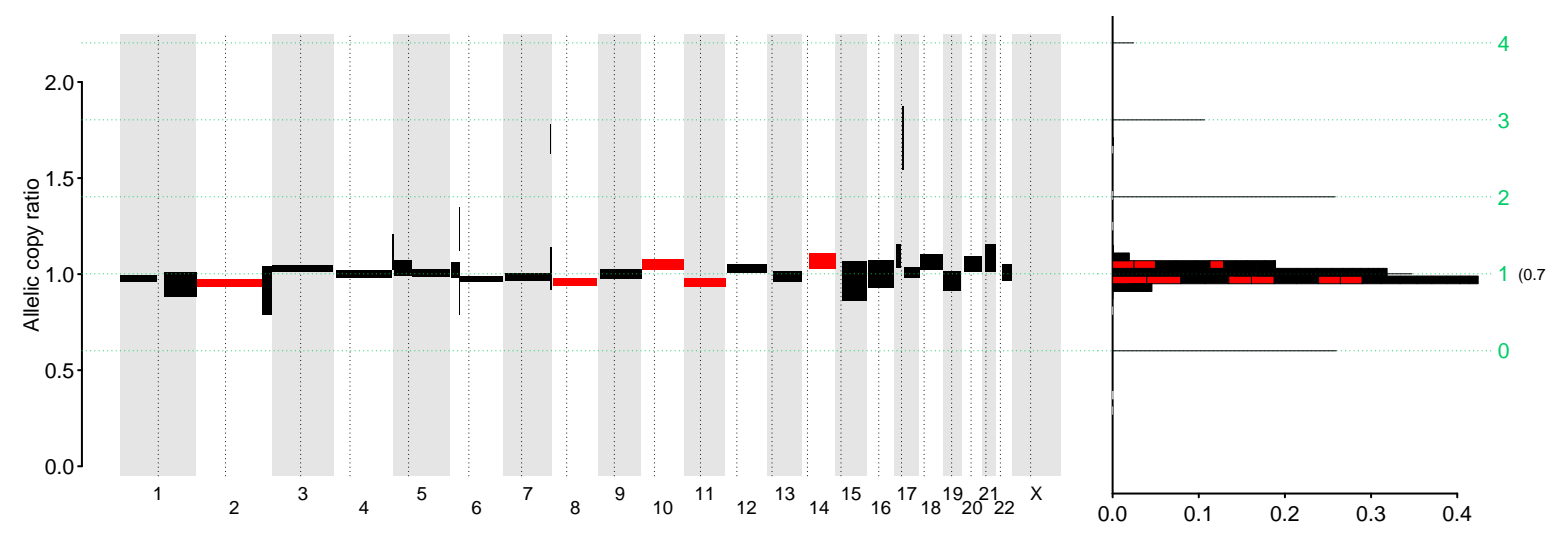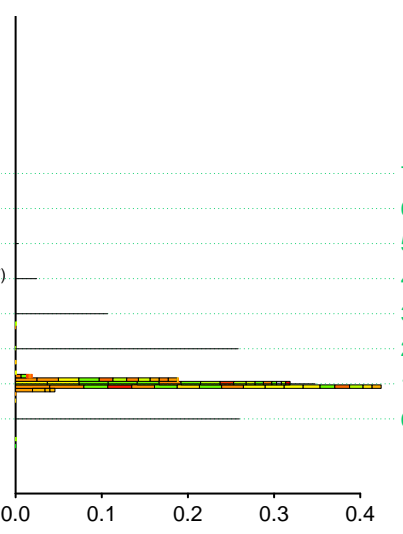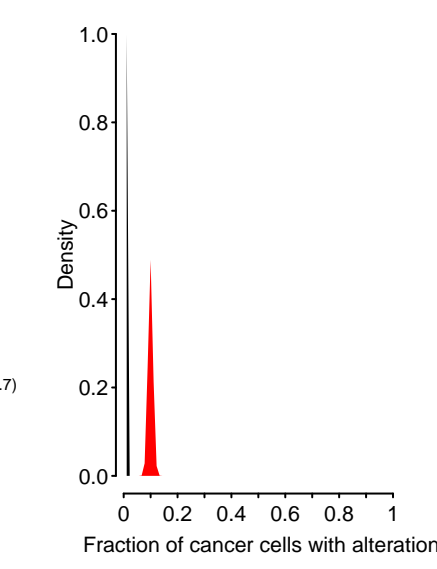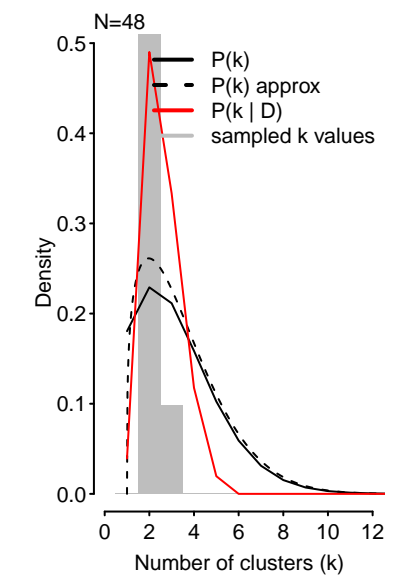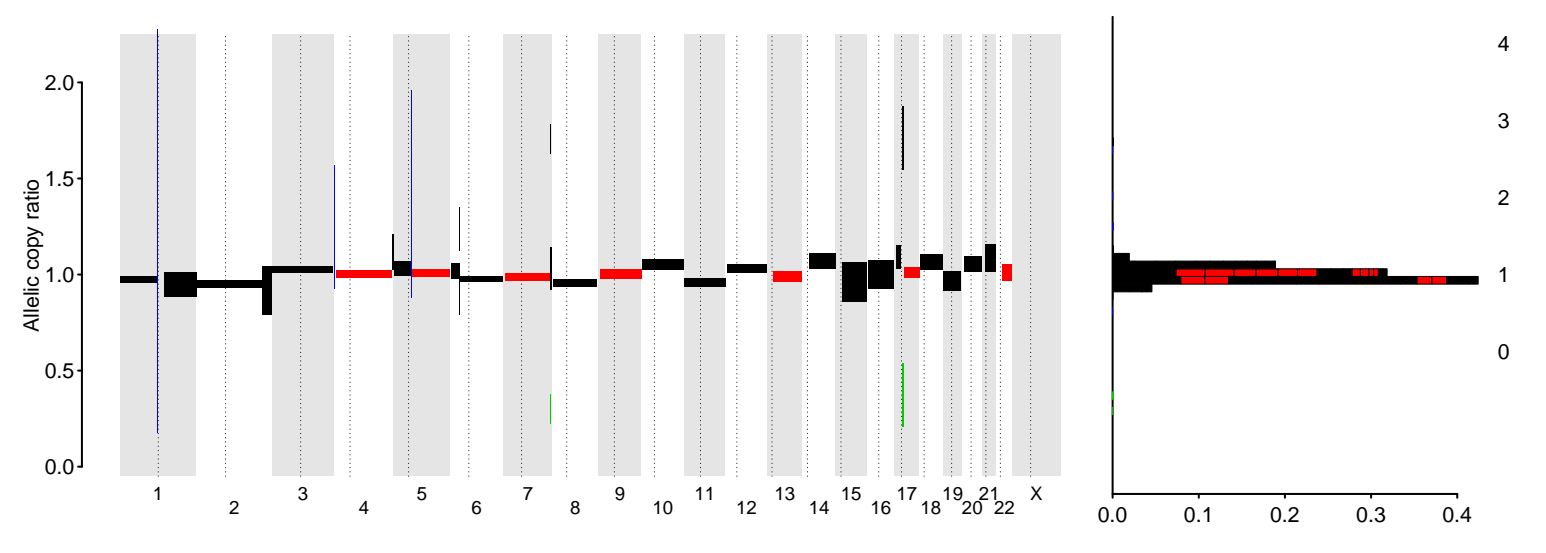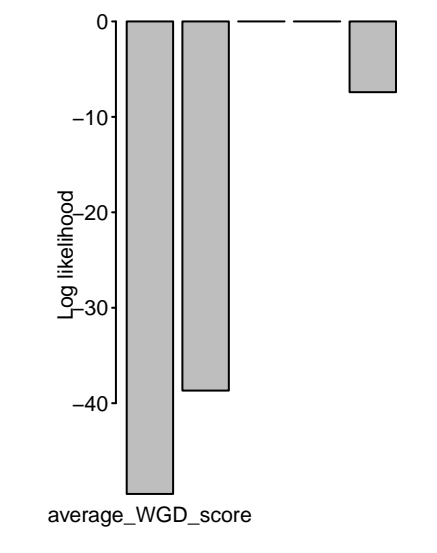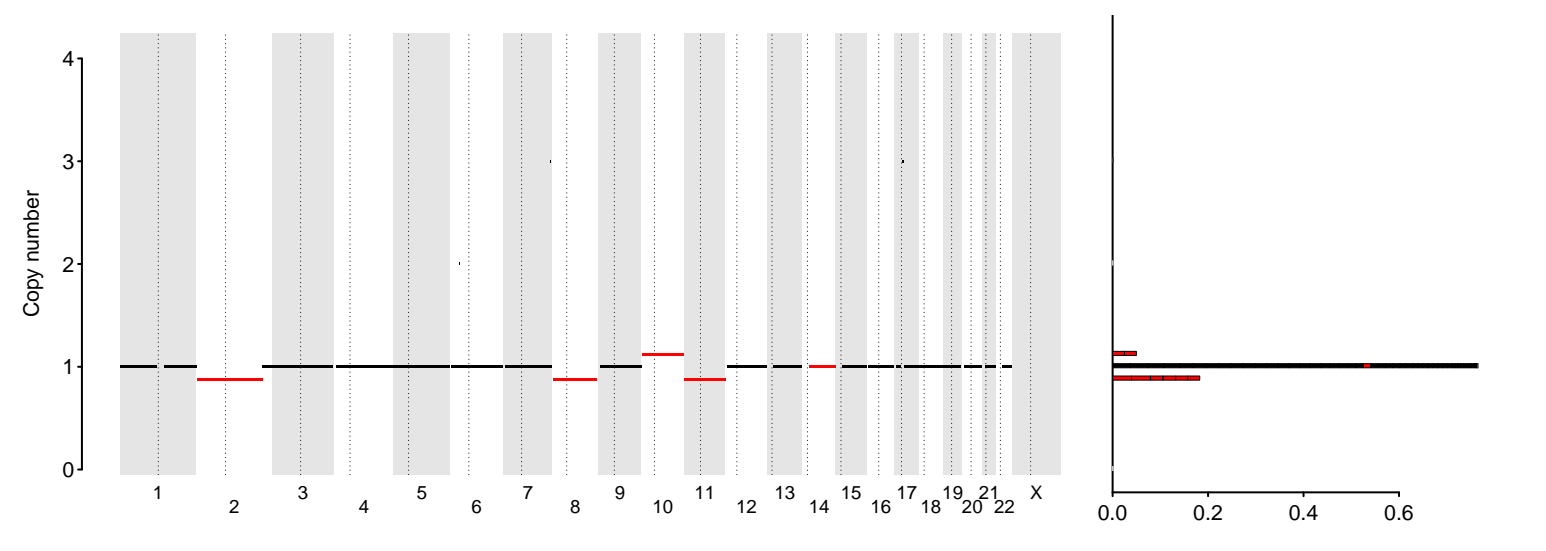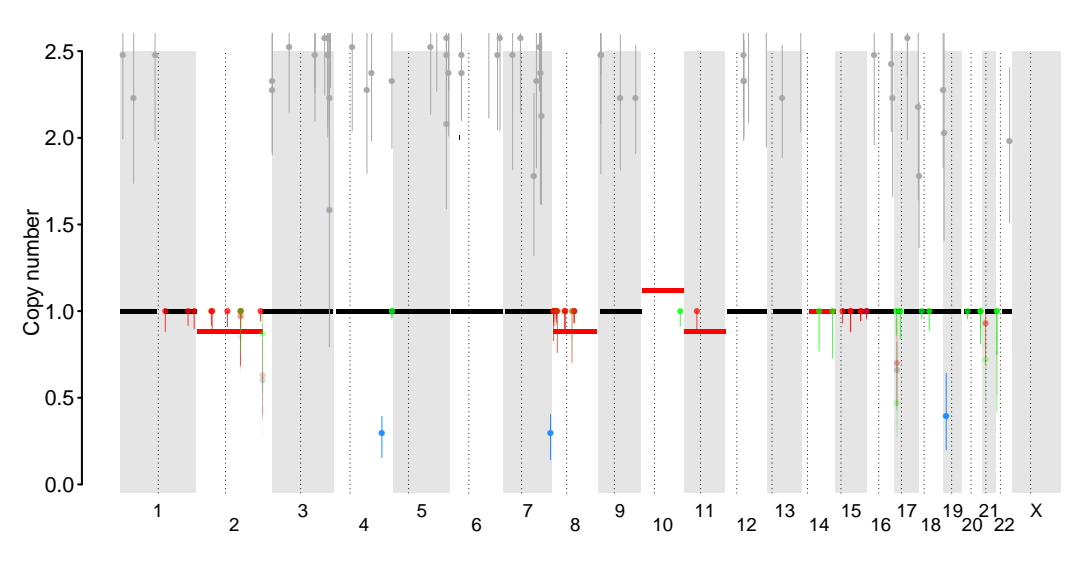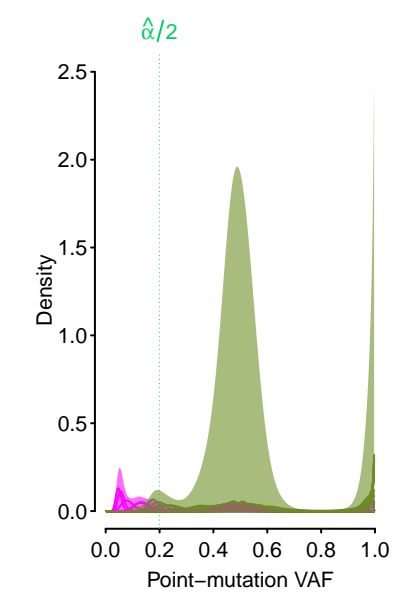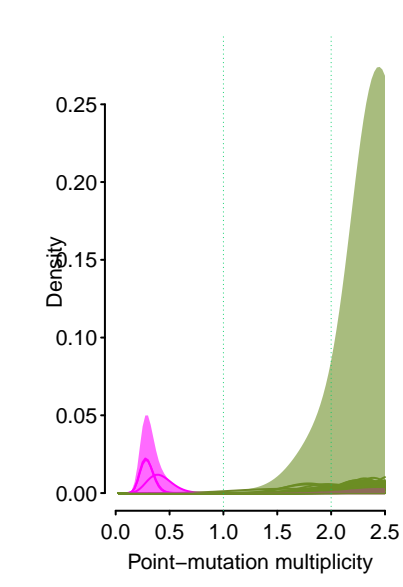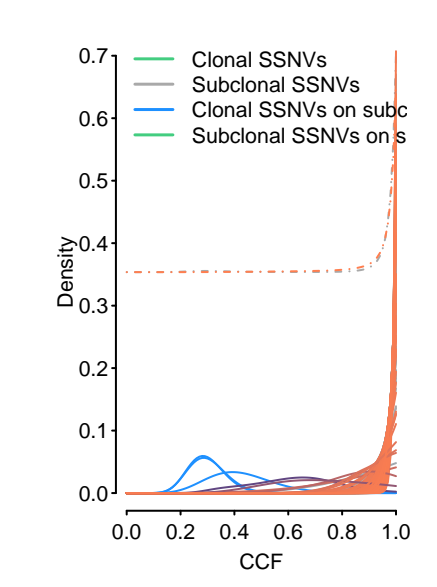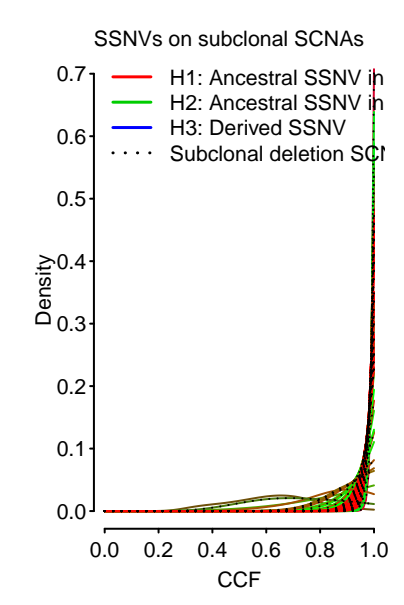

Sample 28

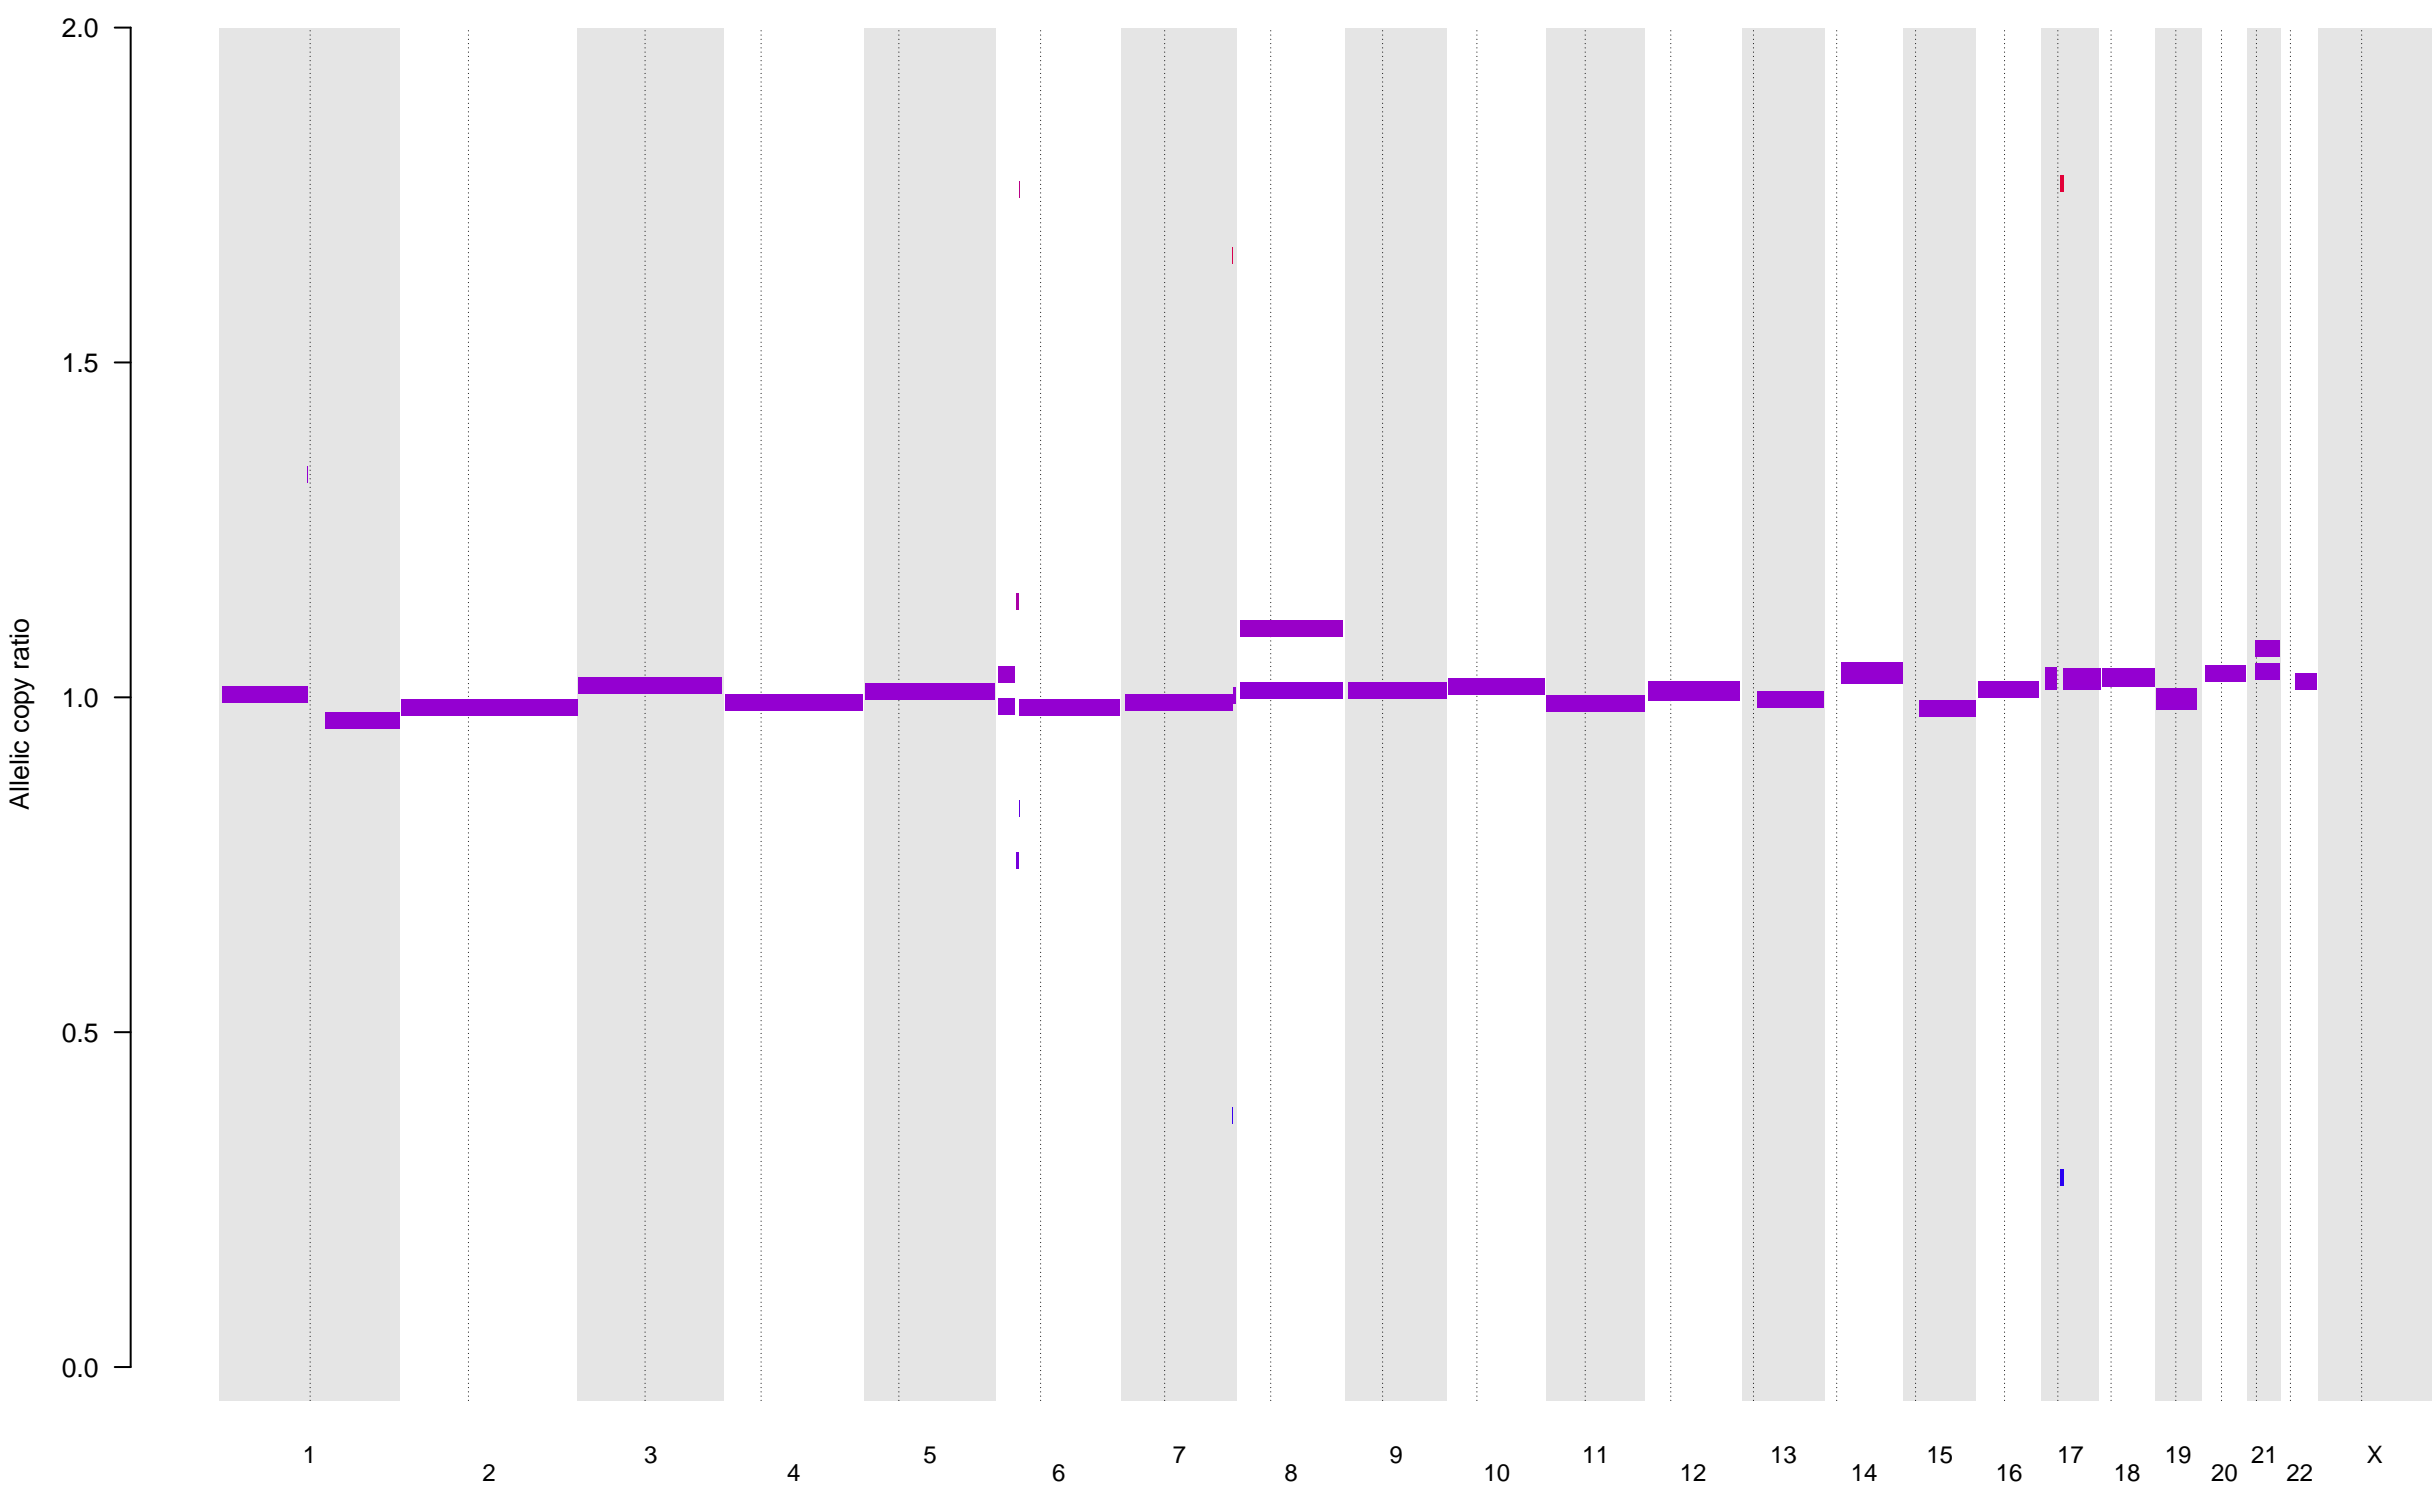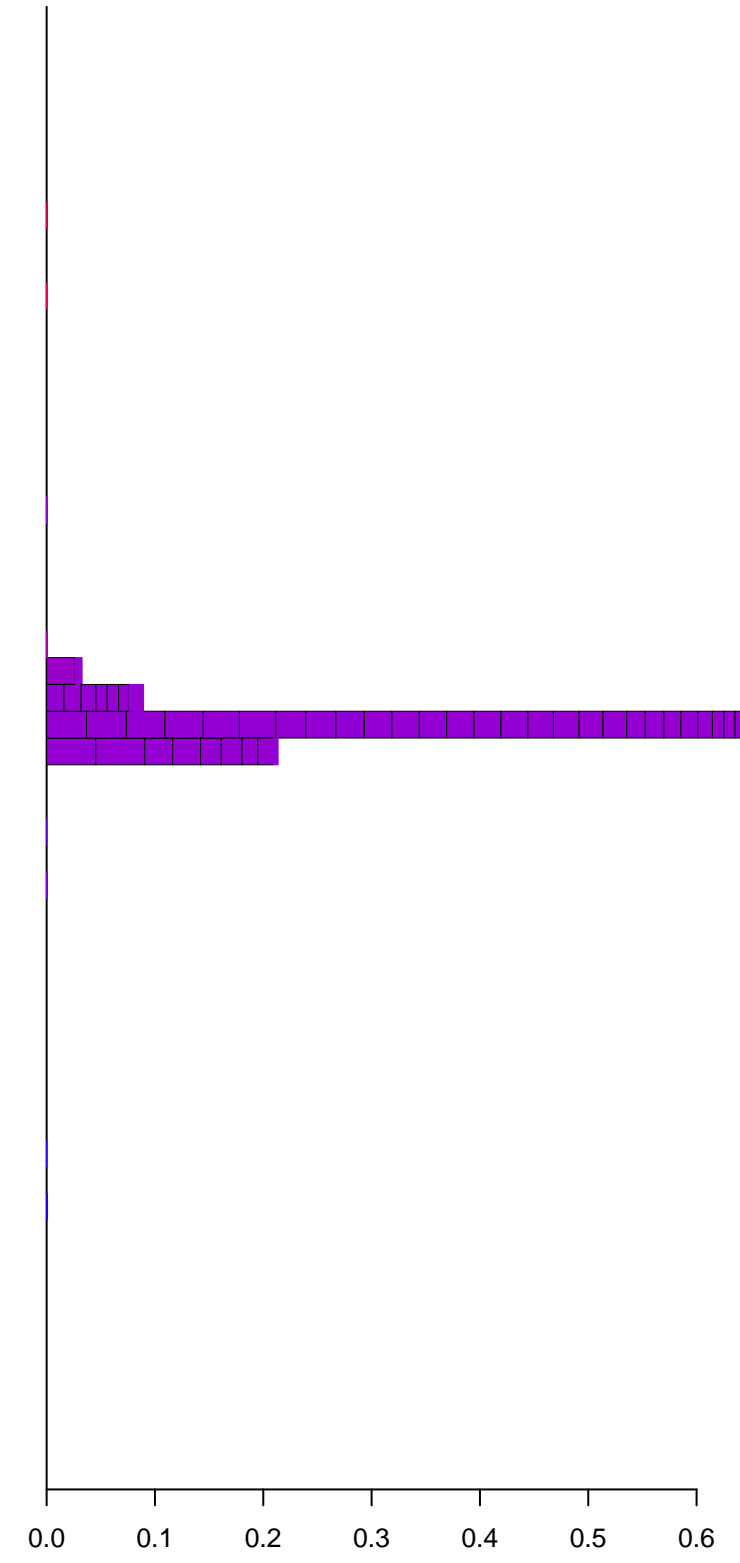

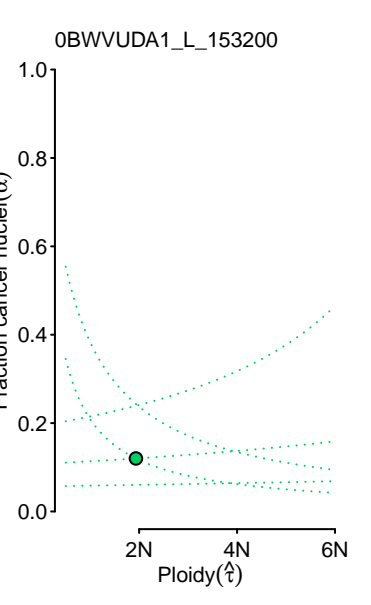

purity( $\hat{\alpha}$ ) = 0.12, ploidy:  $\hat{k} = 1.93$ ,  $\hat{k}_g = 2.07$   
 $\theta_z = 0$ ,  $\theta_0 = 1.684$ , WGD=0  
 SCNA LL = -229.16, SSNV LL = -12690.21, SCNA Ev = -35.45709

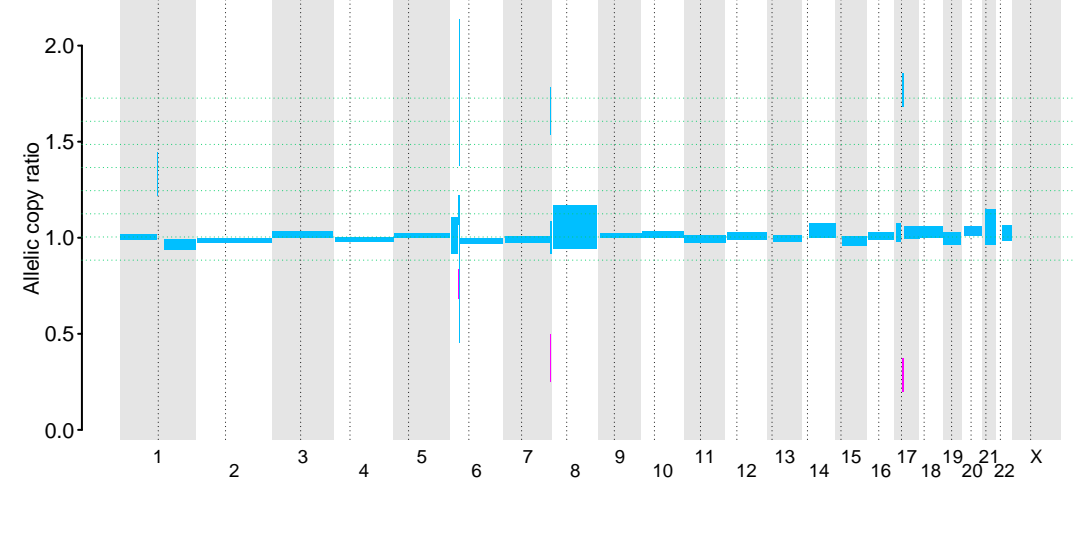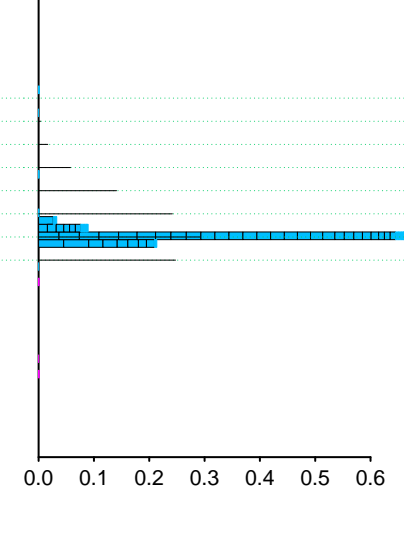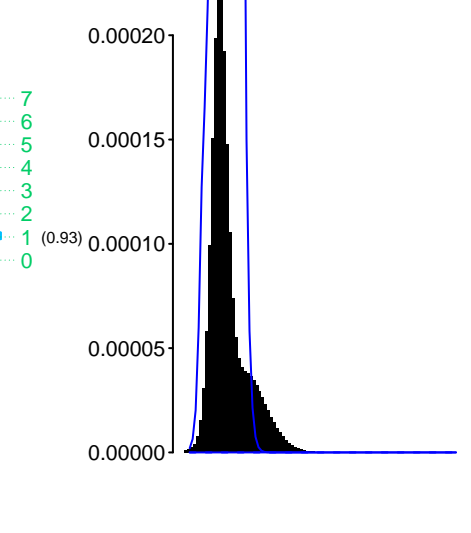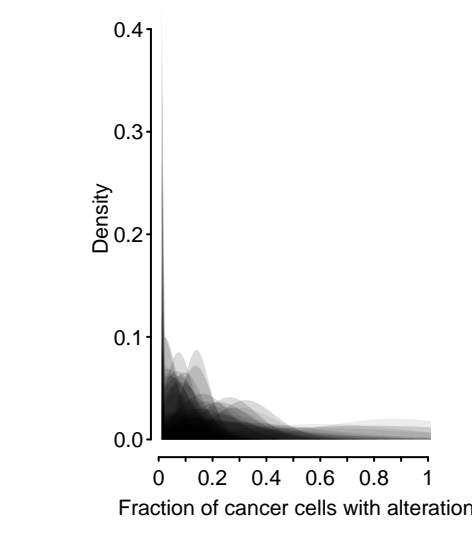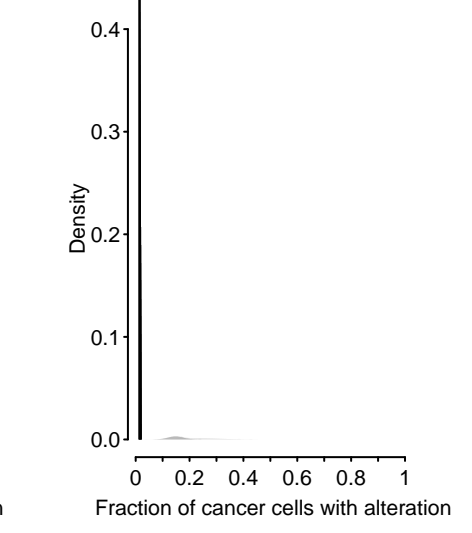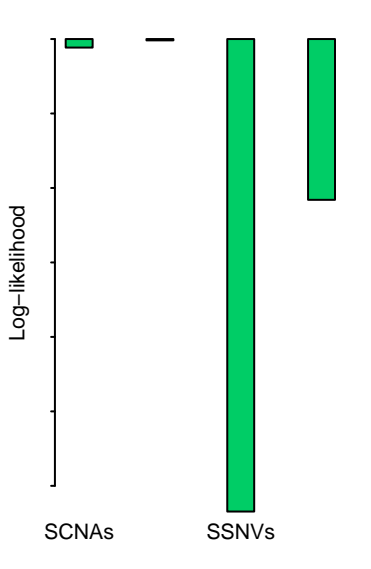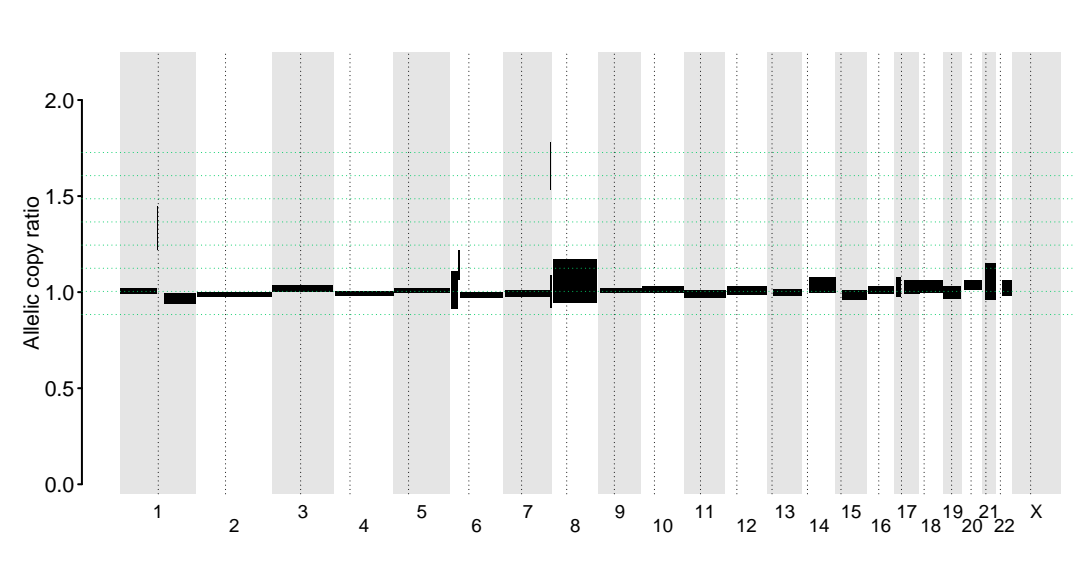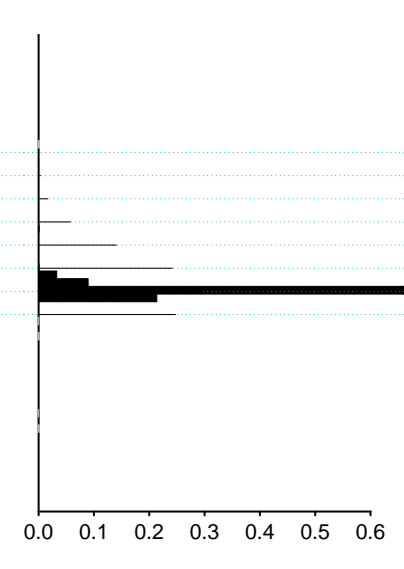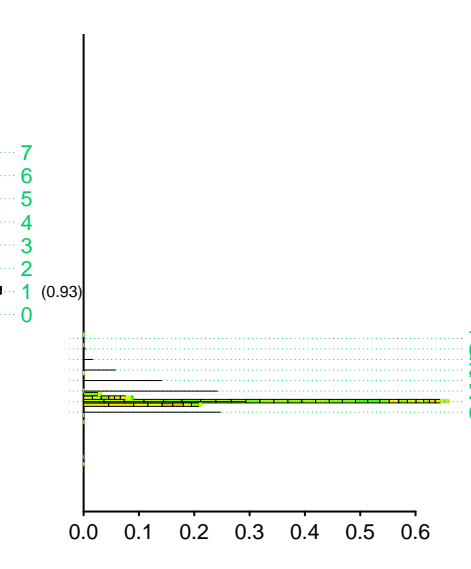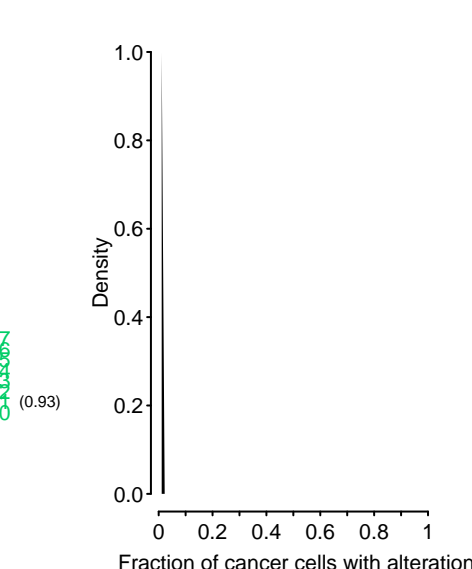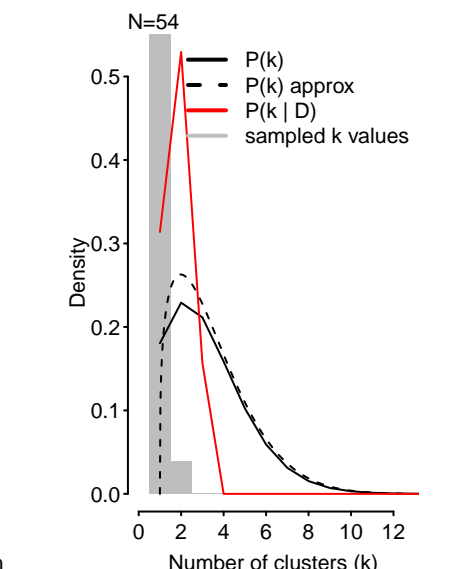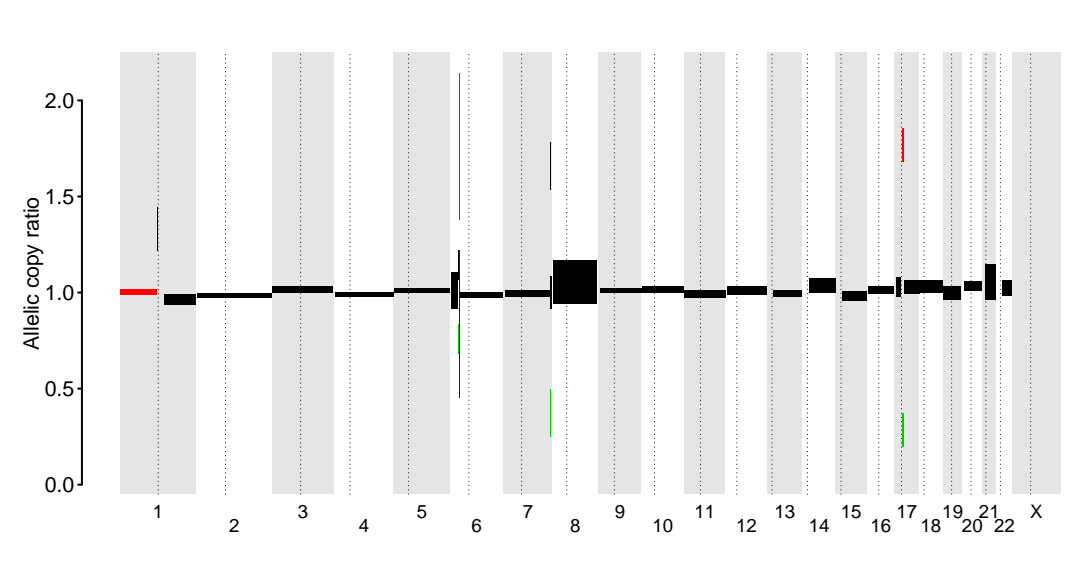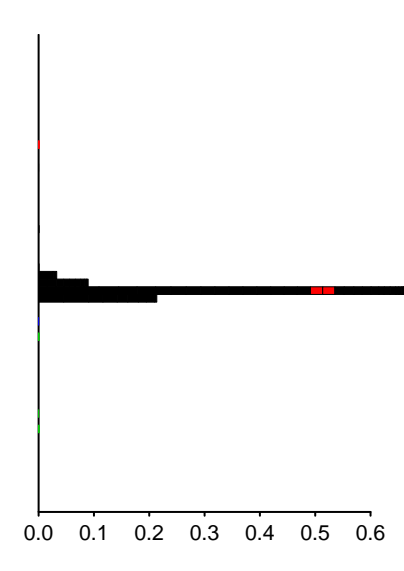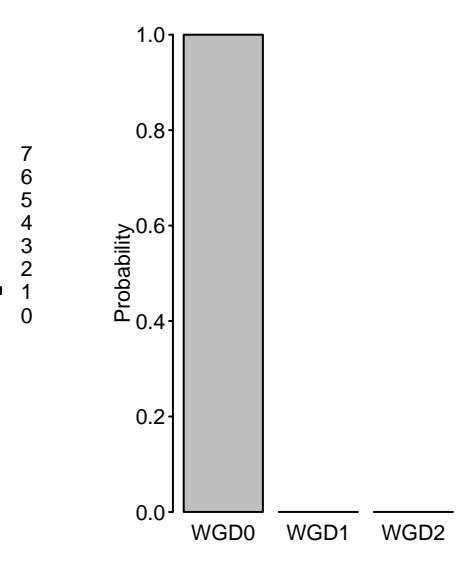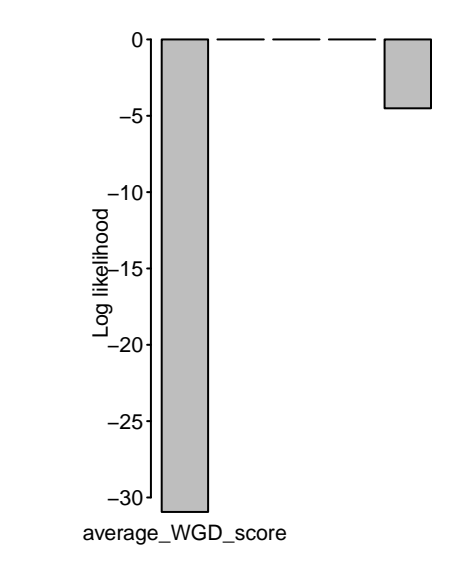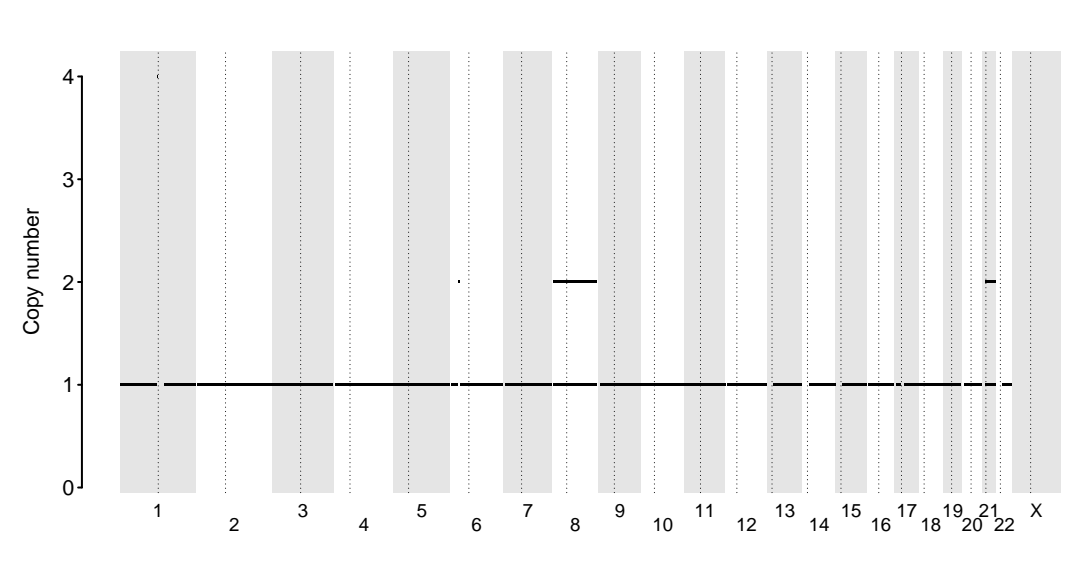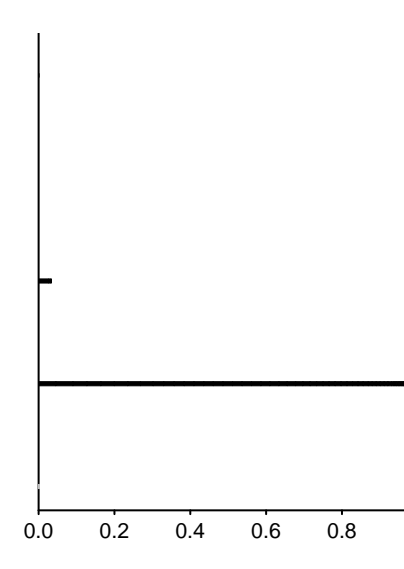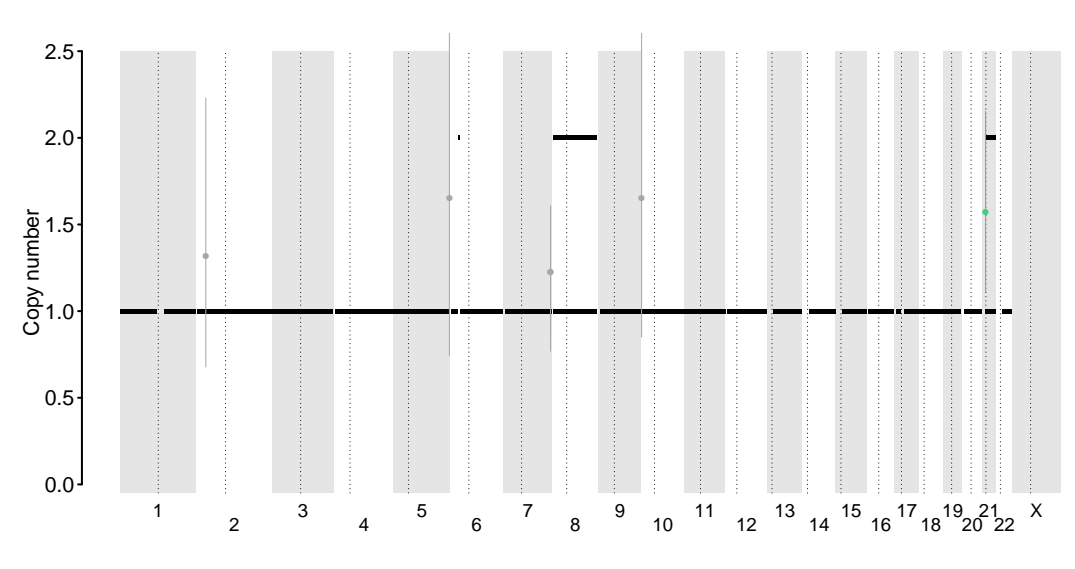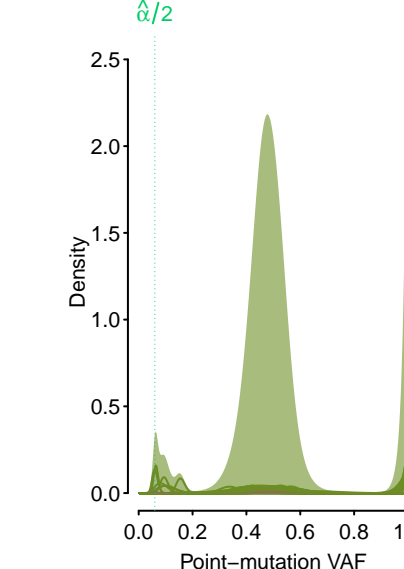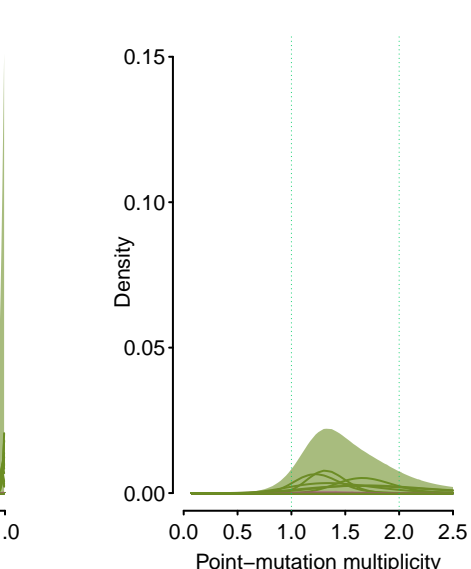

Sample 29

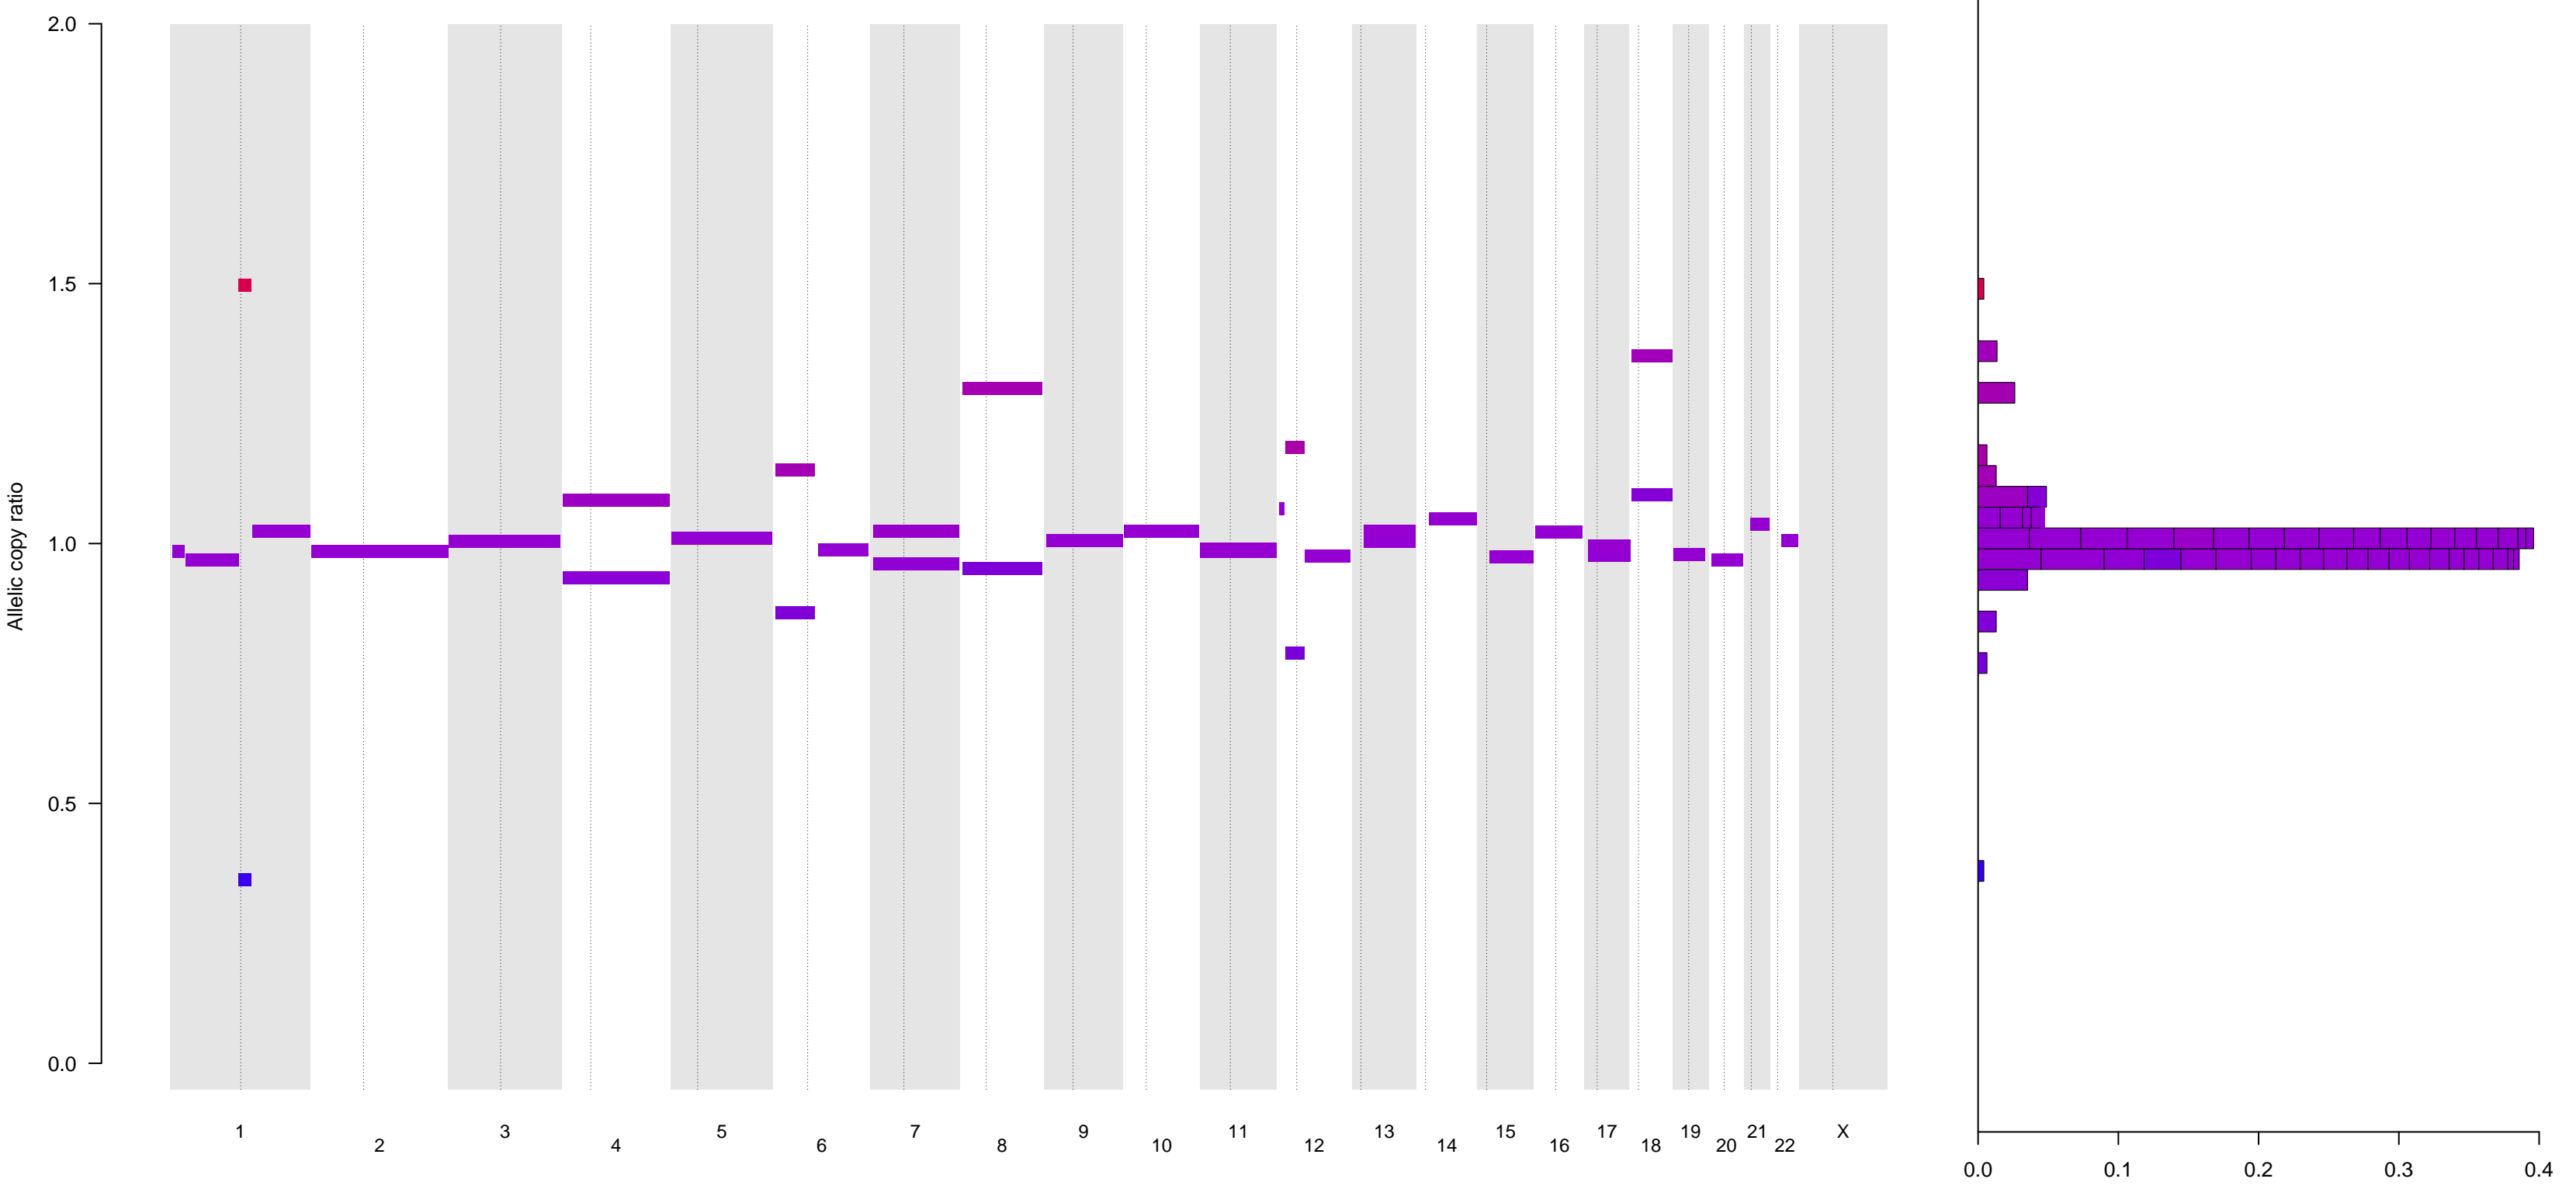

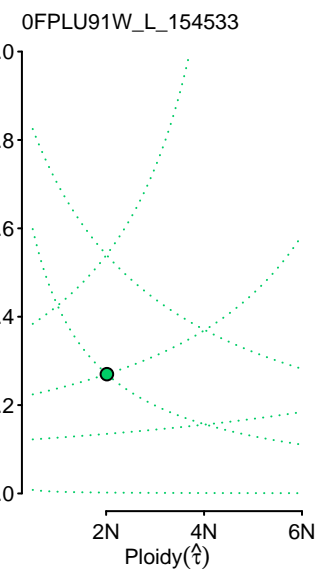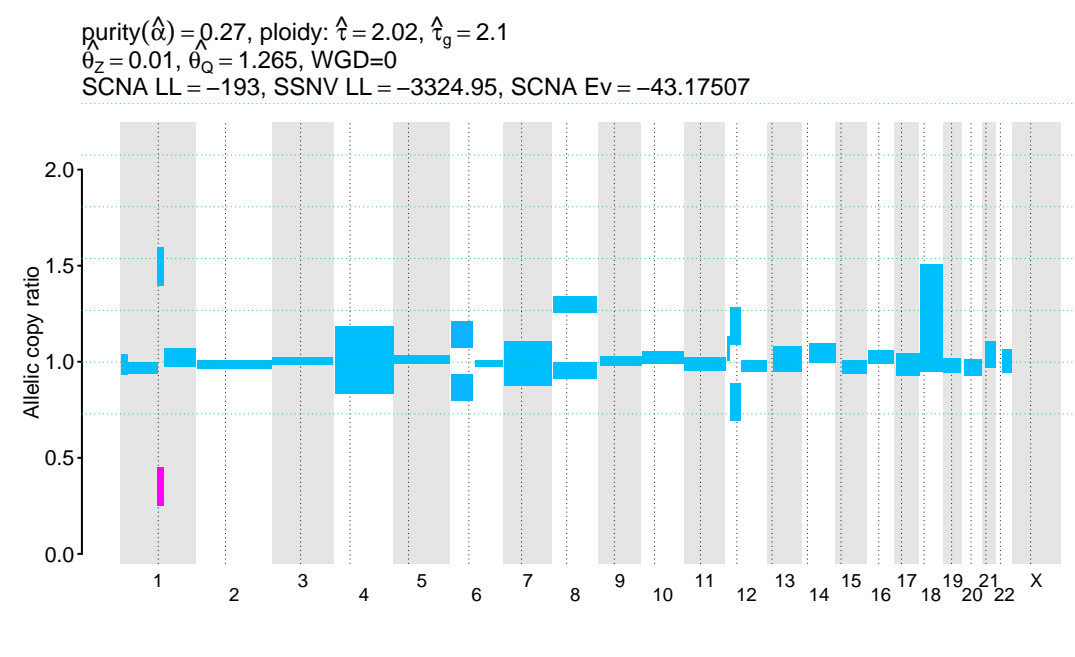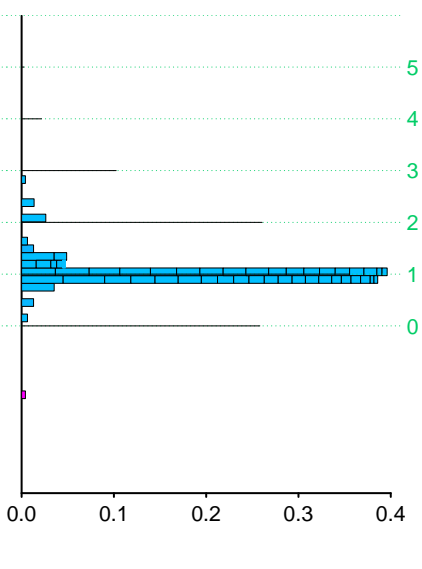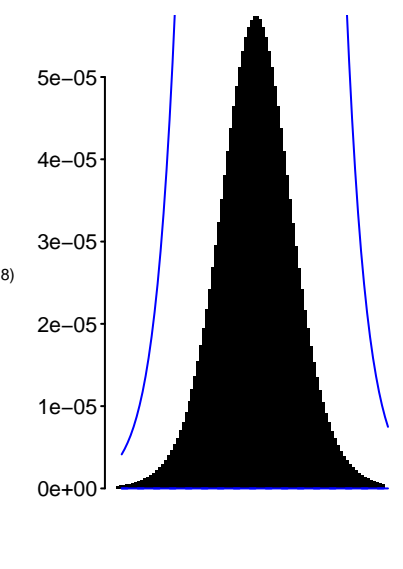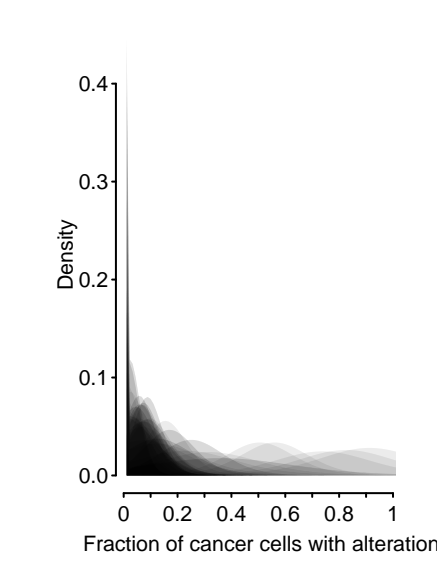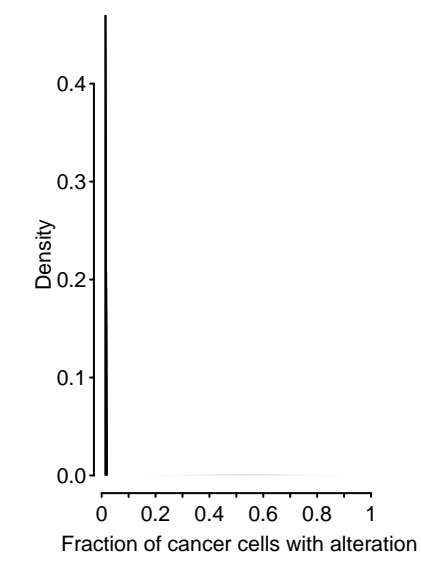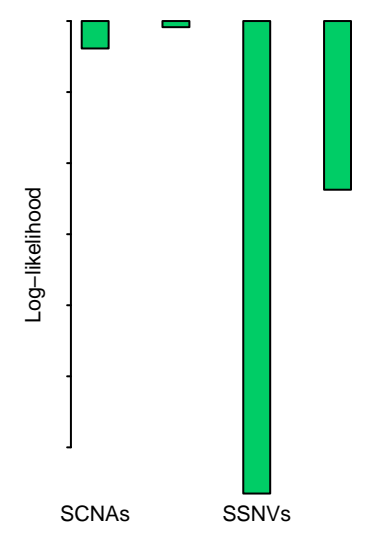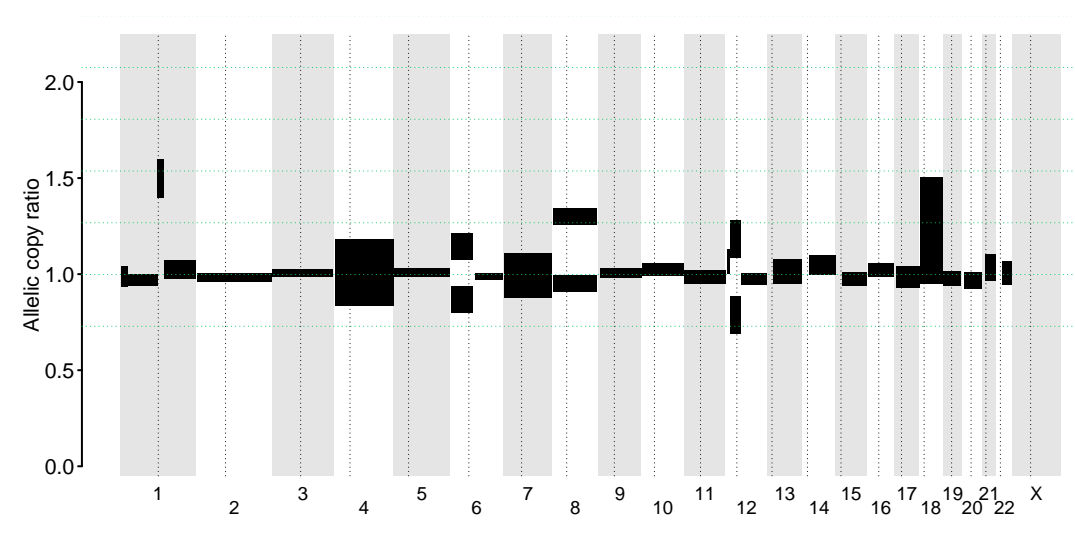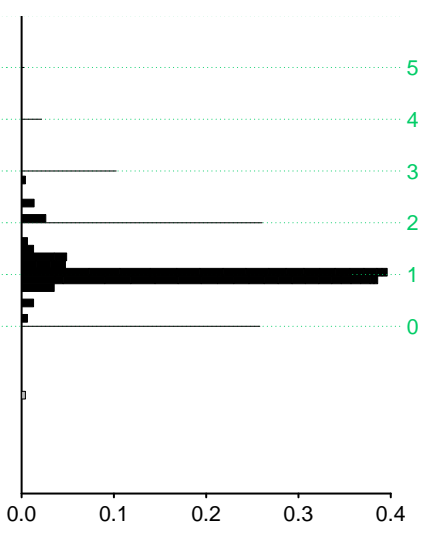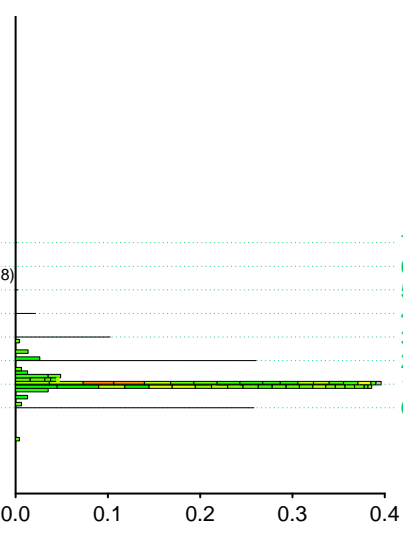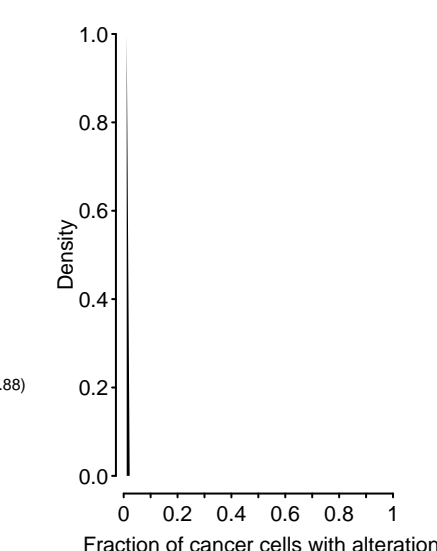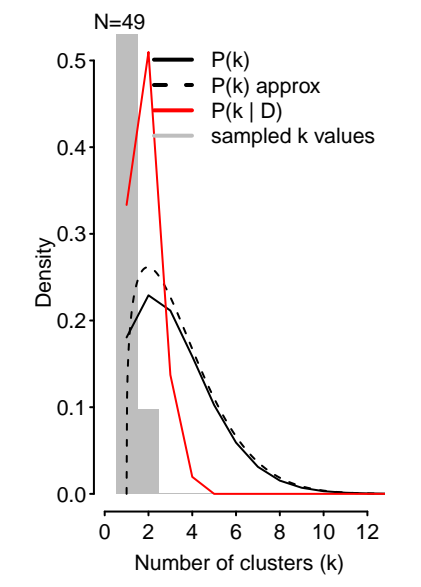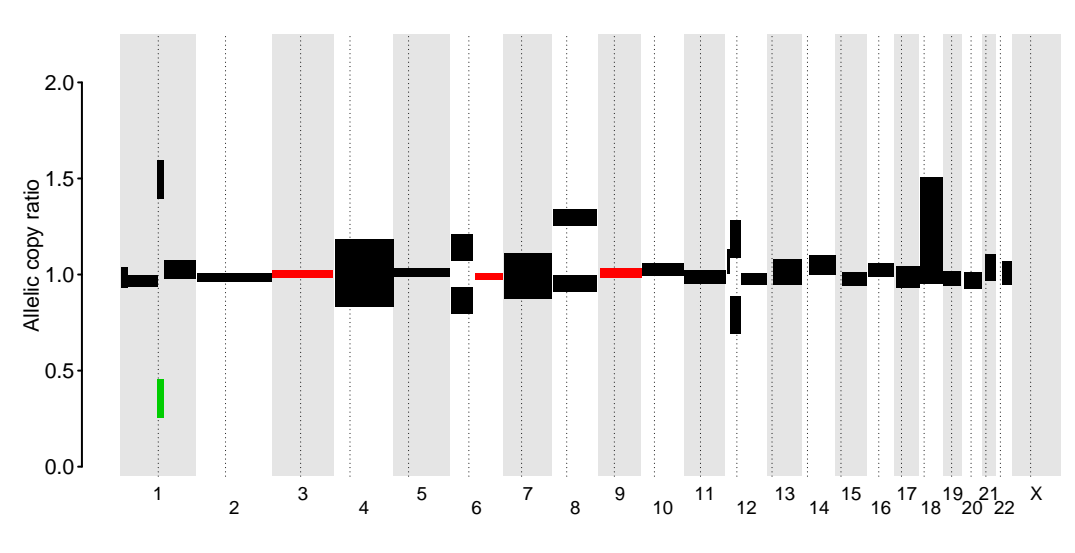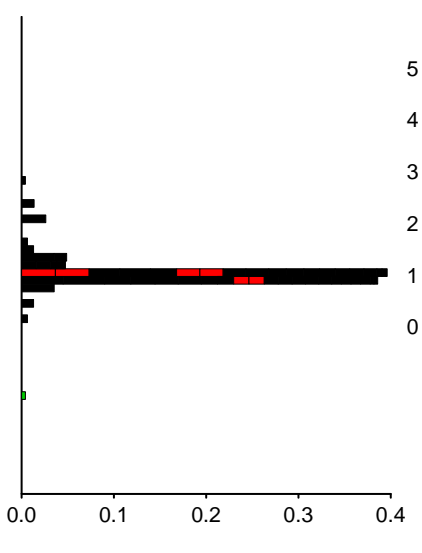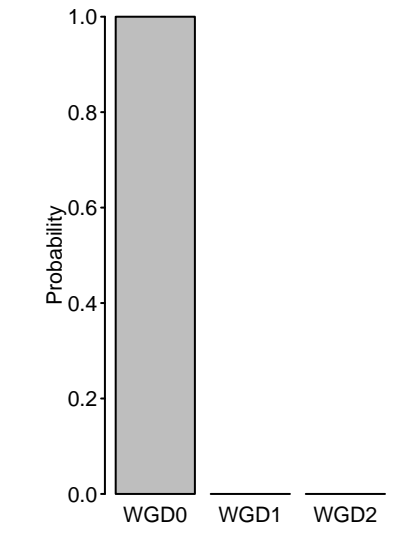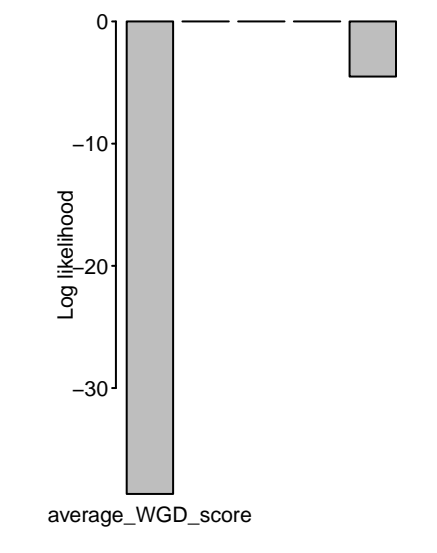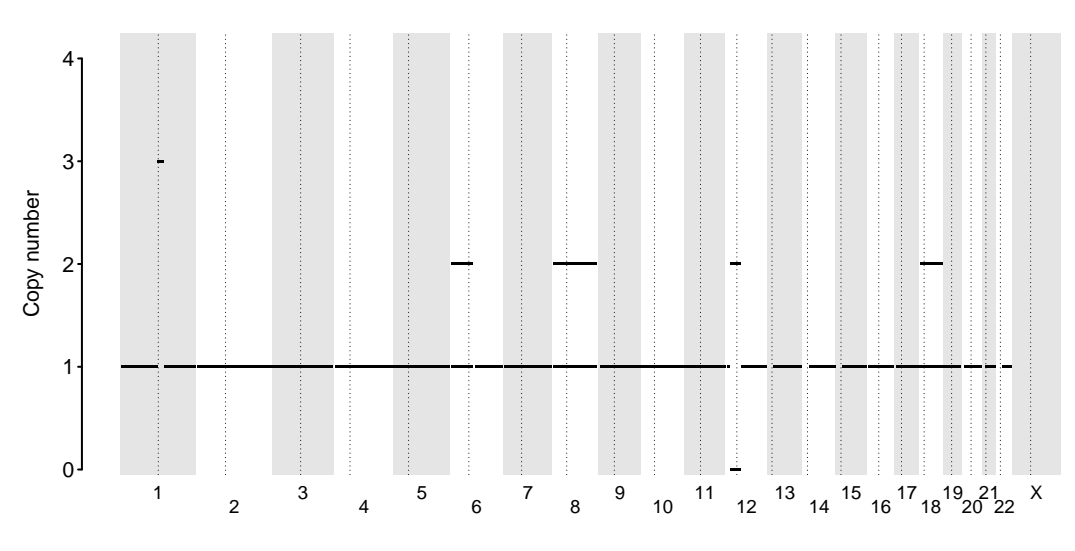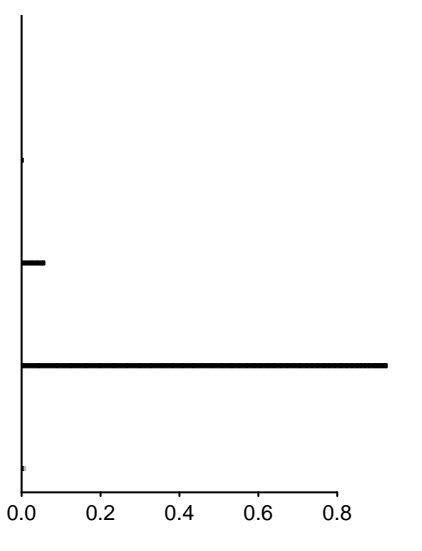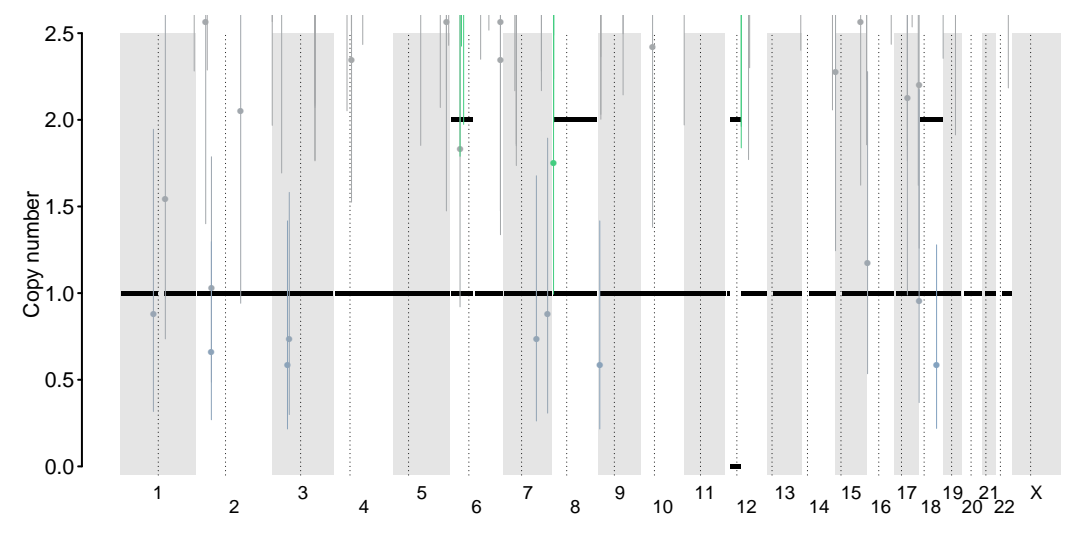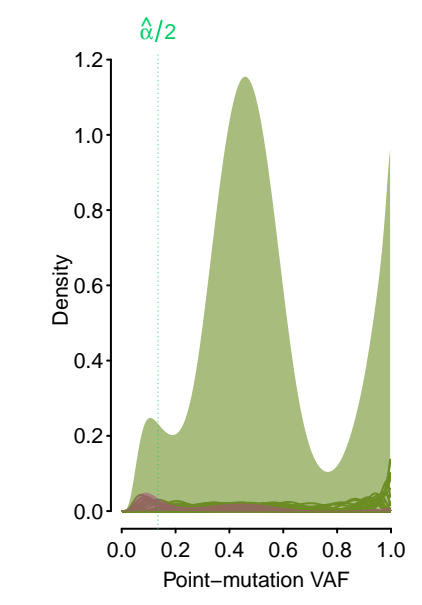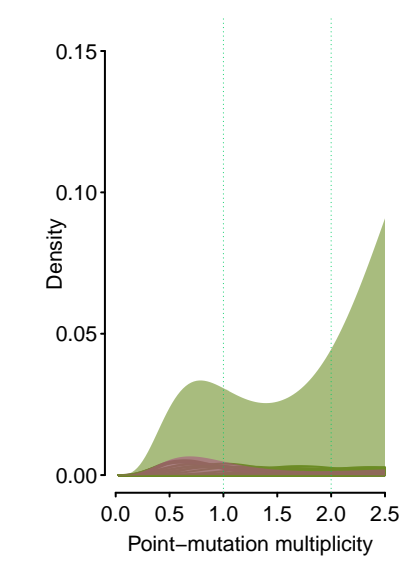

Sample 30

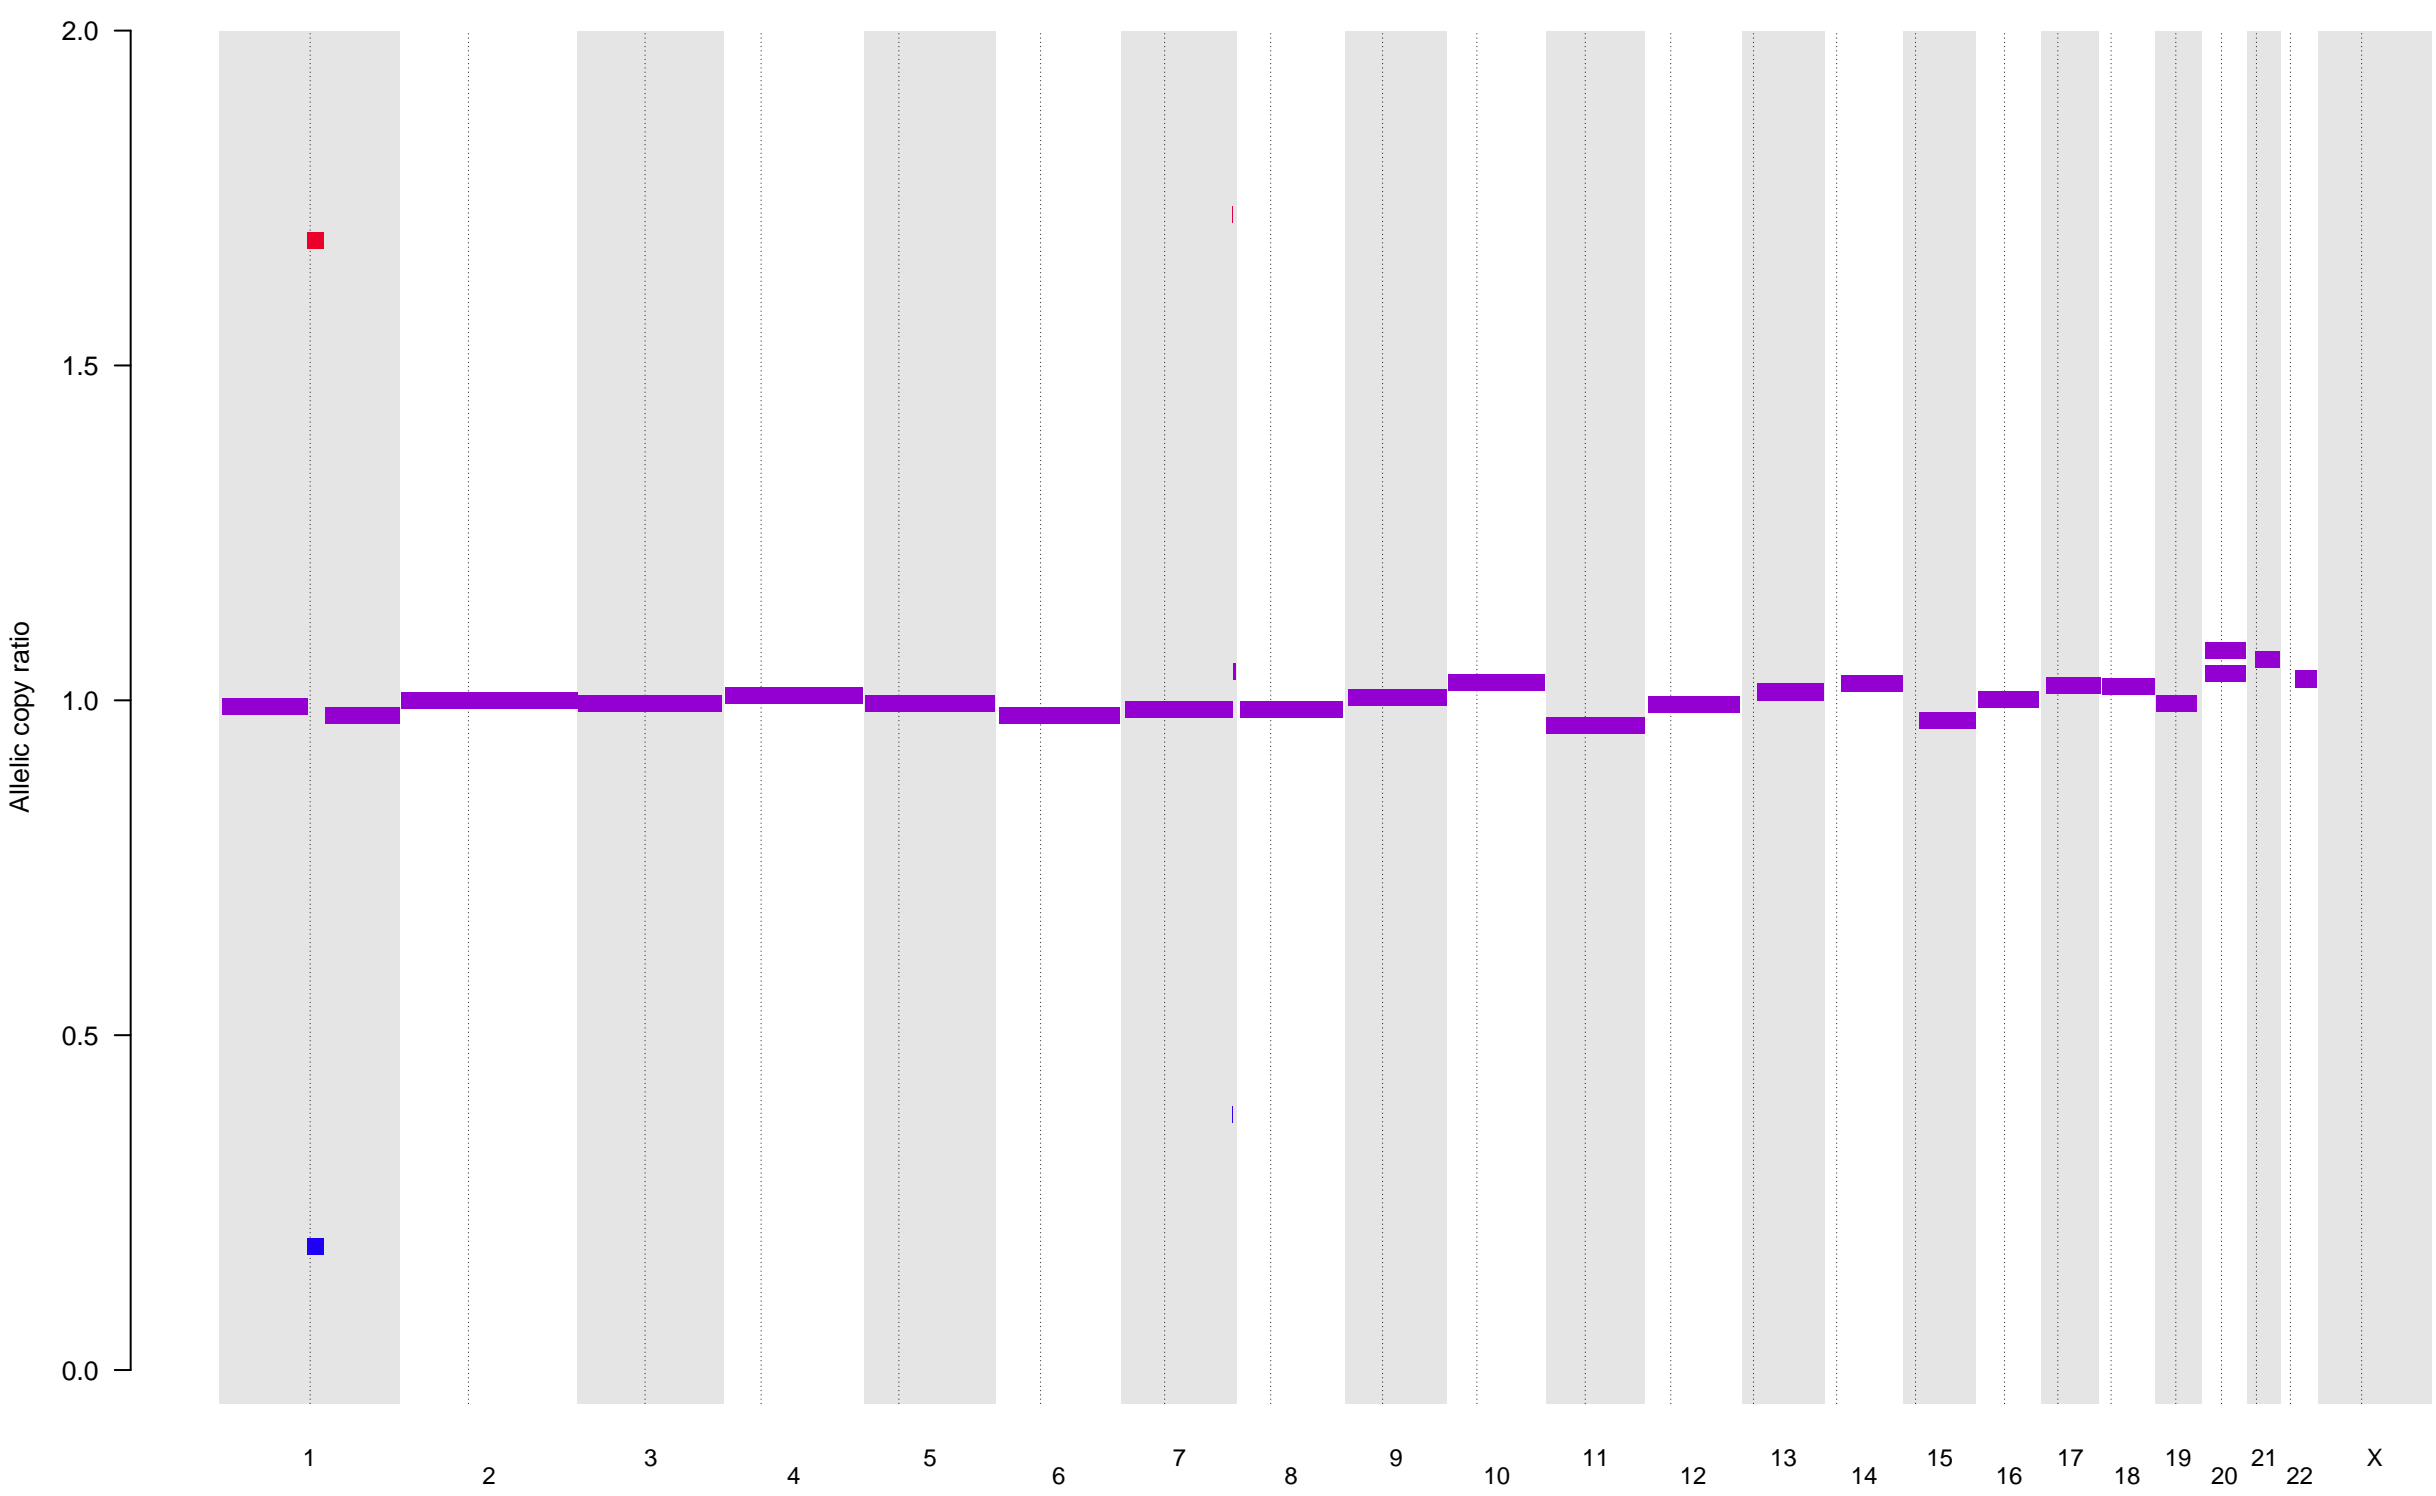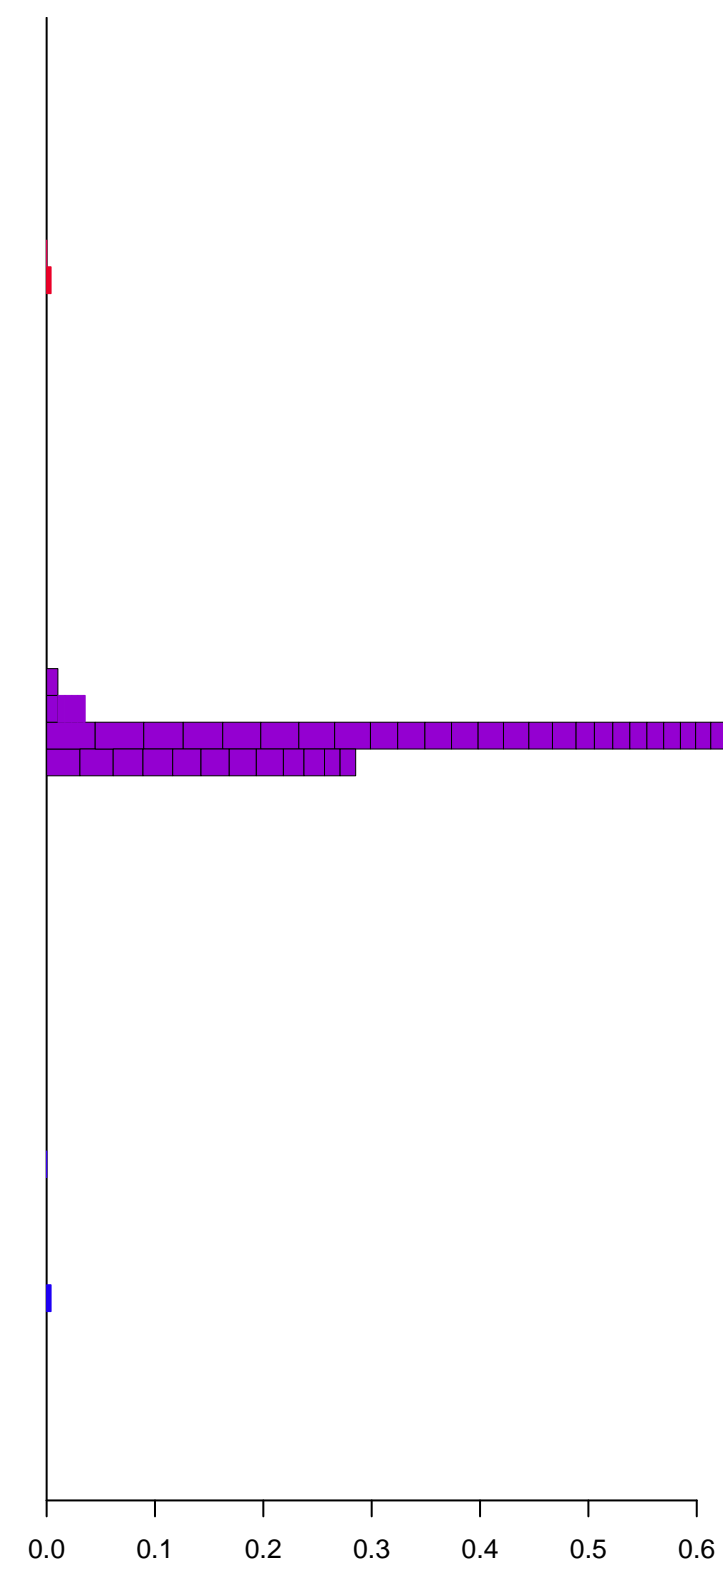

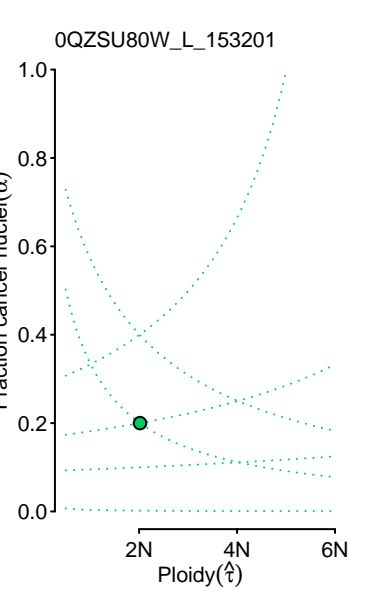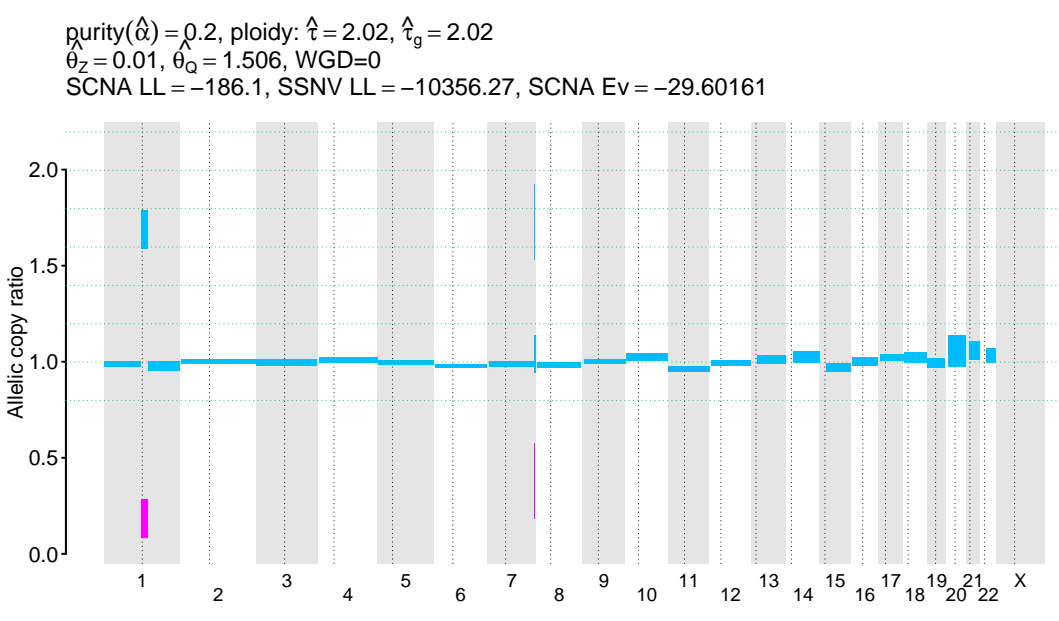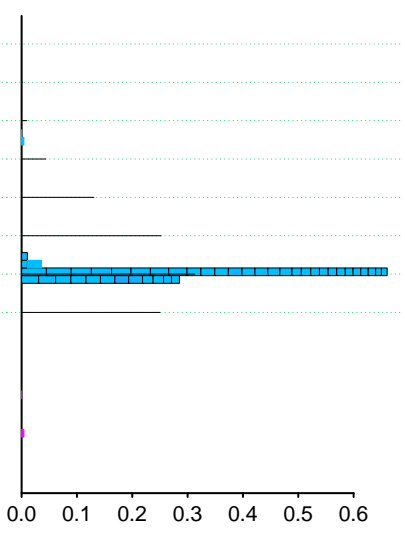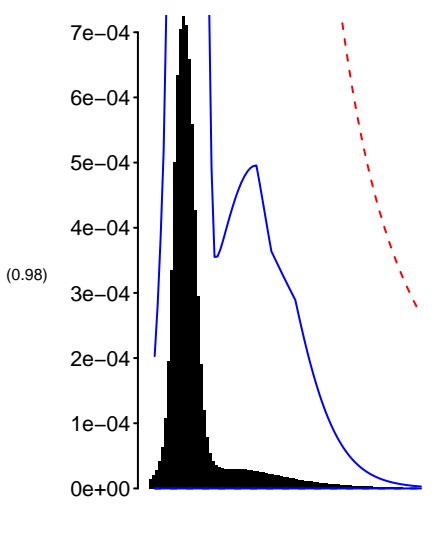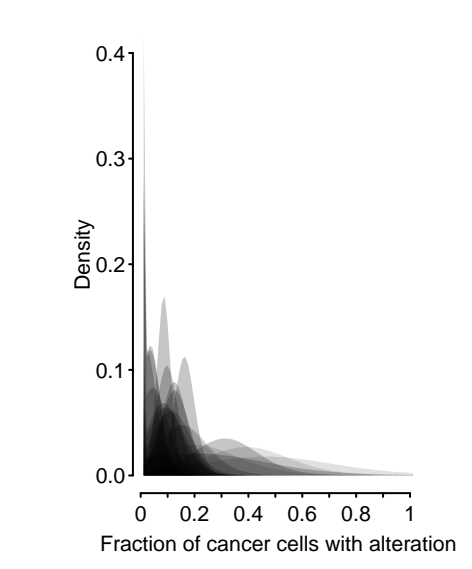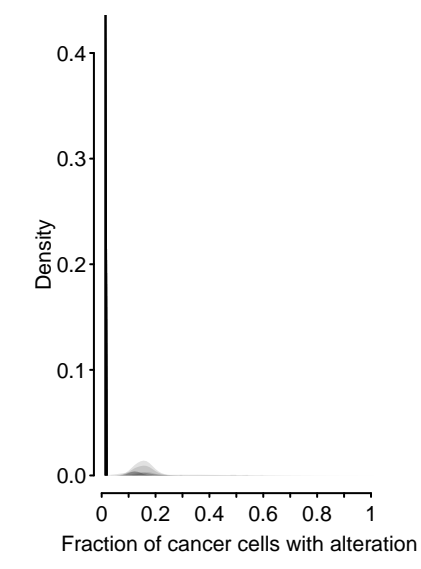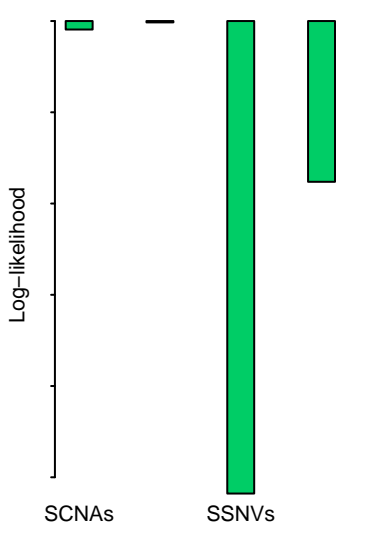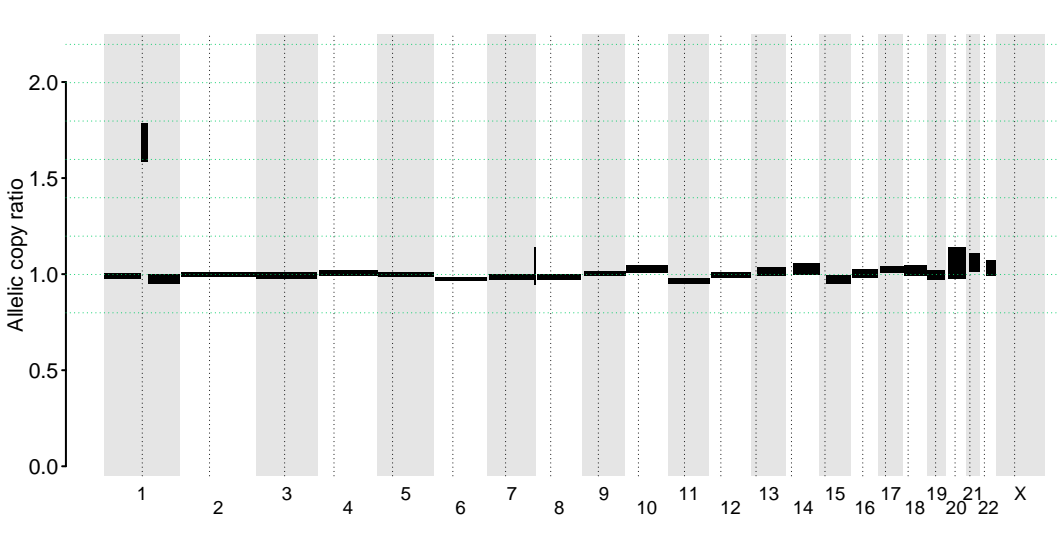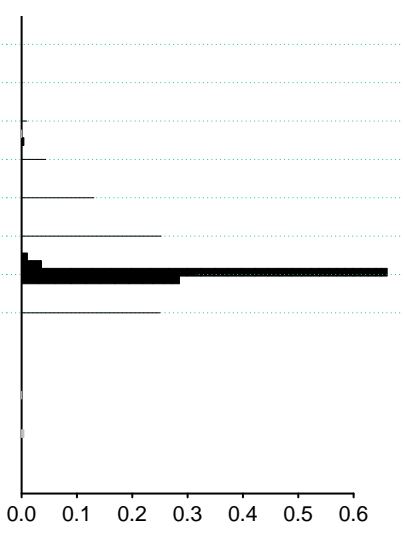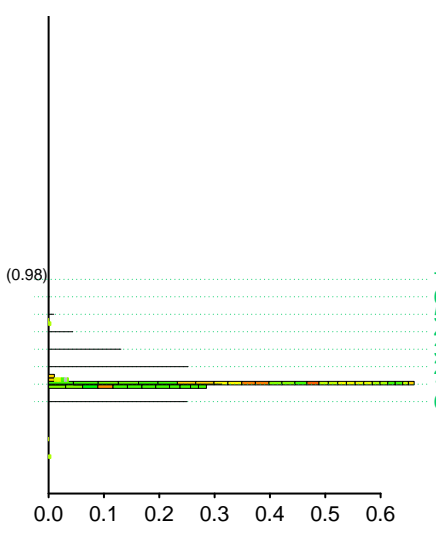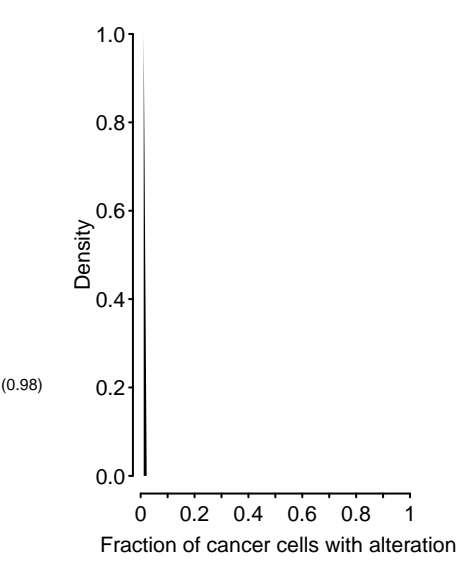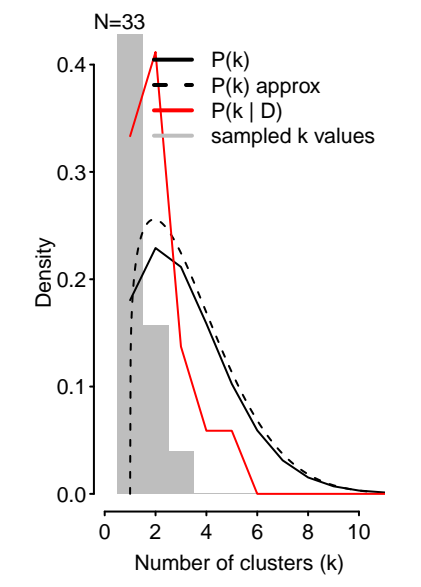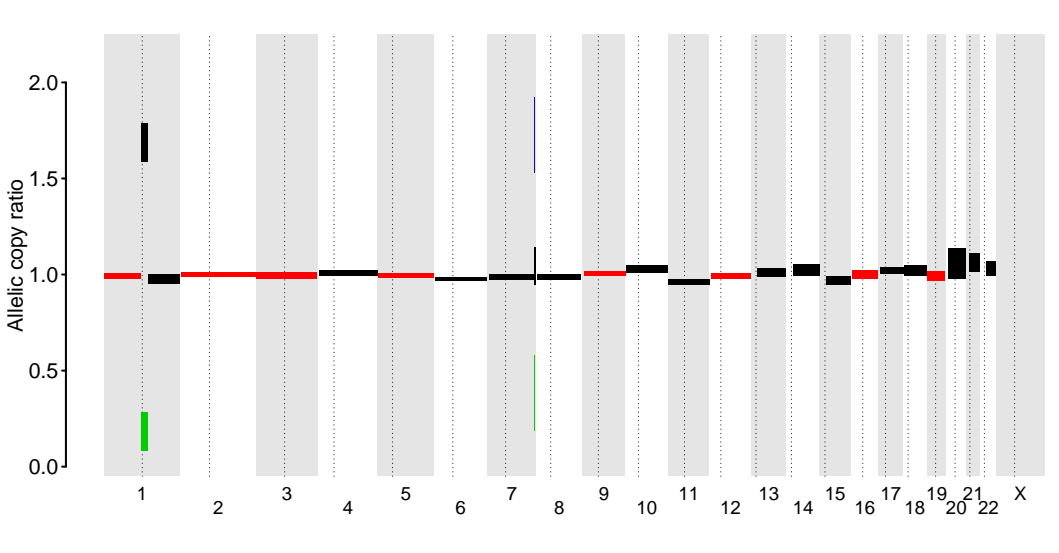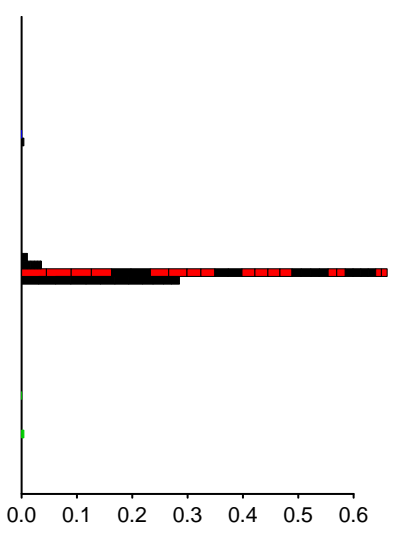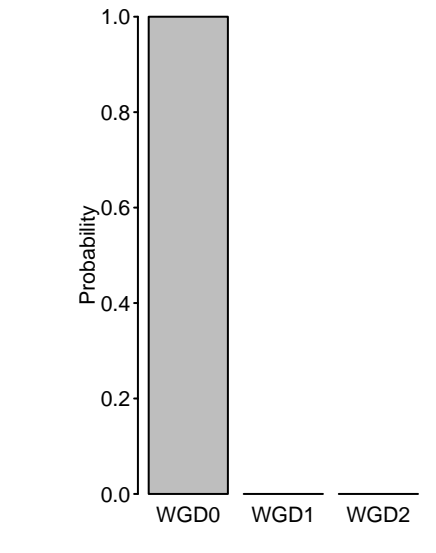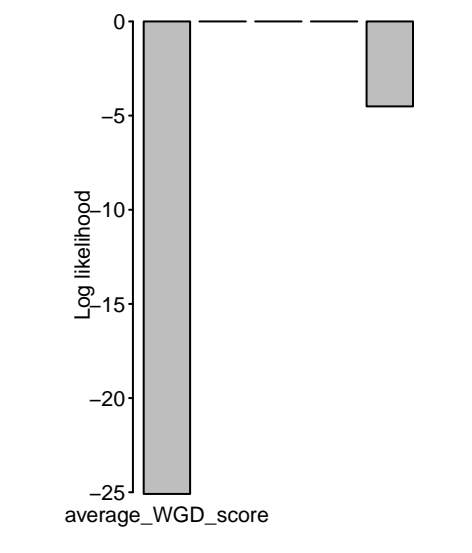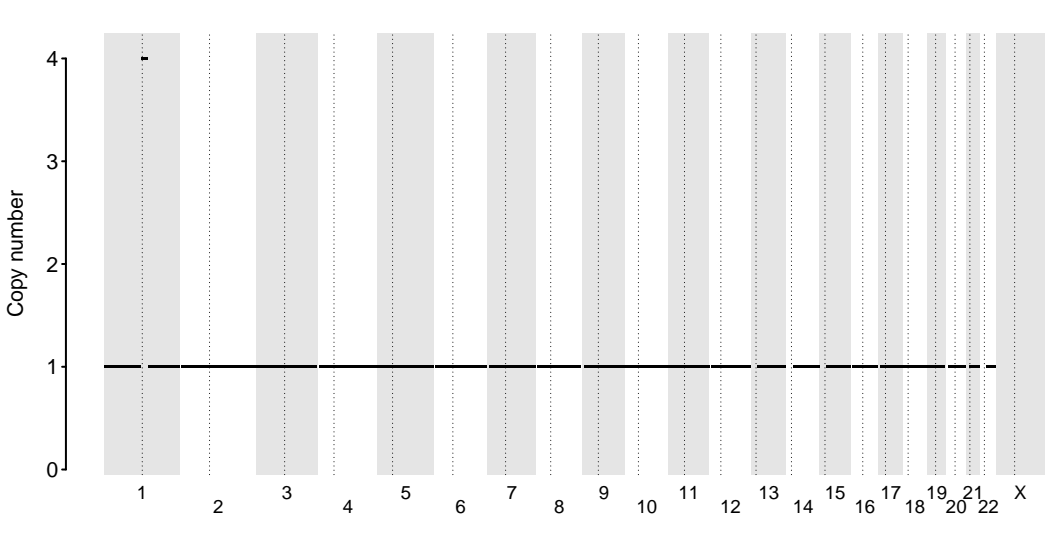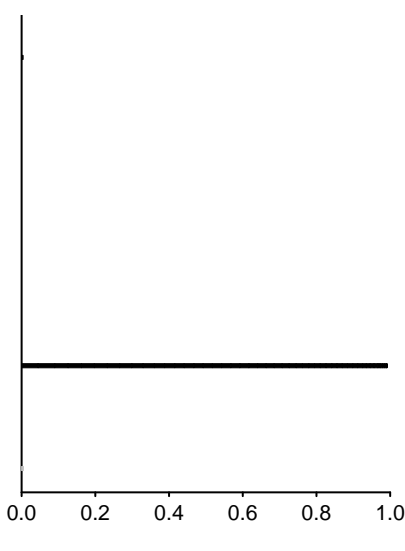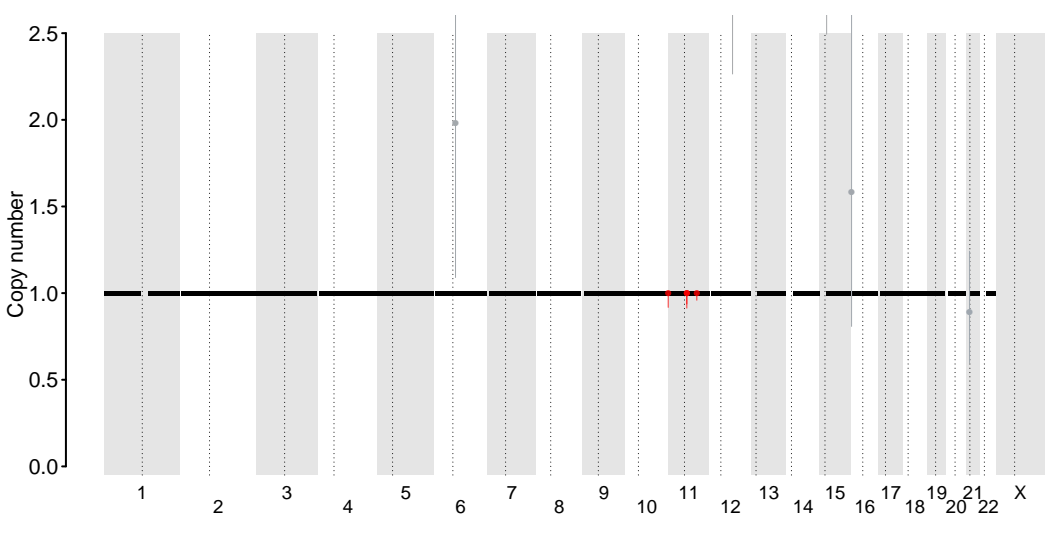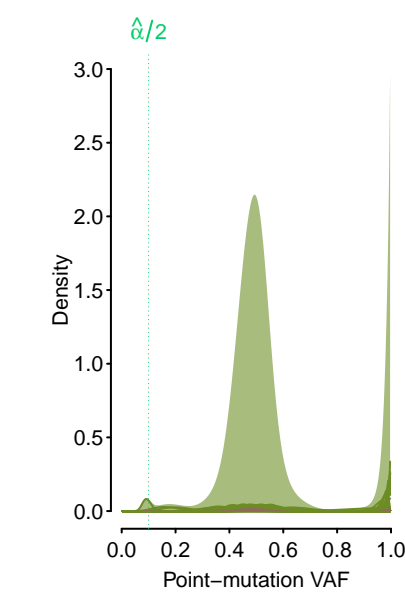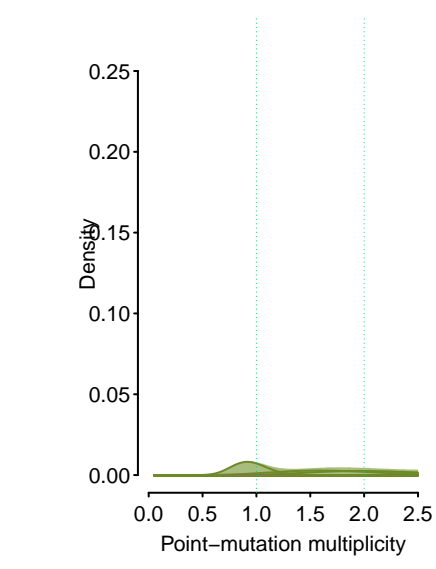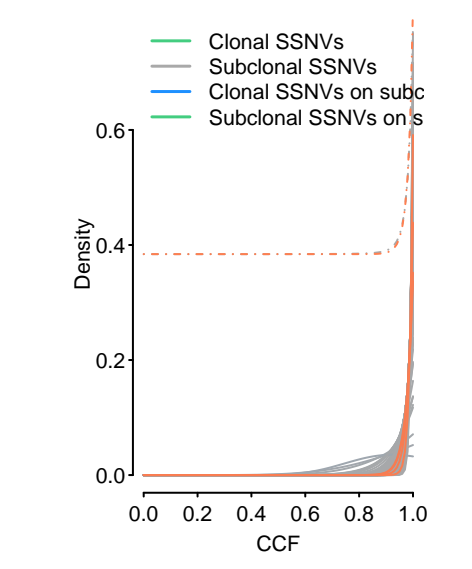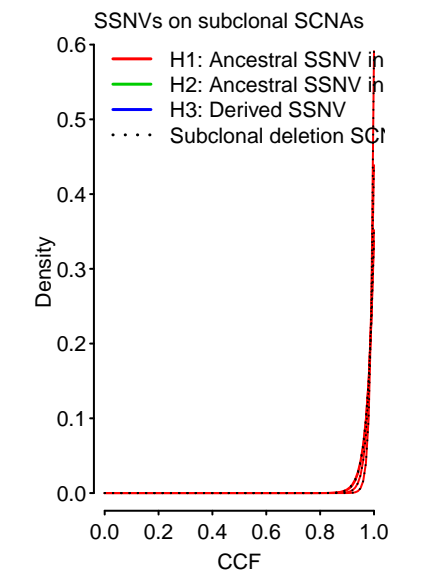



Sample 31

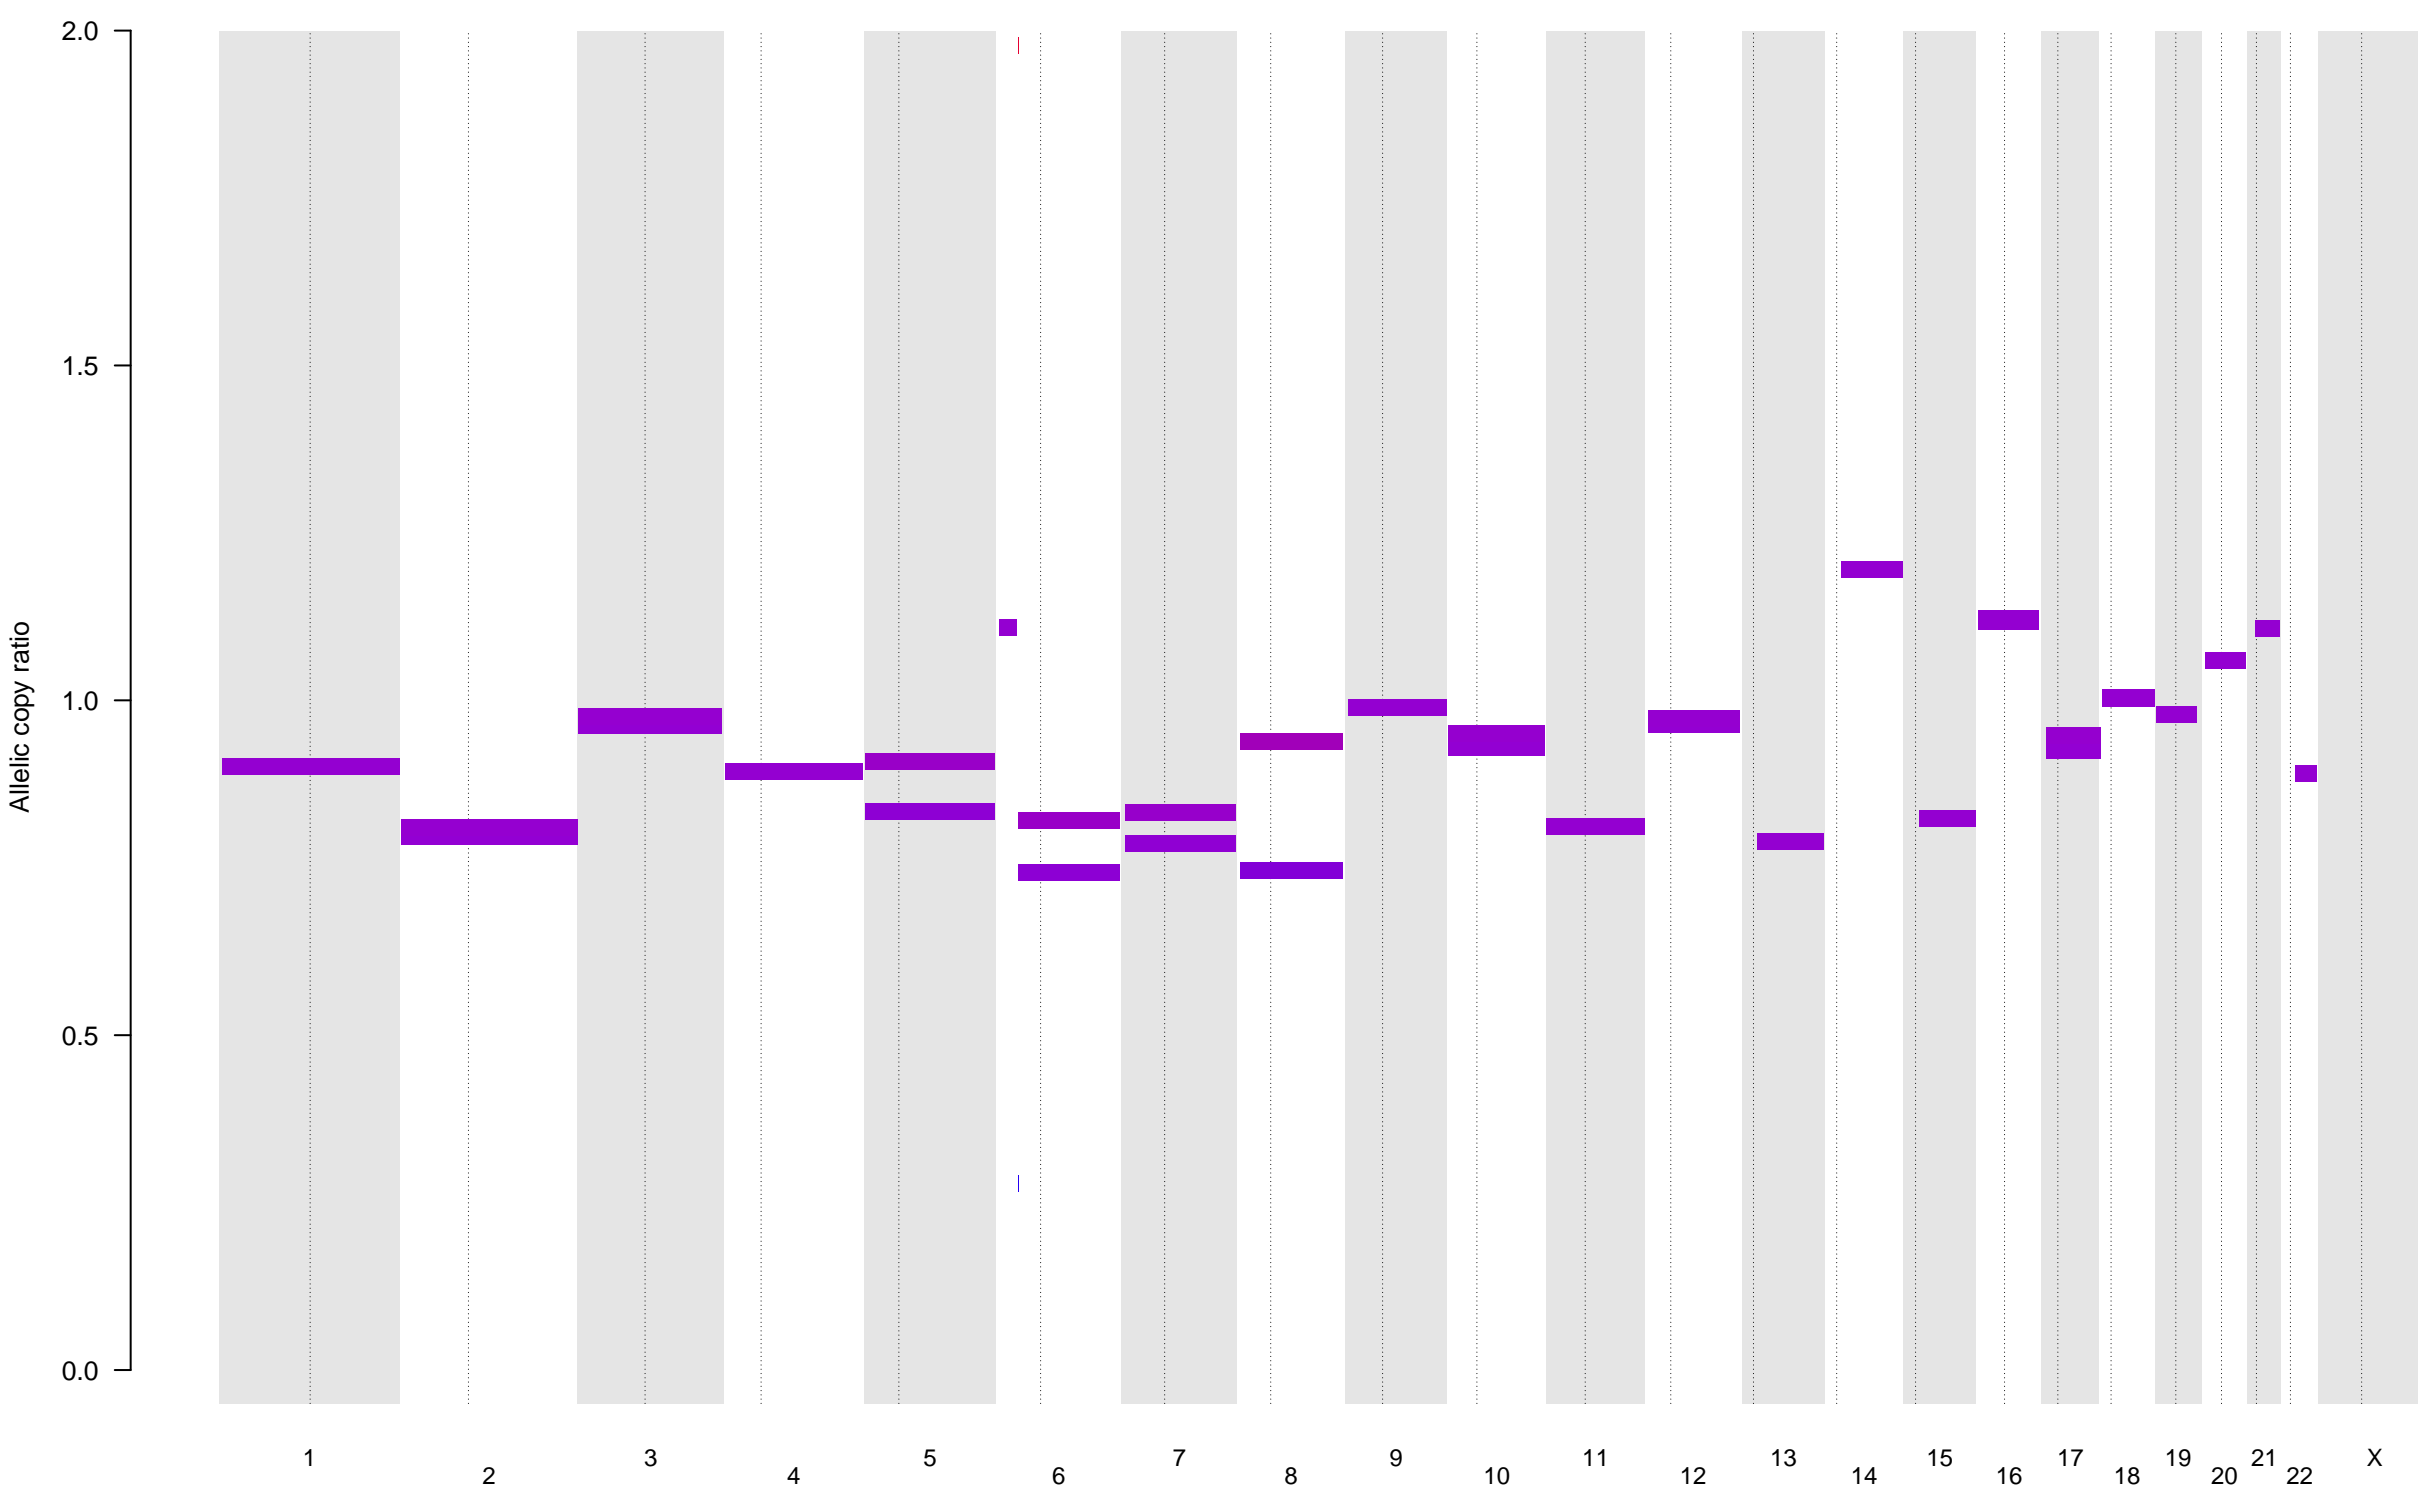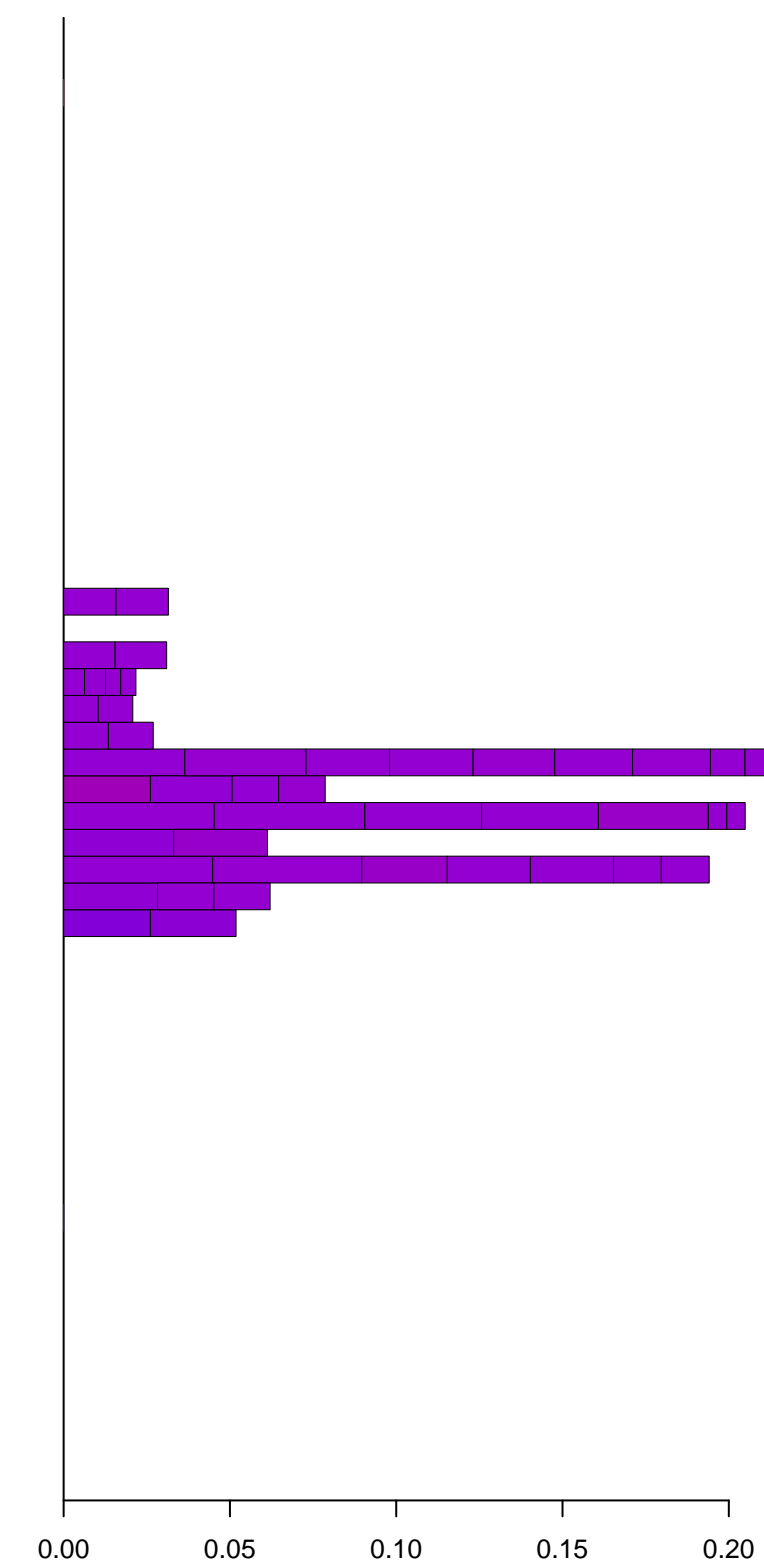

purity( $\hat{\alpha}$ ) = 0.16, ploidy:  $\hat{t} = 2.64$ ,  $\hat{t}_g = 1.49$   
 $\theta_z = 0$ ,  $\theta_0 = 1.473$ , WGD=0  
 SCNA LL = -181.33, SSNV LL = -5163.32, SCNA Ev = -85.21526

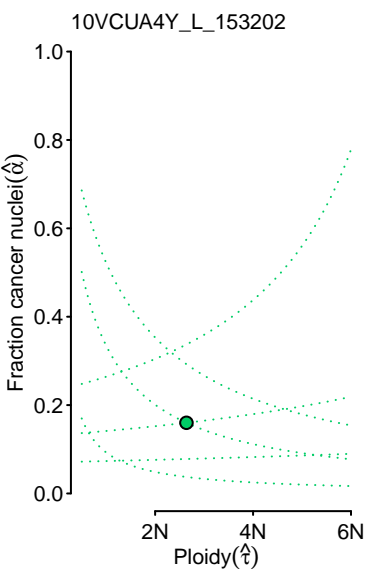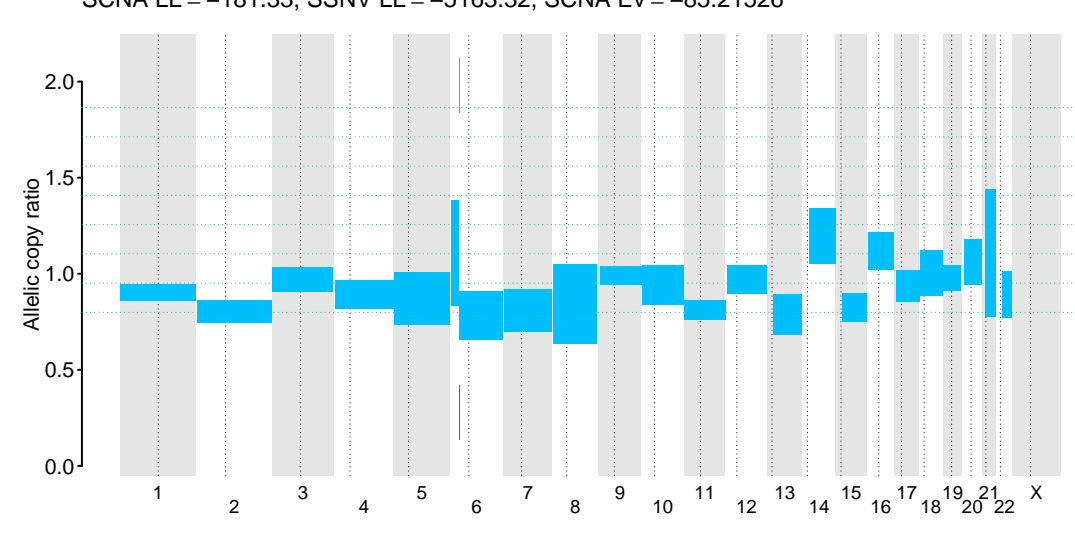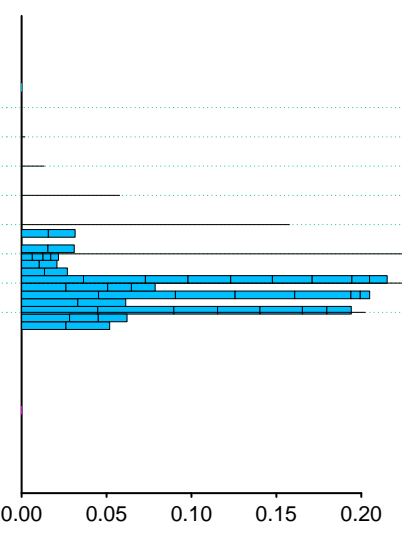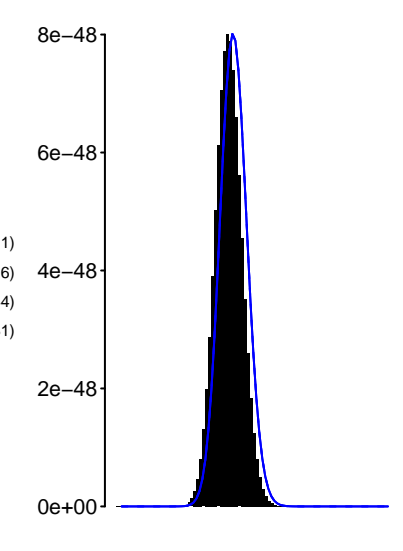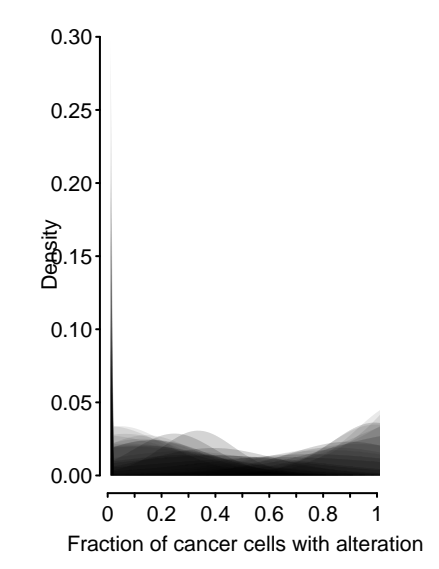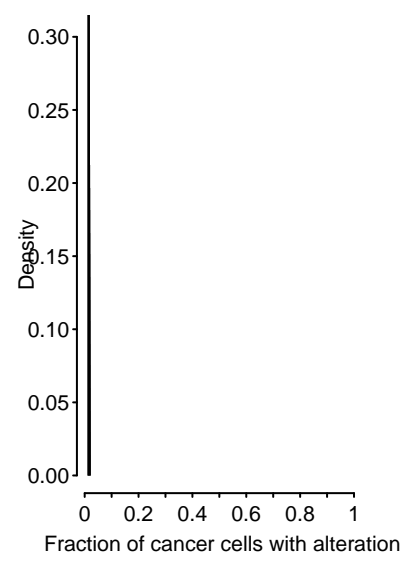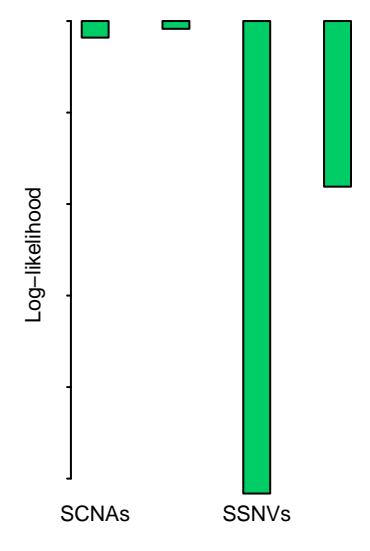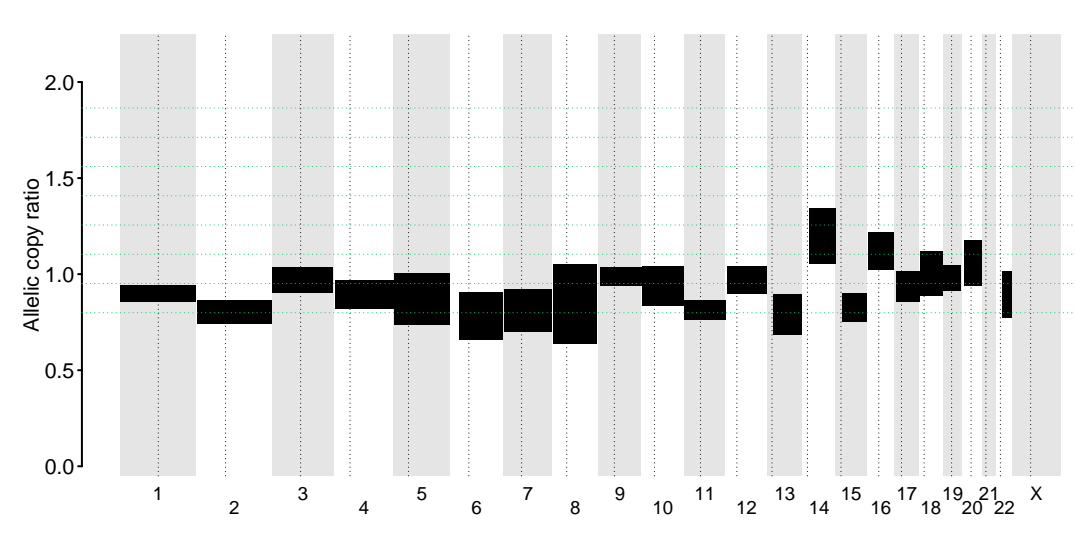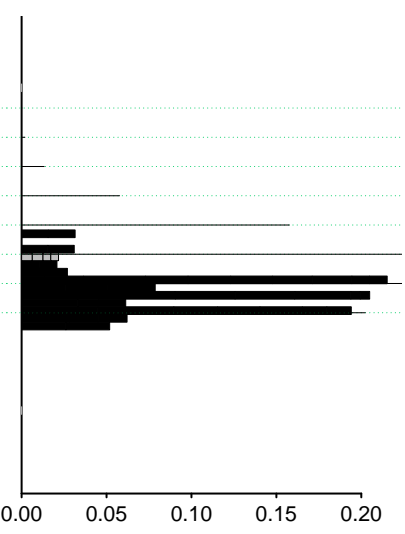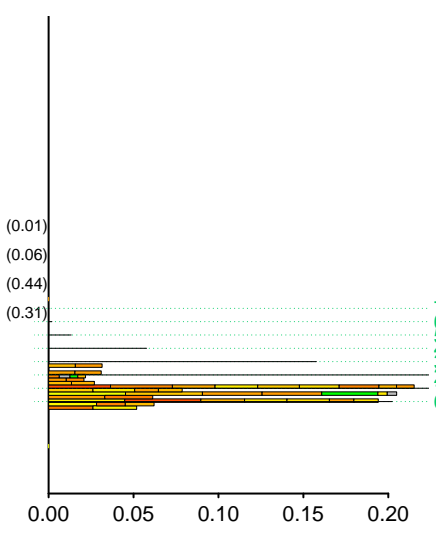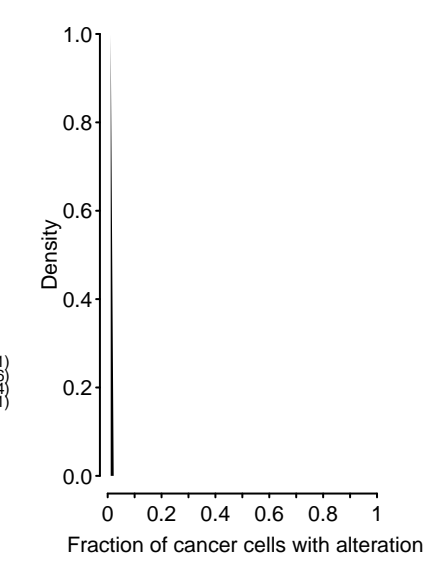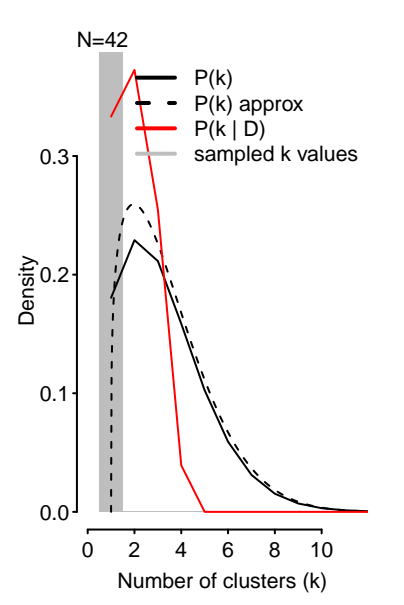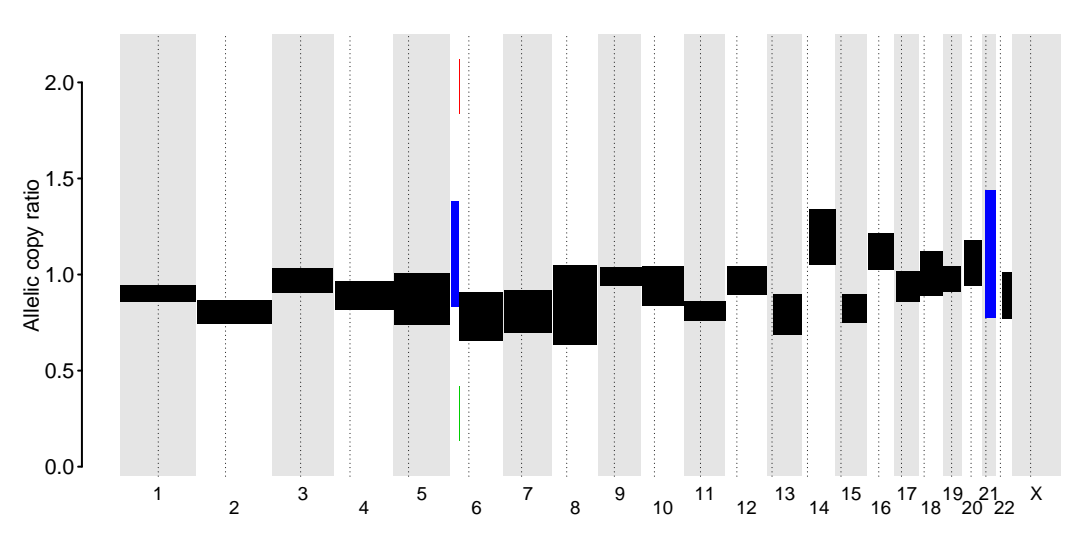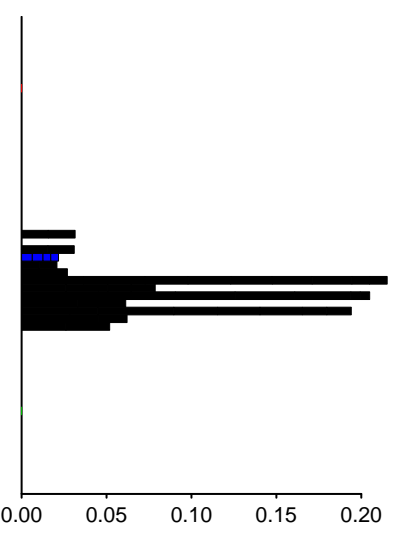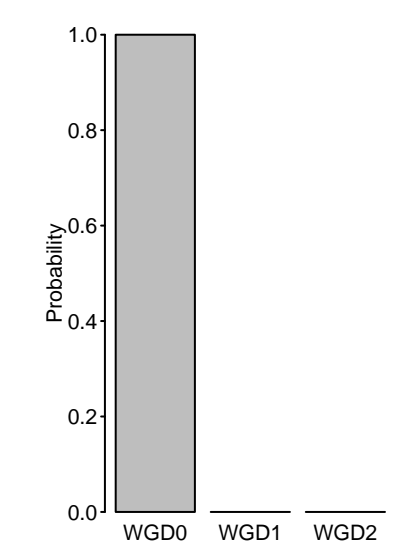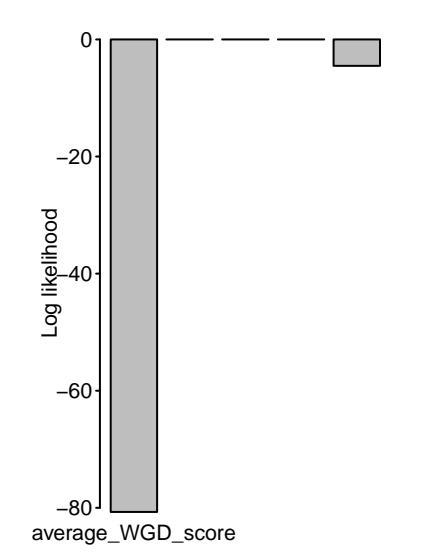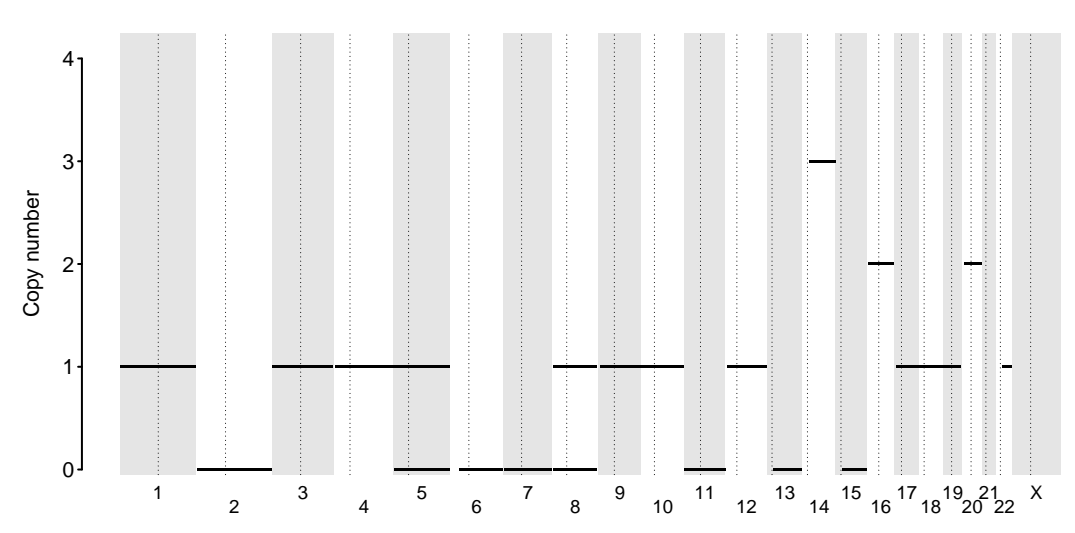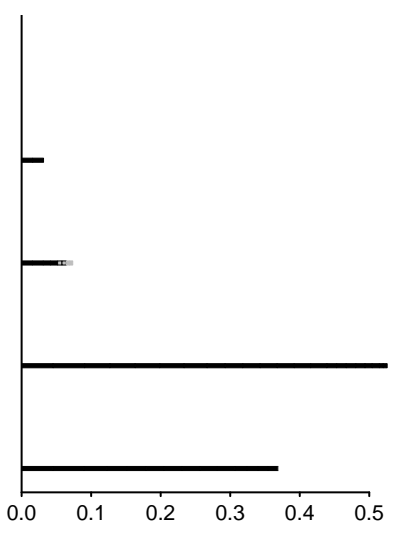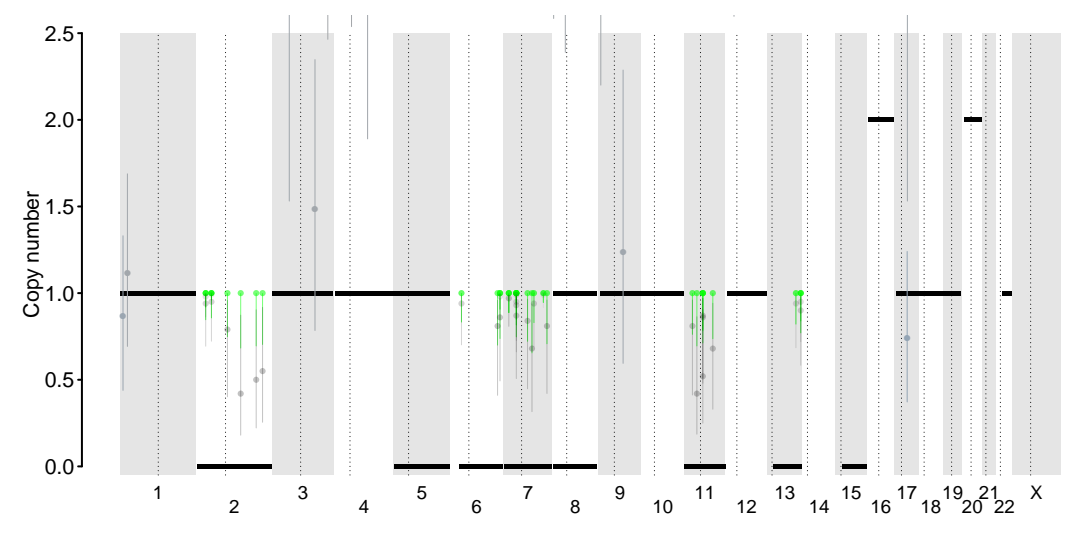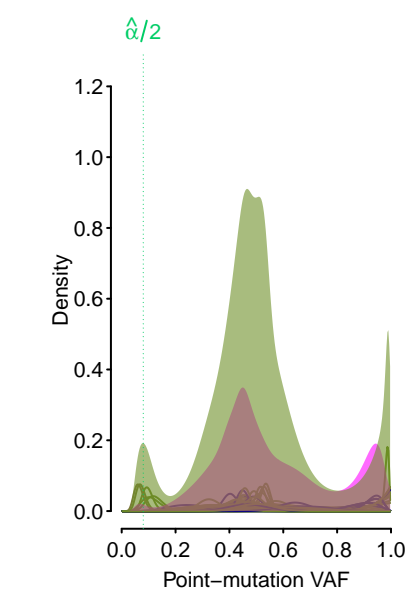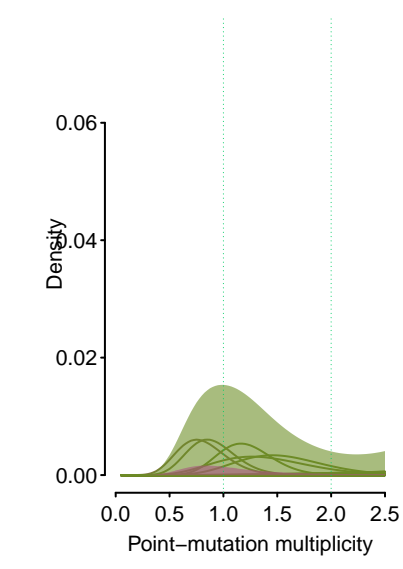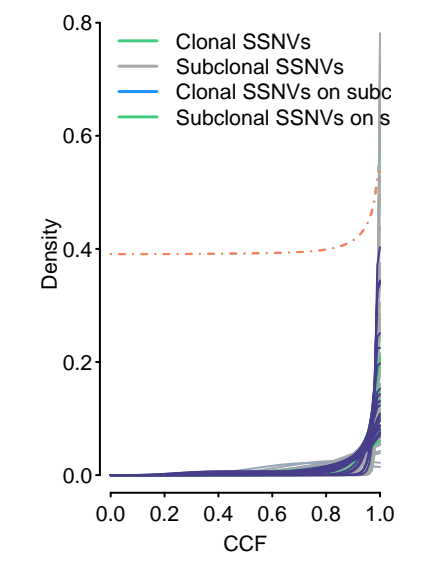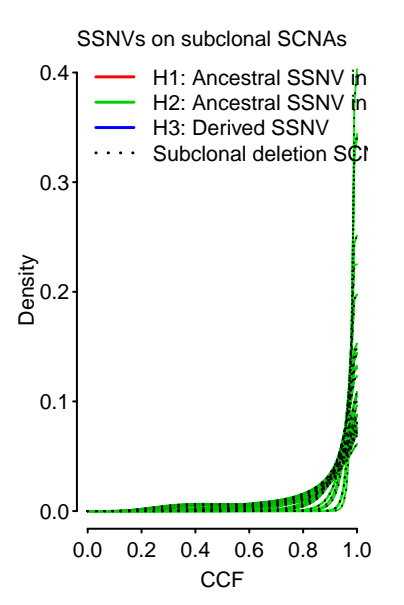

Sample 32

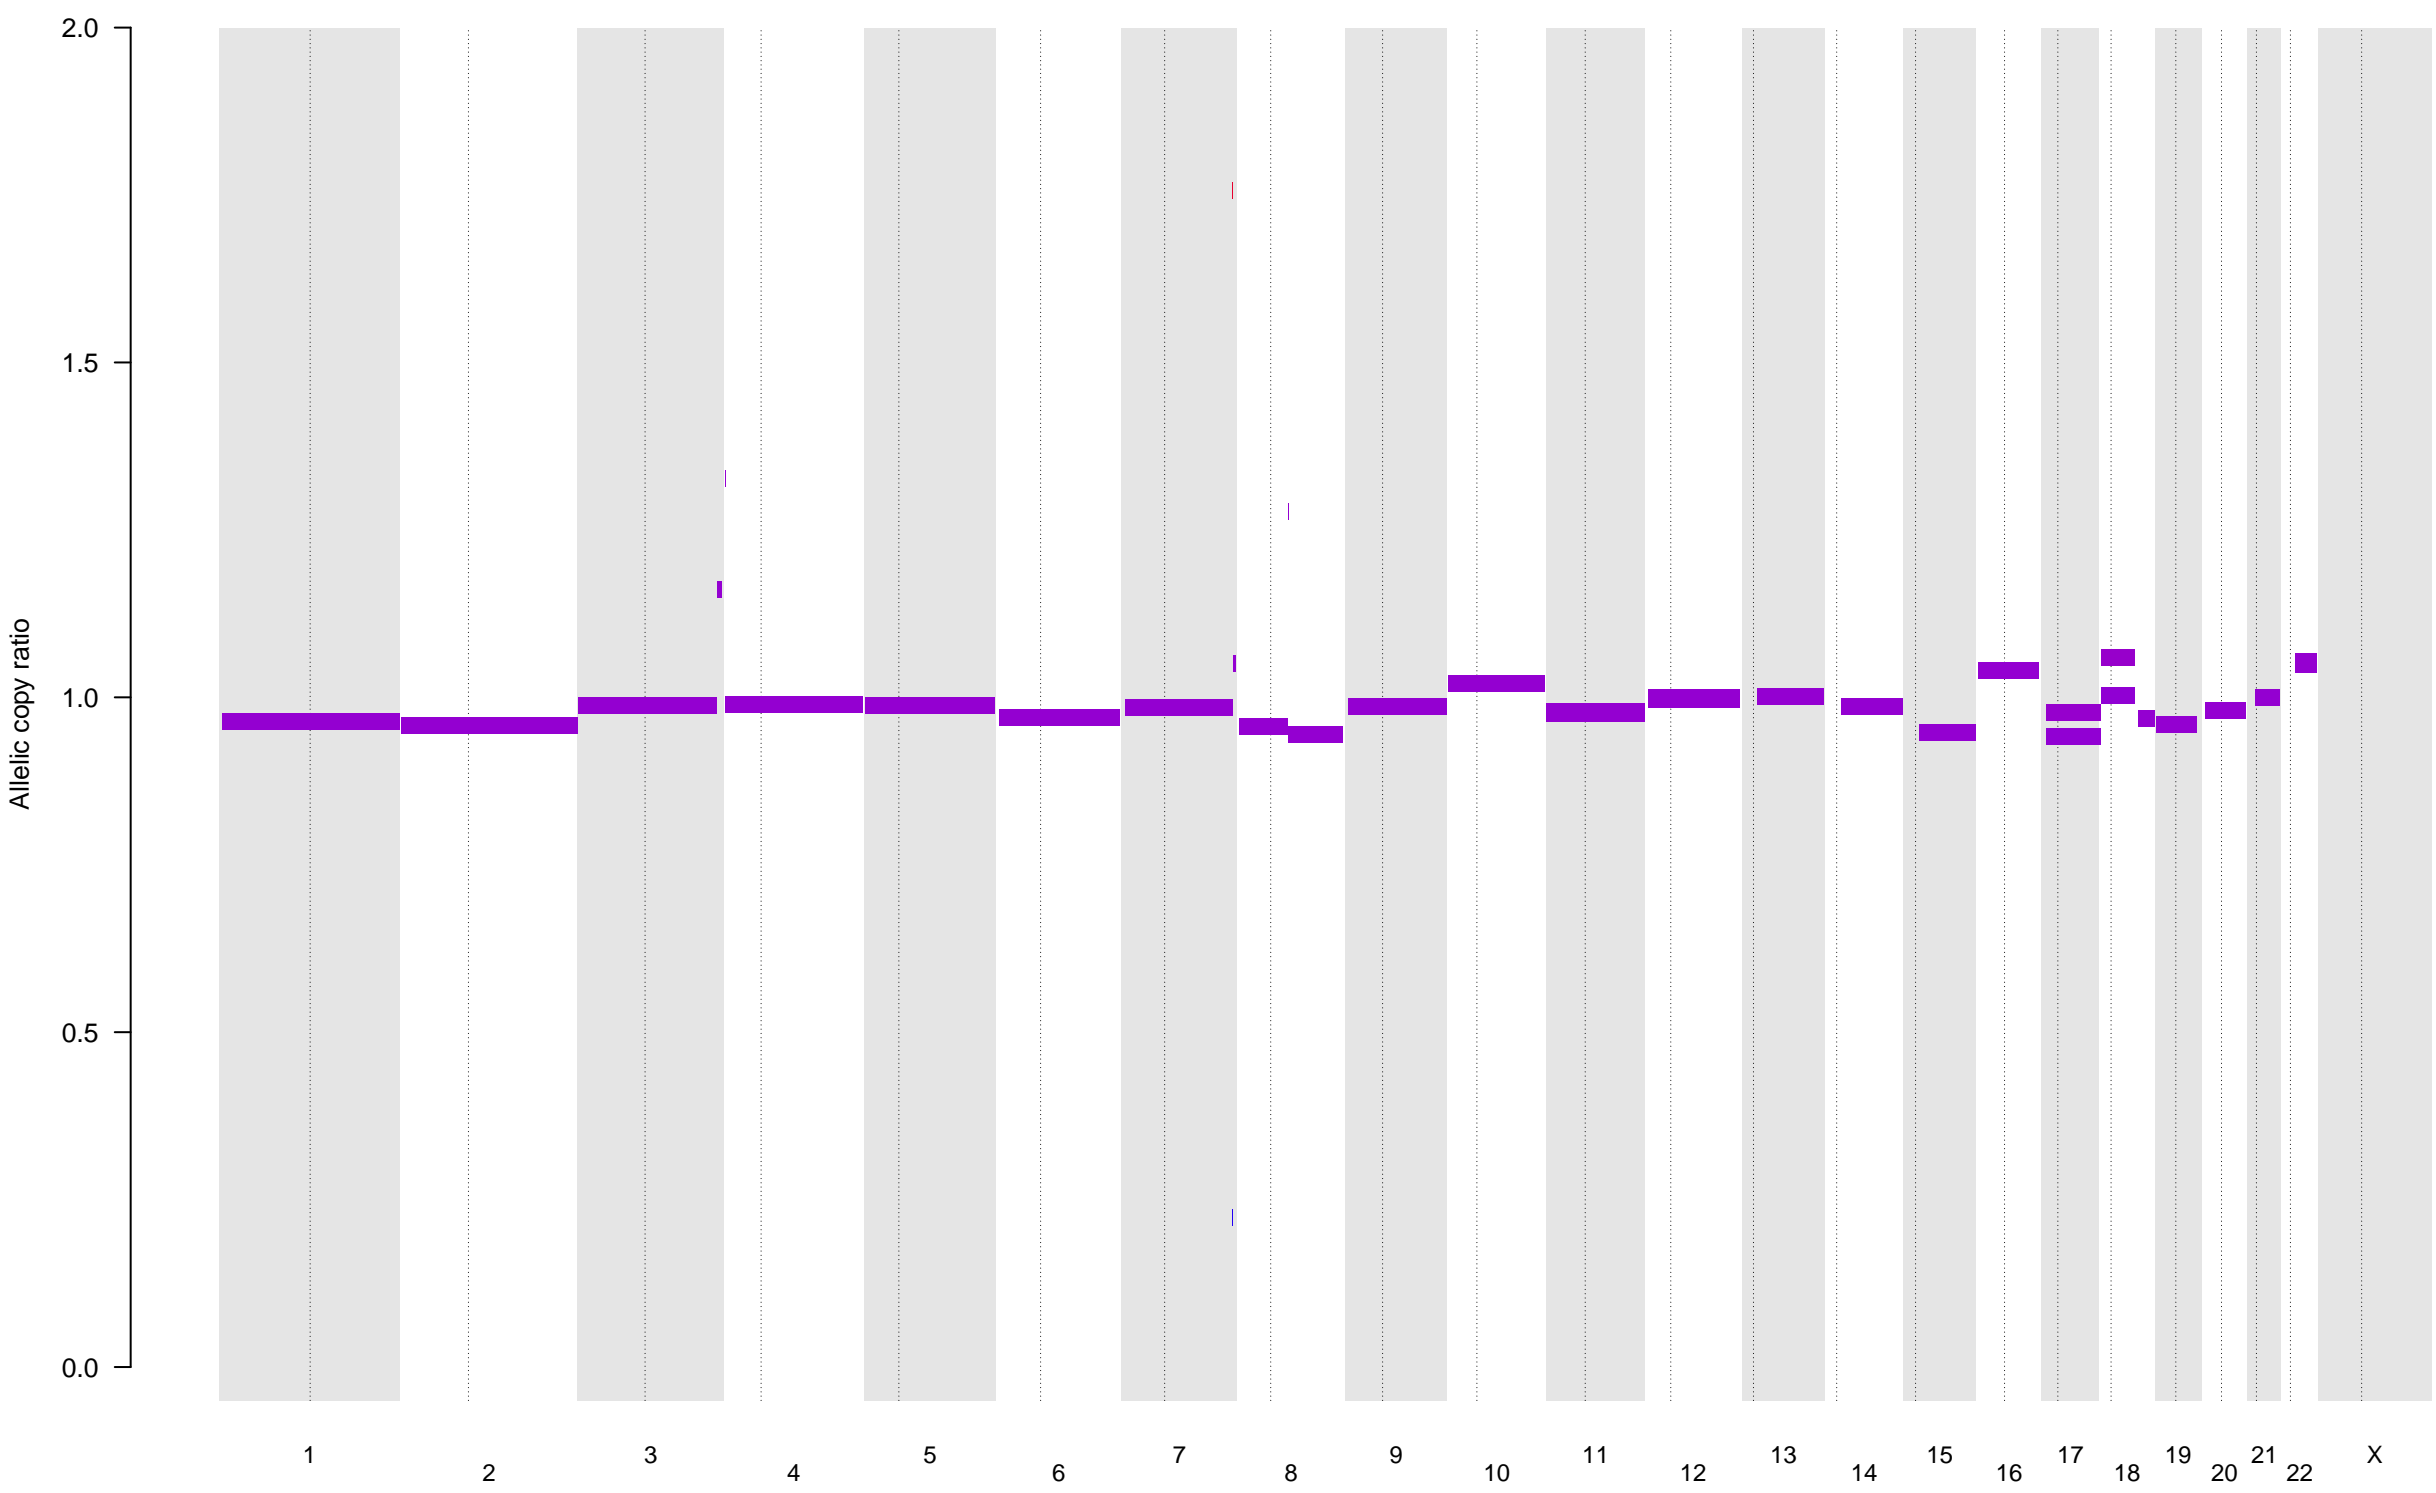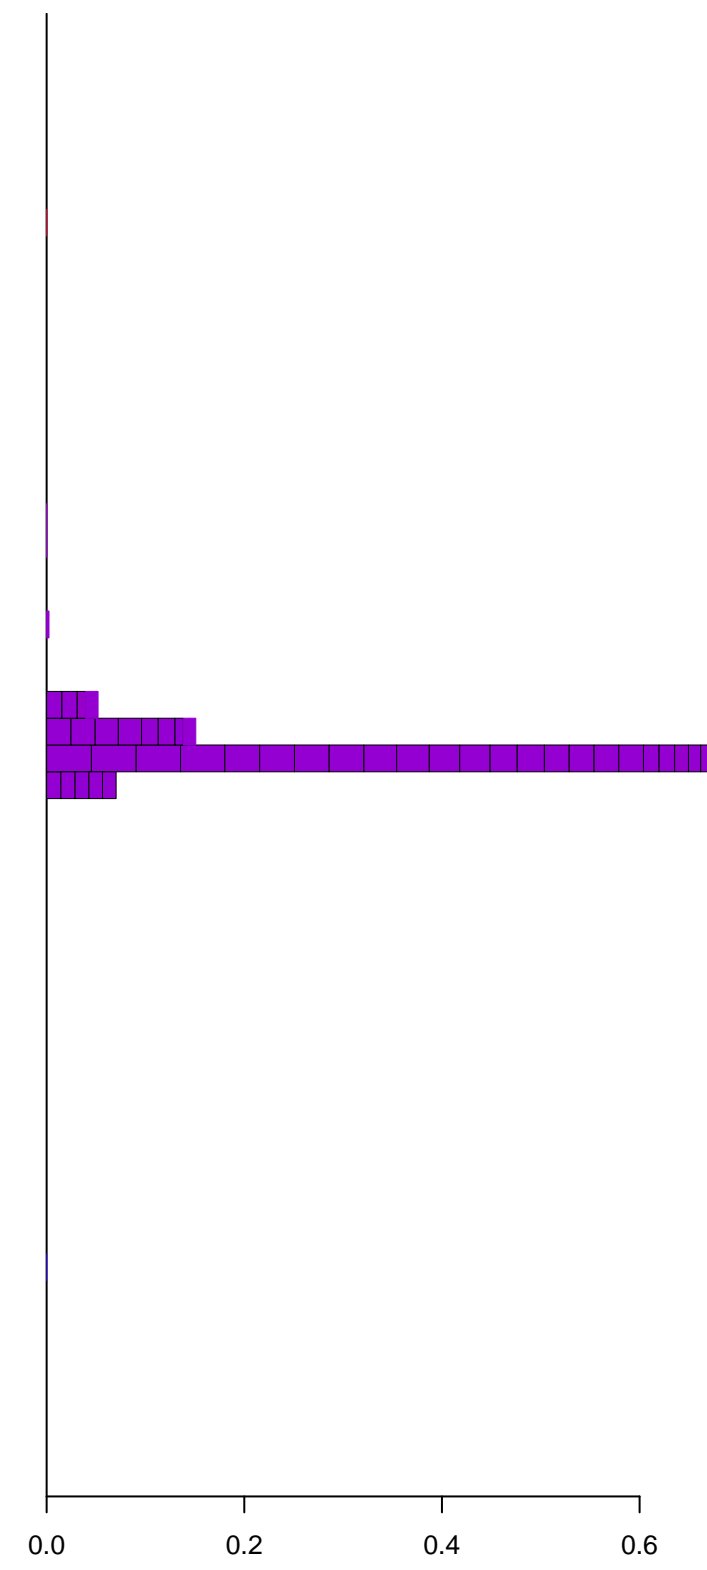

purity( $\hat{\alpha}$ ) = 0.19, ploidy:  $\hat{t} = 2.22$ ,  $\hat{t}_g = 2.01$   
 $\theta_z = 0$ ,  $\theta_0 = 1.473$ , WGD=0  
 SCNA LL = -211.63, SSNV LL = -6168.01, SCNA Ev = -29.60161

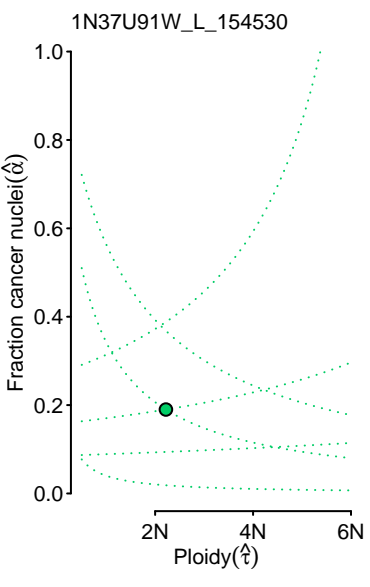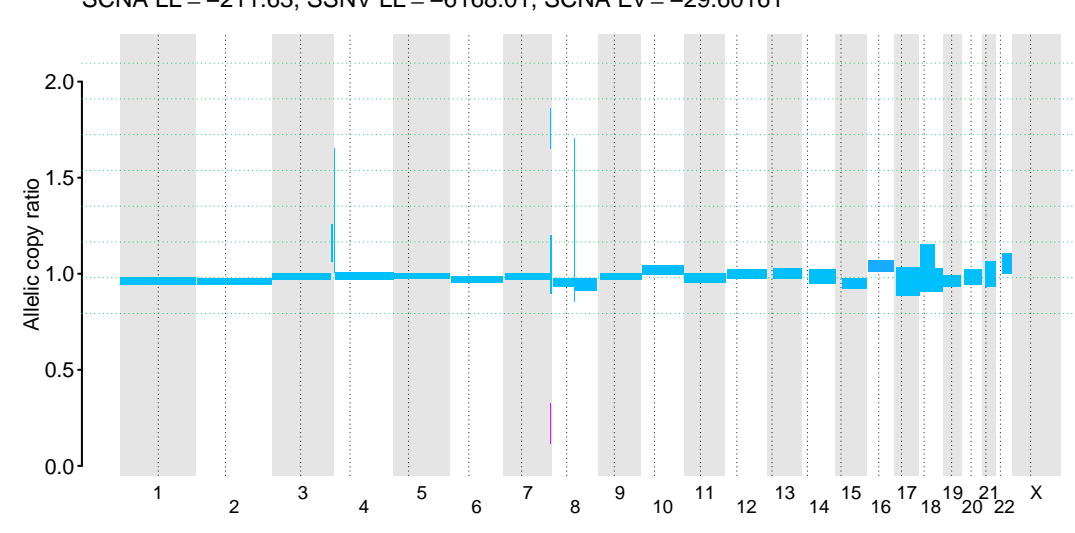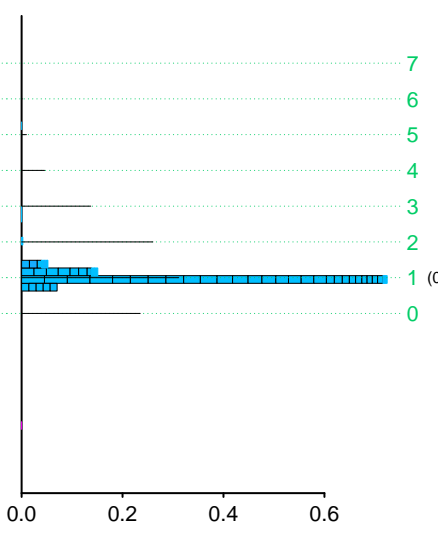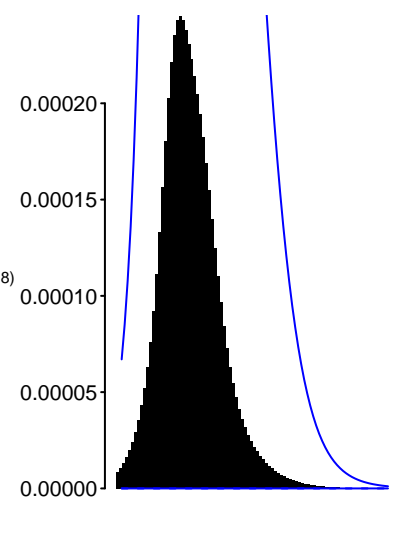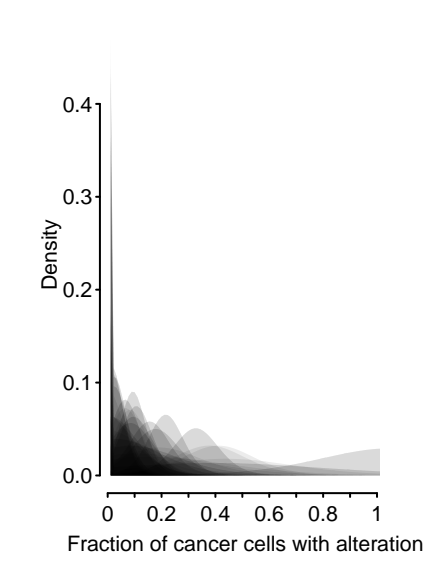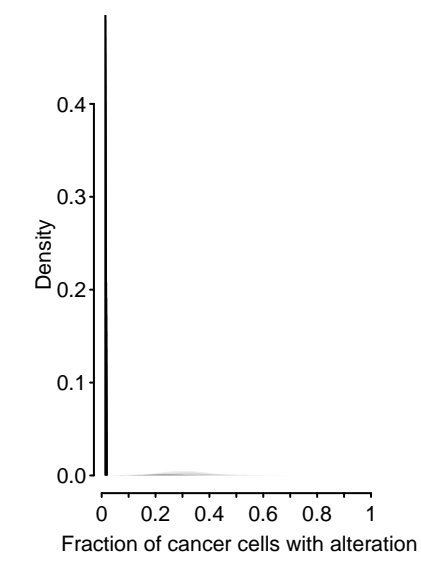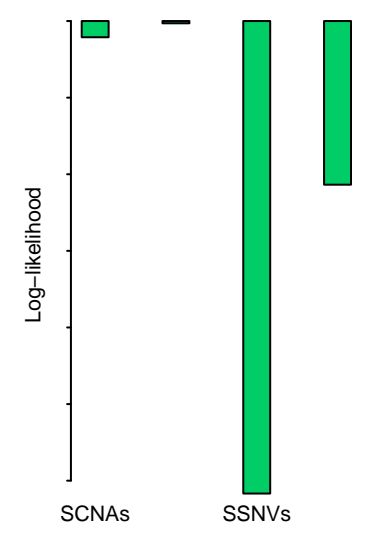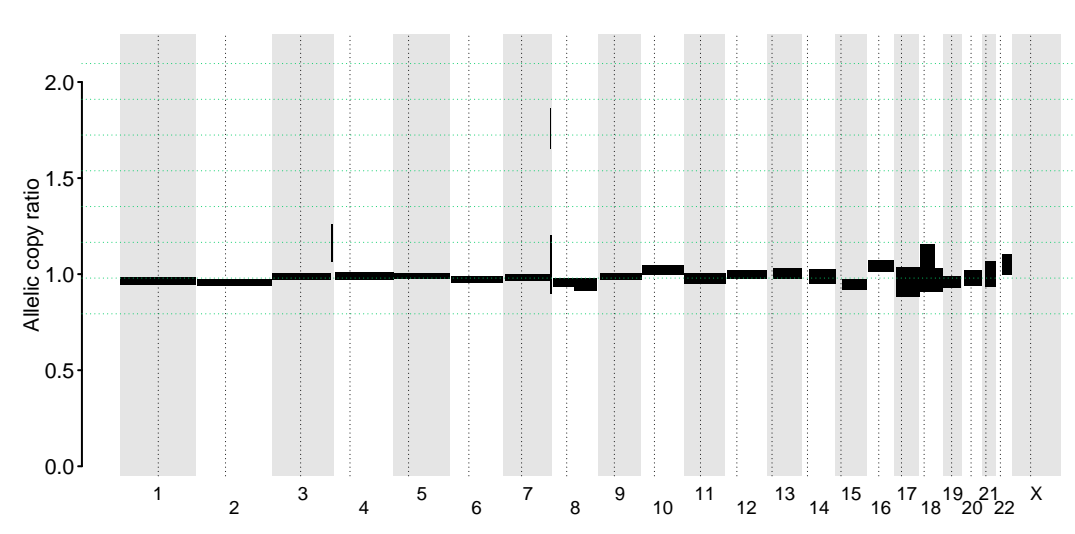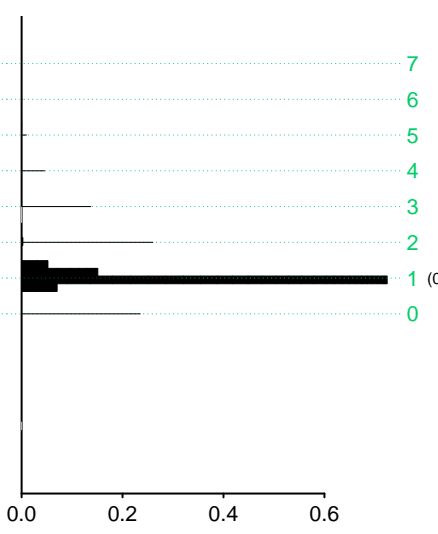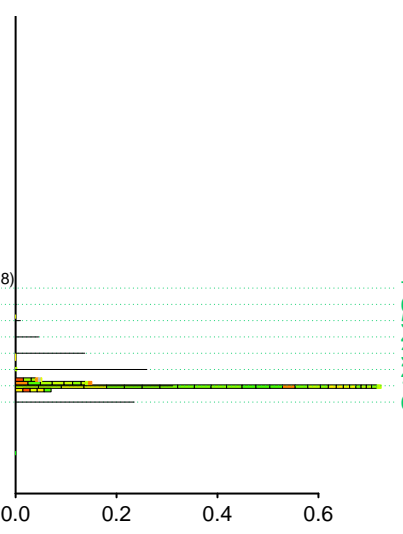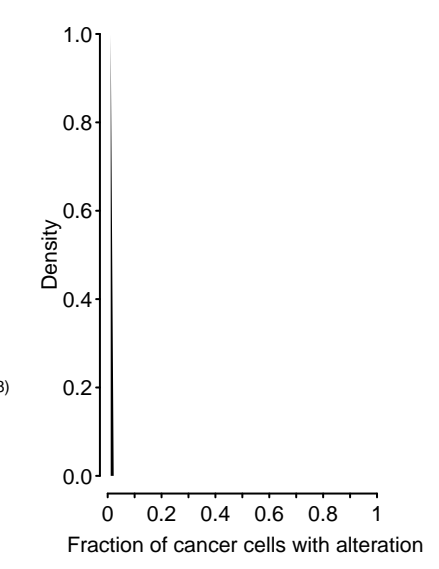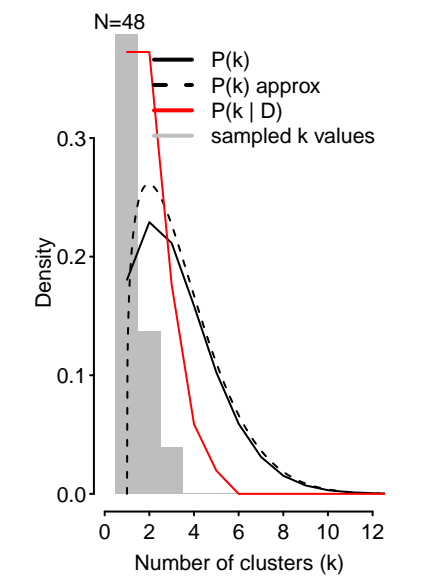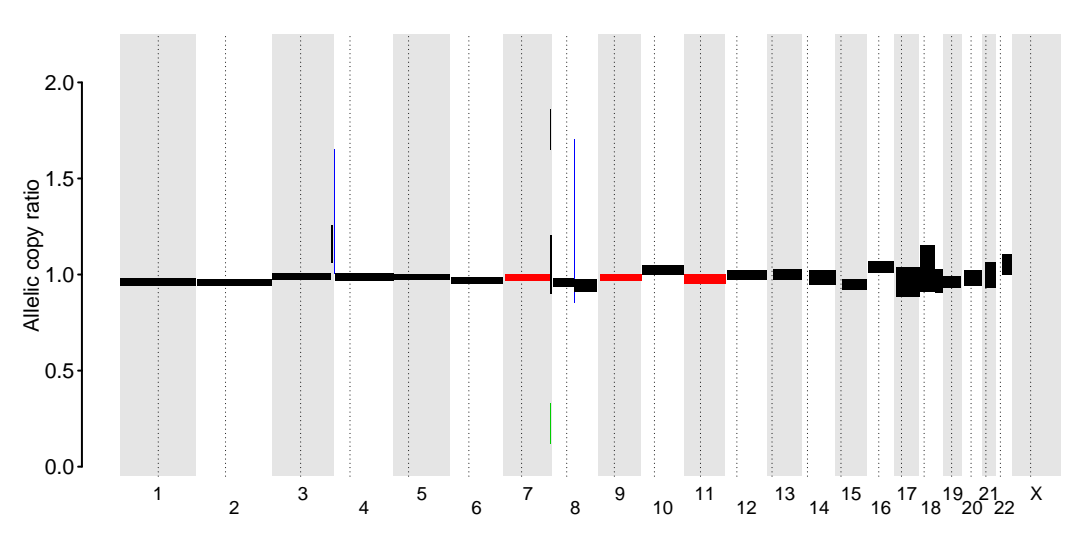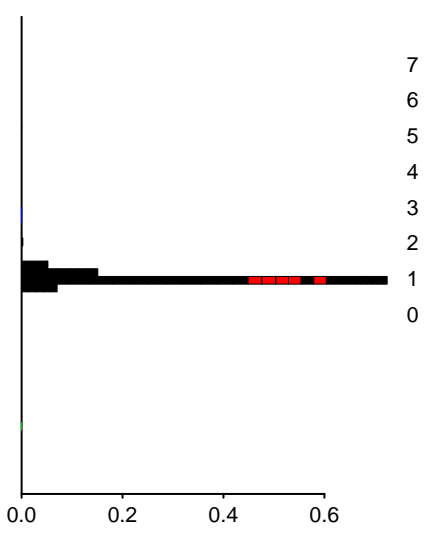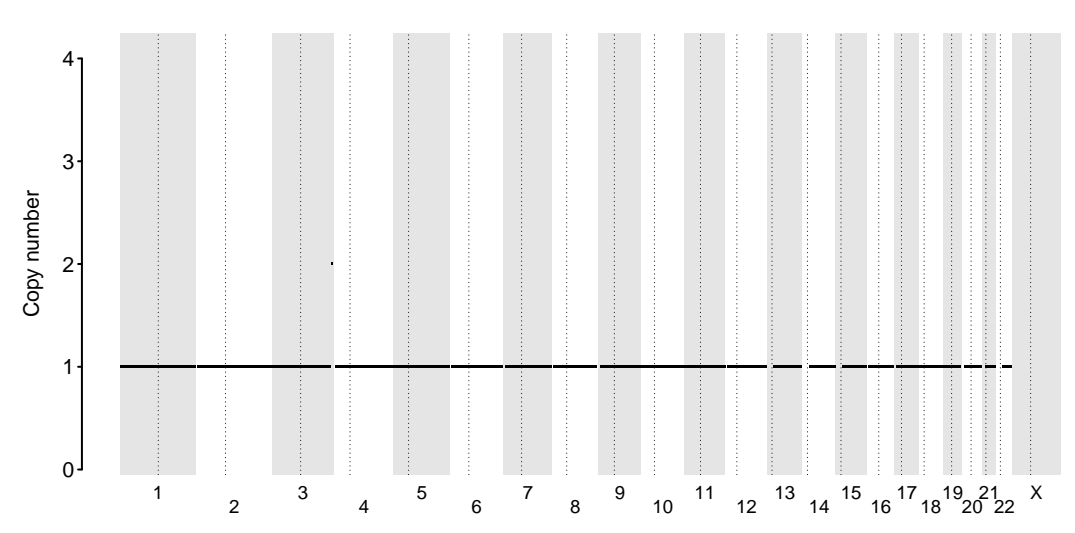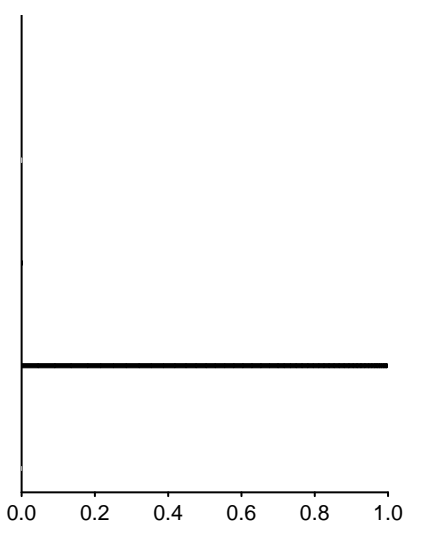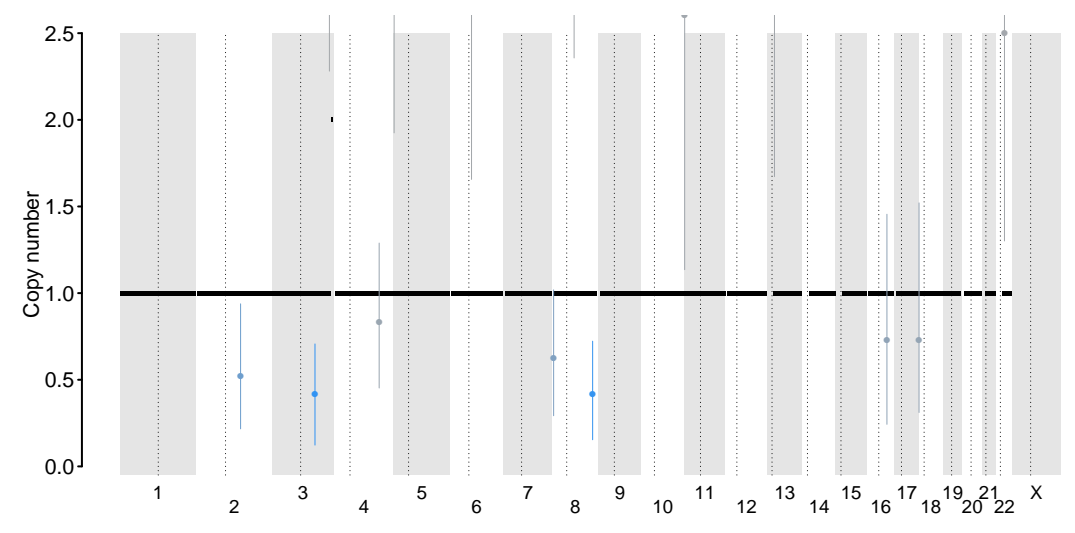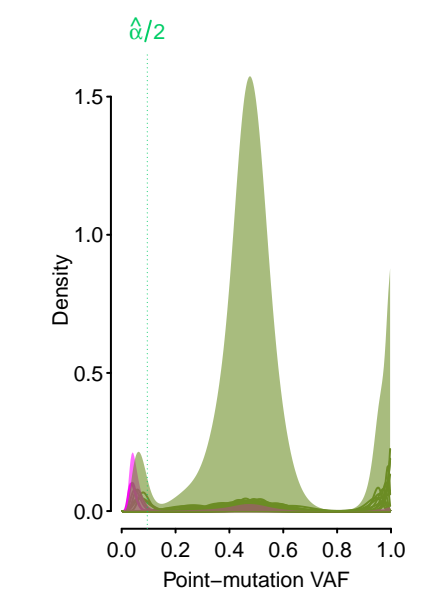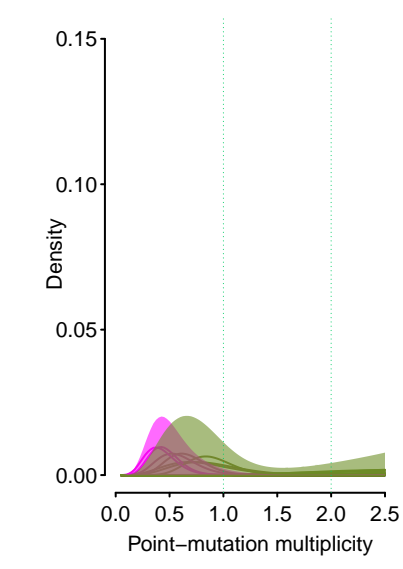

Sample 33

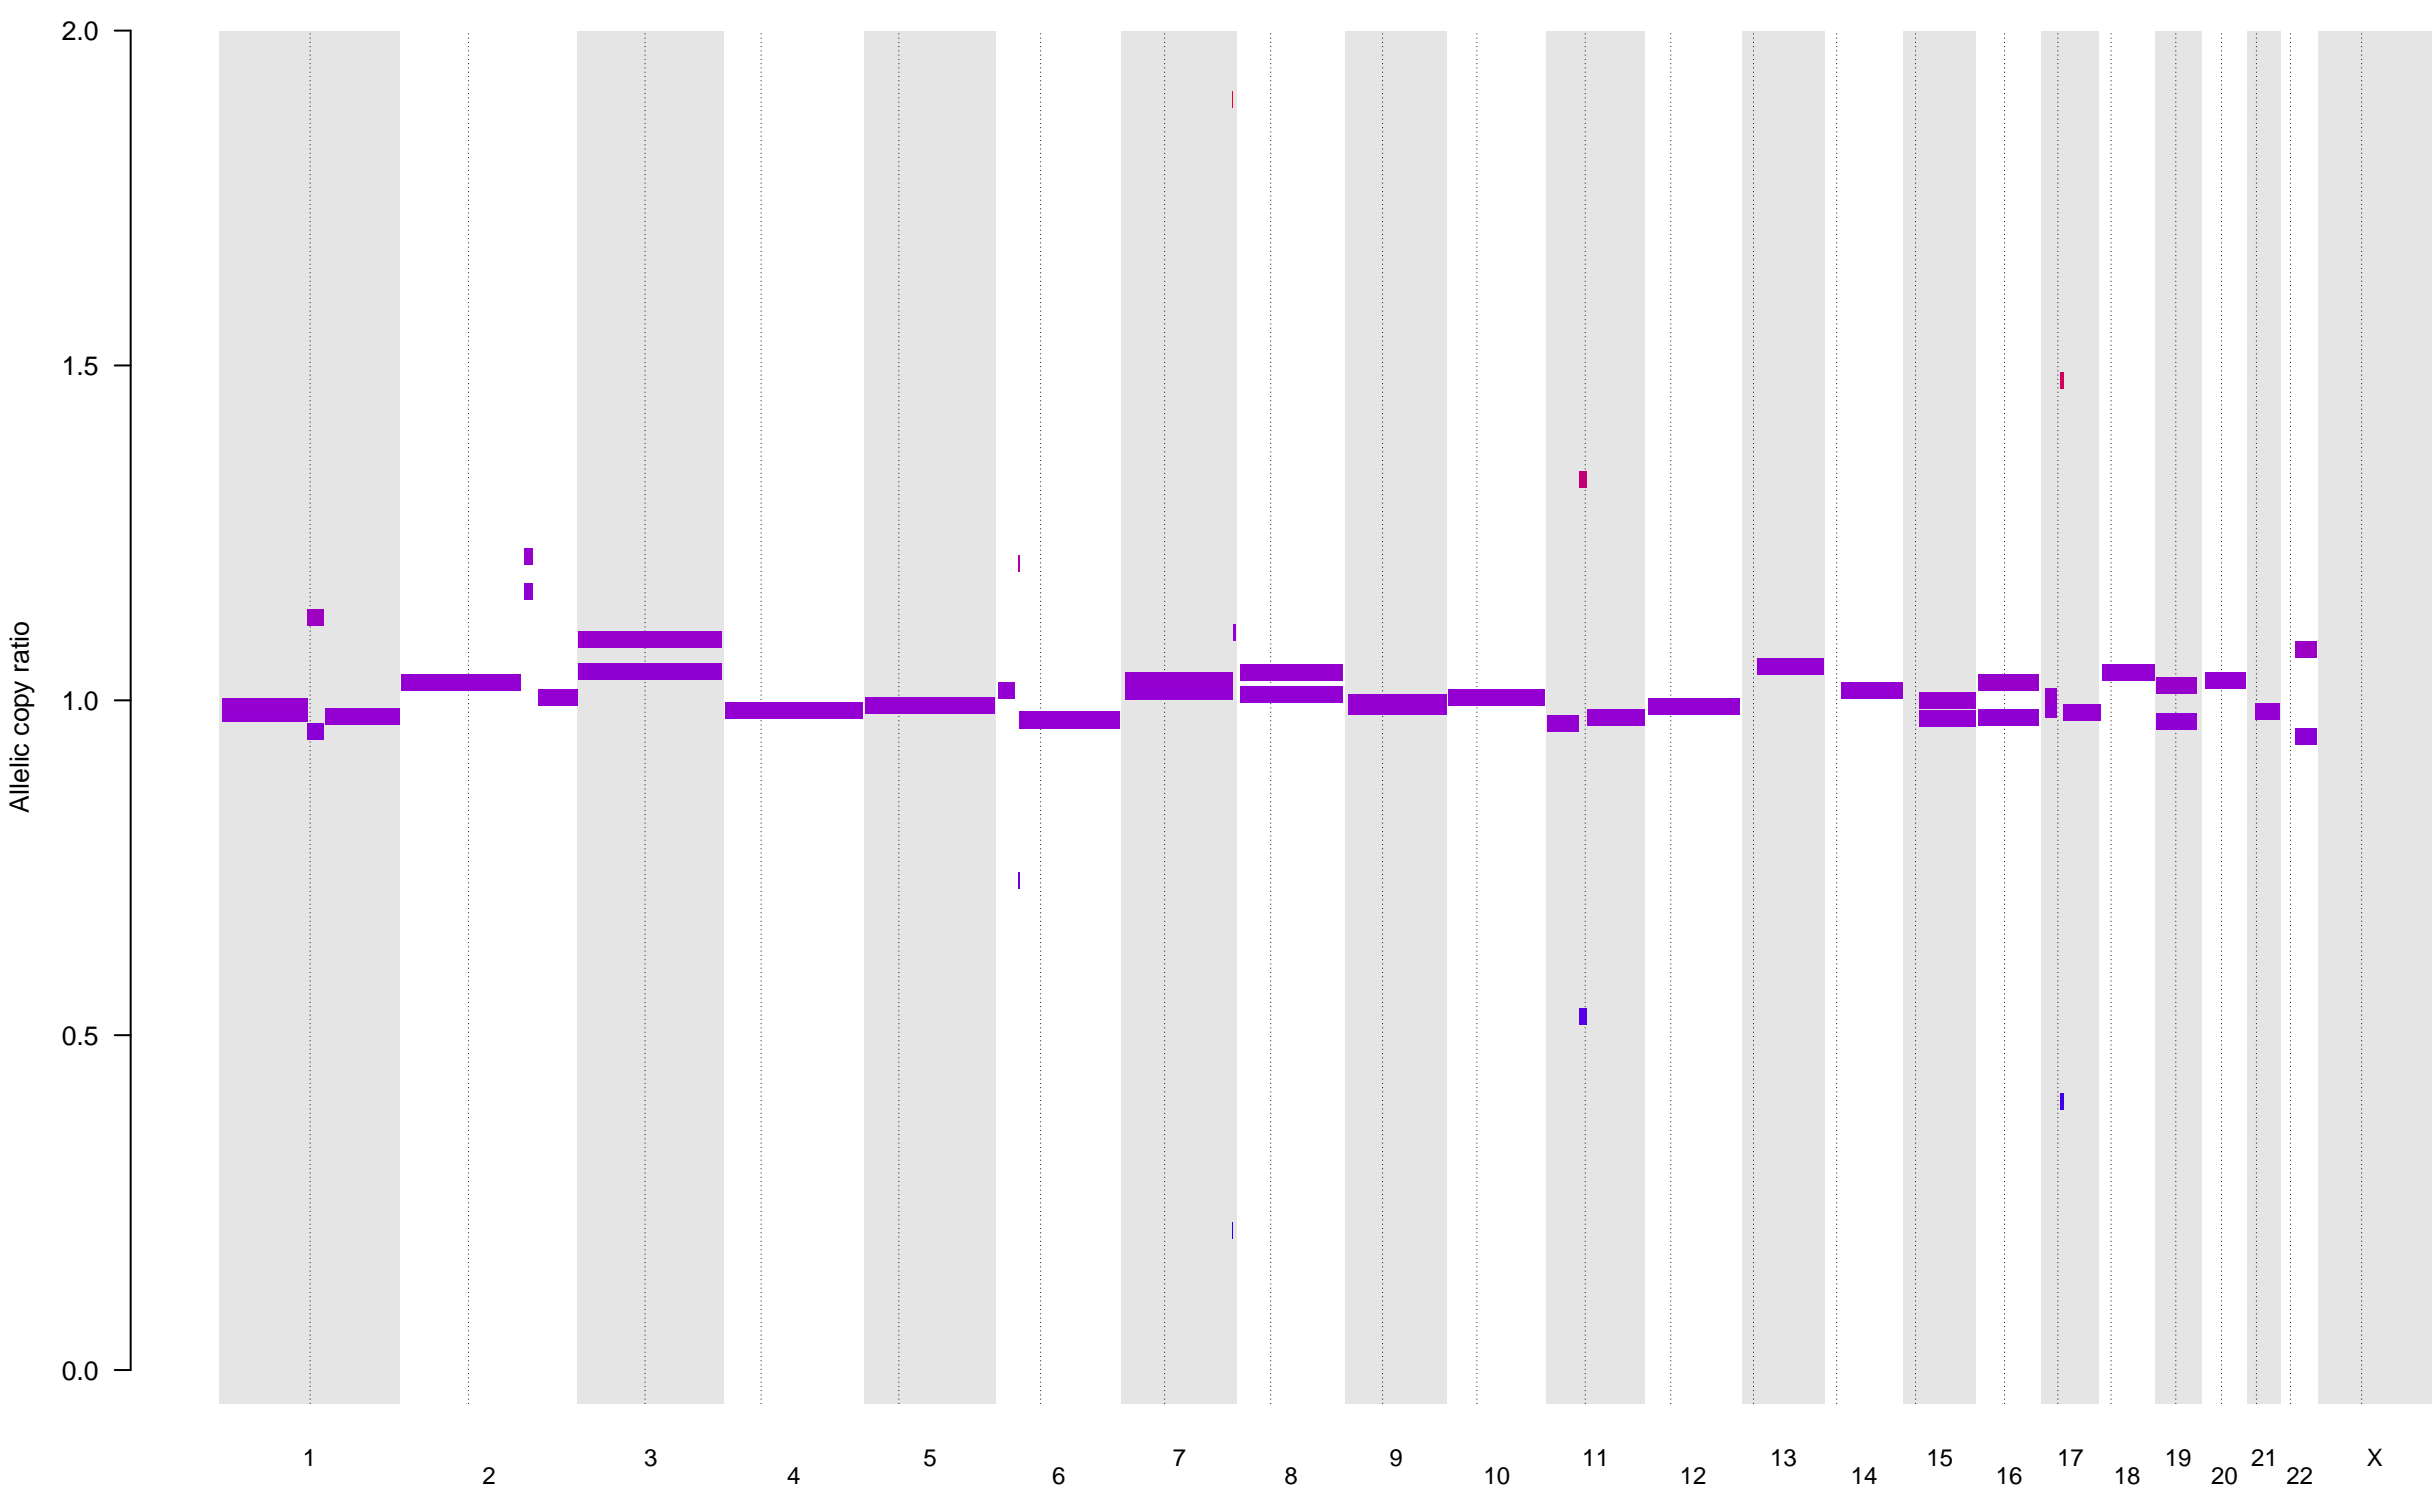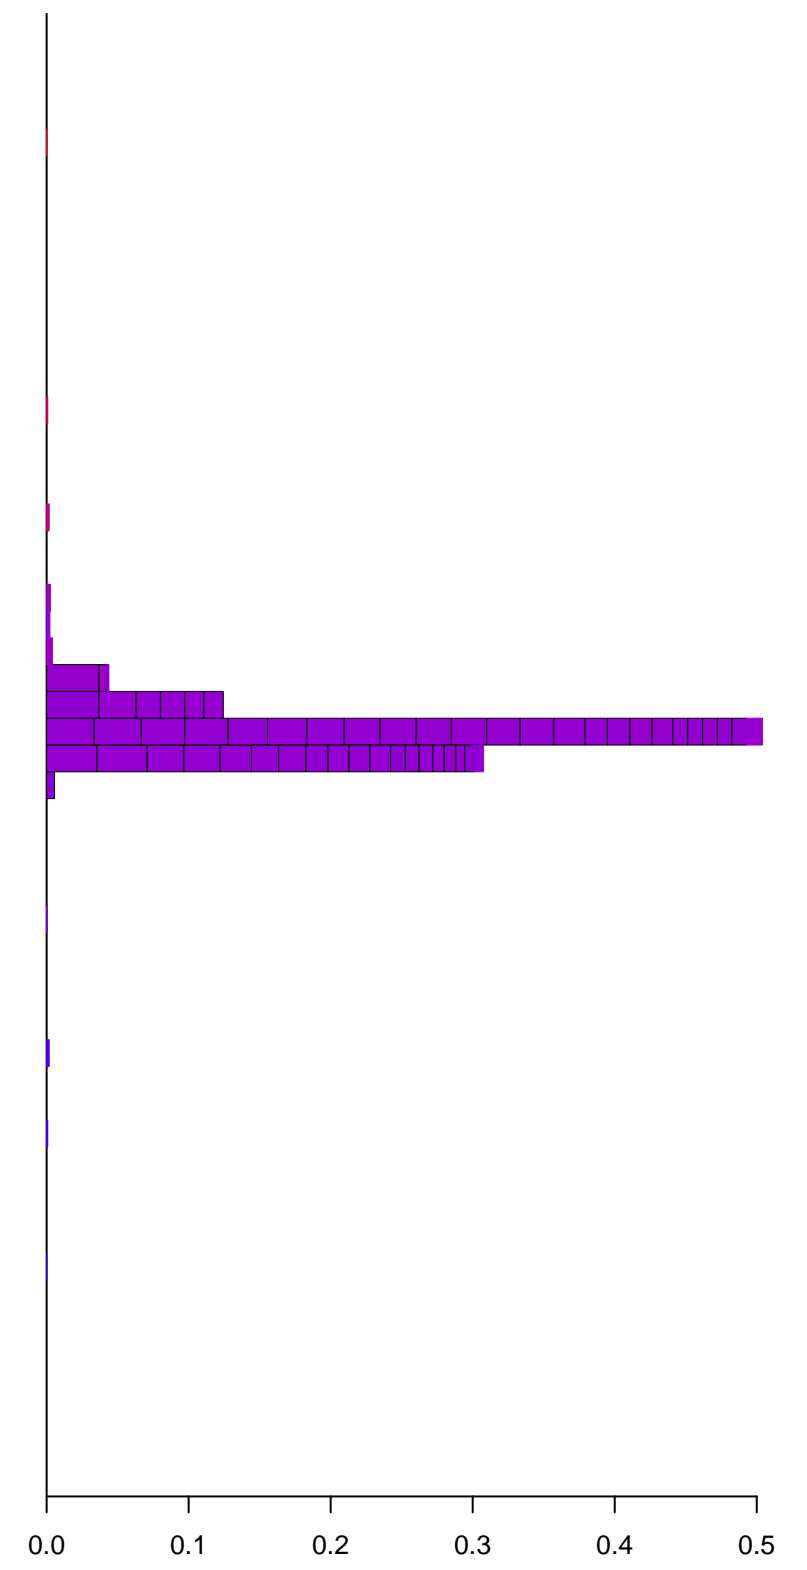

$\hat{p}_x = 0.43$ , ploidy:  $\hat{t} = 2.03$ ,  $\hat{t}_g = 2$   
 $\theta_z = 0$ ,  $\theta_0 = 1.263$ , WGD=0  
 SCNA LL = -207.77, SSNV LL = -4510.55, SCNA Ev = -30.78027

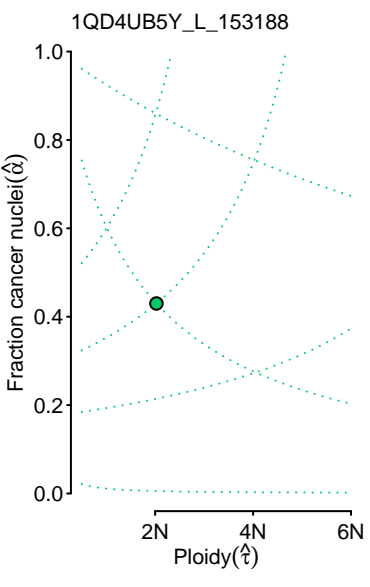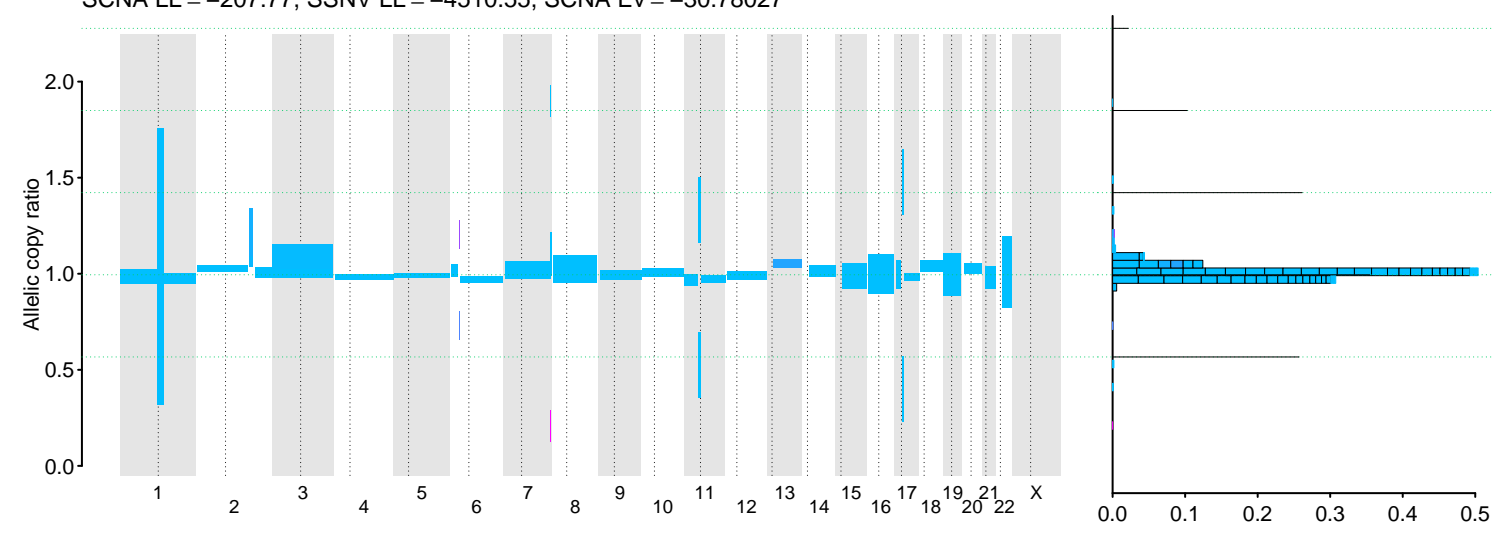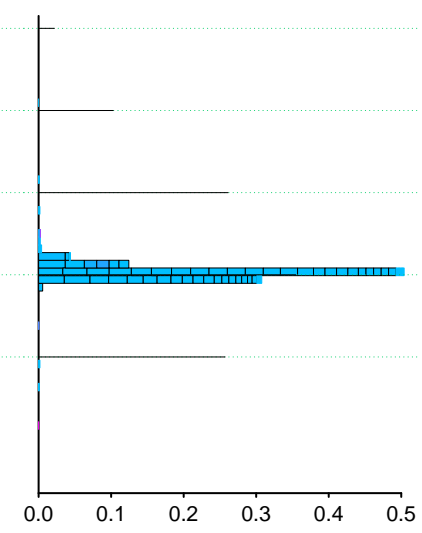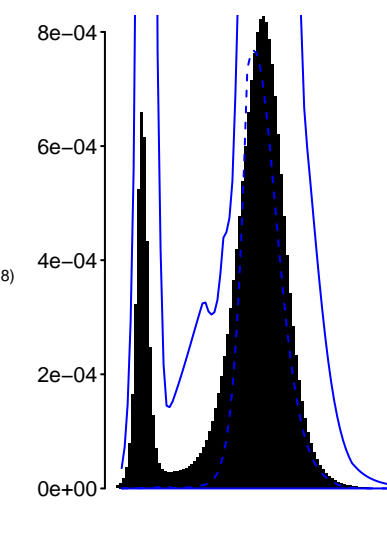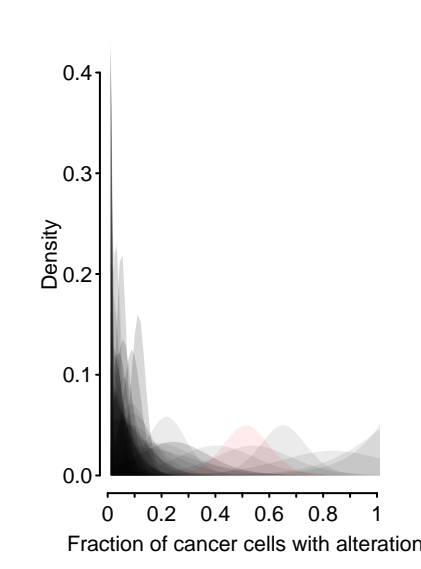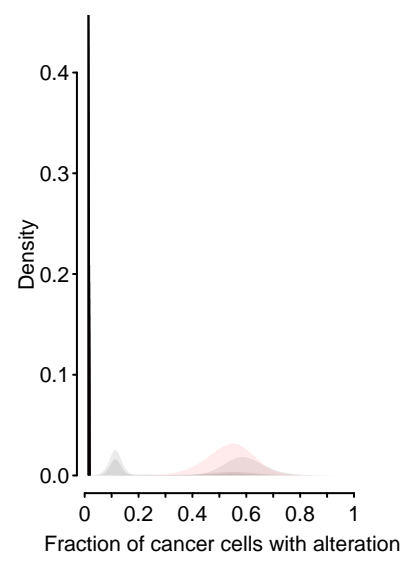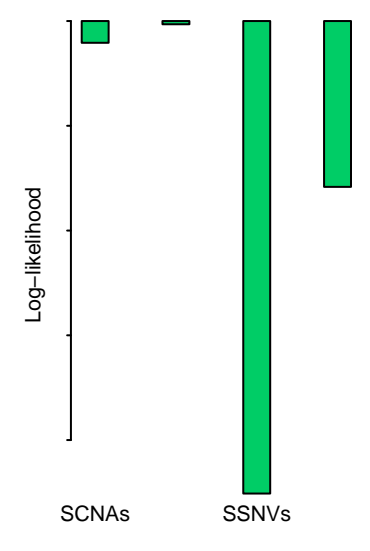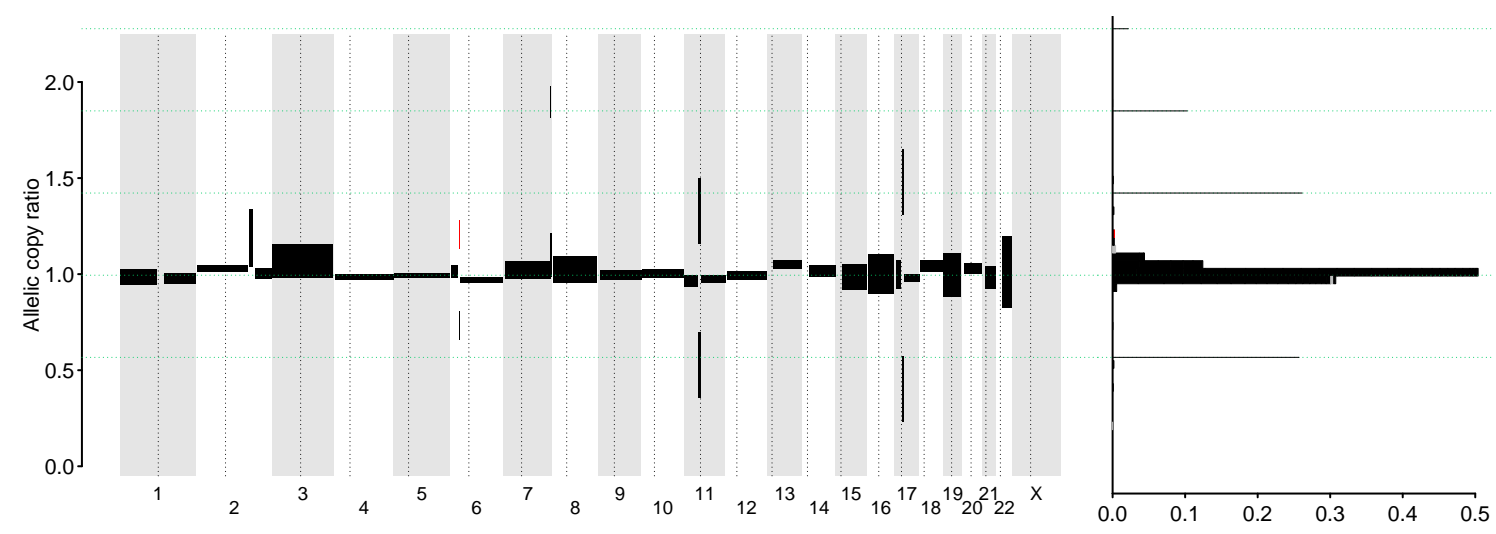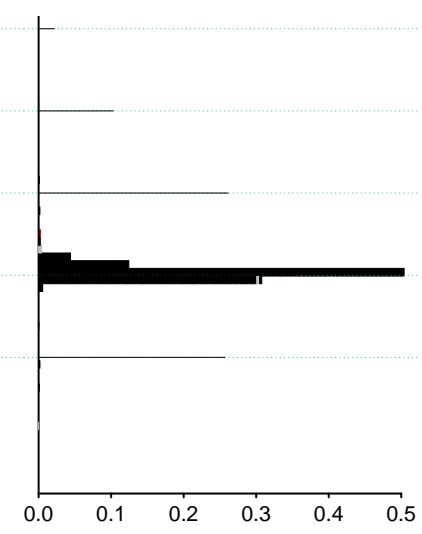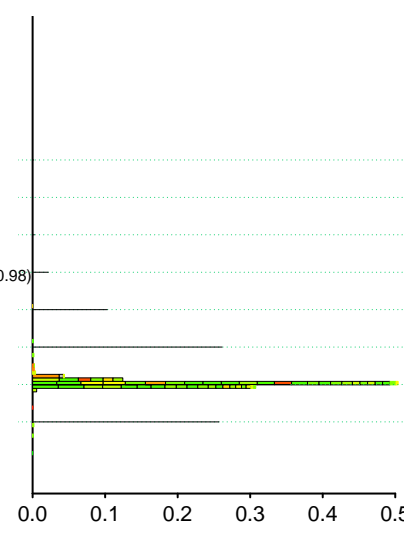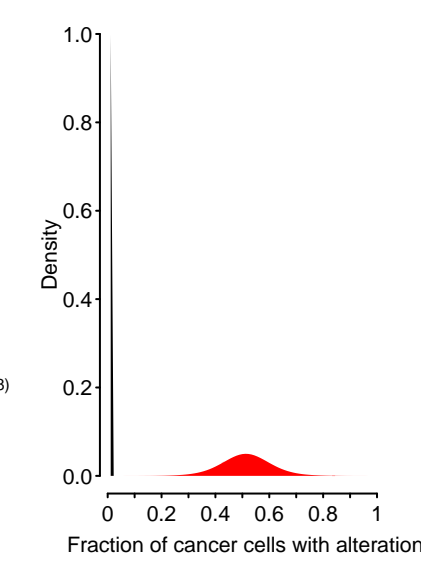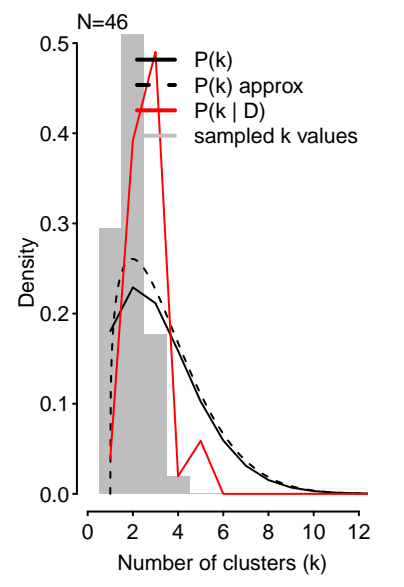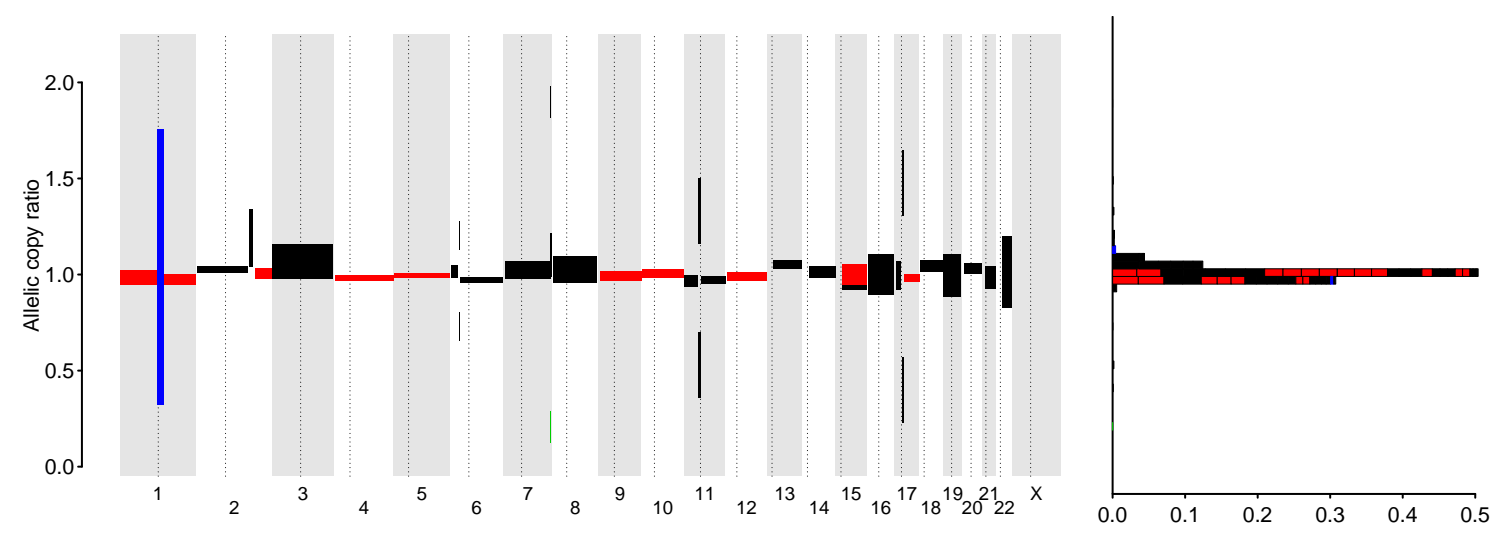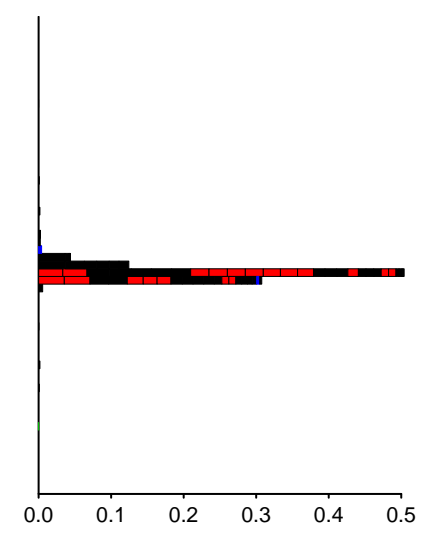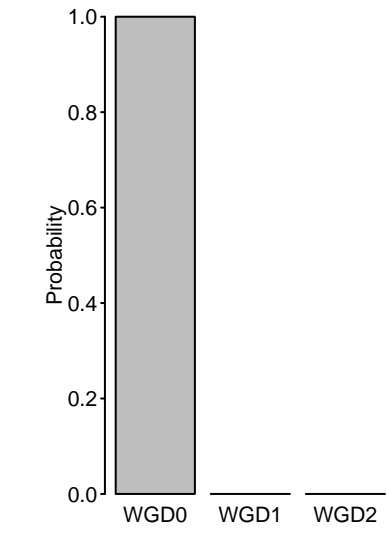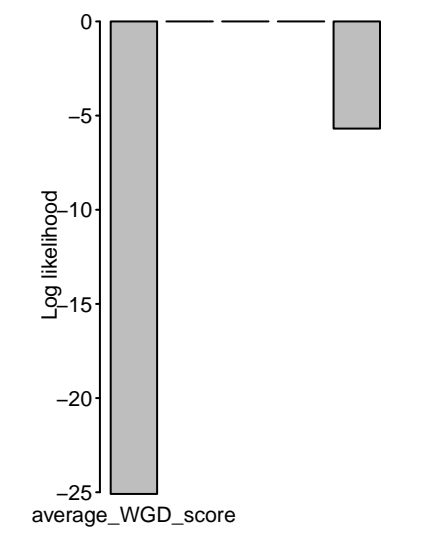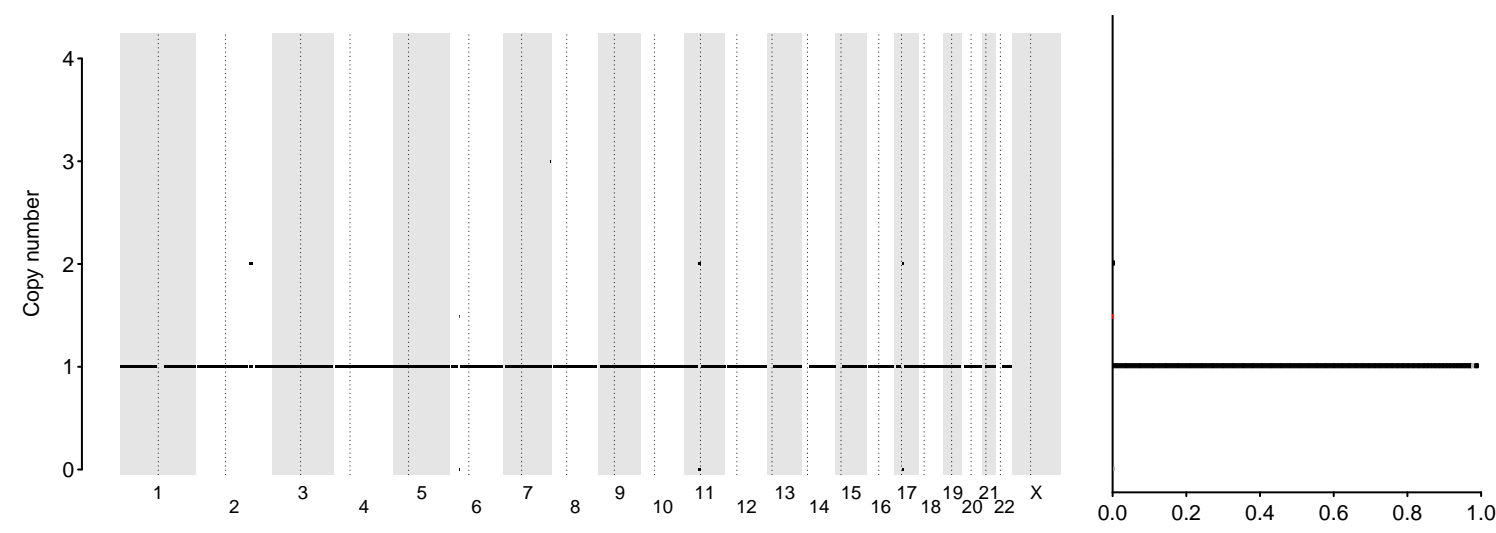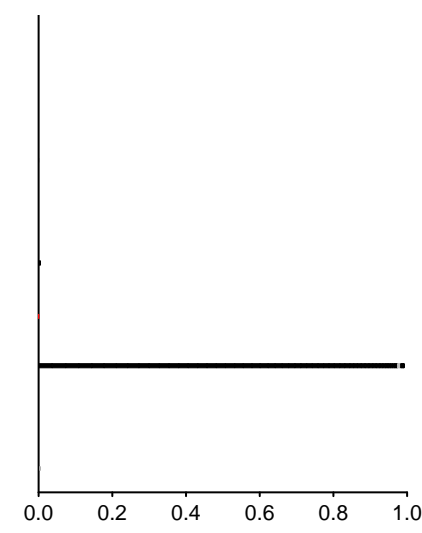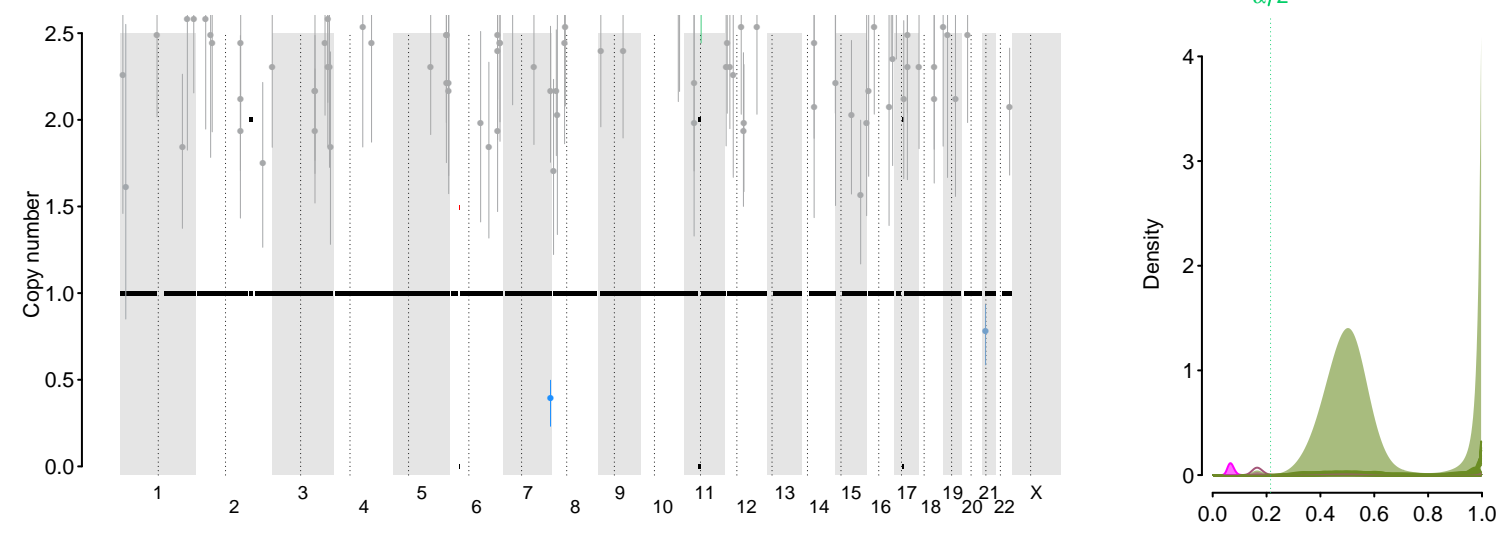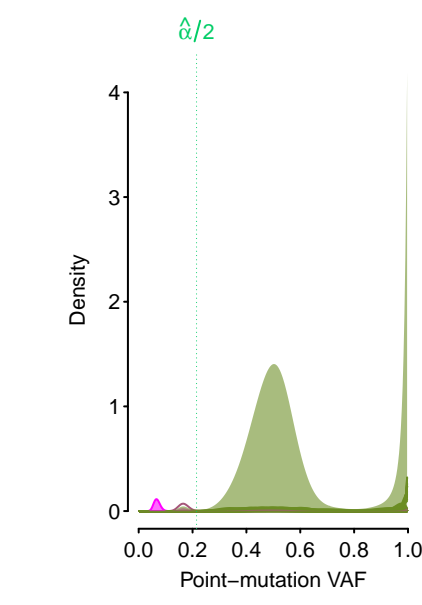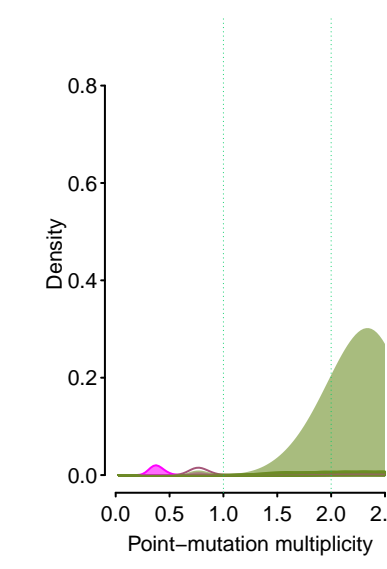

Sample 34

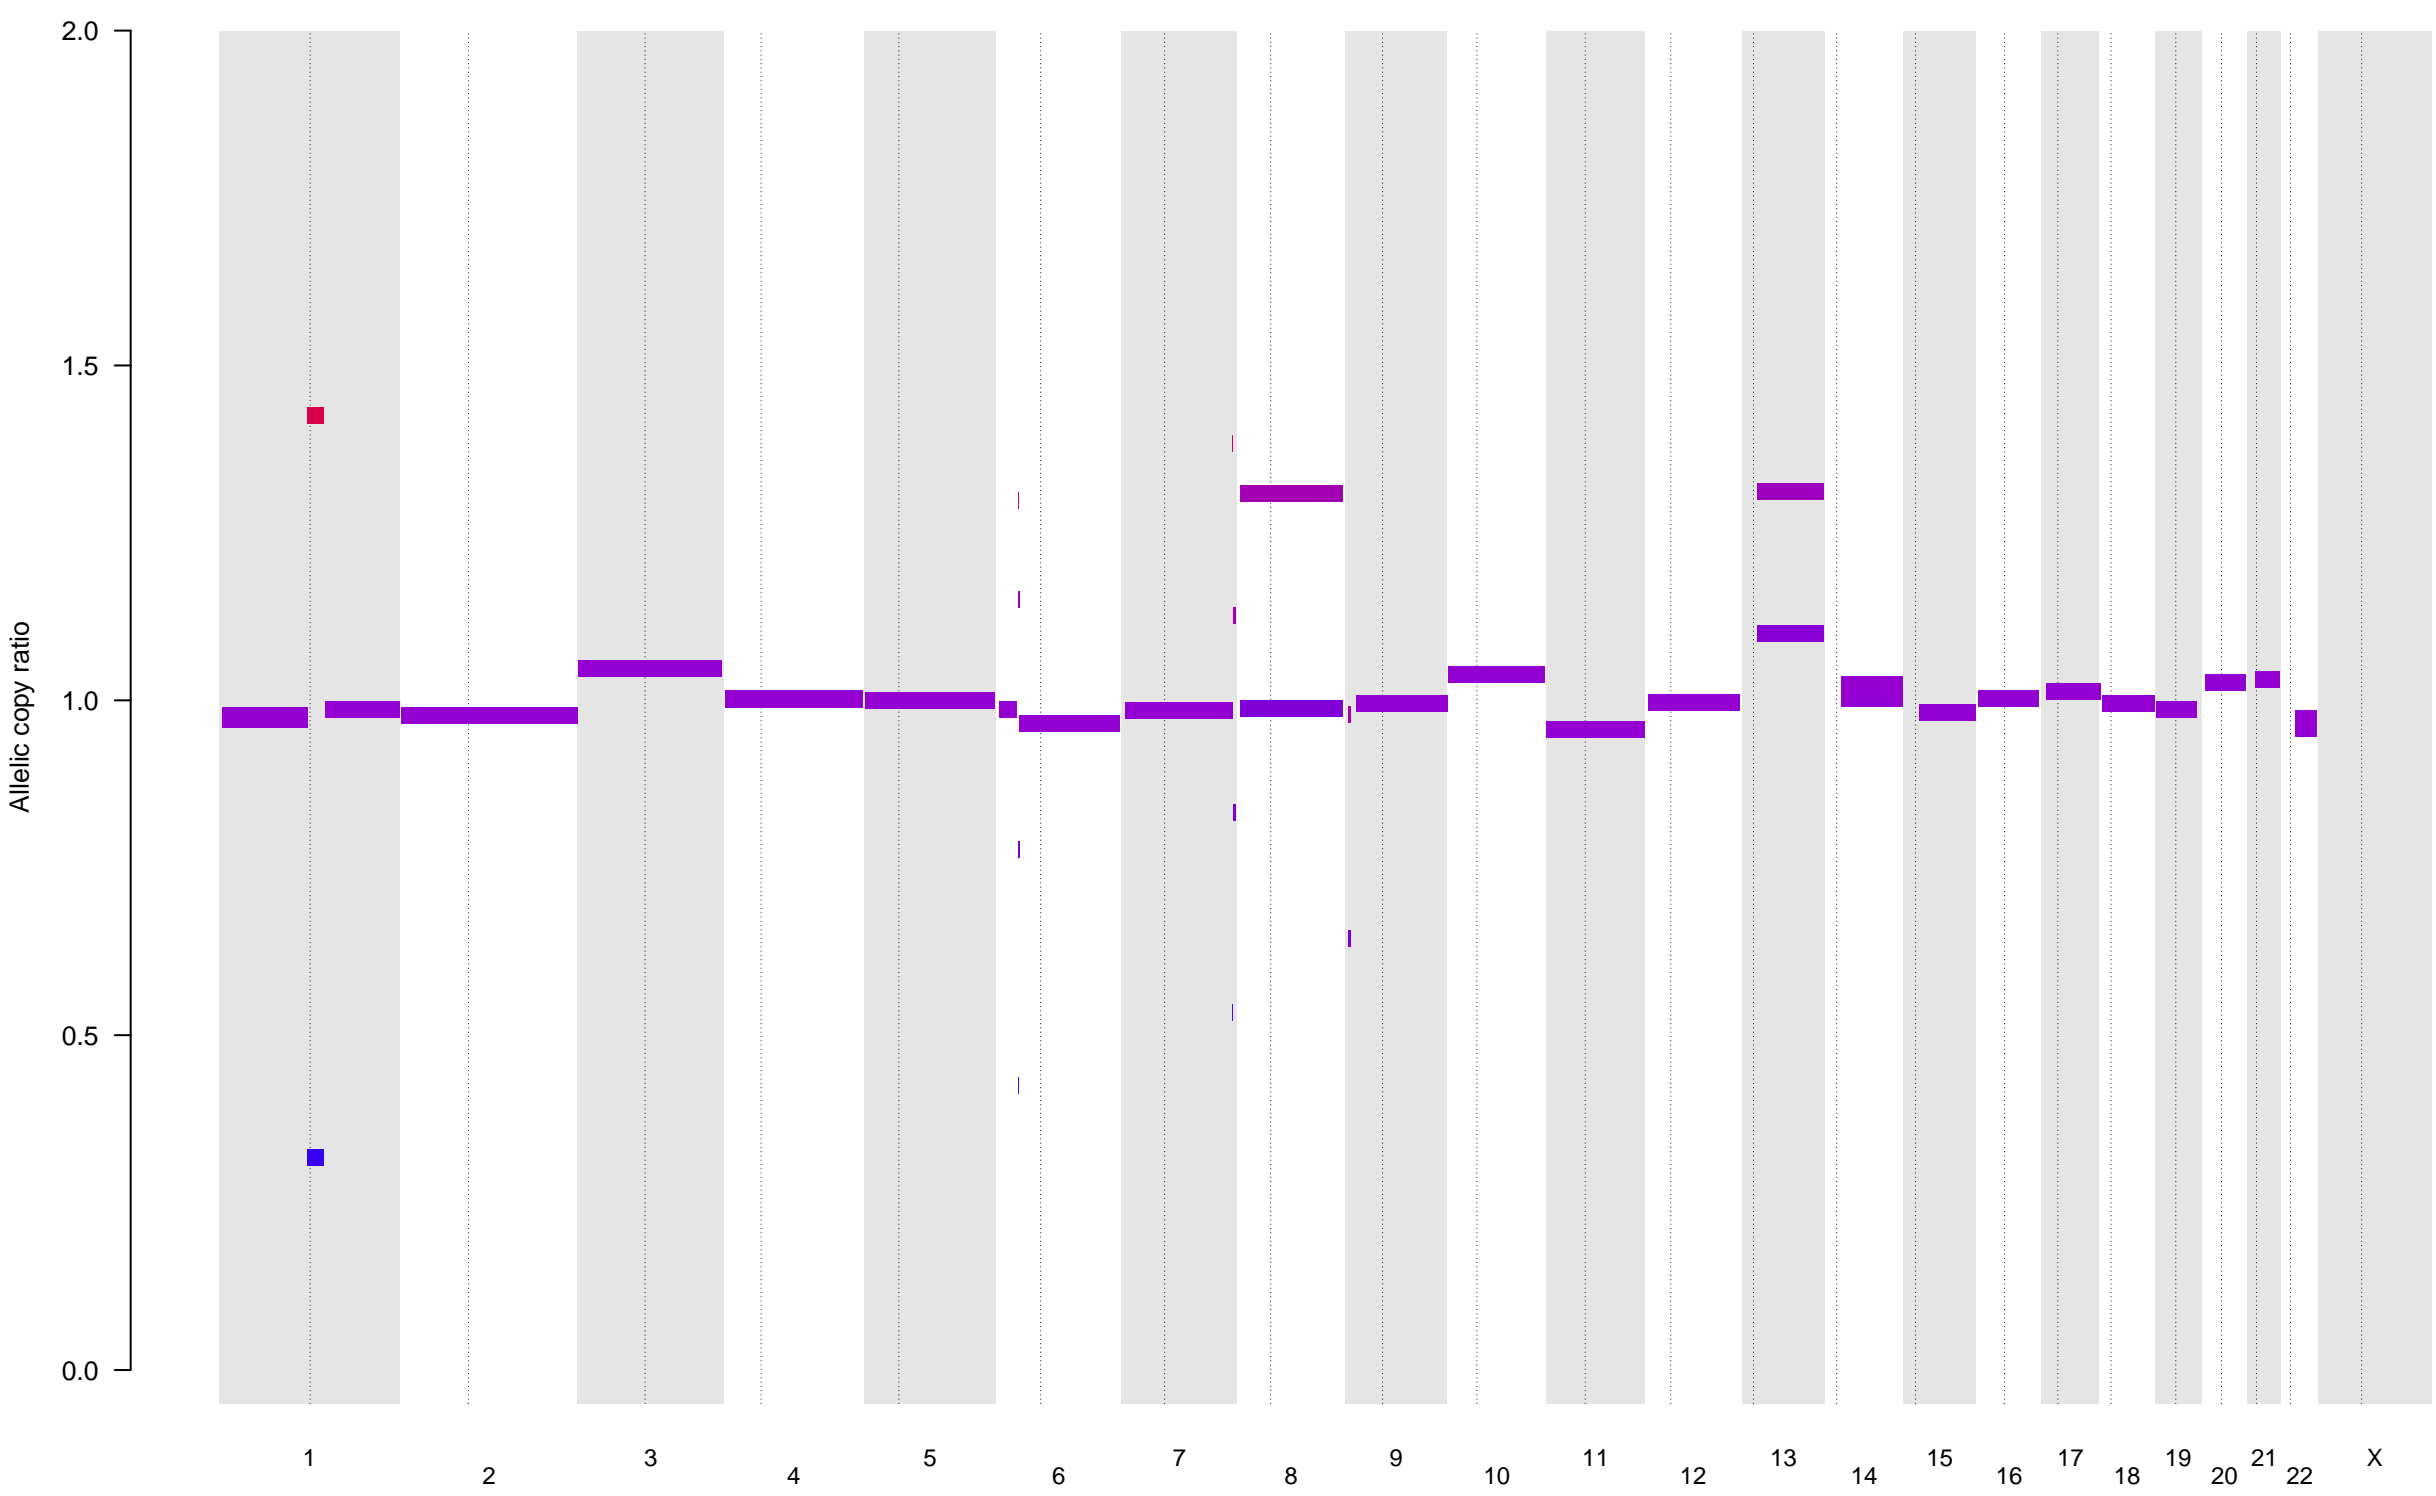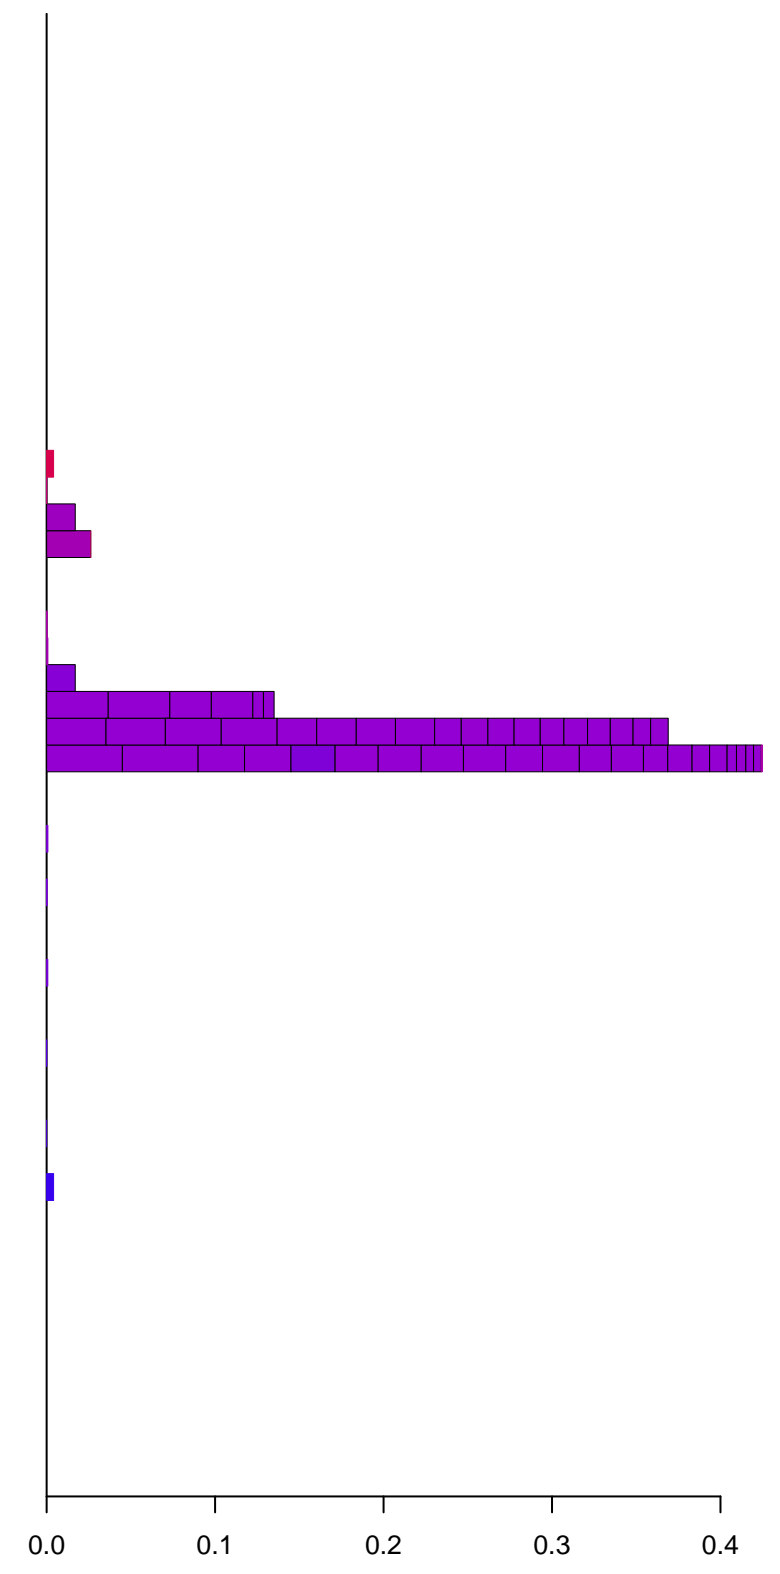

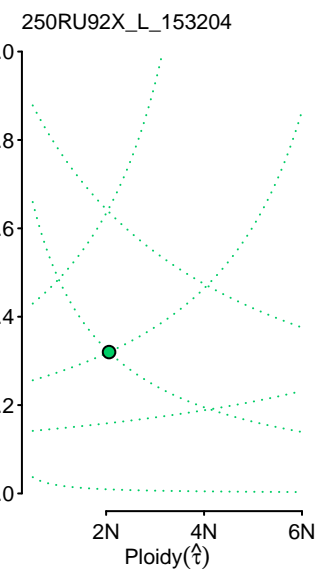

purity( $\hat{\lambda}$ ) = 0.32, ploidy:  $\hat{h} = 2.06$ ,  $\hat{h}_g = 2.09$   
 $\theta_z = 0.09$ ,  $\theta_Q = 1.284$ , WGD=0  
 SCNA LL = -182.54, SSNV LL = -4542.89, SCNA Ev = -54.17516

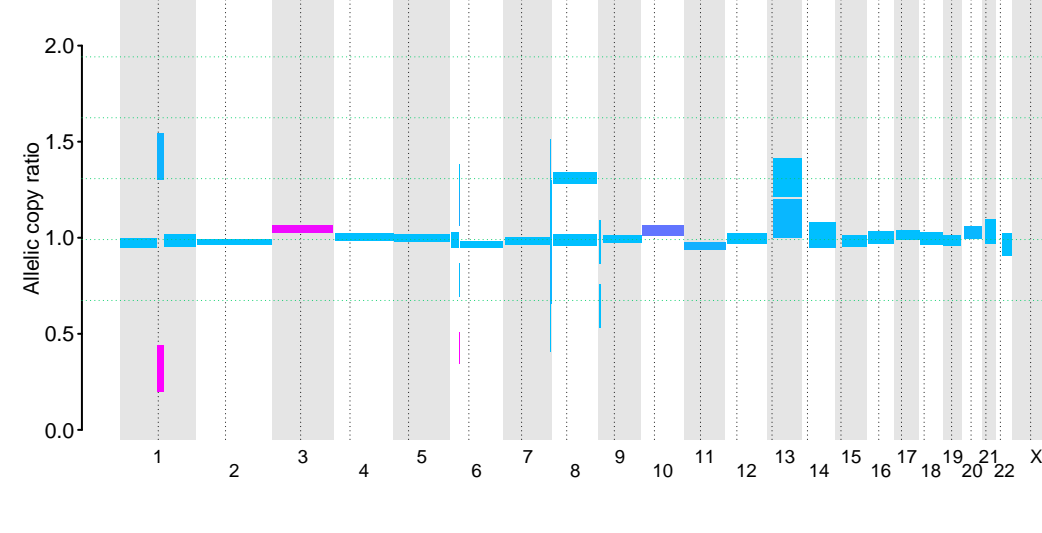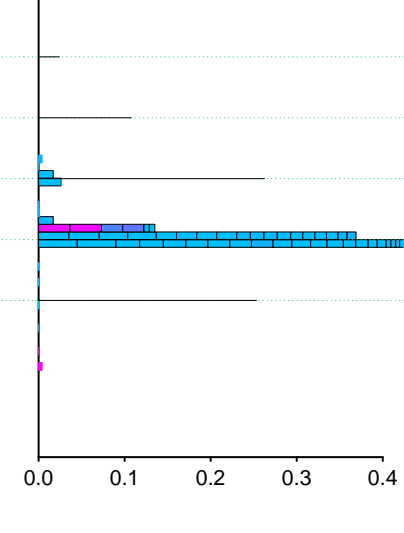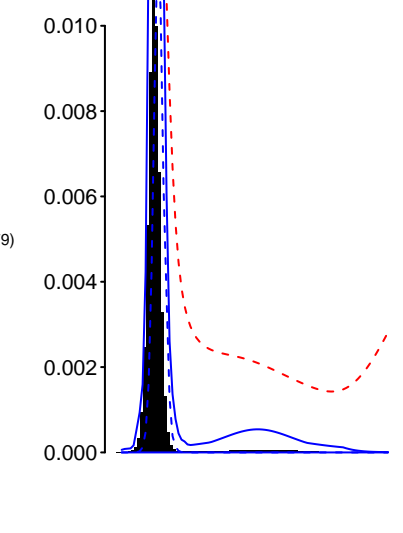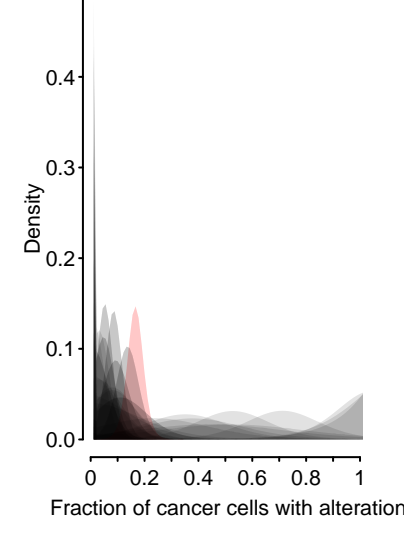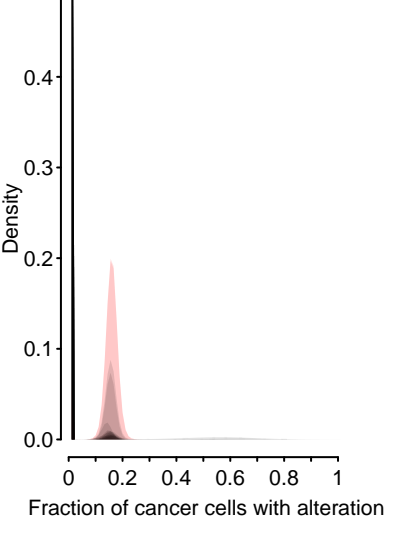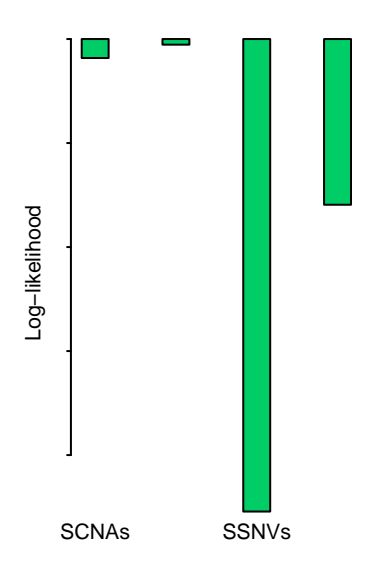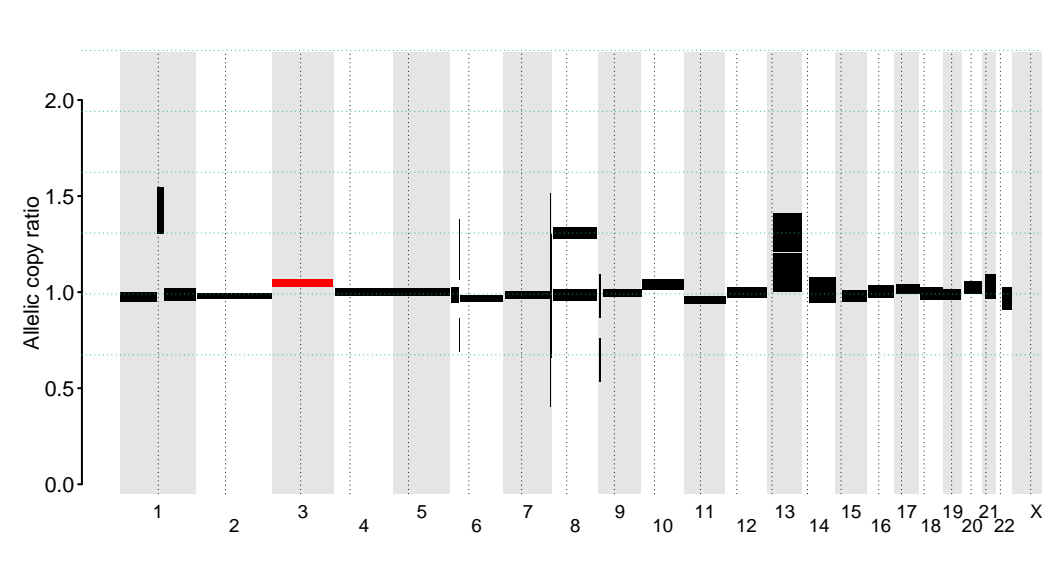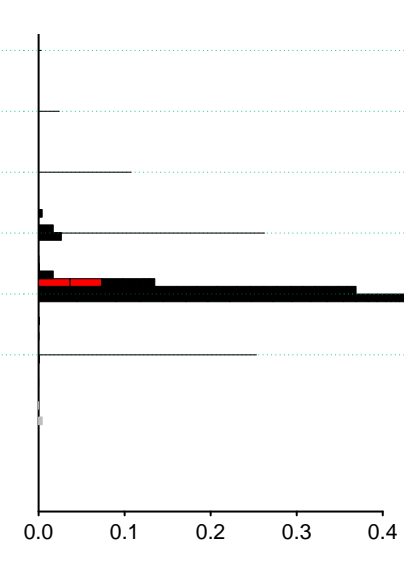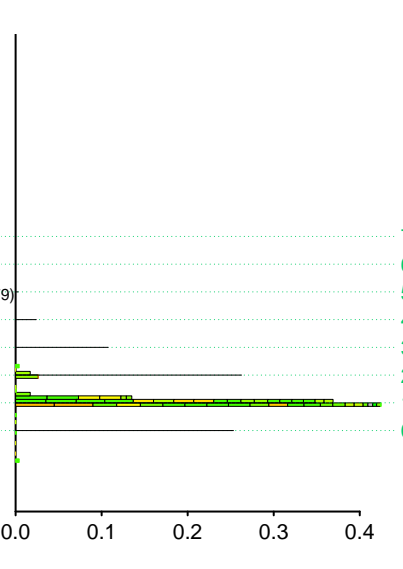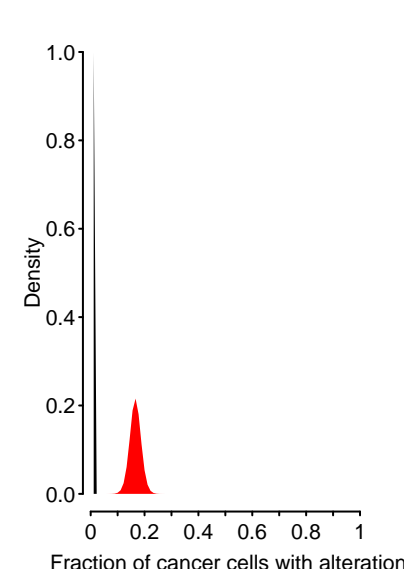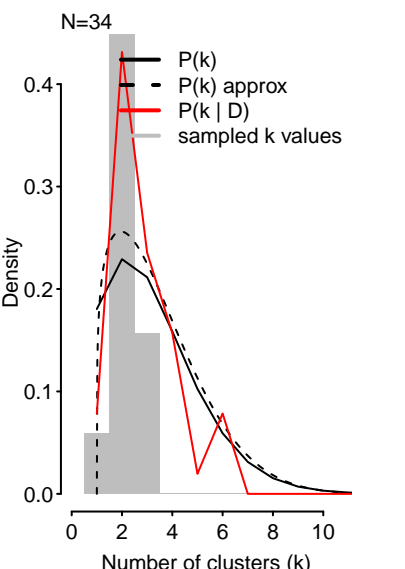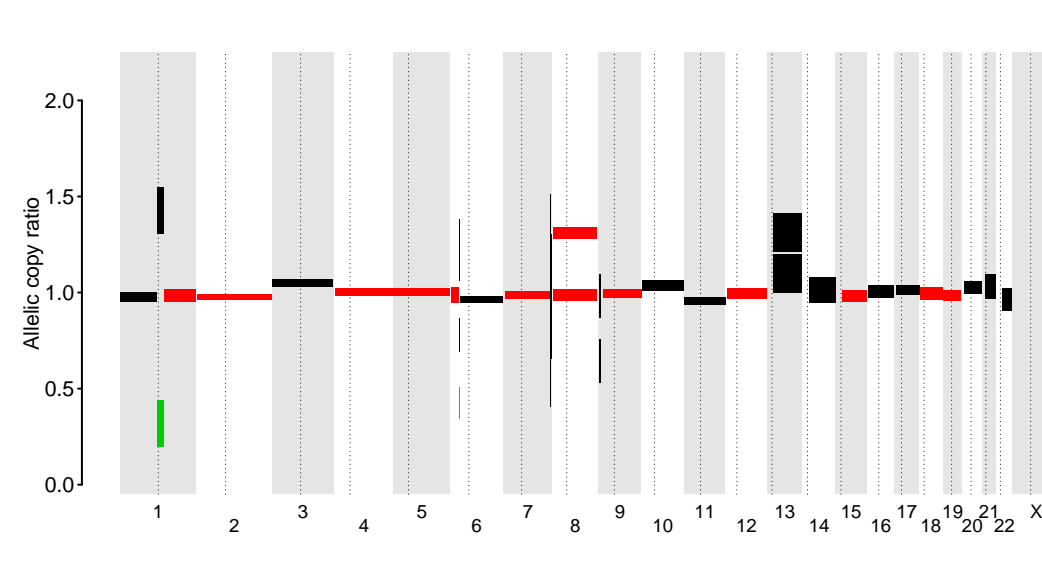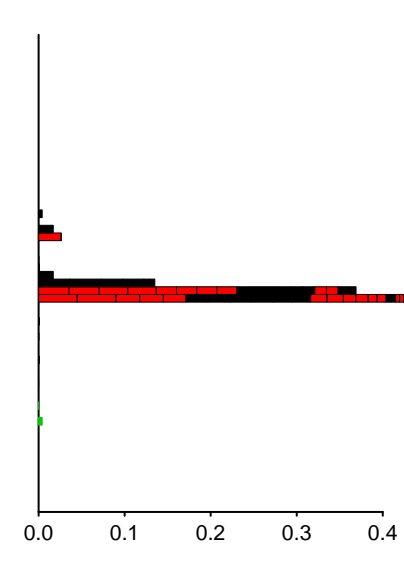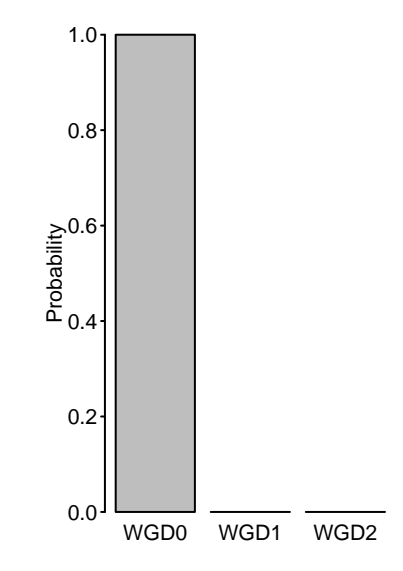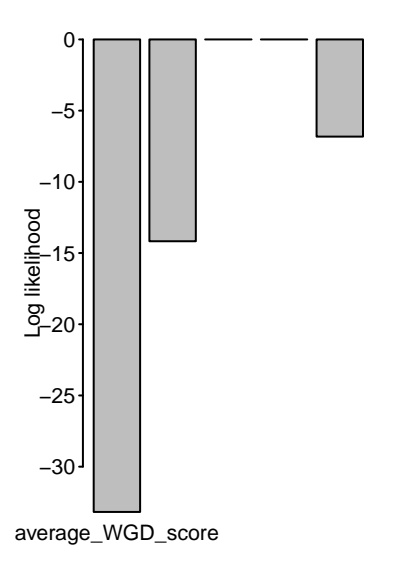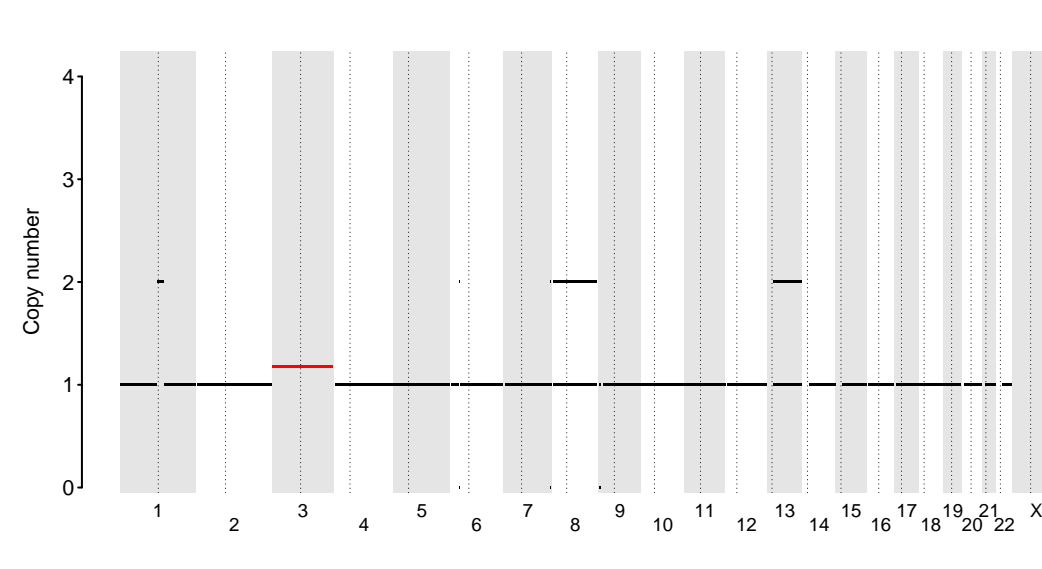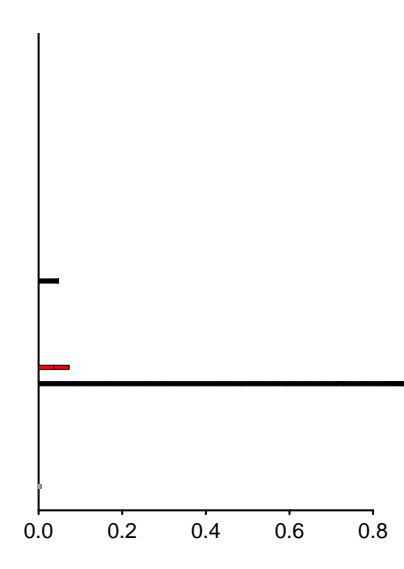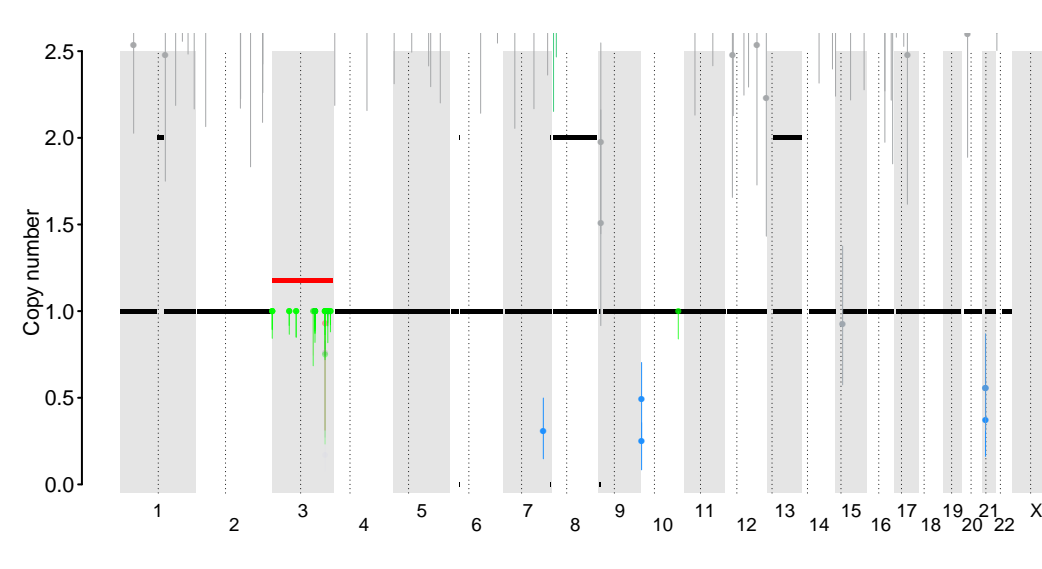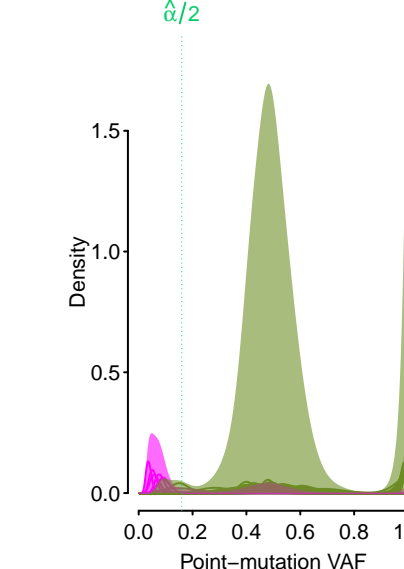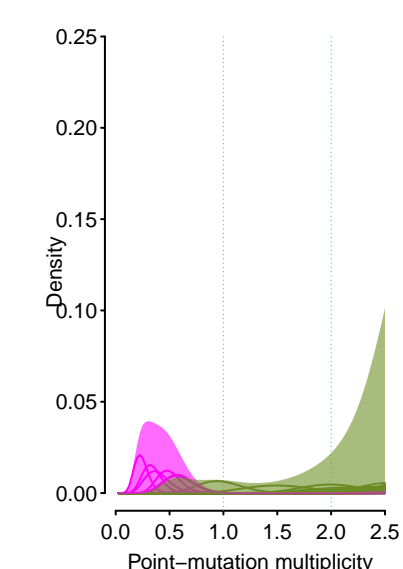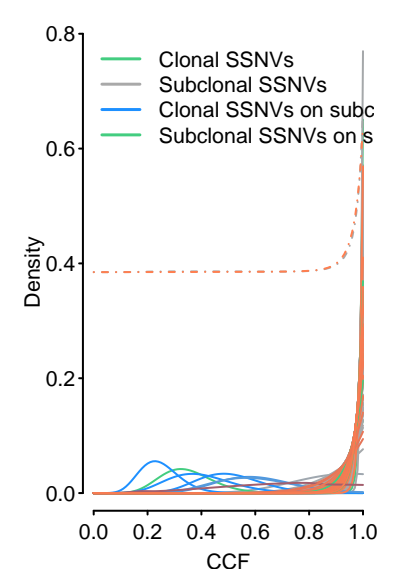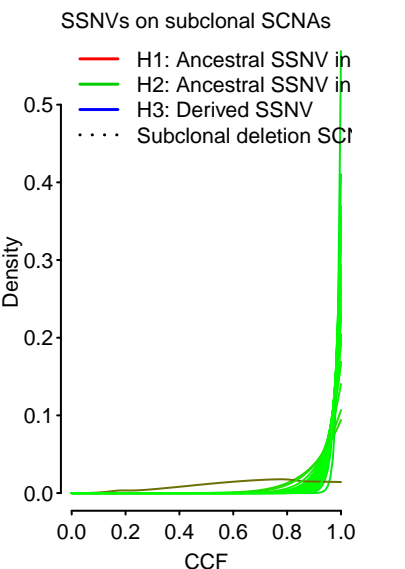



Sample 35

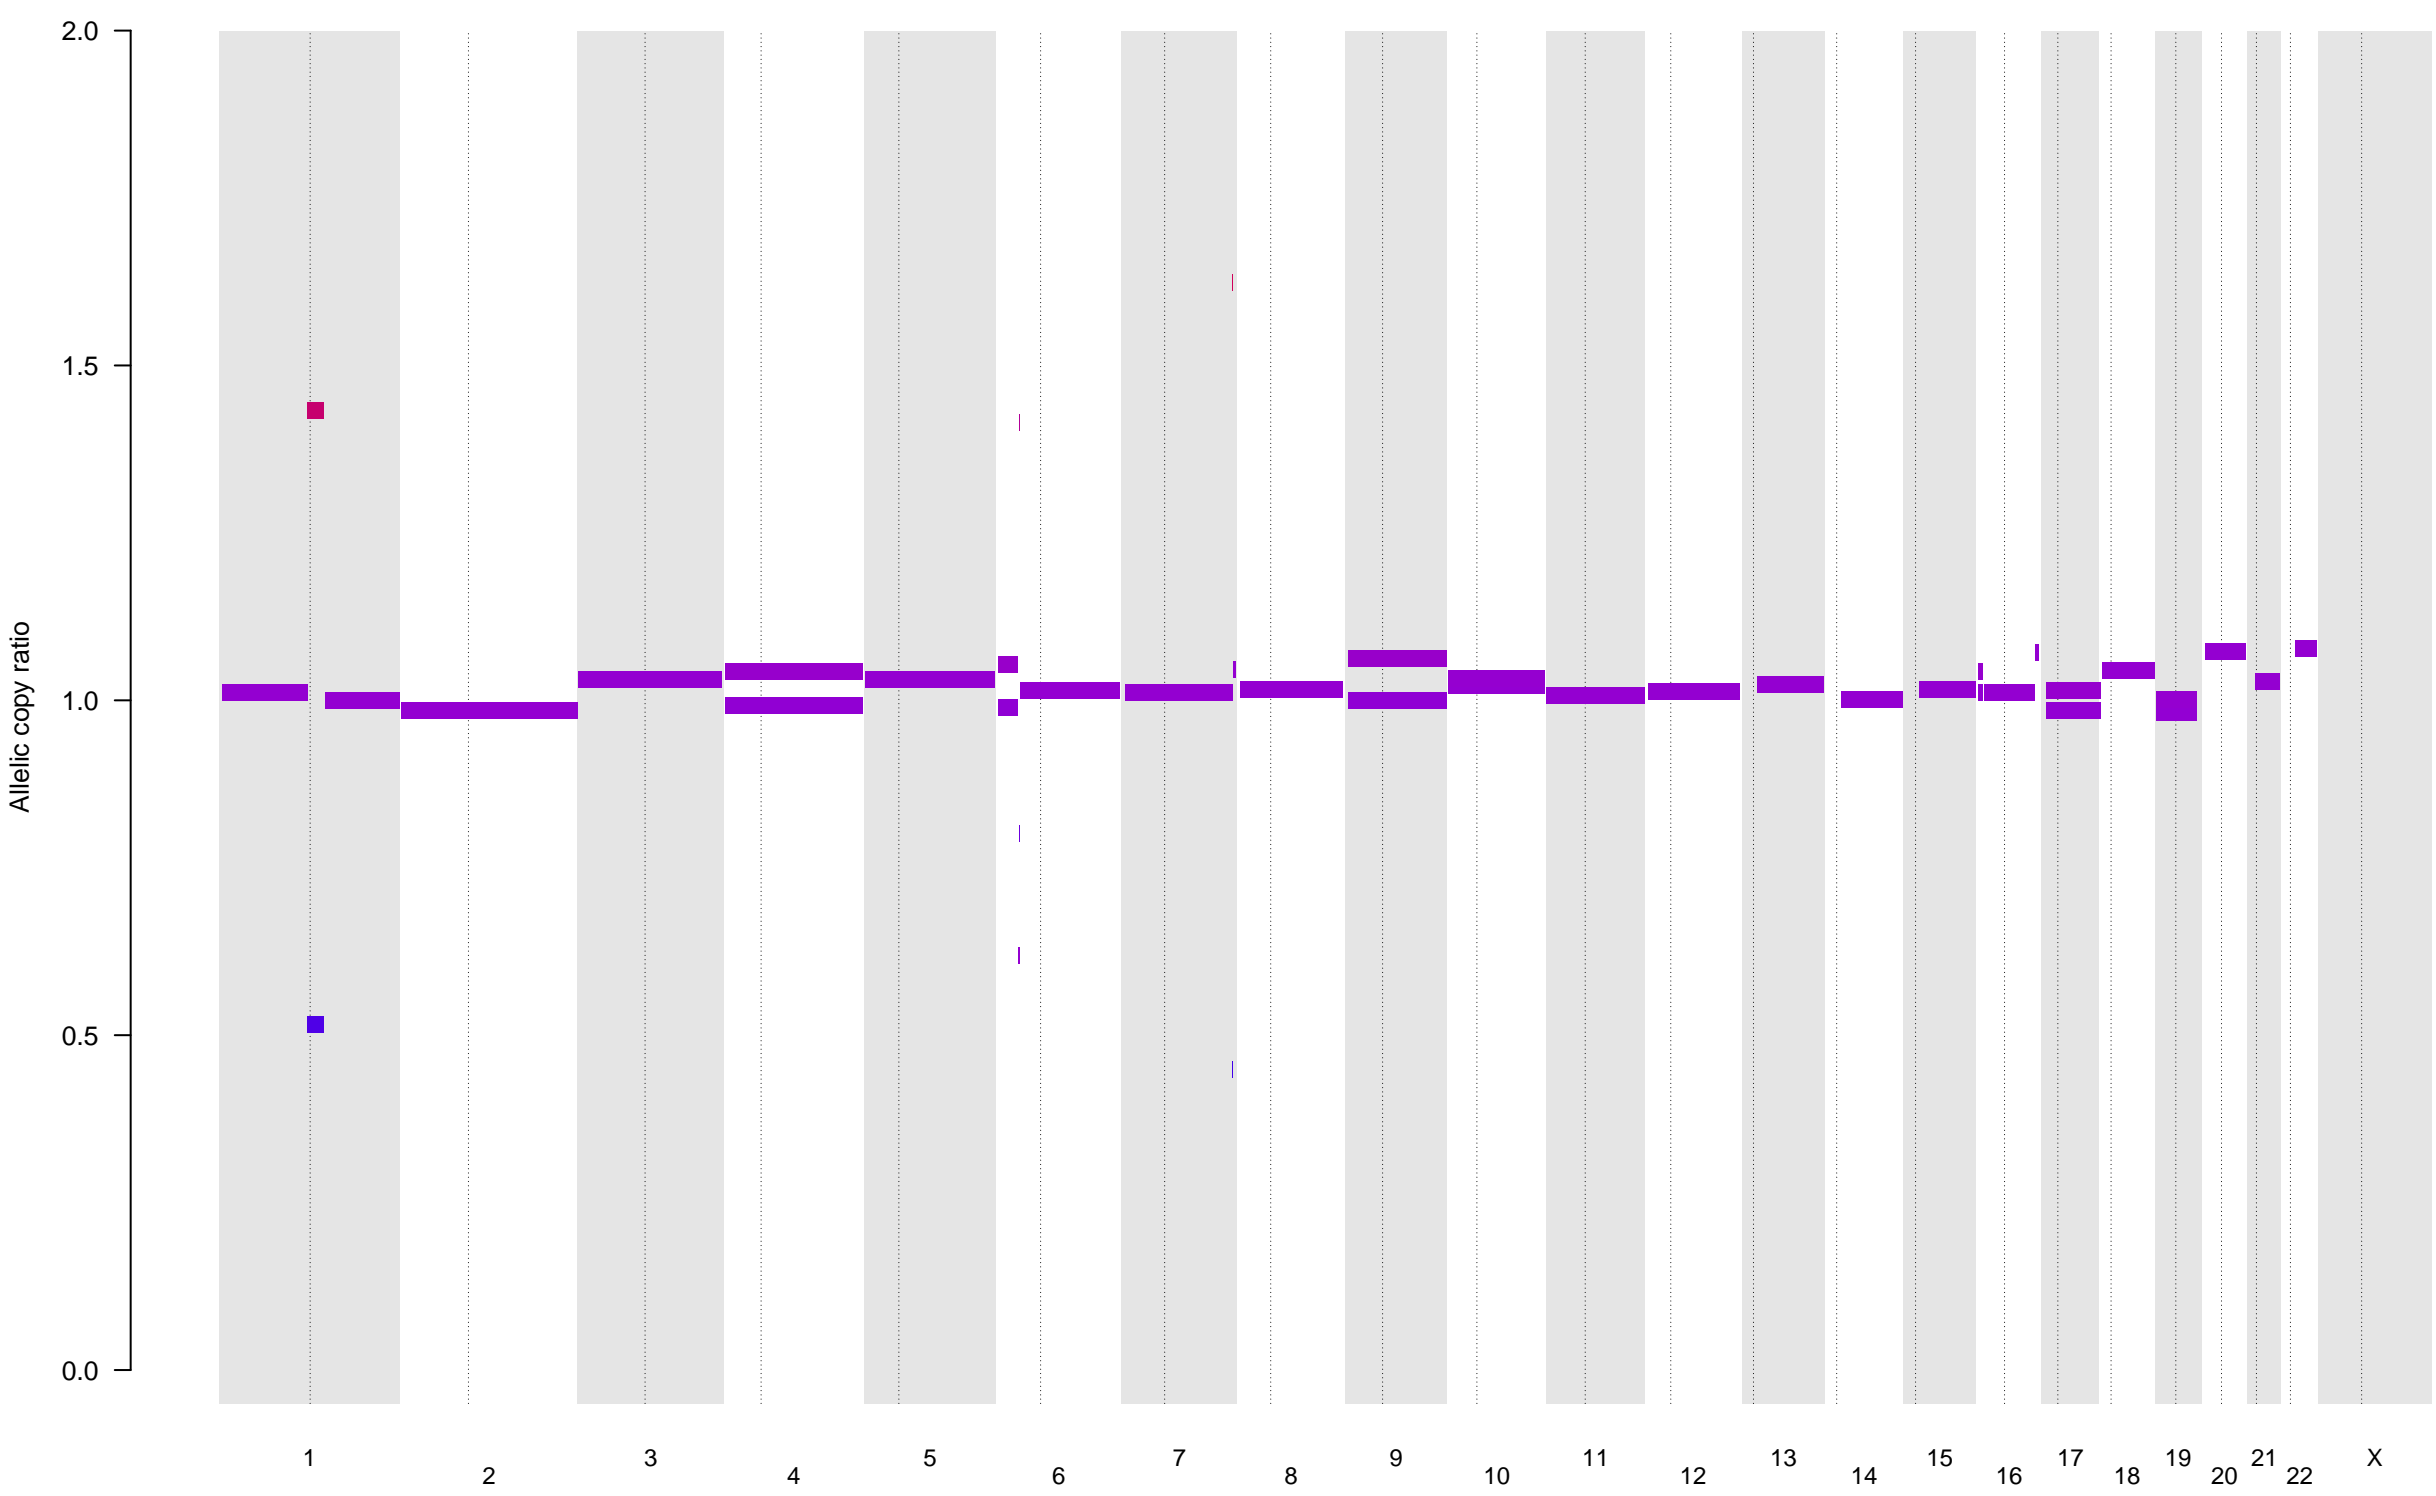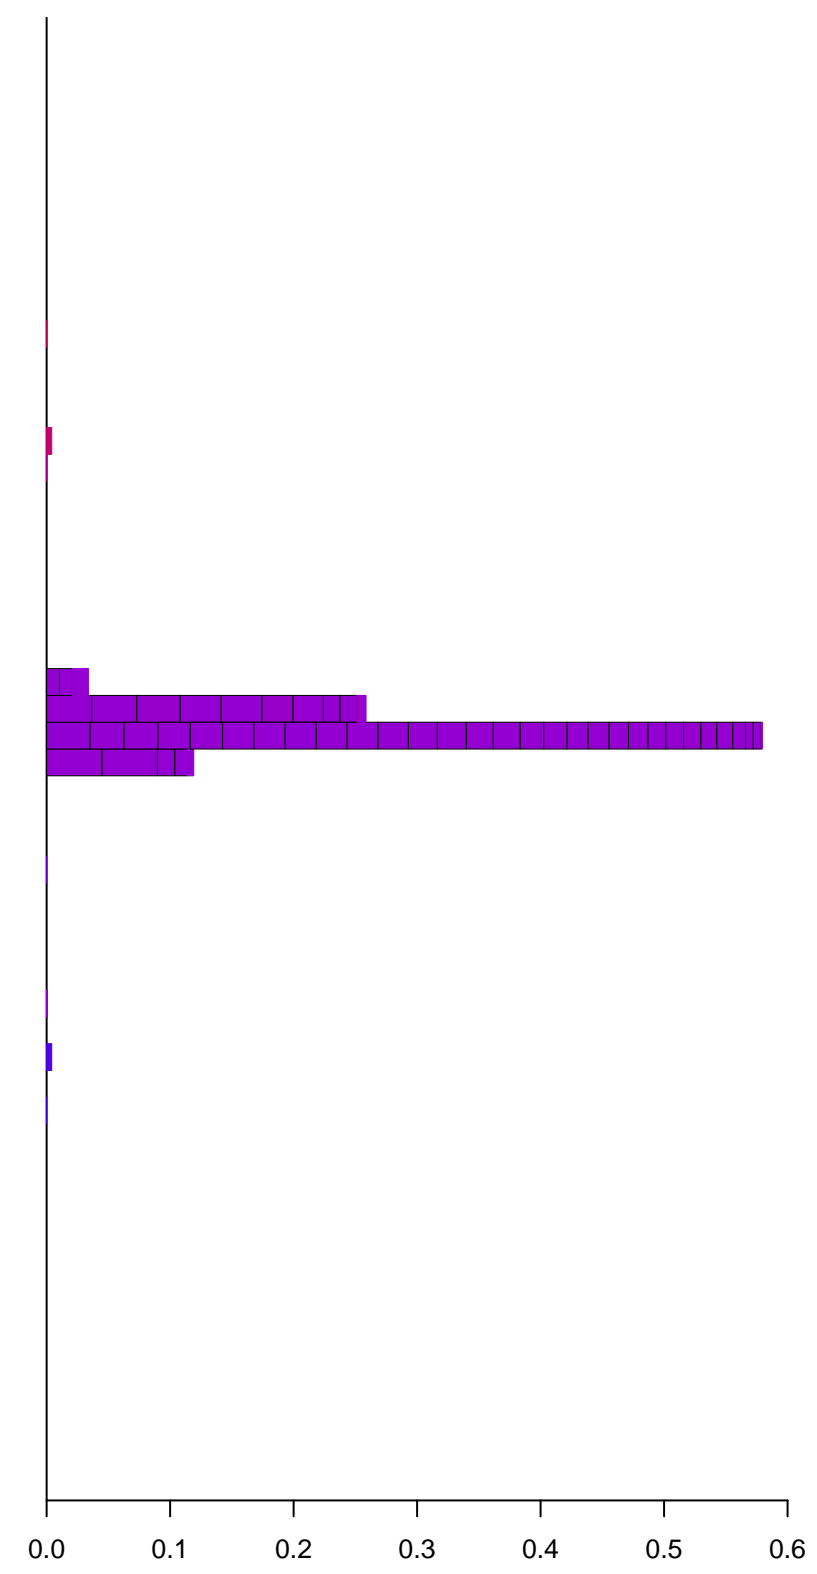

purity( $\hat{\alpha}$ ) = 0.16, ploidy:  $\hat{t} = 1.93$ ,  $\hat{t}_g = 2.02$   
 $\theta_z = 0.02$ ,  $\theta_a = 1.504$ , WGD=0  
 SCNA LL = -236.71, SSNV LL = -9953.22, SCNA Ev = -29.60161

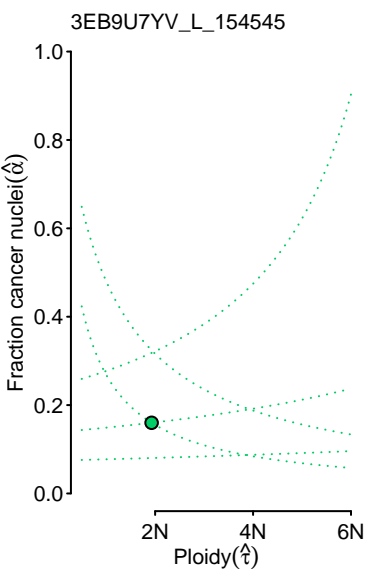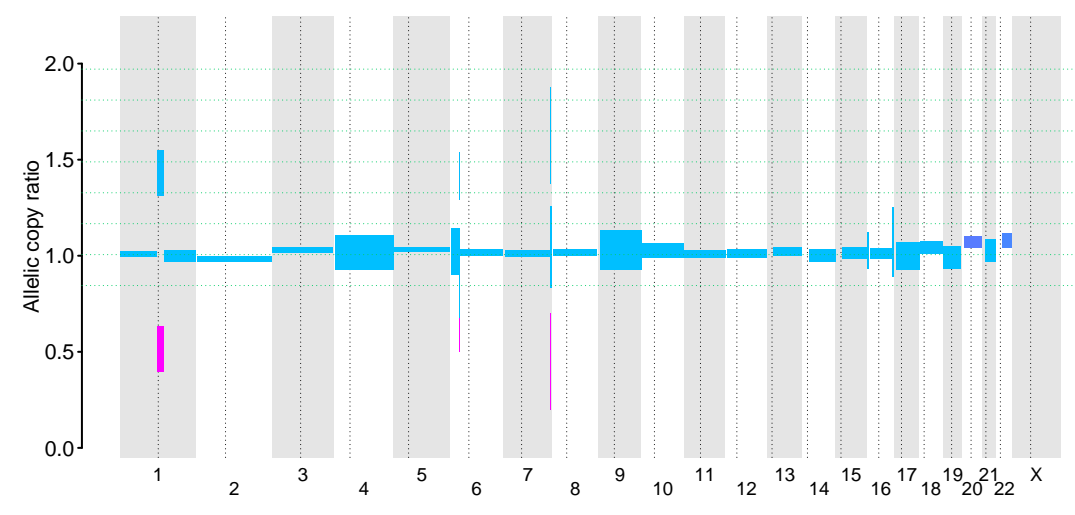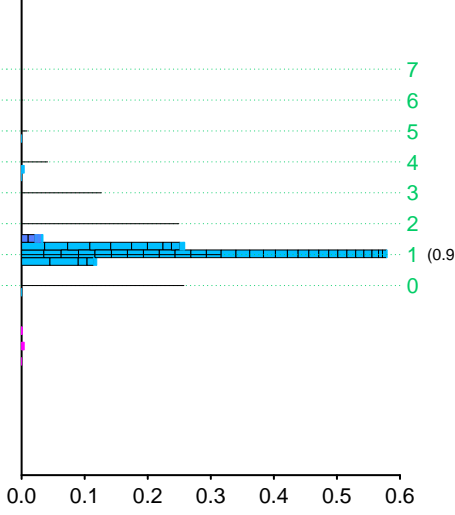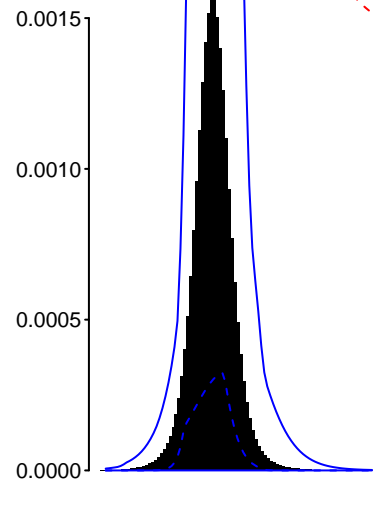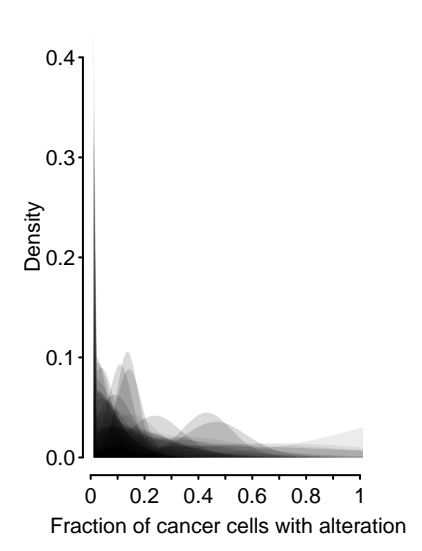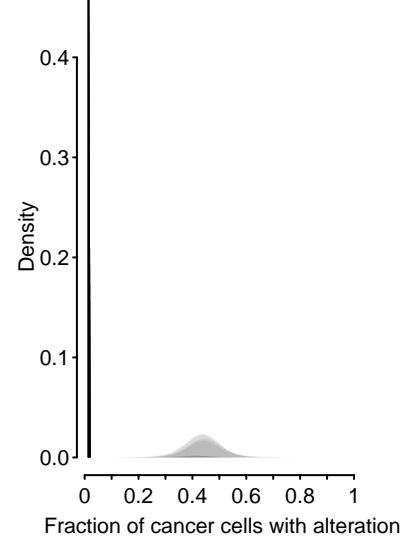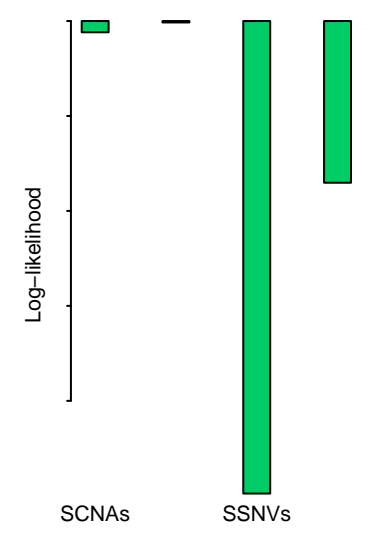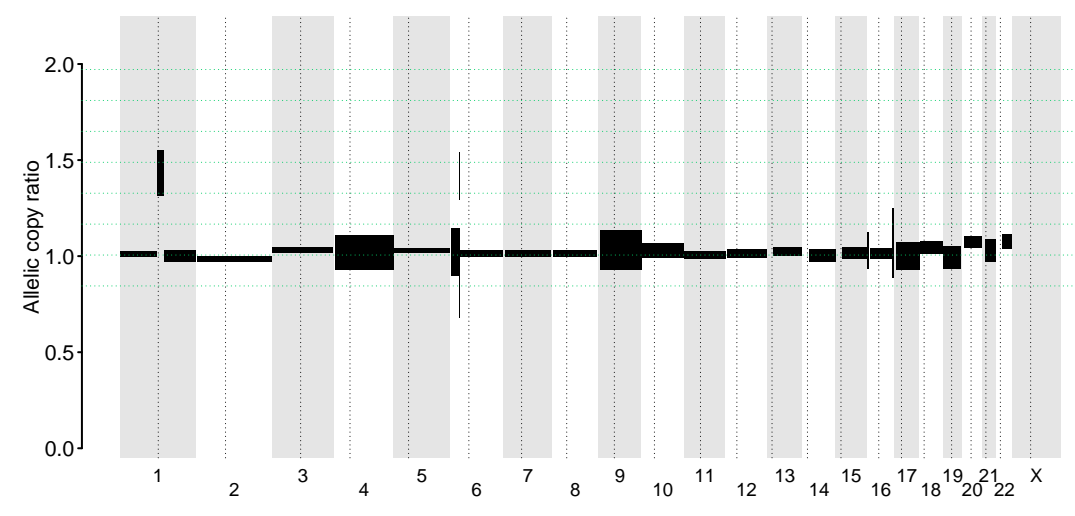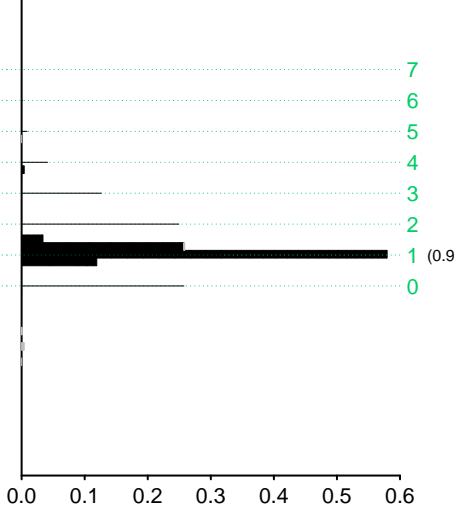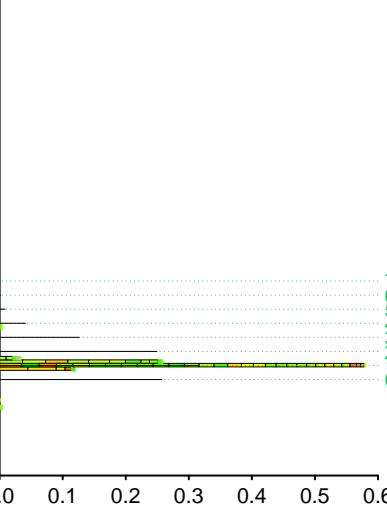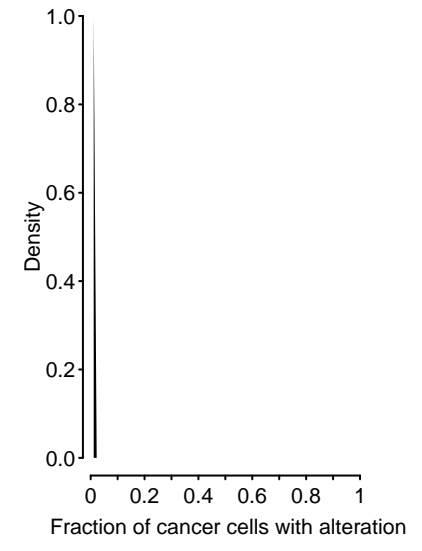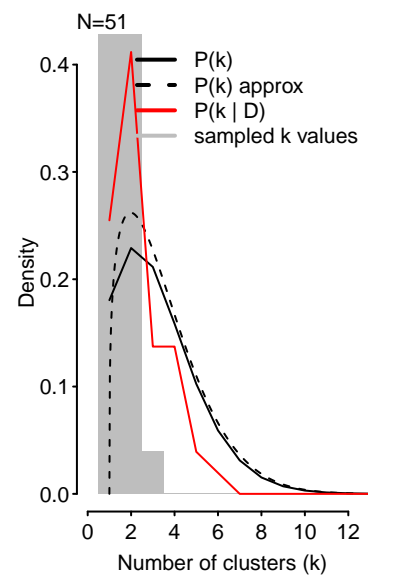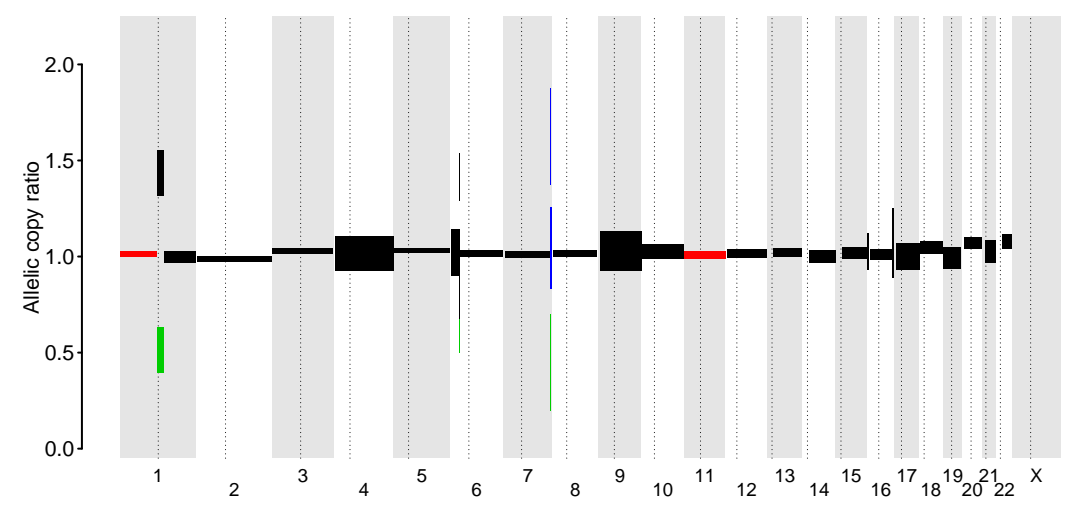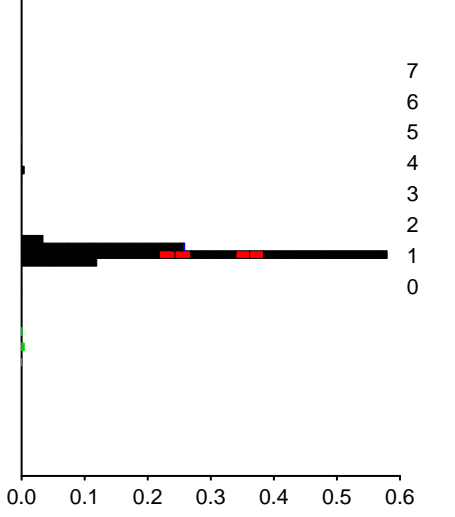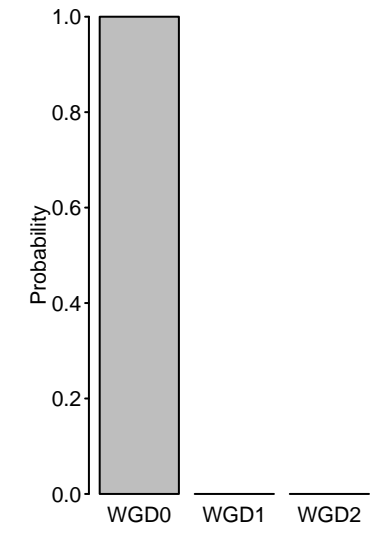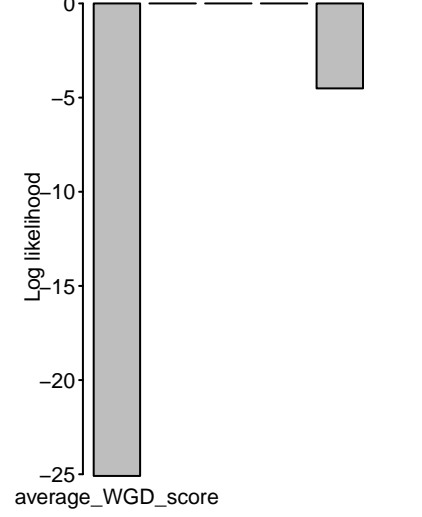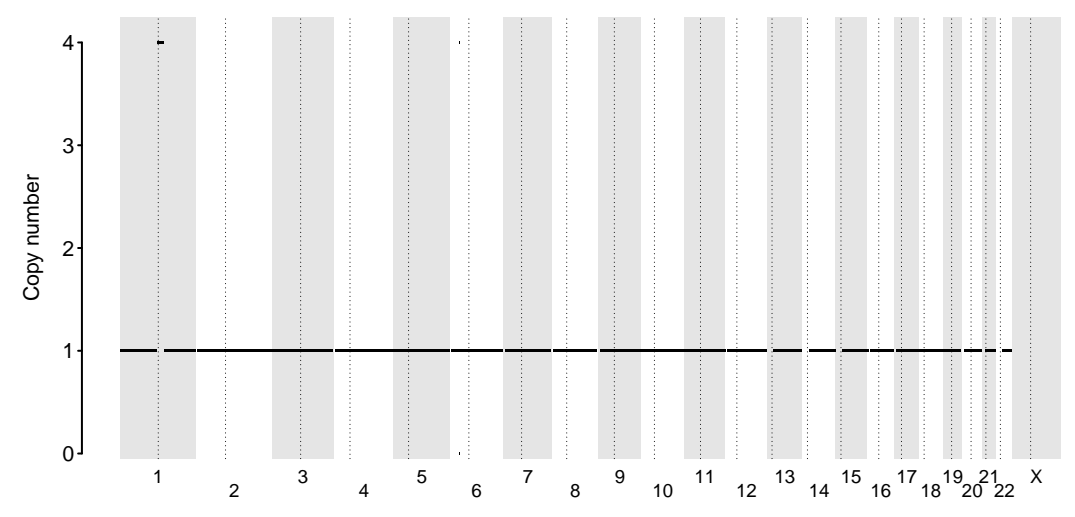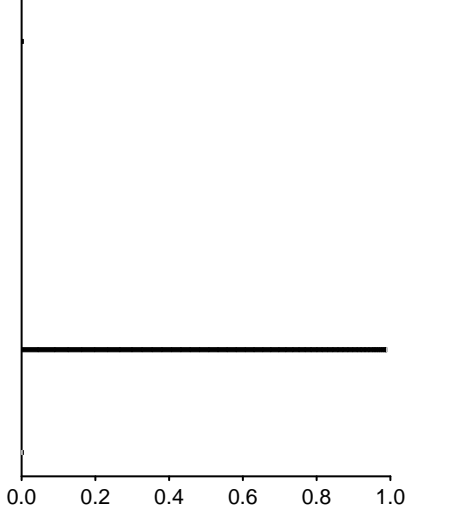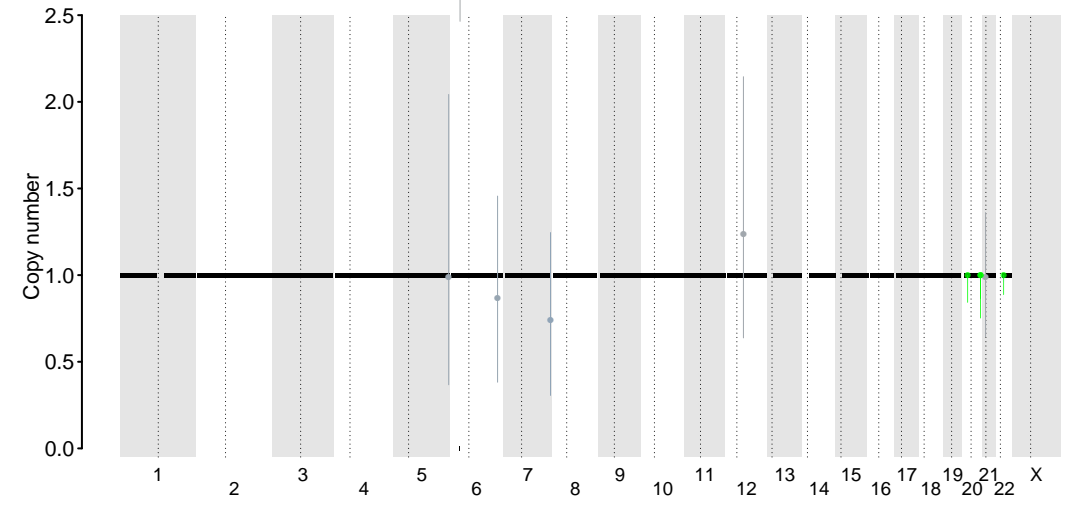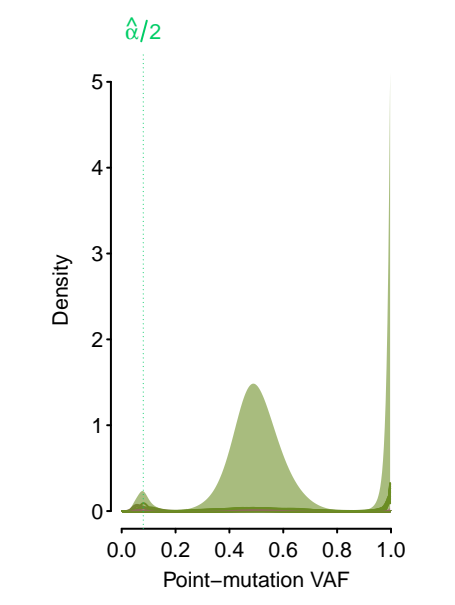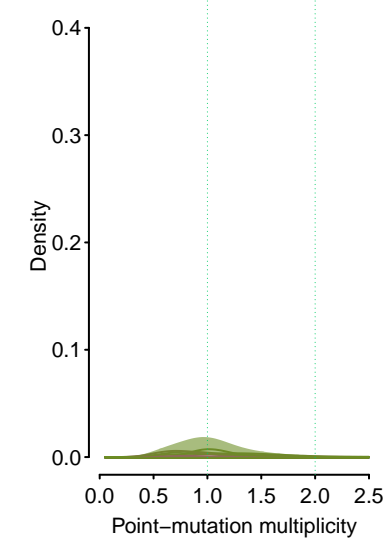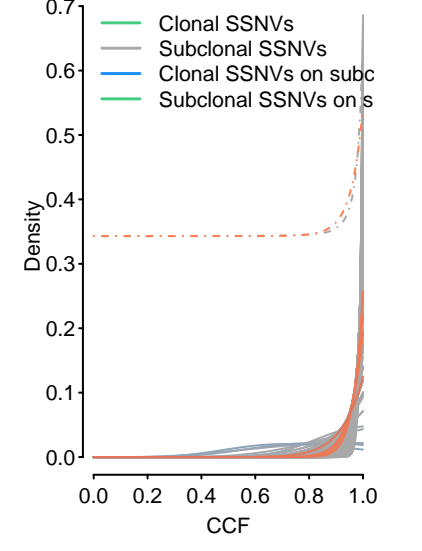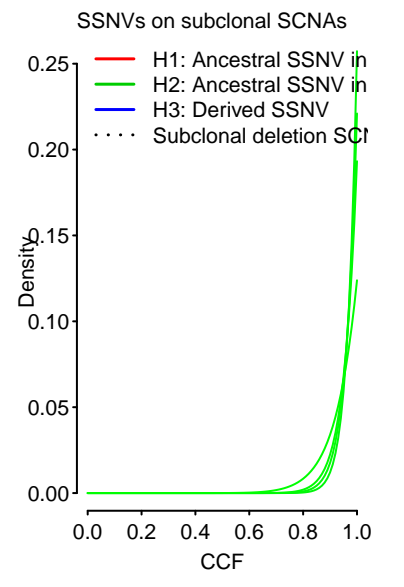

Sample 36

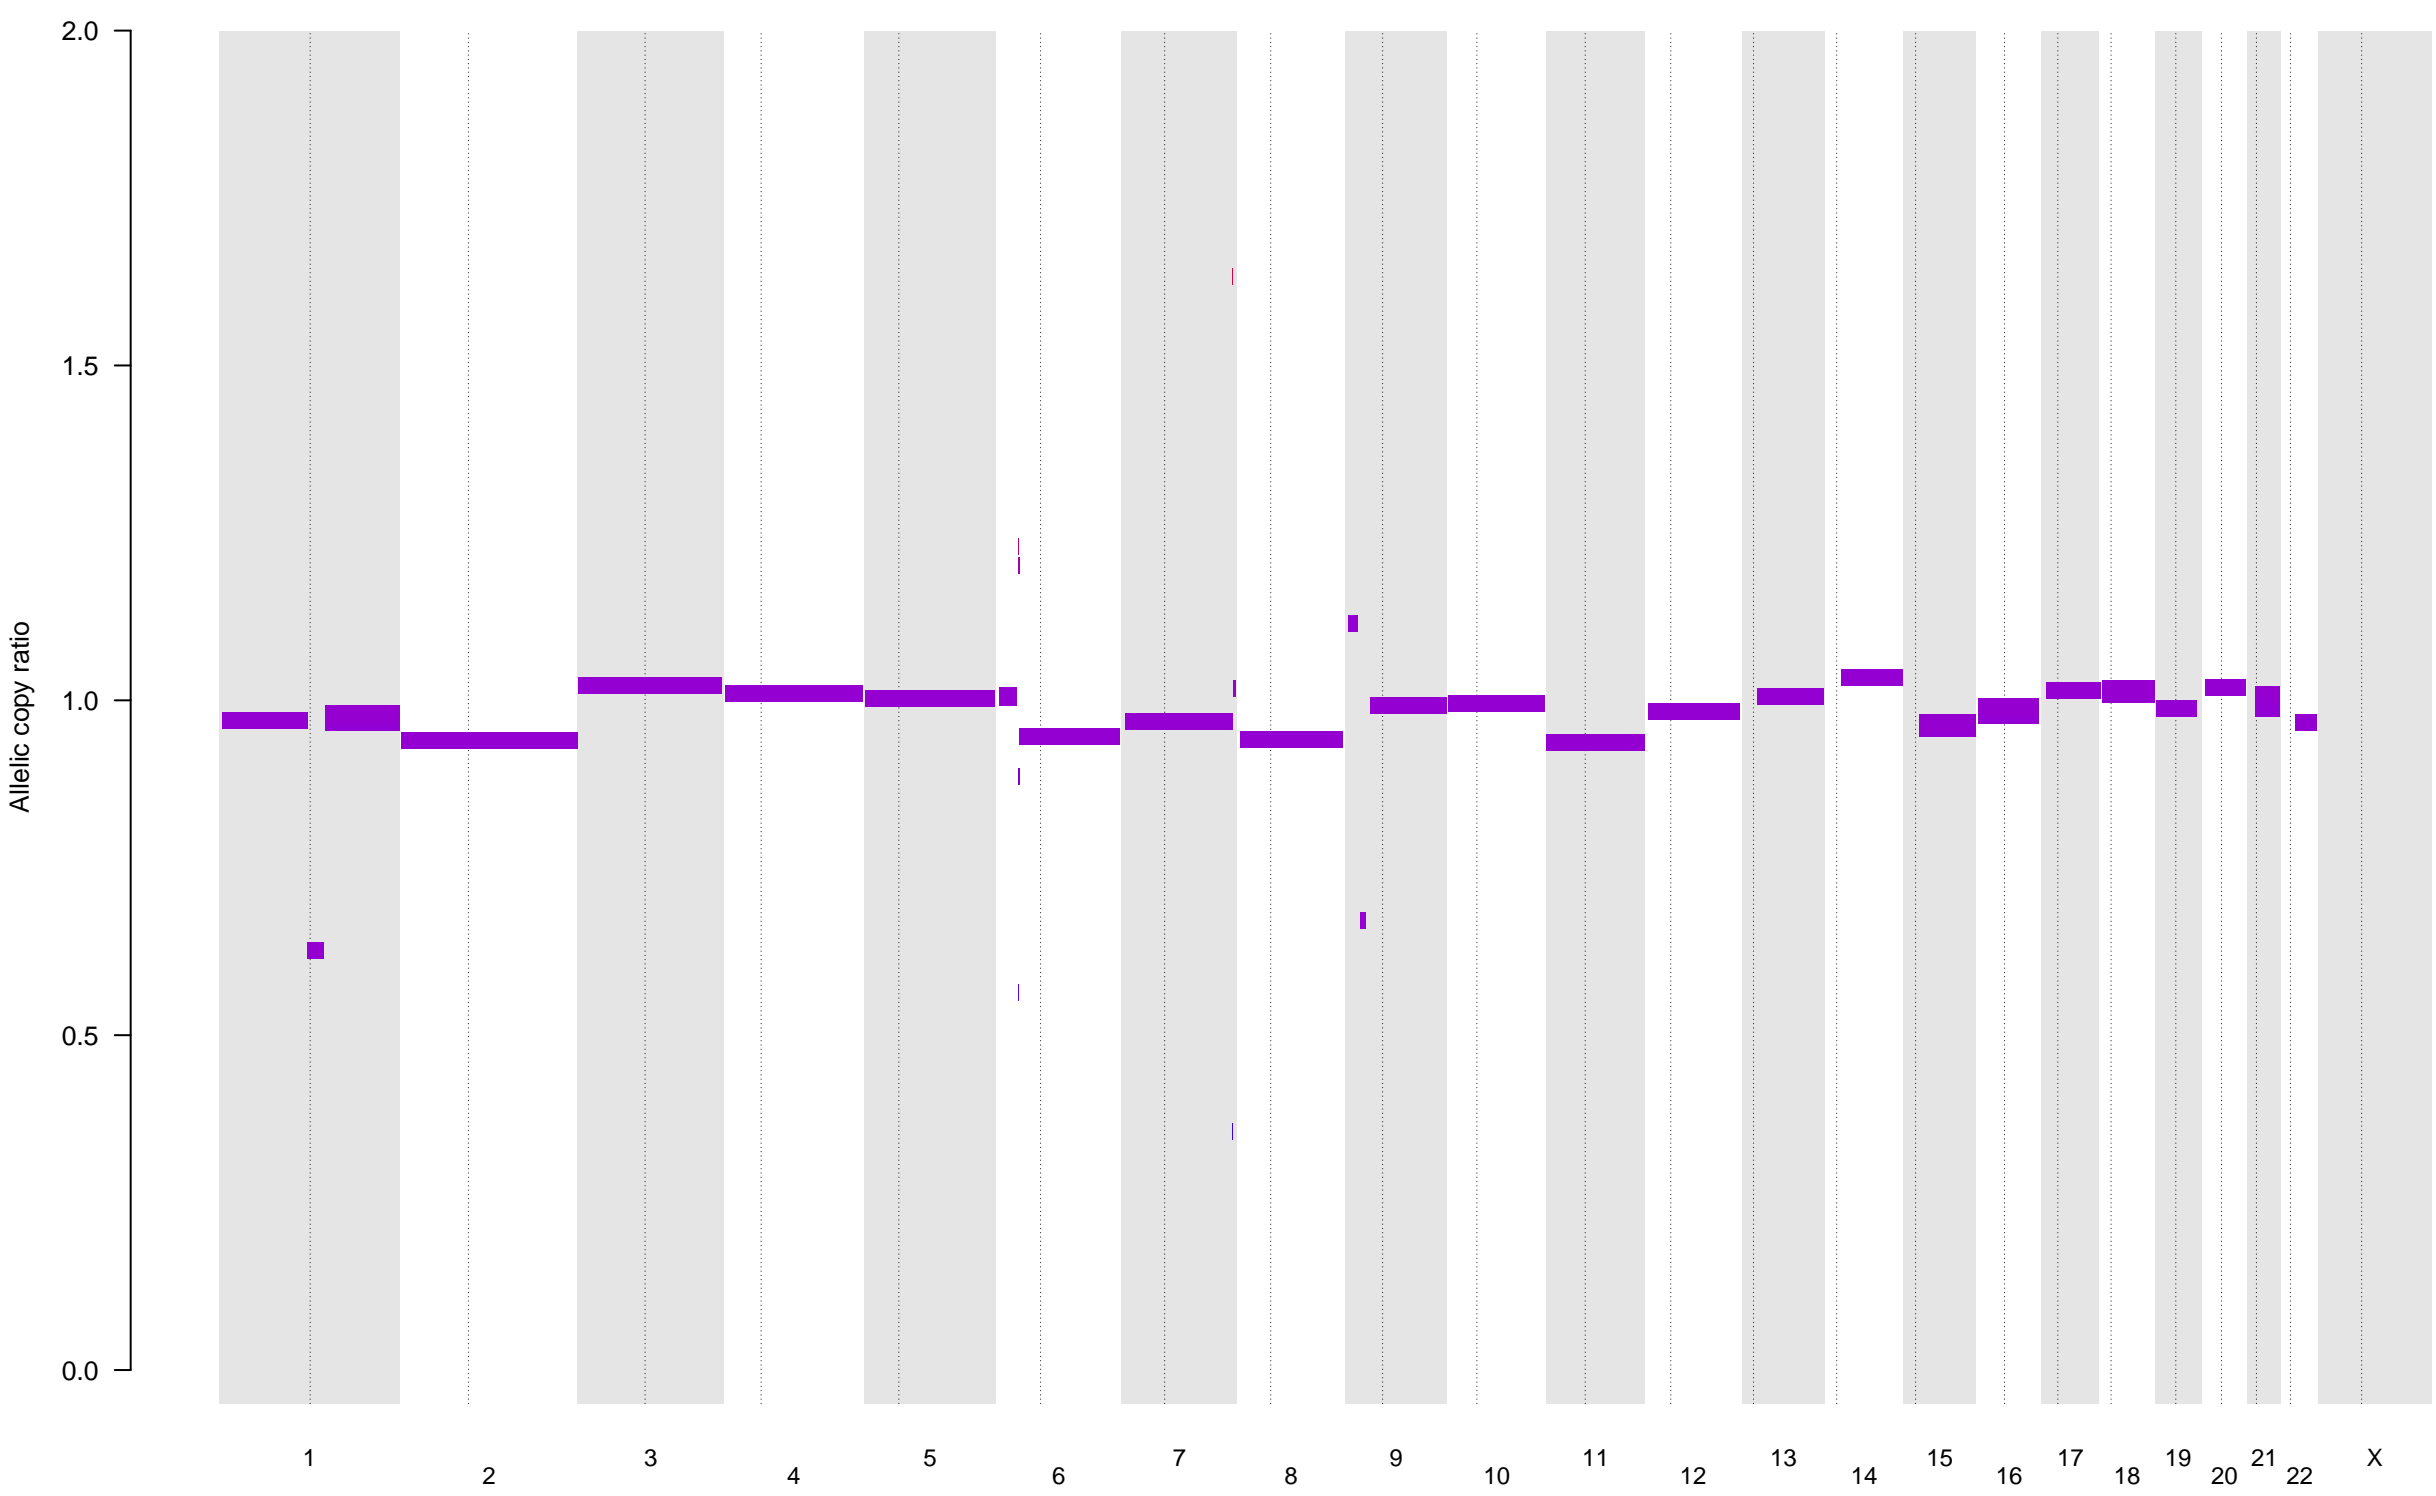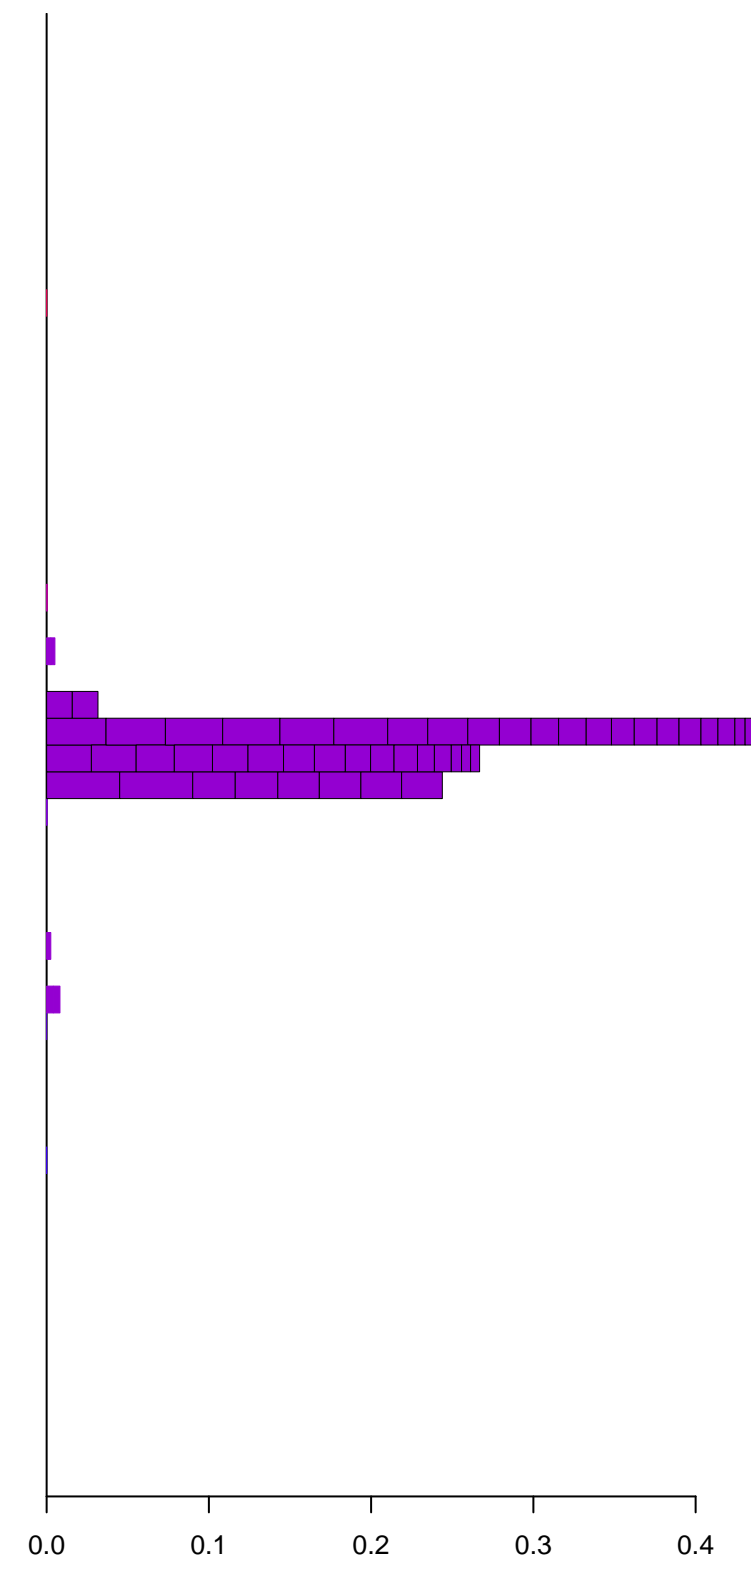

$\text{purity}(\hat{\alpha}) = 0.29$ , ploidy:  $\hat{\tau} = 2.09$ ,  $\hat{\tau}_g = 1.98$   
 $\theta_z = 0.32$ ,  $\theta_a = 1.237$ , WGD=0  
 SCNA LL = -214.69, SSNV LL = -6016.89, SCNA Ev = -105.7433

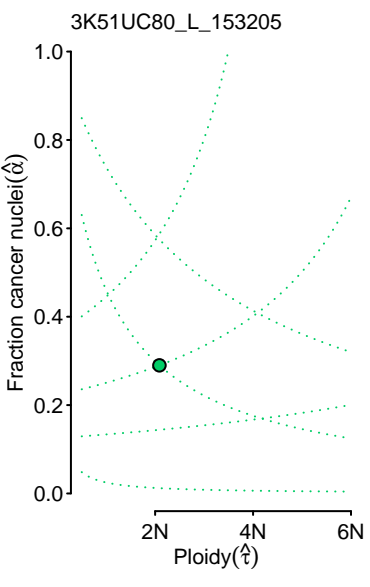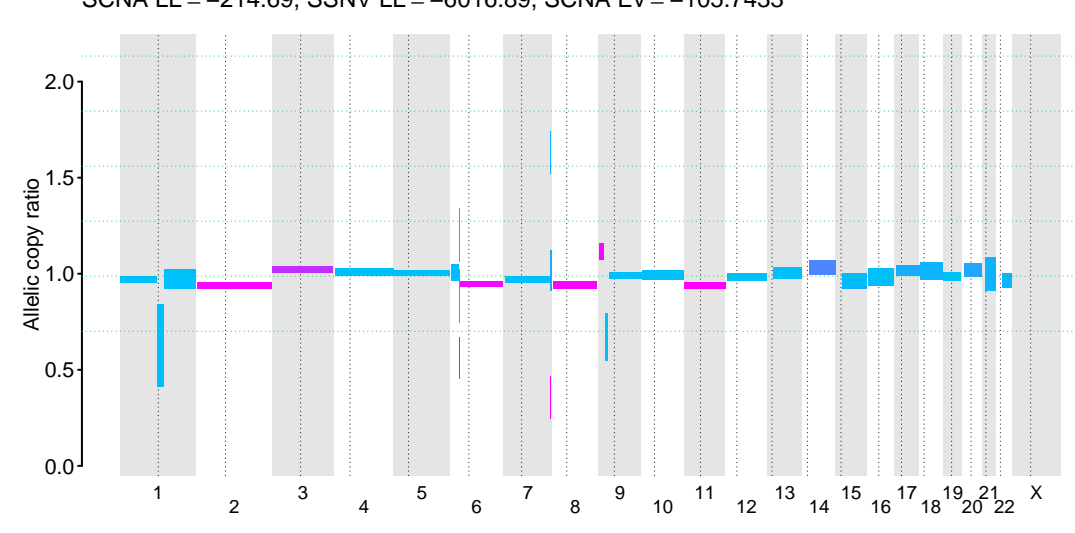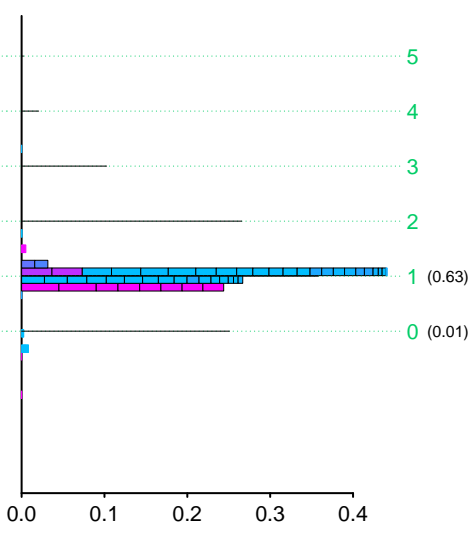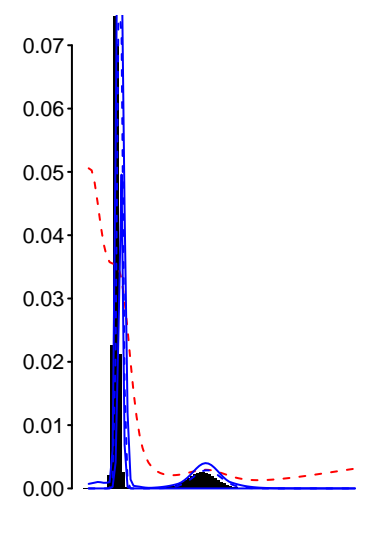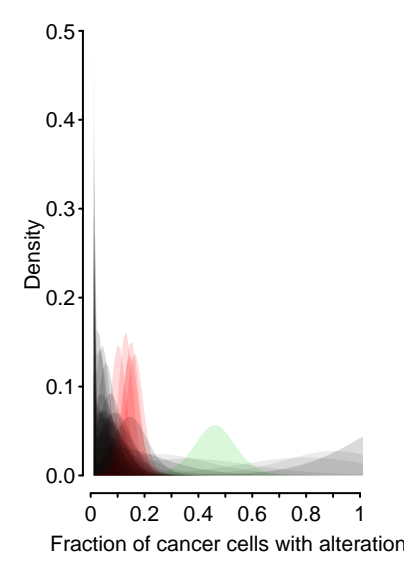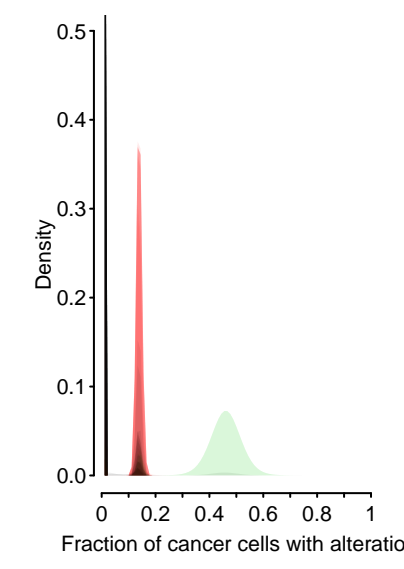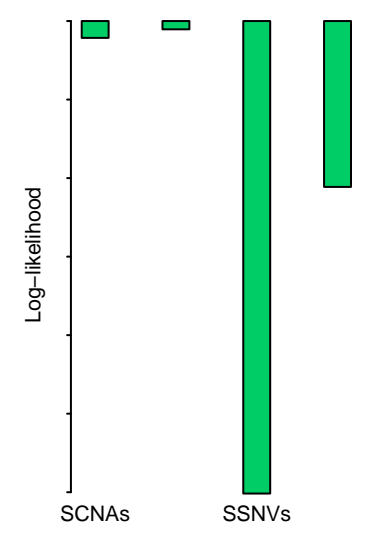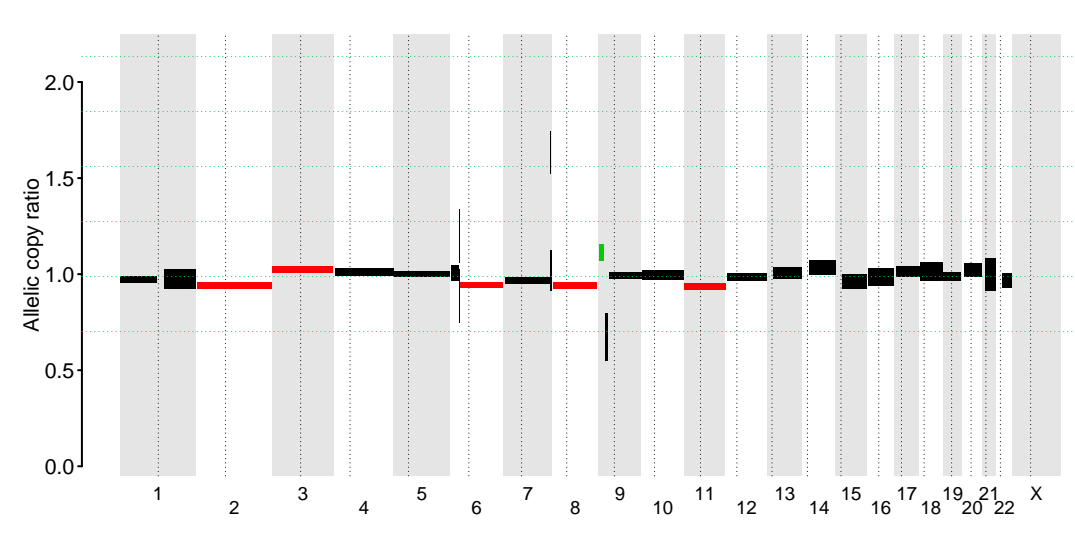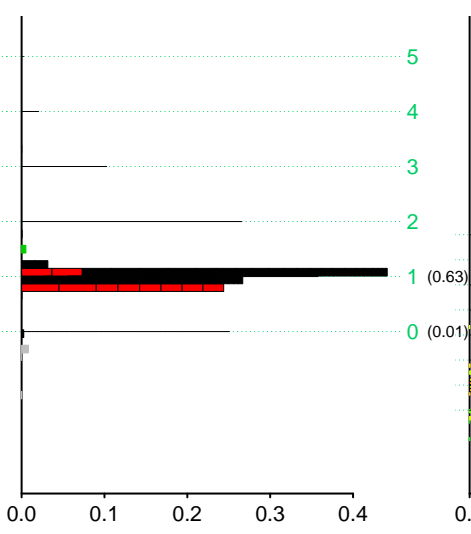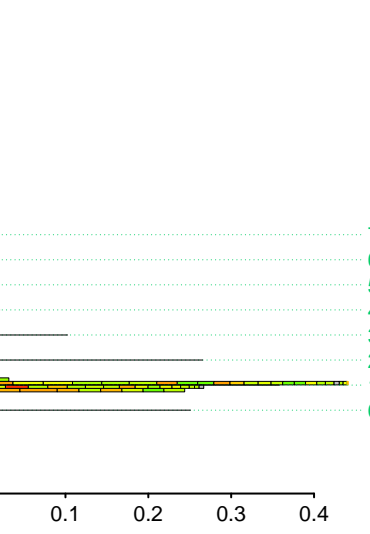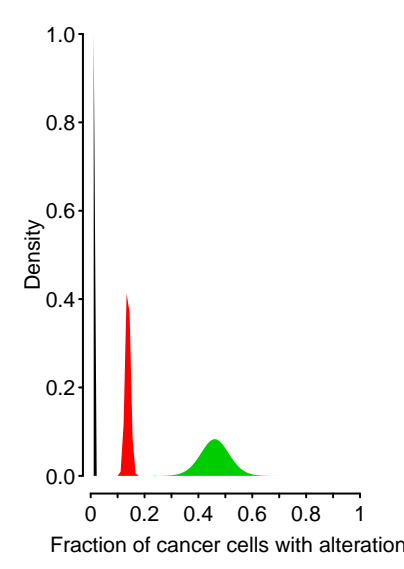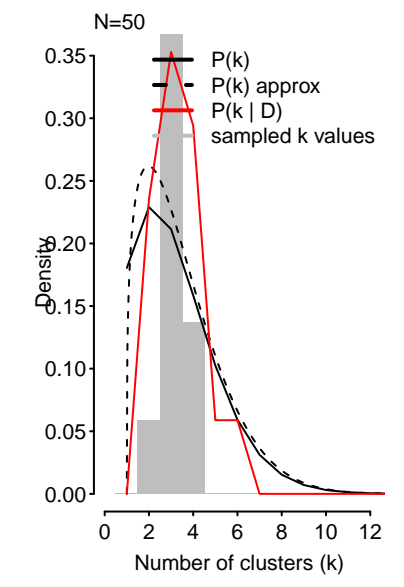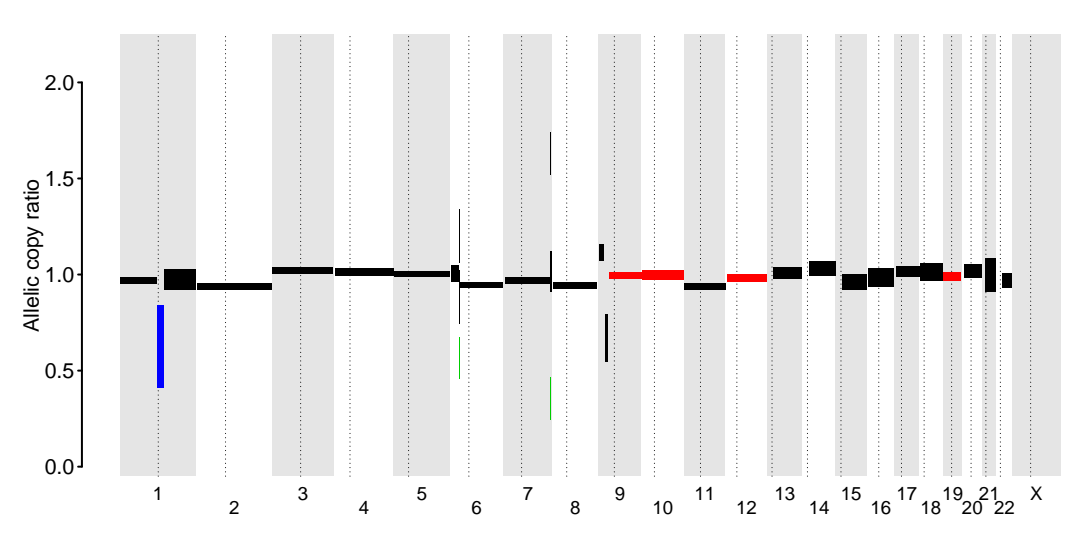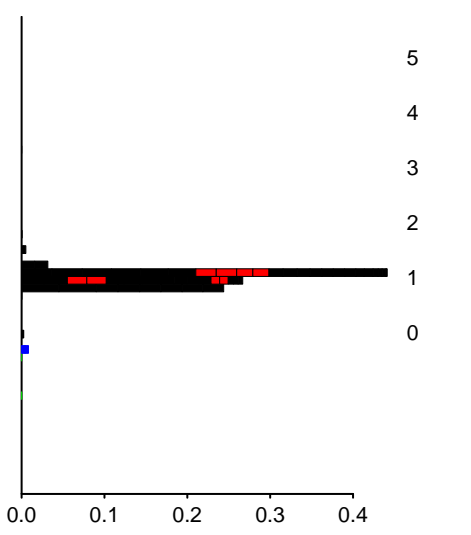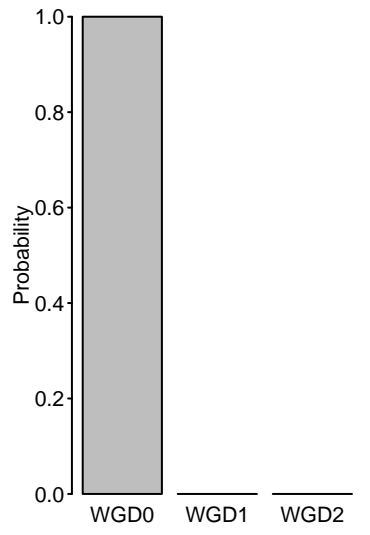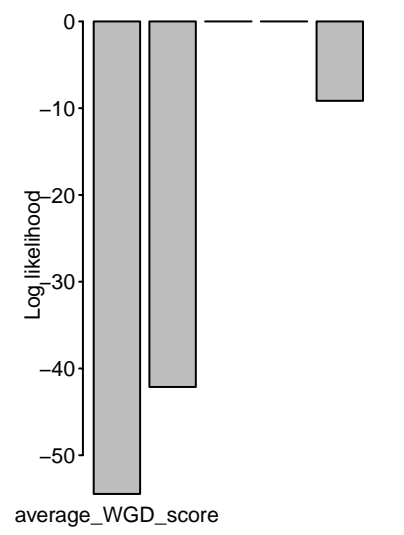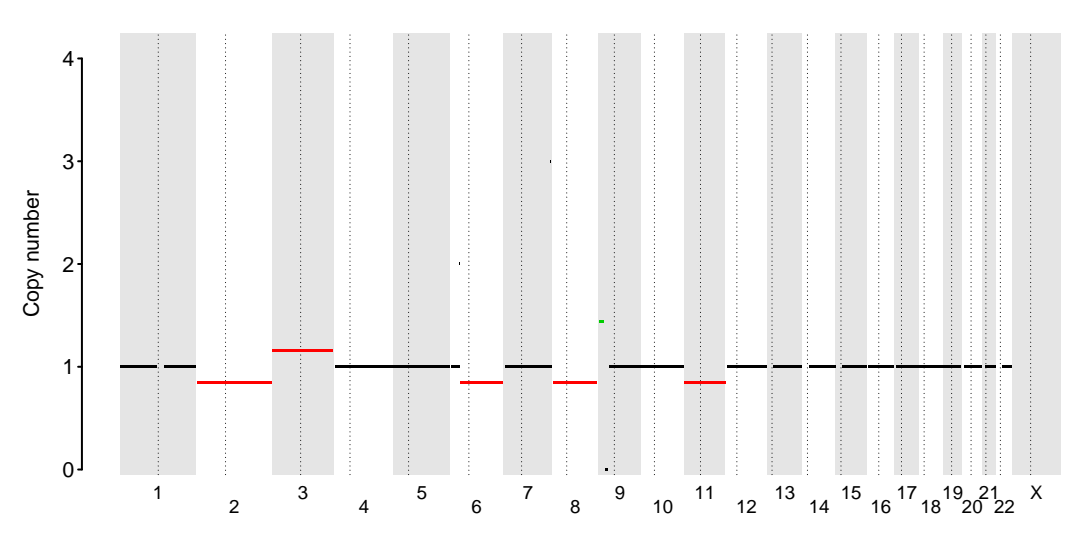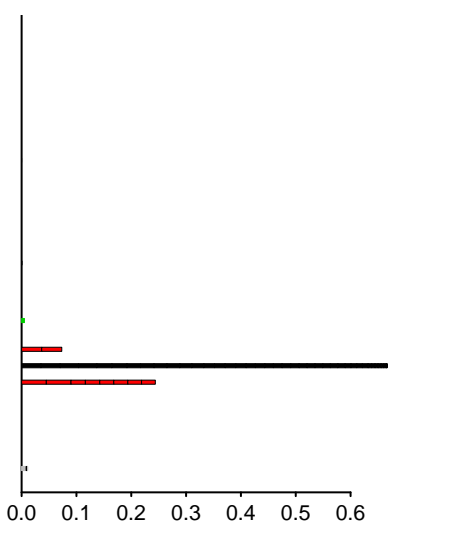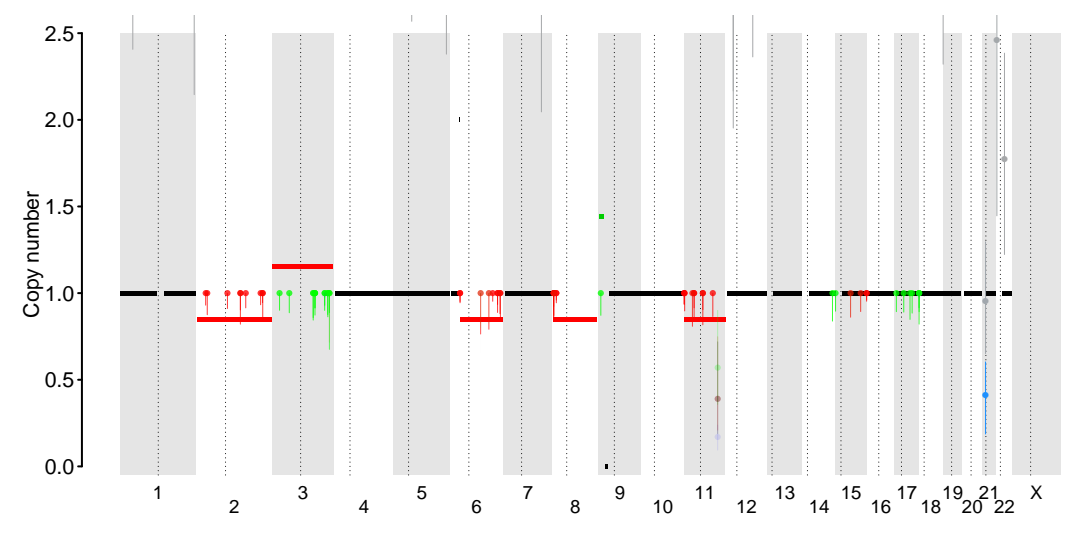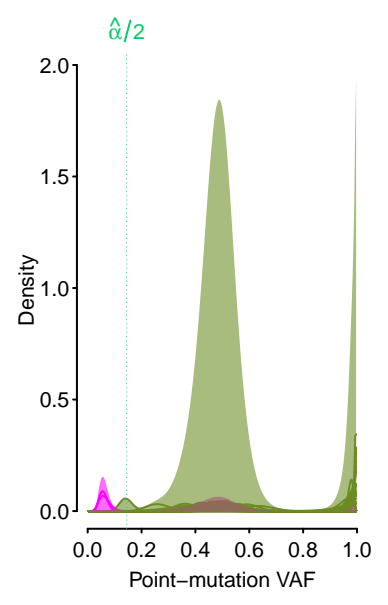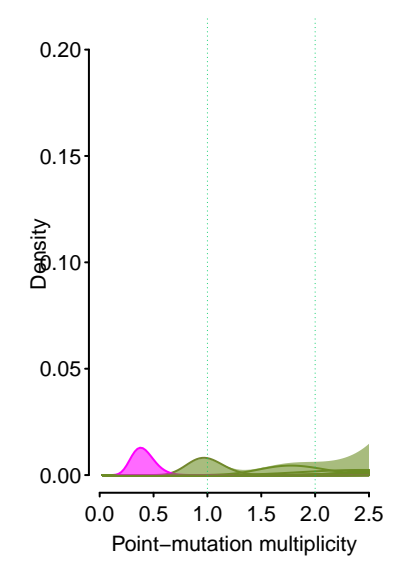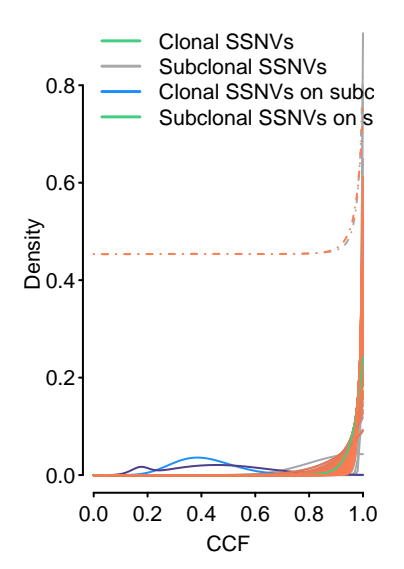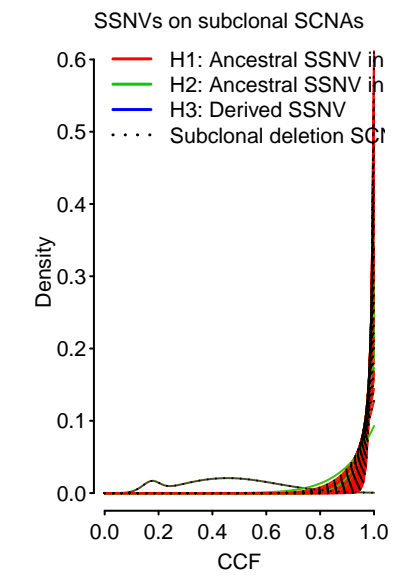

Sample 39

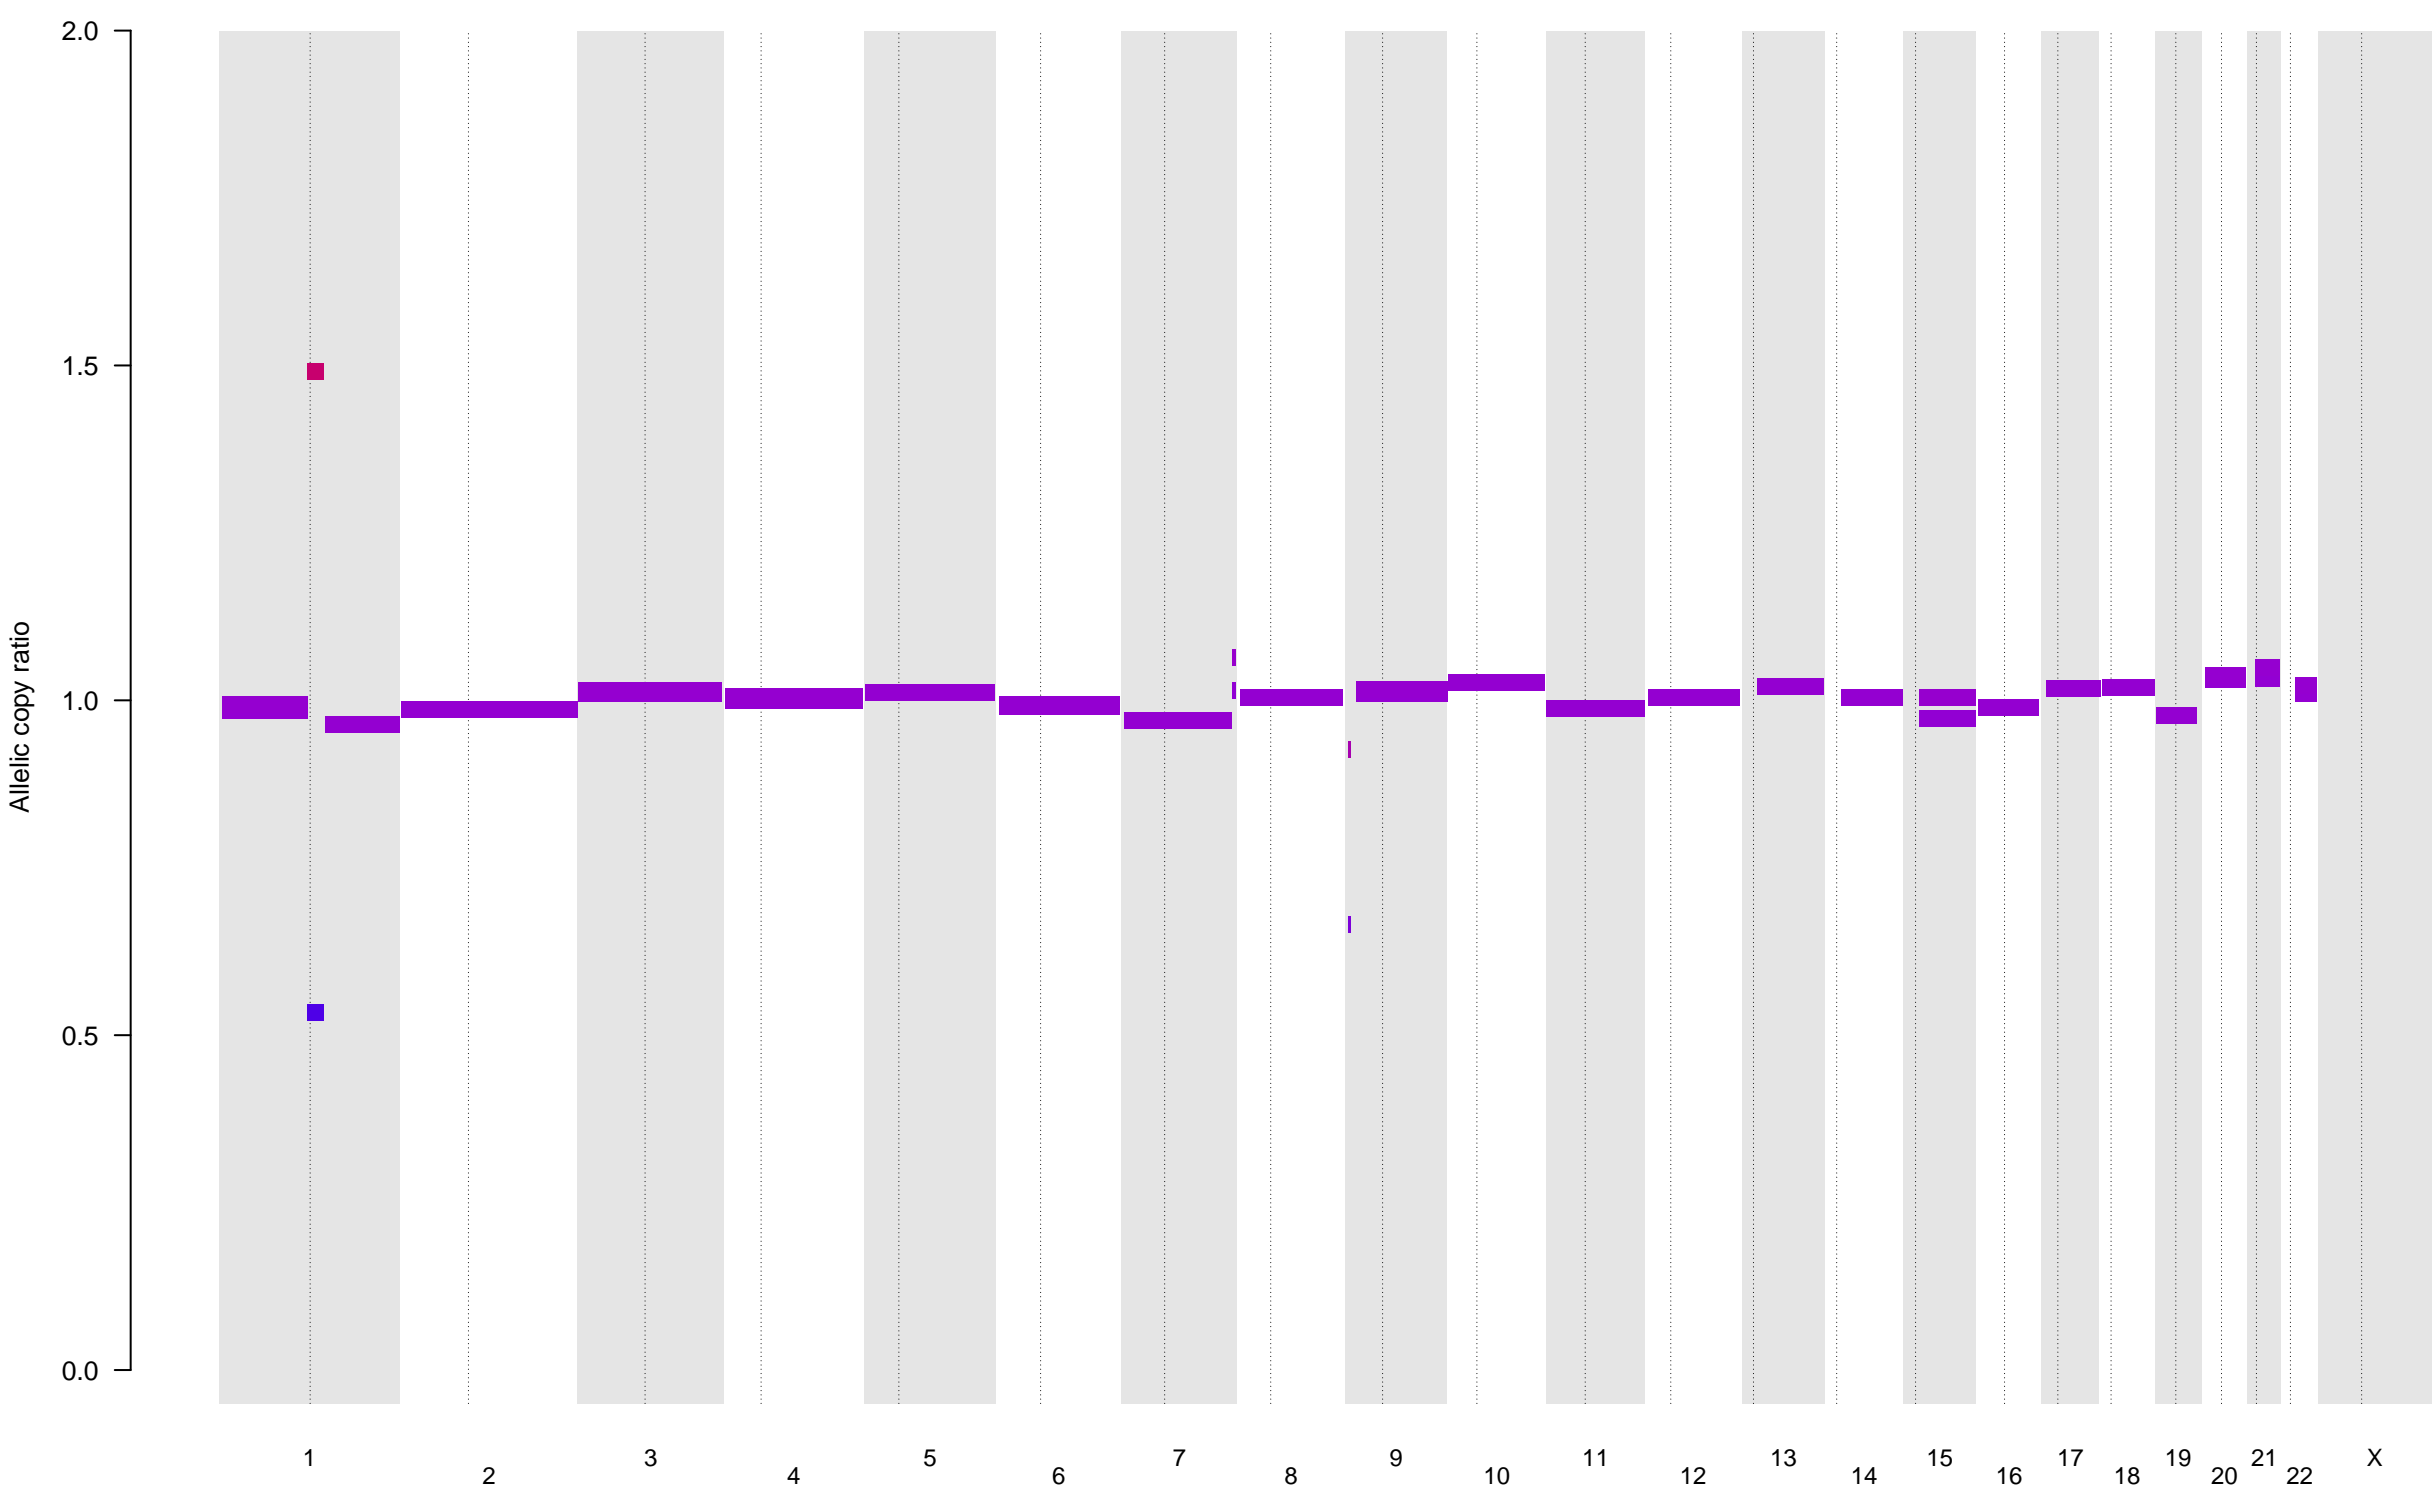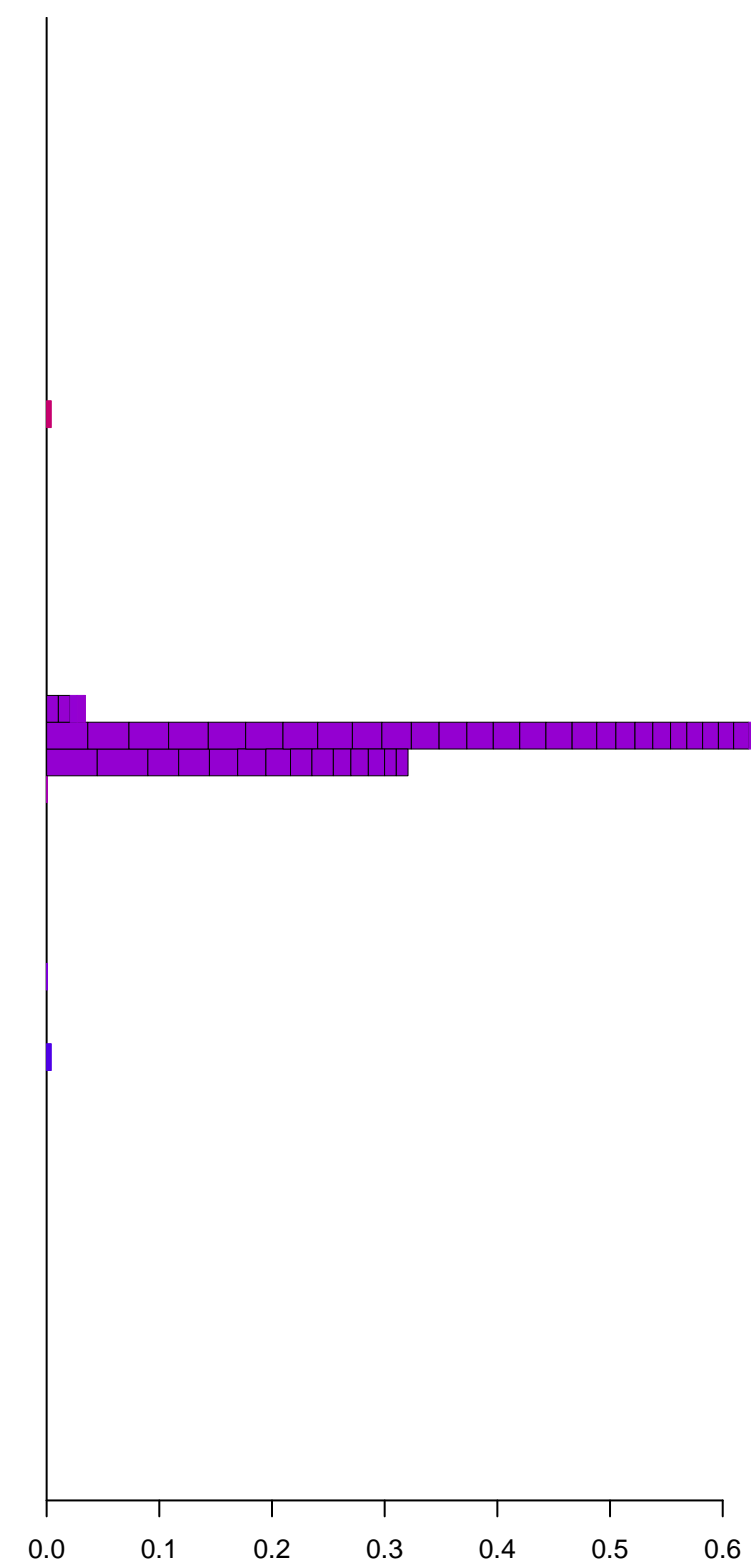

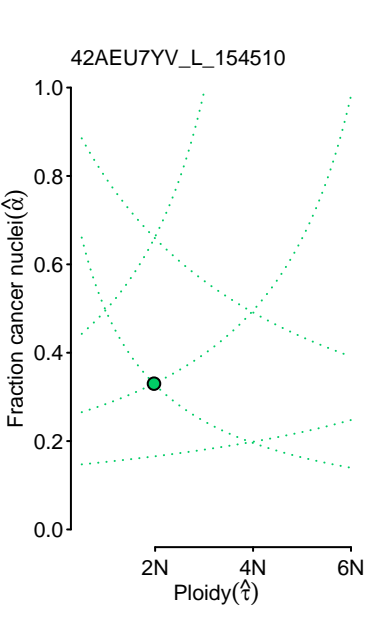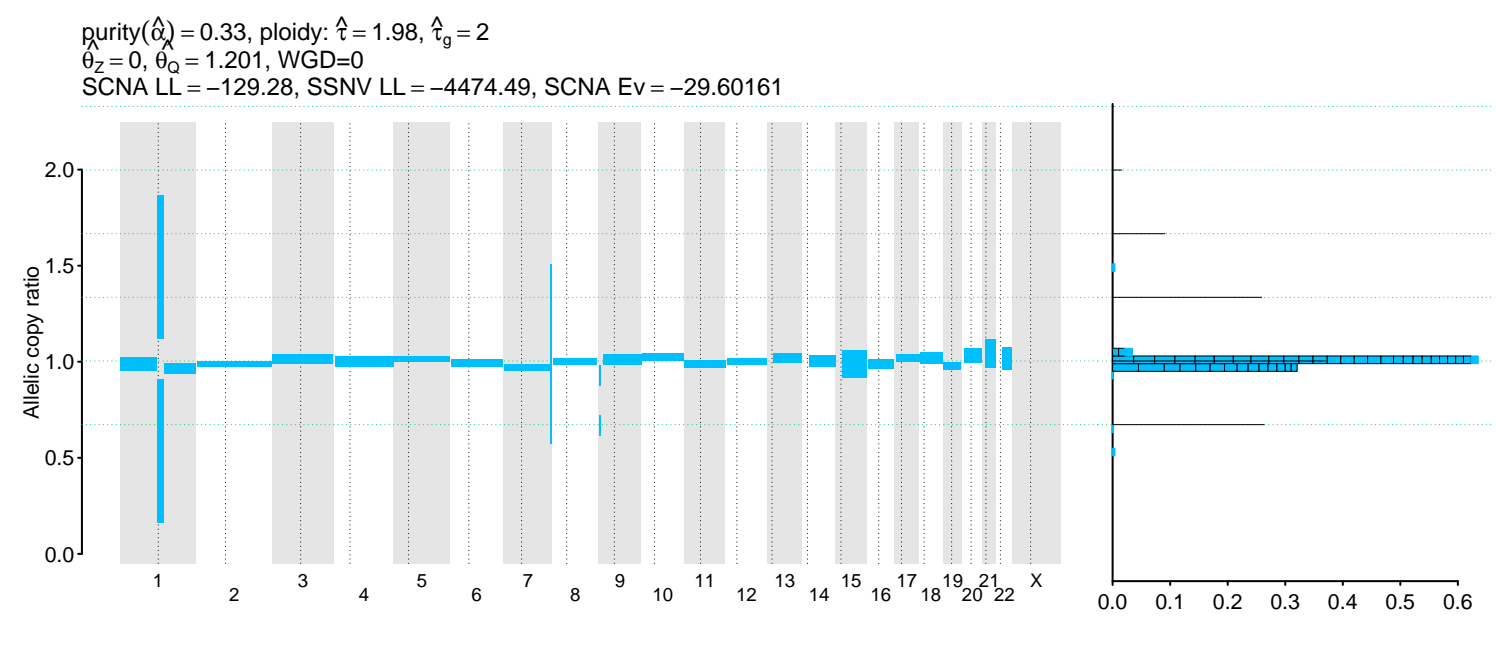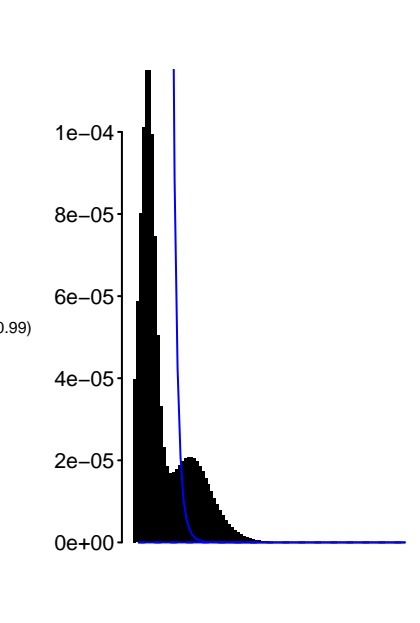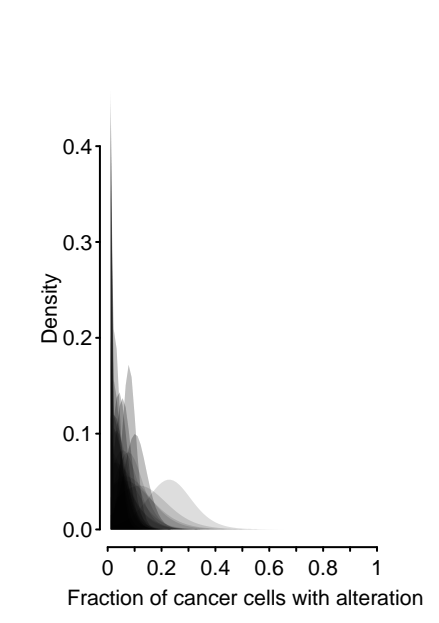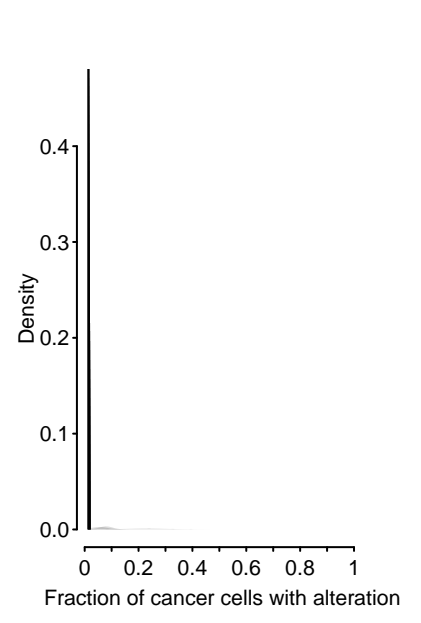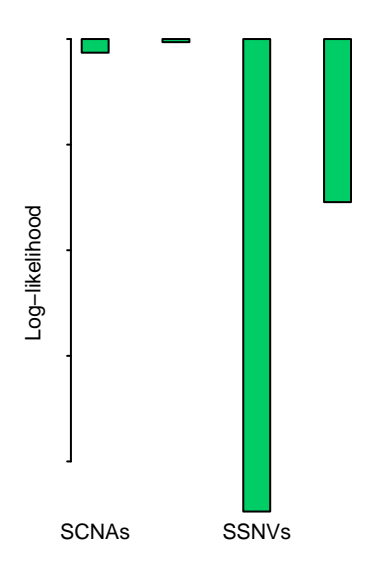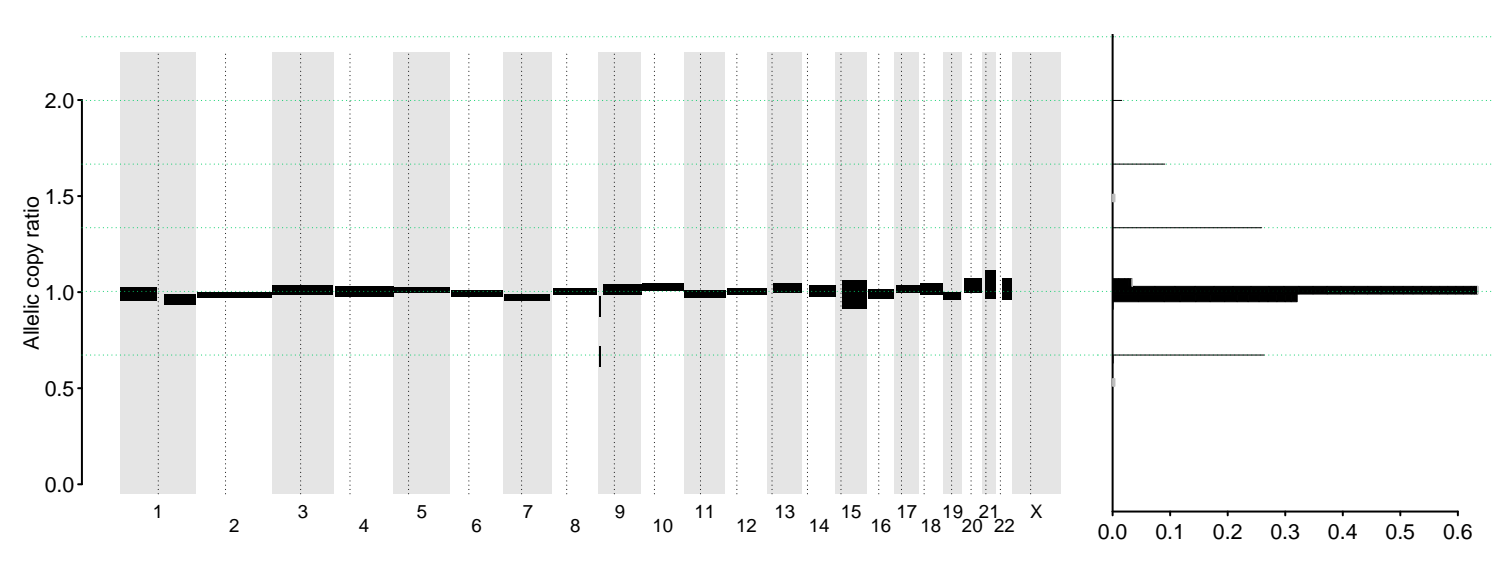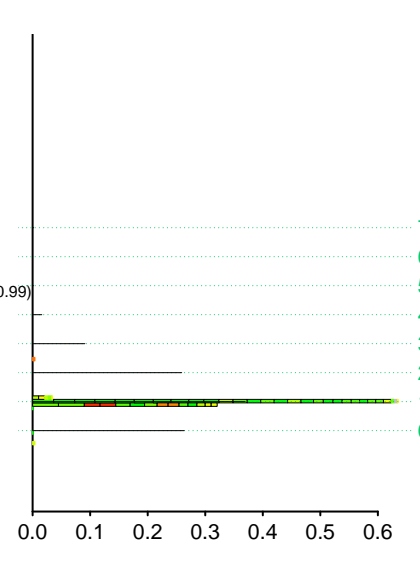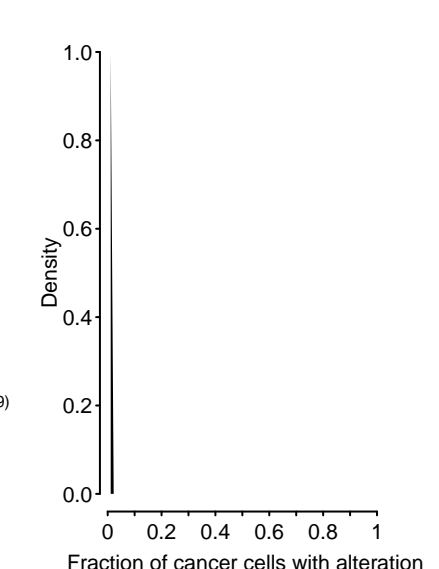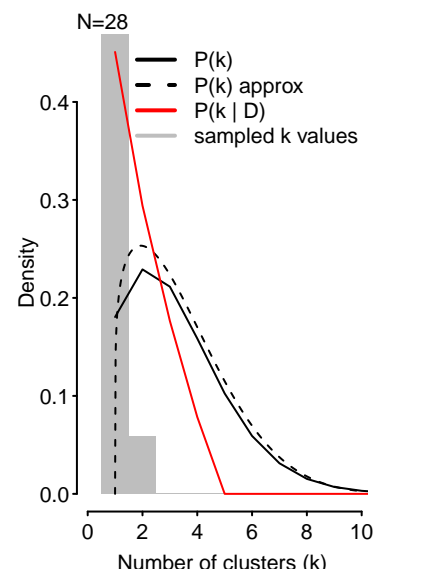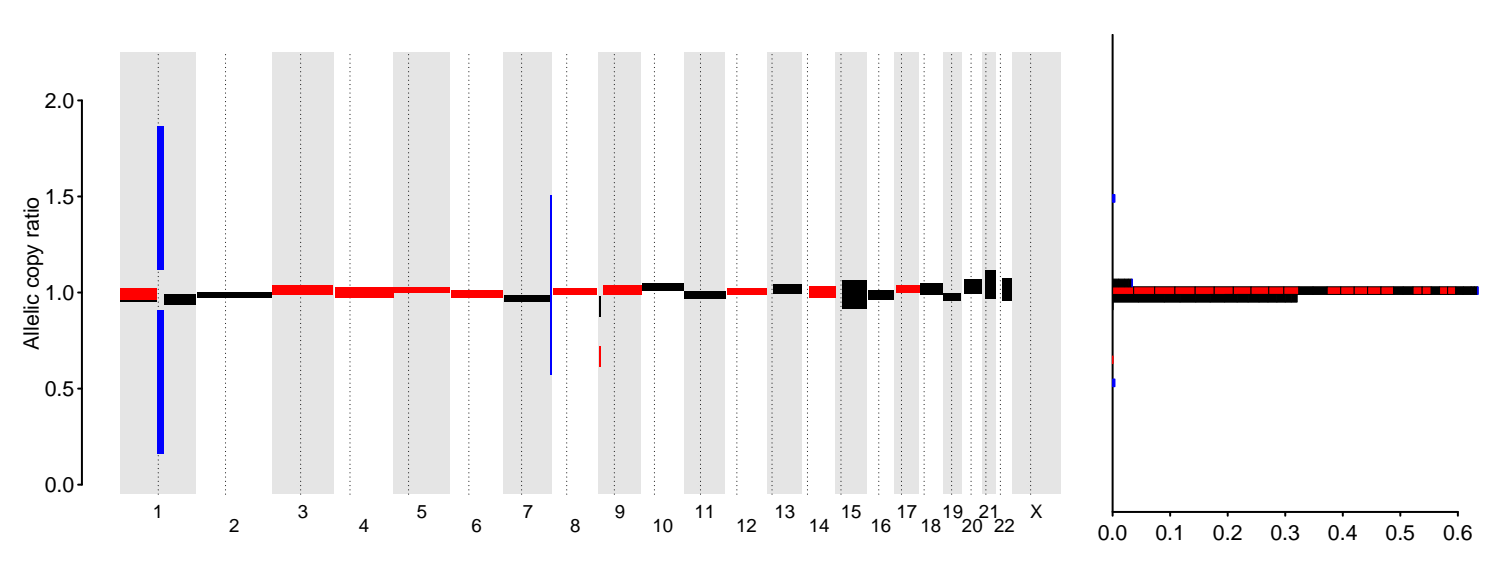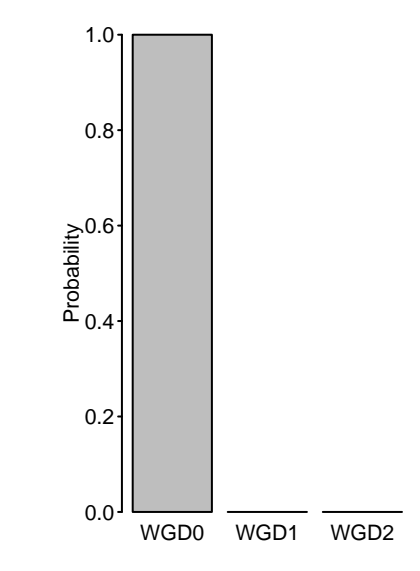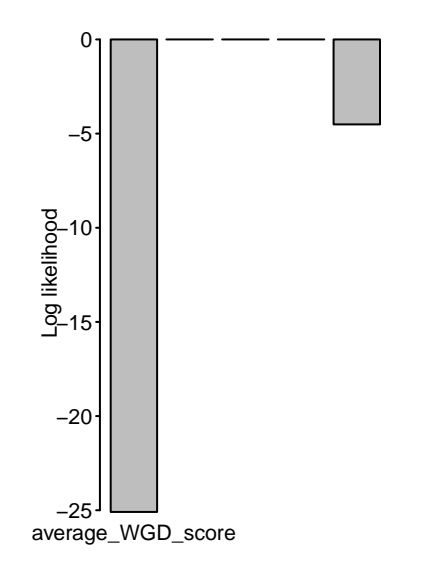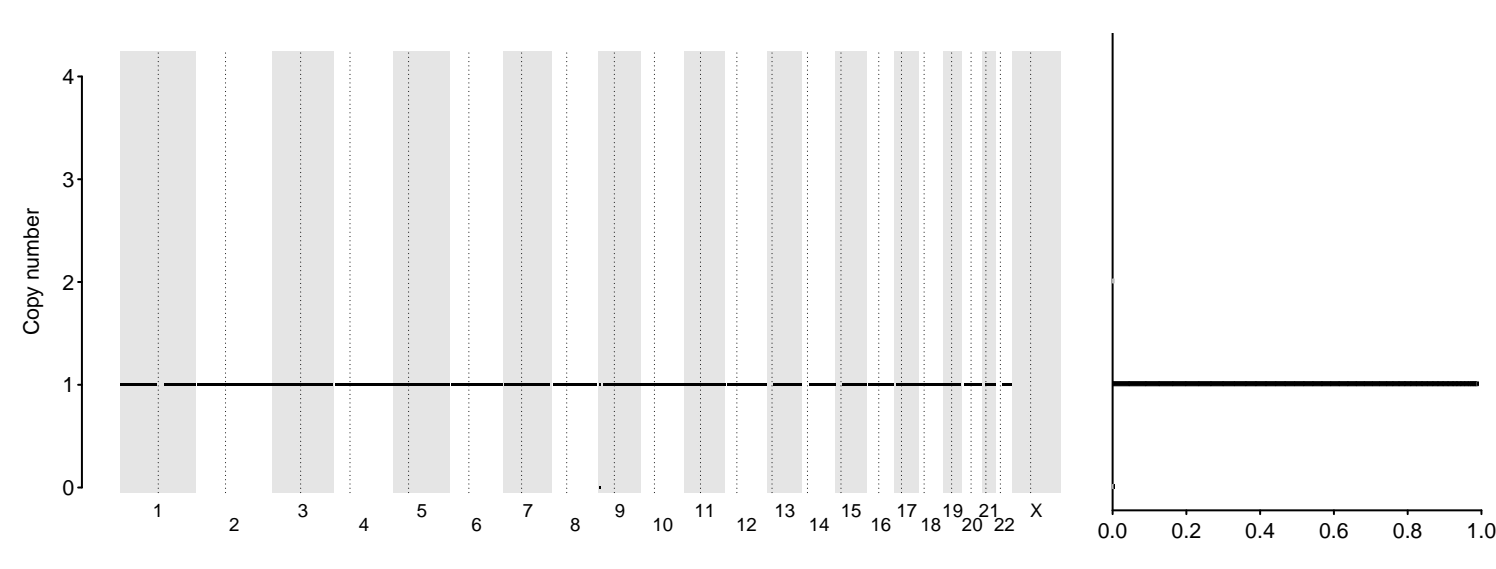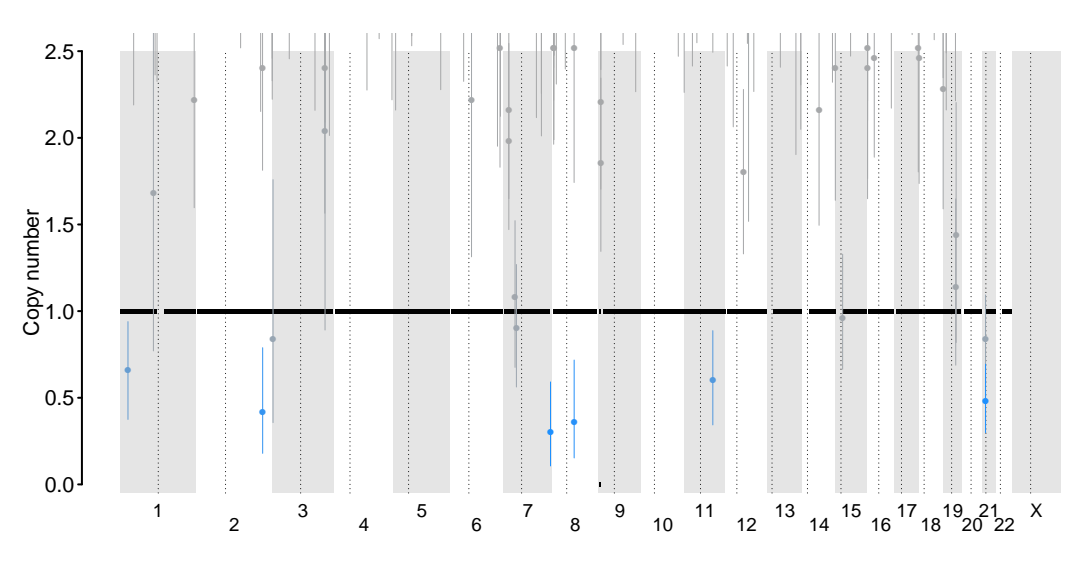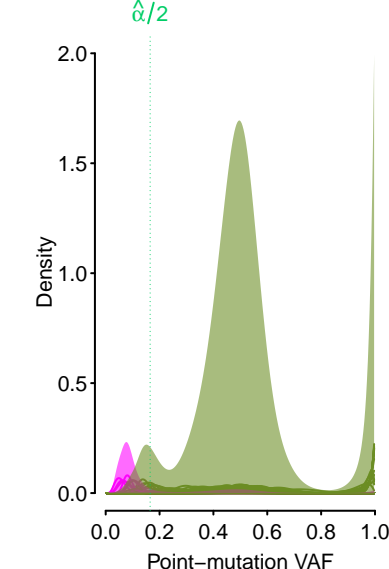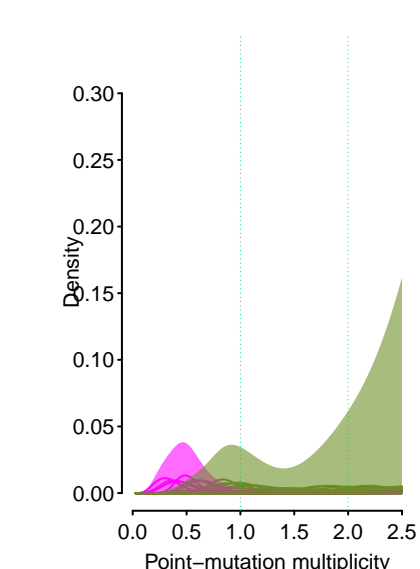

Sample 40

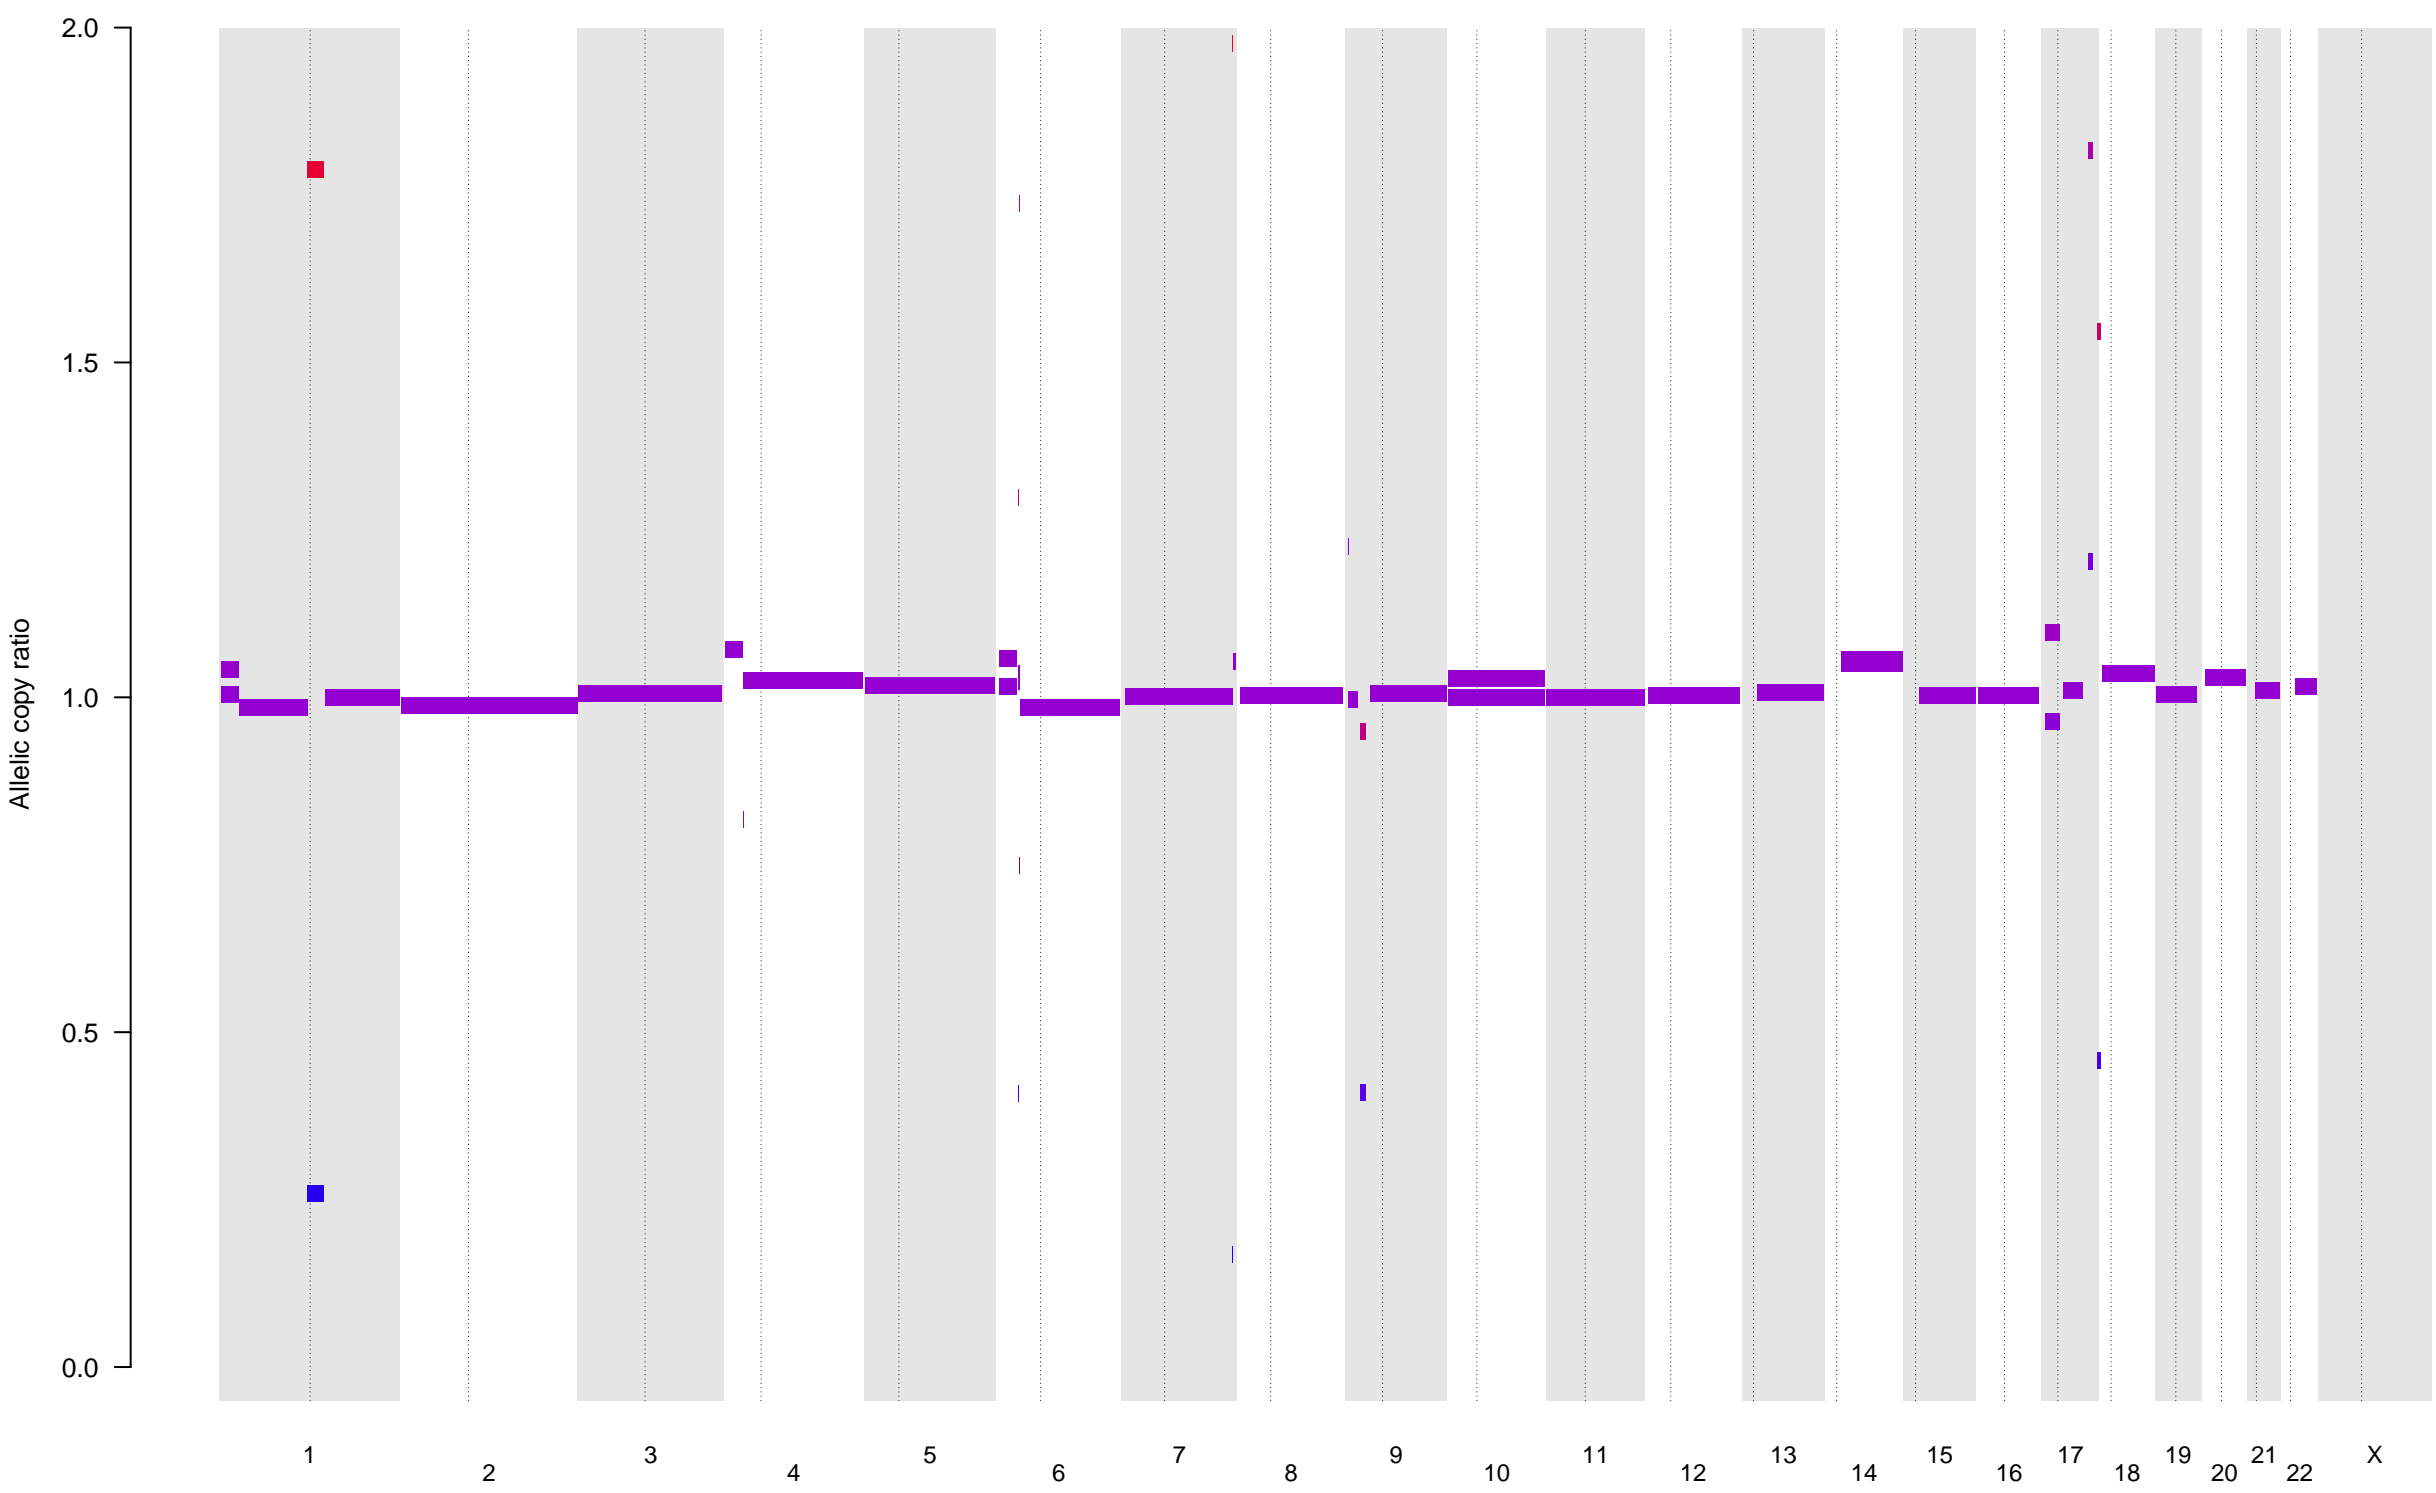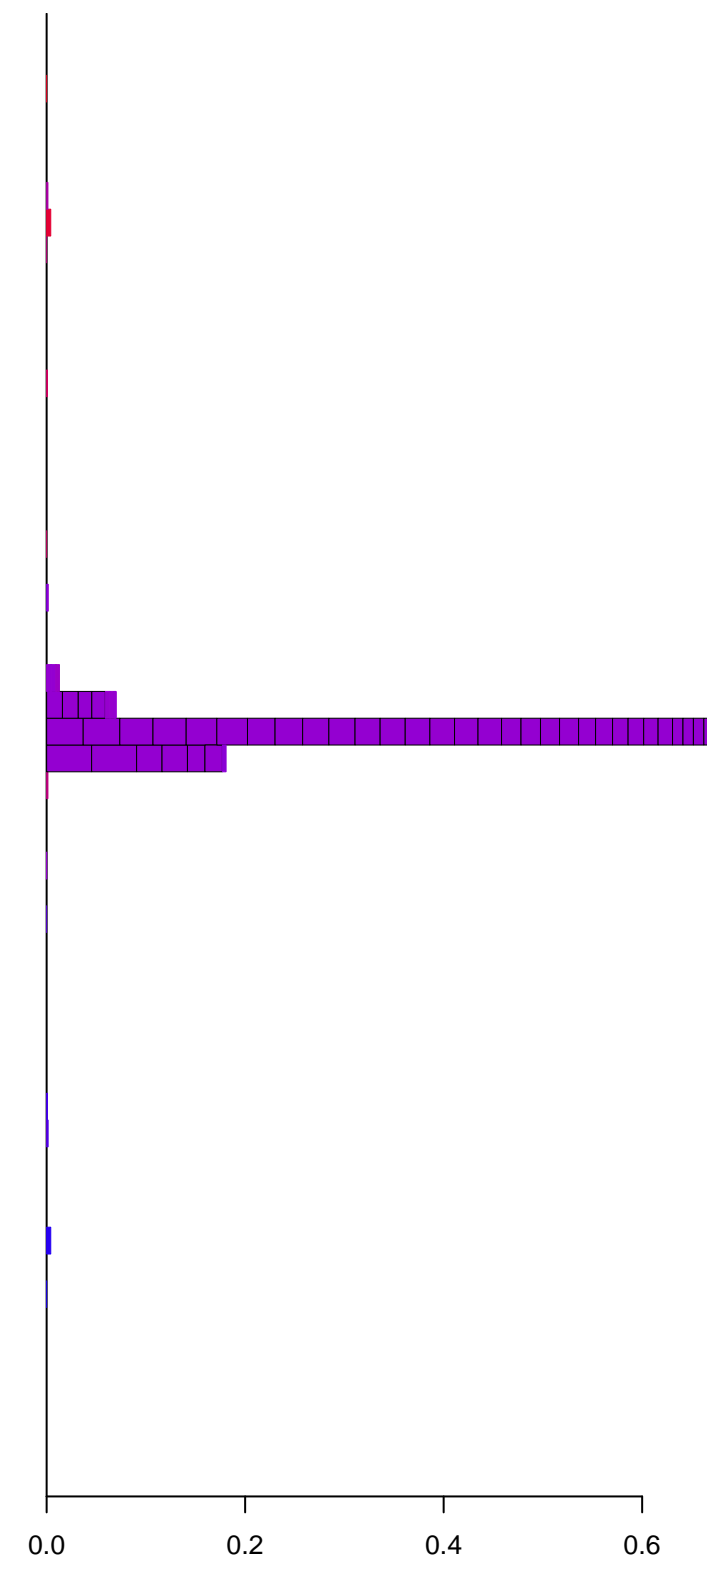

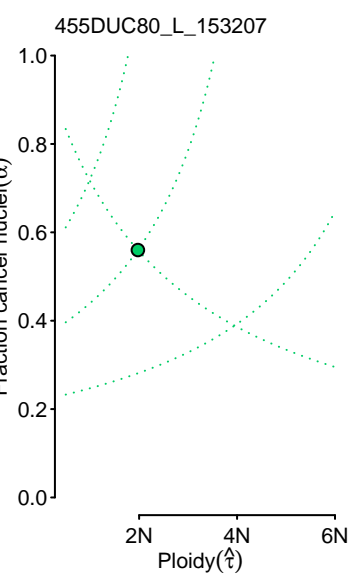

purity( $\hat{\lambda}$ ) = 0.56, ploidy:  $\hat{t} = 1.97$ ,  $\hat{t}_g = 2$   
 $\theta_z = 0$ ,  $\theta_0 = 1.264$ , WGD=0  
 SCNA LL = -180.2, SSNV LL = -4017.53, SCNA Ev = -31.02143

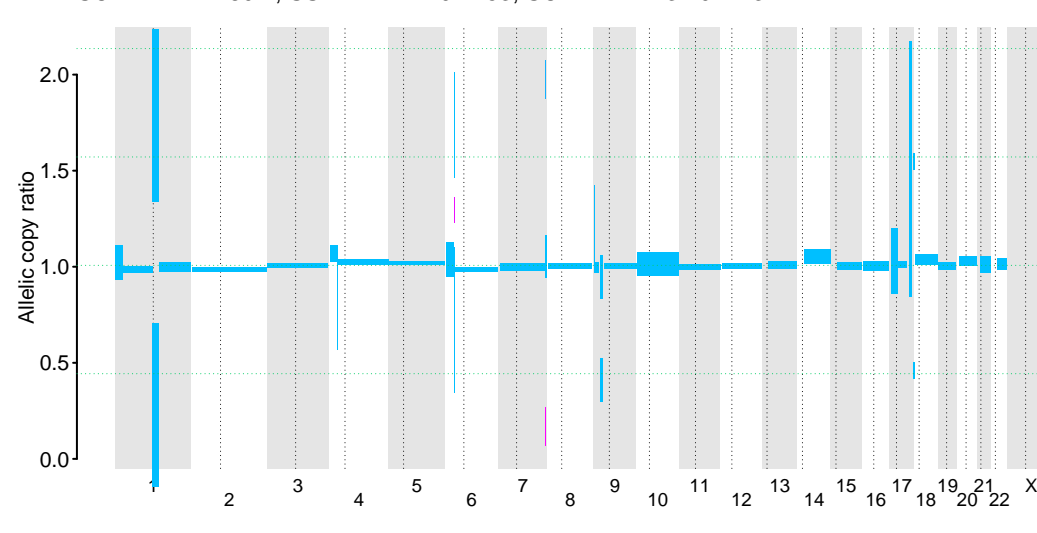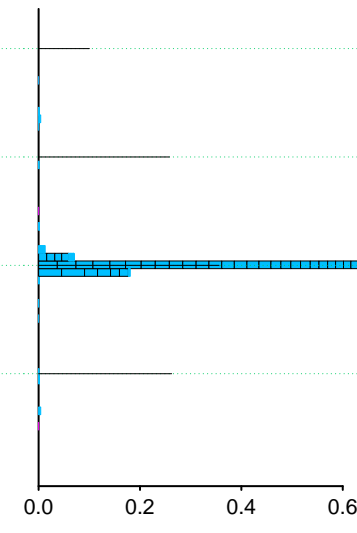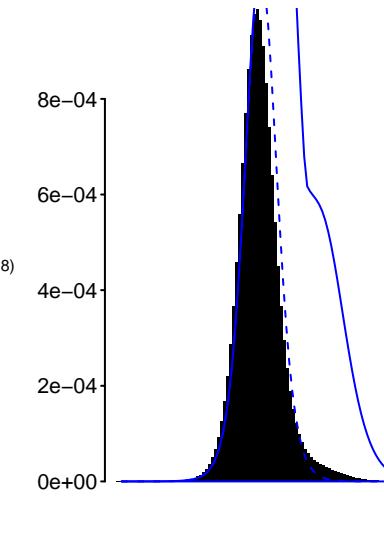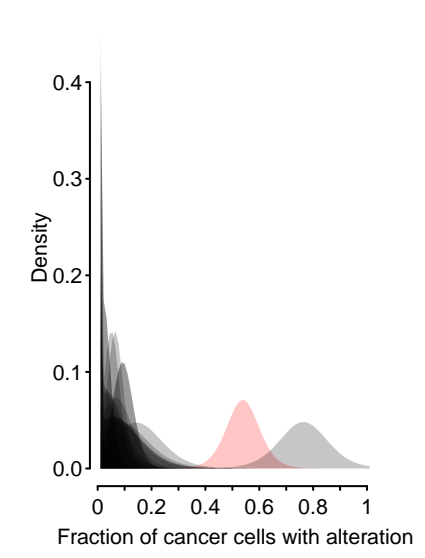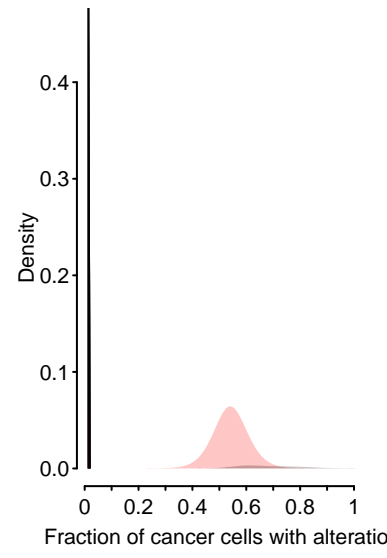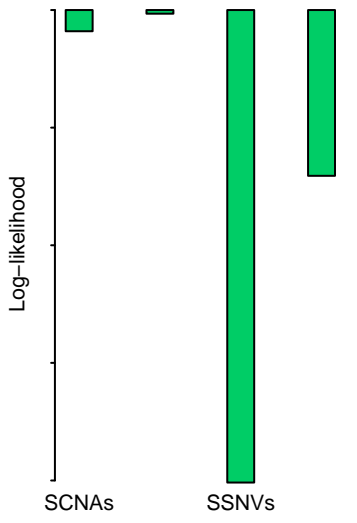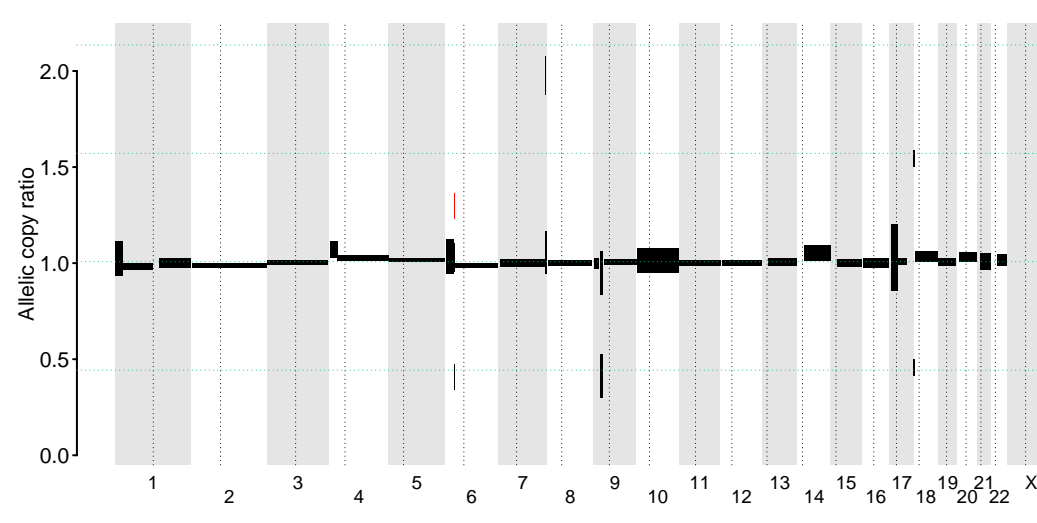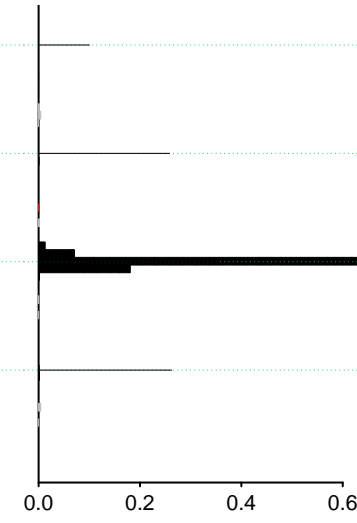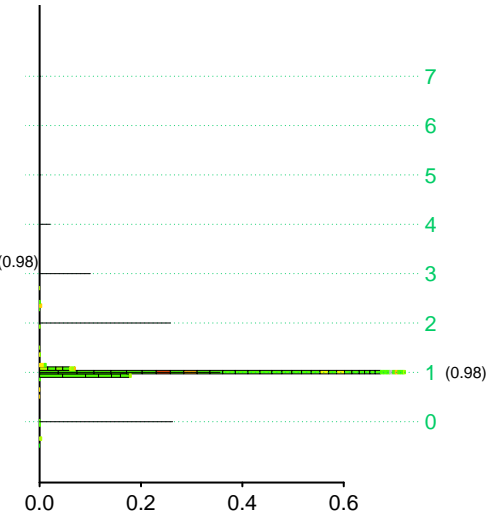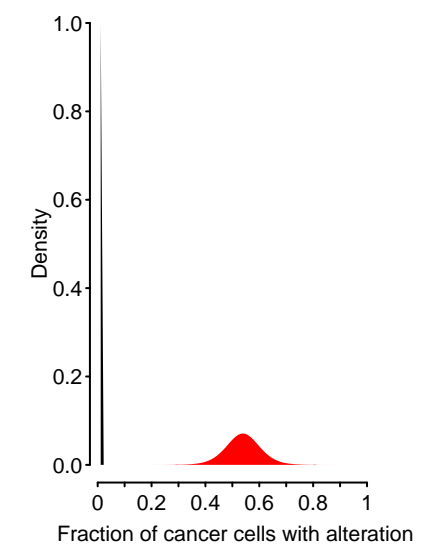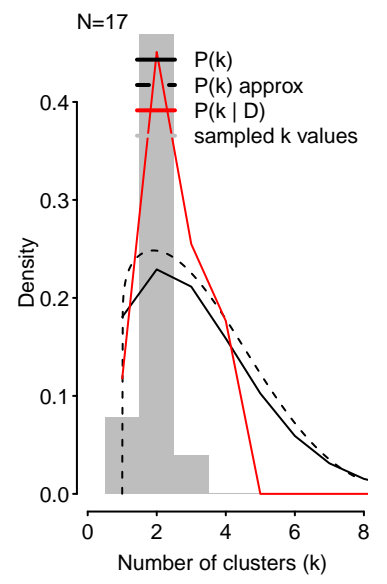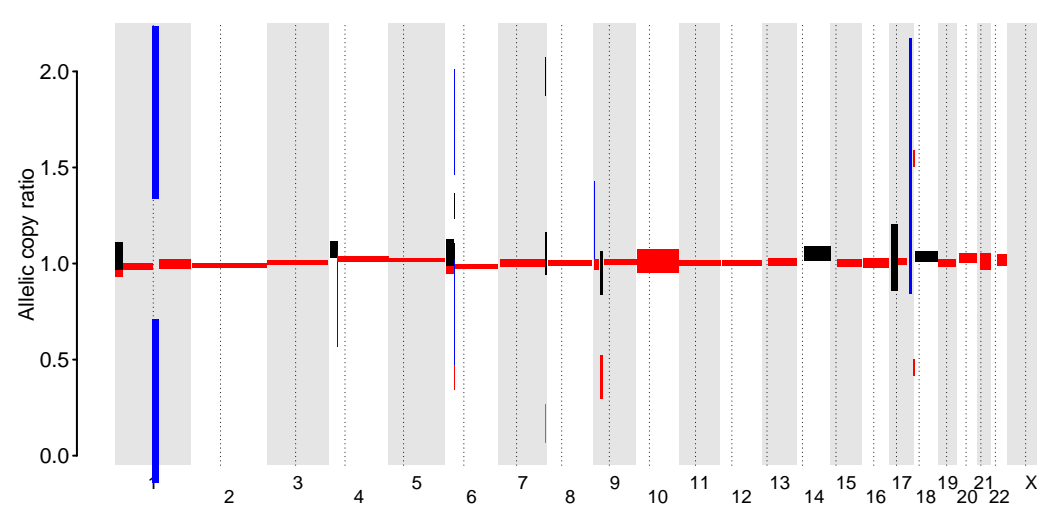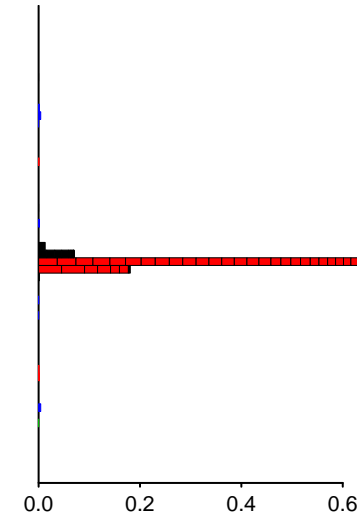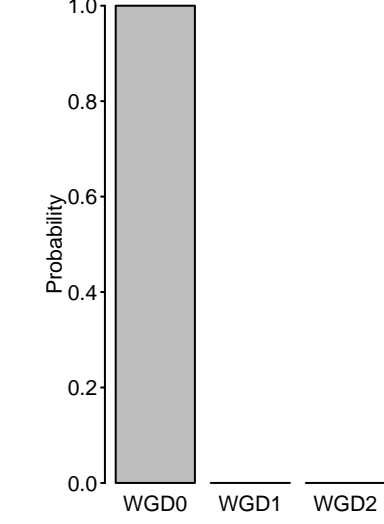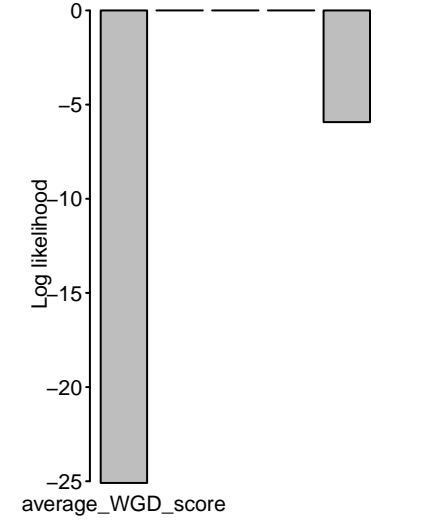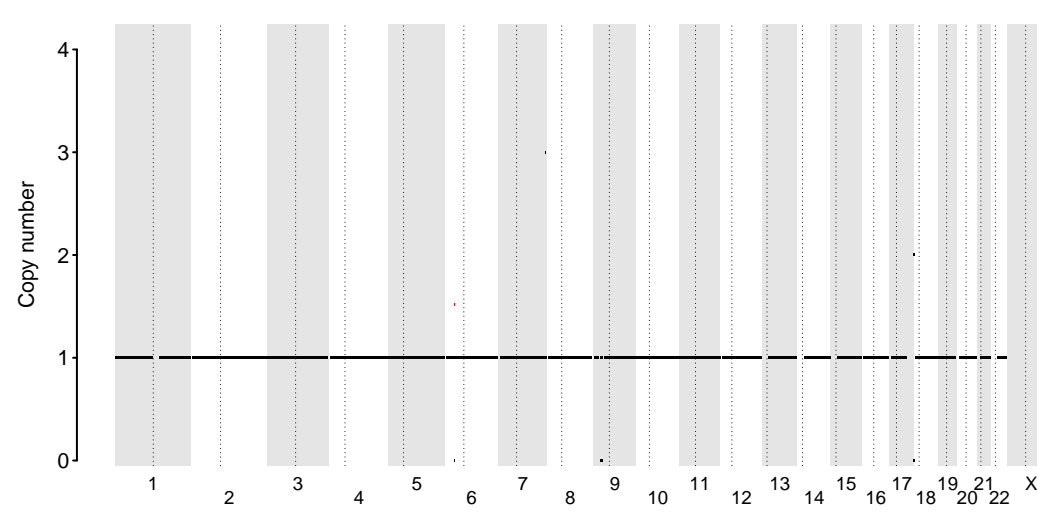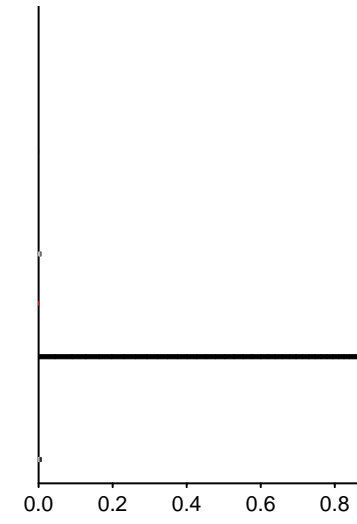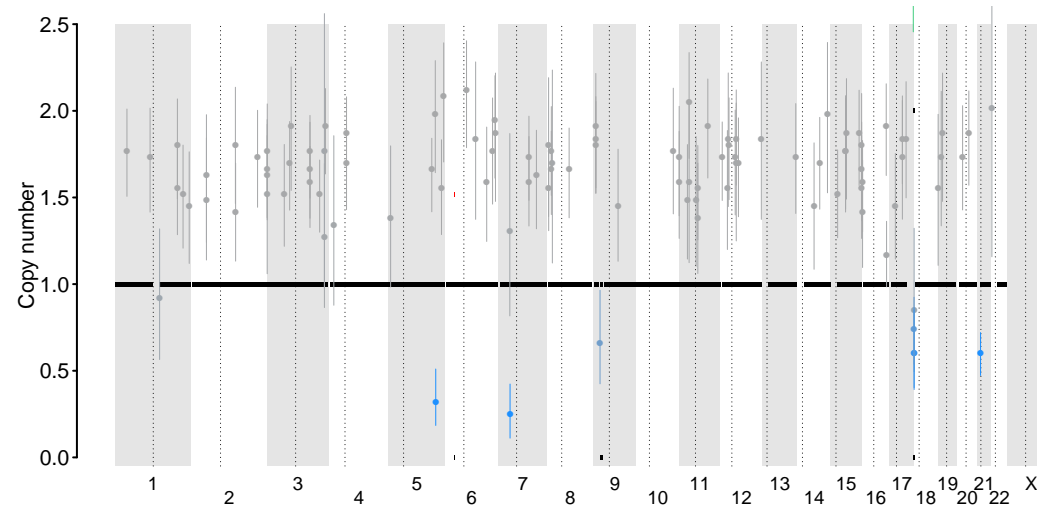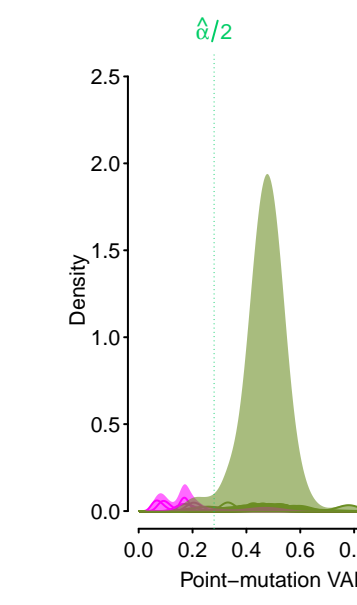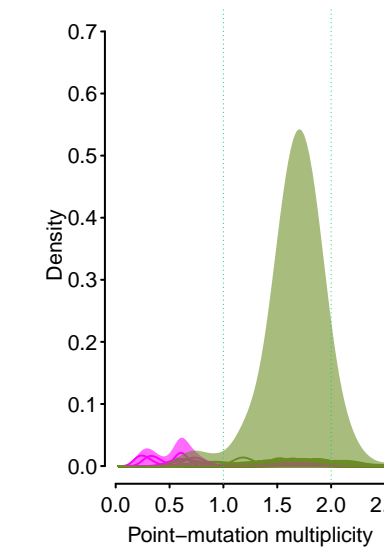



Sample 42

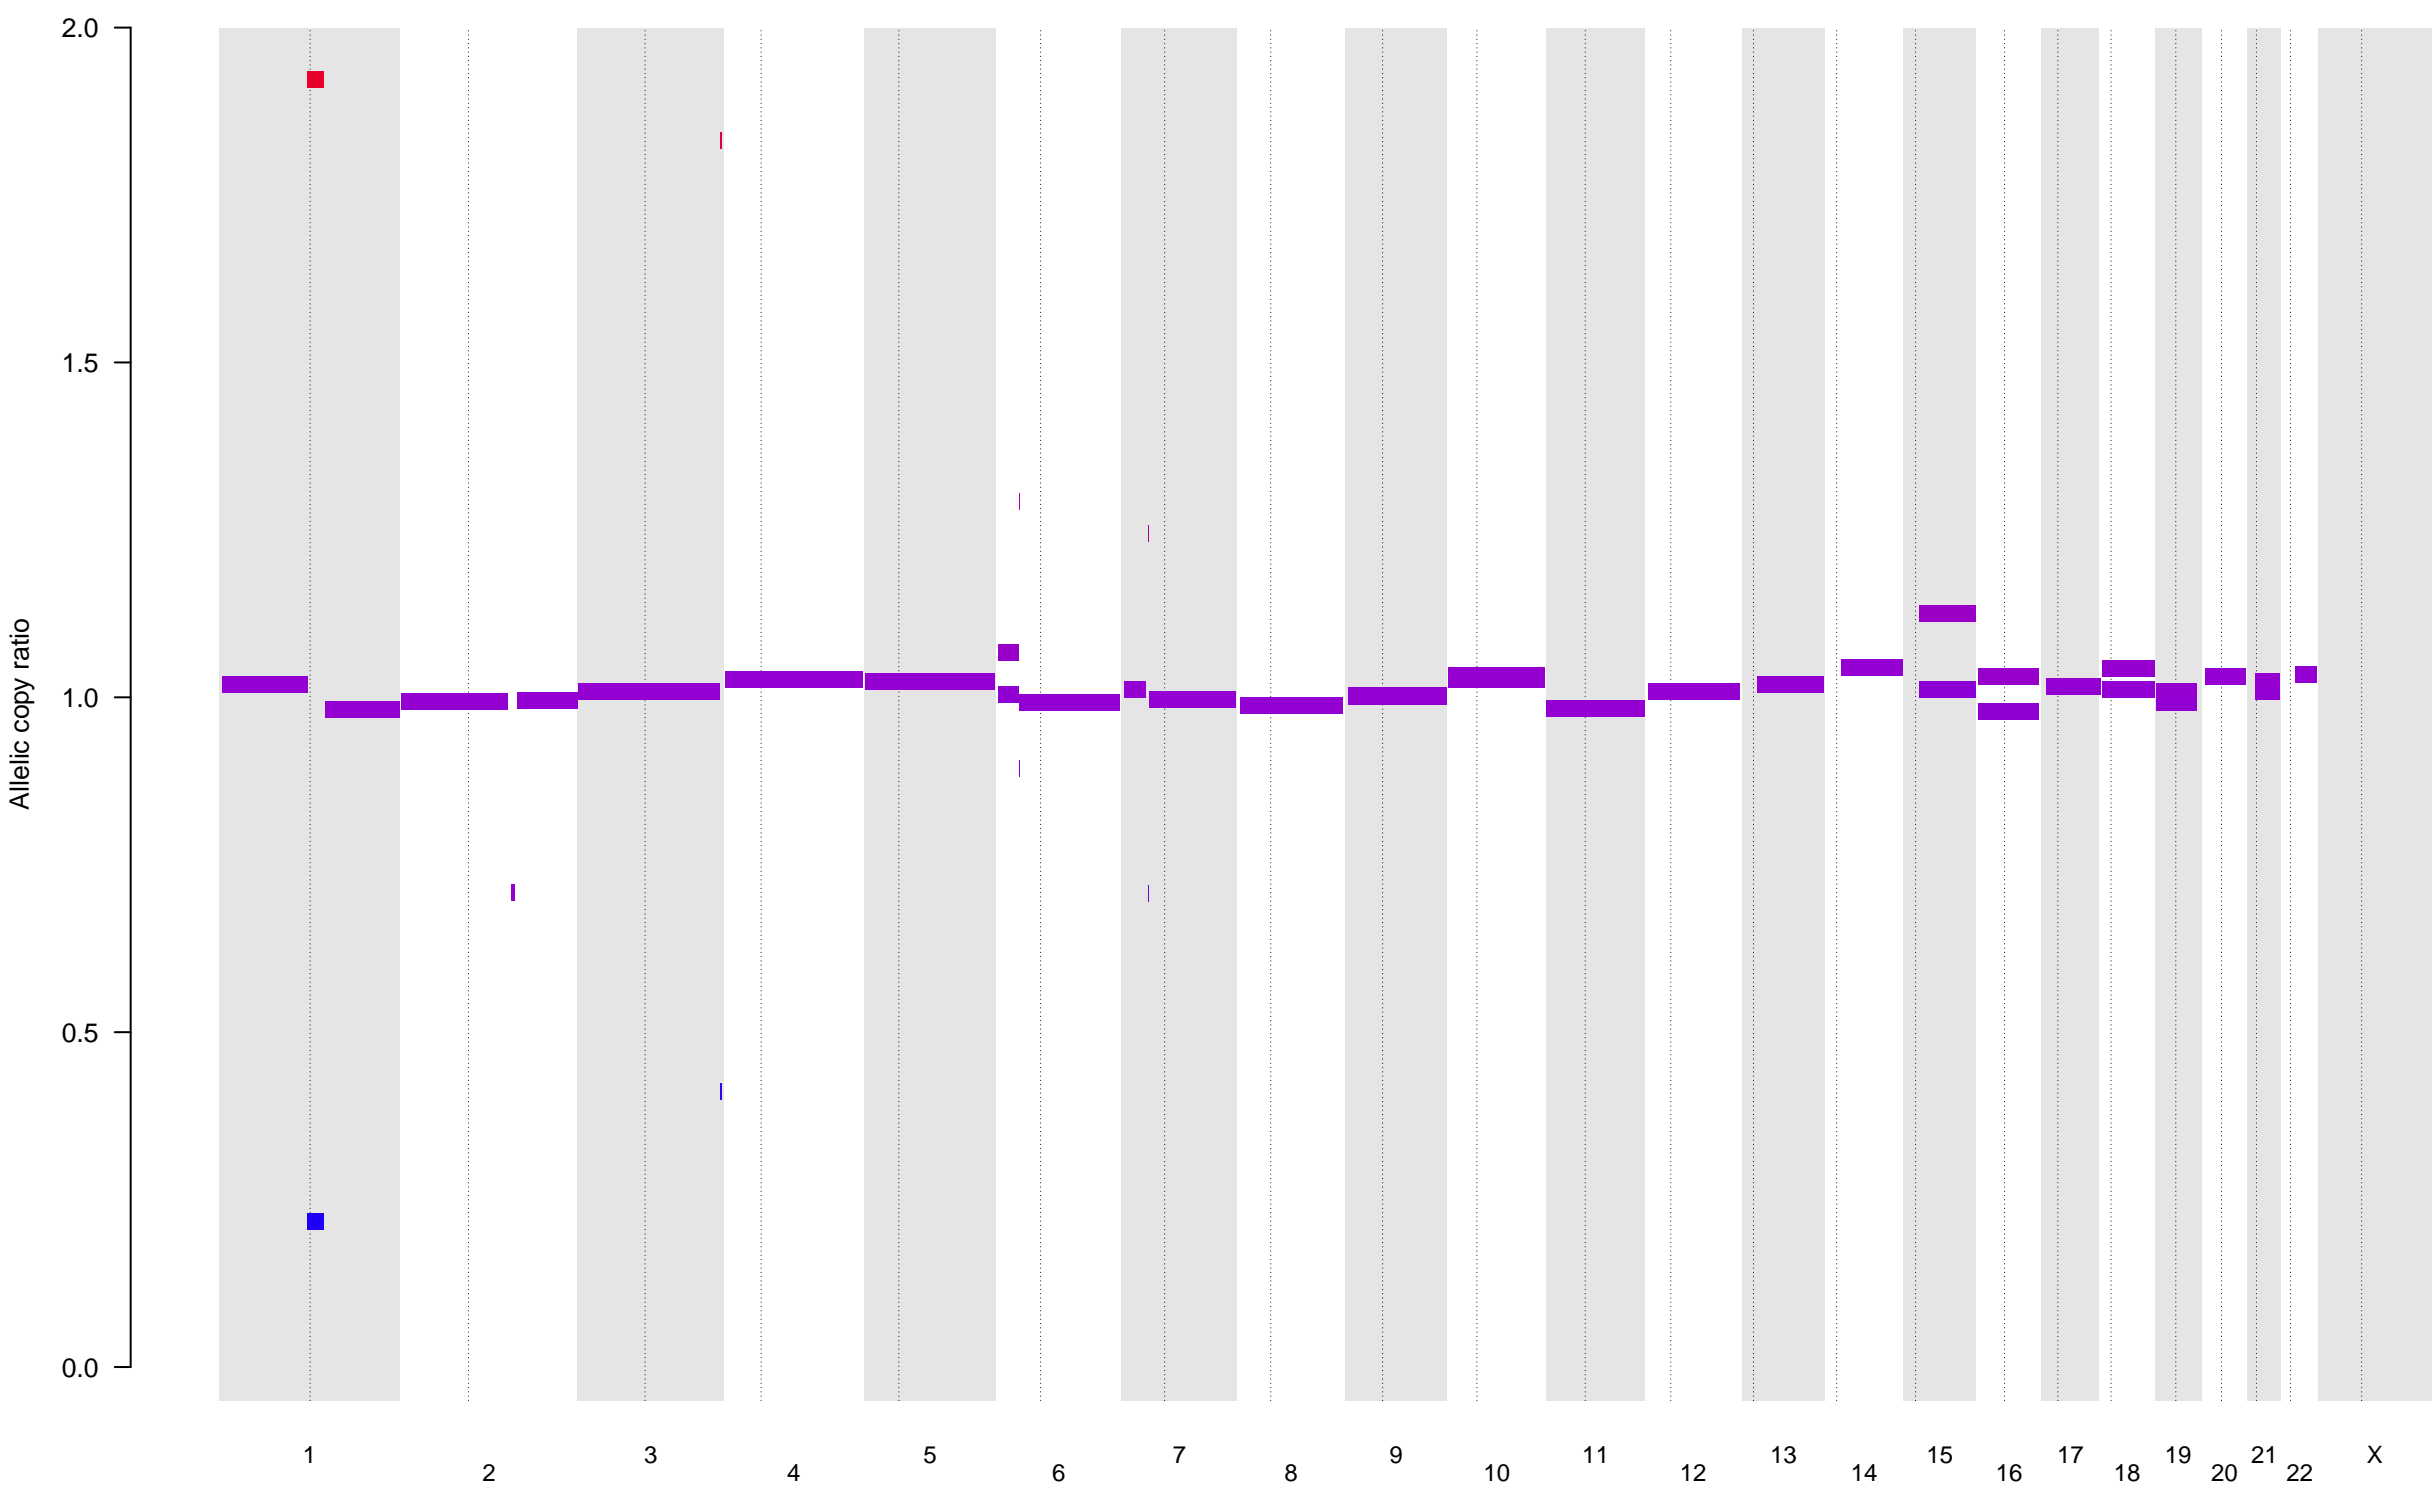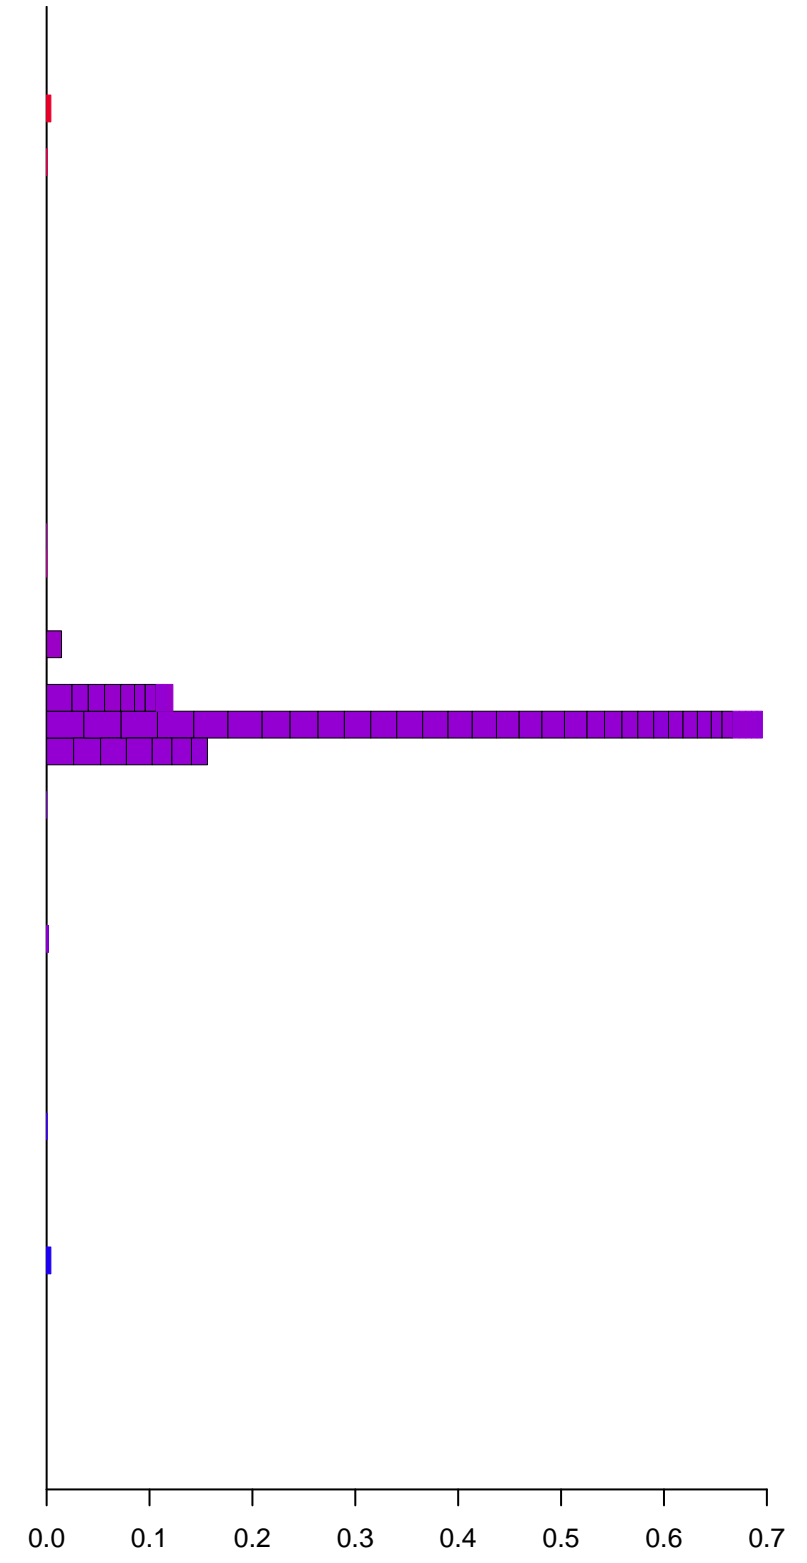

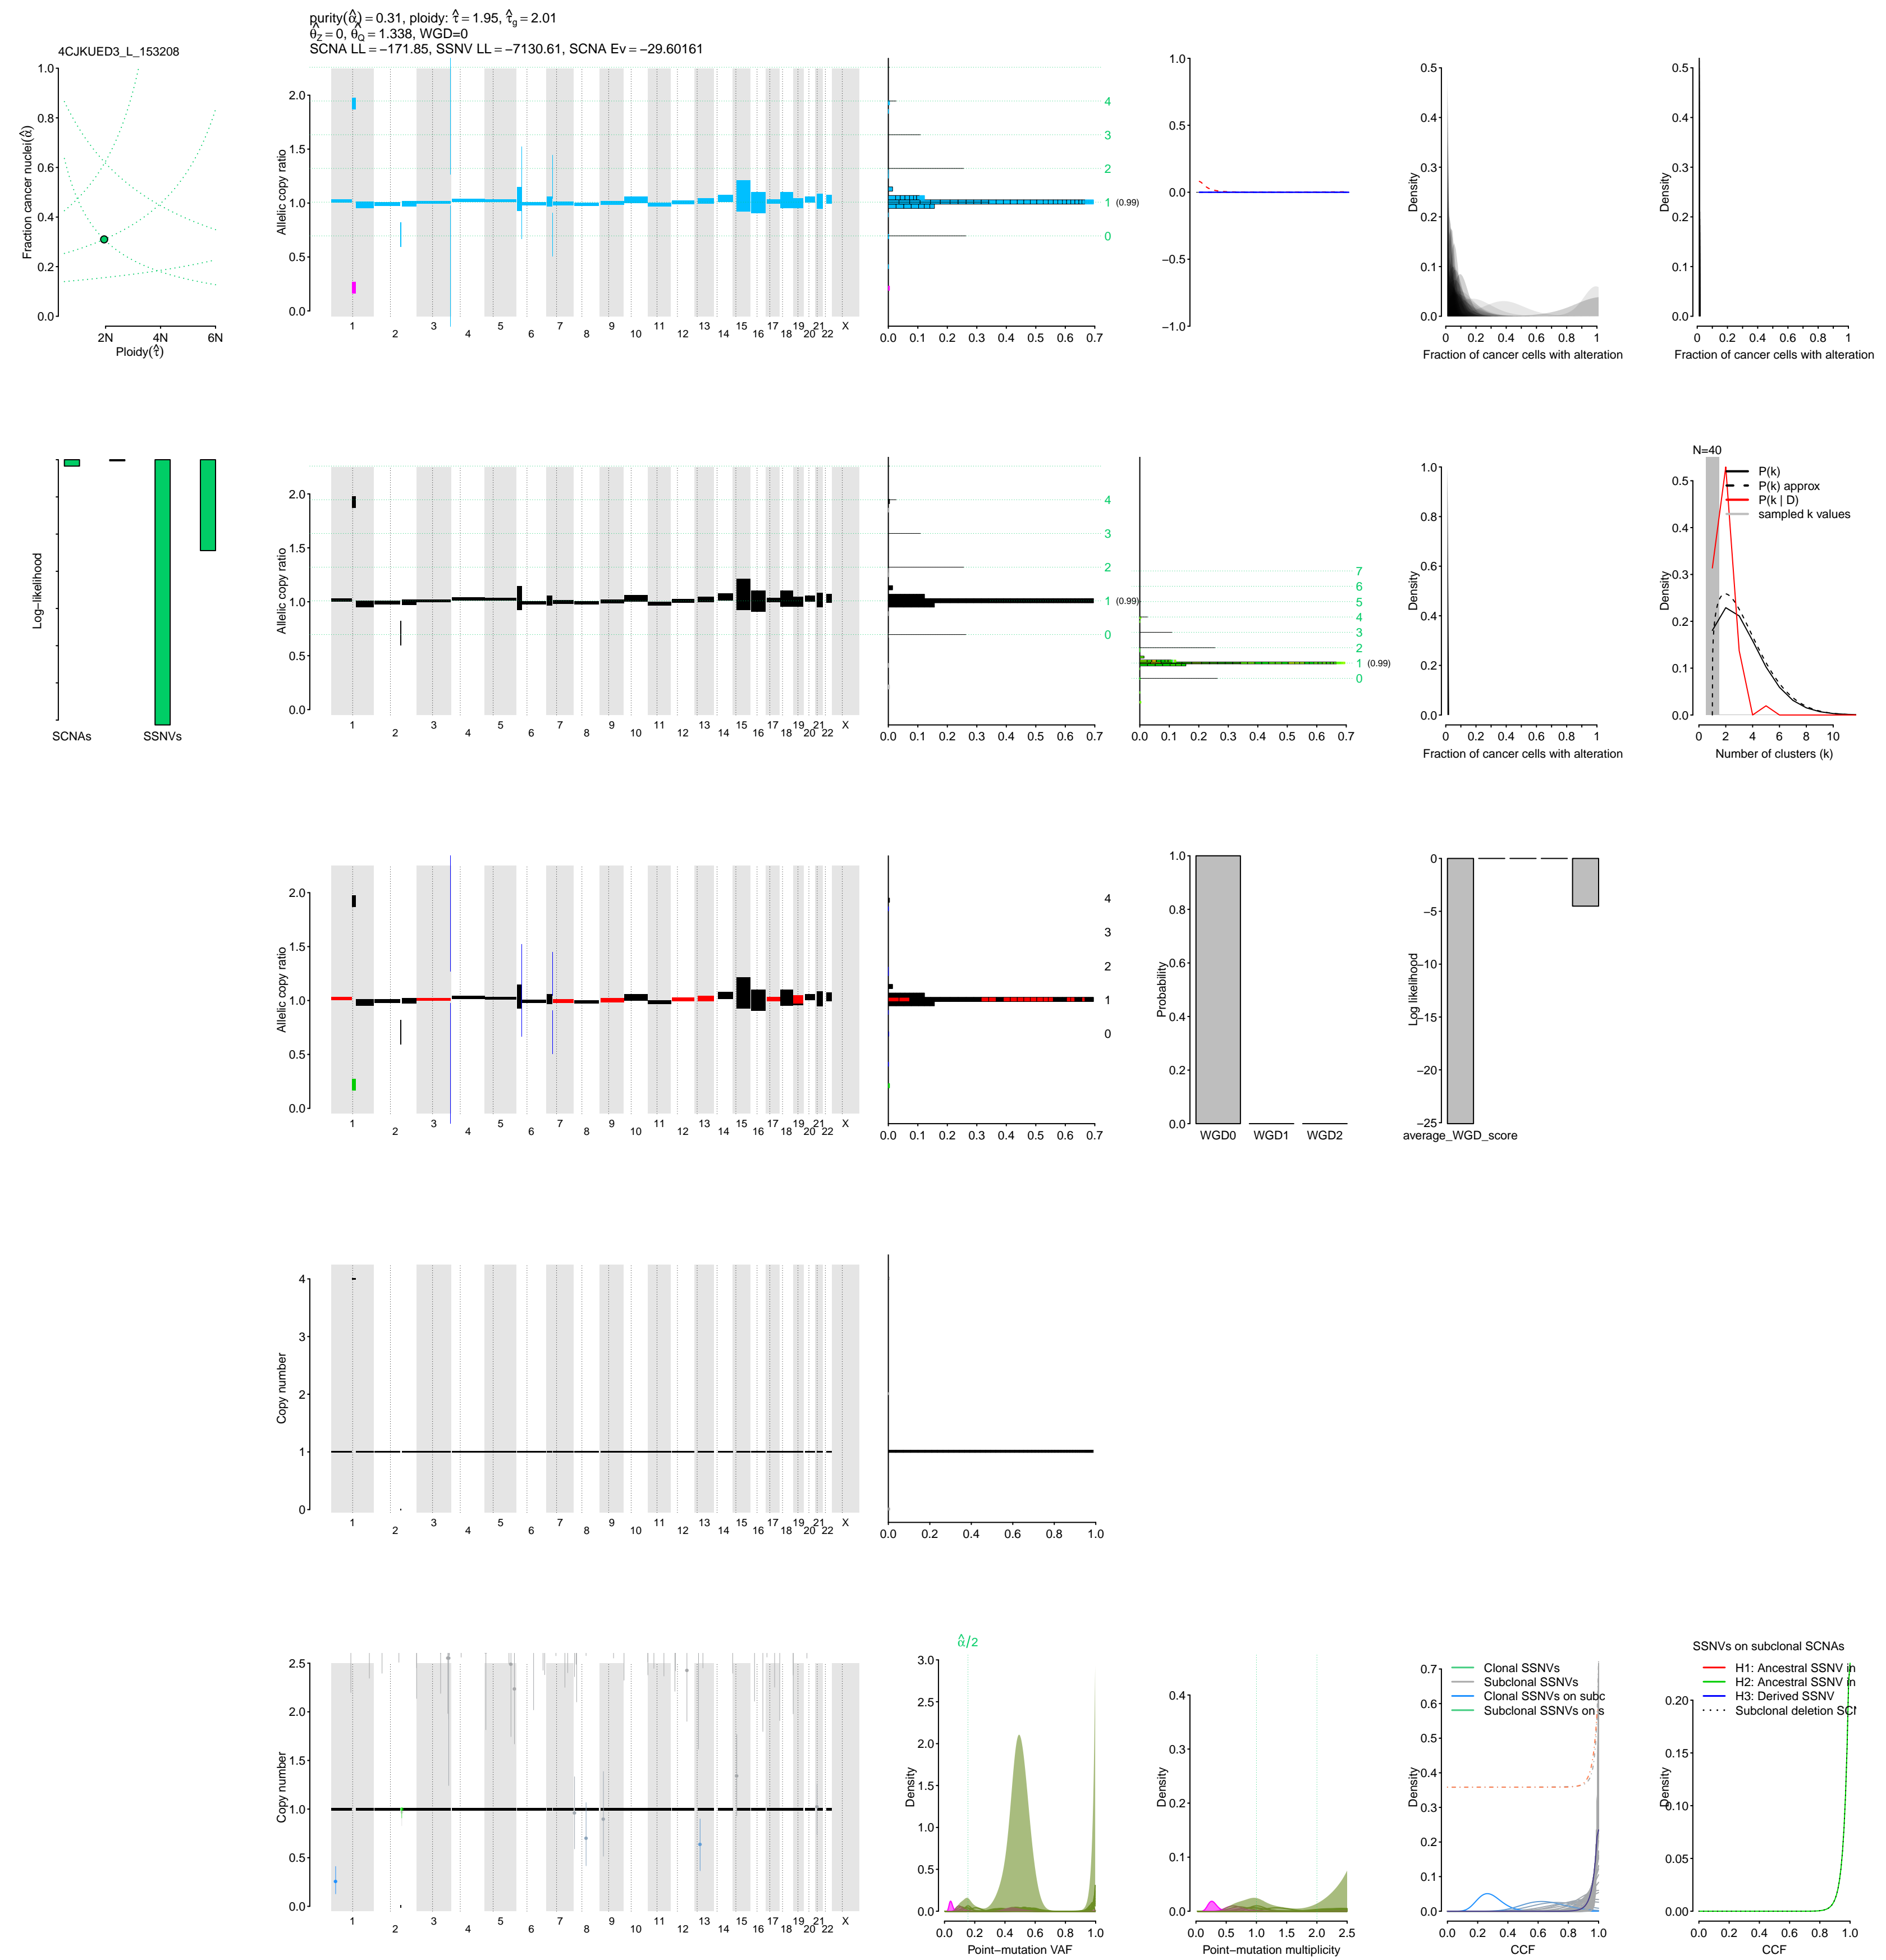

Sample 43

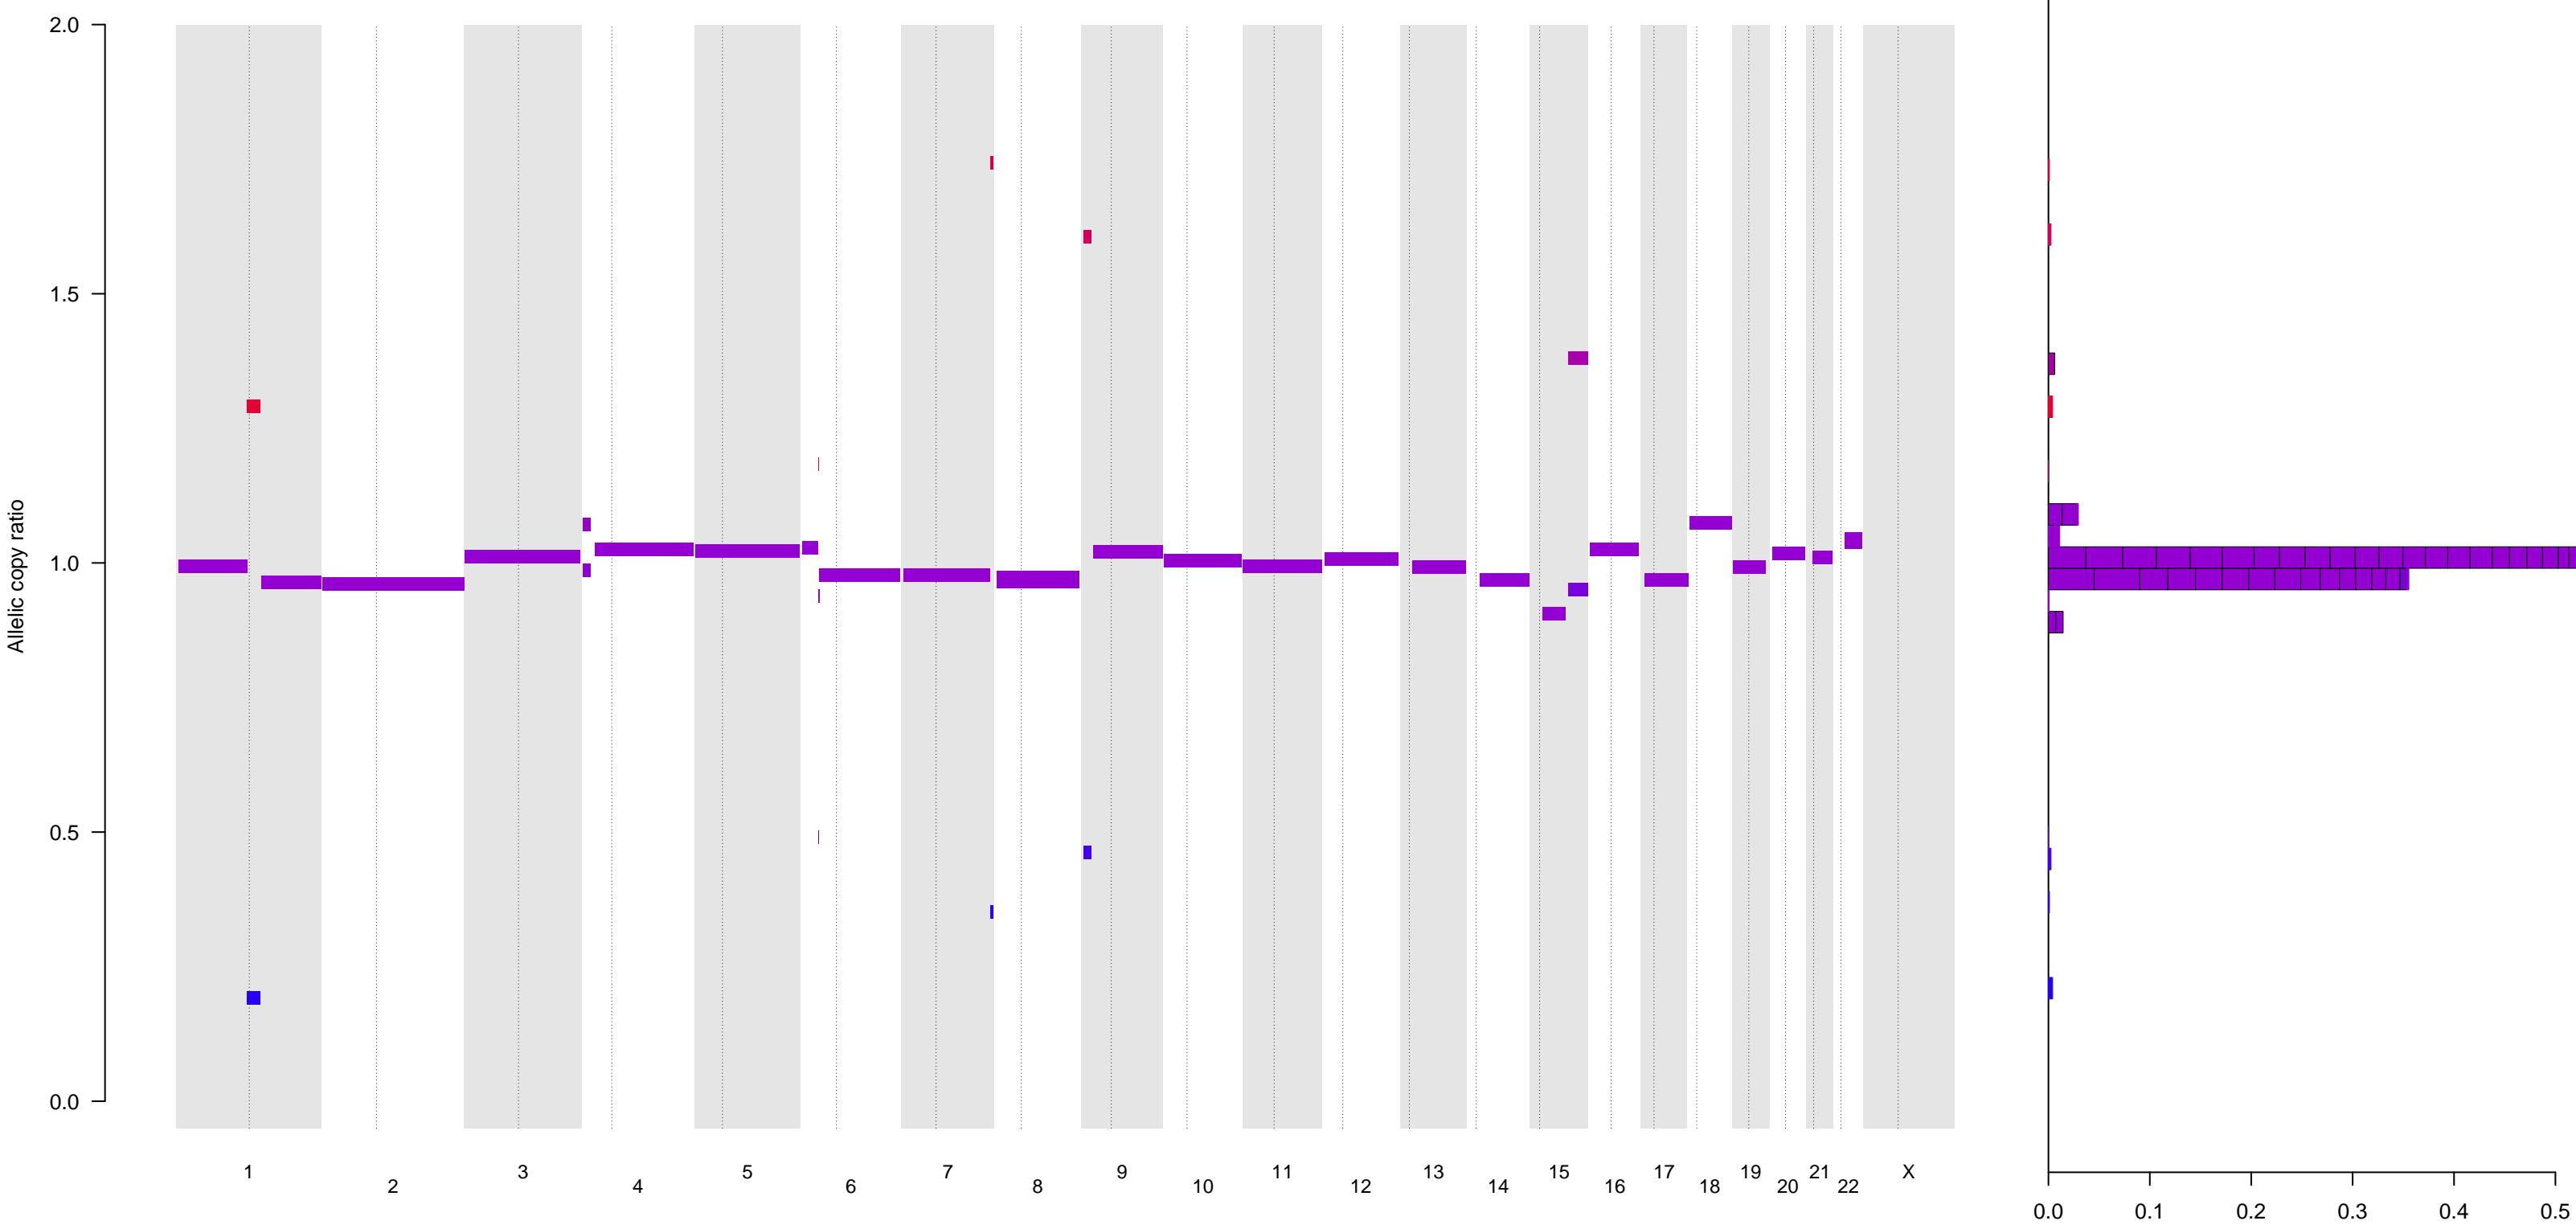

purity( $\hat{\alpha}$ ) = 0.56, ploidy:  $\hat{t} = 1.99$ ,  $\hat{t}_g = 2.01$   
 $\theta_z = 0.01$ ,  $\theta_a = 1.226$ , WGD=0  
 SCNA LL = -170.3, SSNV LL = -6090.01, SCNA Ev = -29.60161

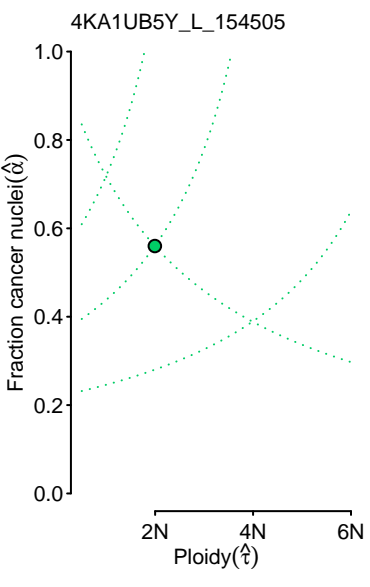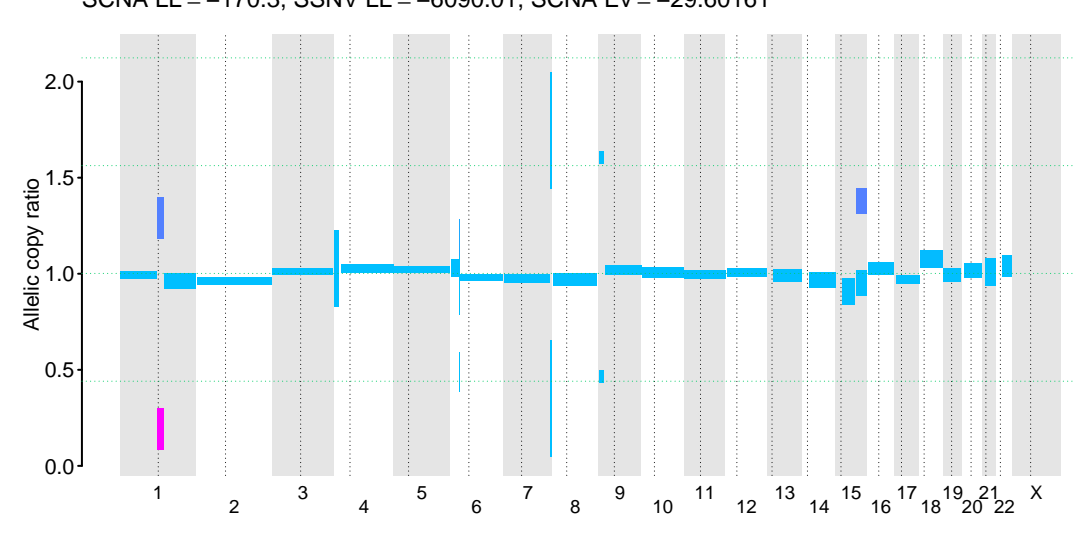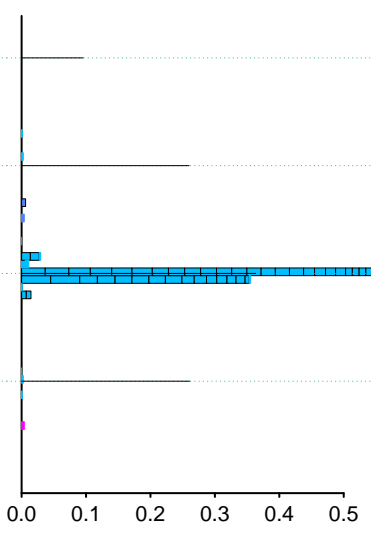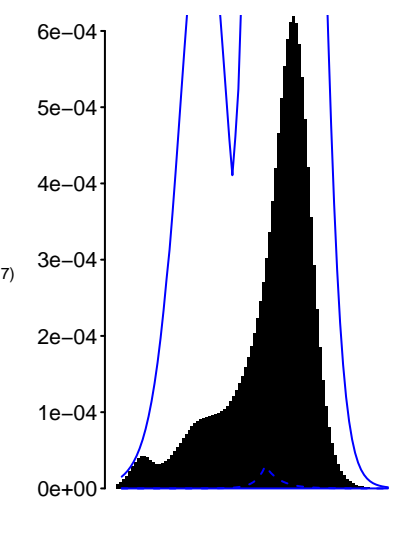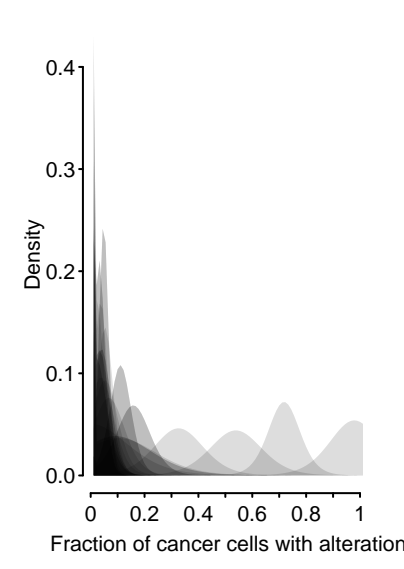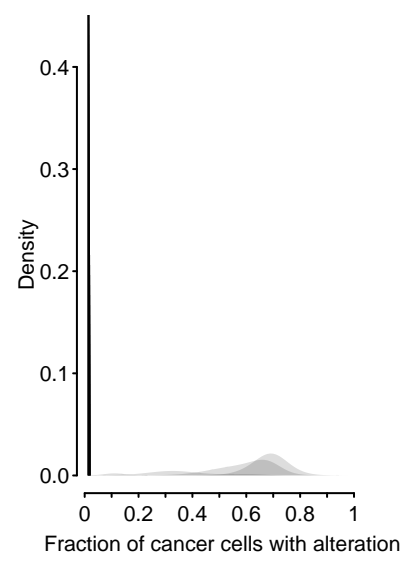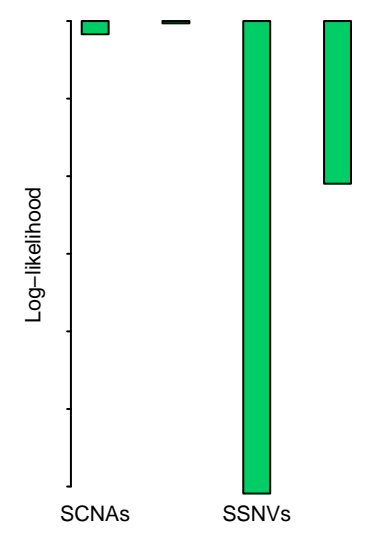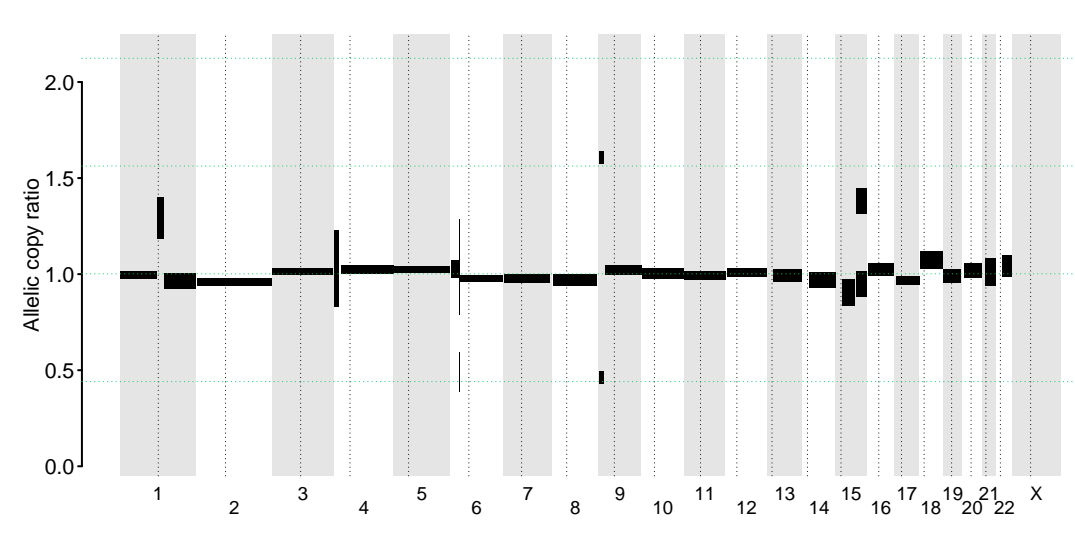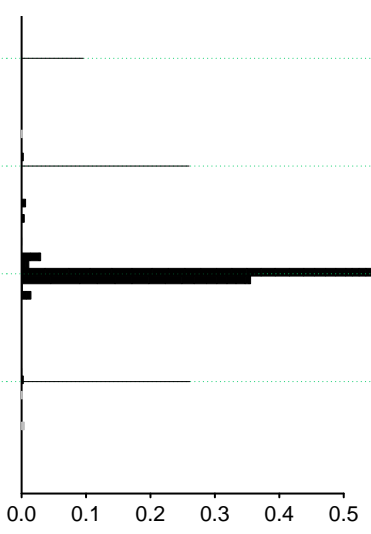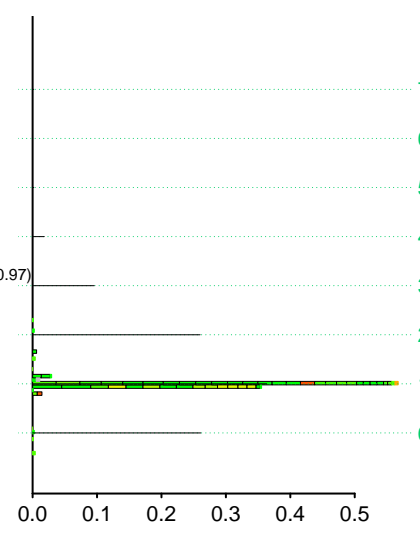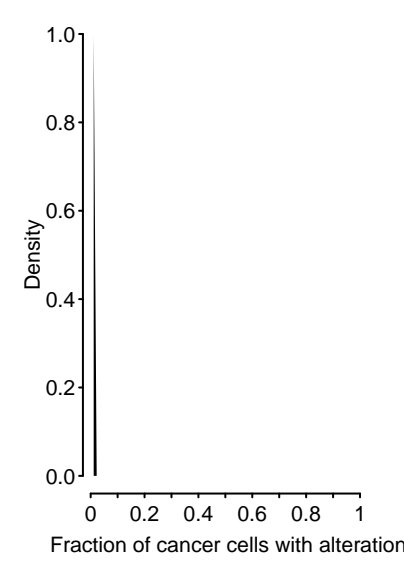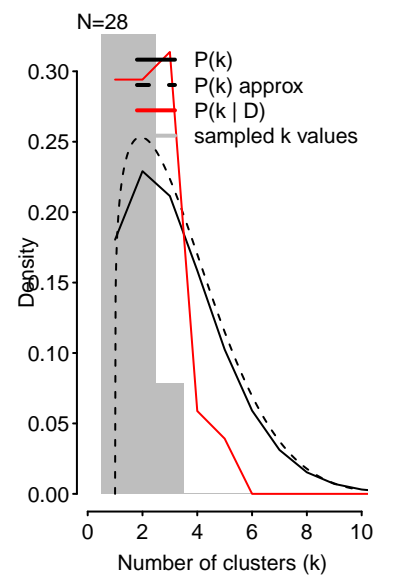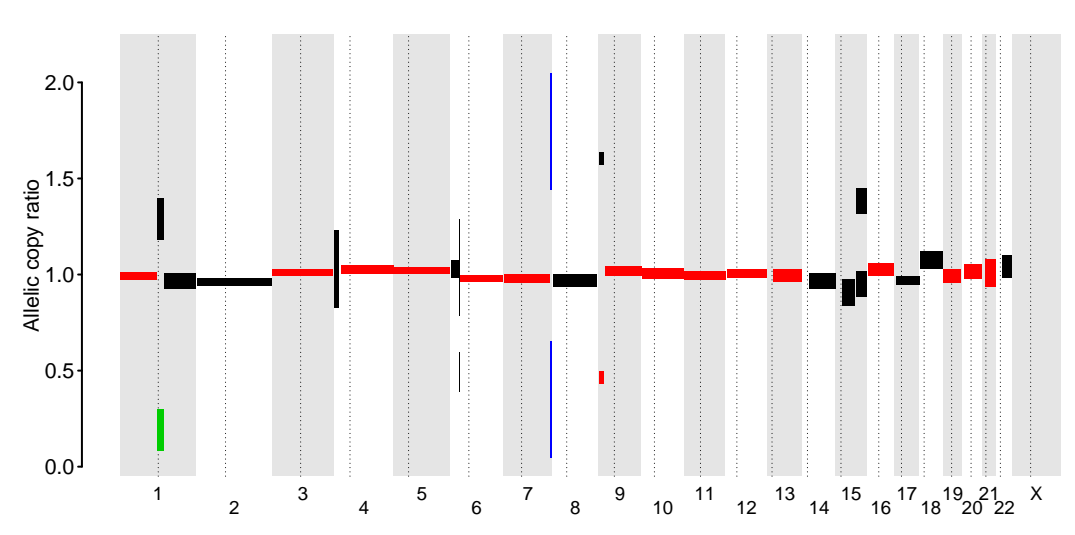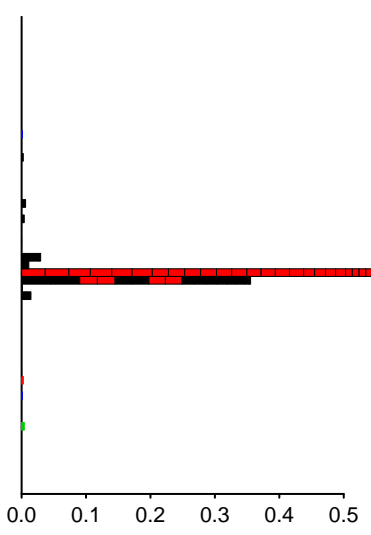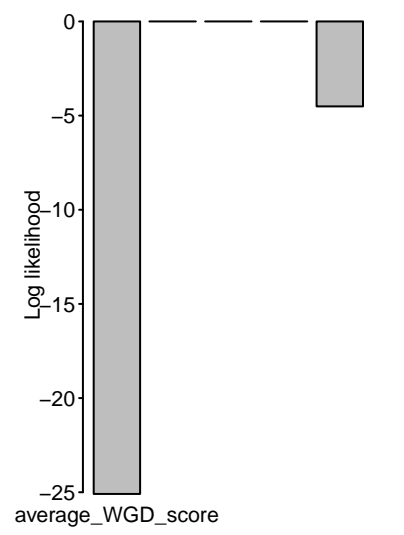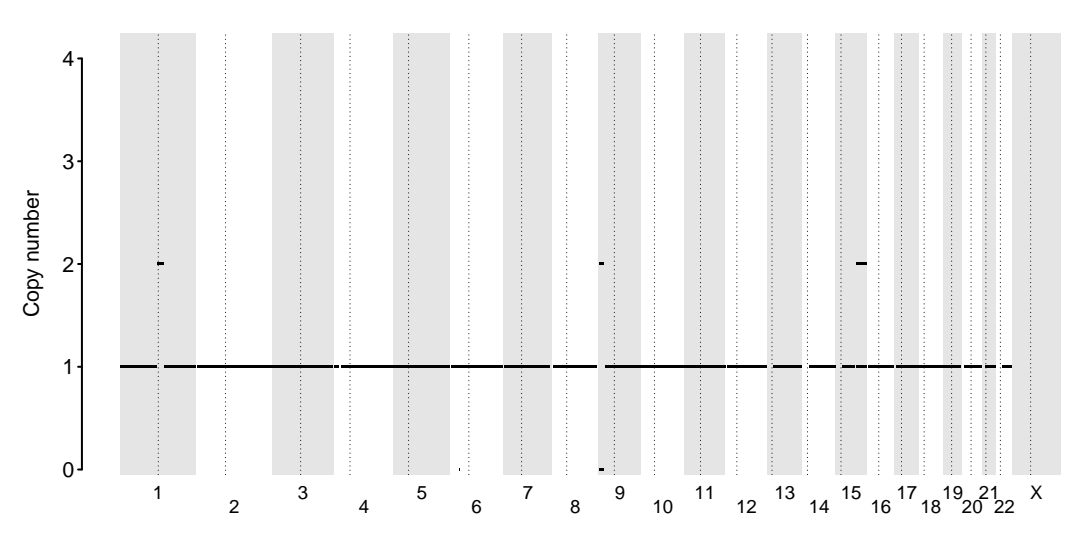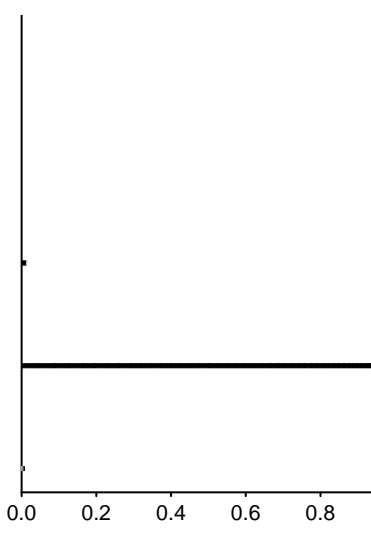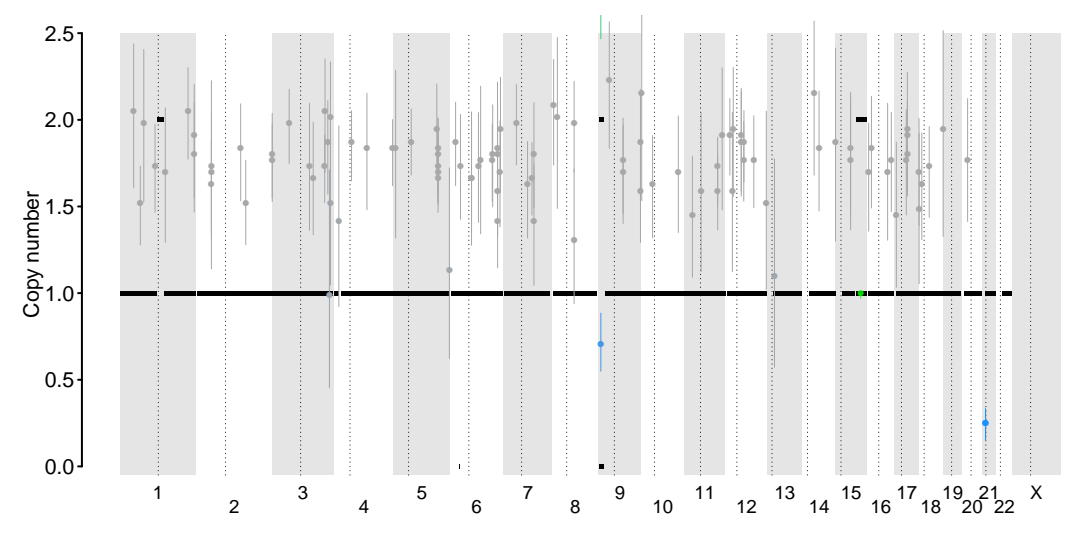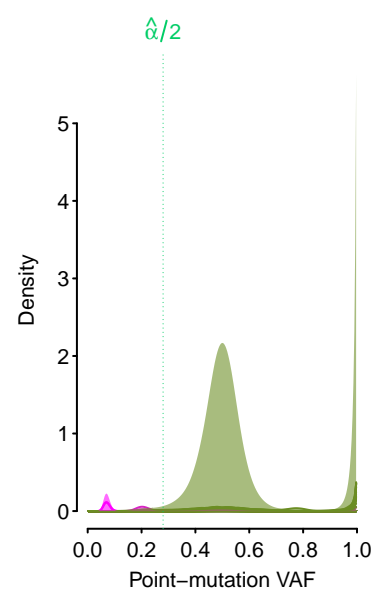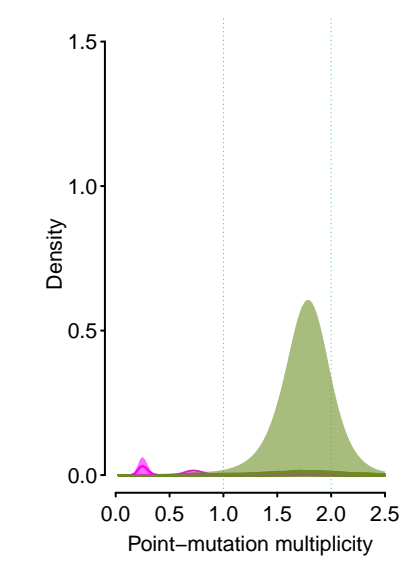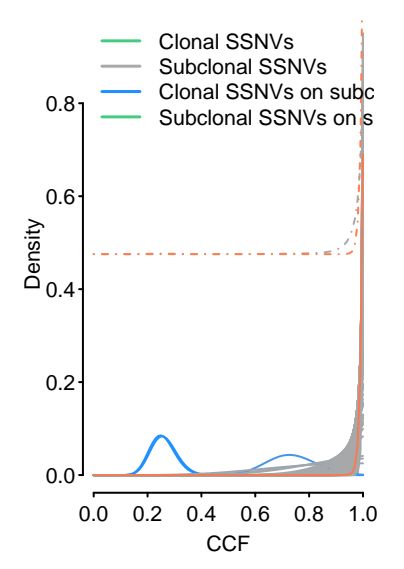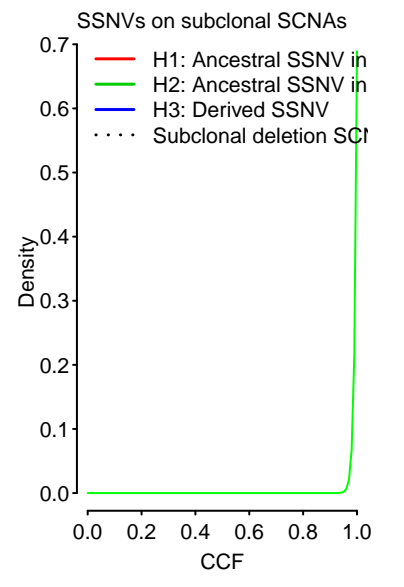

Sample 44

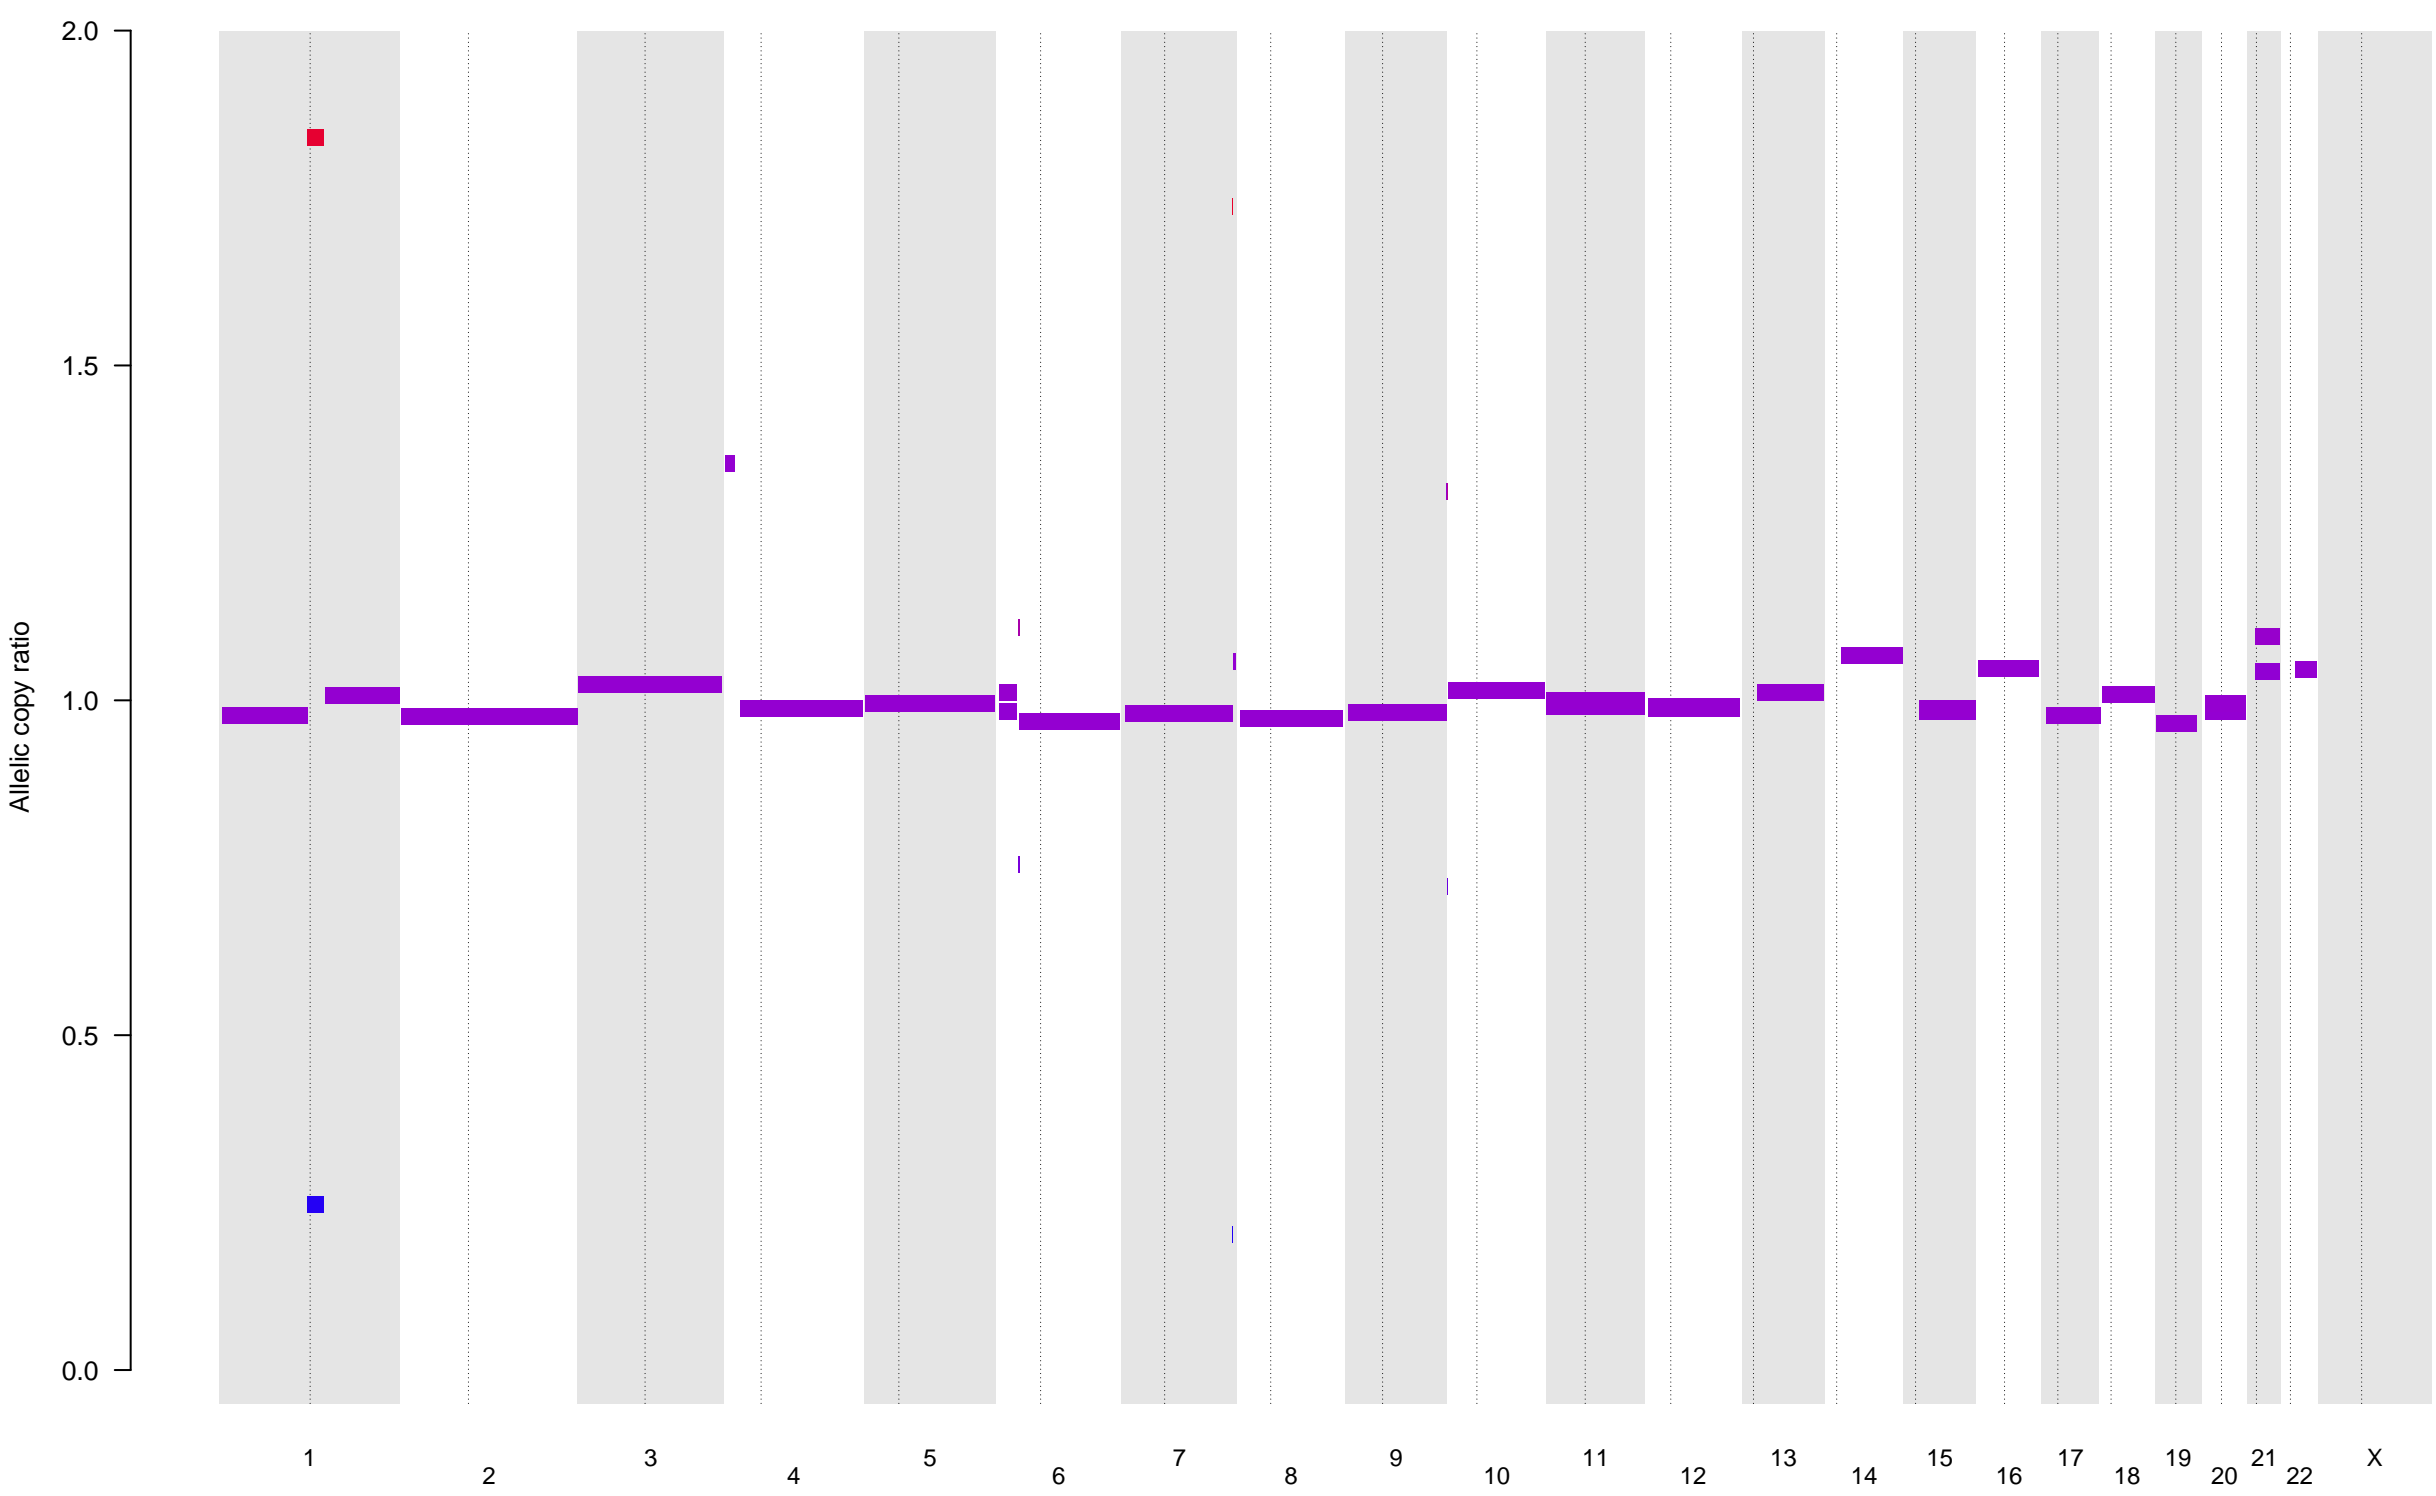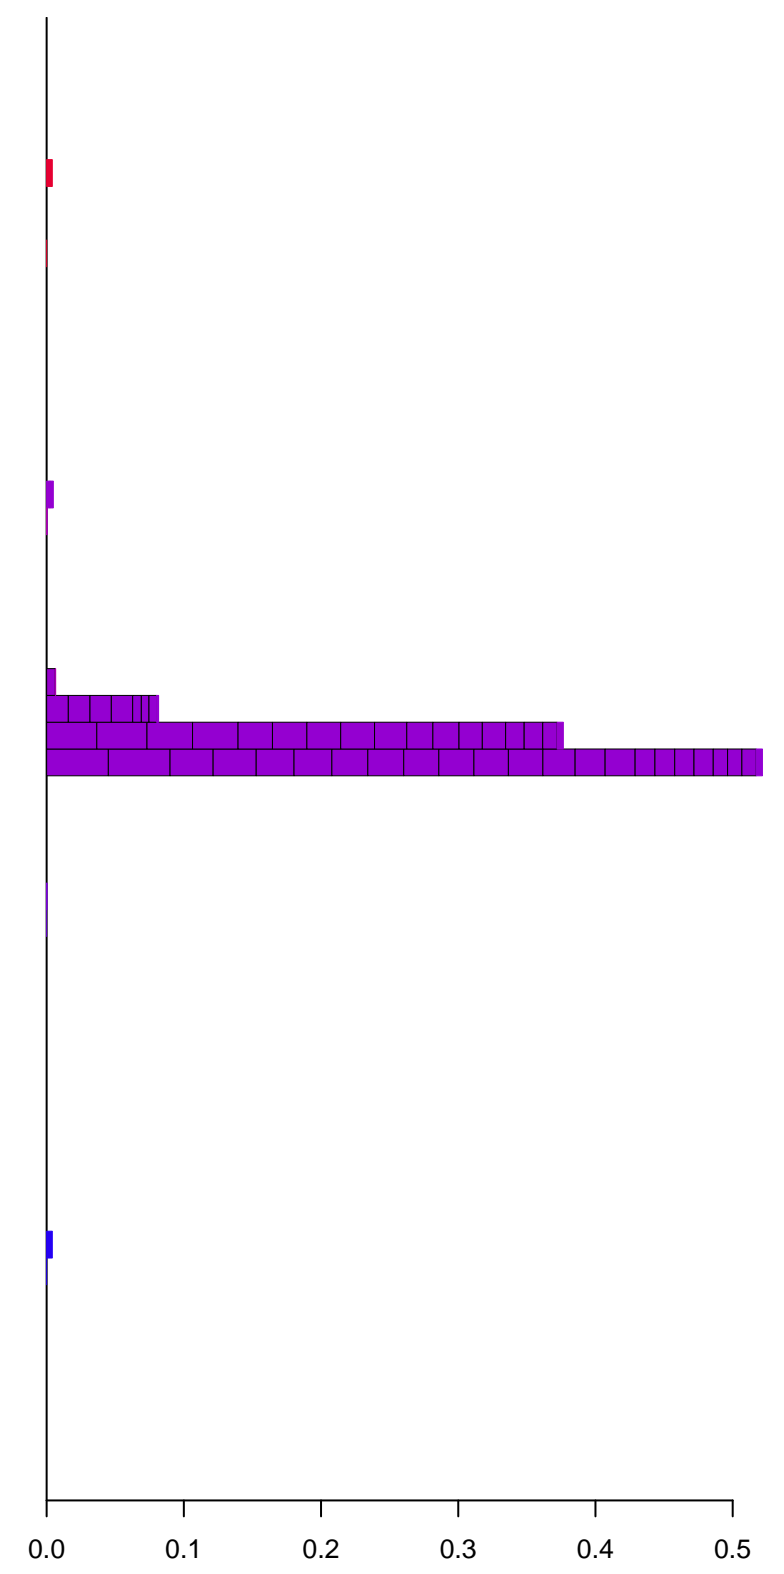

purity( $\hat{\alpha}$ ) = 0.37, ploidy:  $\hat{t} = 2.06$ ,  $\hat{t}_g = 2.02$   
 $\theta_z = 0.01$ ,  $\theta_Q = 1.318$ , WGD=0  
 SCNA LL = -195.47, SSNV LL = -4698.24, SCNA Ev = -29.60161

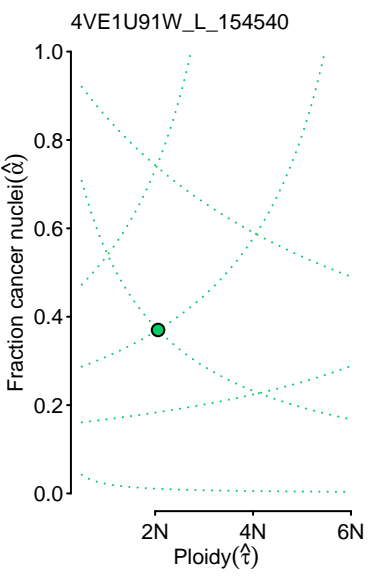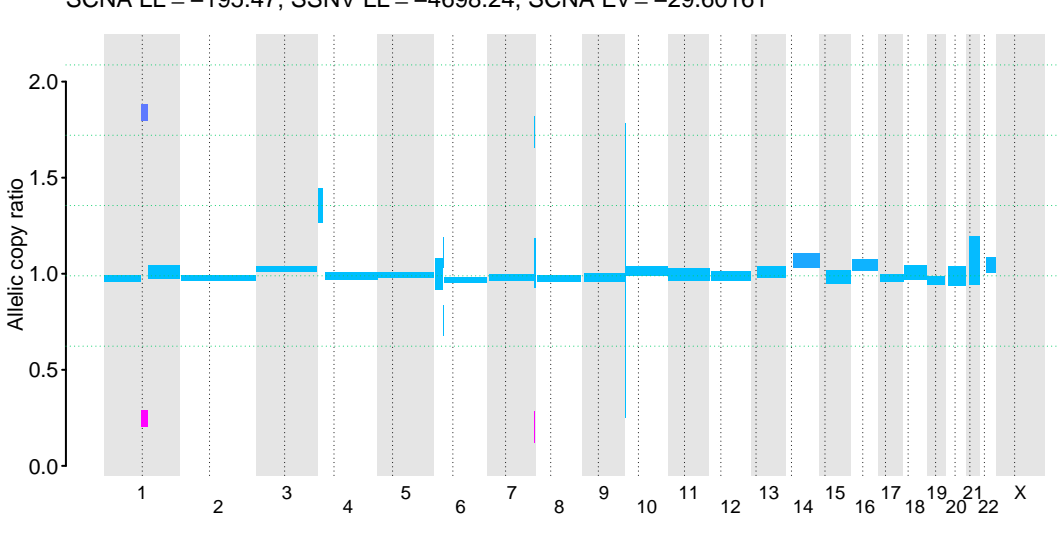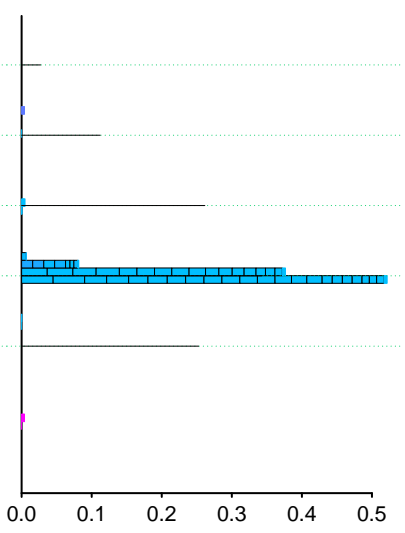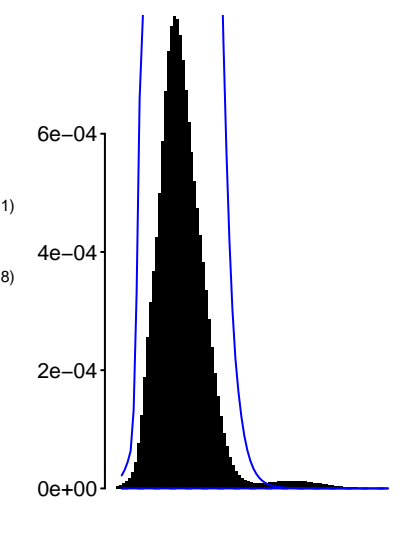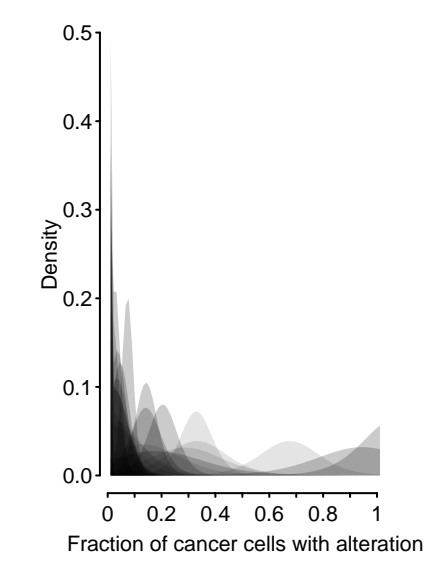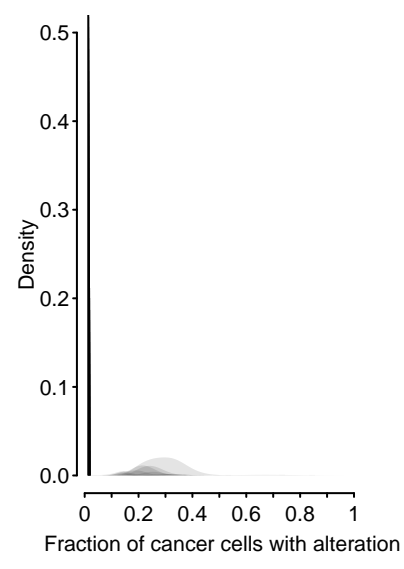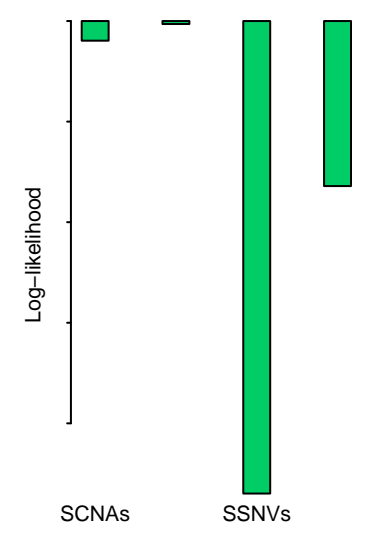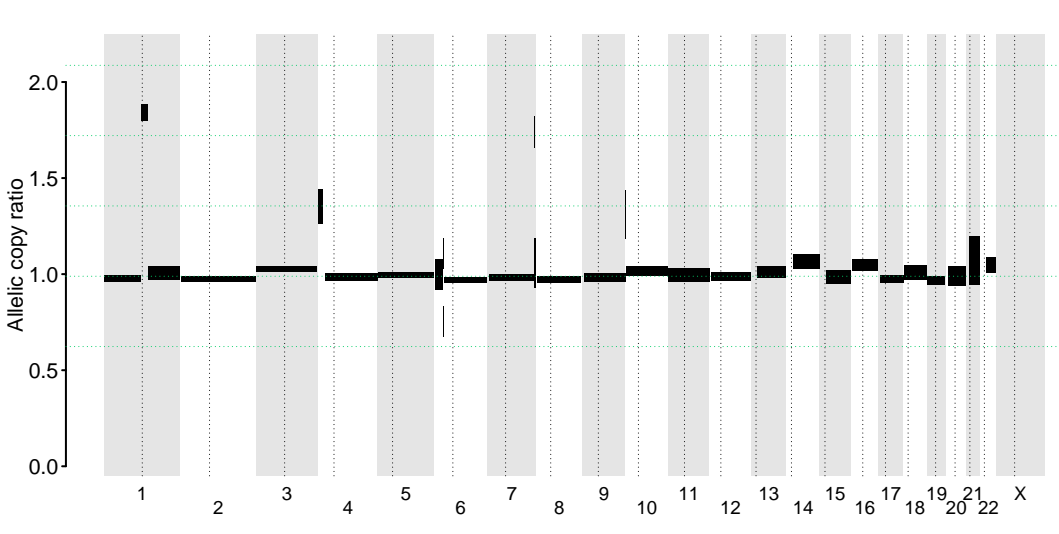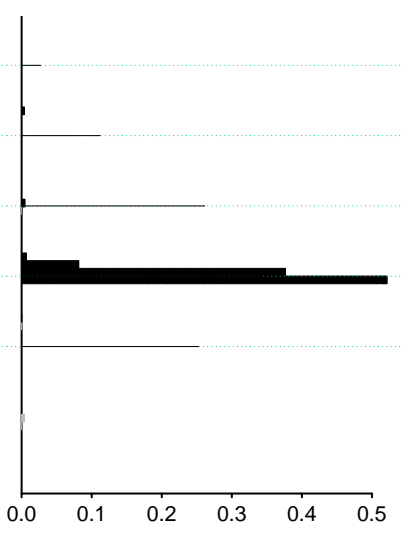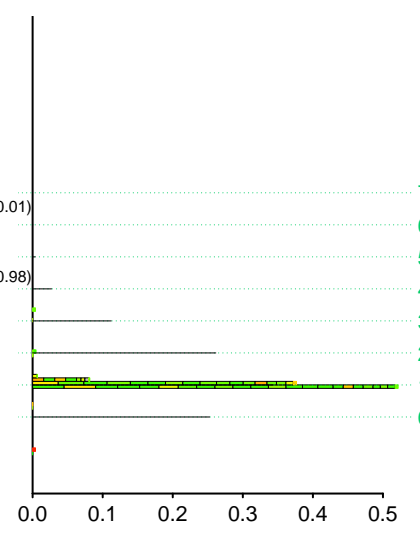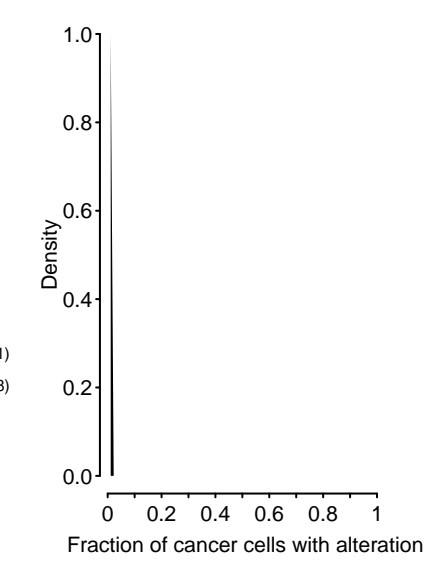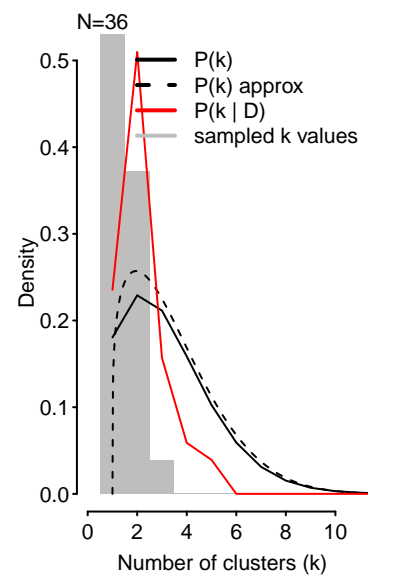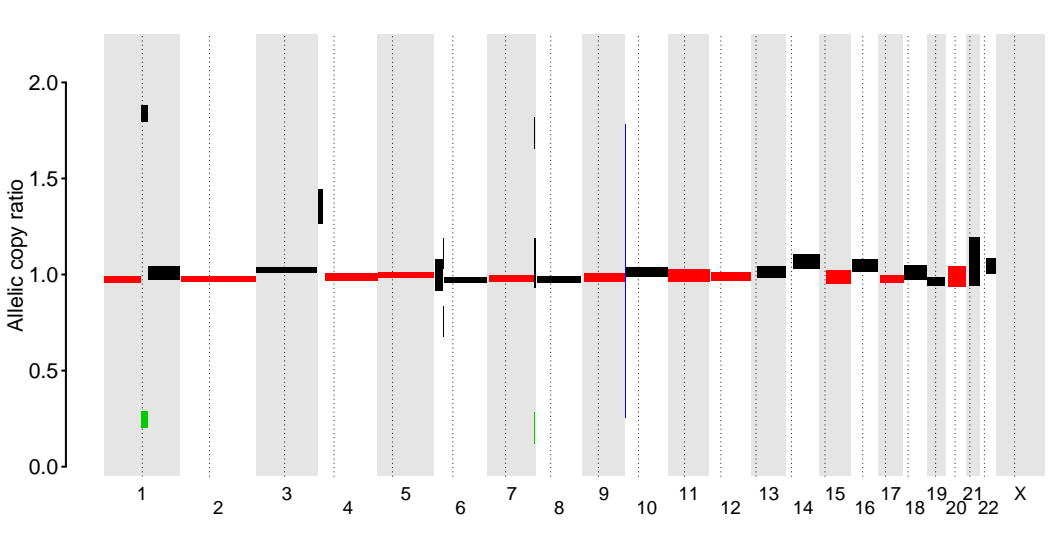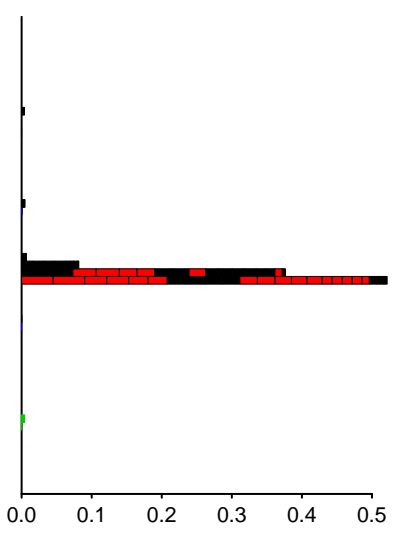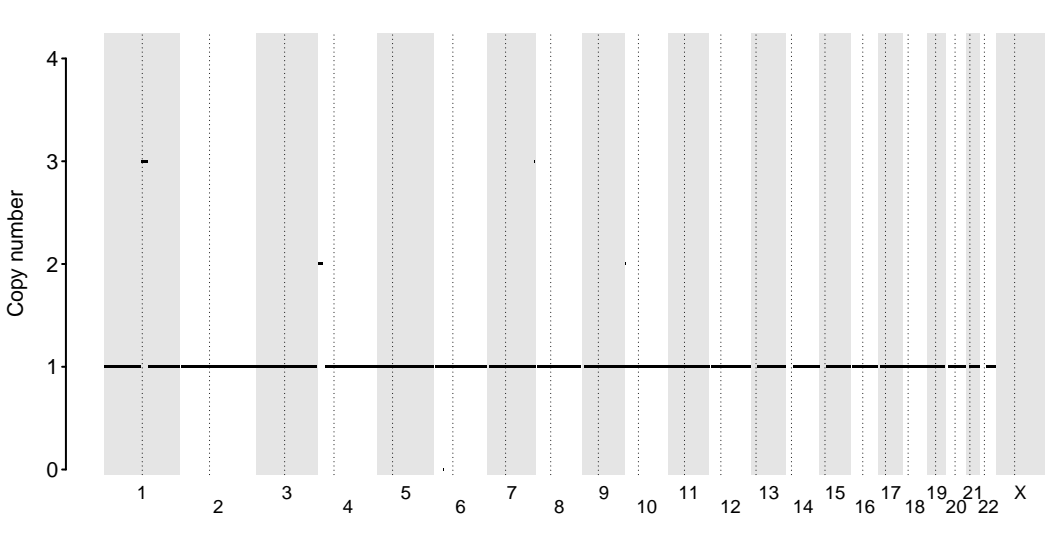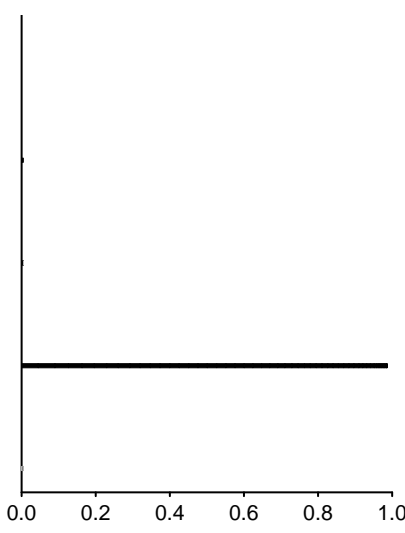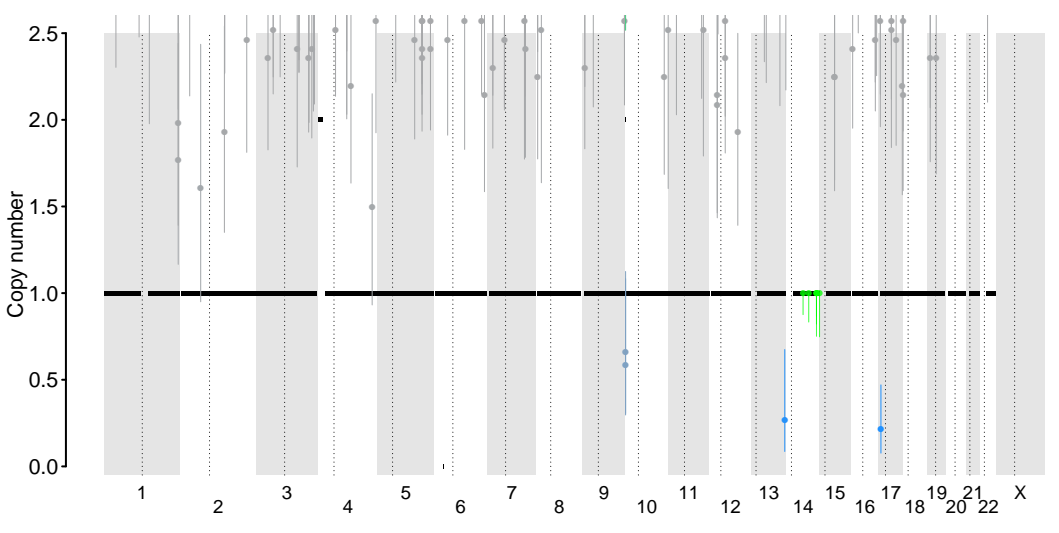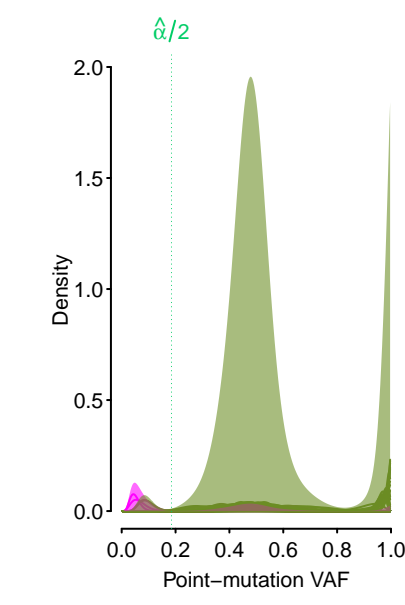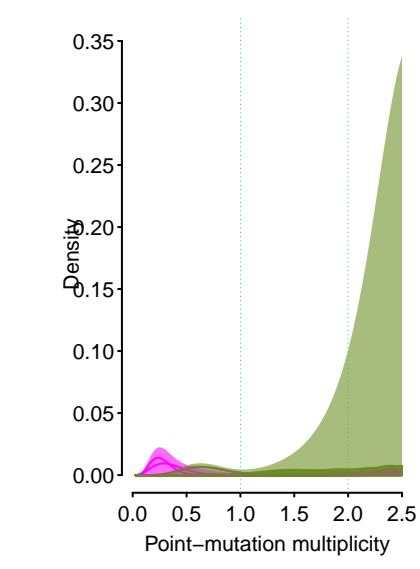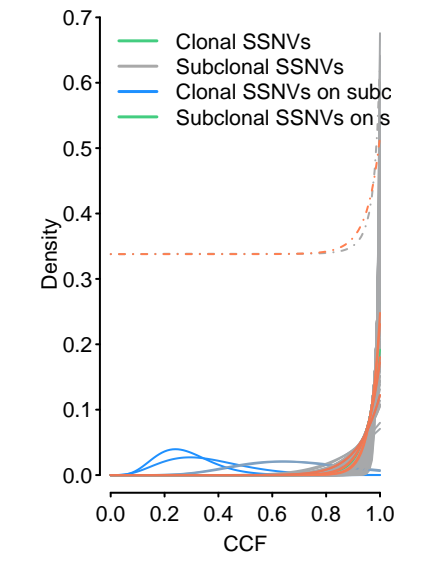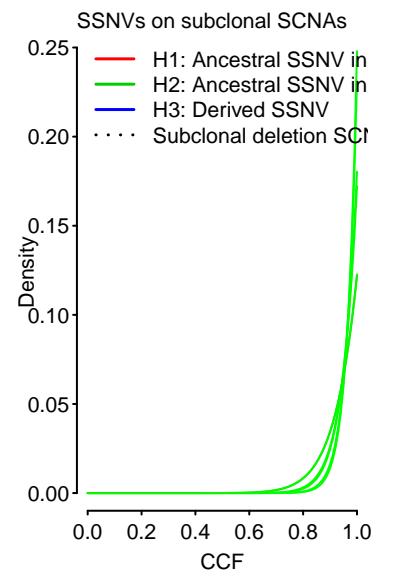

Sample 45

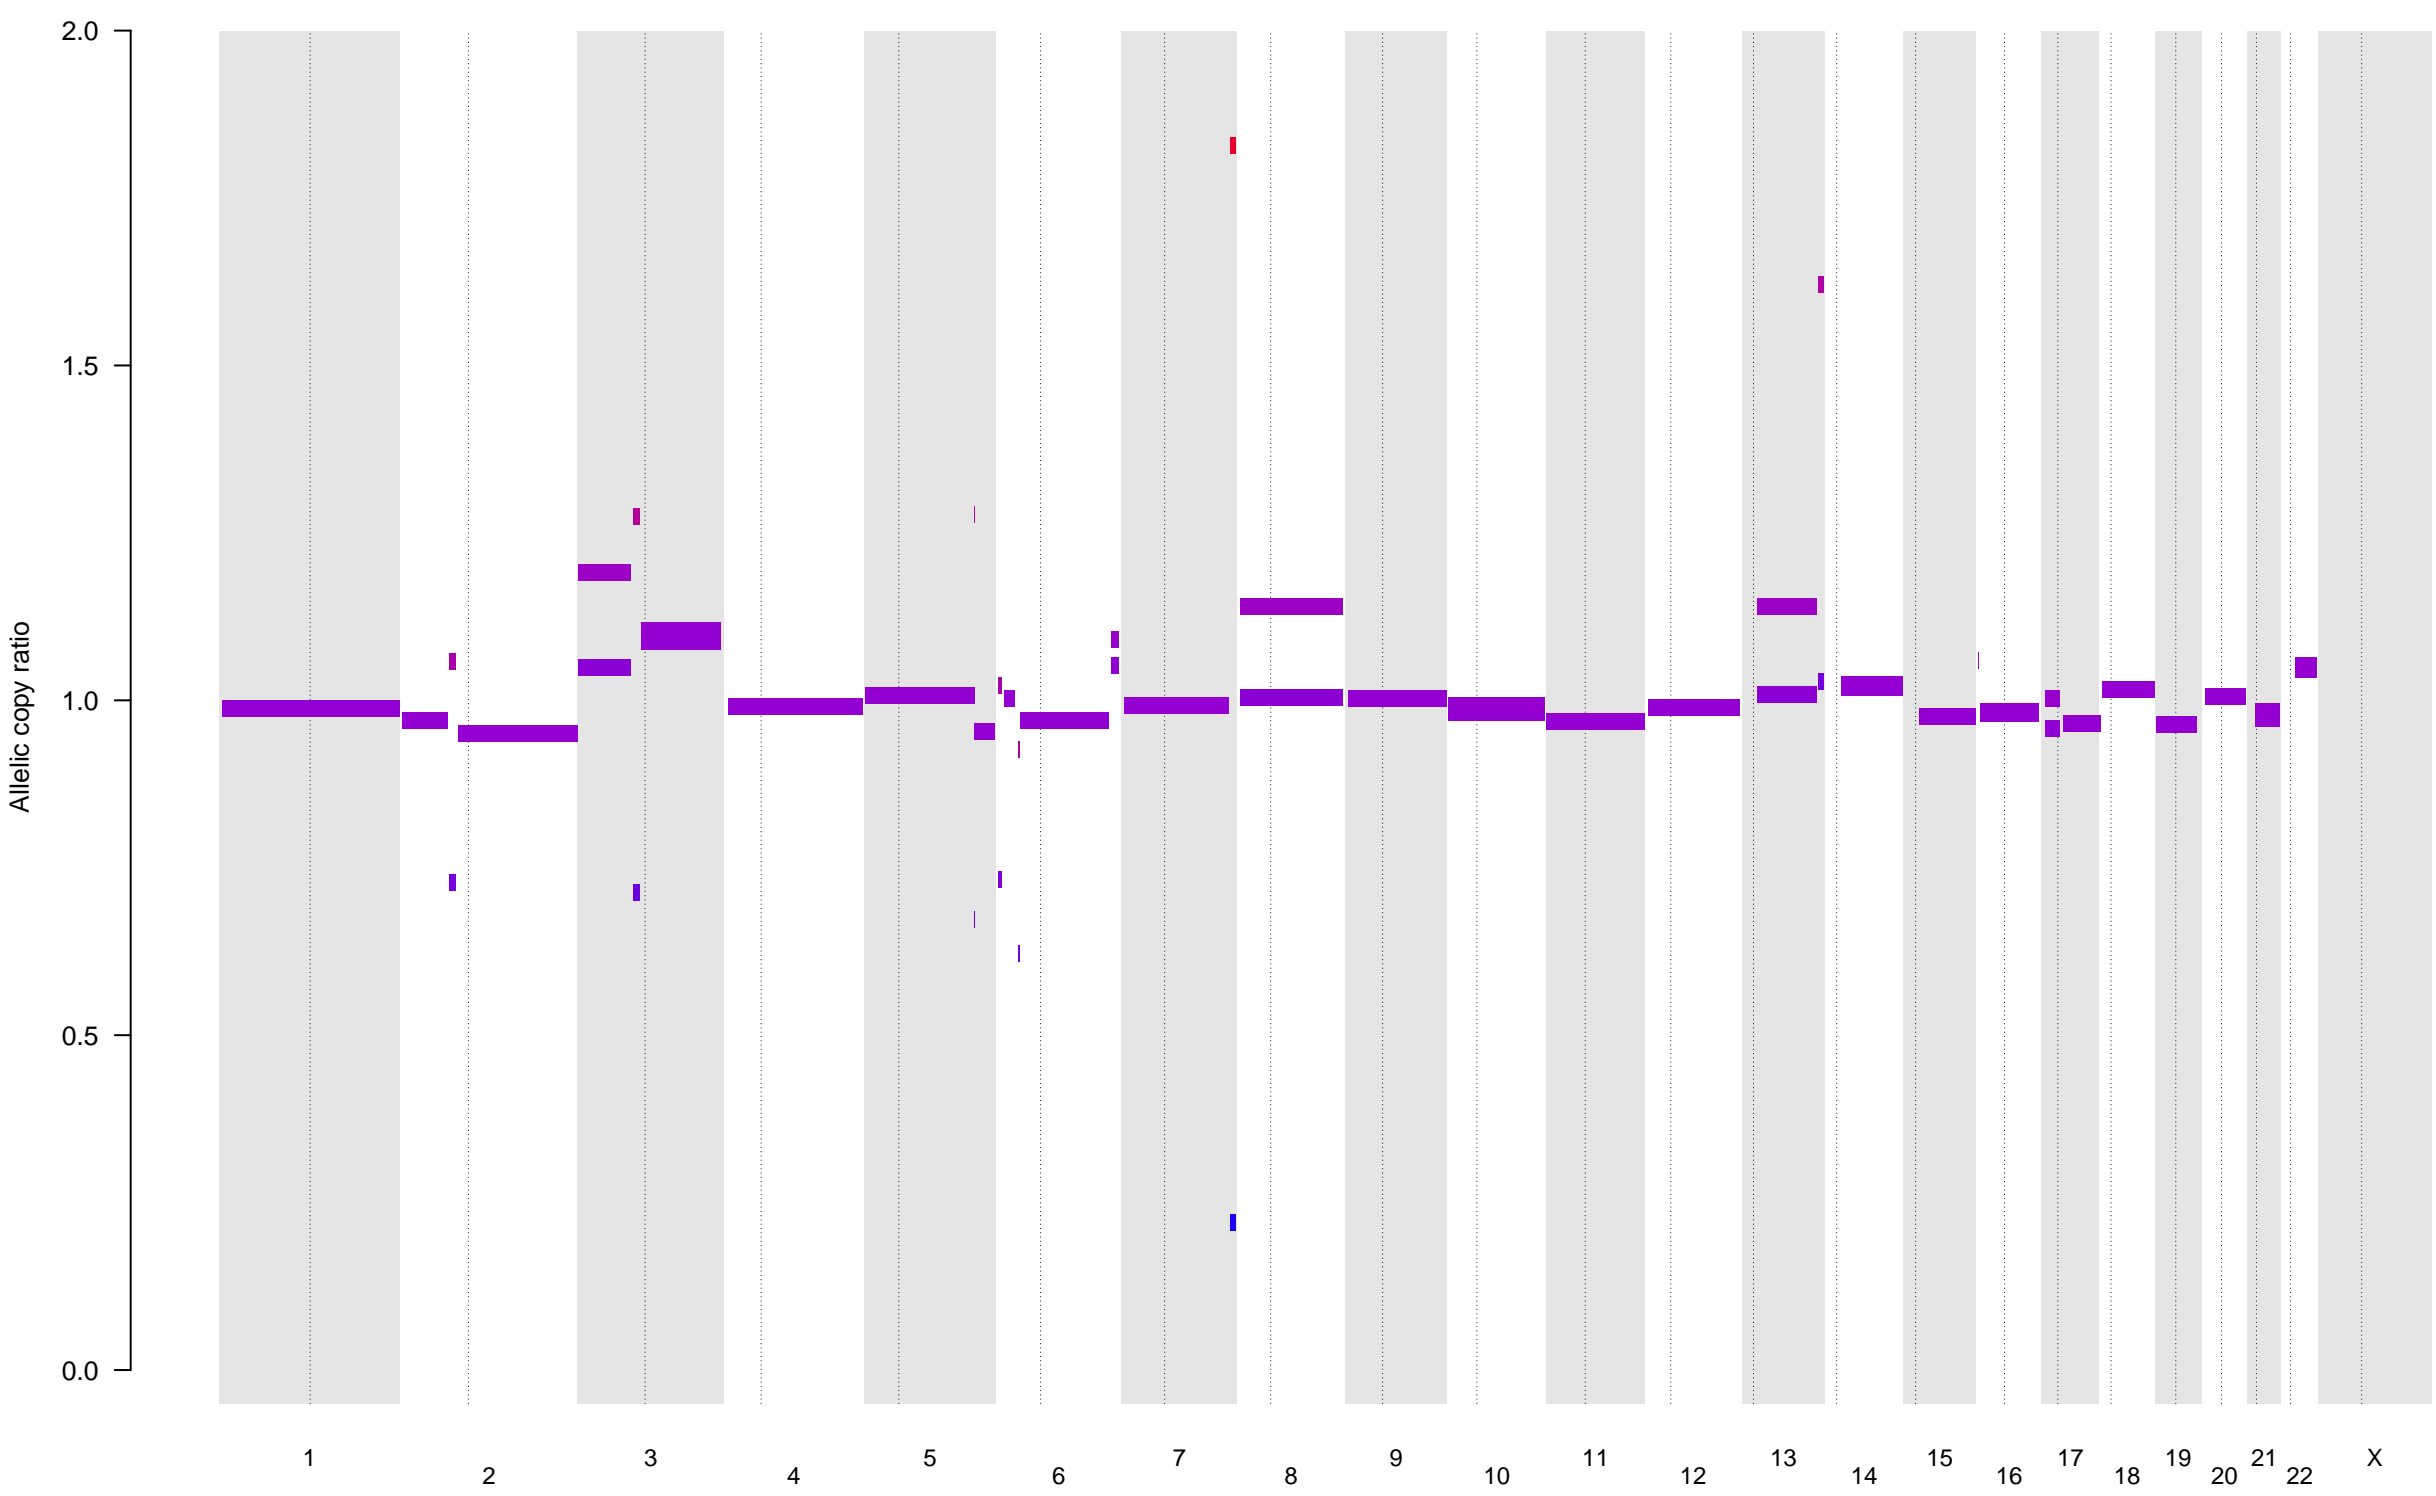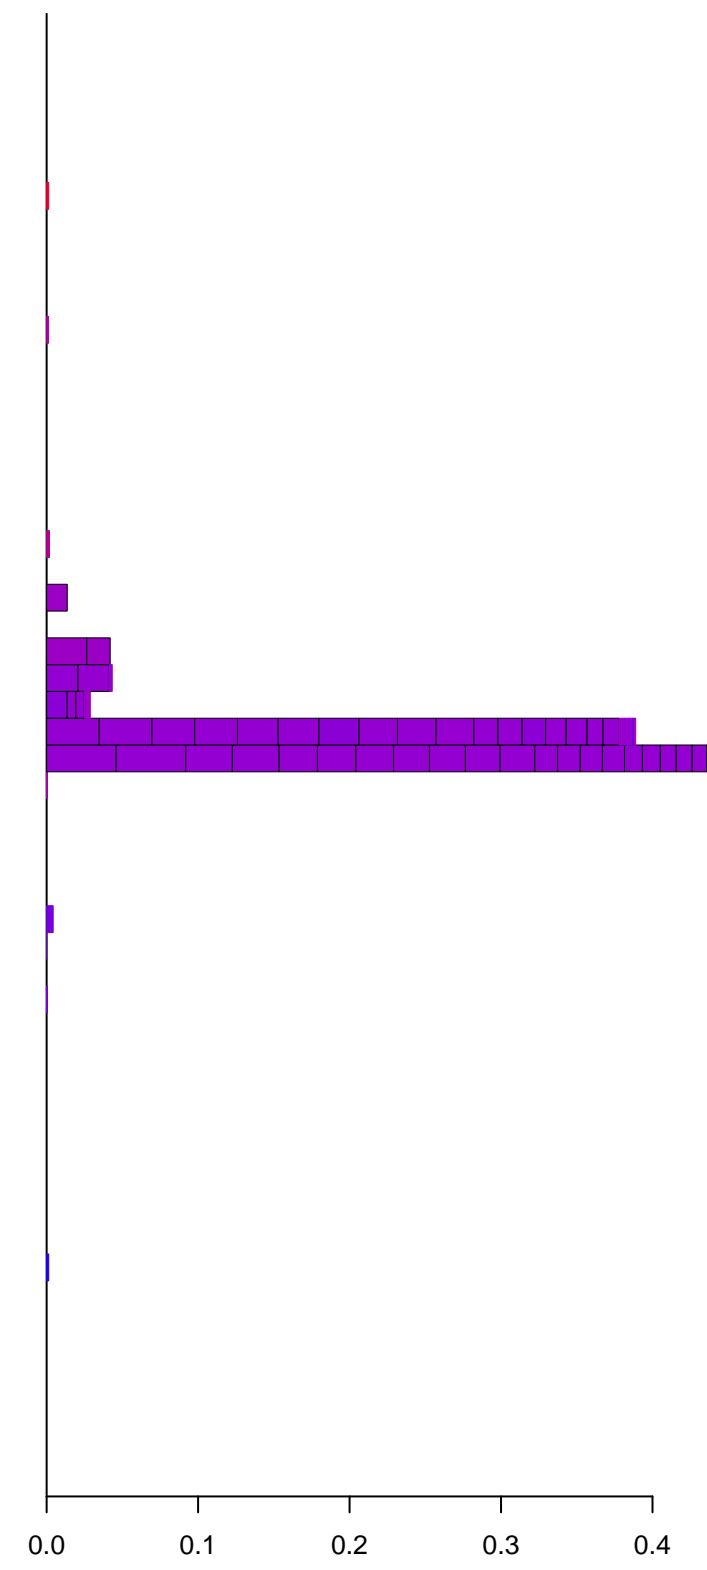



$\hat{\alpha} = 0.21$ , purity:  $\hat{\alpha} = 2.13$ ,  $\hat{\alpha}_g = 2.18$   
 $\theta_z = 0.01$ ,  $\theta_a = 1.504$ , WGD=0  
 SCNA LL = -264.5, SSNV LL = -8472.13, SCNA Ev = -39.32484

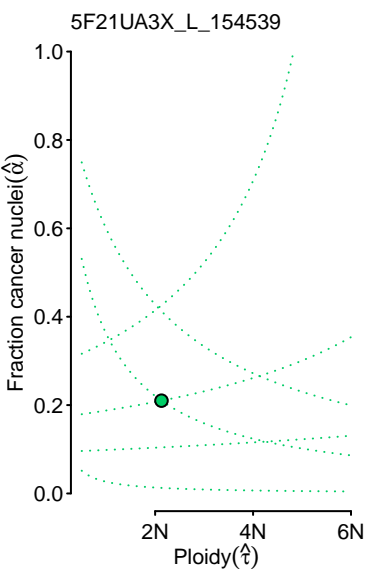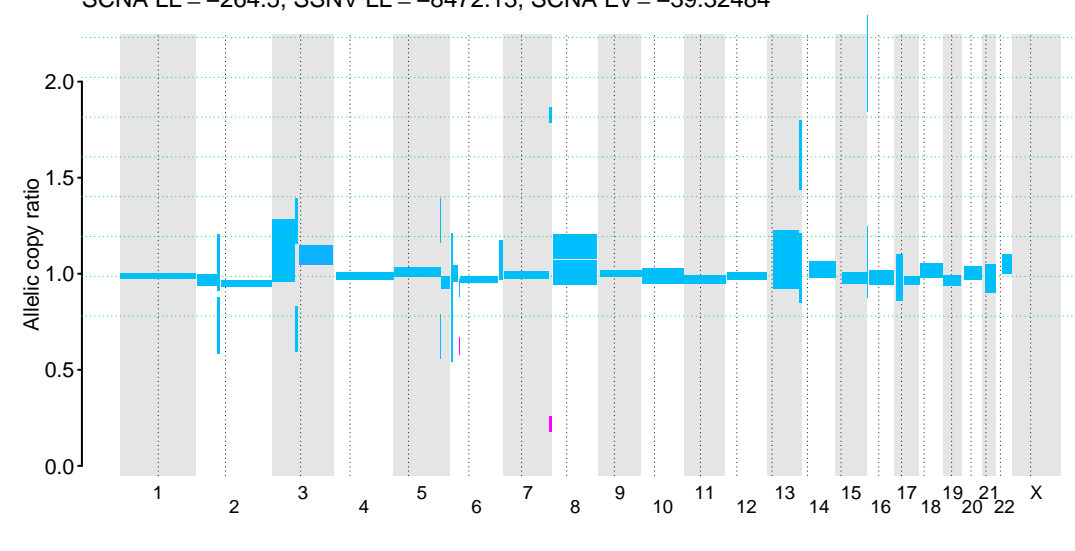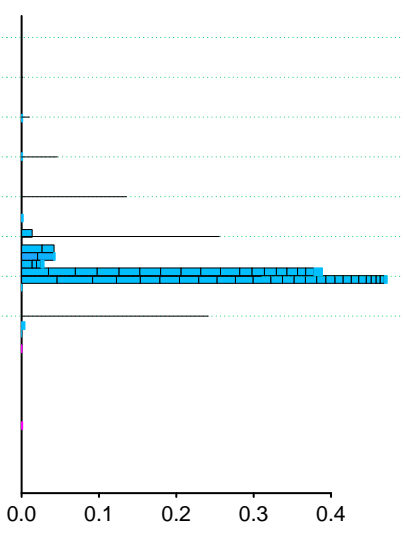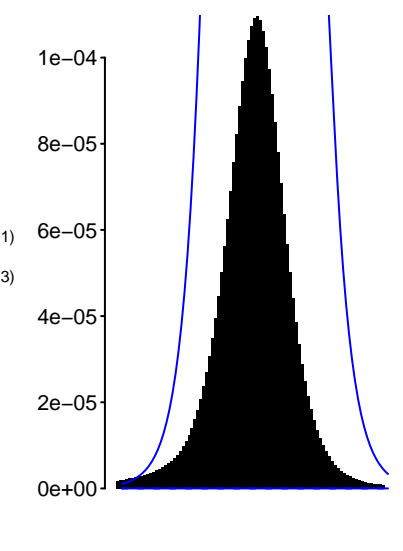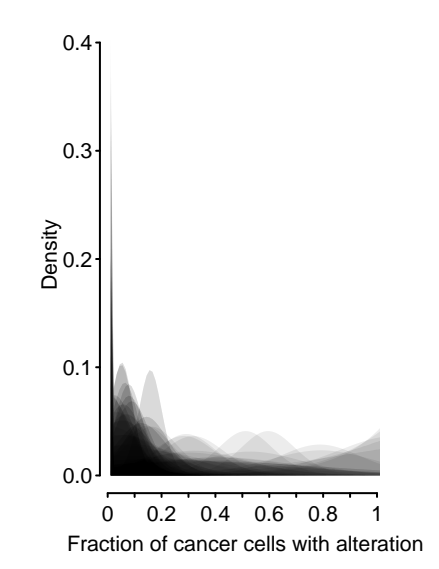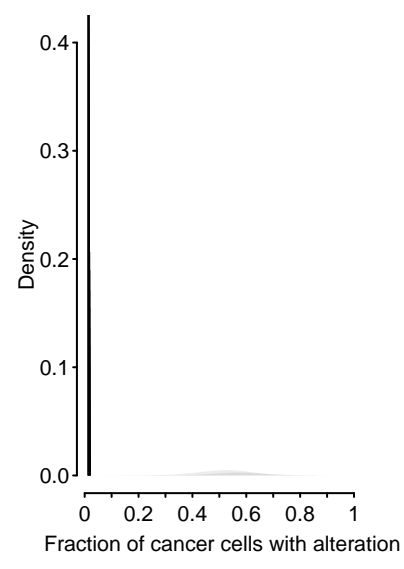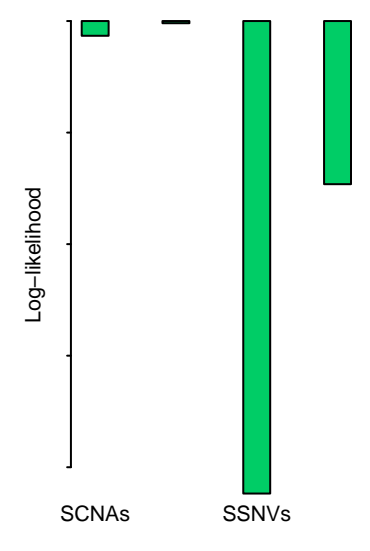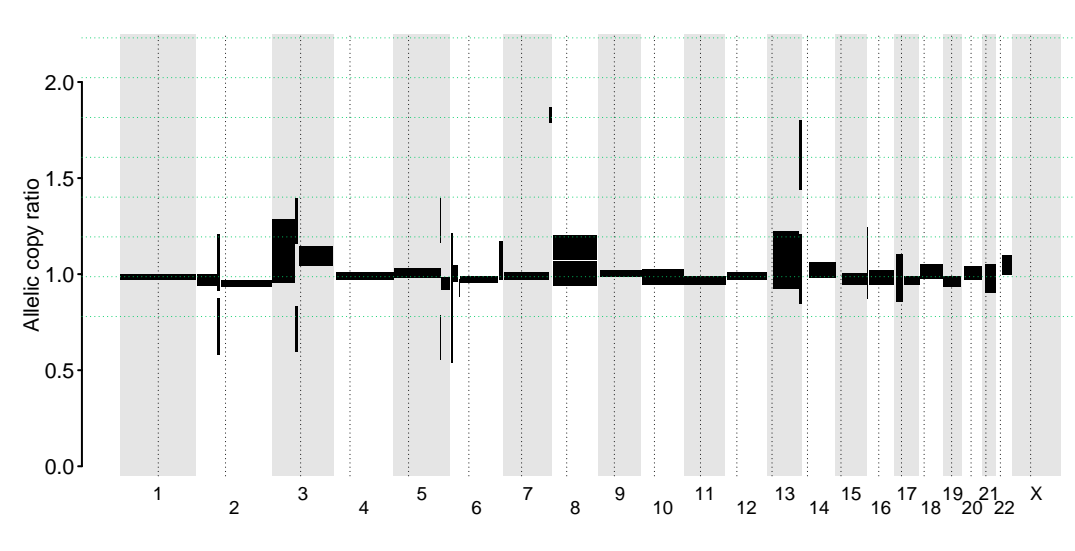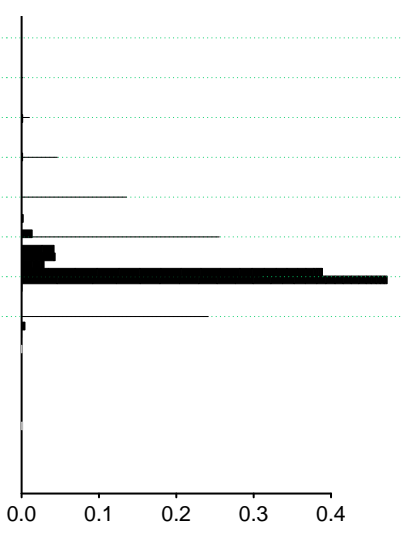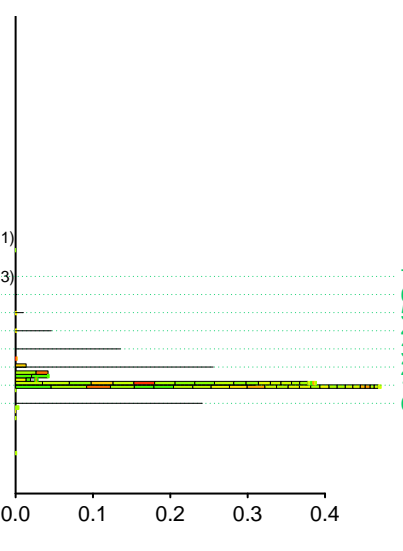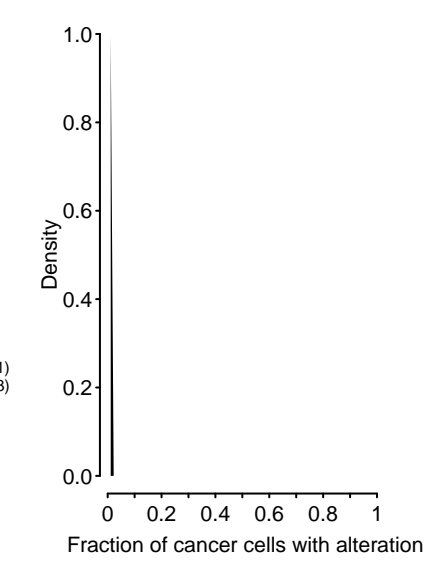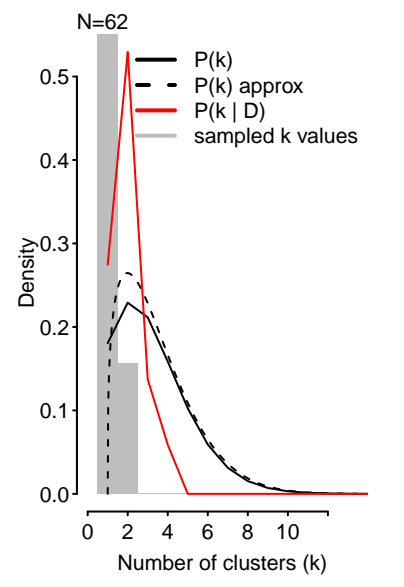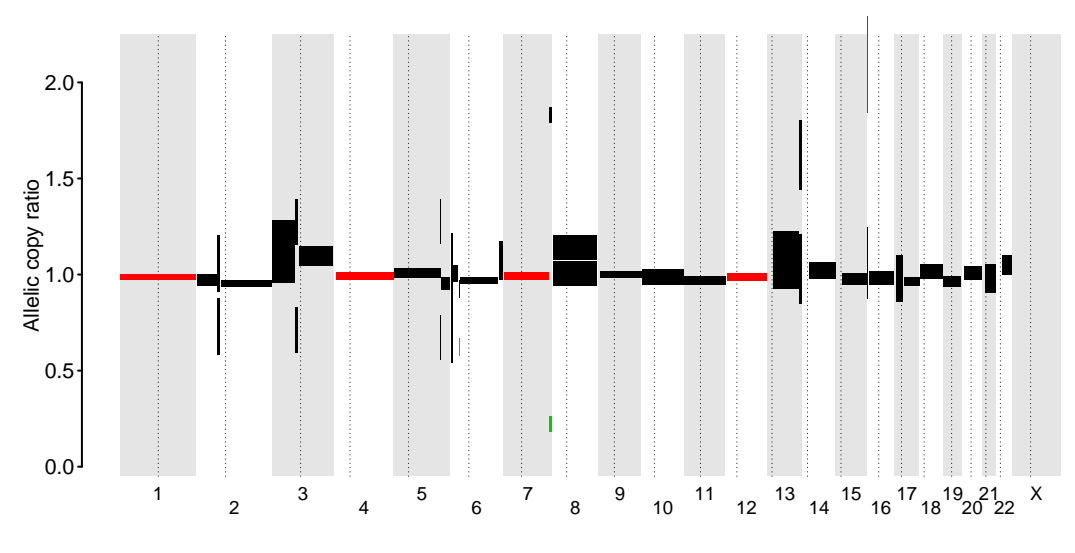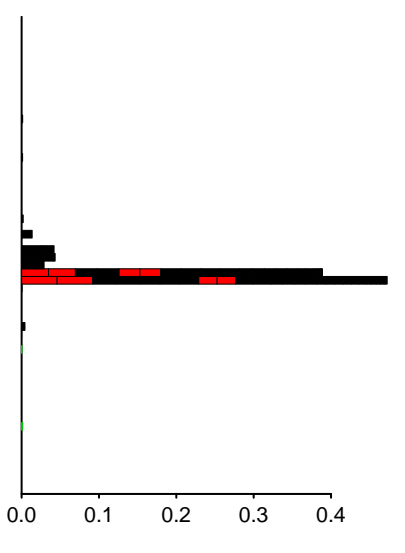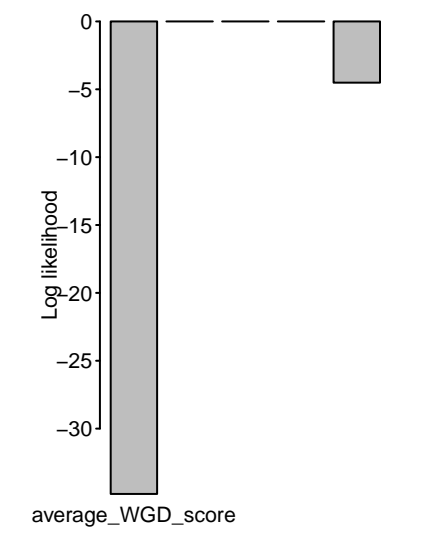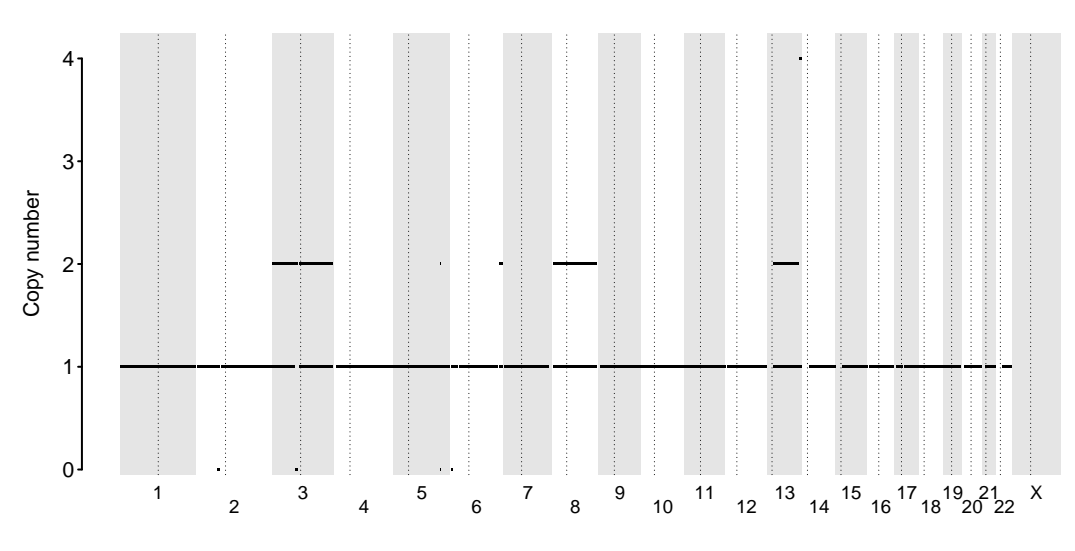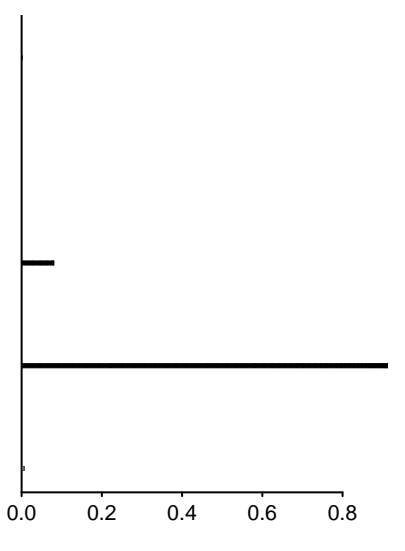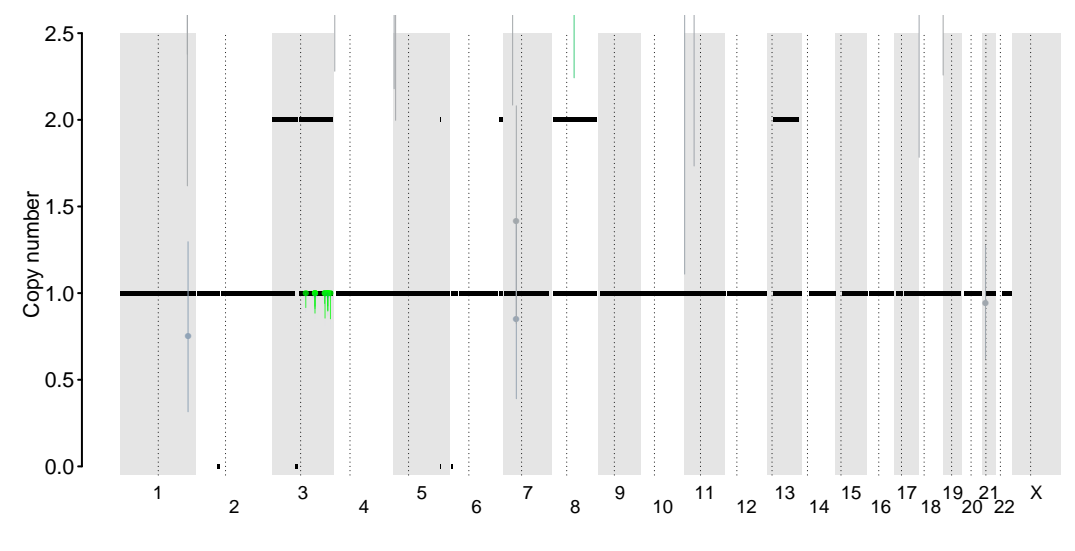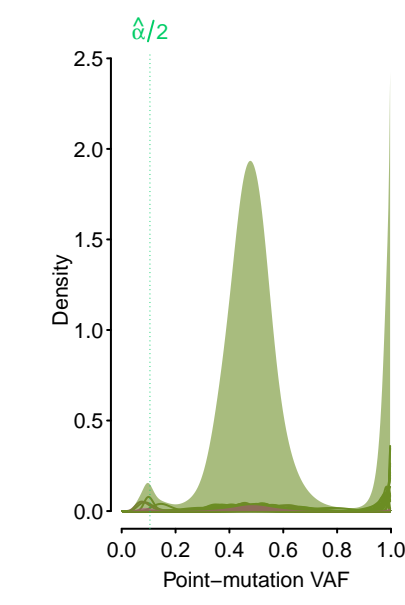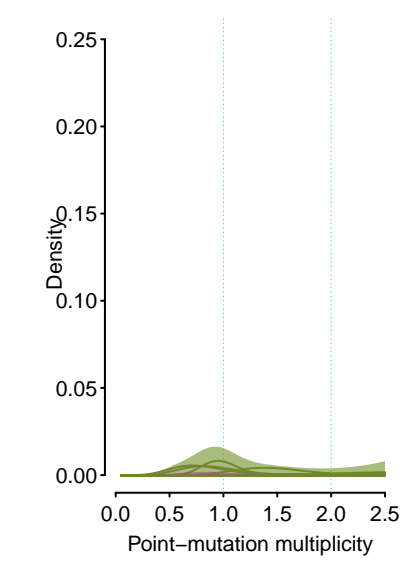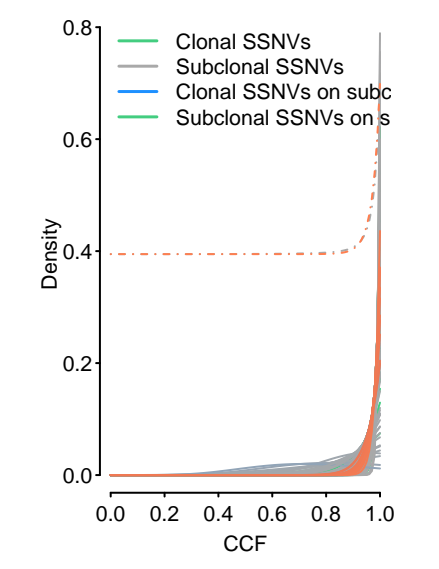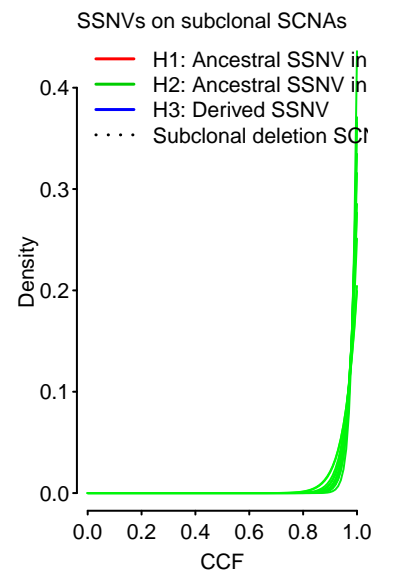



Sample 46

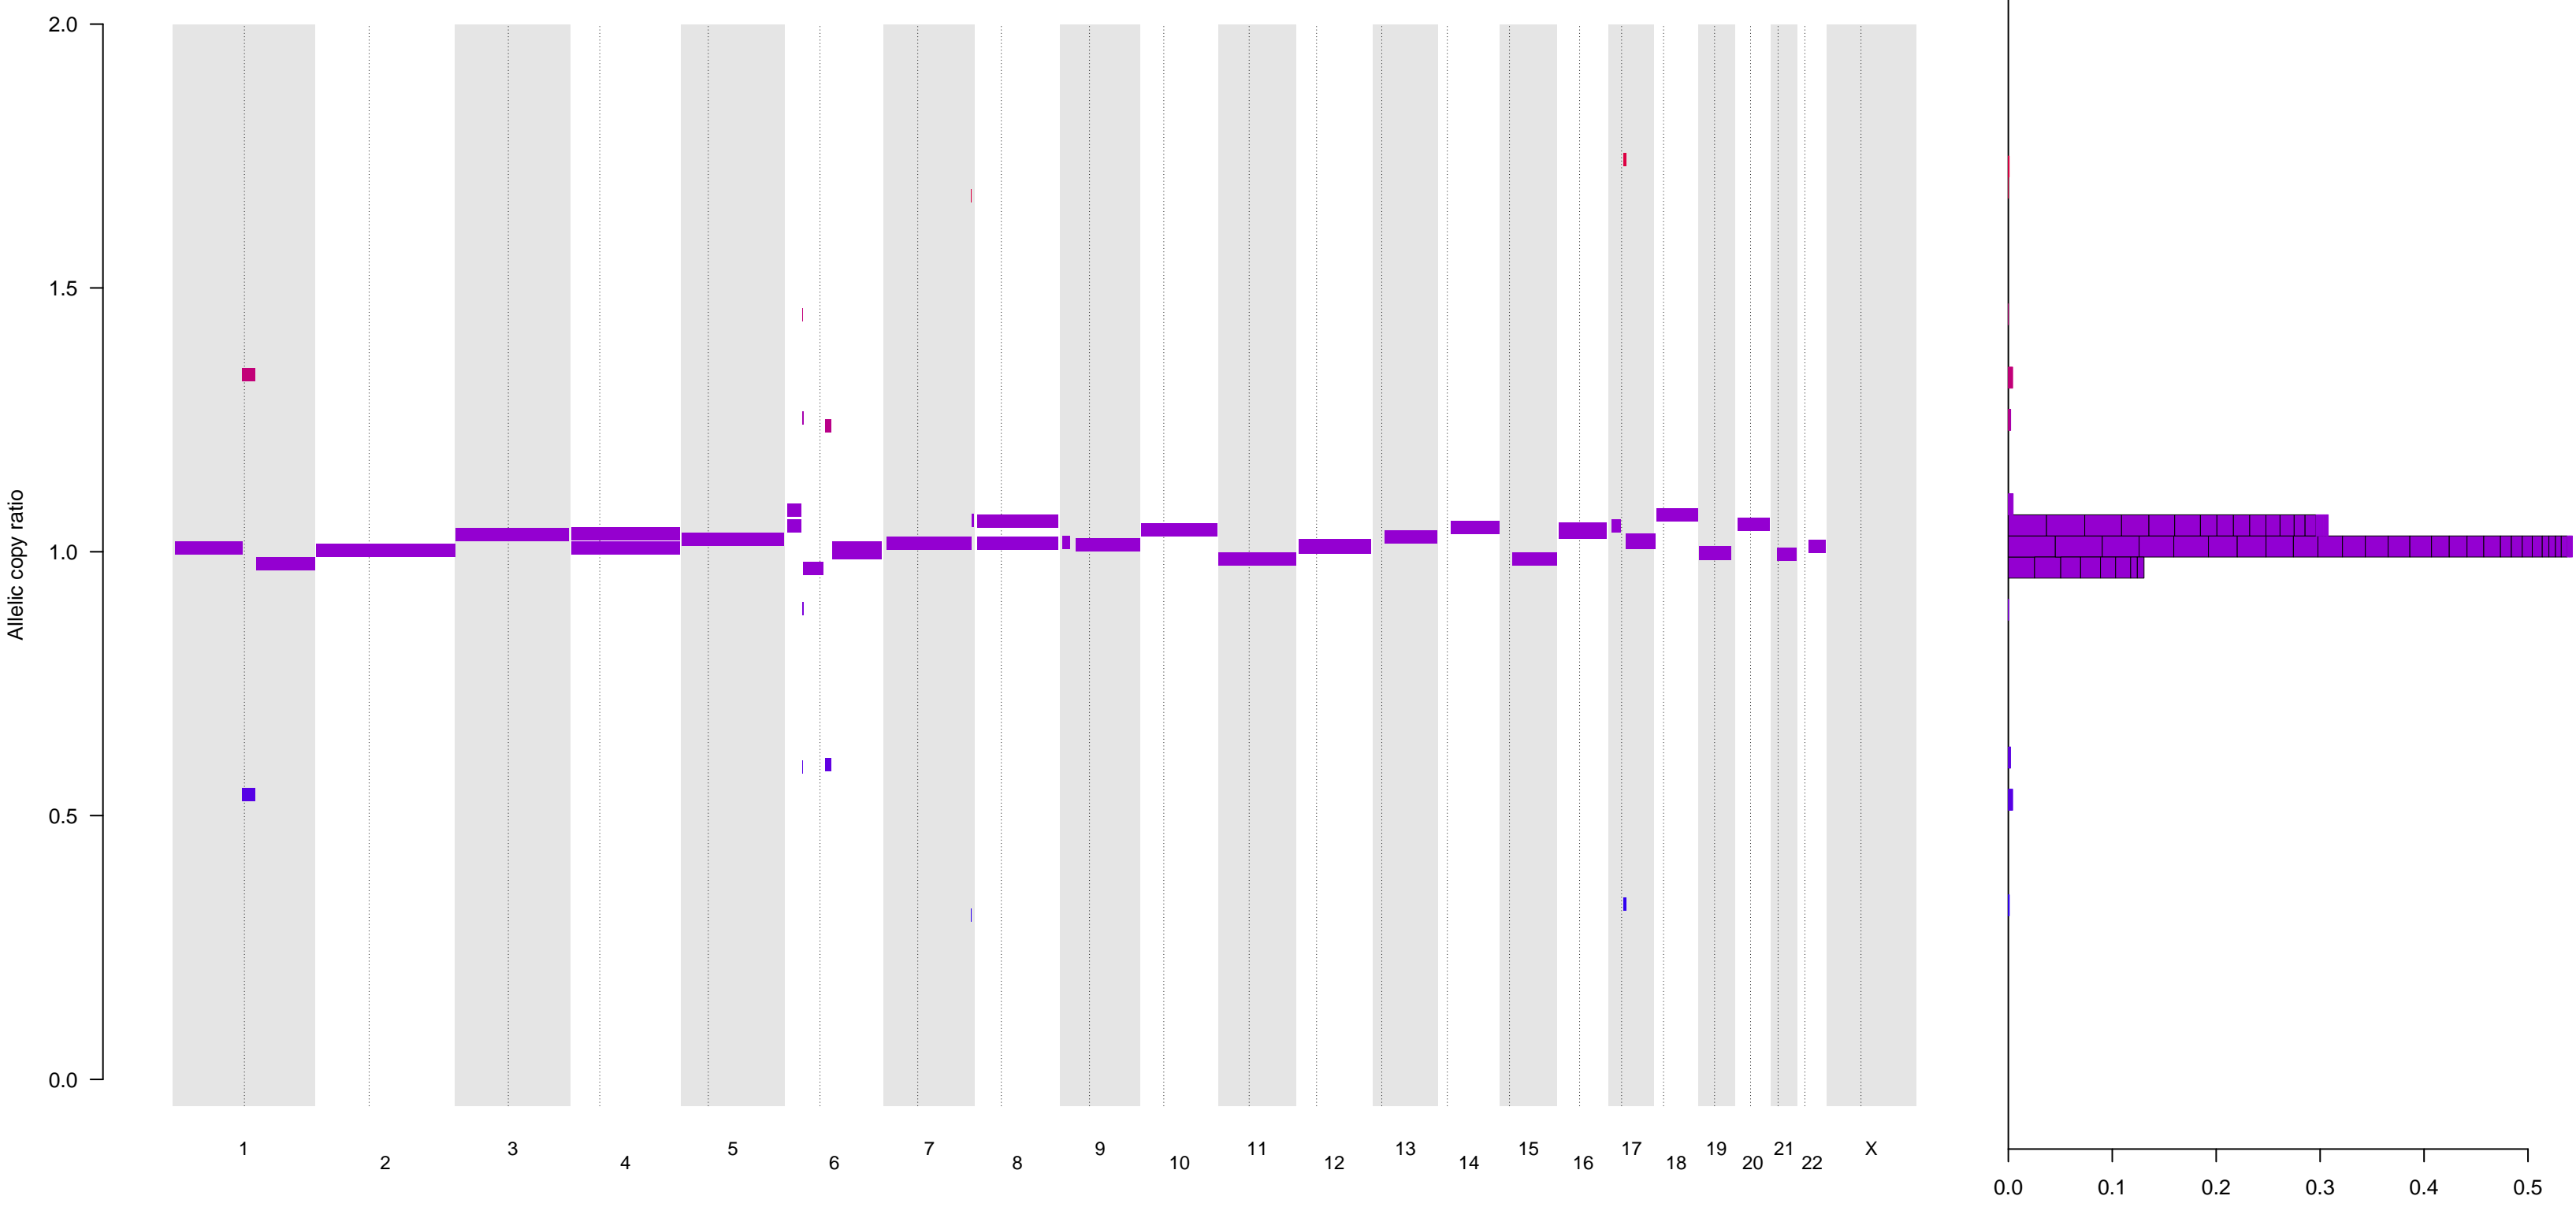

purity( $\hat{\alpha}$ ) = 0.26, ploidy:  $\hat{\tau} = 1.92$ ,  $\hat{\tau}_g = 2$   
 $\theta_z = 0$ ,  $\theta_0 = 1.39$ , WGD=0  
 SCNA LL = -219.63, SSNV LL = -6563.01, SCNA Ev = -29.60161

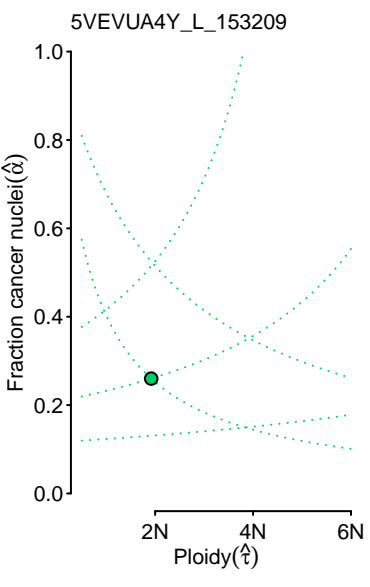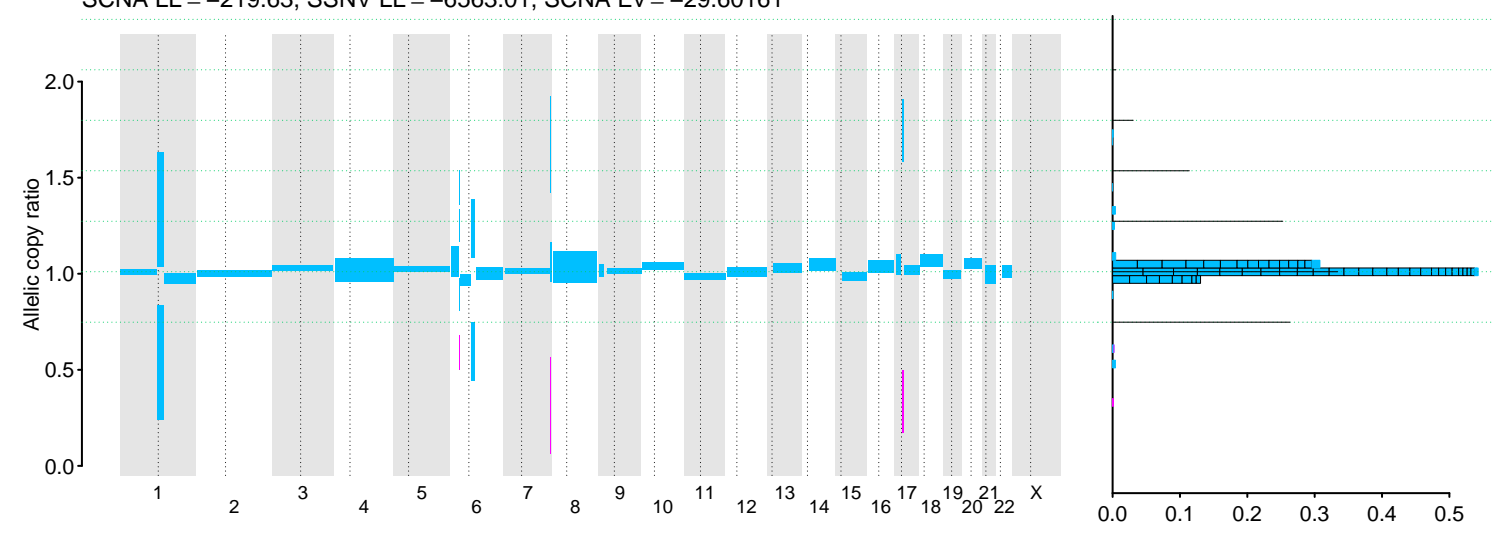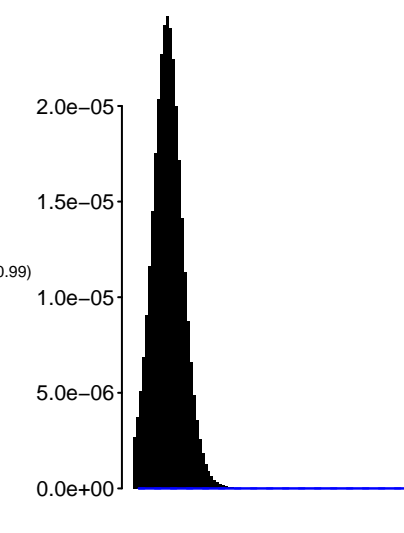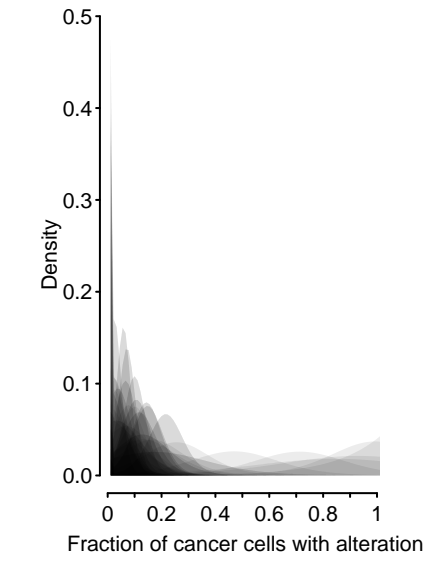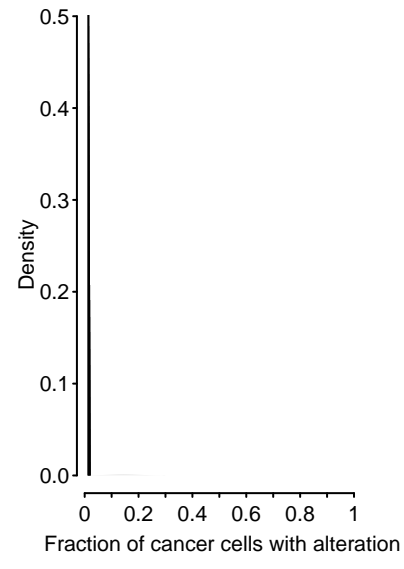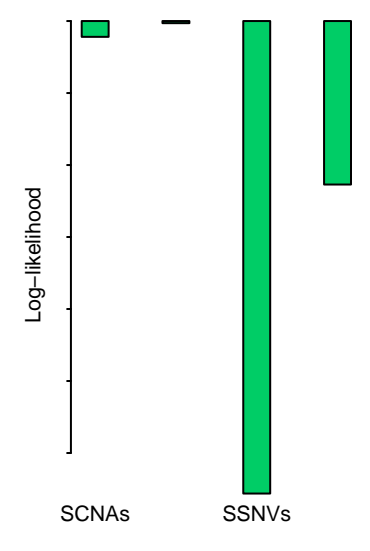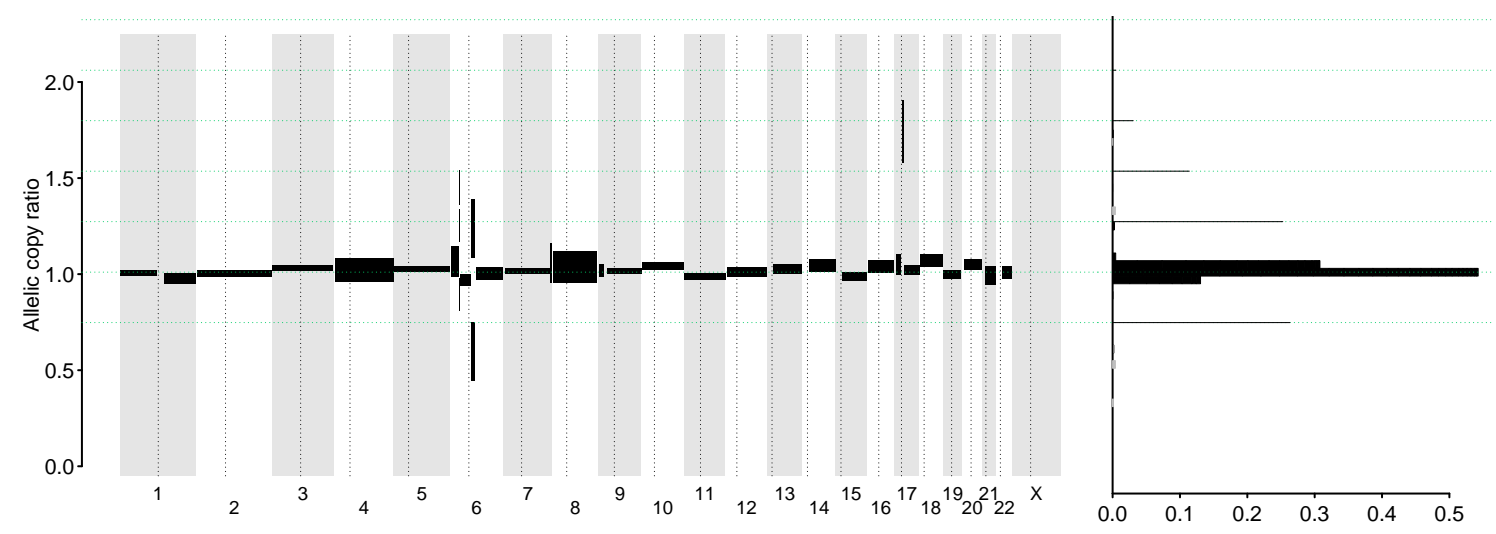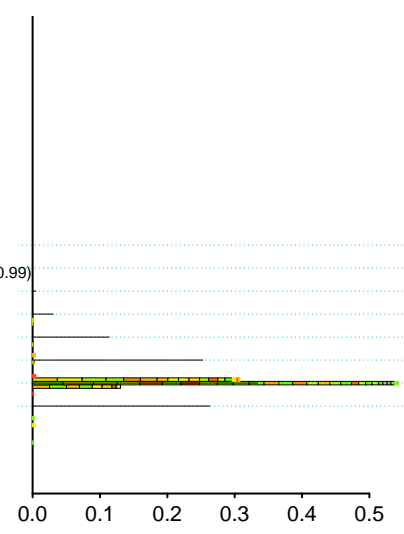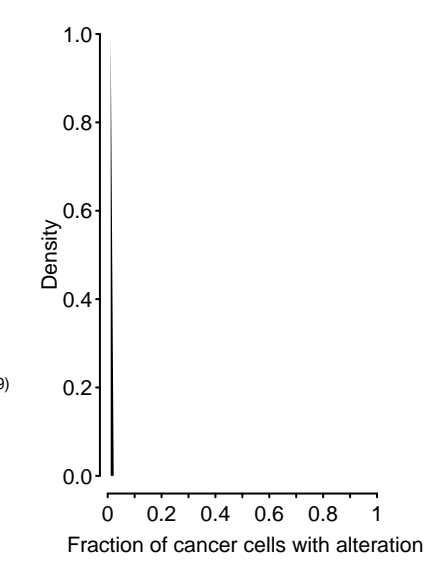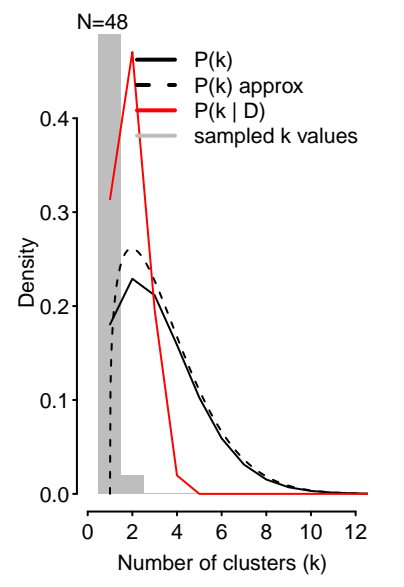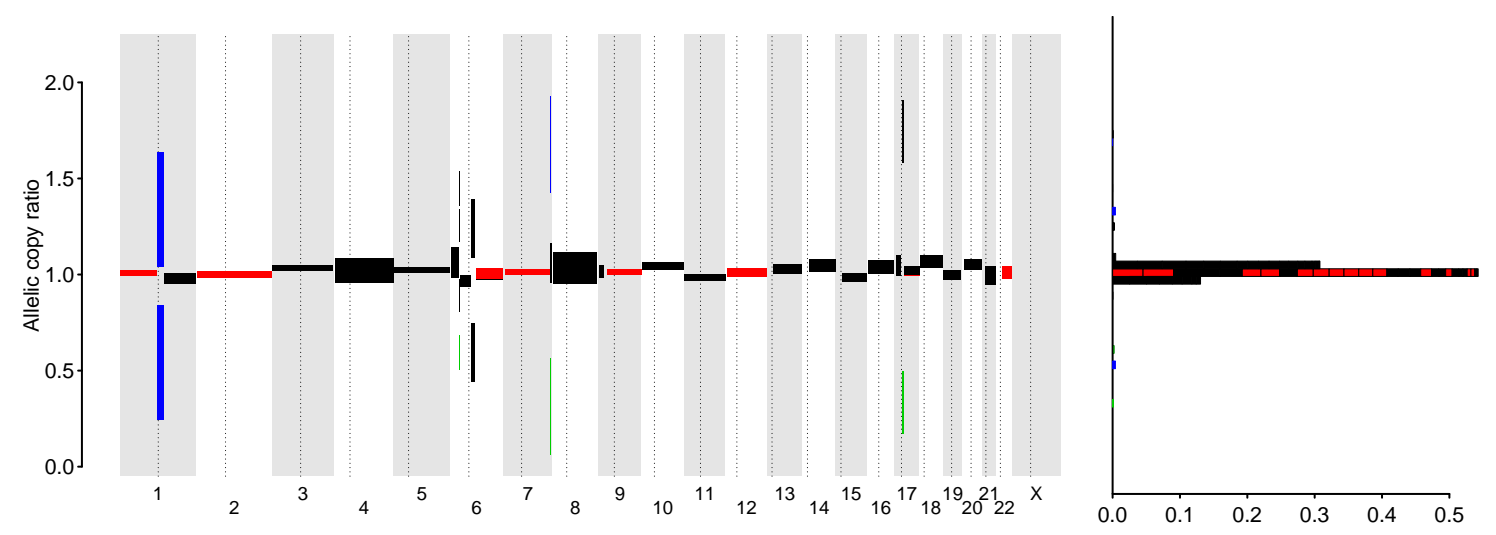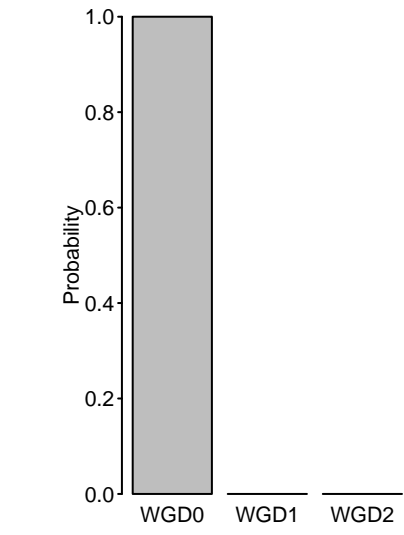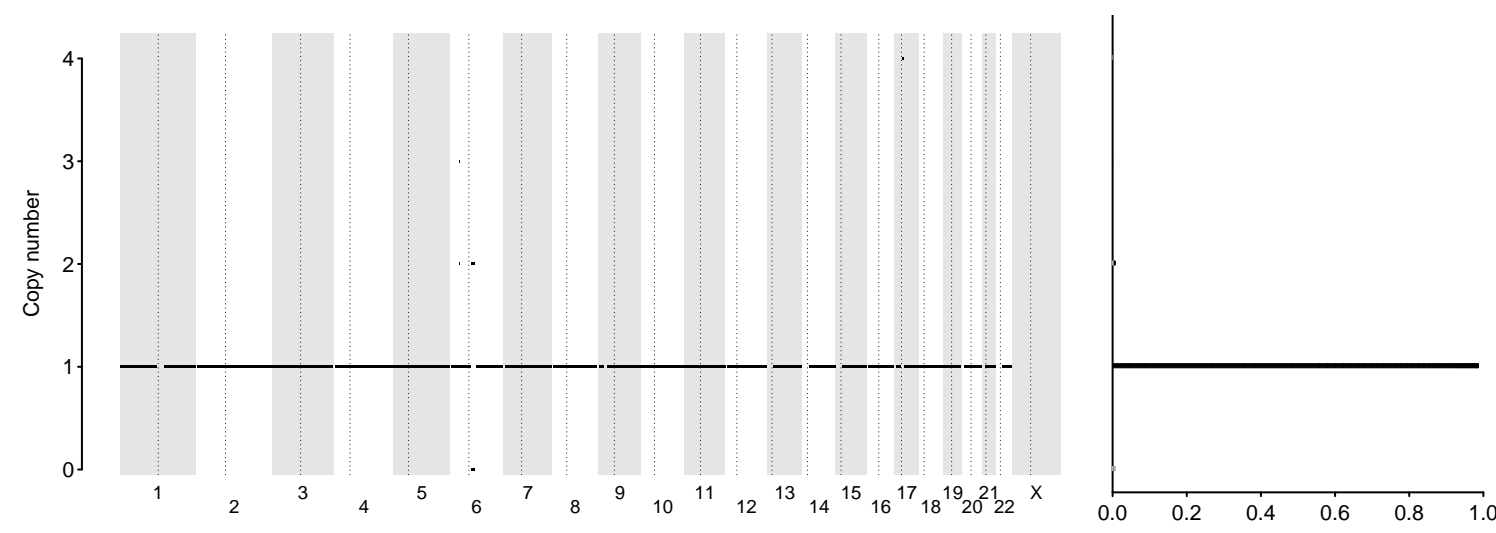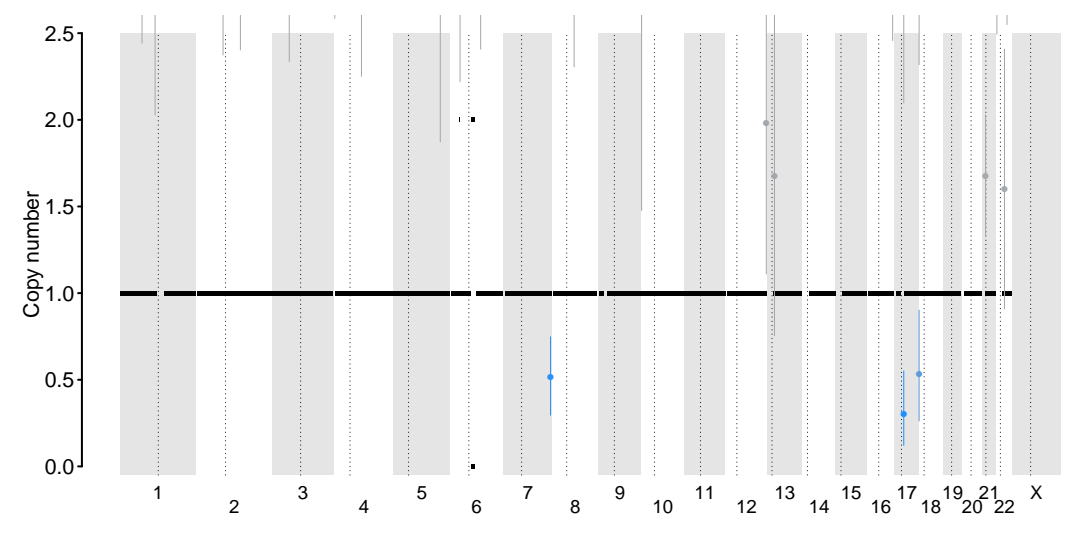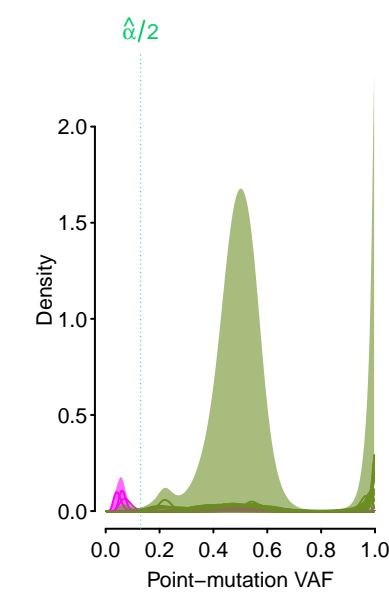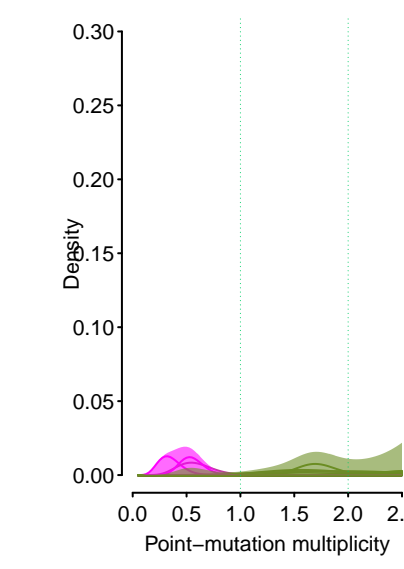

Sample 47

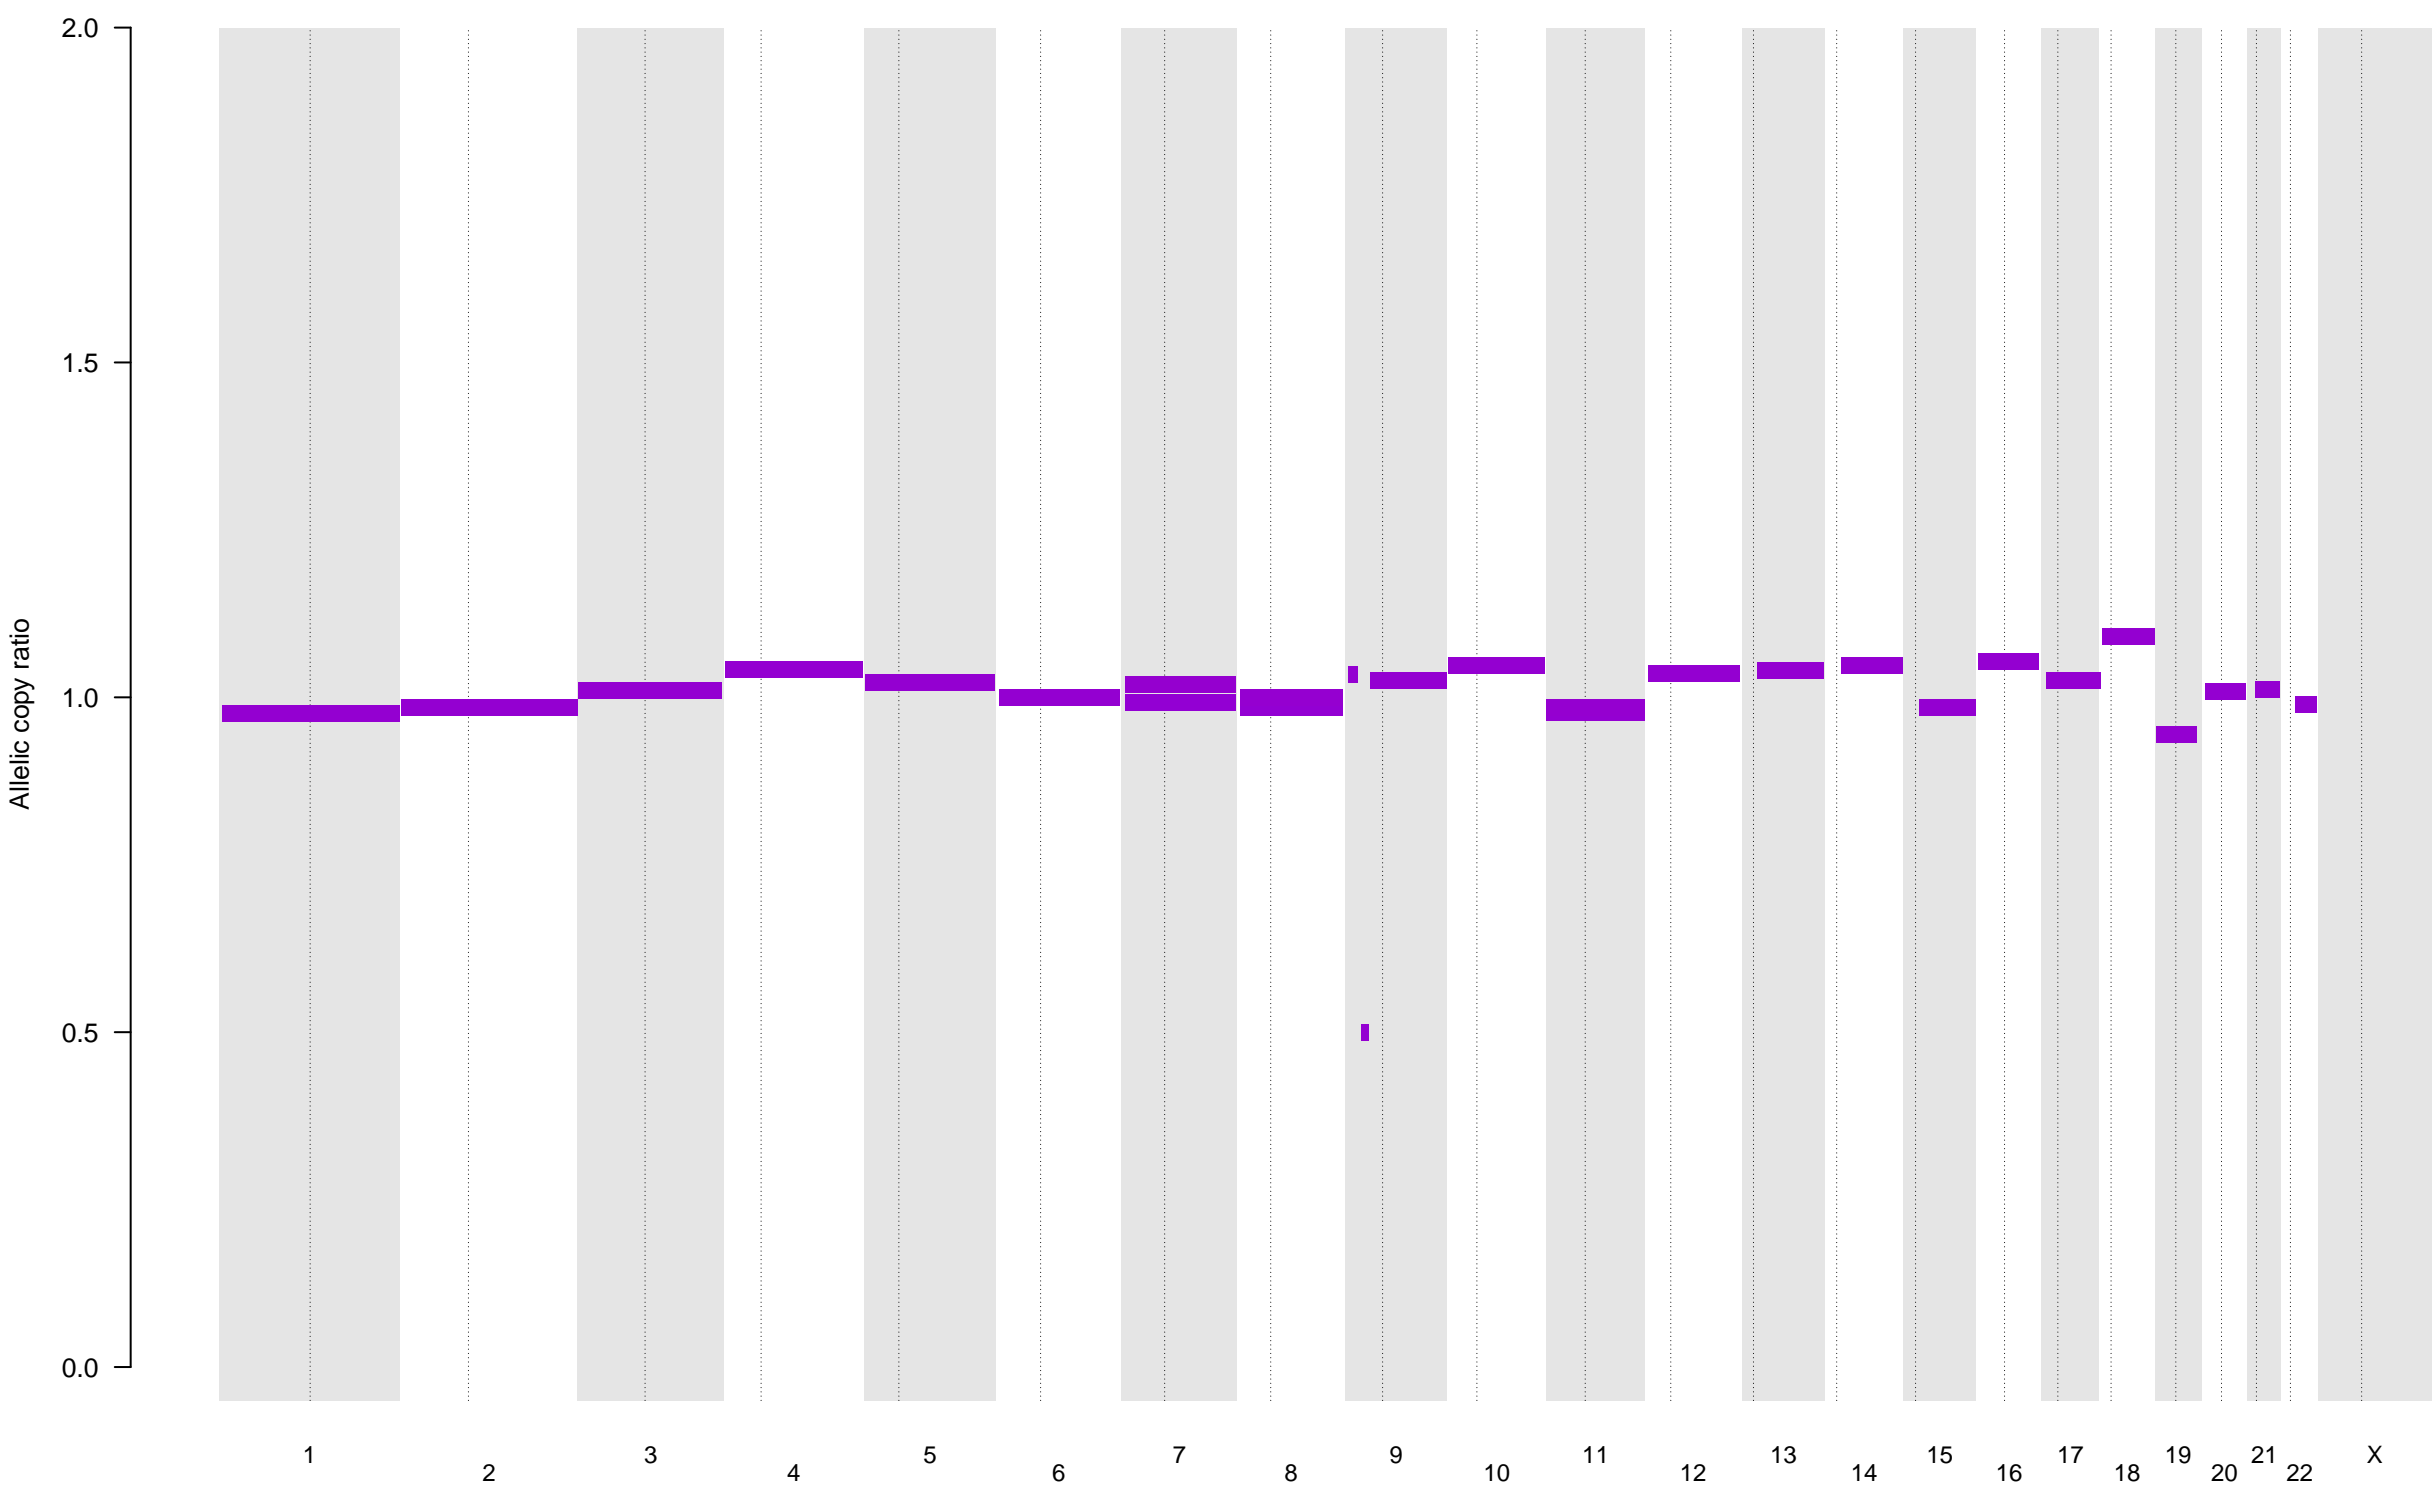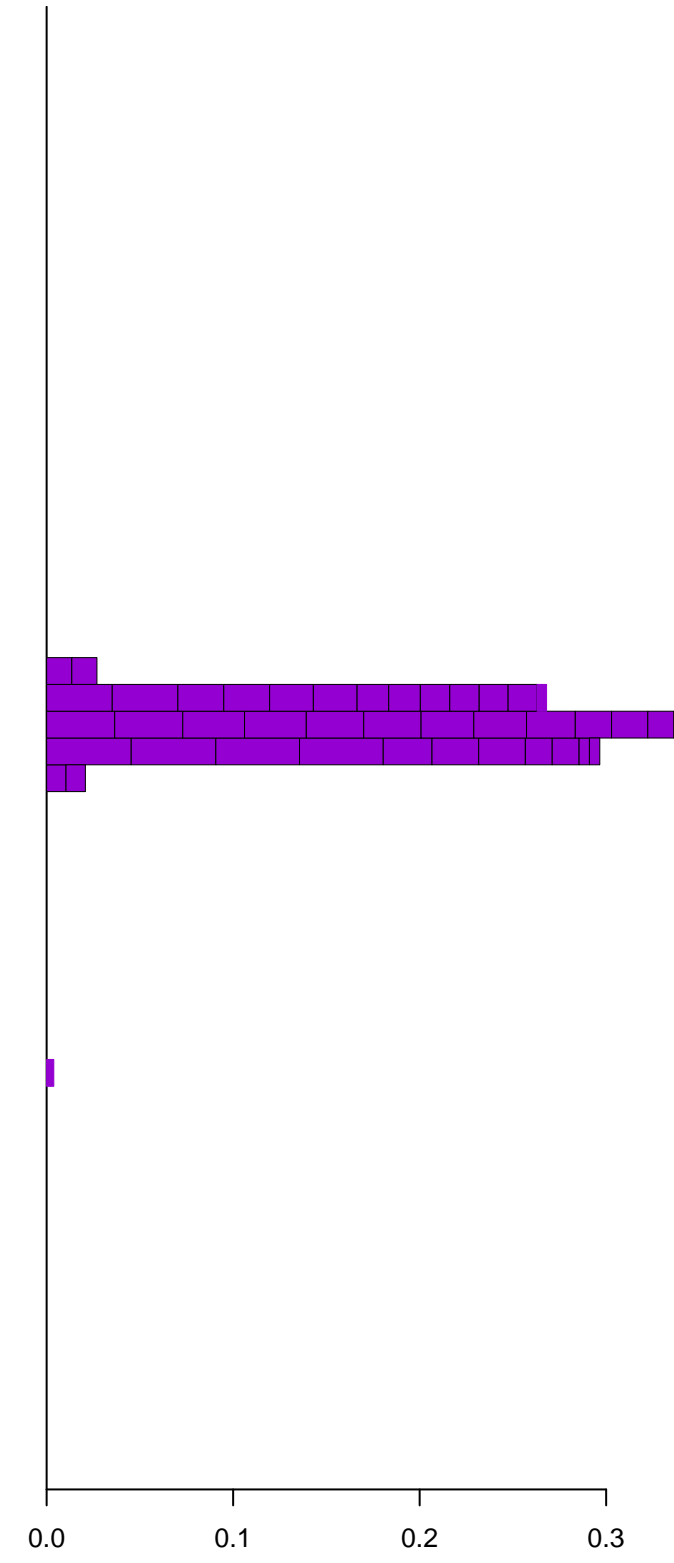

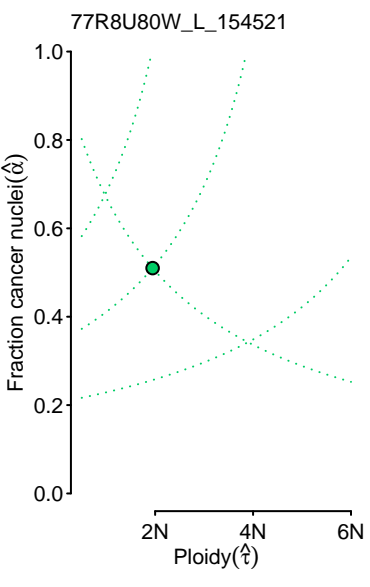

purity( $\hat{\alpha}$ ) = 0.51, ploidy:  $\hat{t} = 1.95$ ,  $\hat{t}_g = 1.99$   
 $\theta_z = 0$ ,  $\theta_0 = 1.163$ , WGD=0  
 SCNA LL = -112.59, SSNV LL = -1416.98, SCNA Ev = -29.60161

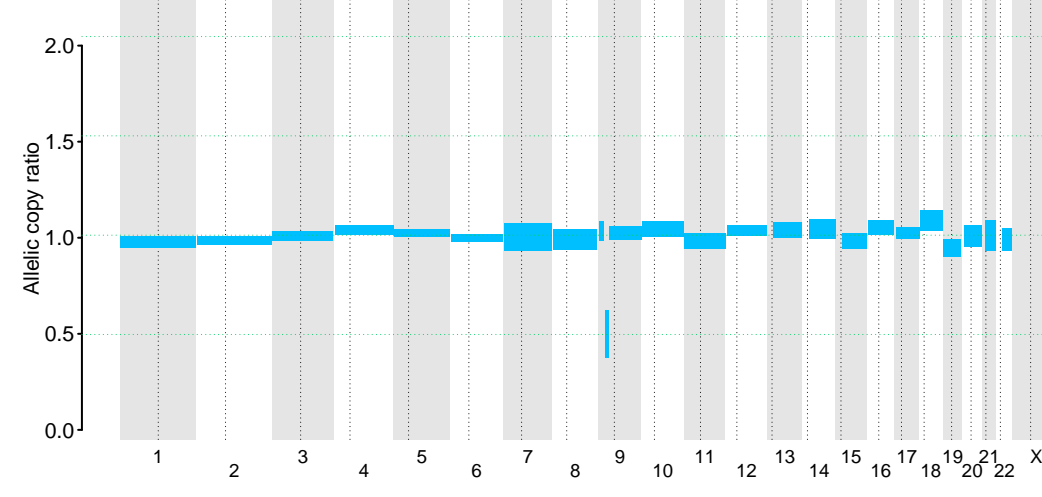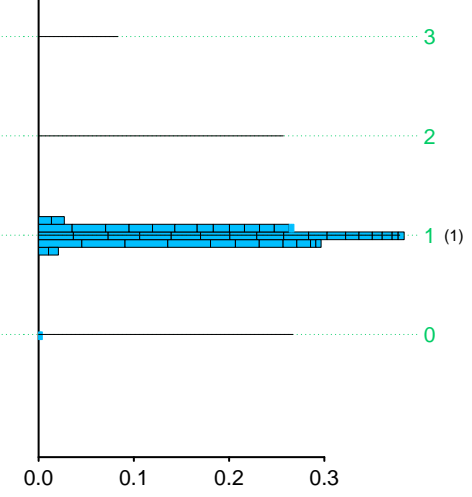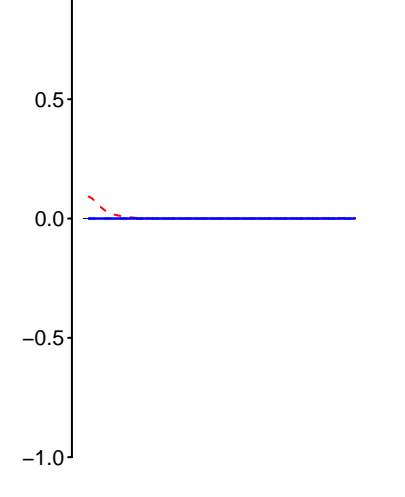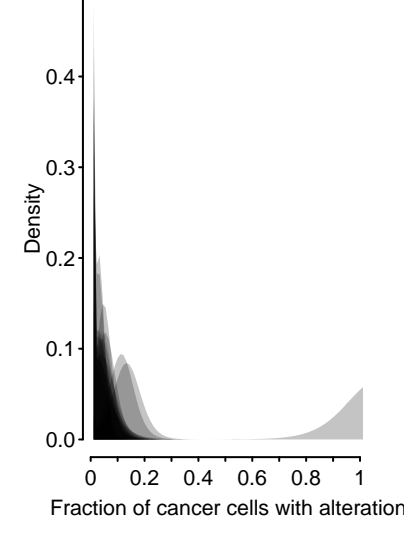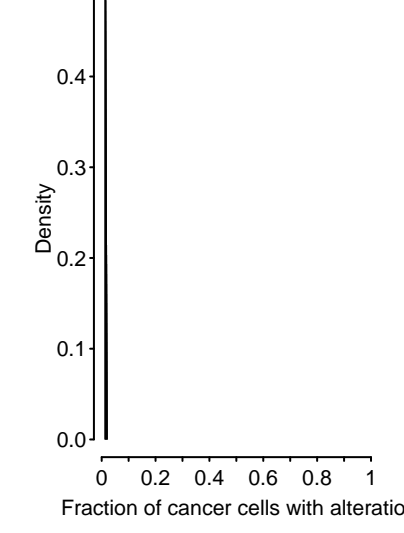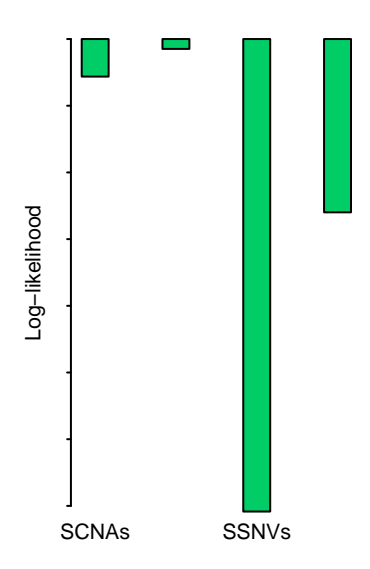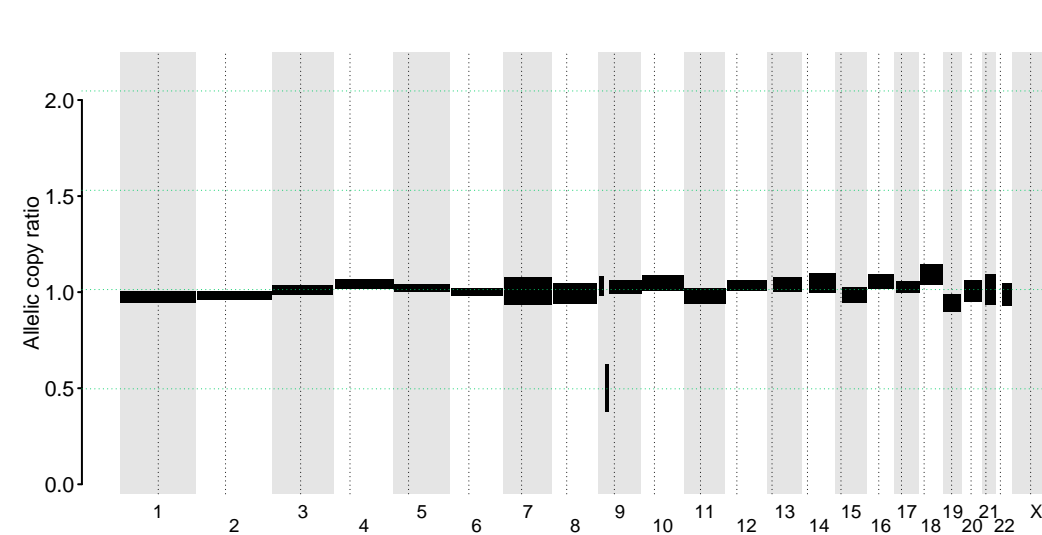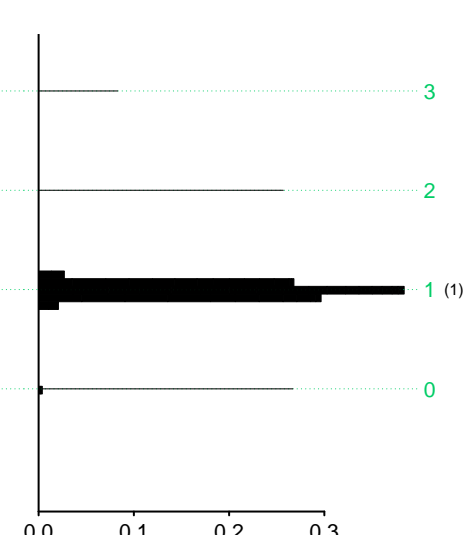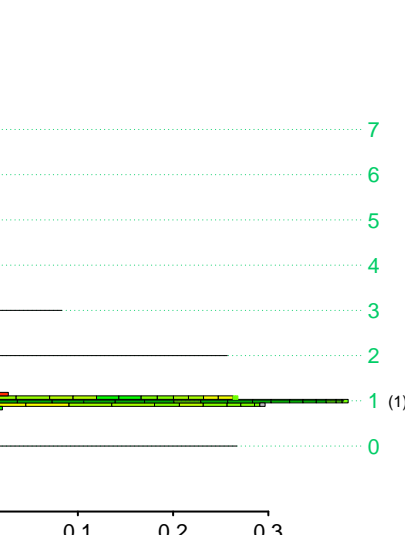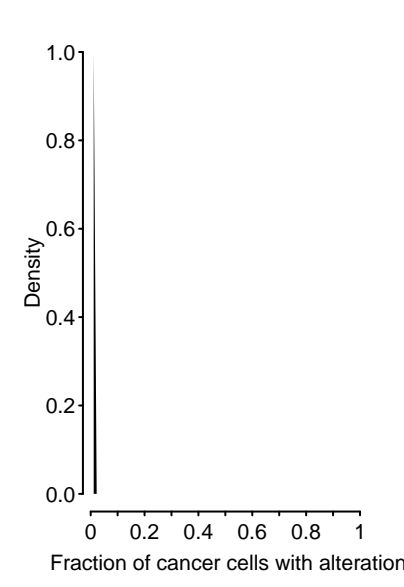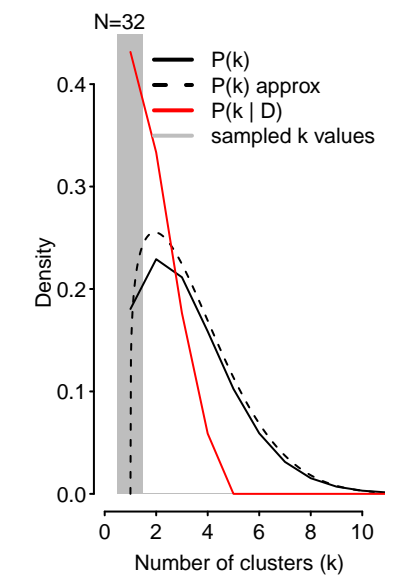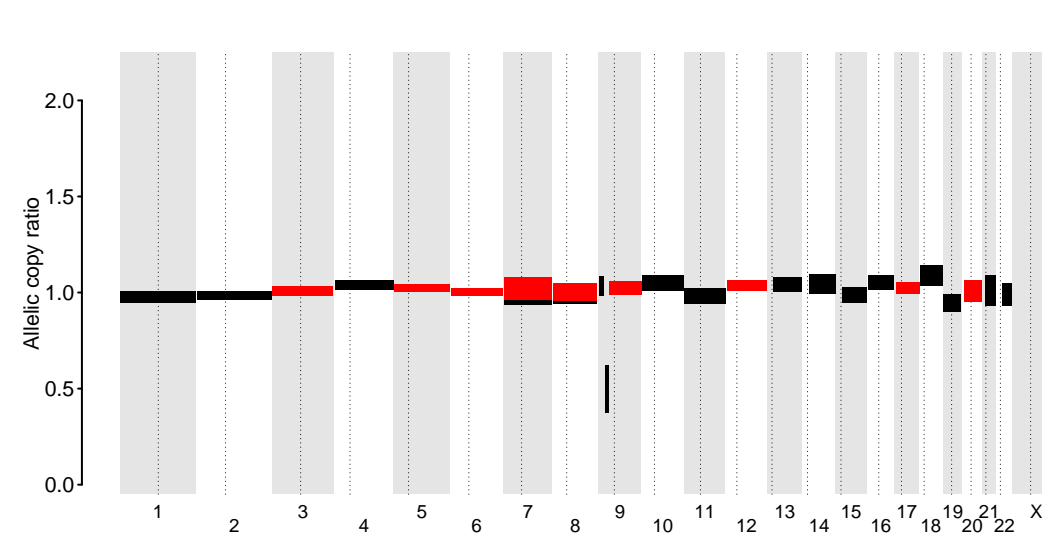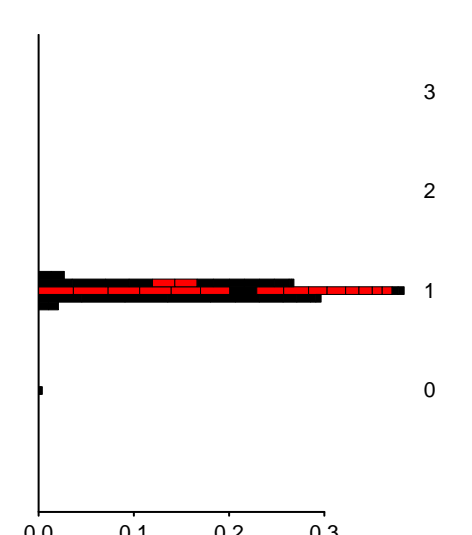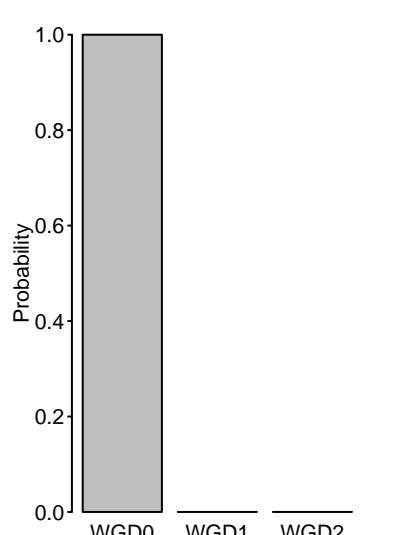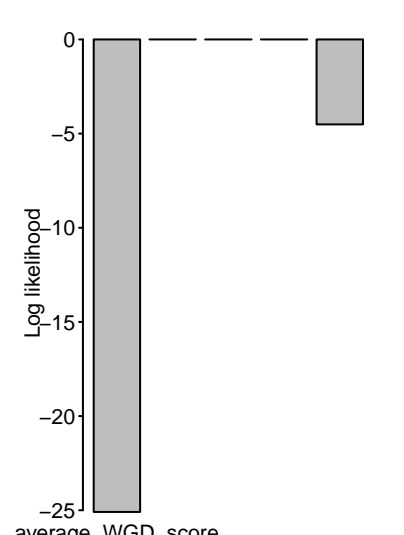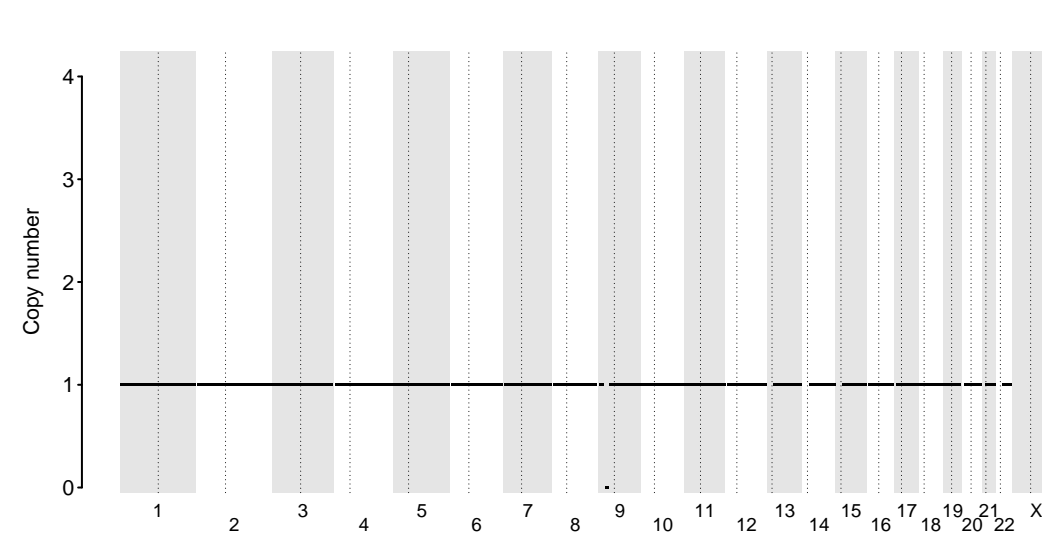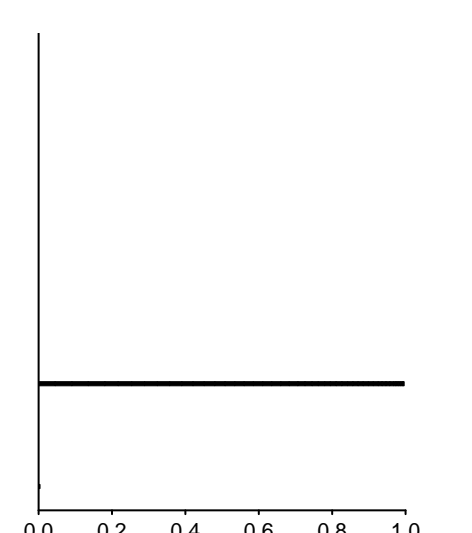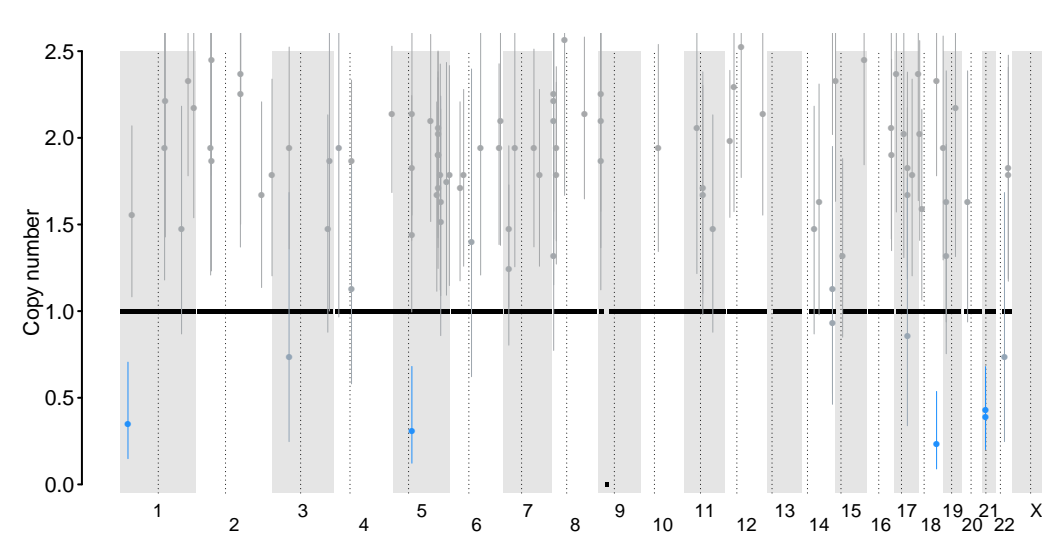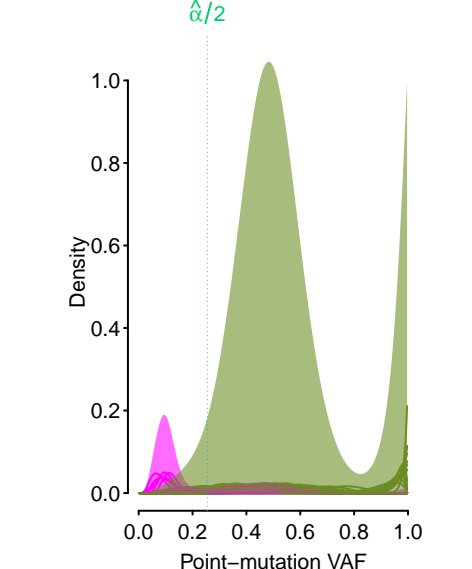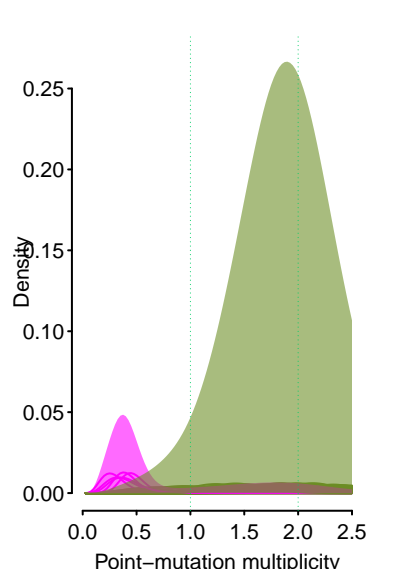

Sample 48

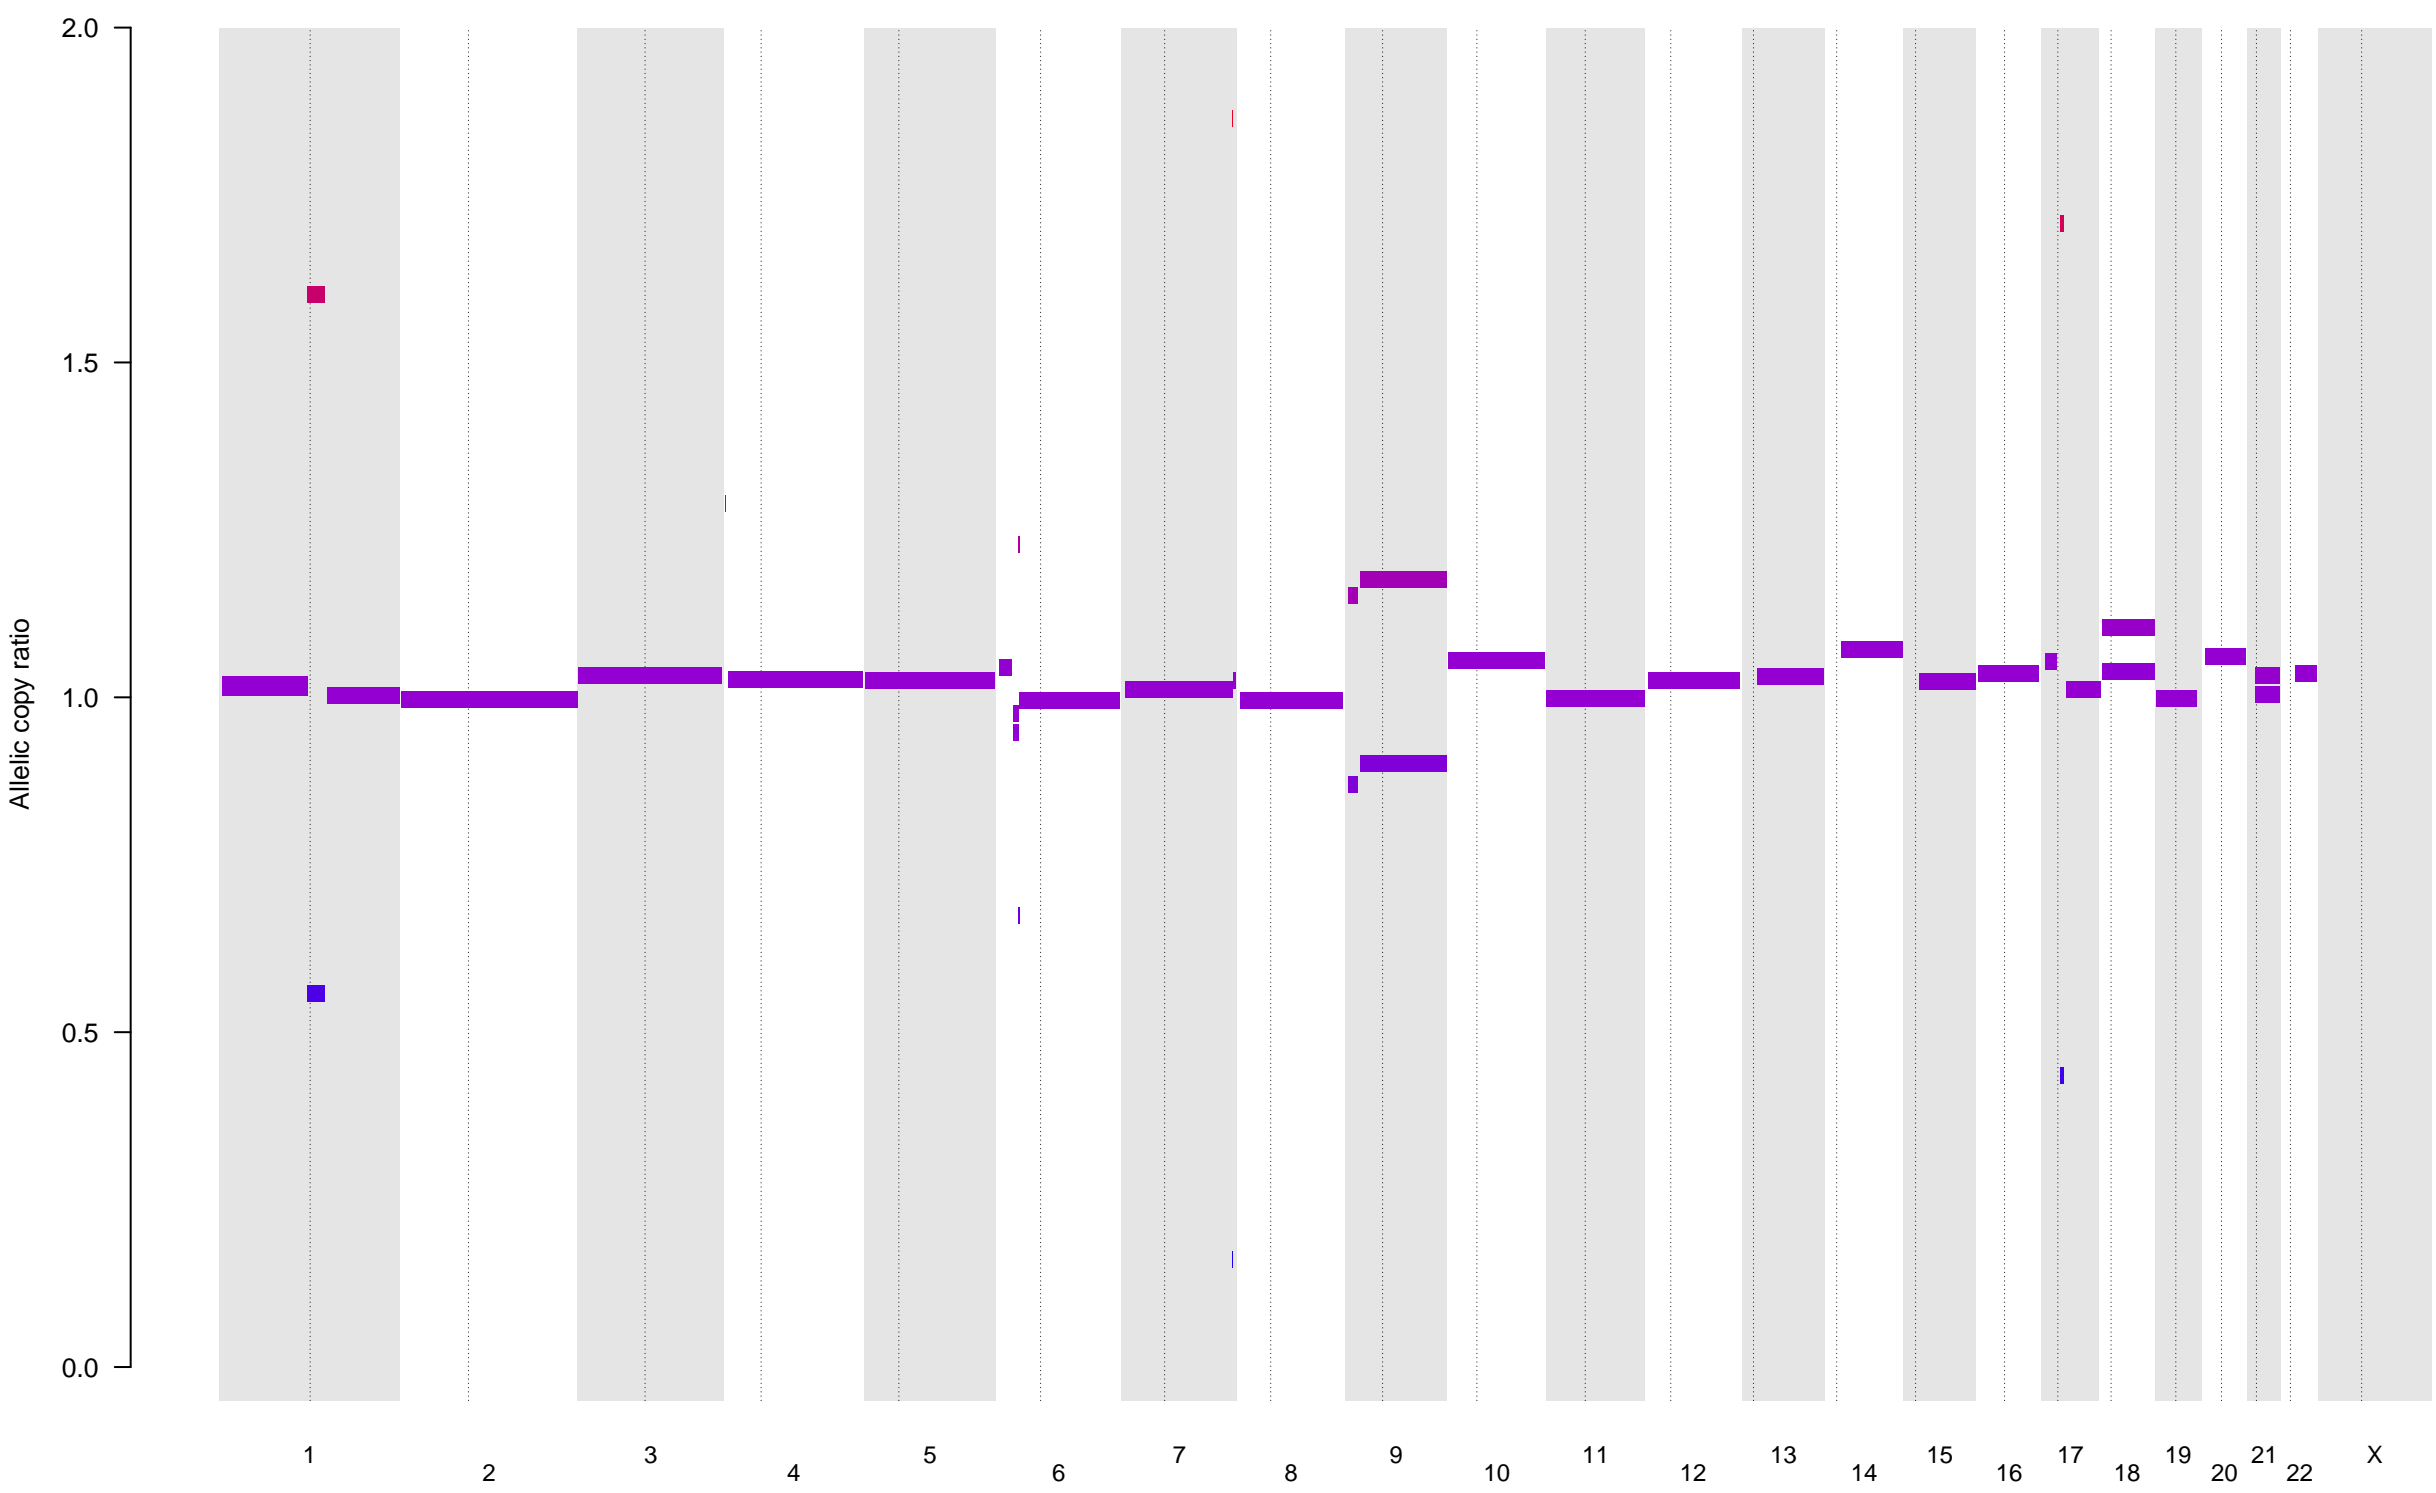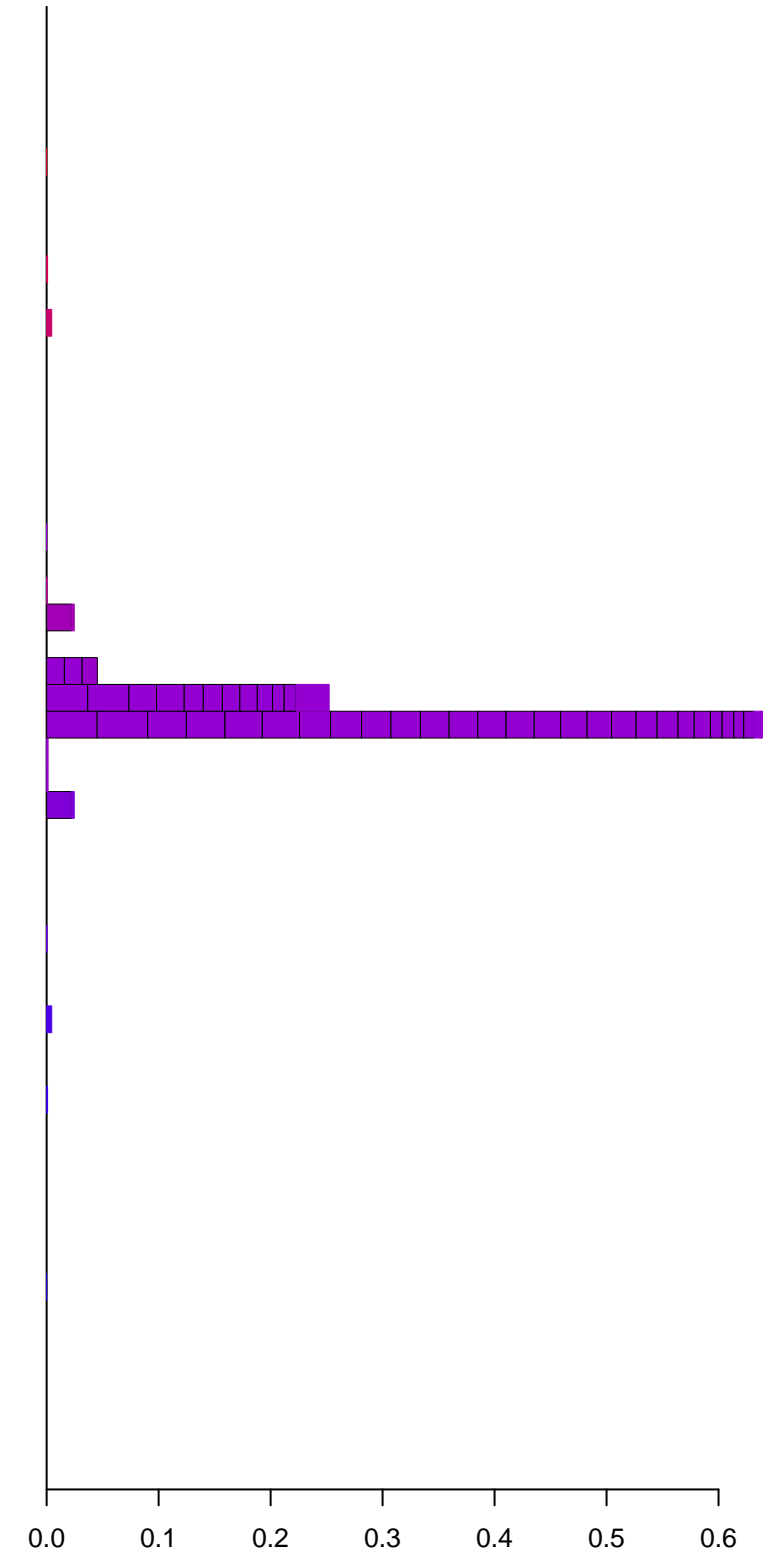

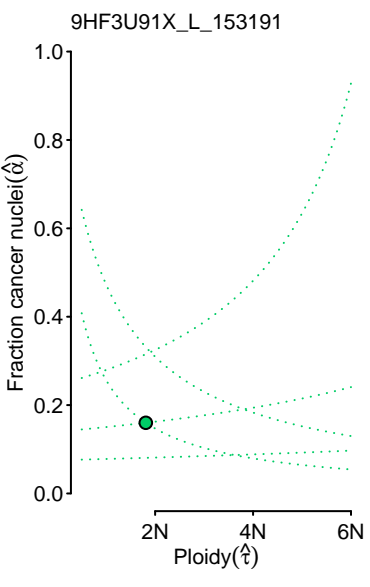

purity( $\hat{\lambda}$ ) = 0.16, ploidy:  $\hat{\tau} = 1.81$ ,  $\hat{\tau}_g = 2.04$   
 $\hat{\theta}_z = 0.02$ ,  $\hat{\theta}_a = 1.875$ , WGD=0  
 SCNA LL = -270.19, SSNV LL = -13099.83, SCNA Ev = -41.24631

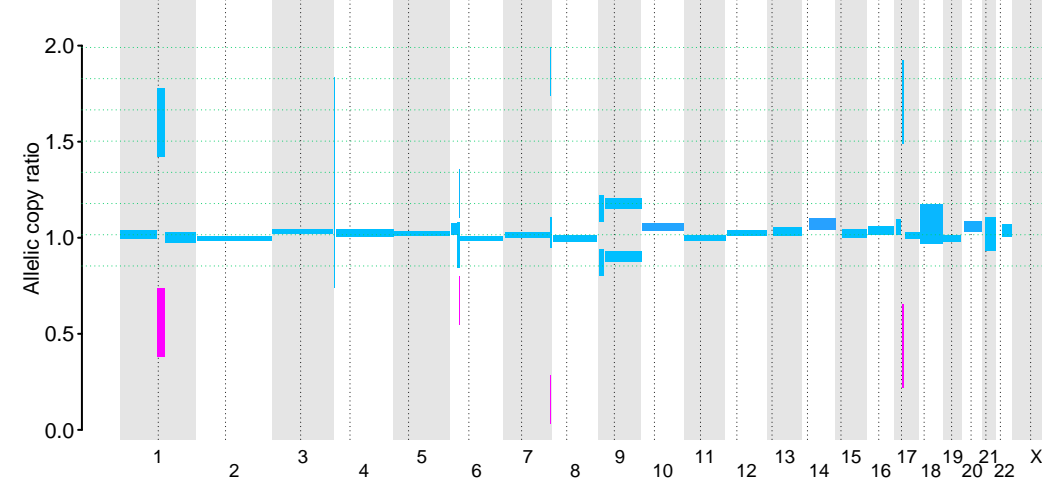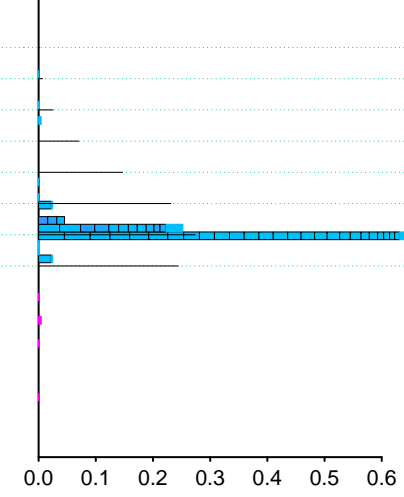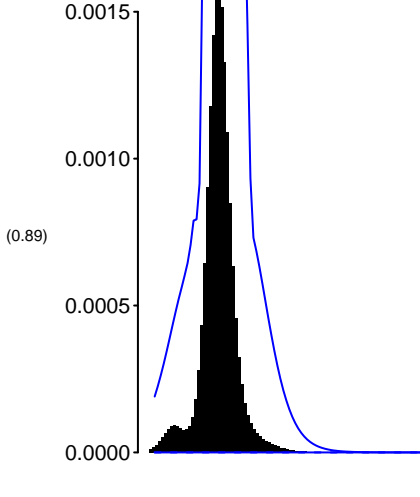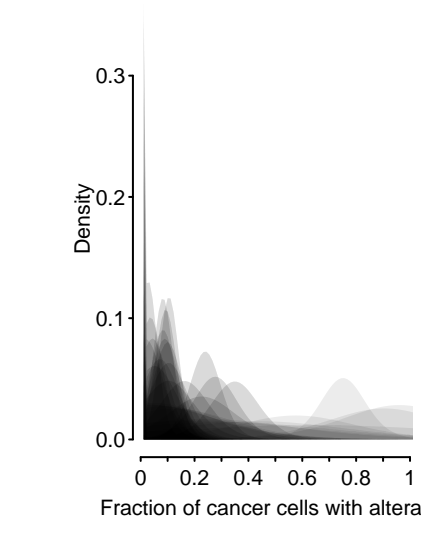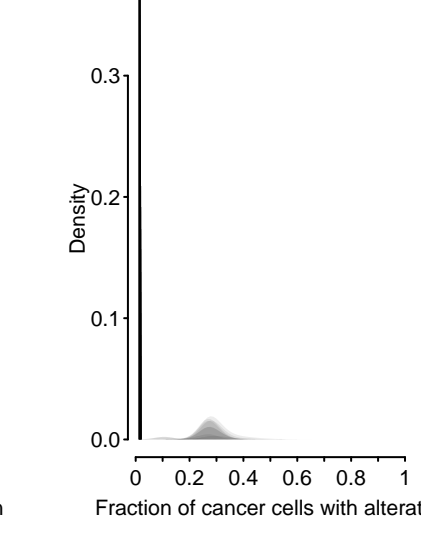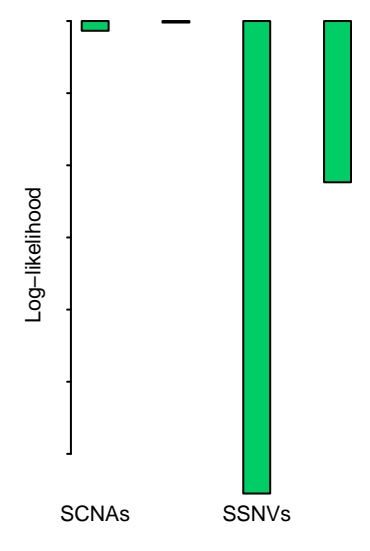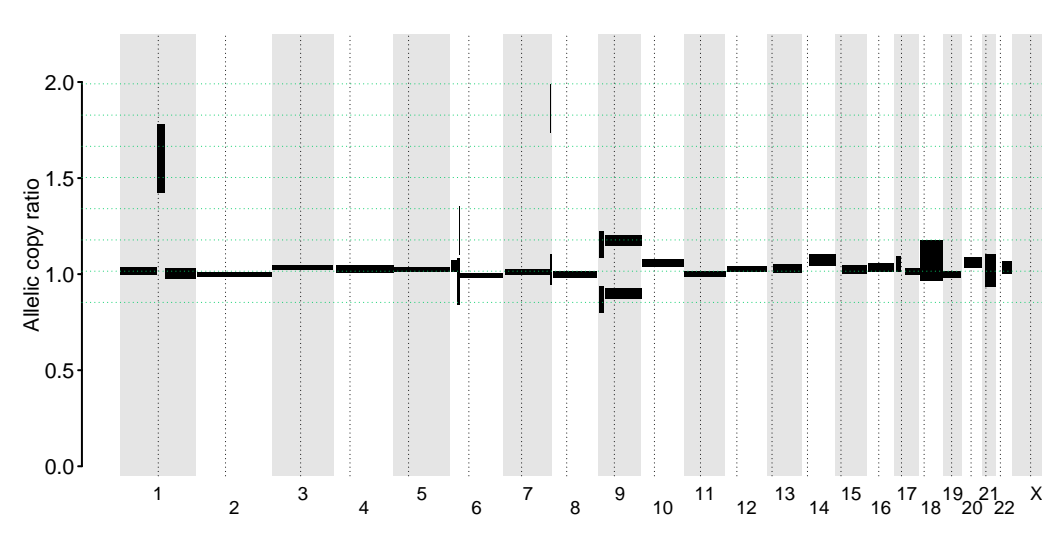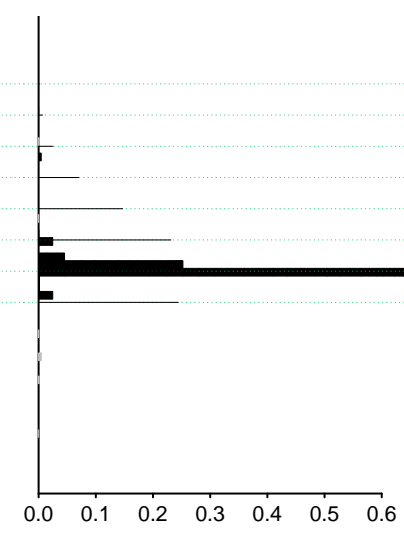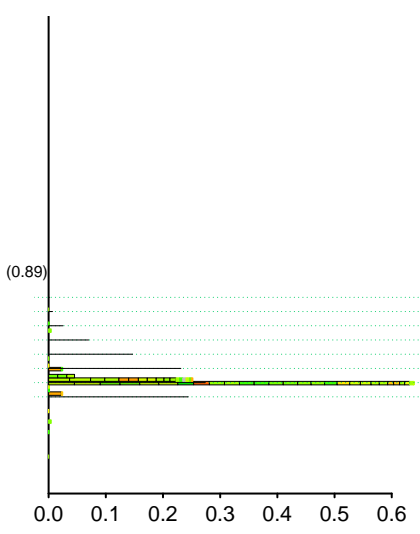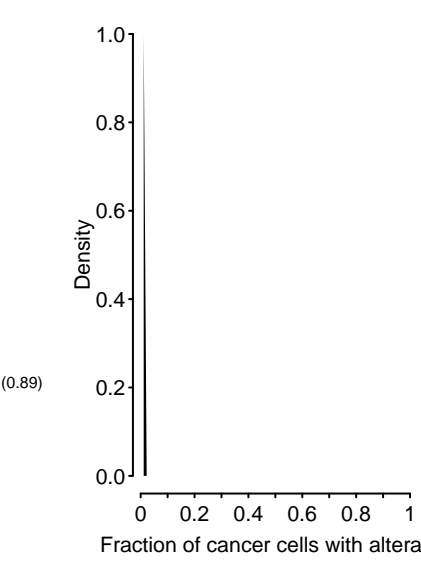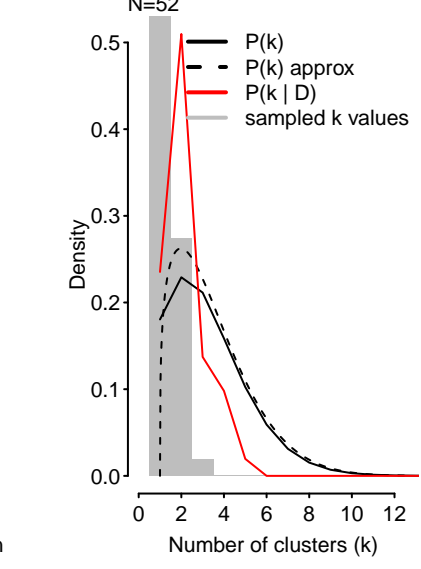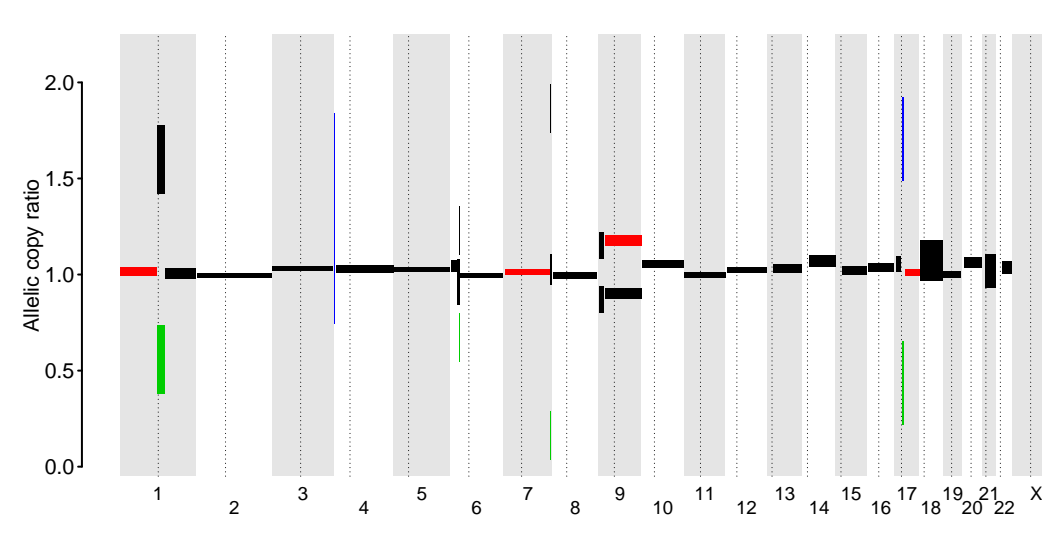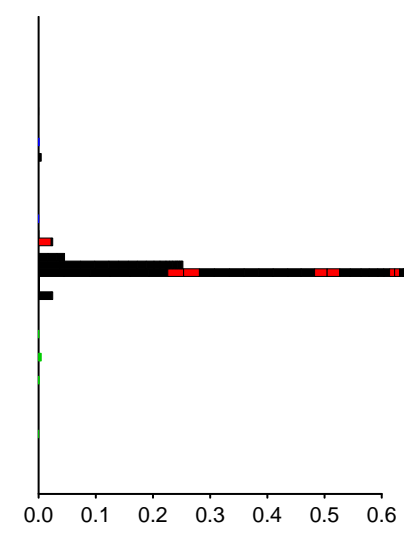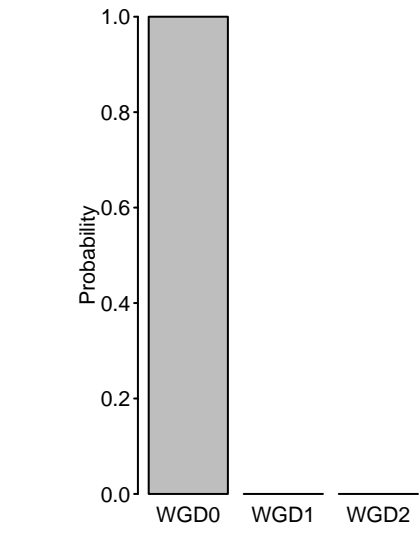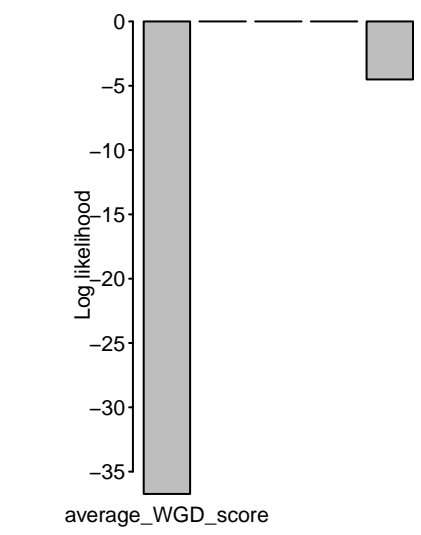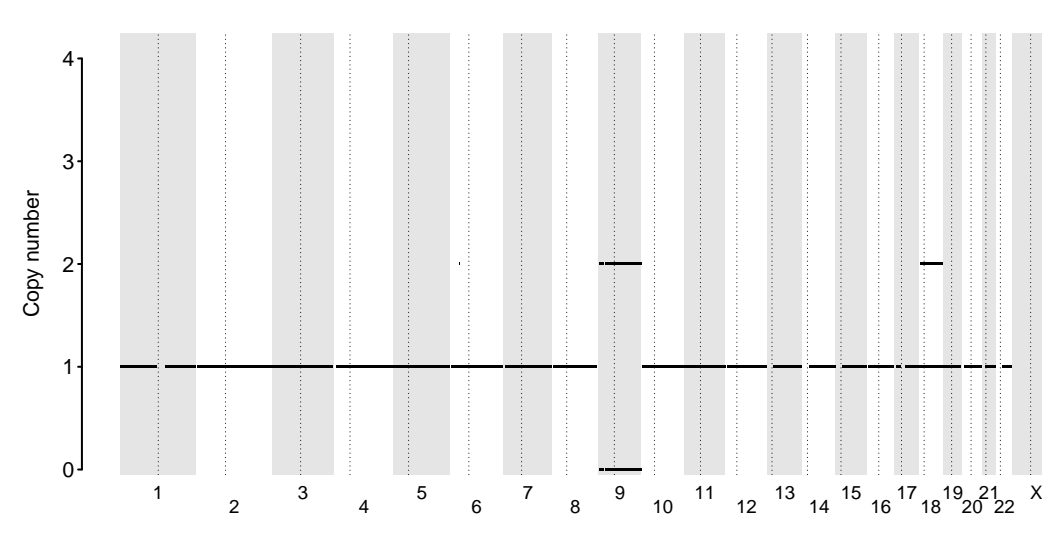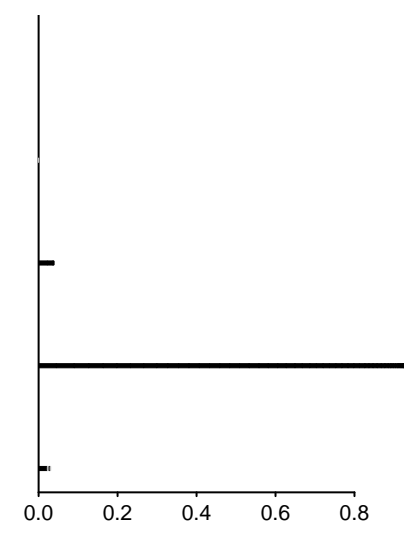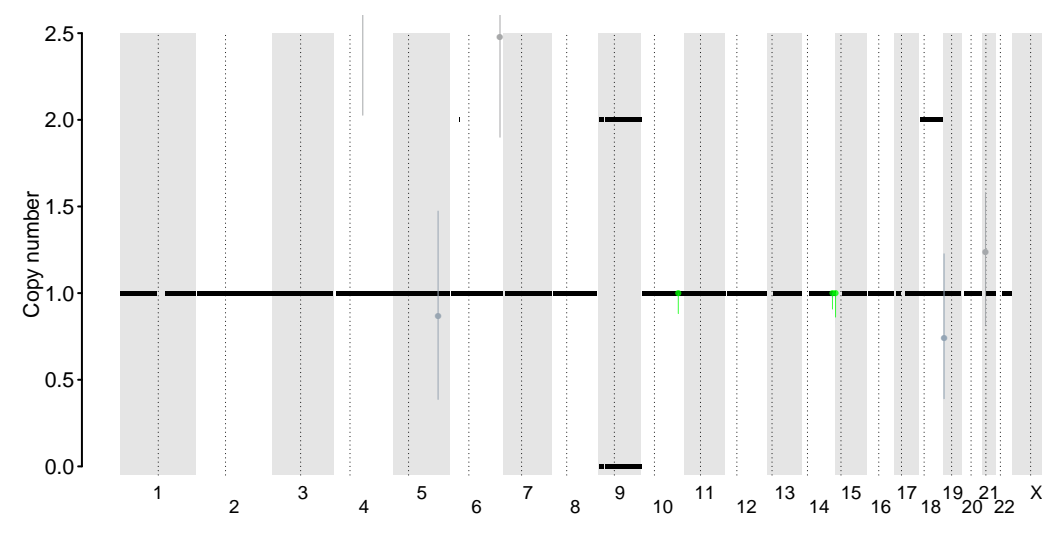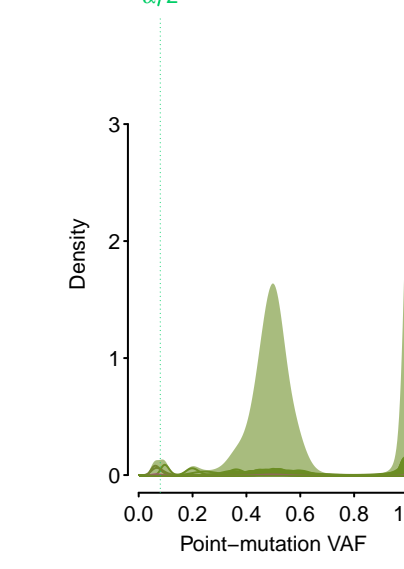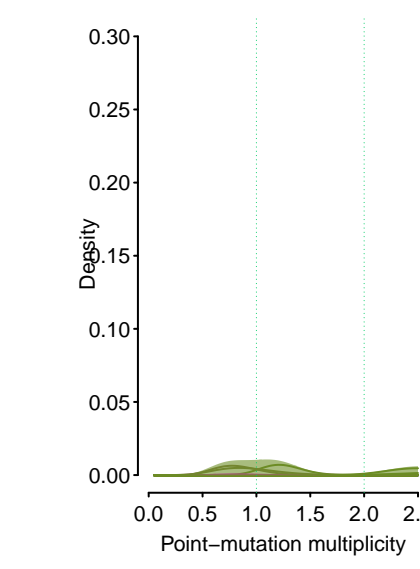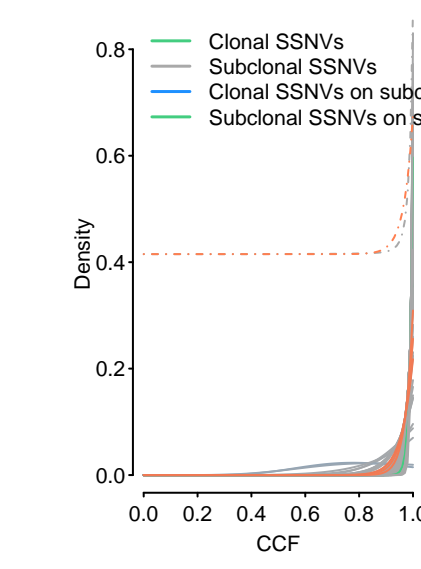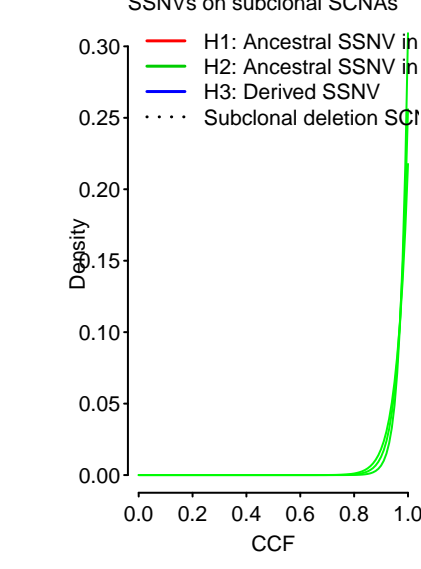

Sample 49

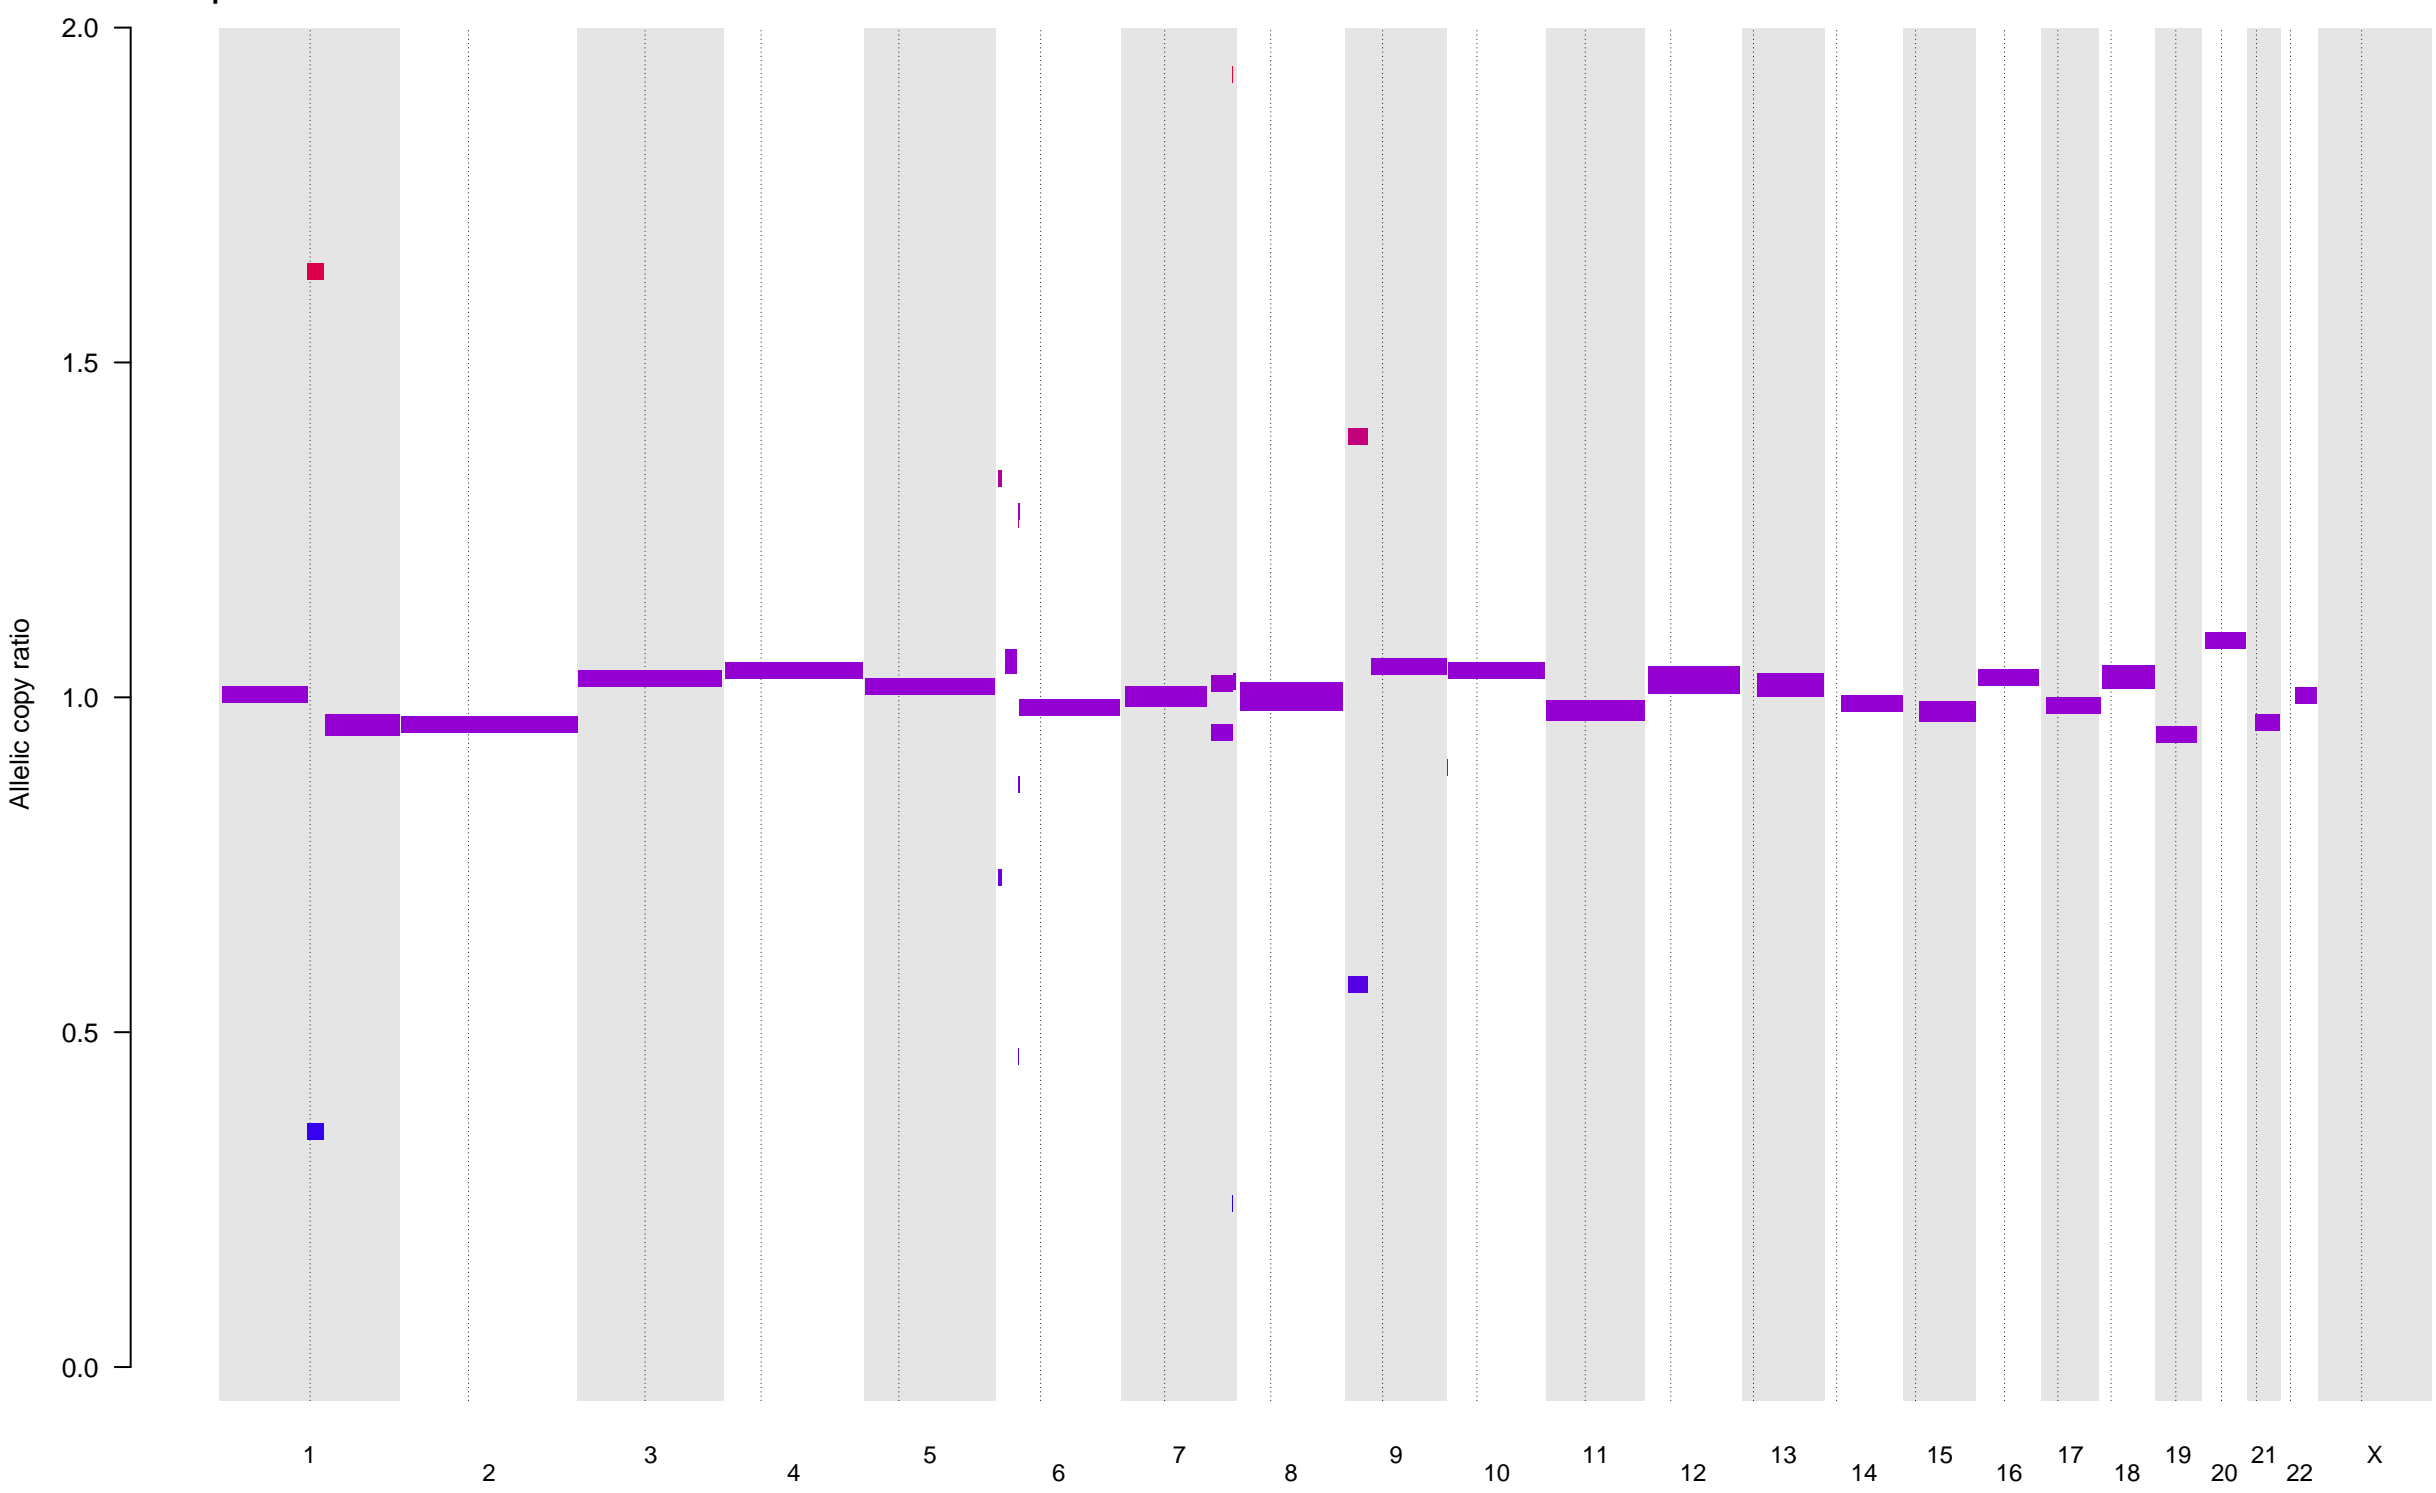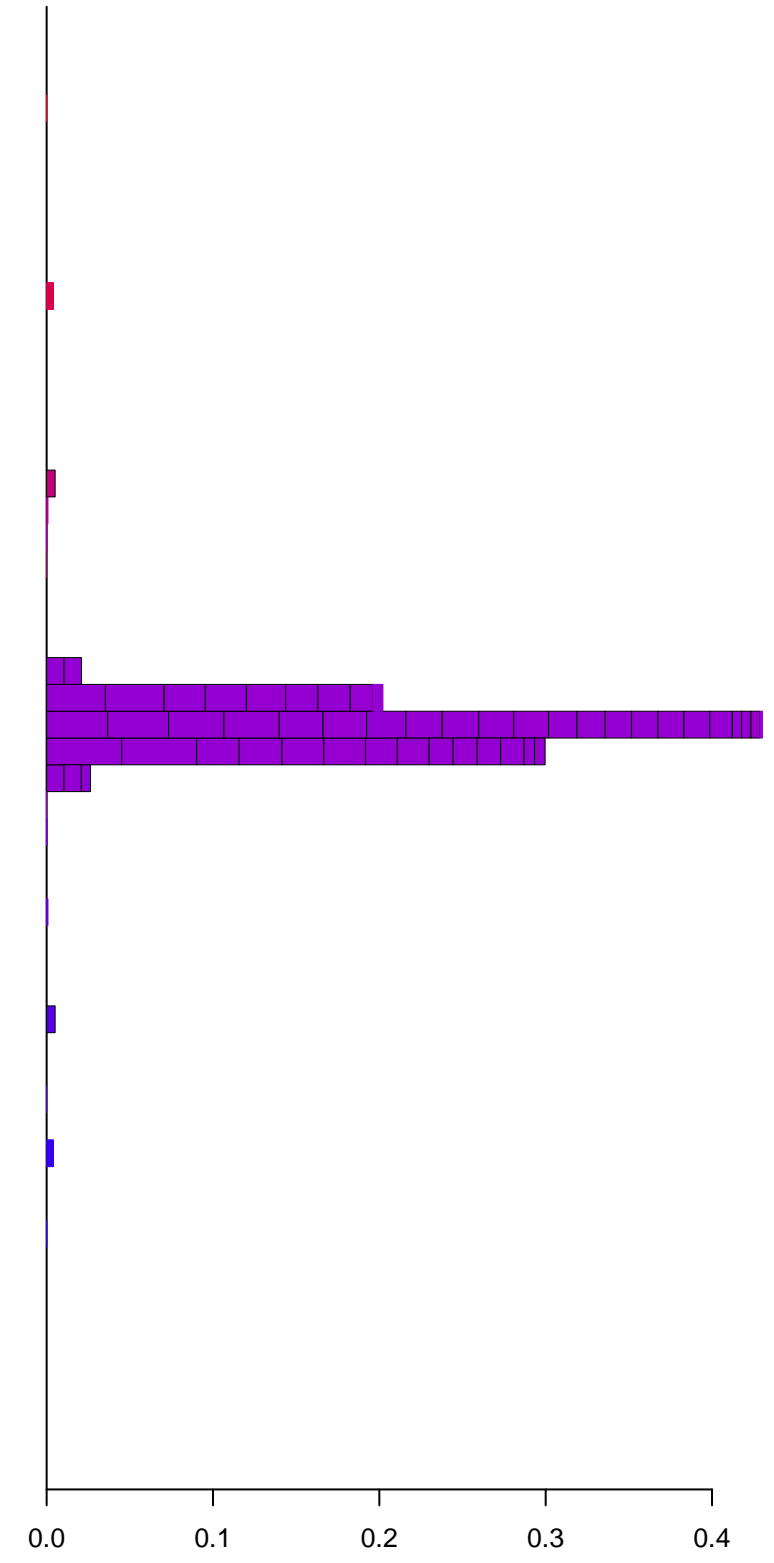

purity( $\hat{\alpha}$ ) = 0.42, ploidy:  $\hat{t} = 1.98$ ,  $\hat{t}_g = 2$   
 $\theta_z = 0.11$ ,  $\theta_a = 1.276$ , WGD=0  
 SCNA LL = -221.7, SSNV LL = -5262.3, SCNA Ev = -84.63829

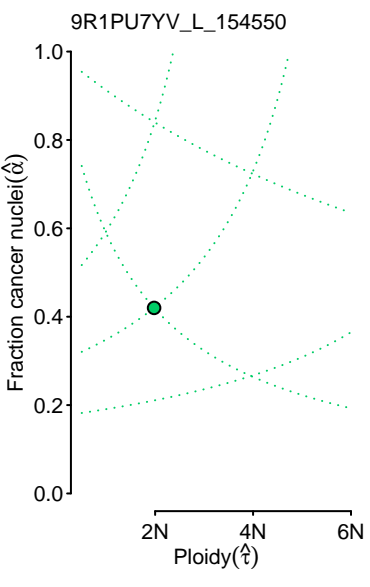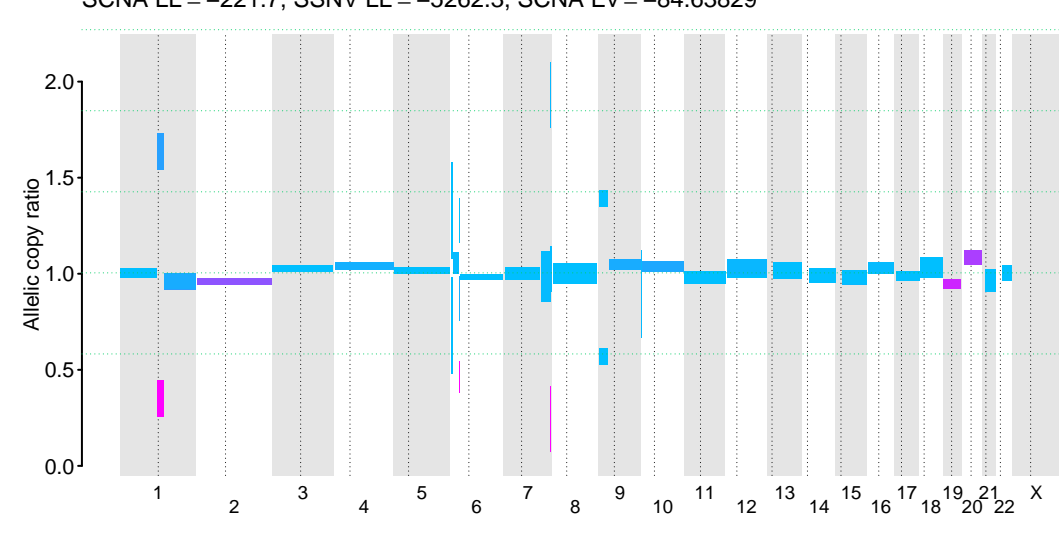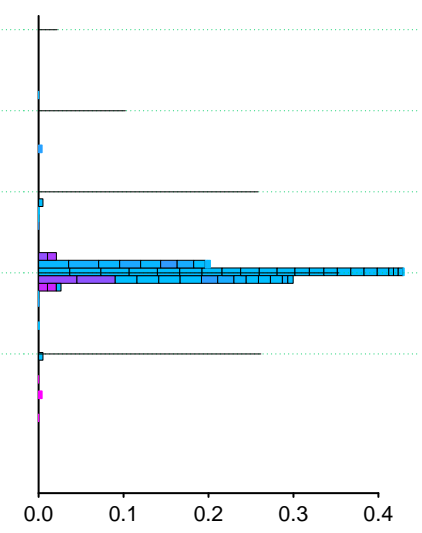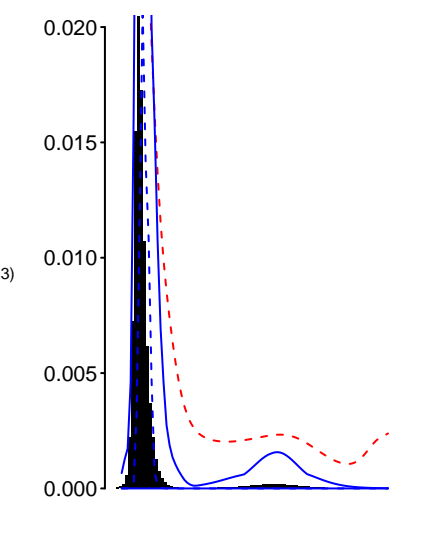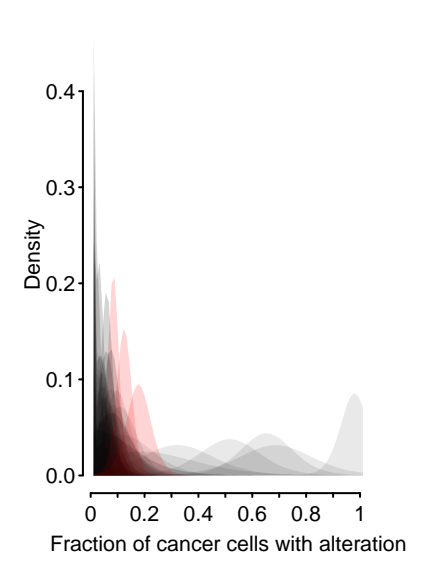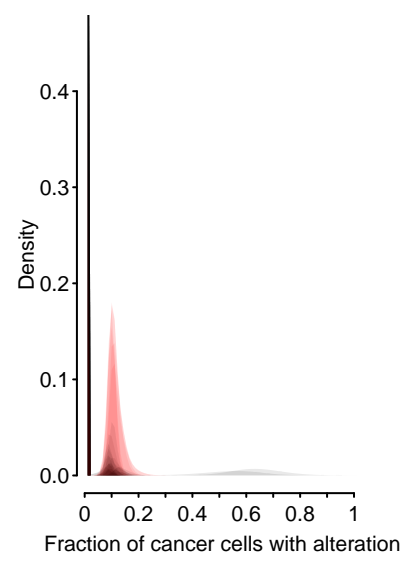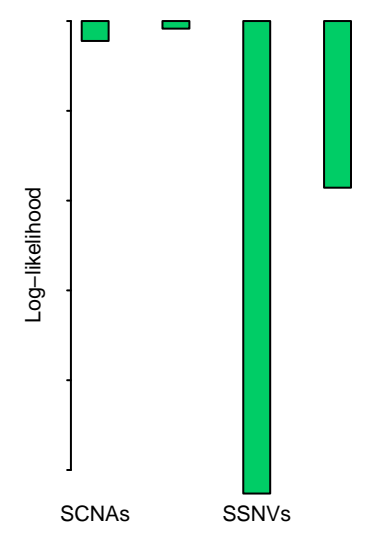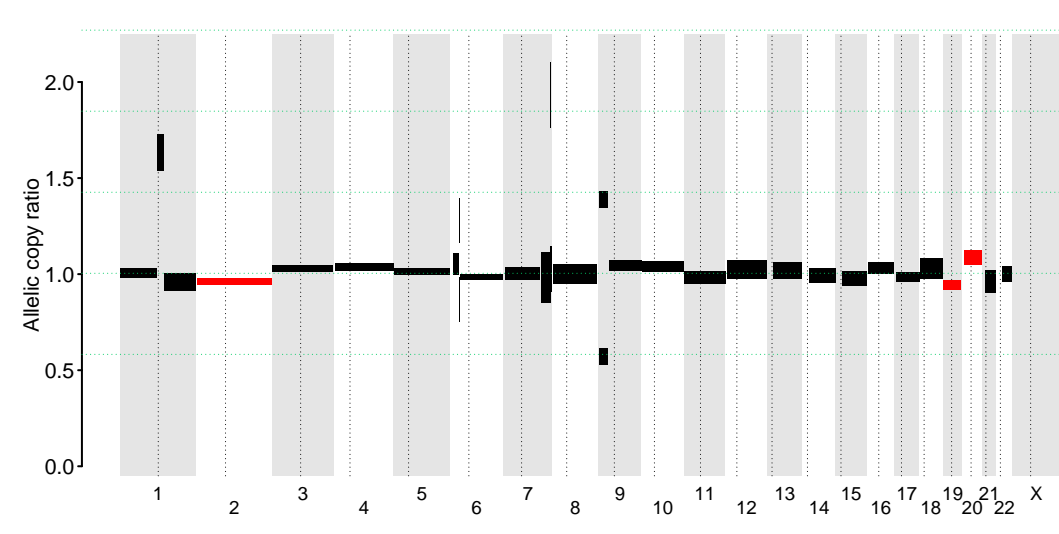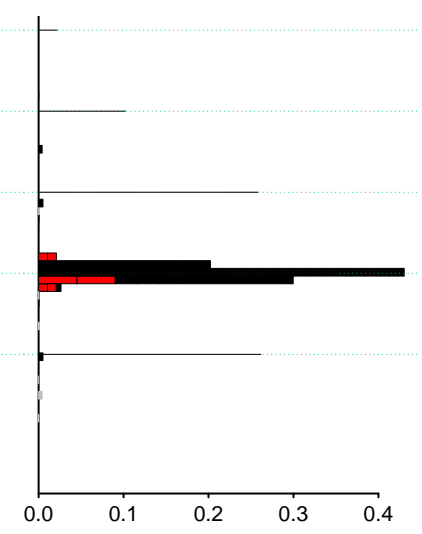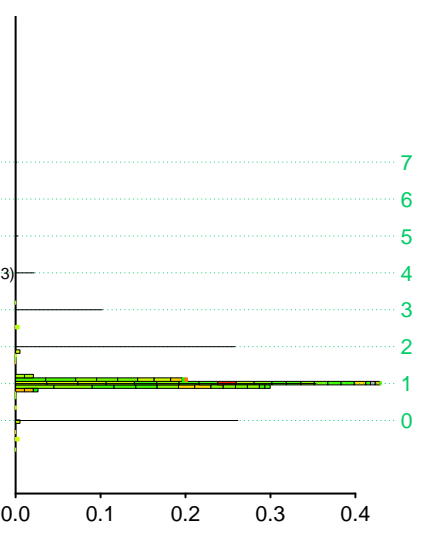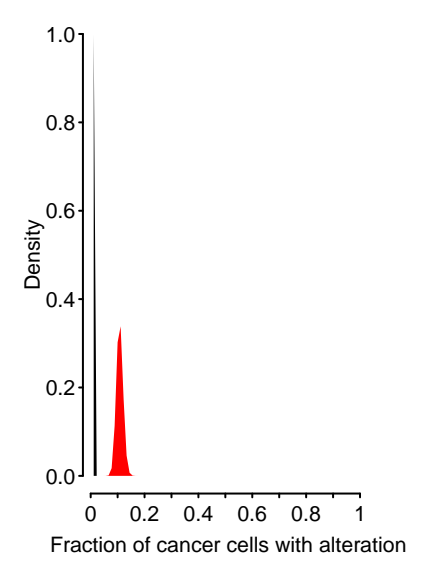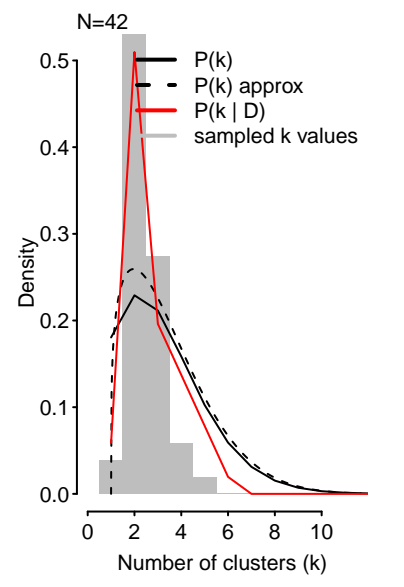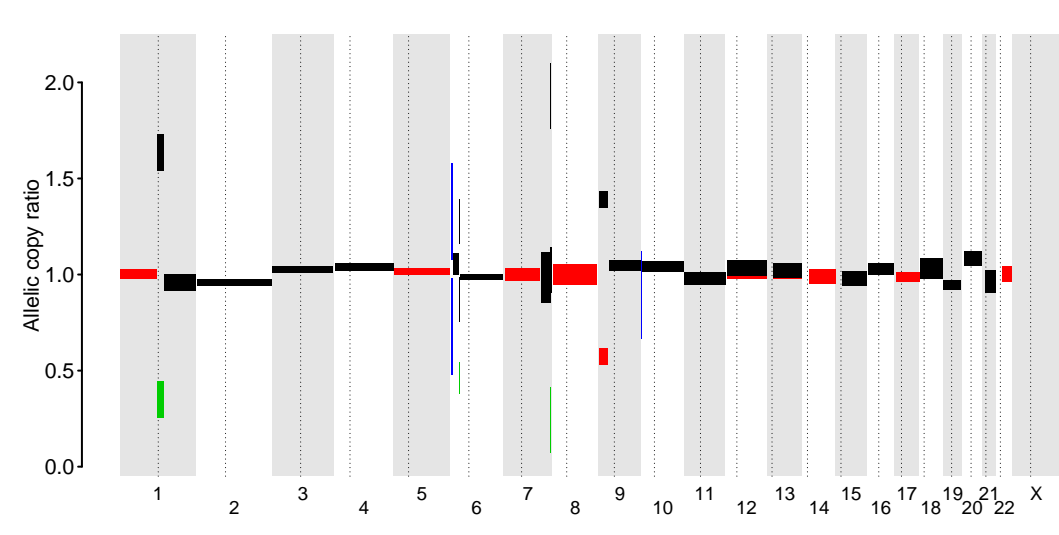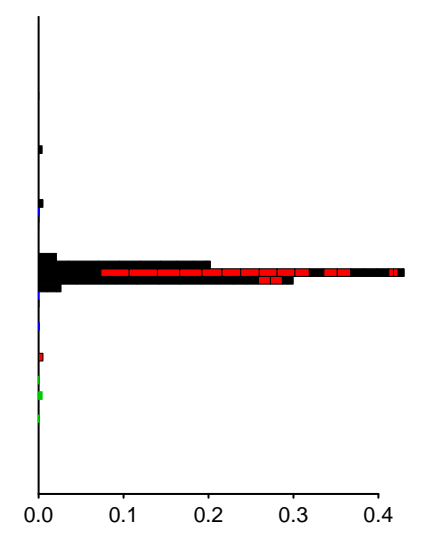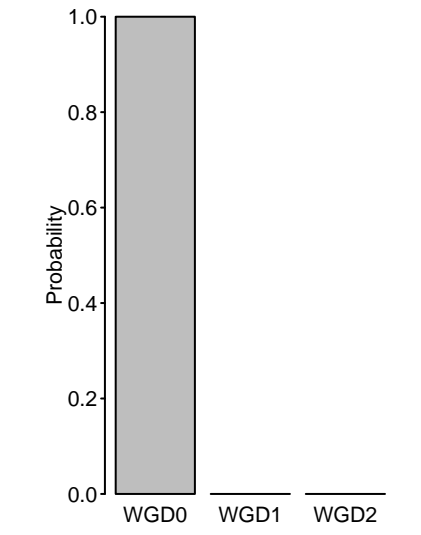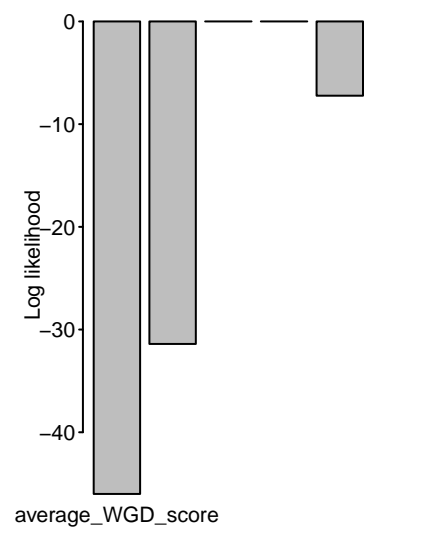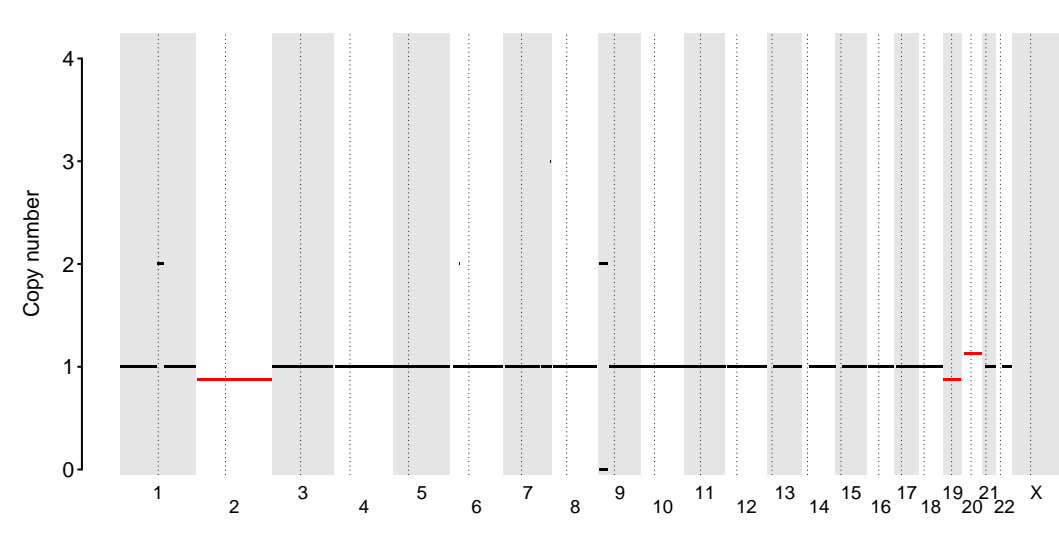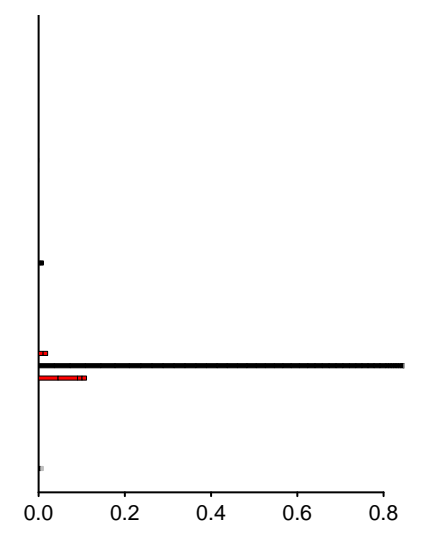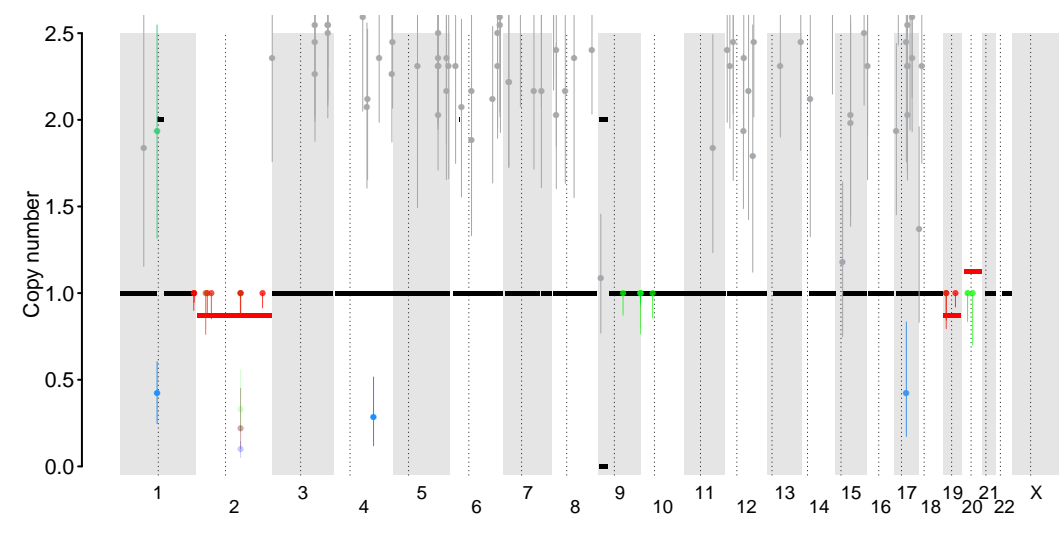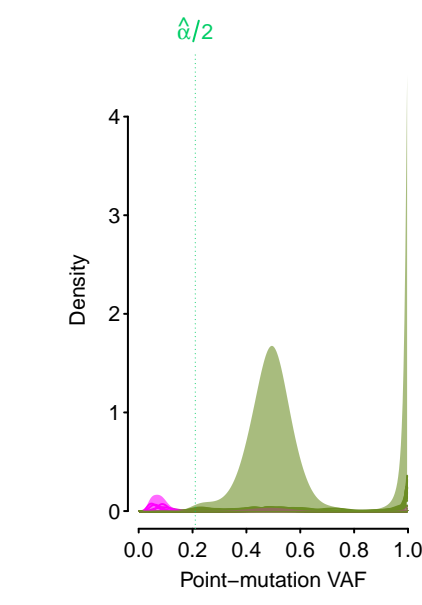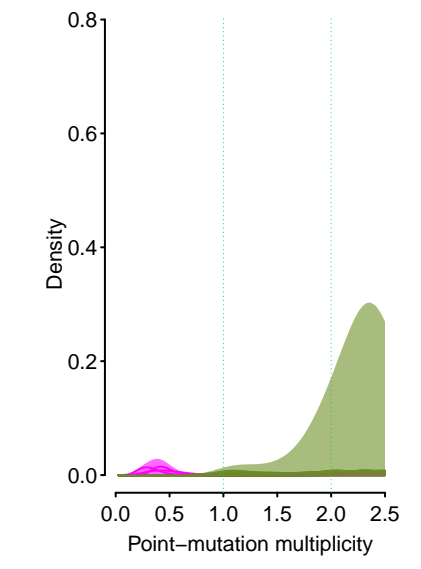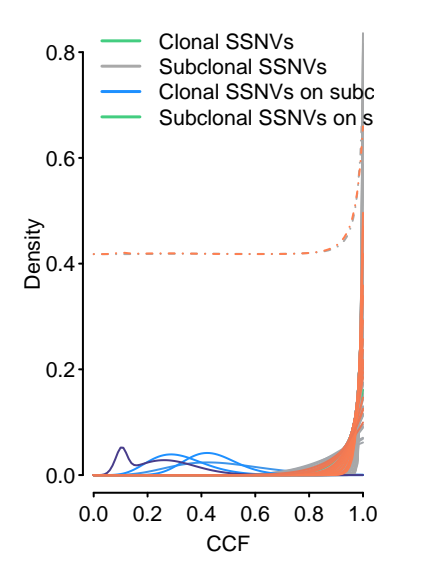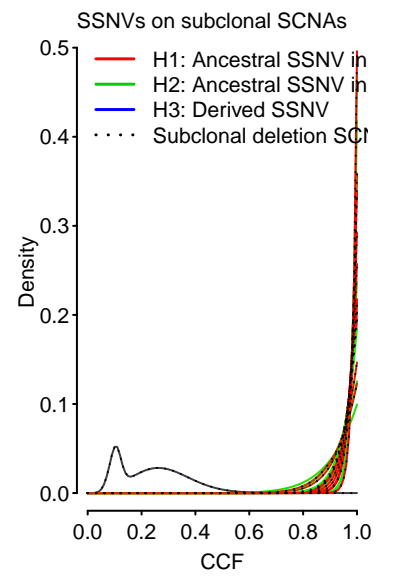



Sample 50

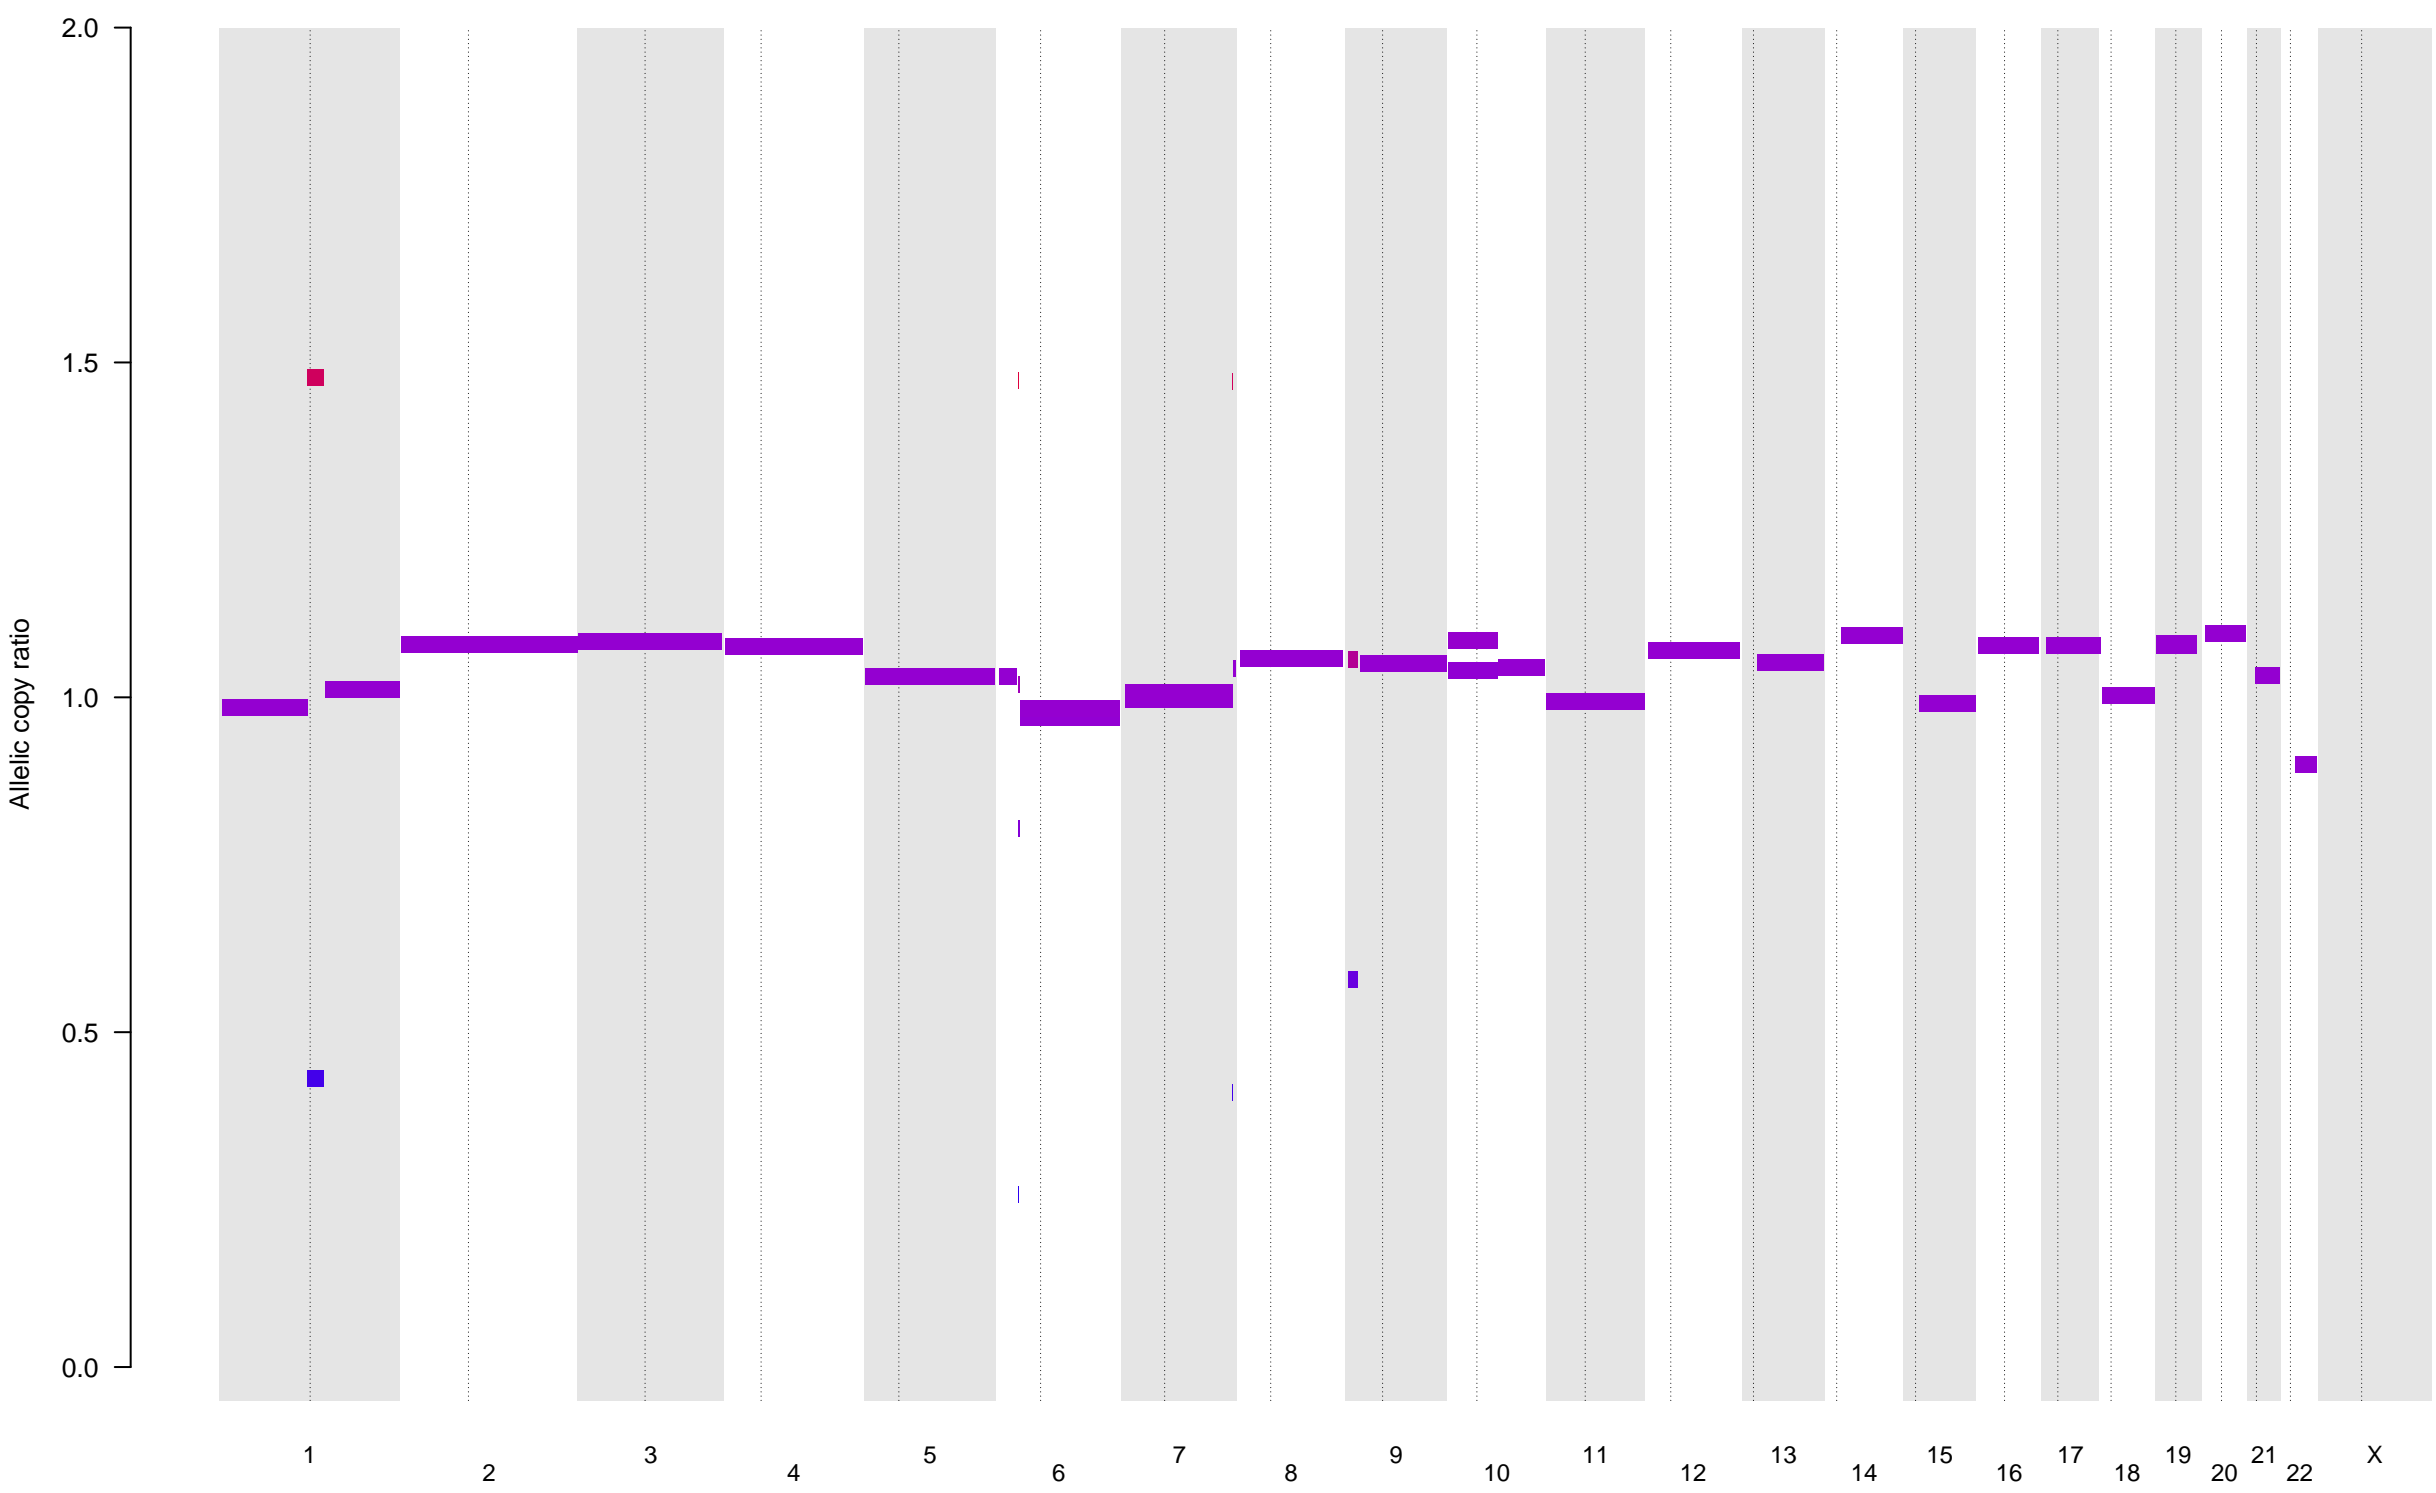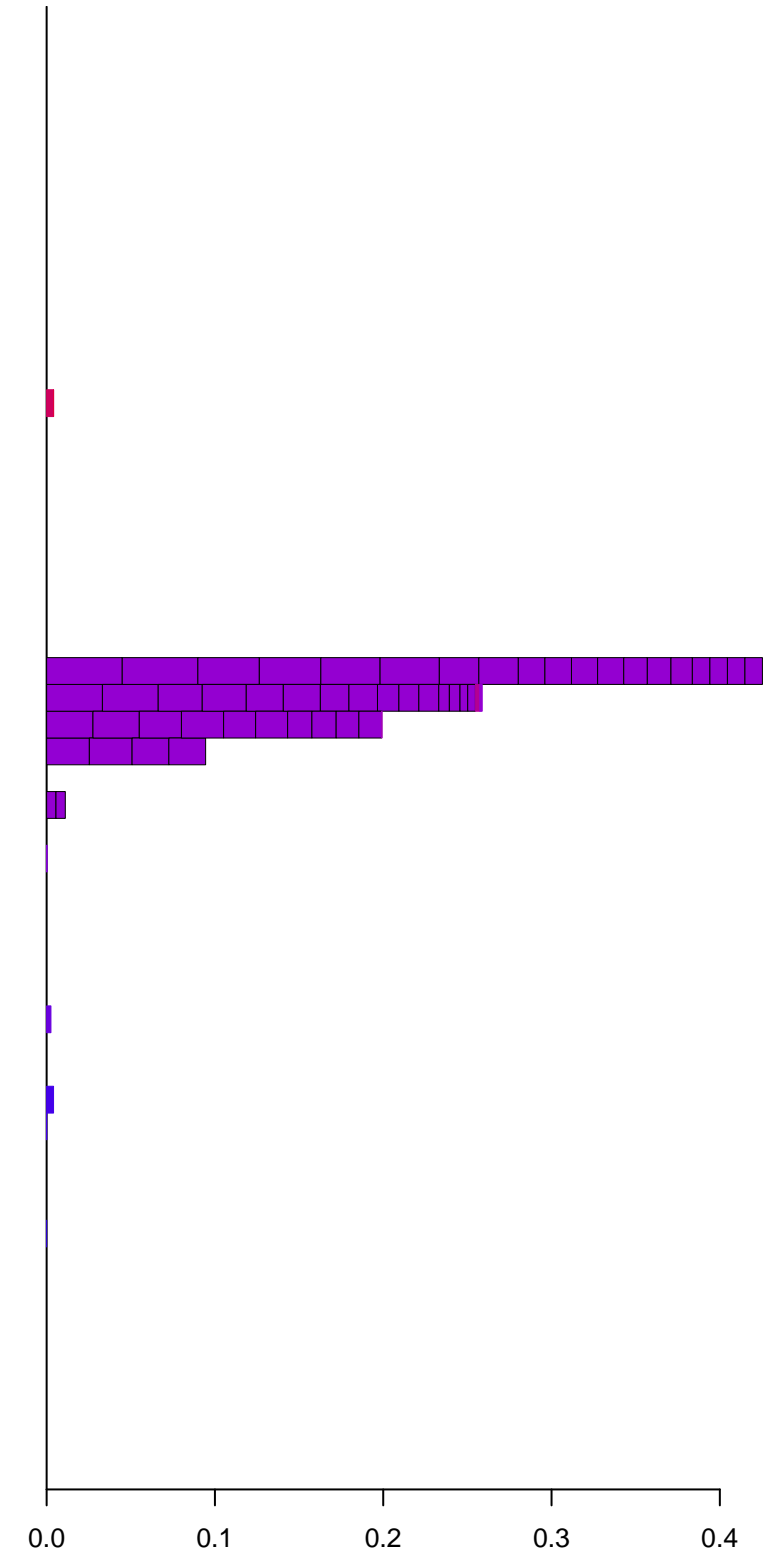

purity( $\hat{\alpha}$ ) = 0.46, ploidy:  $\hat{\tau} = 1.82$ ,  $\hat{\tau}_g = 1.99$   
 $\theta_z = 0$ ,  $\theta_0 = 1.189$ , WGD=0  
 SCNA LL = -190.33, SSNV LL = -4487.19, SCNA Ev = -29.60161

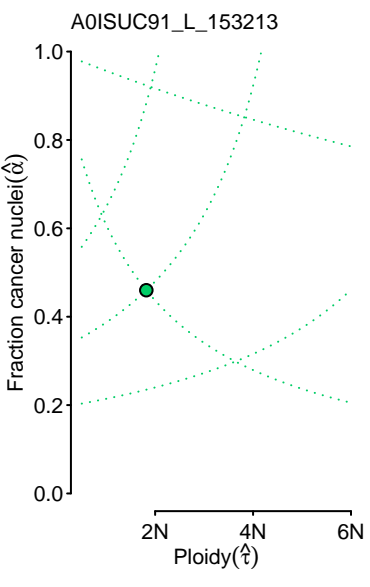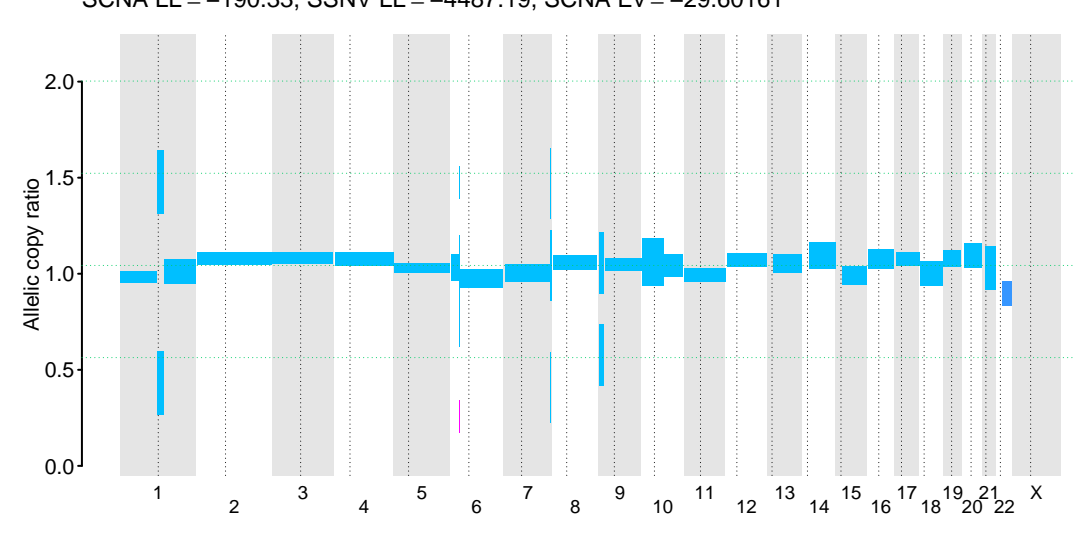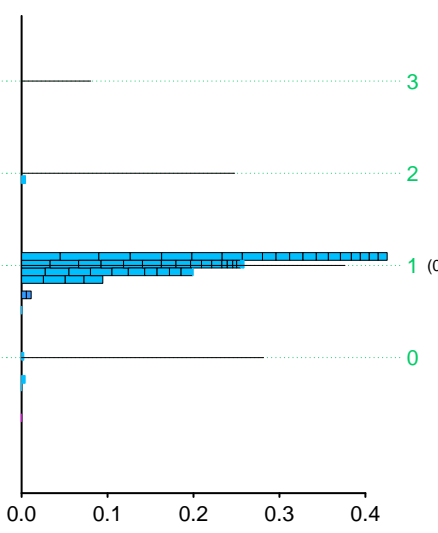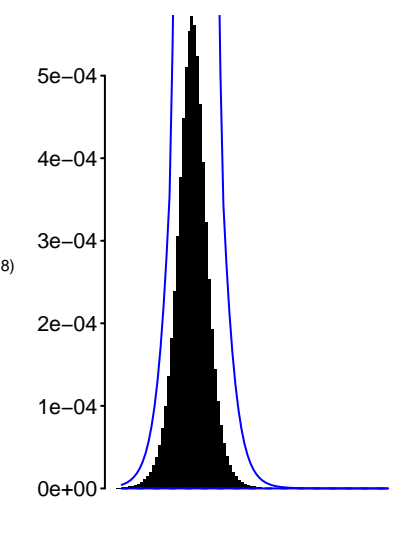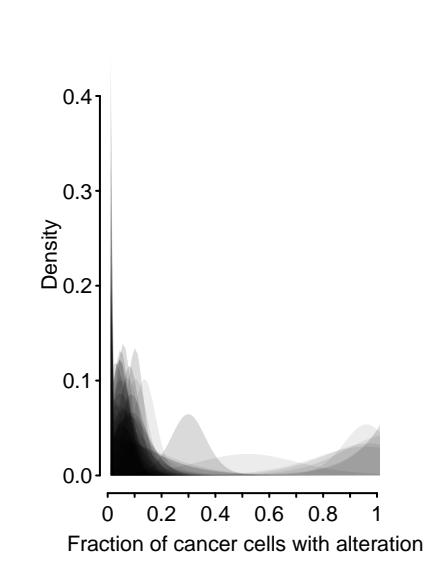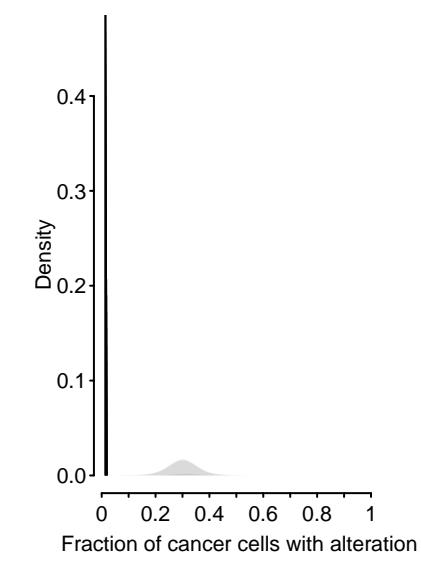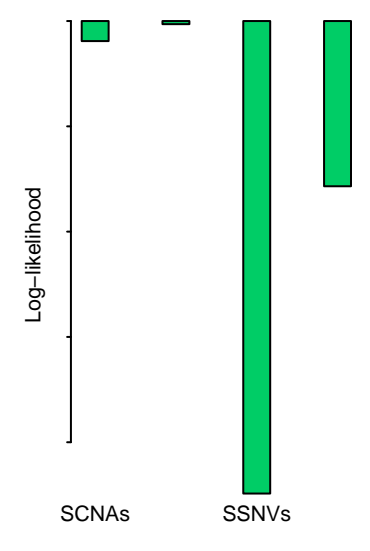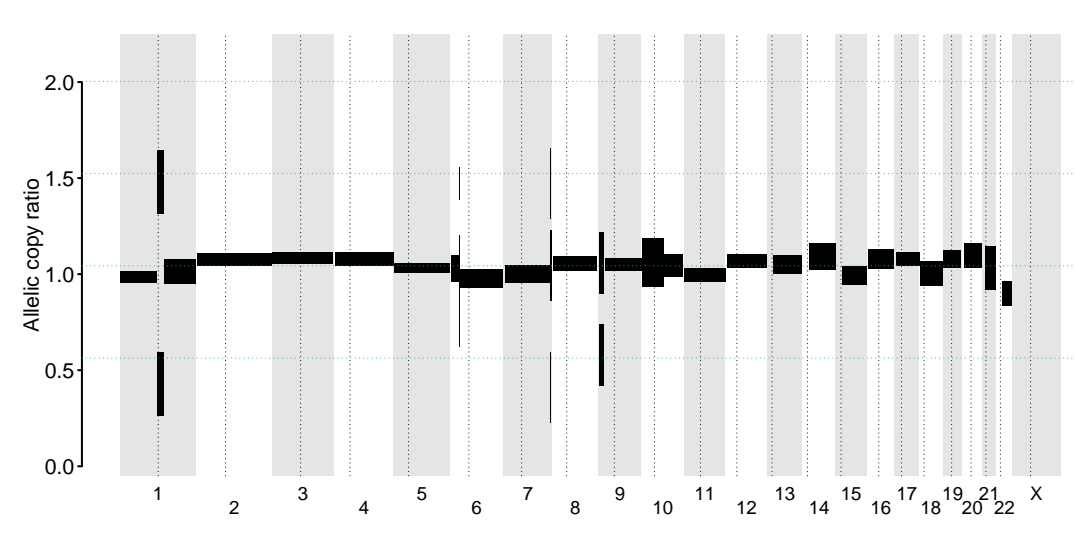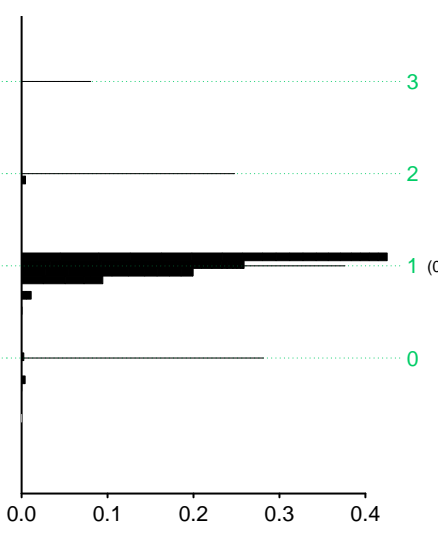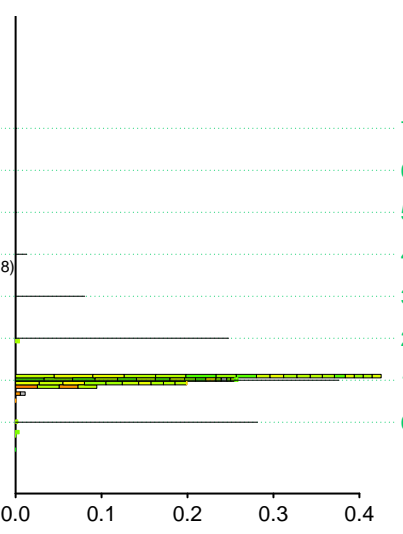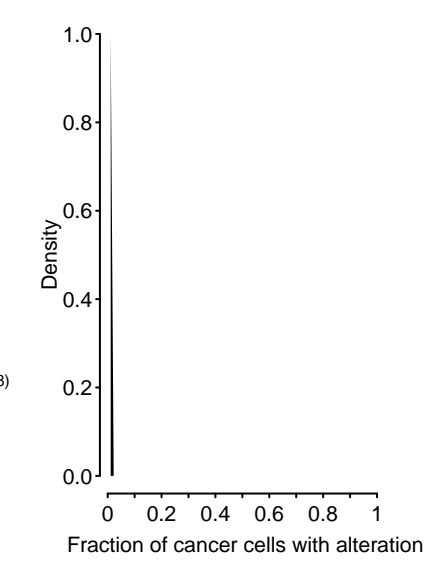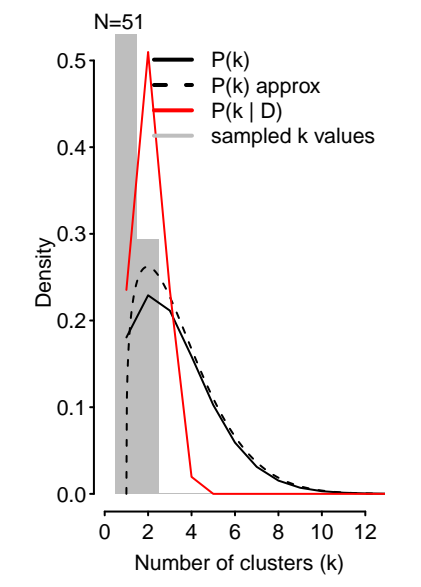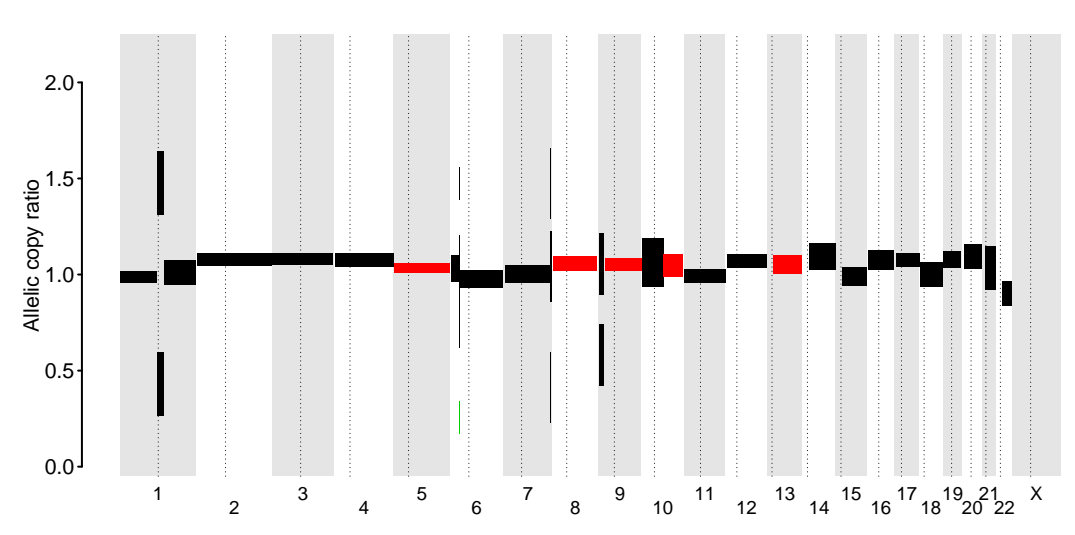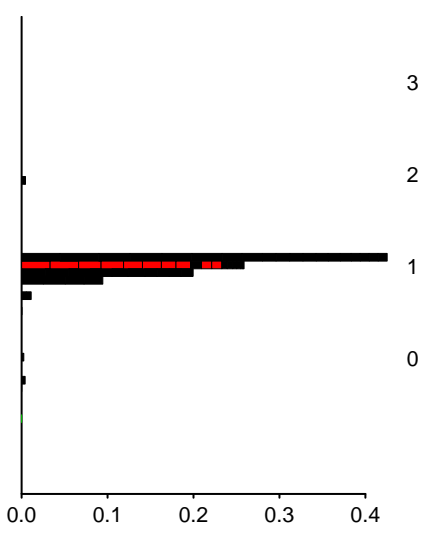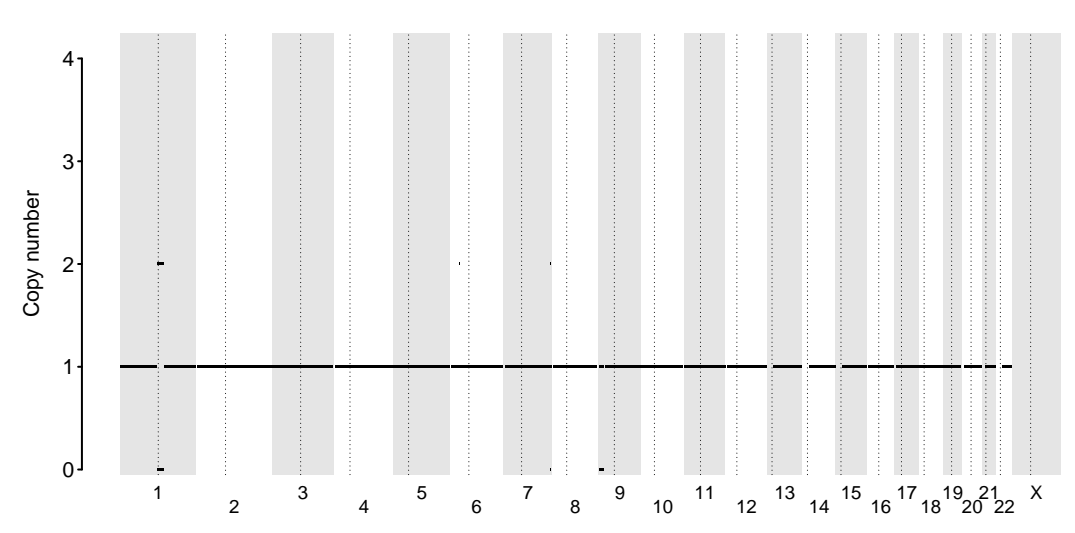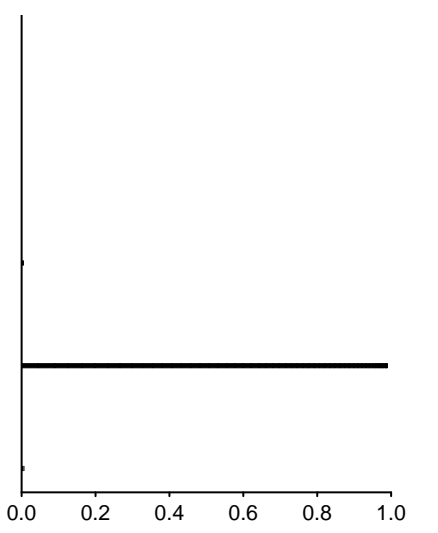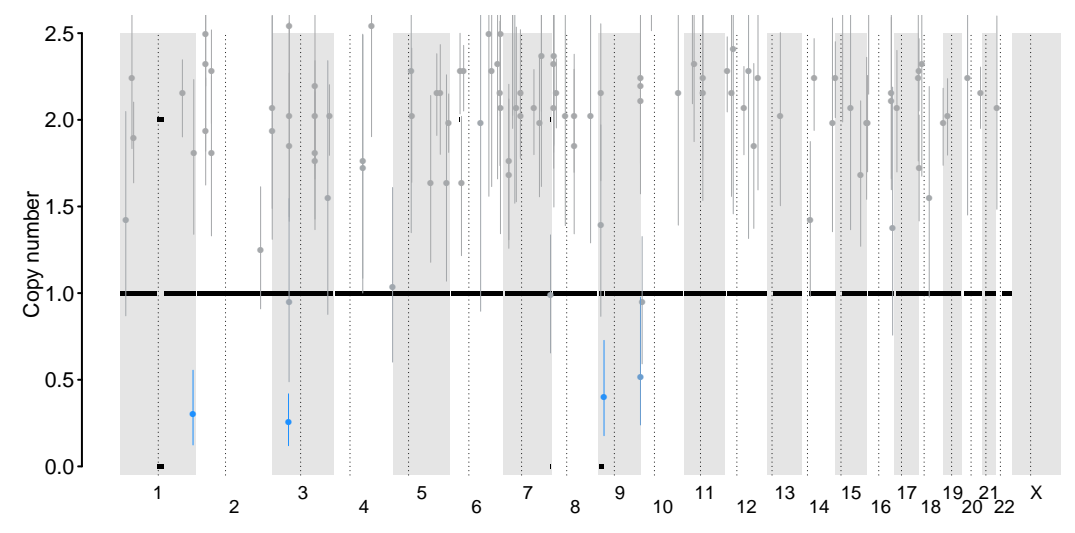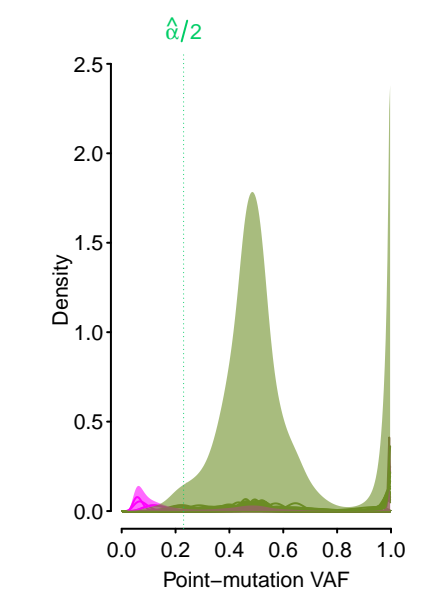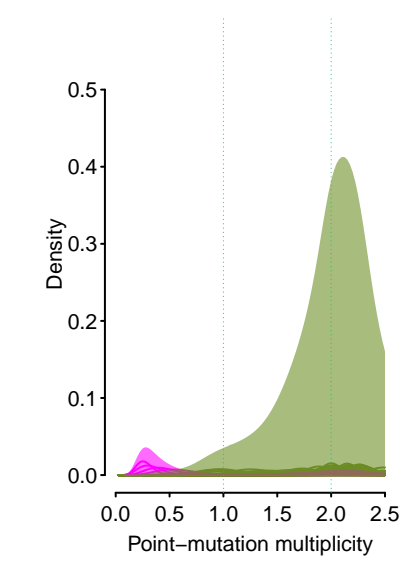

Sample 51

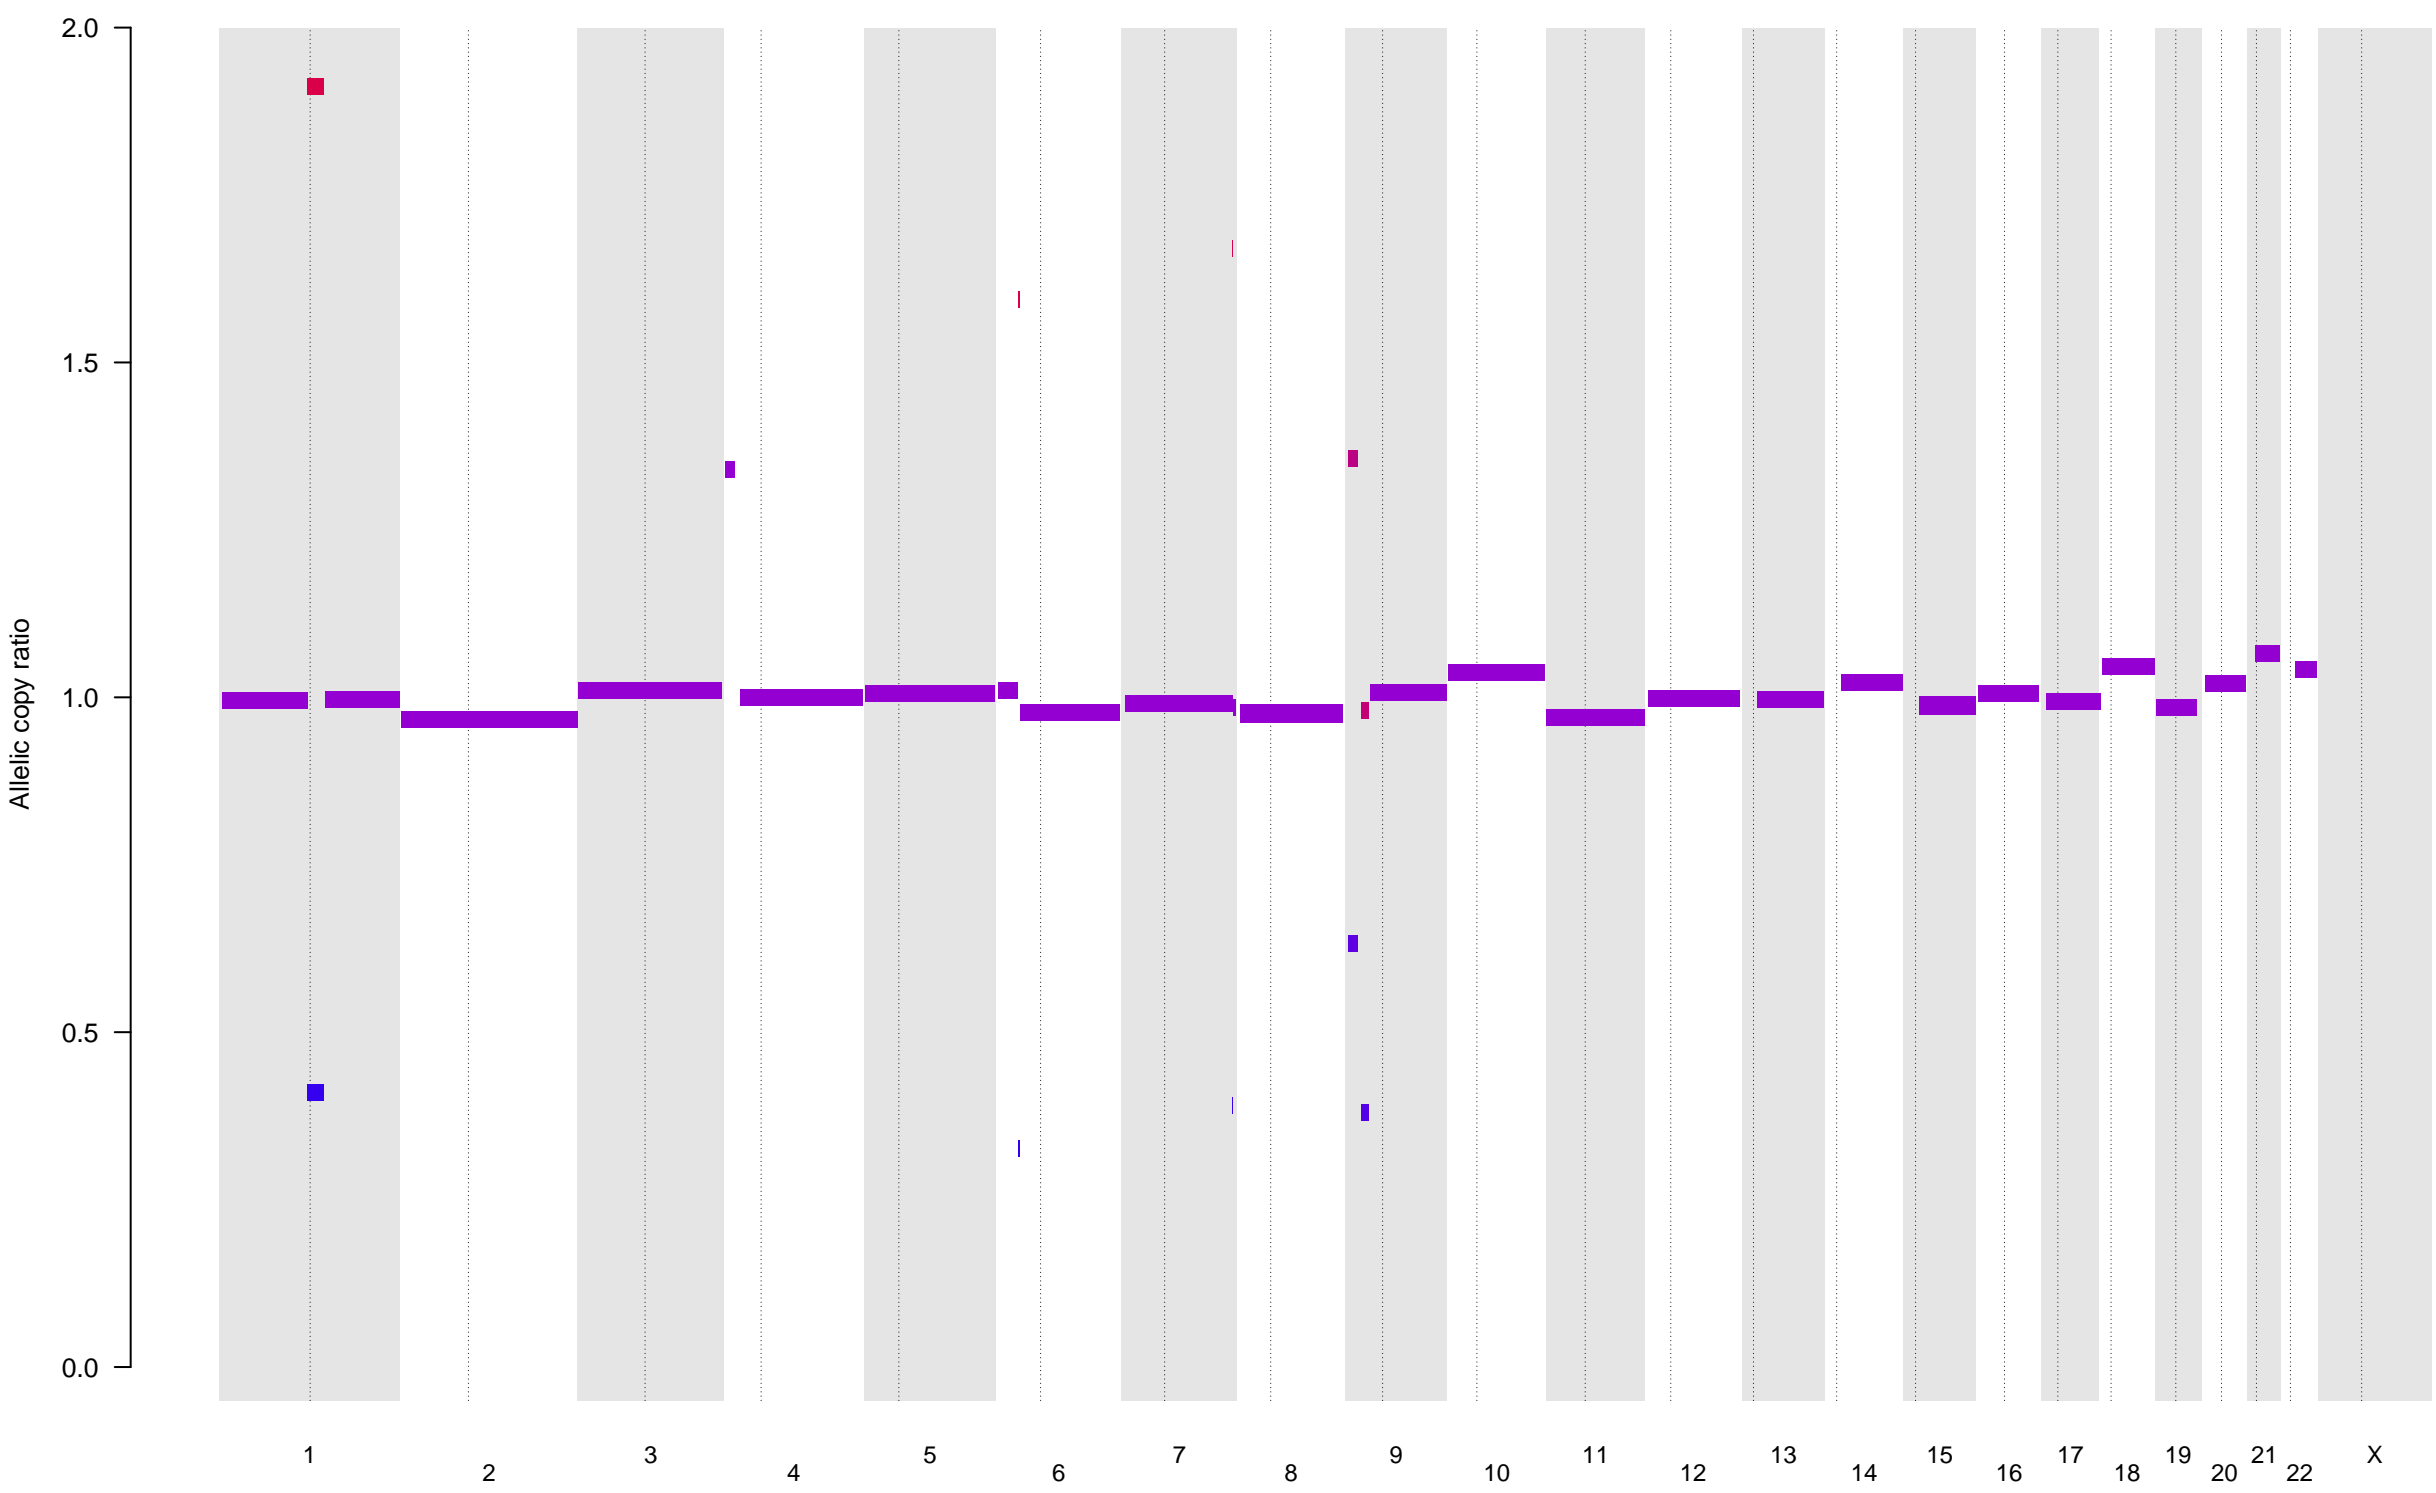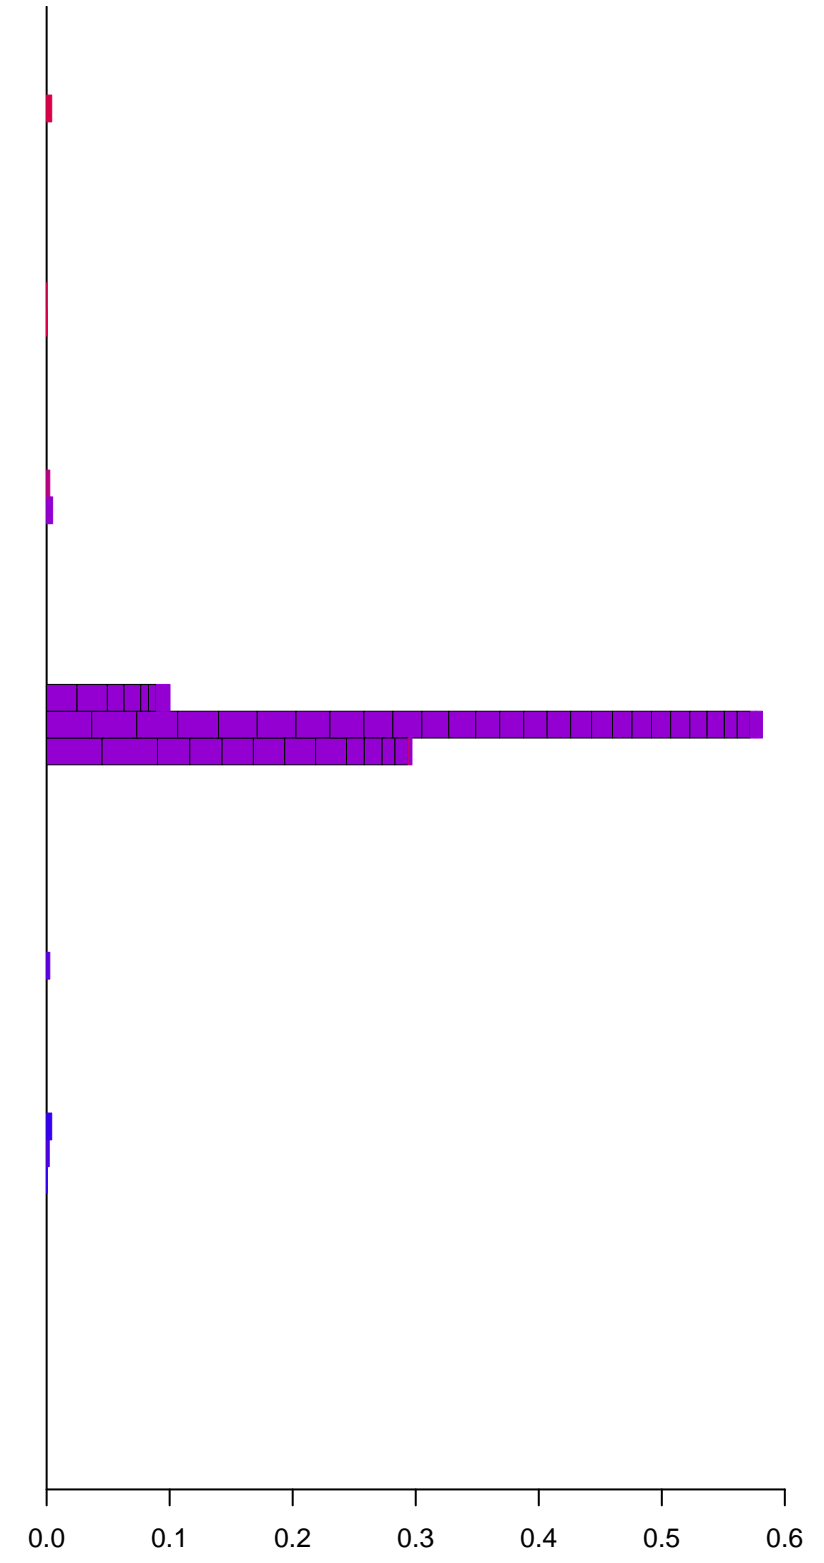

$\hat{\alpha} = 0.63$ , purity:  $\hat{p} = 2.01$ ,  $\hat{t}_g = 2.01$   
 $\theta_z = 0.01$ ,  $\theta_Q = 1.223$ , WGD=0  
 SCNA LL = -145.01, SSNV LL = -5087.76, SCNA Ev = -31.91525

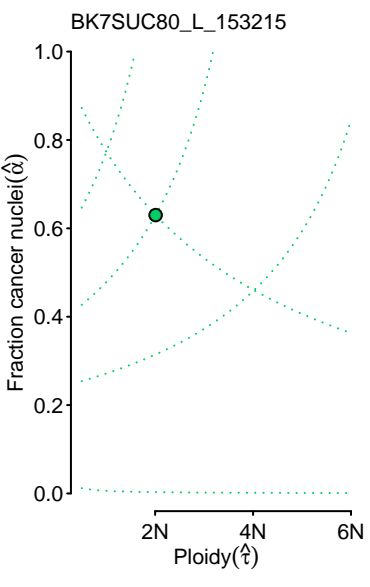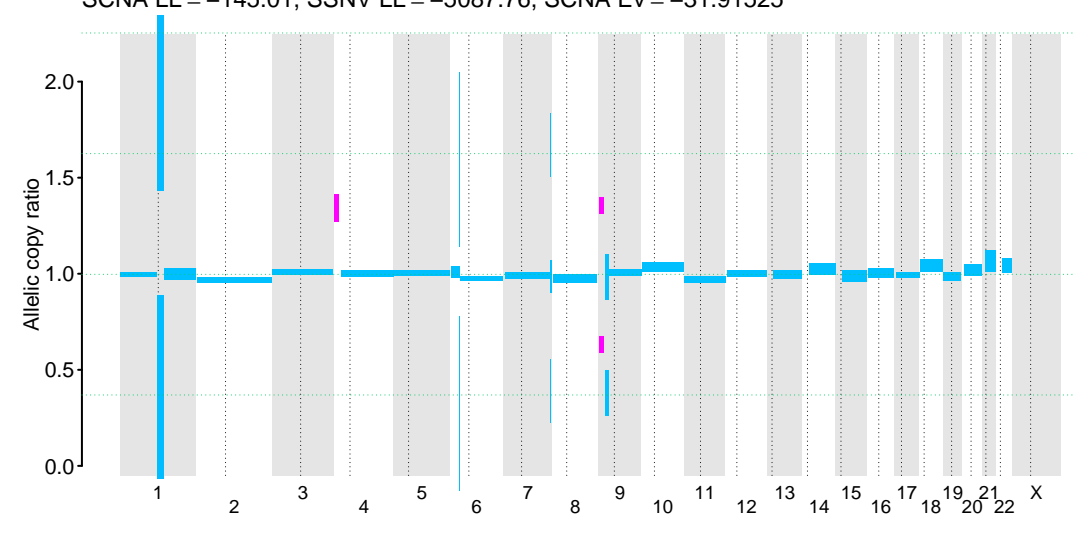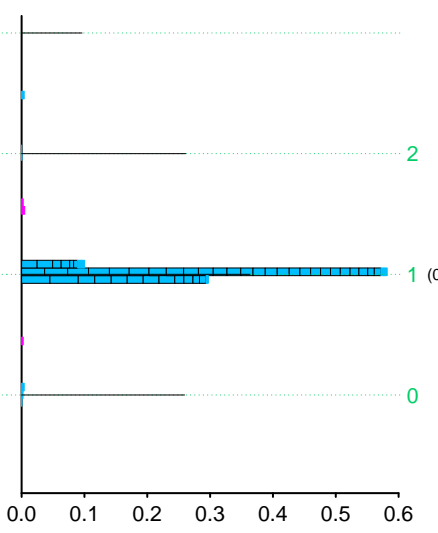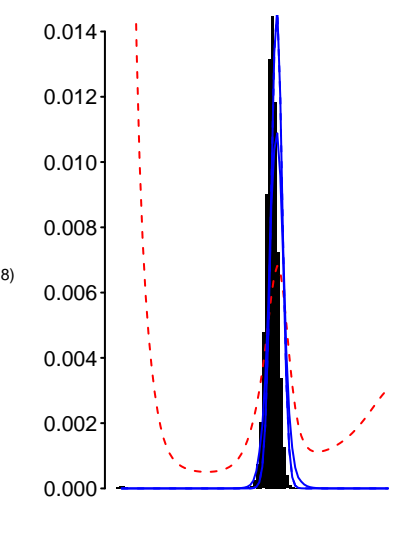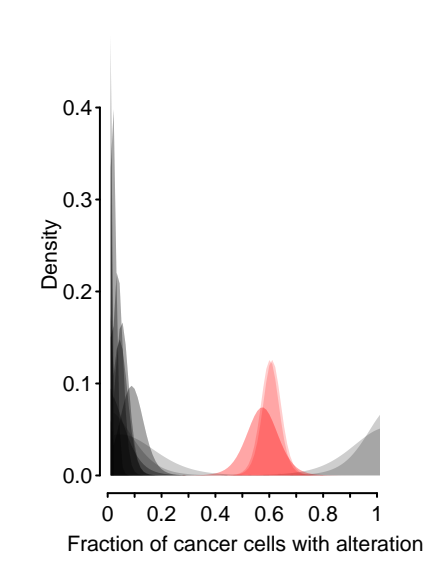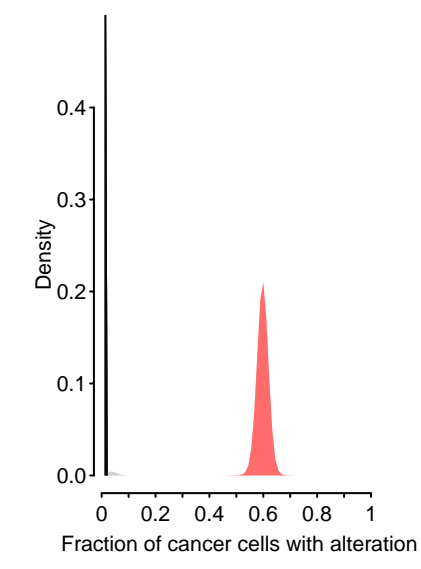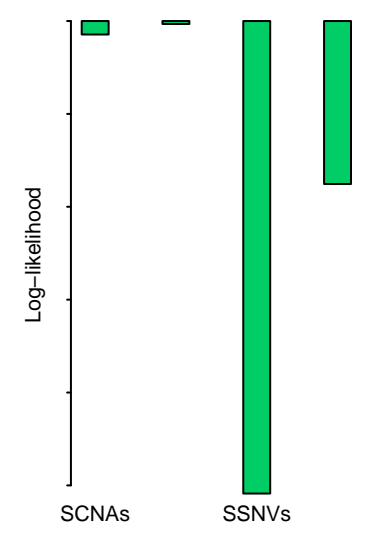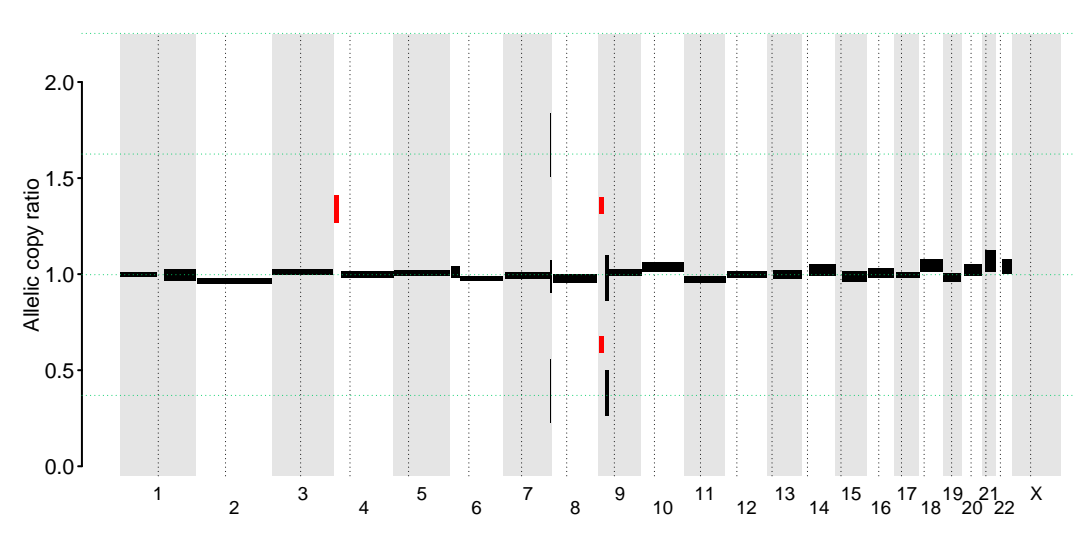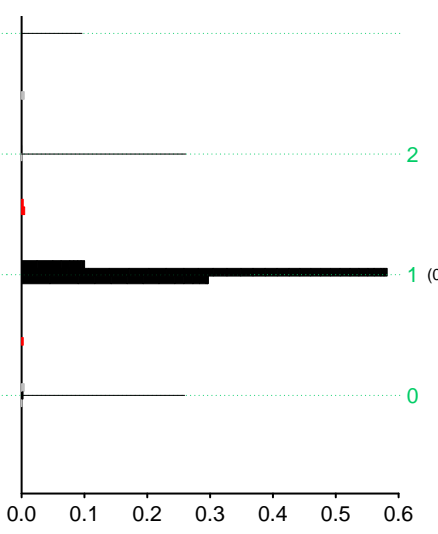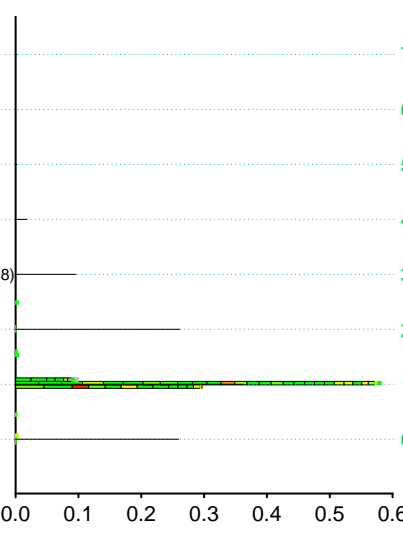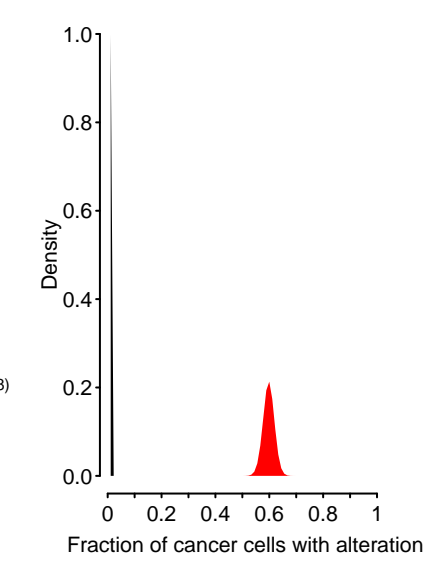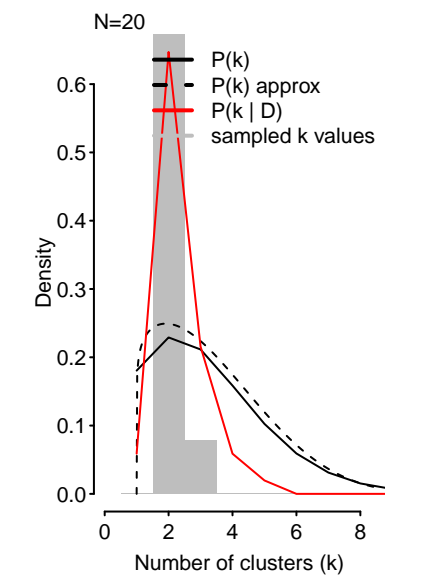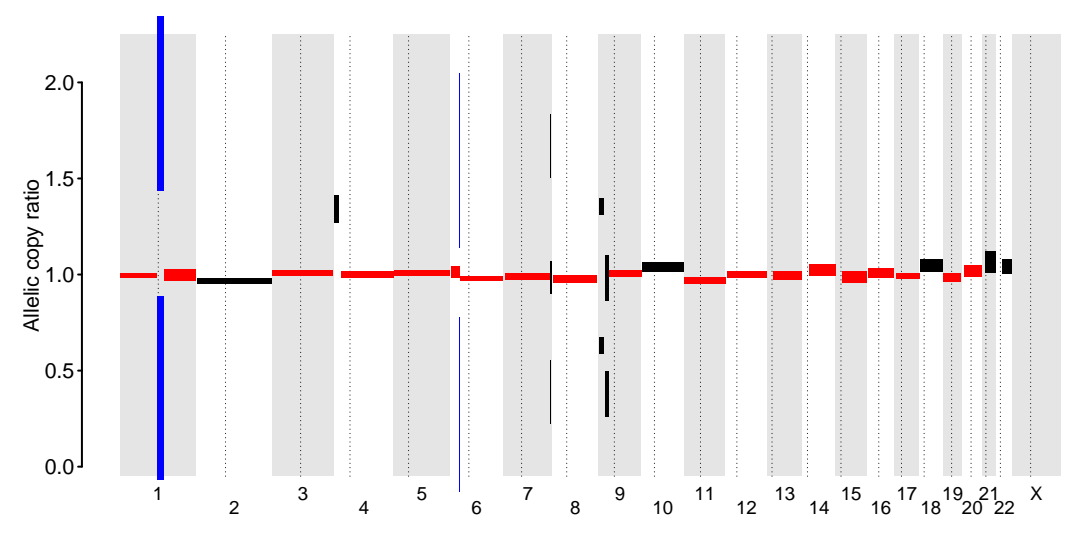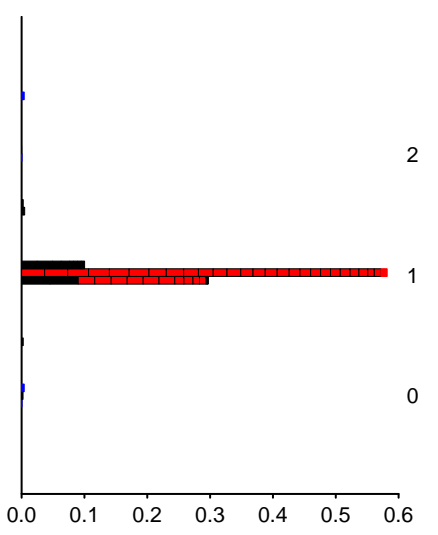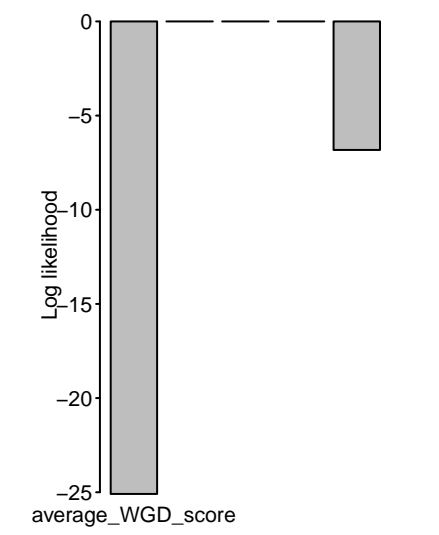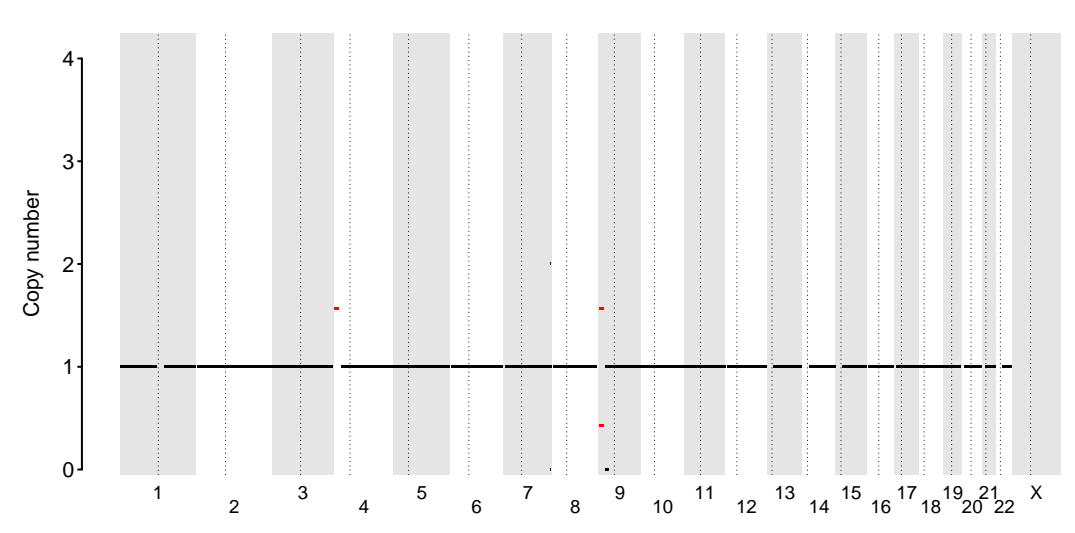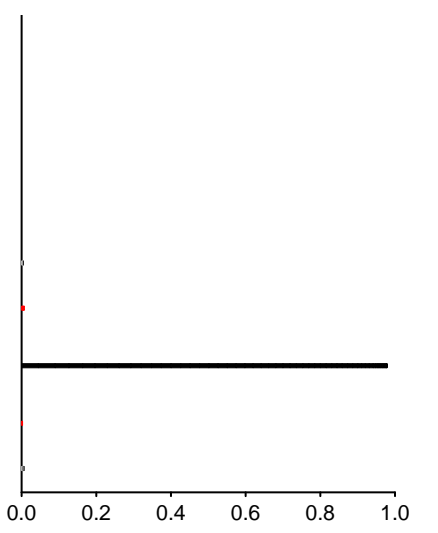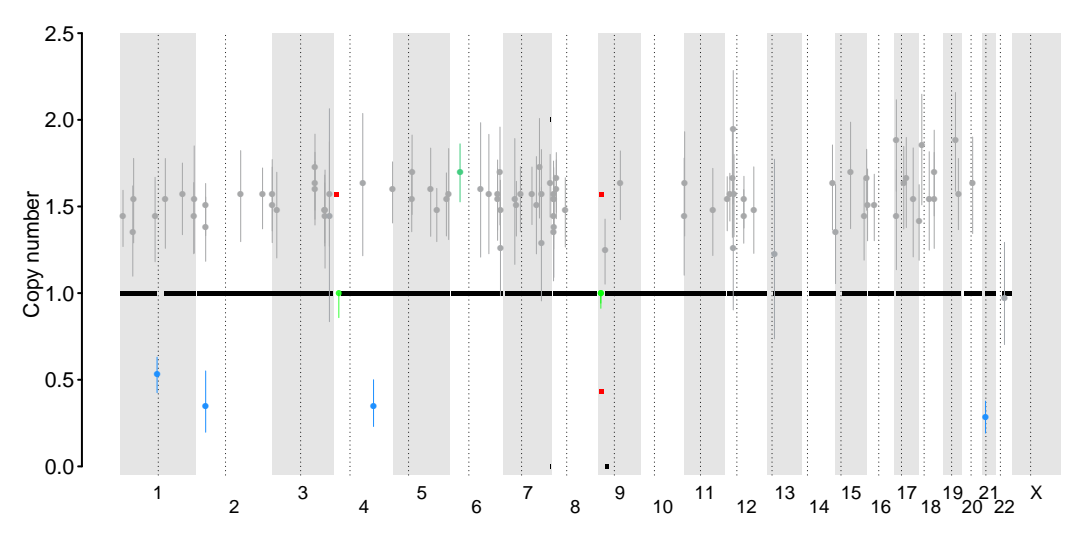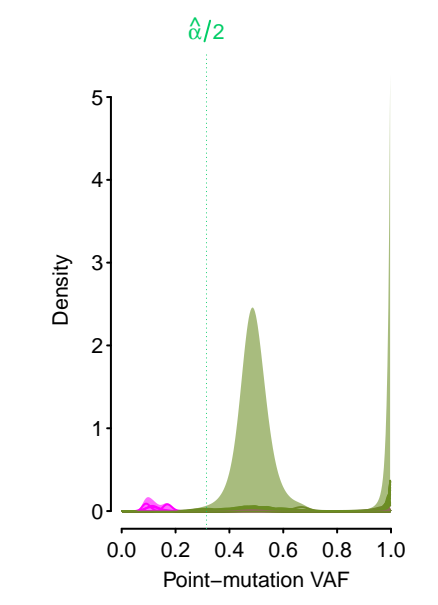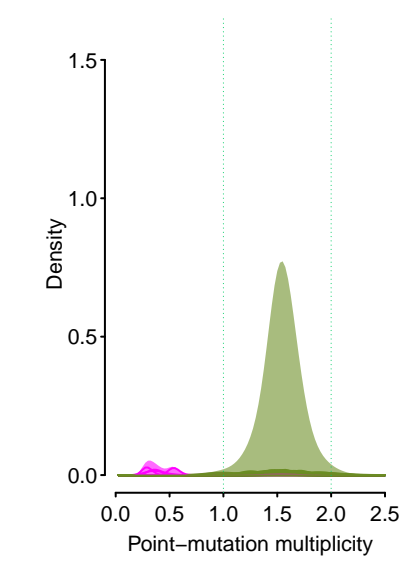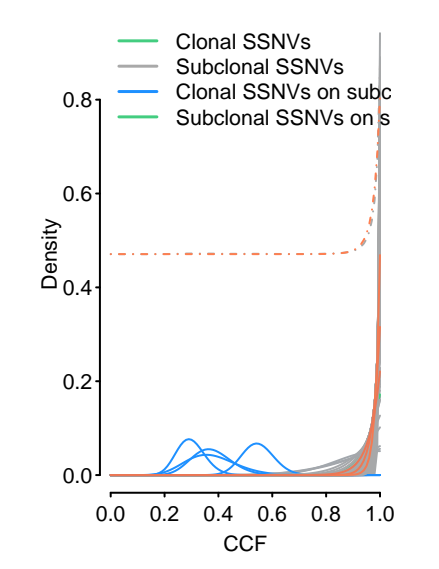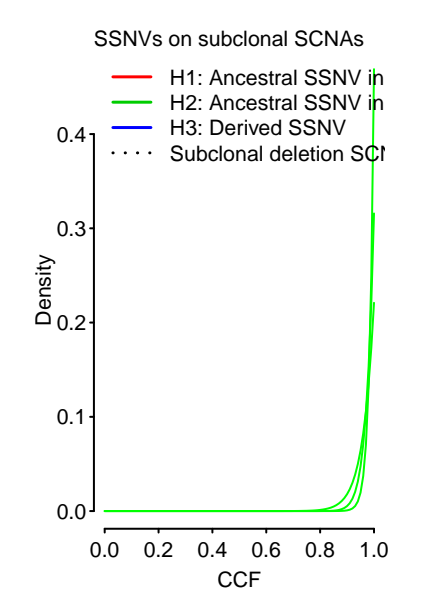

Sample 52

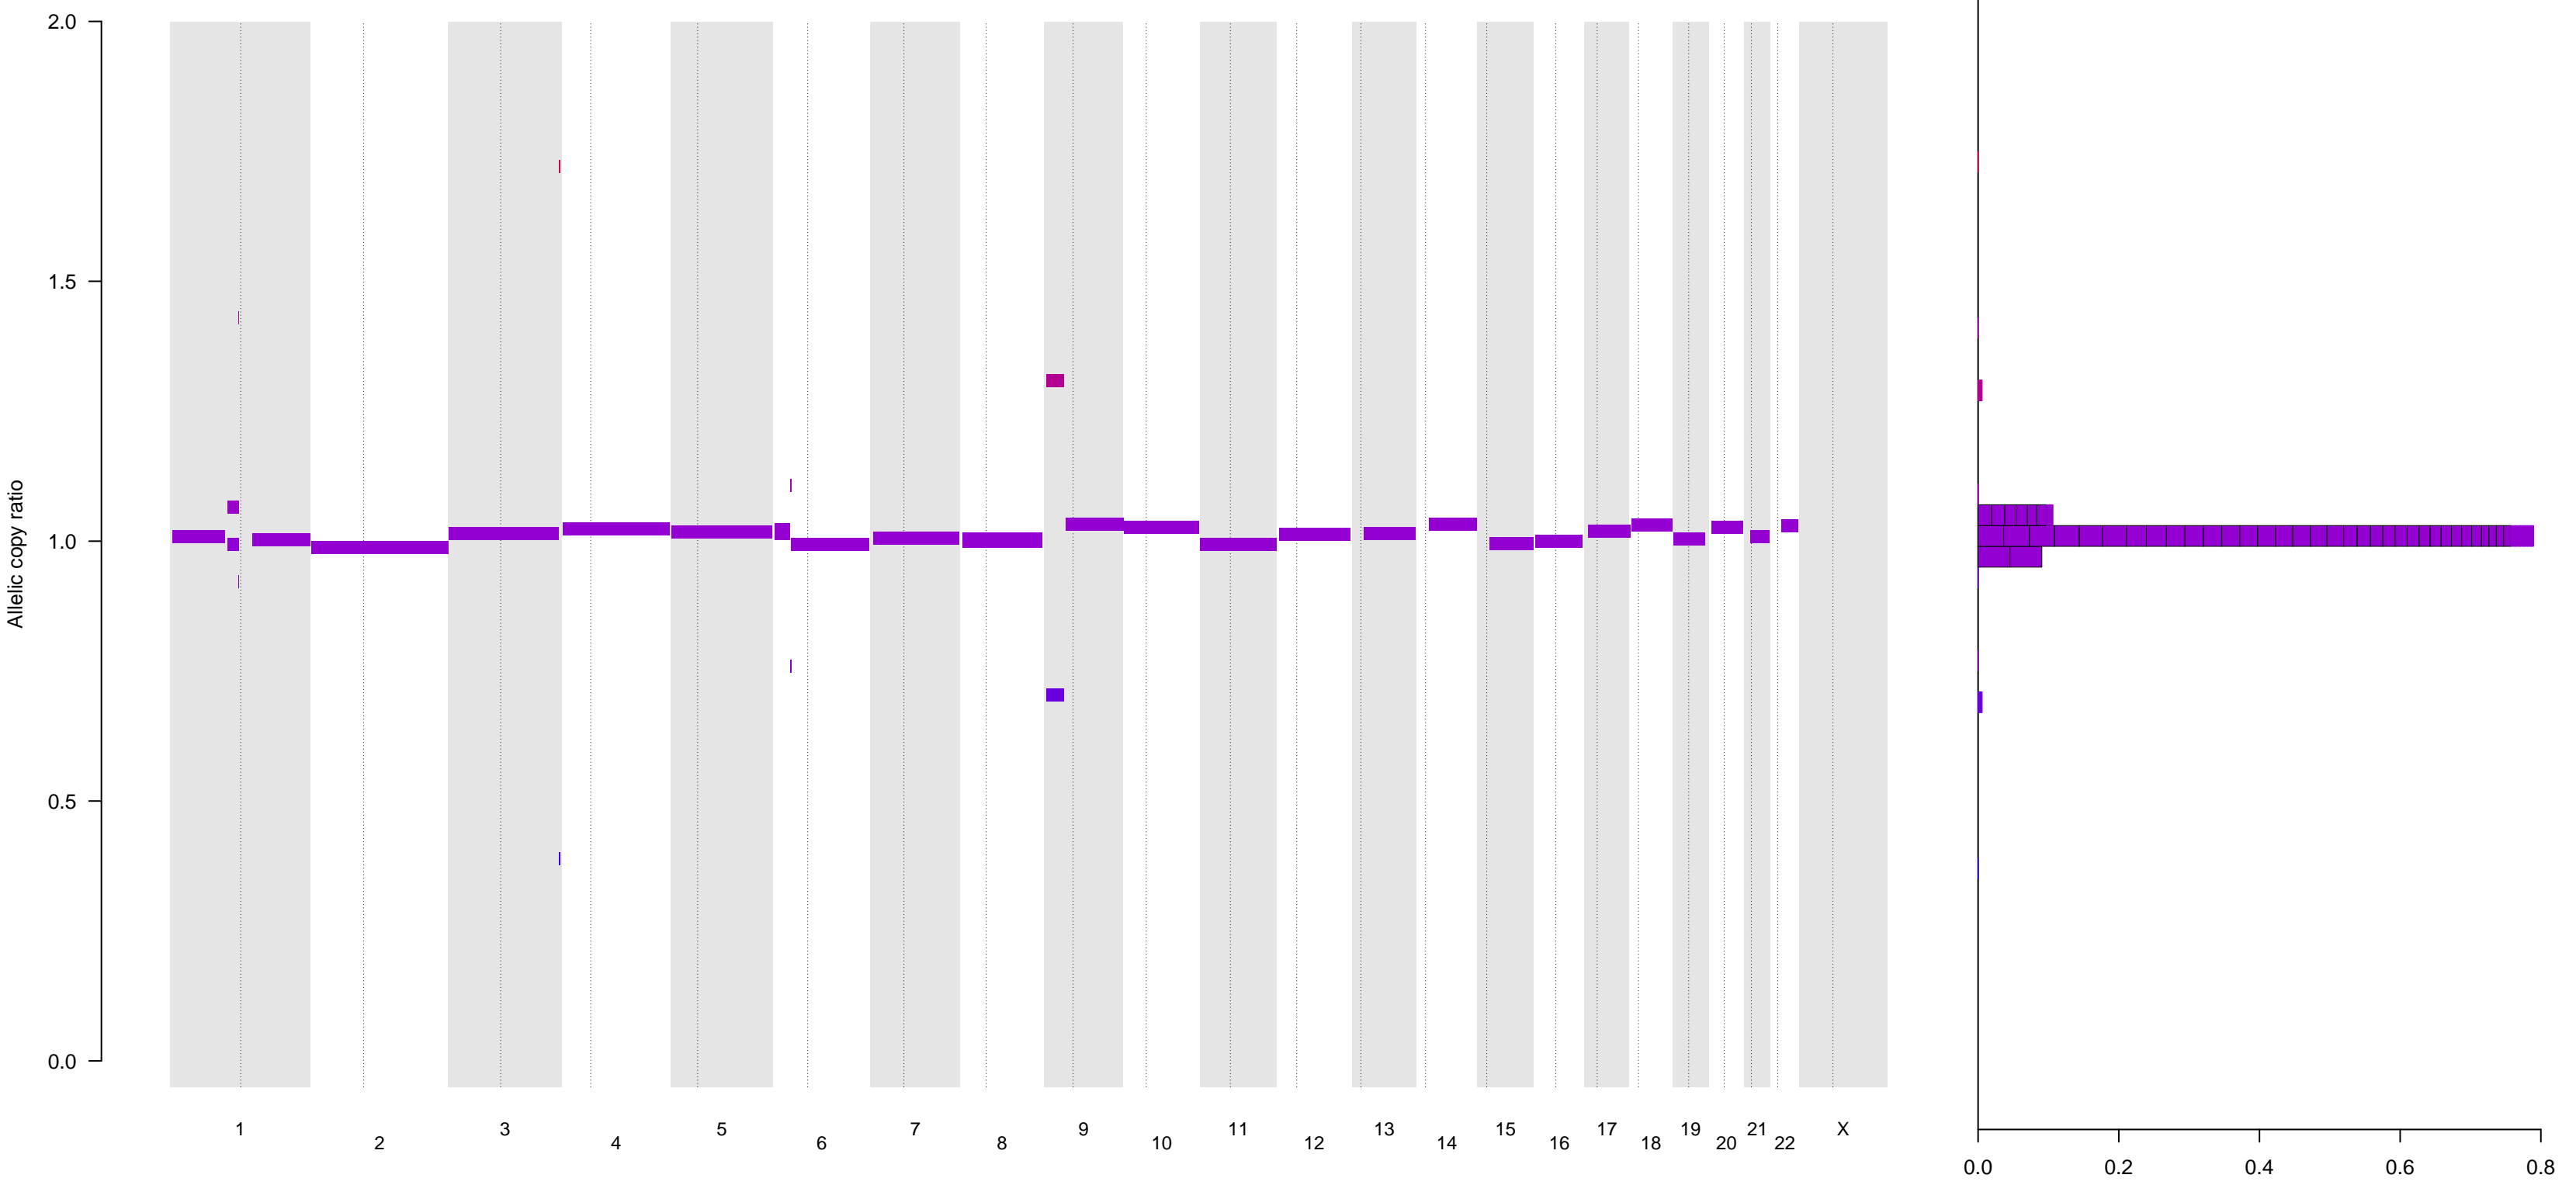

purity( $\hat{\alpha}$ ) = 0.3, ploidy:  $\hat{t} = 1.92$ ,  $\hat{t}_0 = 2$   
 $\theta_z = 0$ ,  $\theta_0 = 1.298$ , WGD=0  
 SCNA LL = -130.56, SSNV LL = -7968.97, SCNA Ev = -33.49066

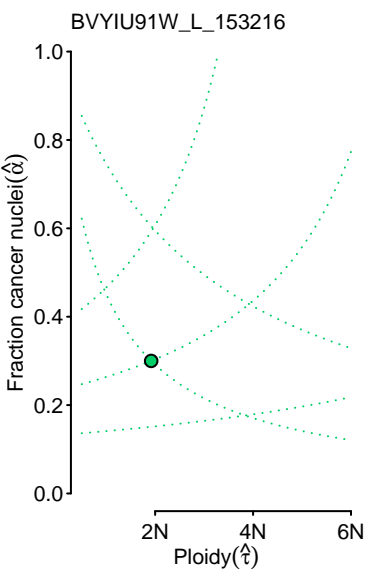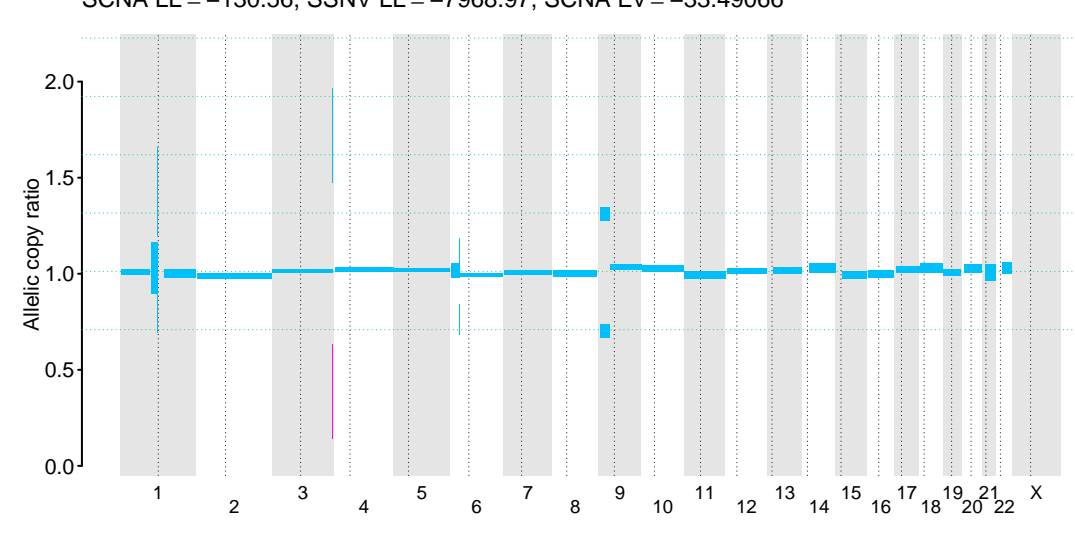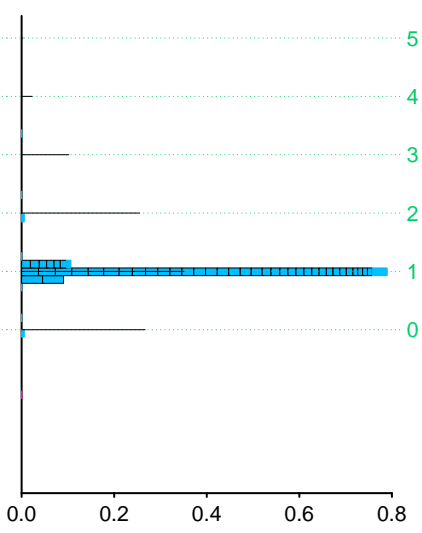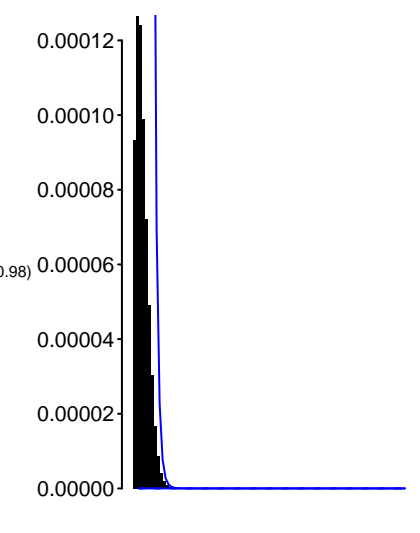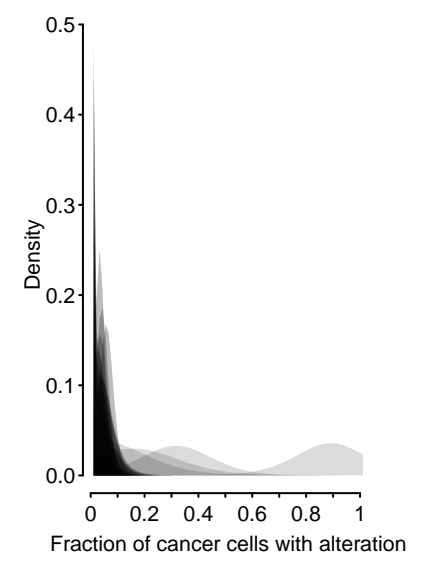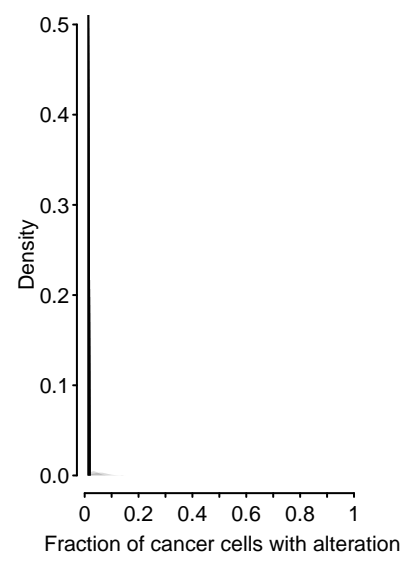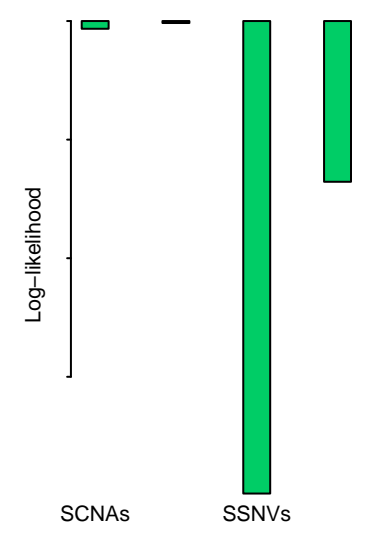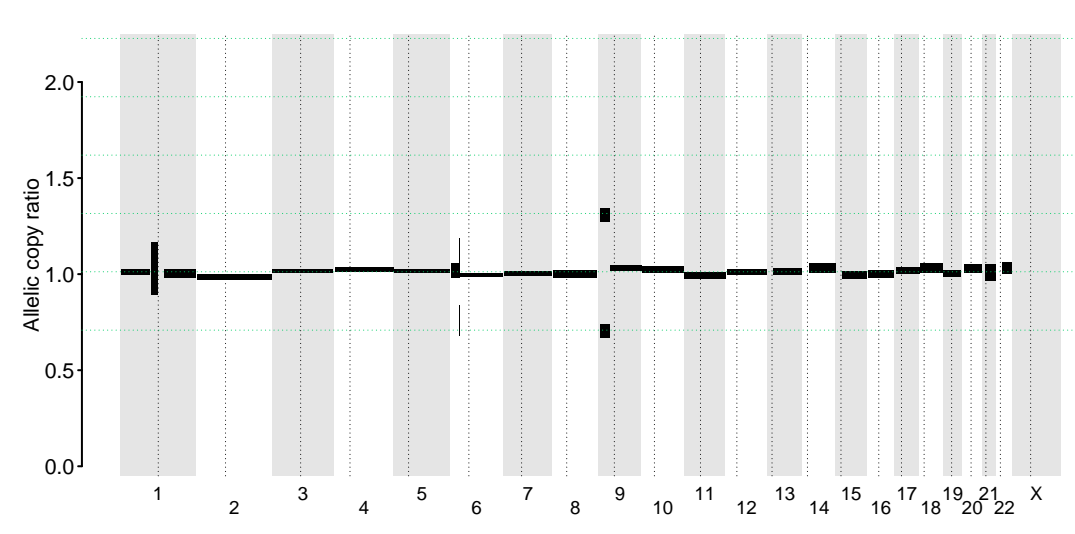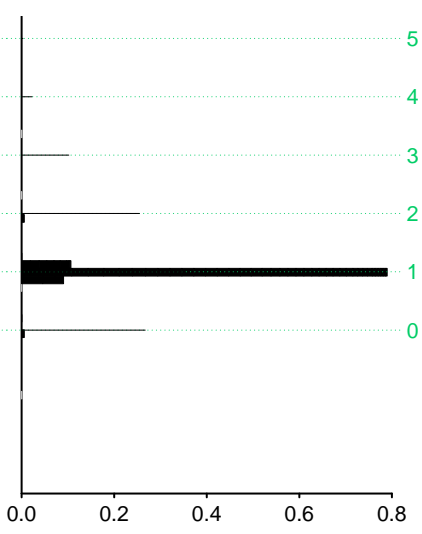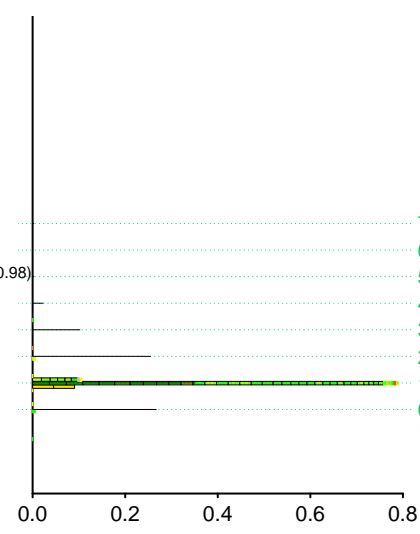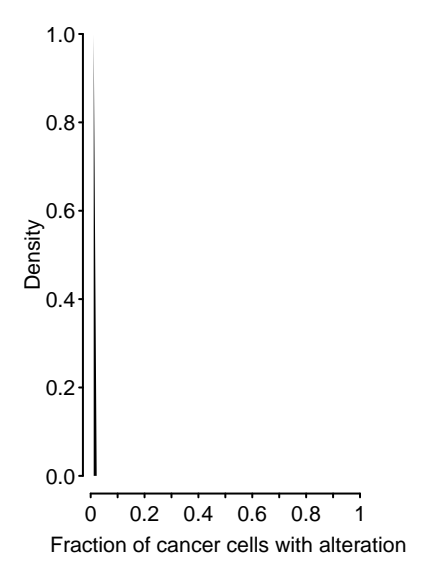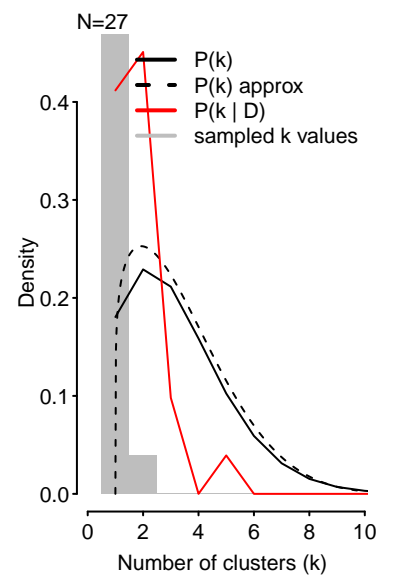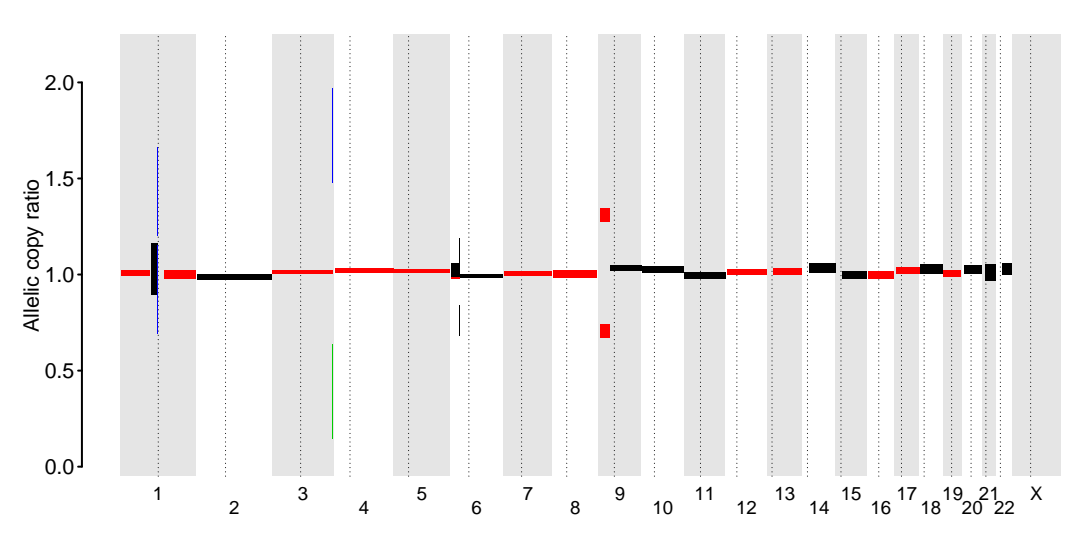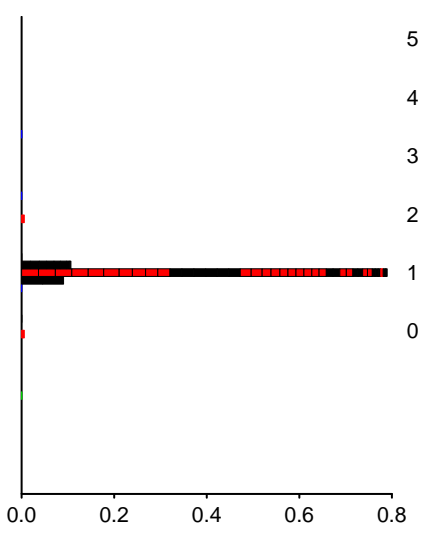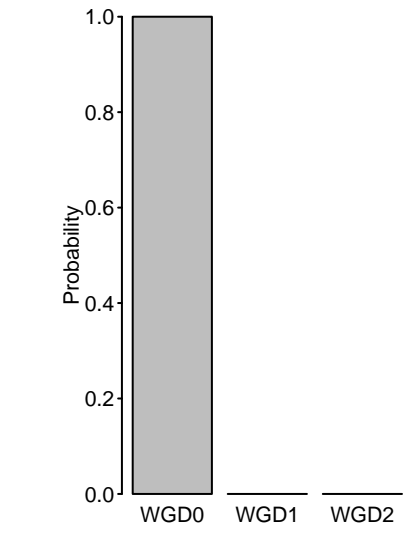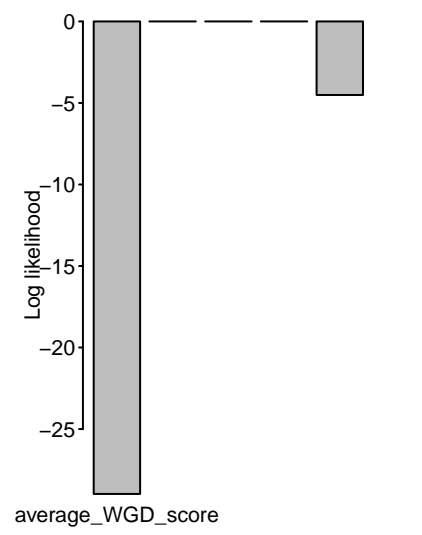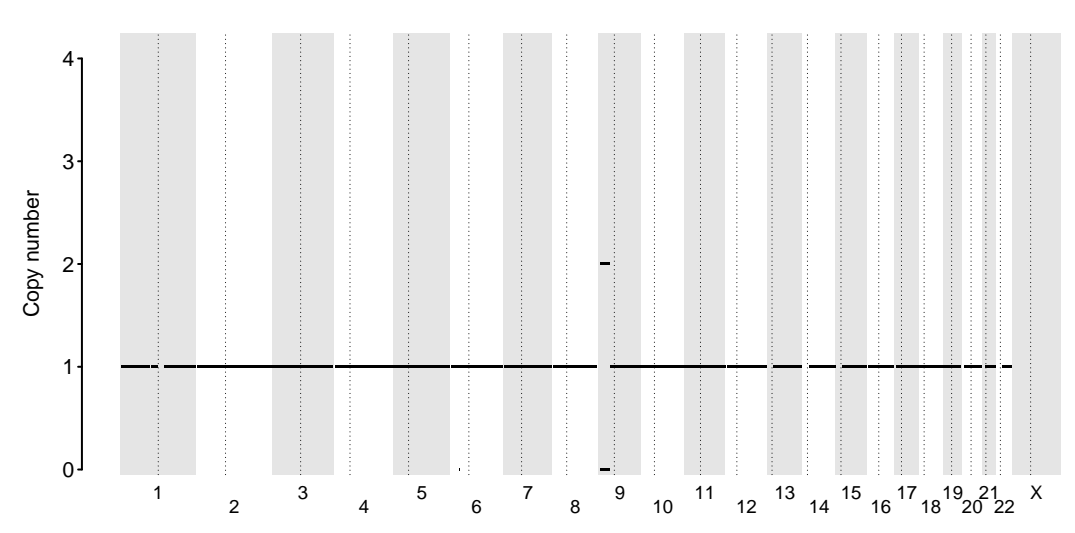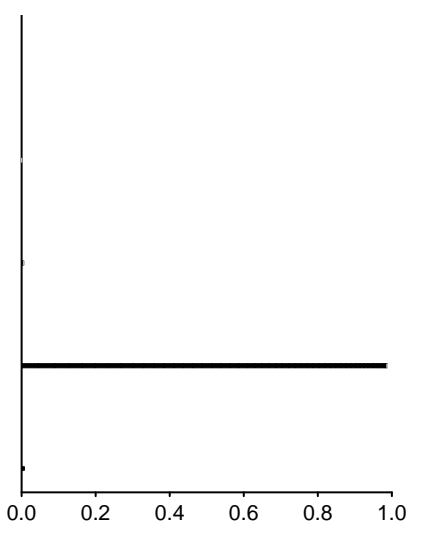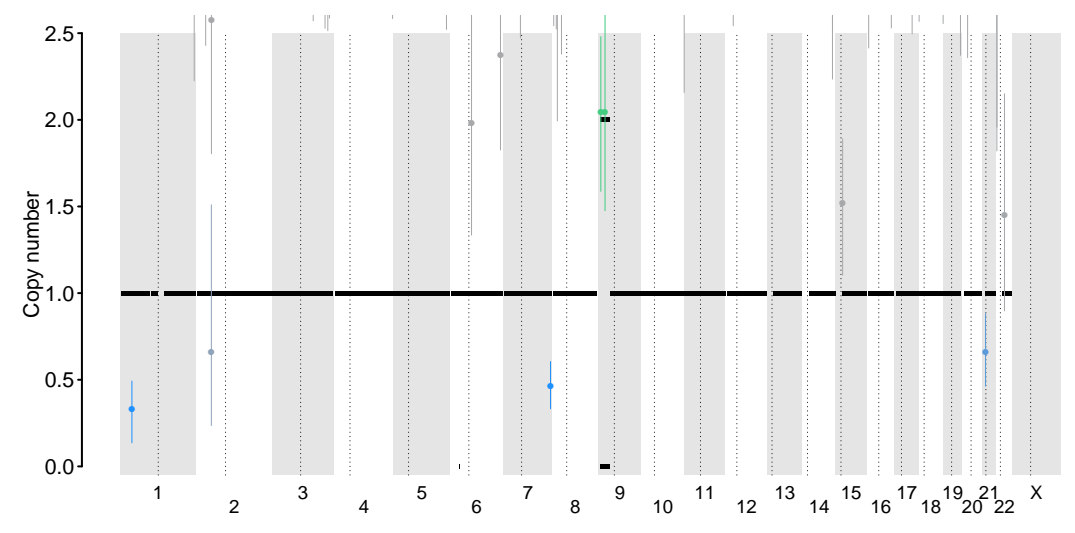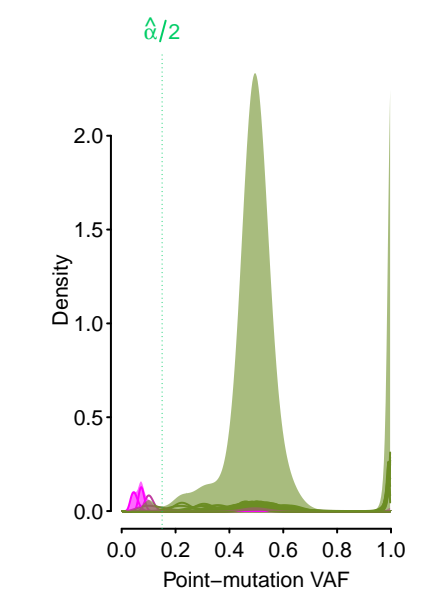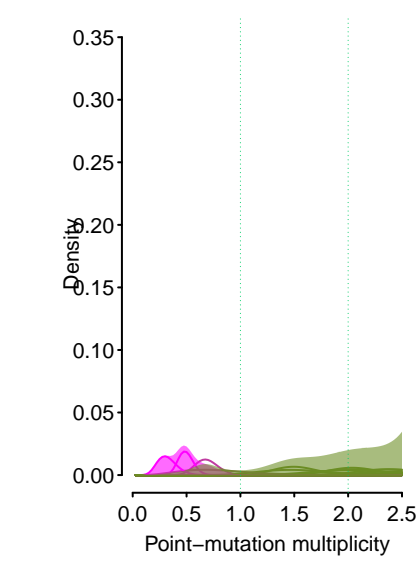

Sample 53

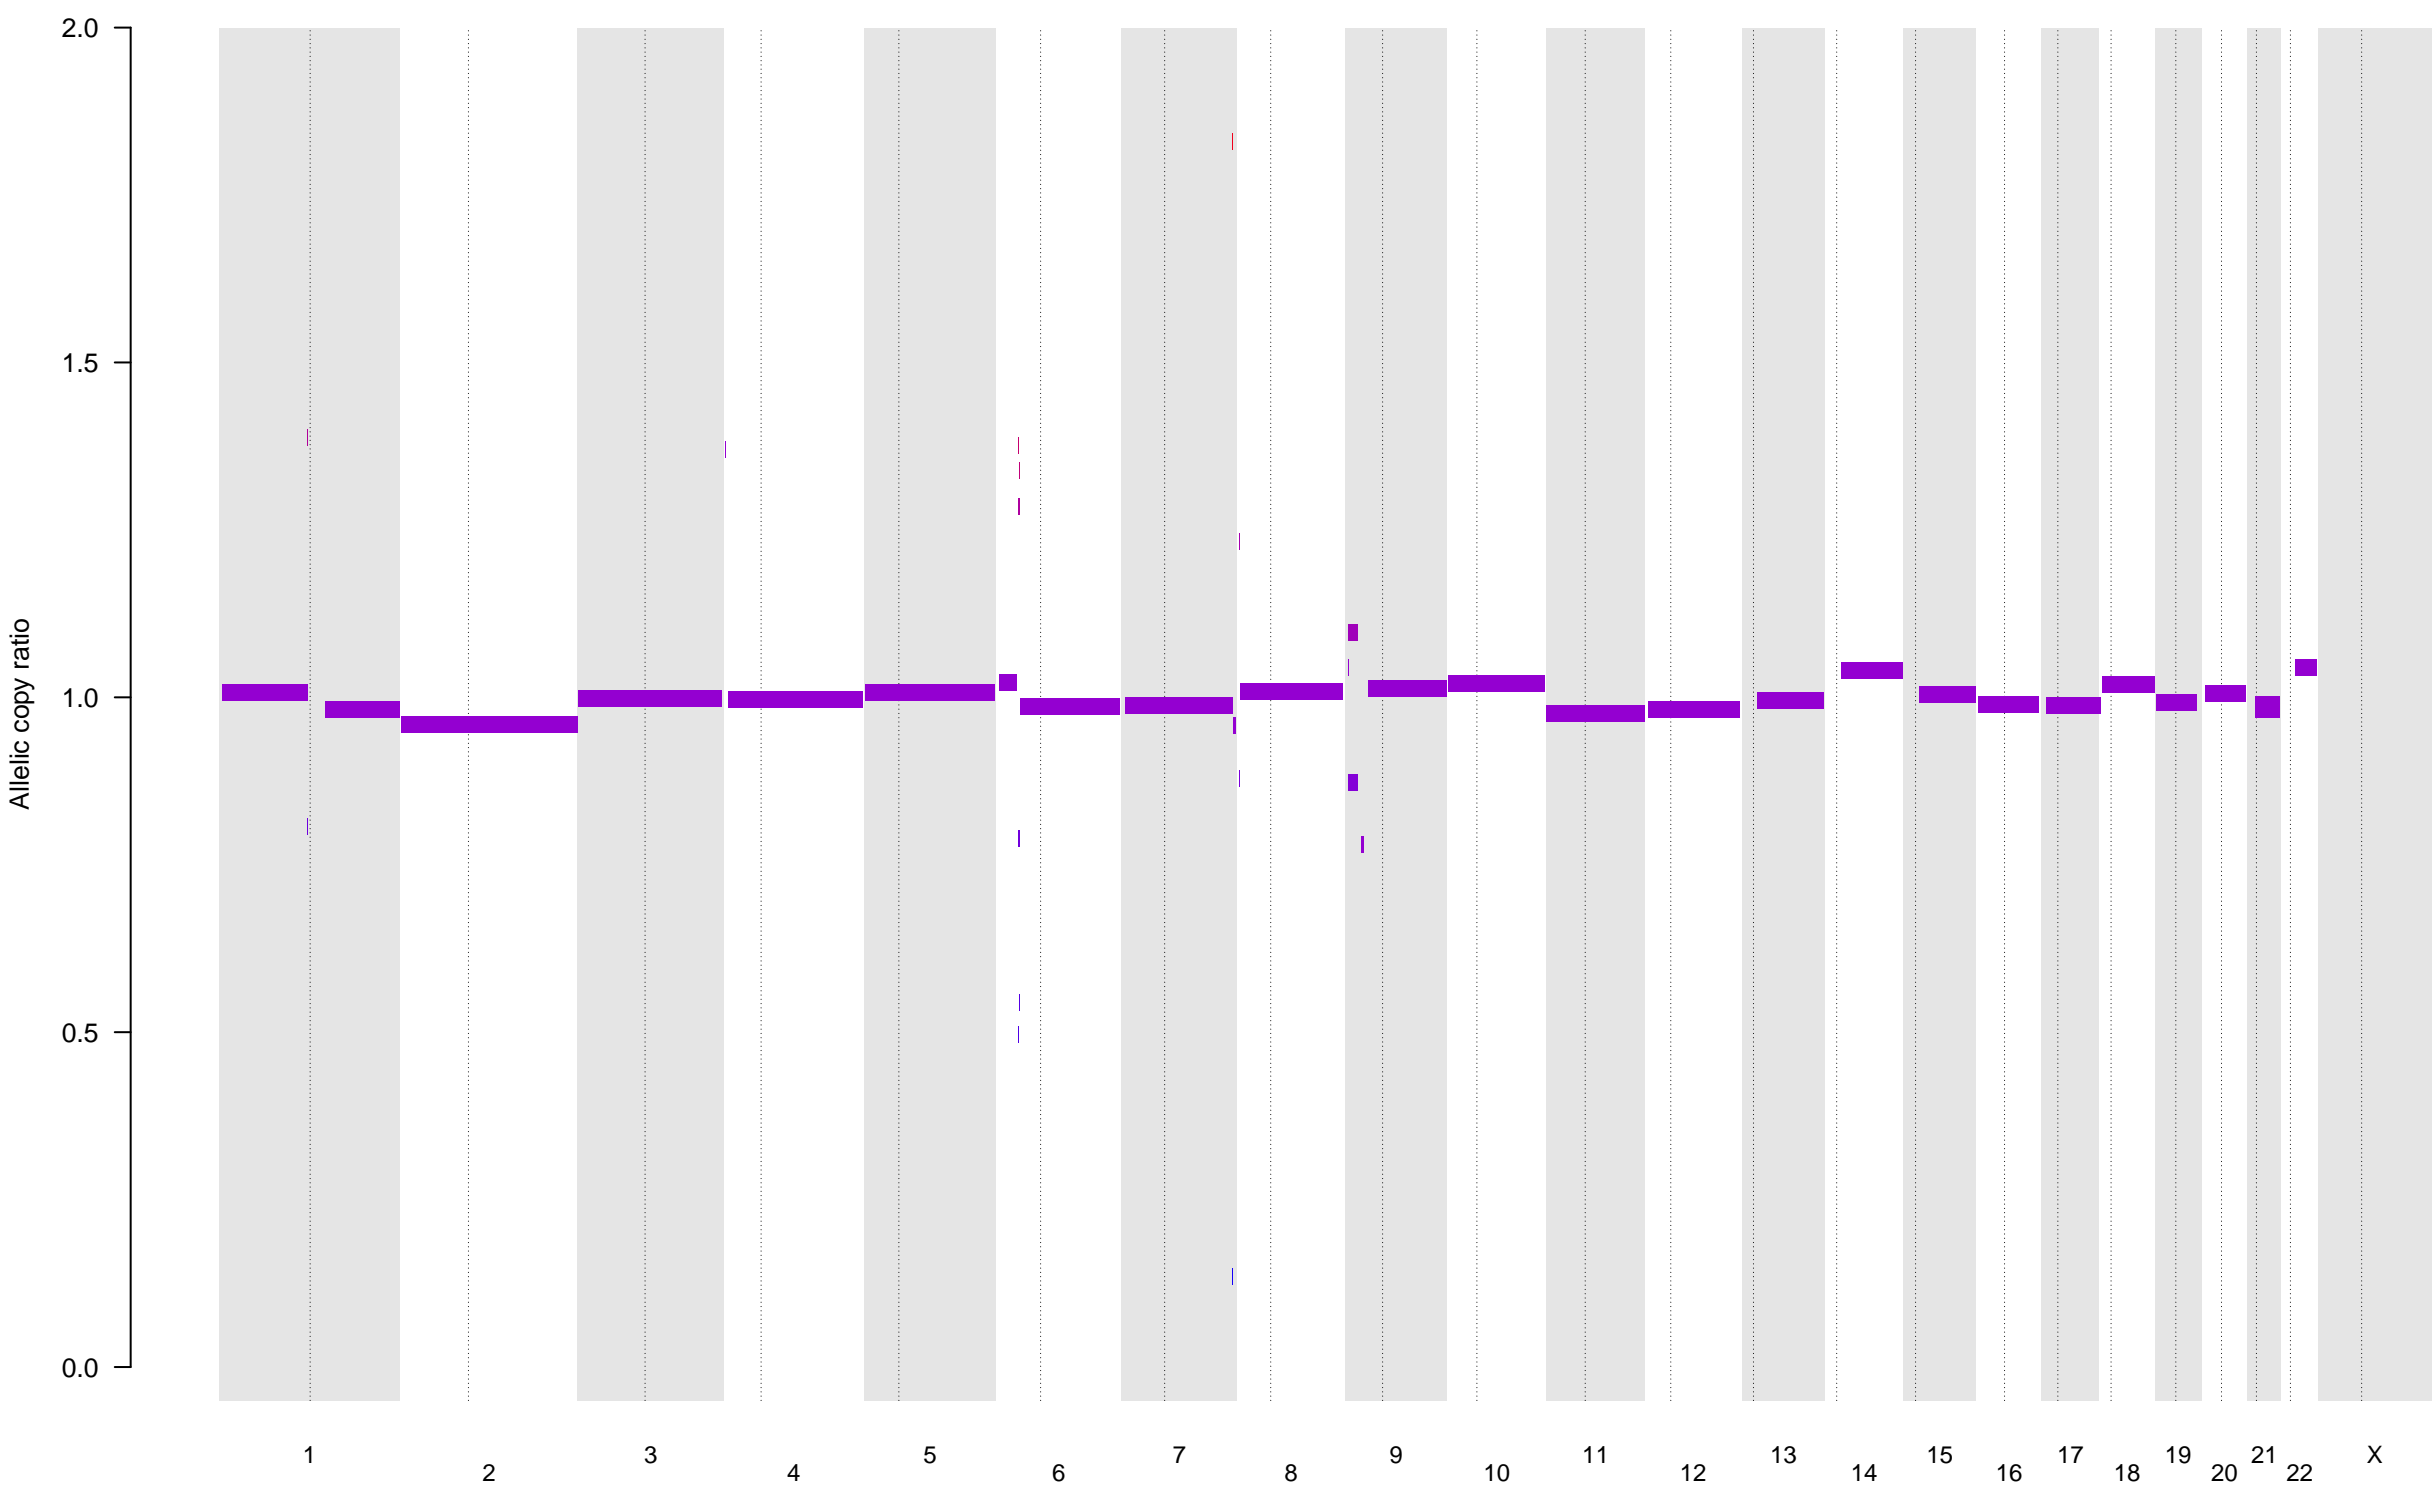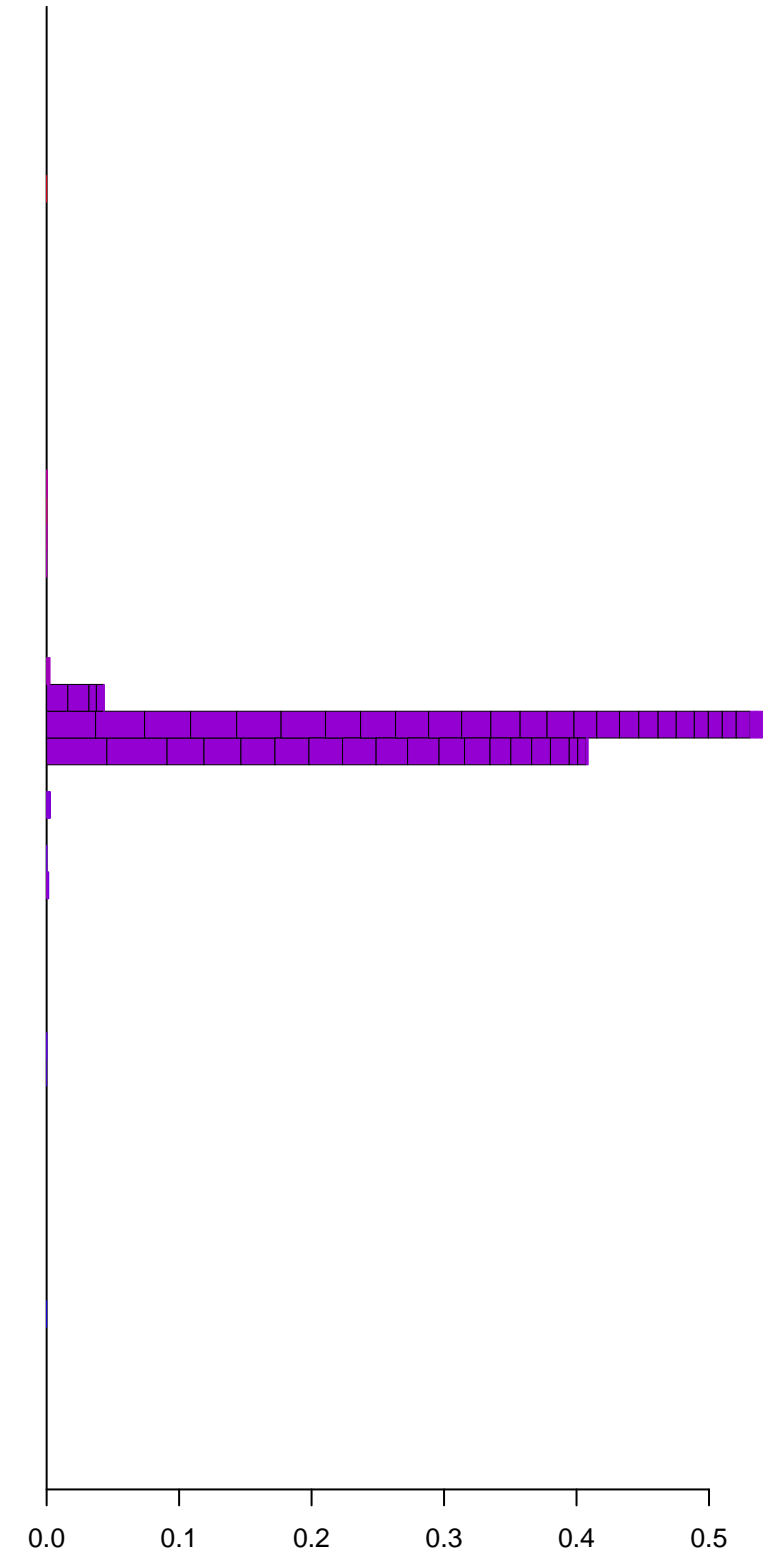

$\hat{\alpha}_x = 0.17$ , ploidy:  $\hat{\tau} = 2.05$ ,  $\hat{\tau}_g = 2$   
 $\theta_z = 0.1$ ,  $\theta_0 = 1.706$ , WGD=0  
 SCNA LL = -246.93, SSNV LL = -13657.21, SCNA Ev = -55.40828

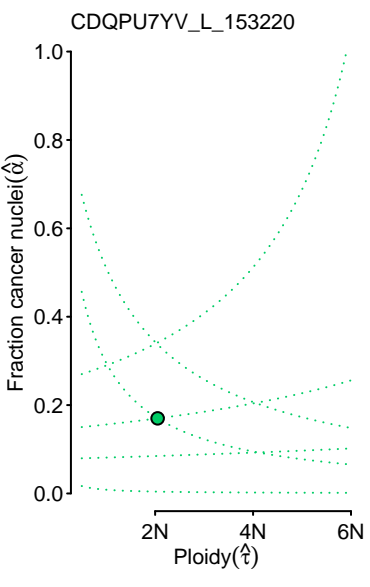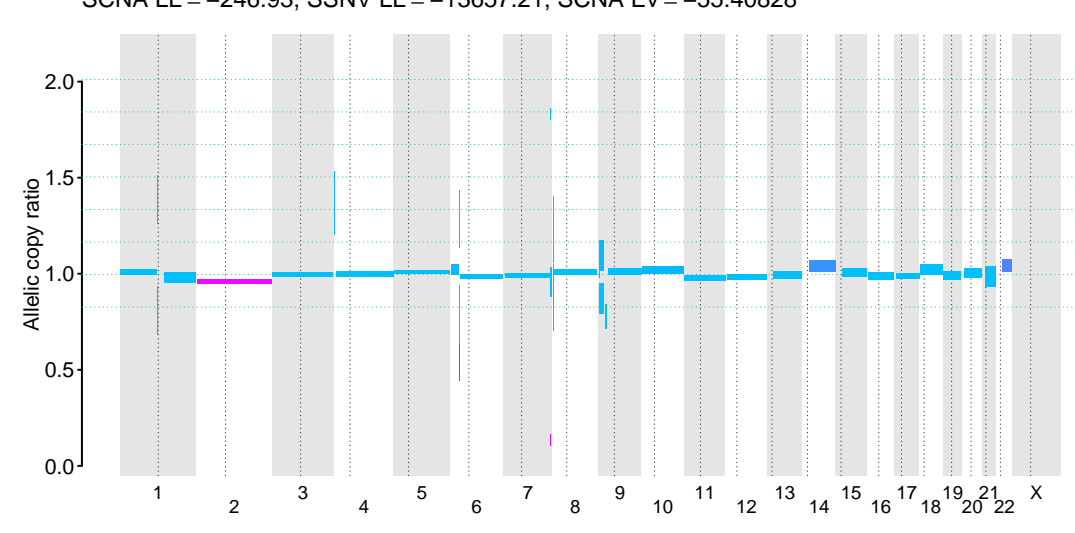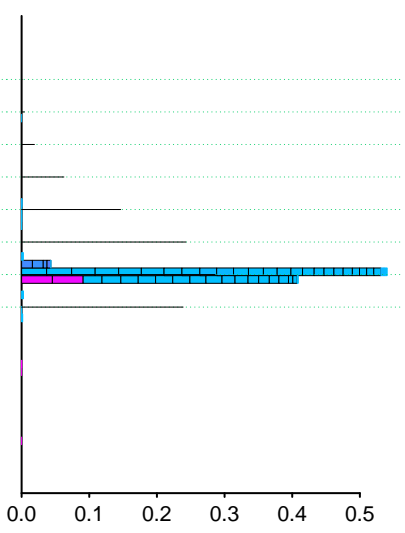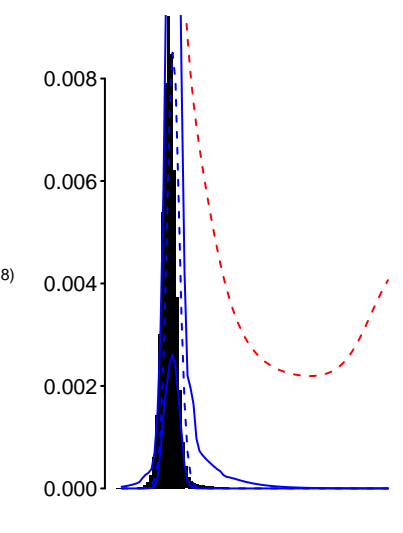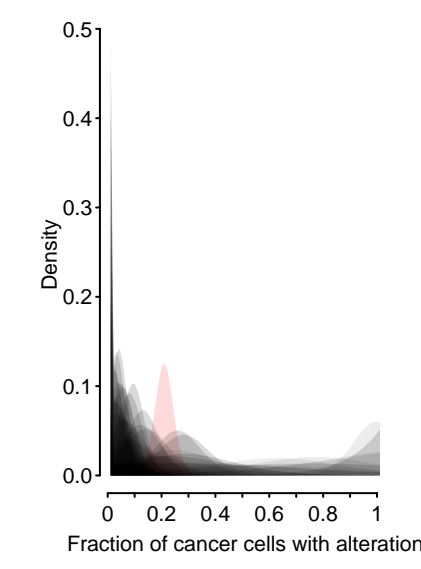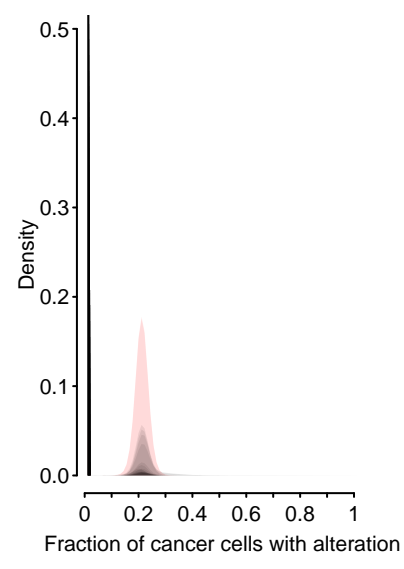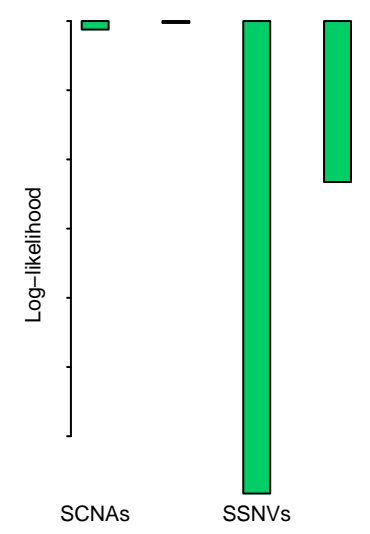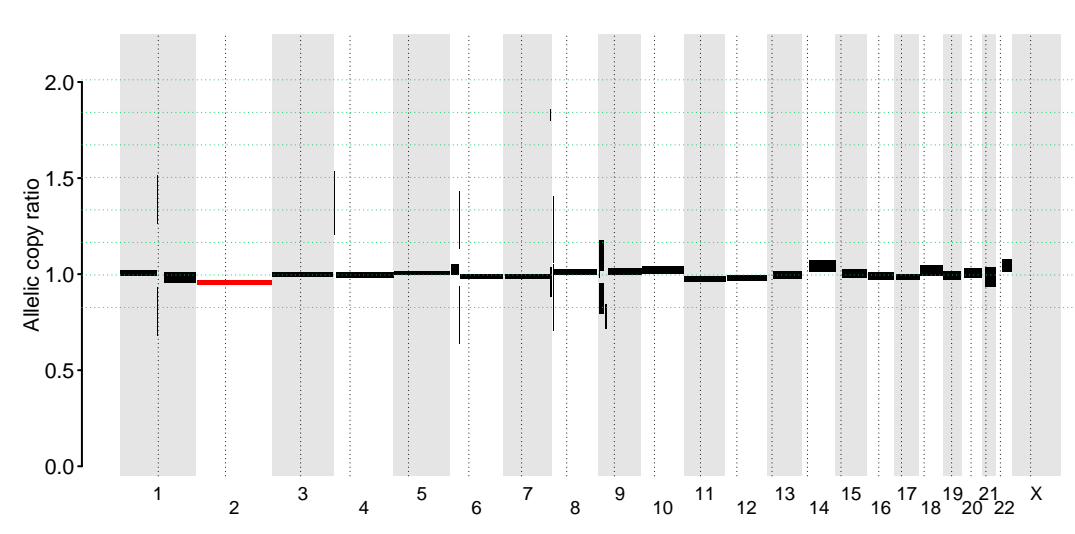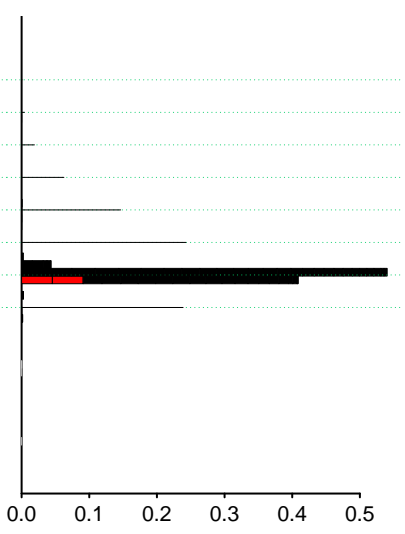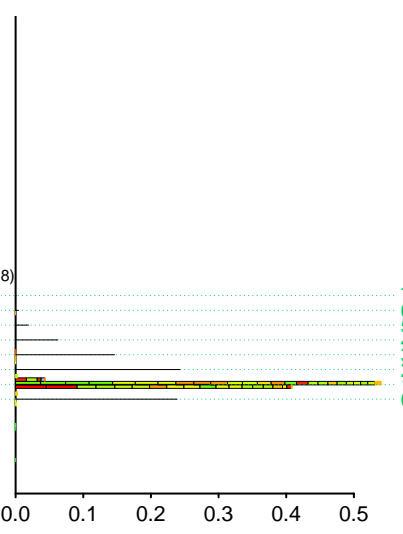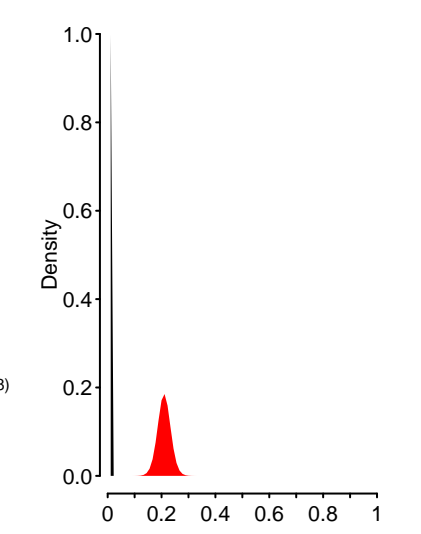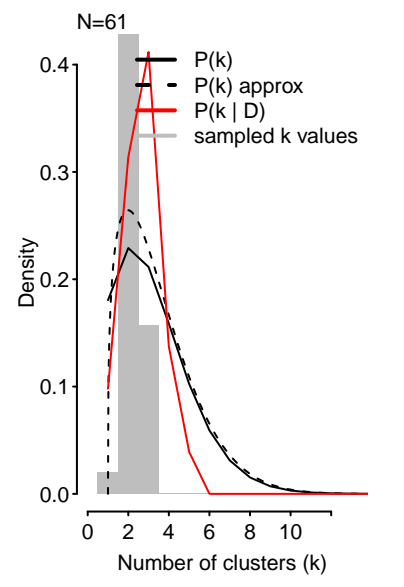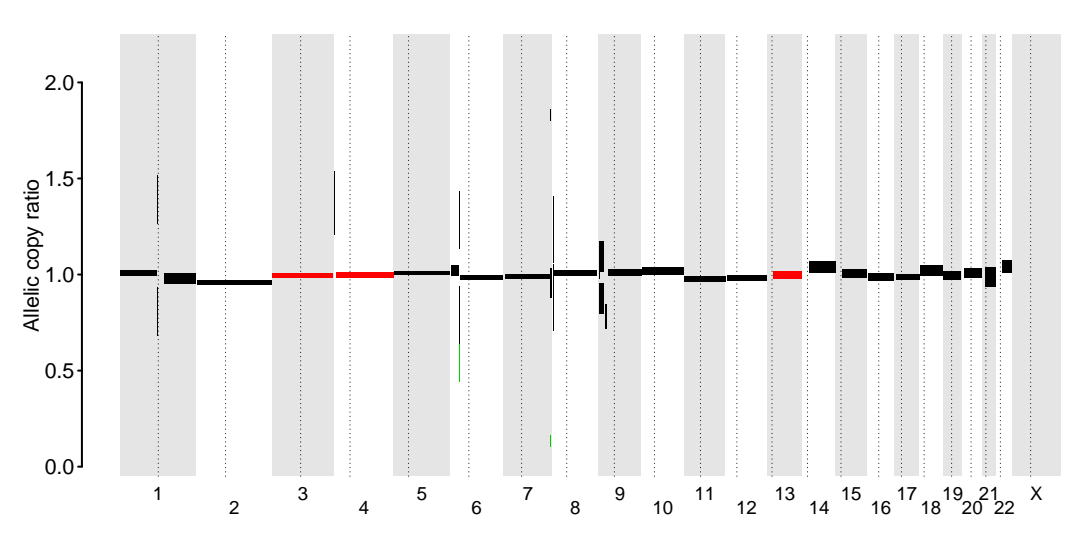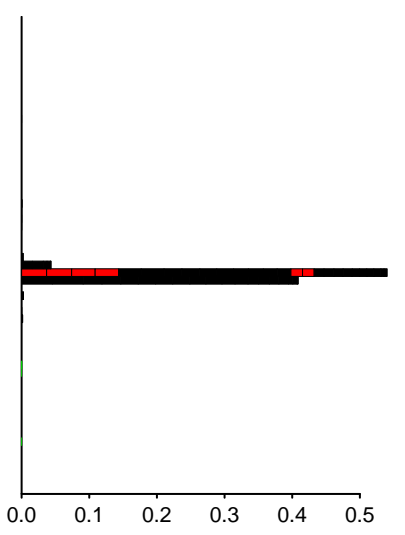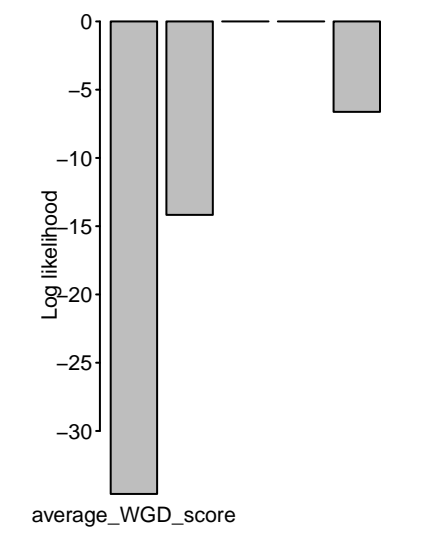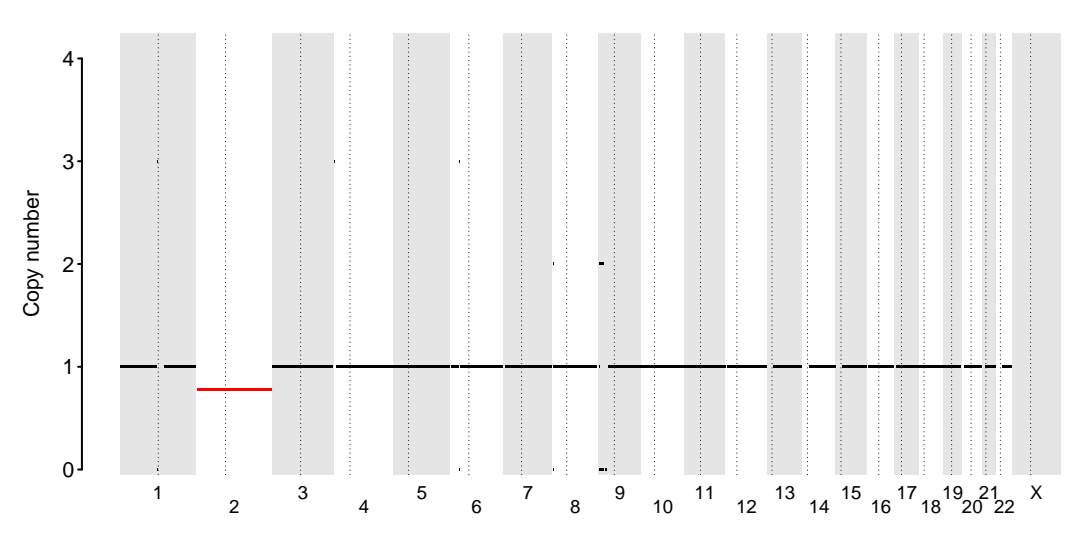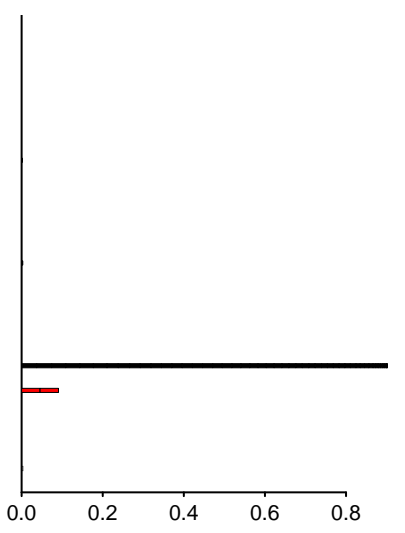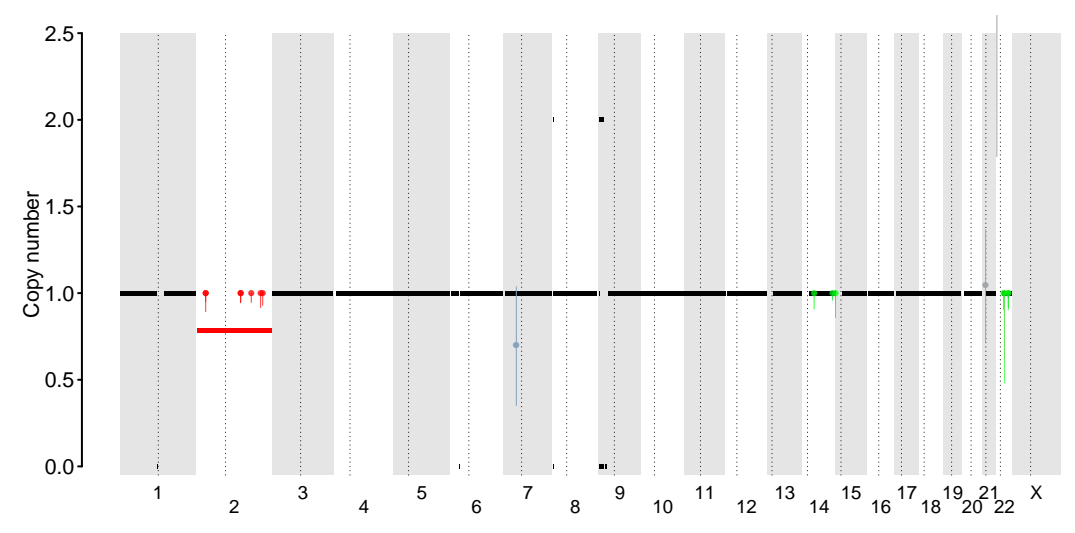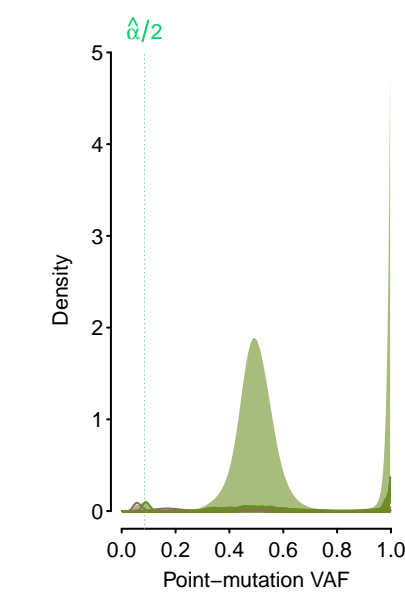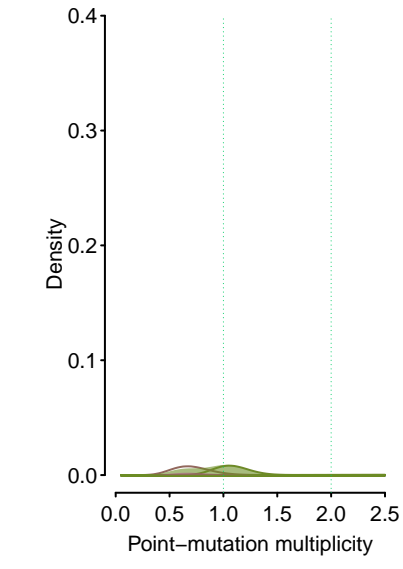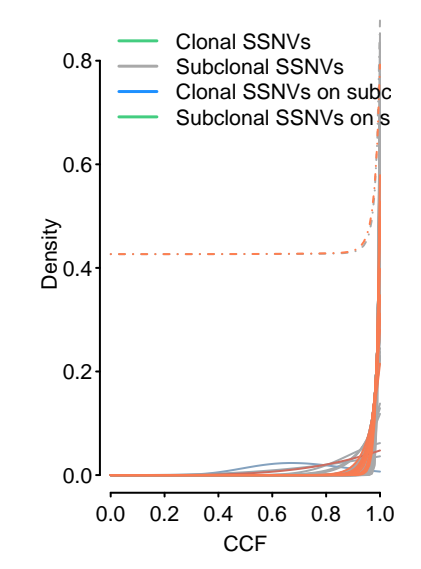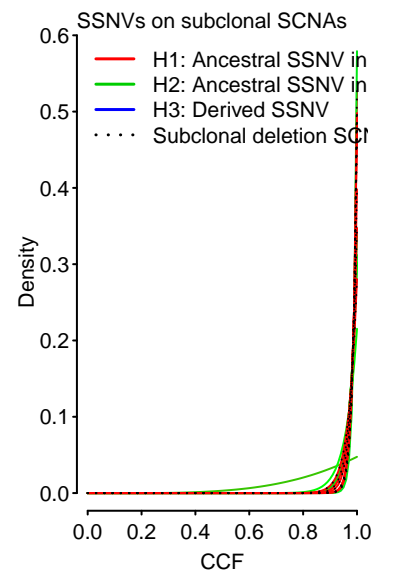



Sample 56

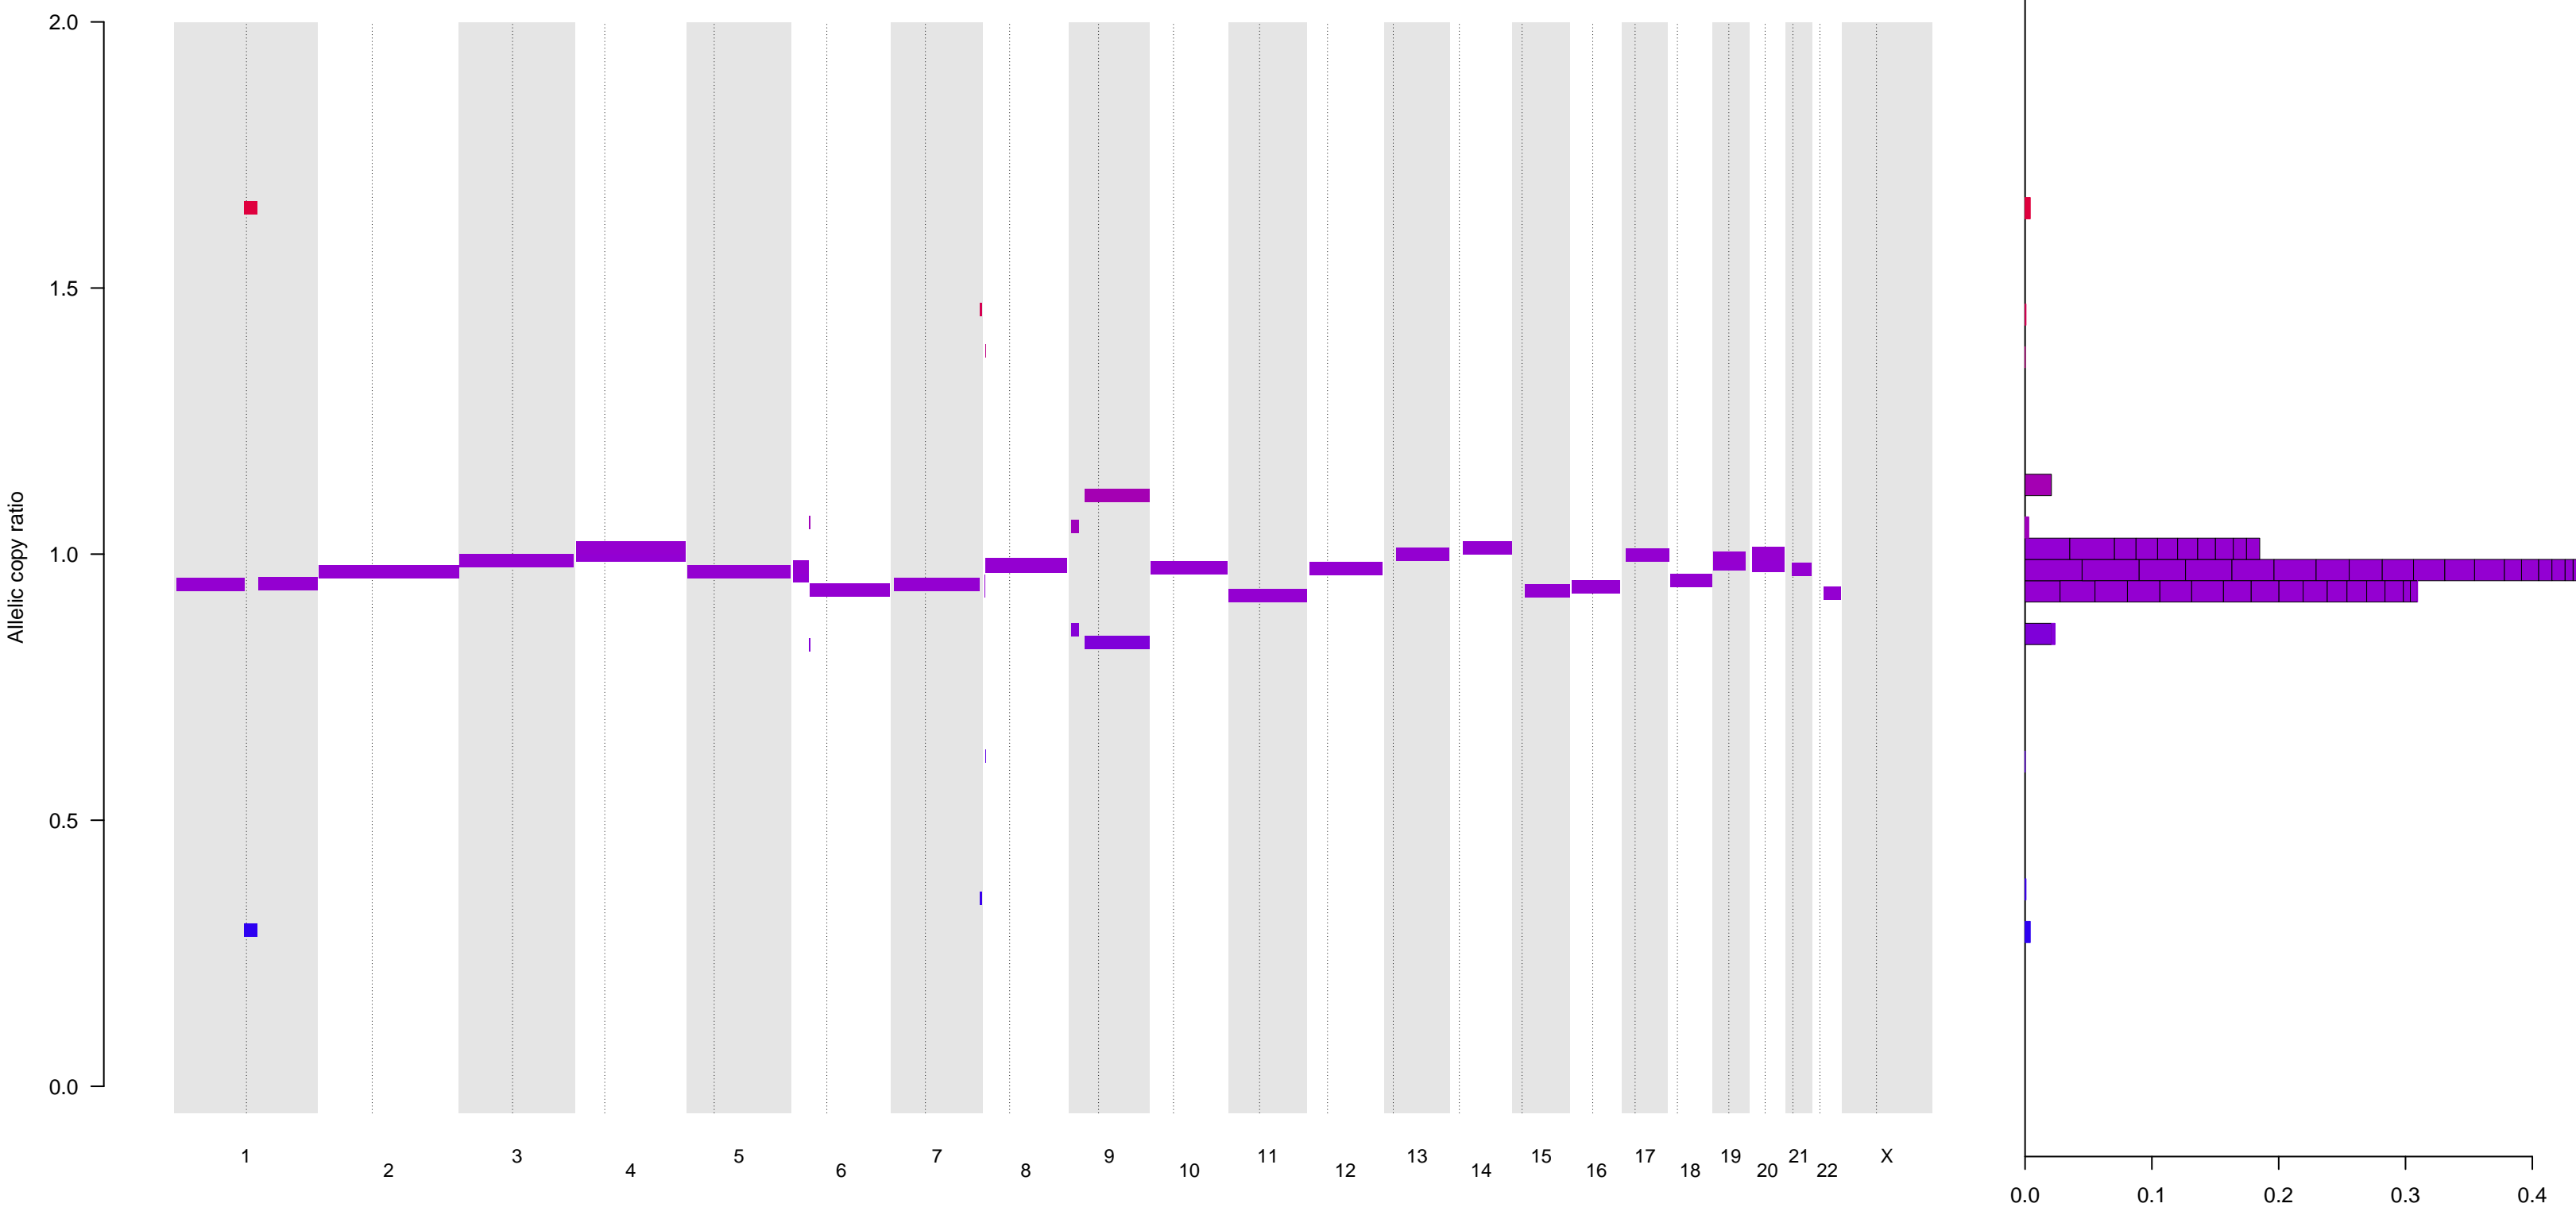

EJZHUA60\_L\_153221

purity( $\hat{\alpha}$ ) = 0.15, ploidy:  $\hat{t} = 2.52$ ,  $\hat{t}_g = 2.04$   
 $\theta_z = 0.02$ ,  $\theta_a = 1.568$ , WGD=0  
SCNA LL = -263.48, SSNV LL = -10488.28, SCNA Ev = -37.36297

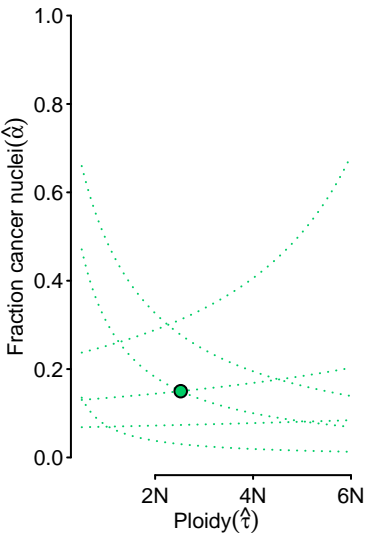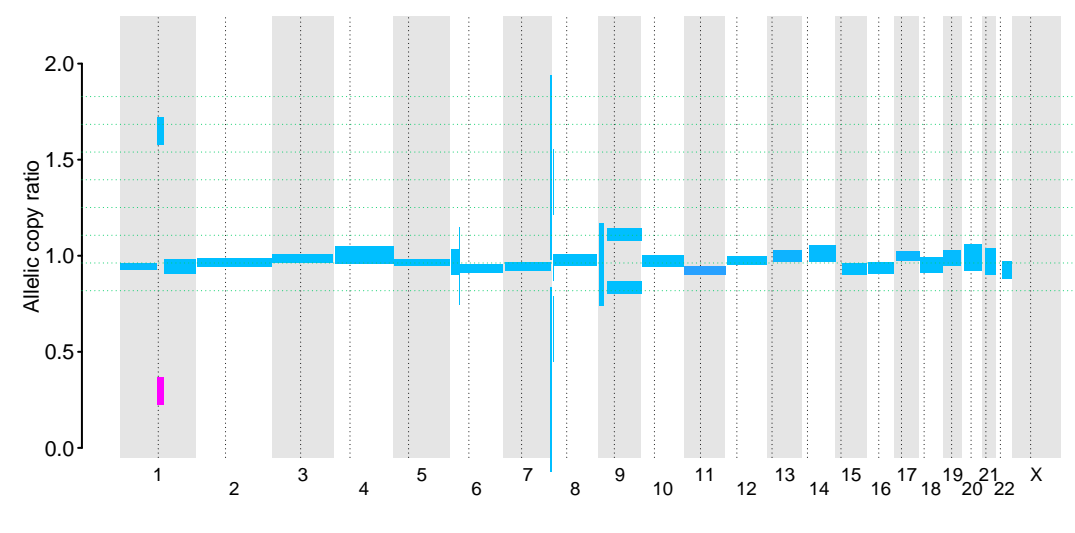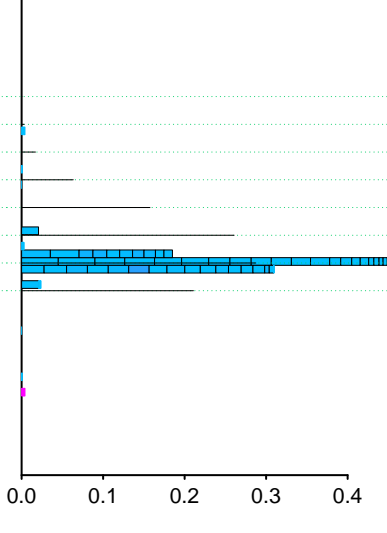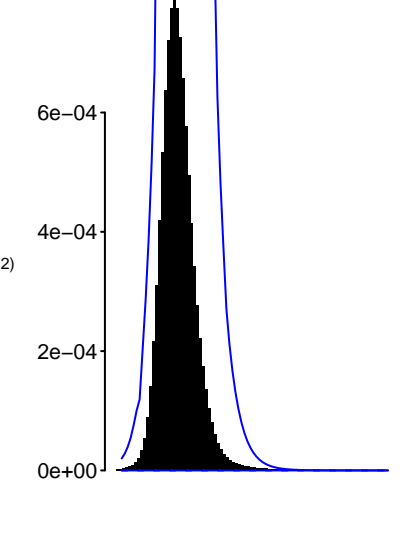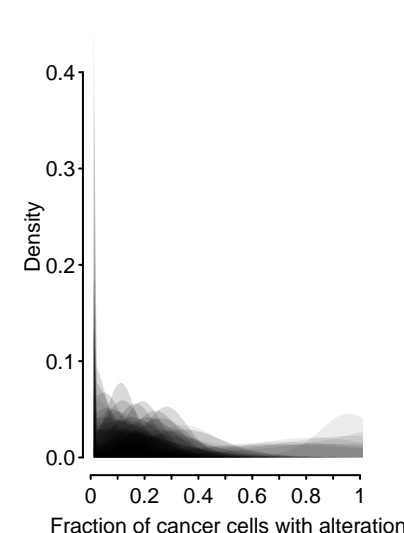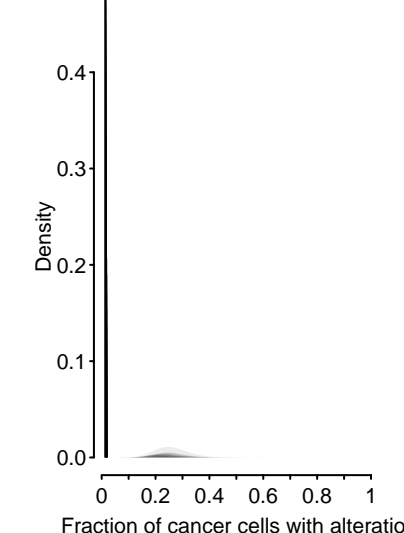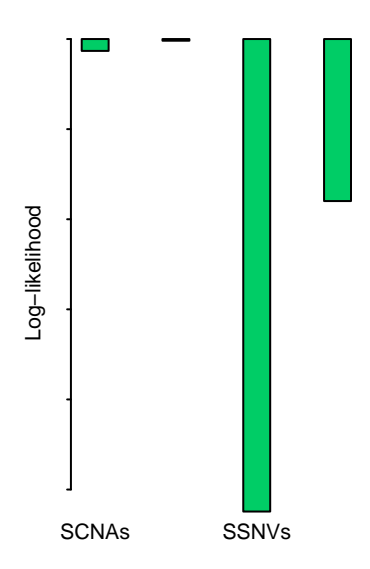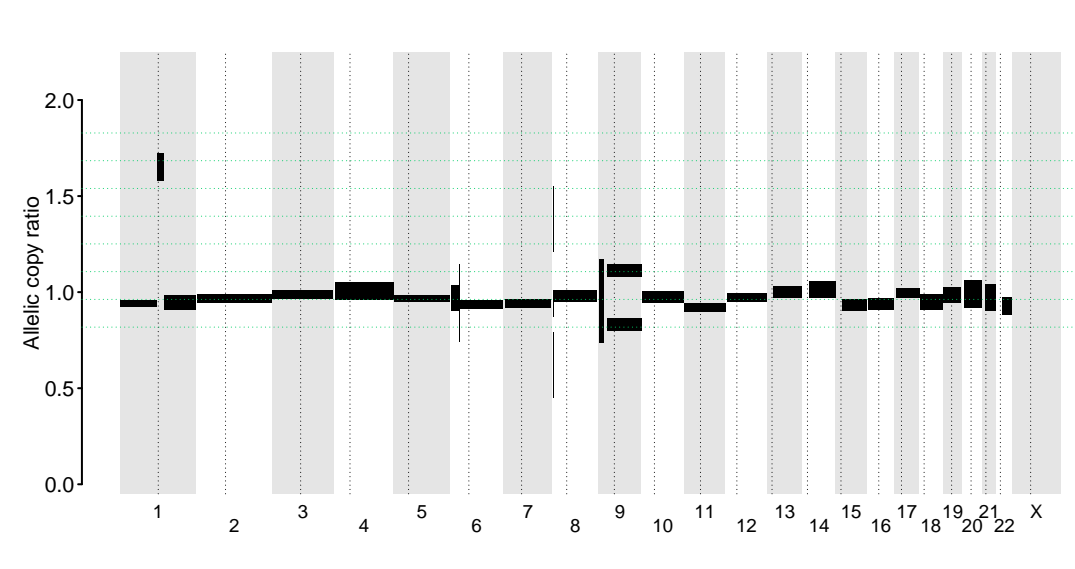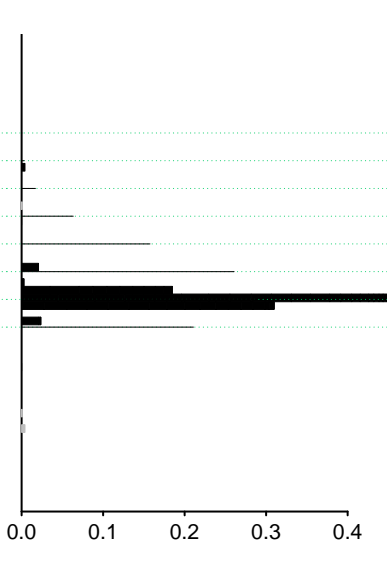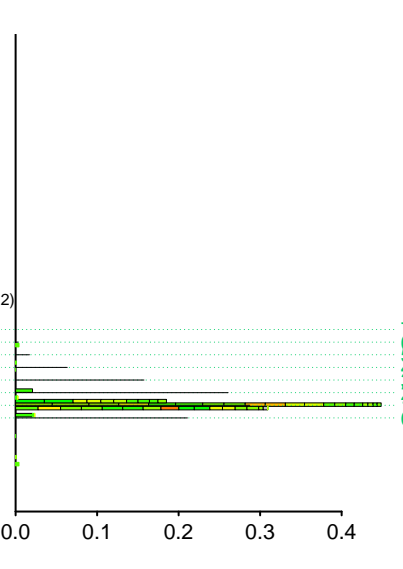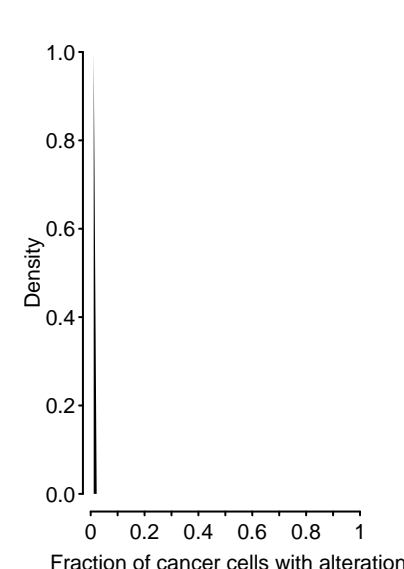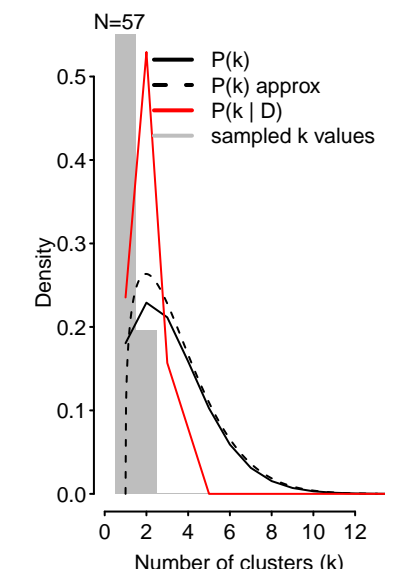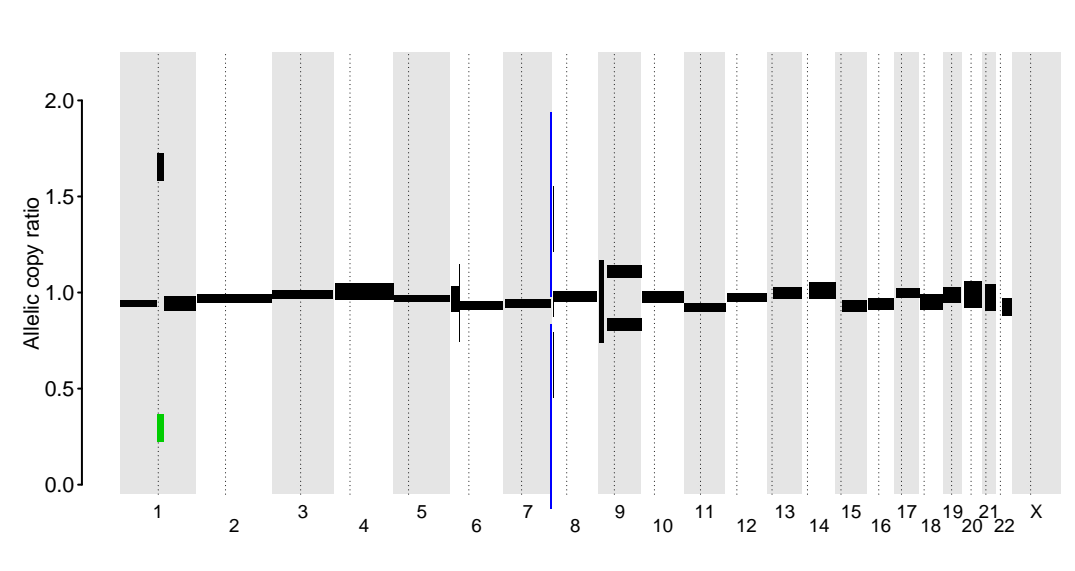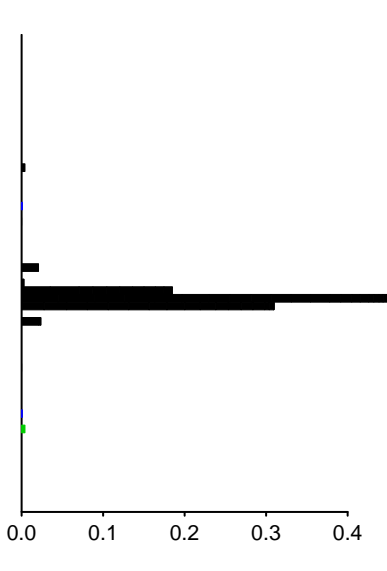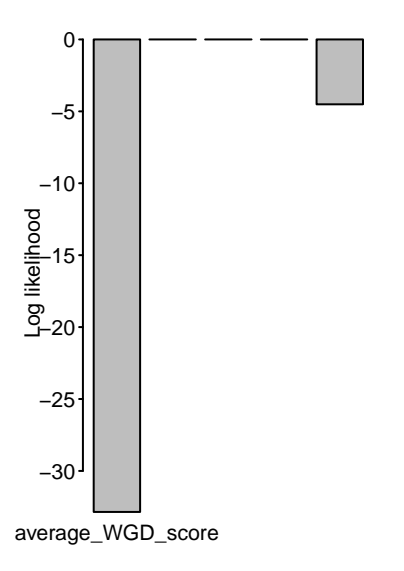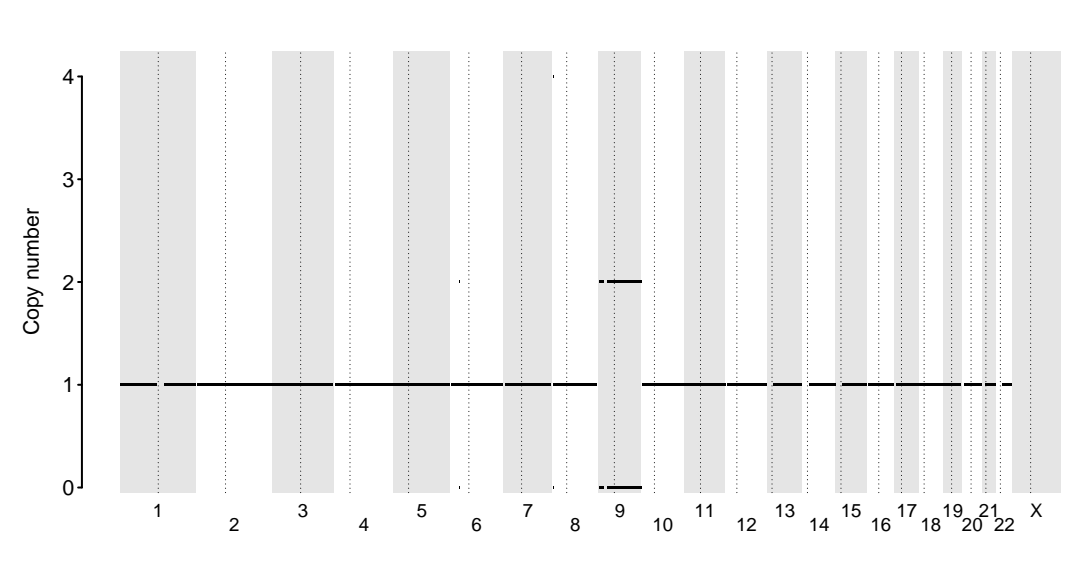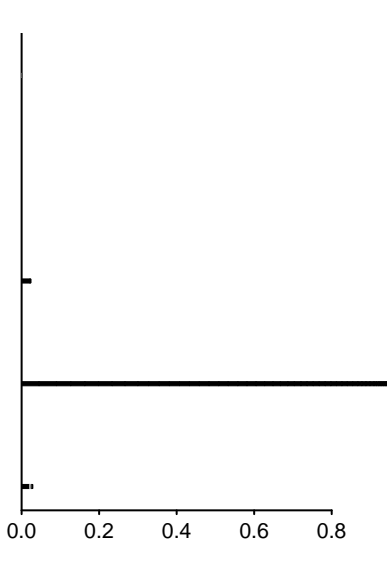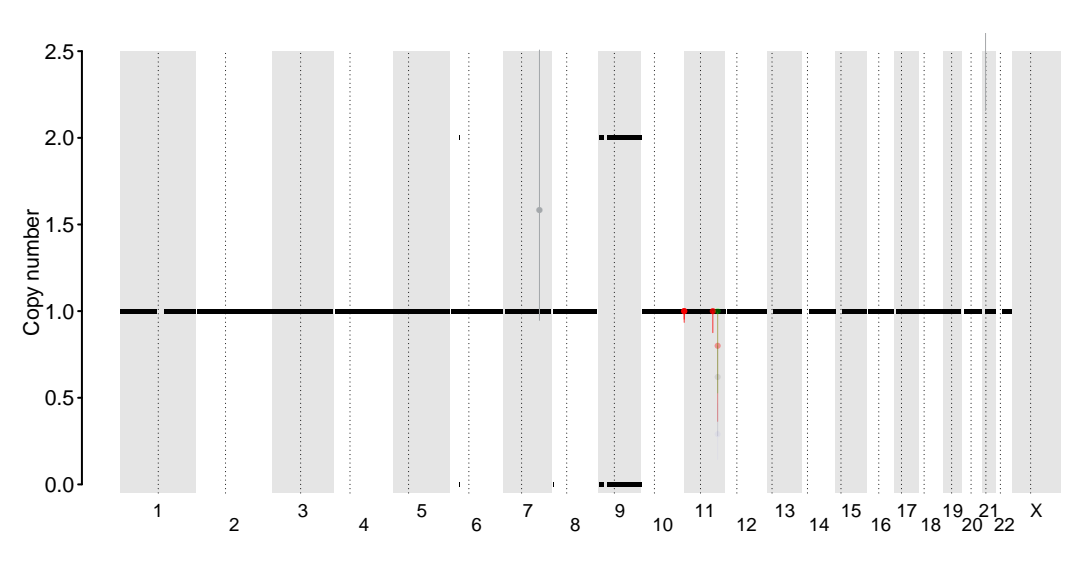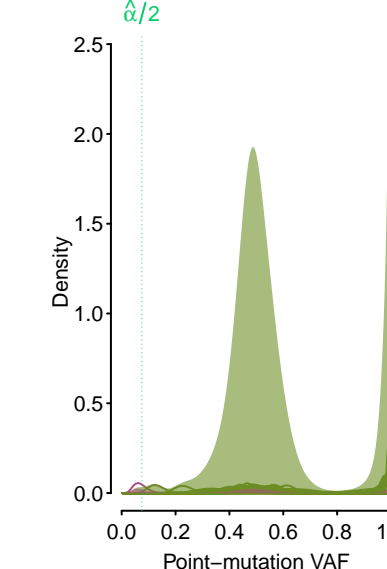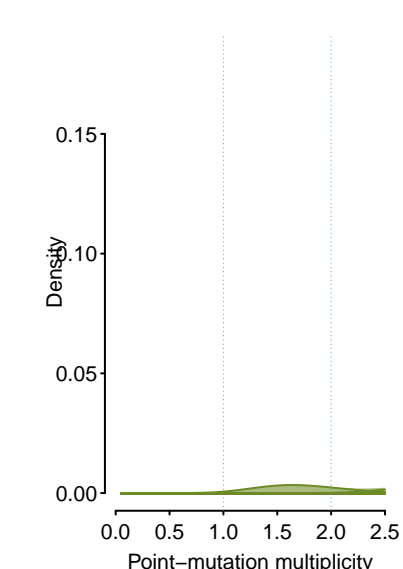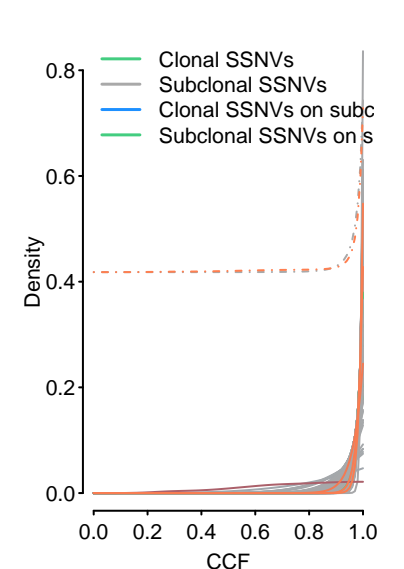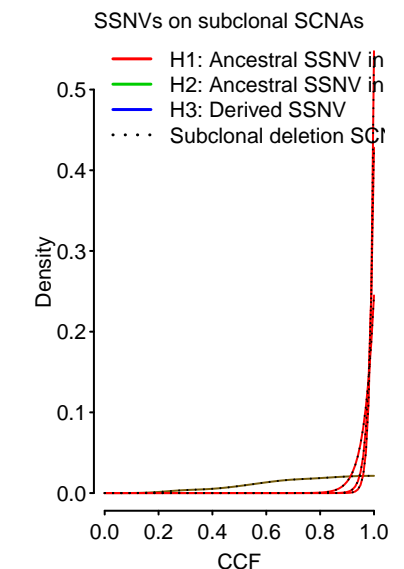

Sample 57

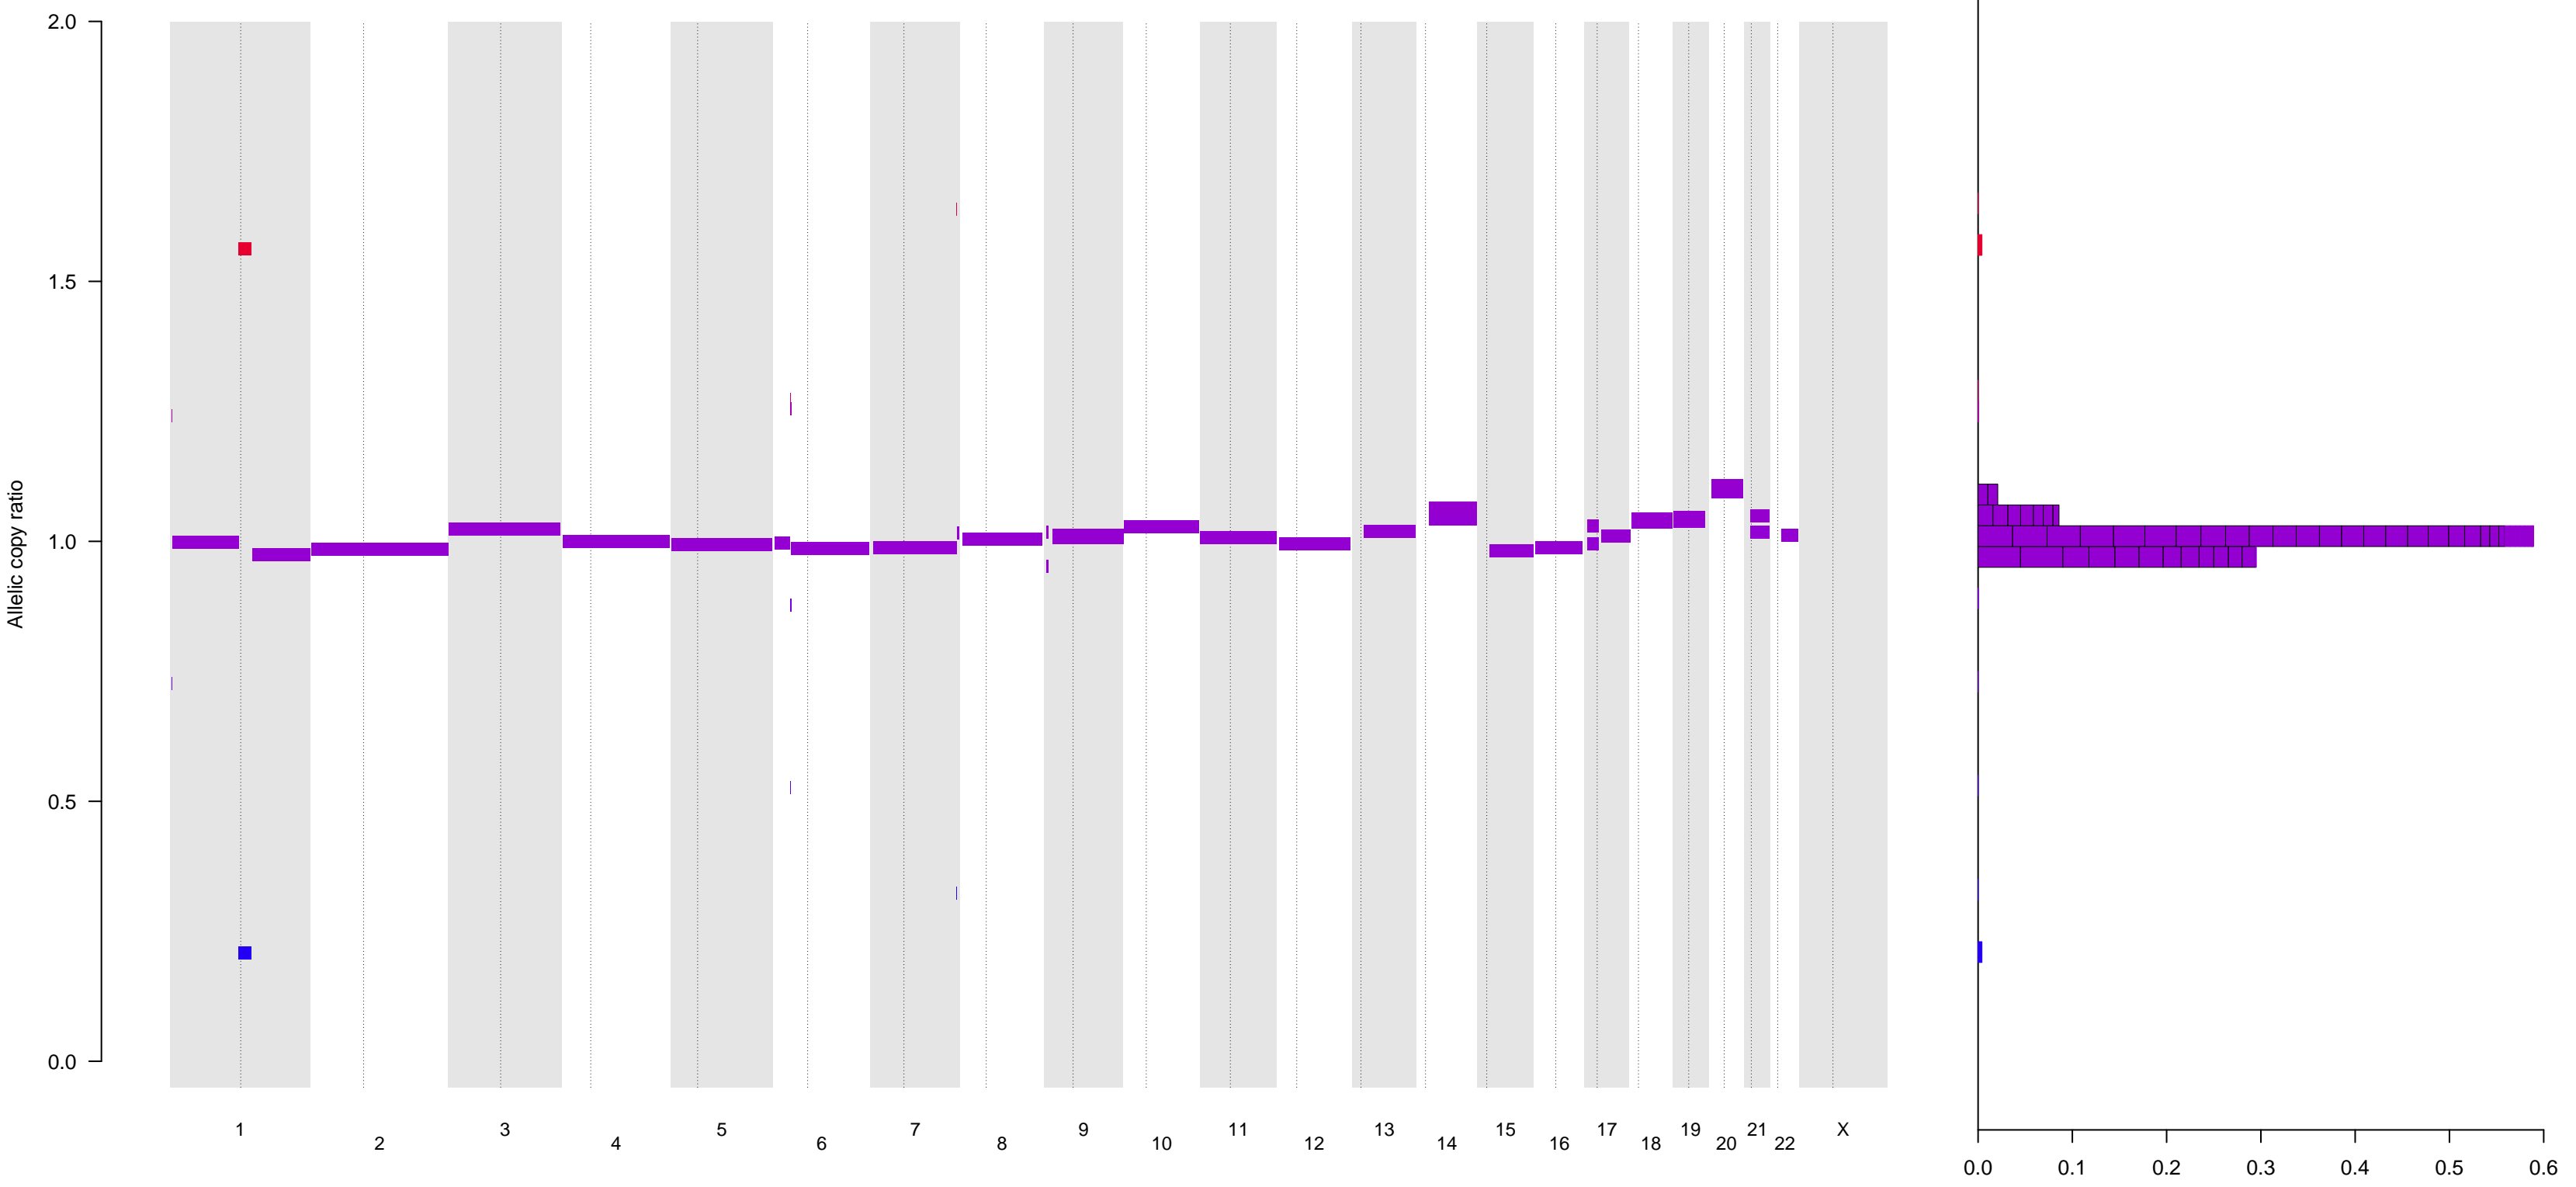

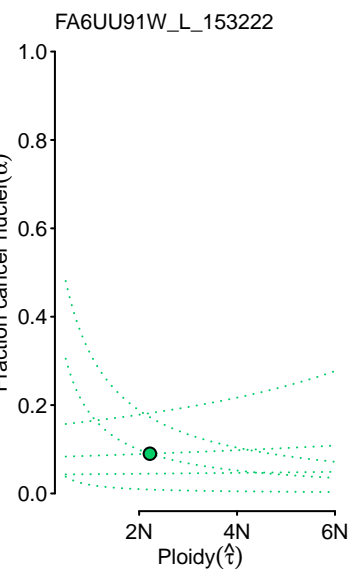

purity( $\hat{\lambda}$ ) = 0.09, ploidy:  $\hat{t} = 2.22$ ,  $\hat{t}_g = 2.22$   
 $\theta_z = 0.13$ ,  $\theta_a = 1.446$ , WGD=0  
 SCNA LL = -262.06, SSNV LL = -14017.59, SCNA Ev = -87.45129

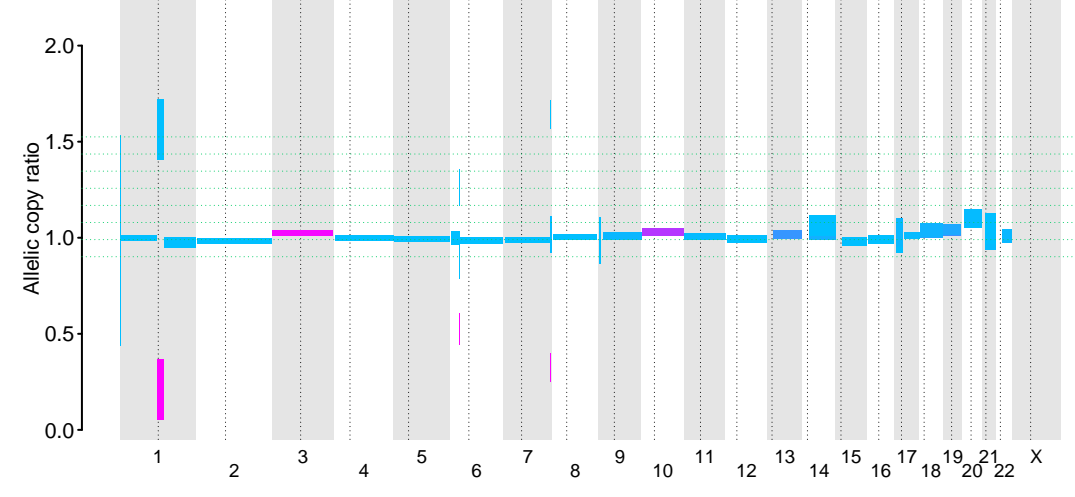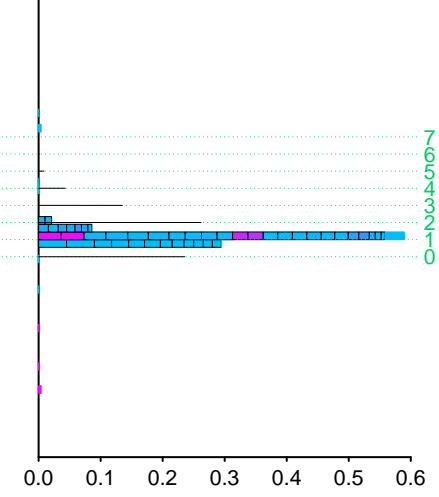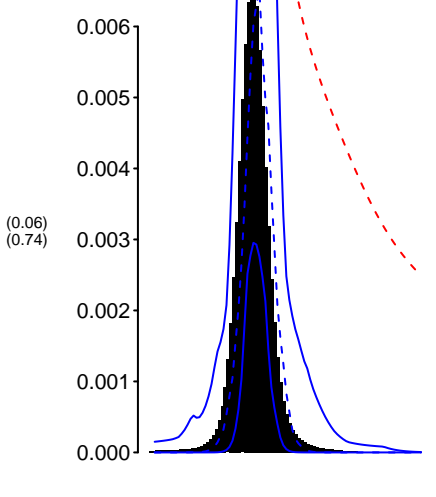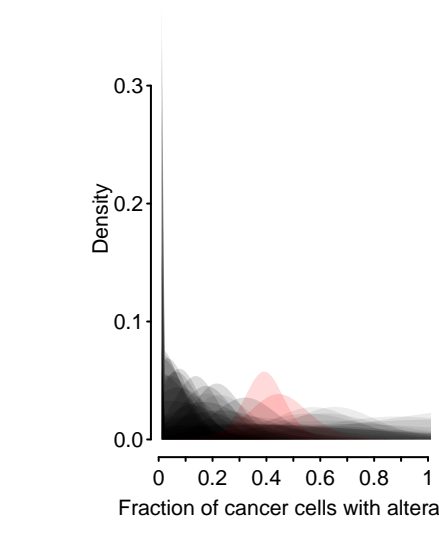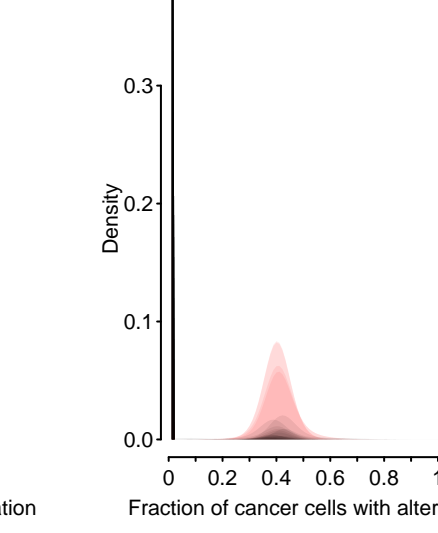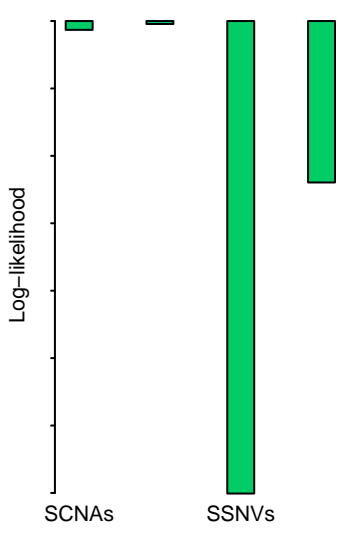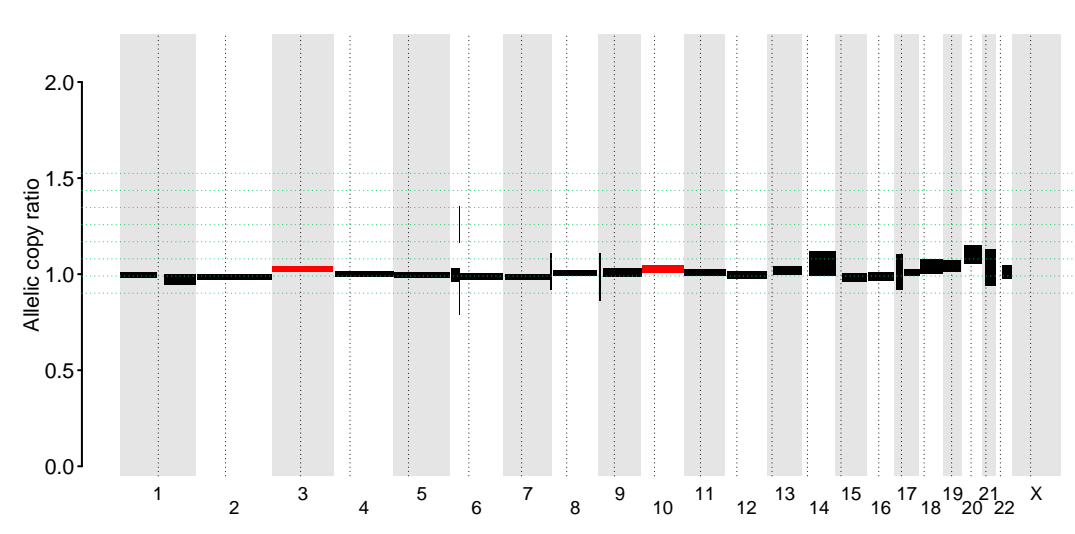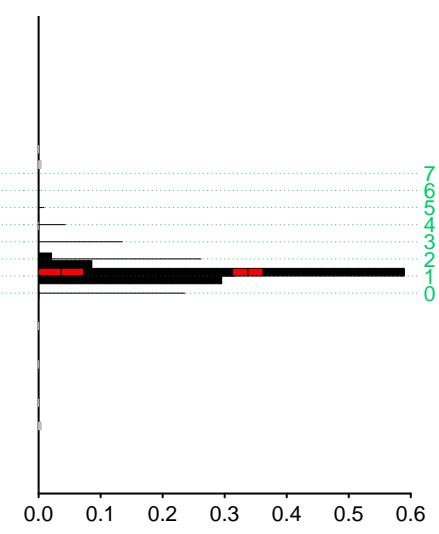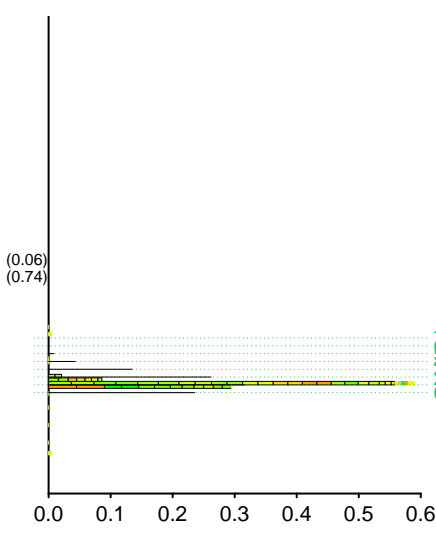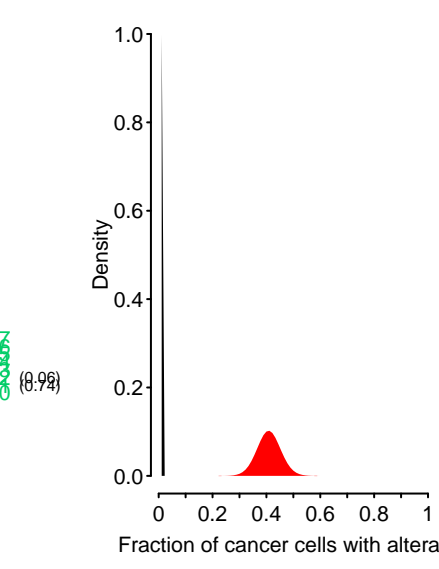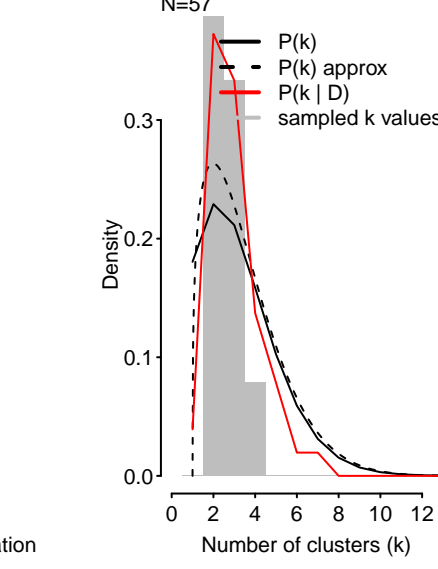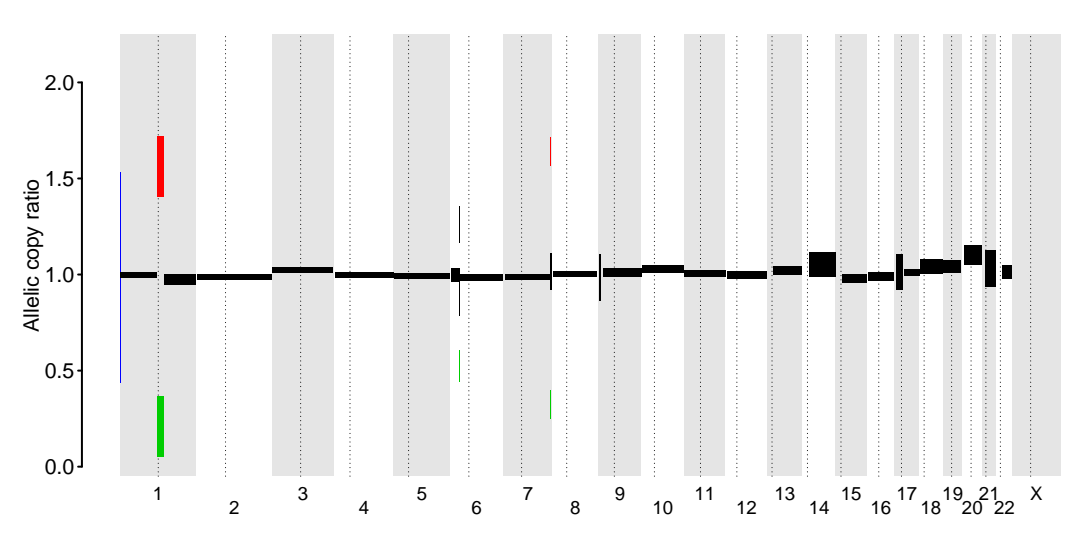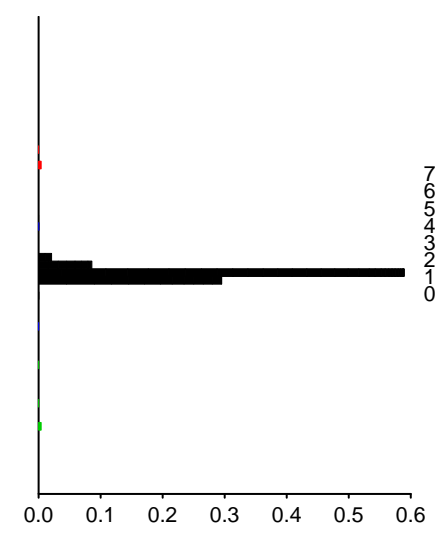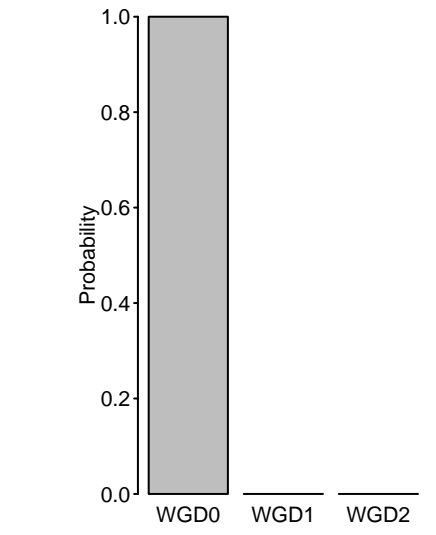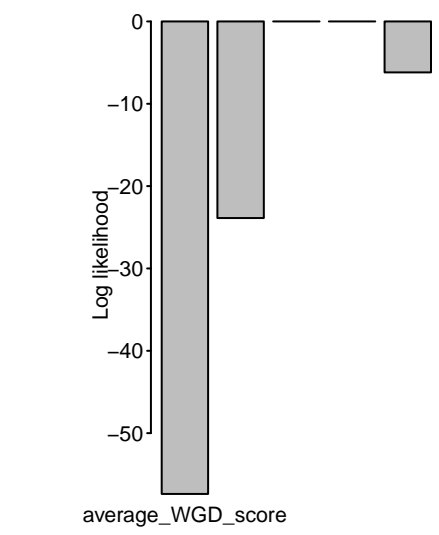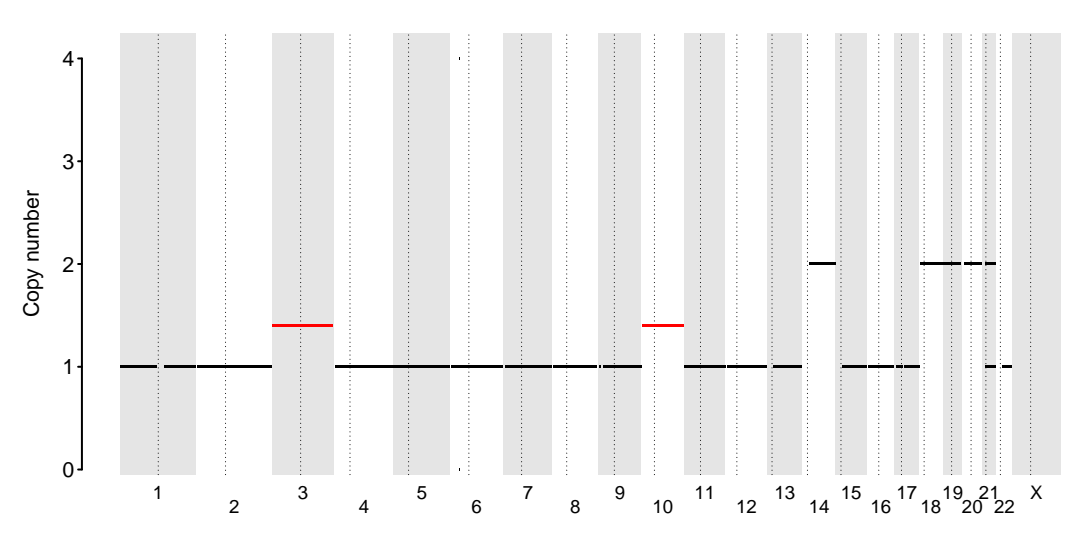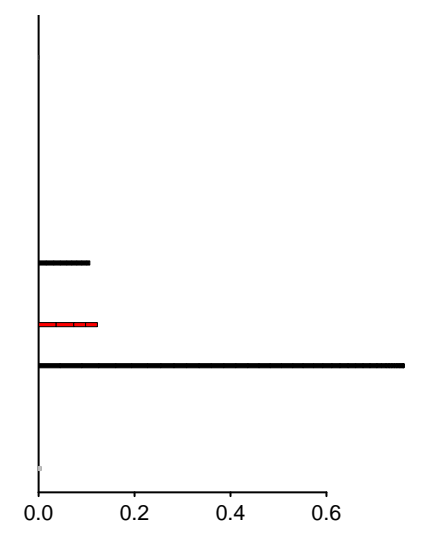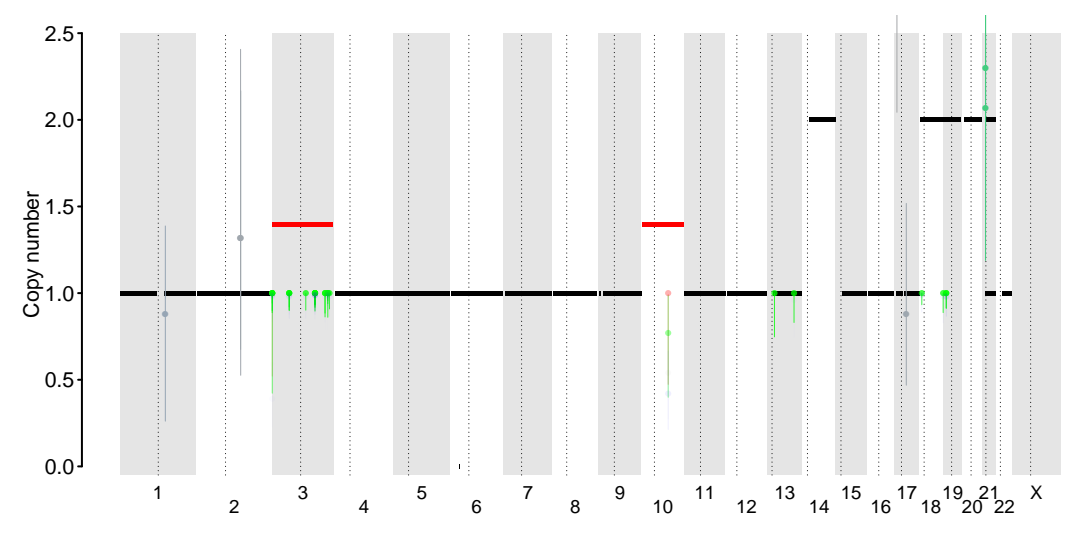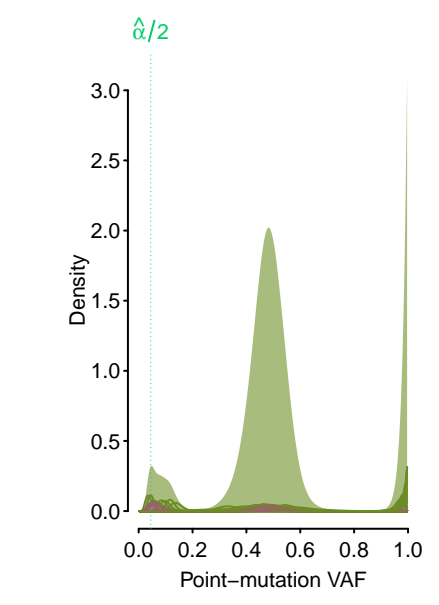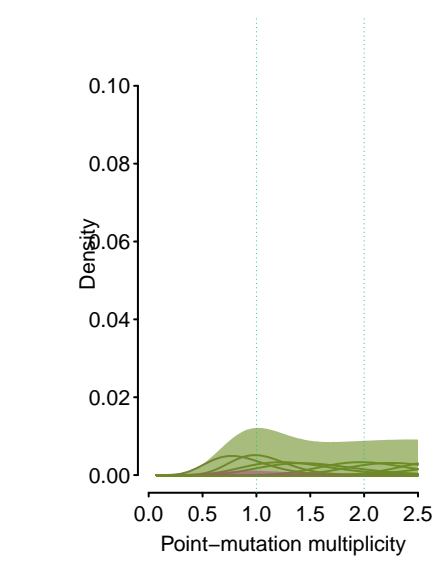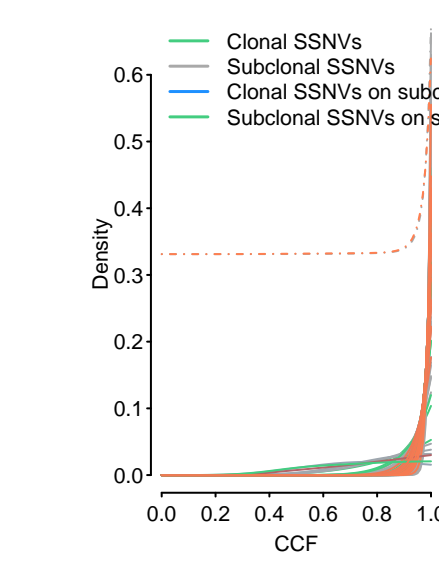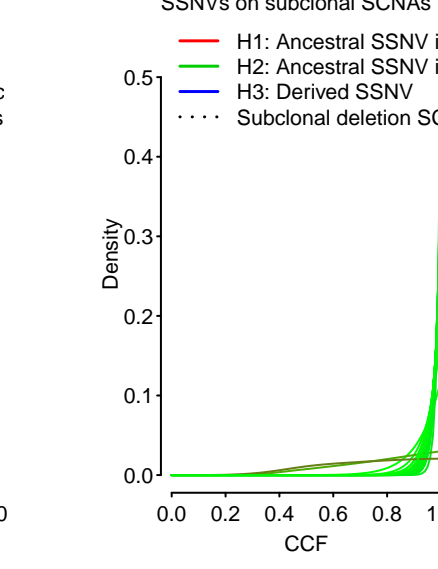

Sample 58

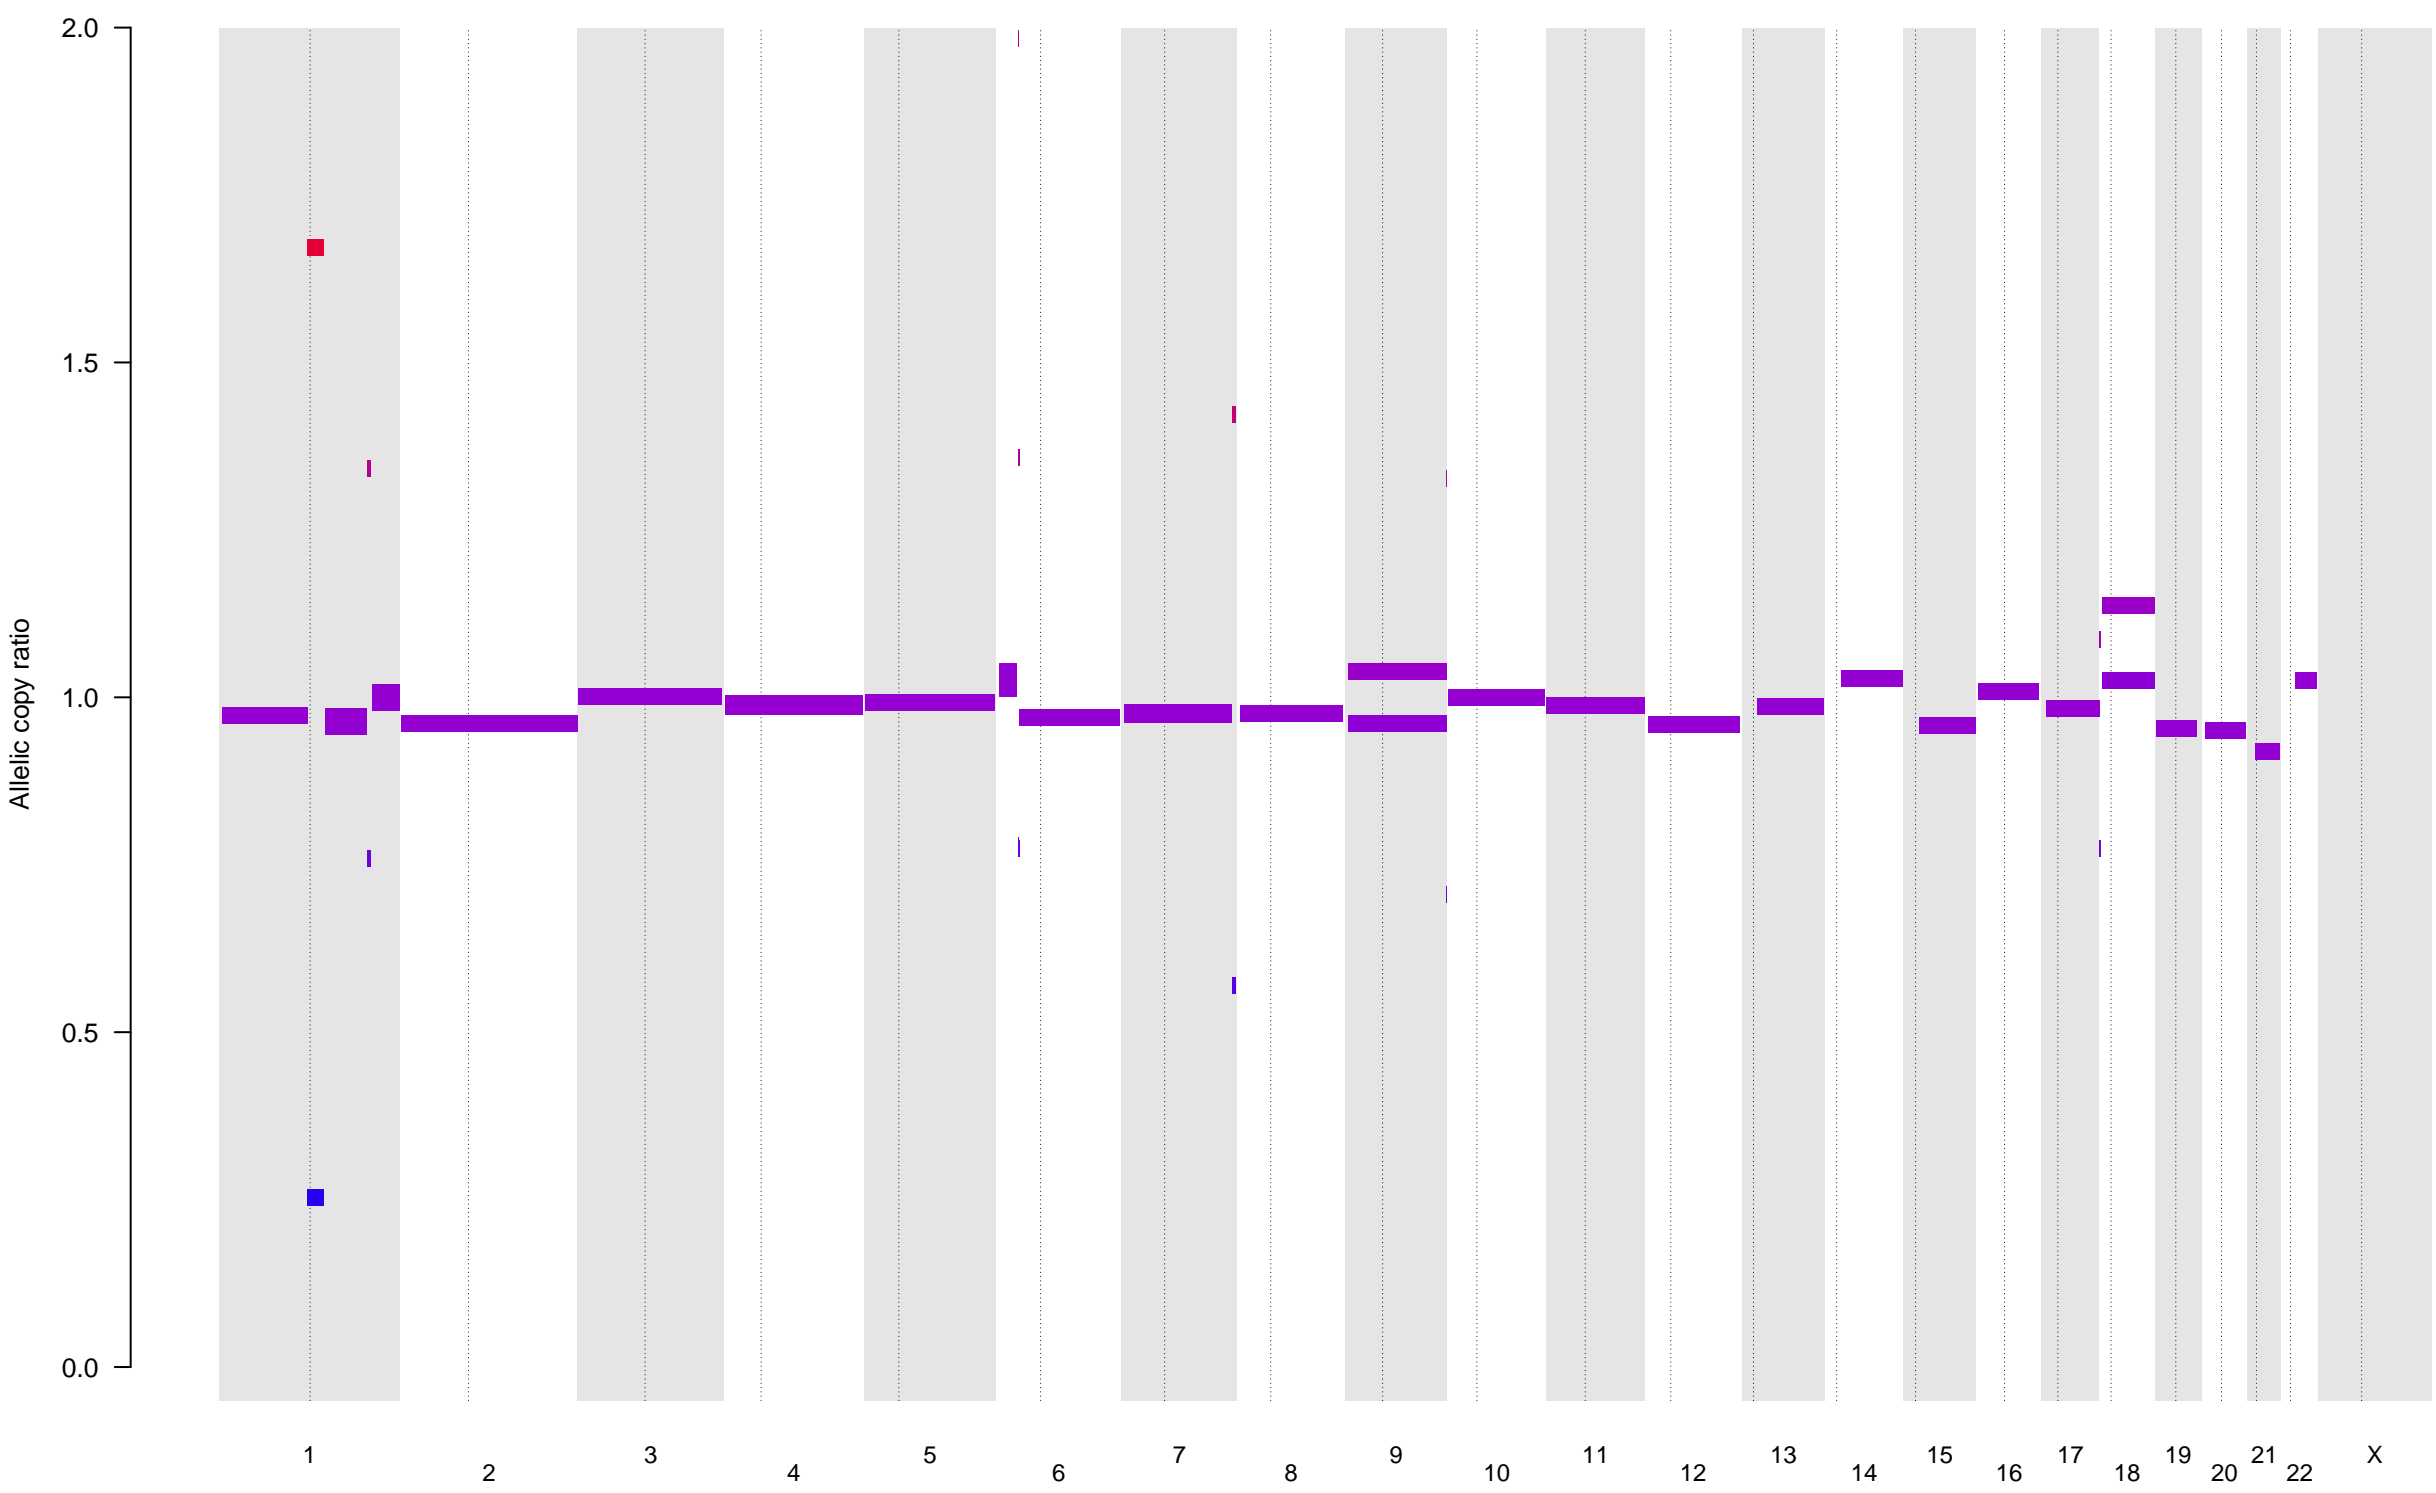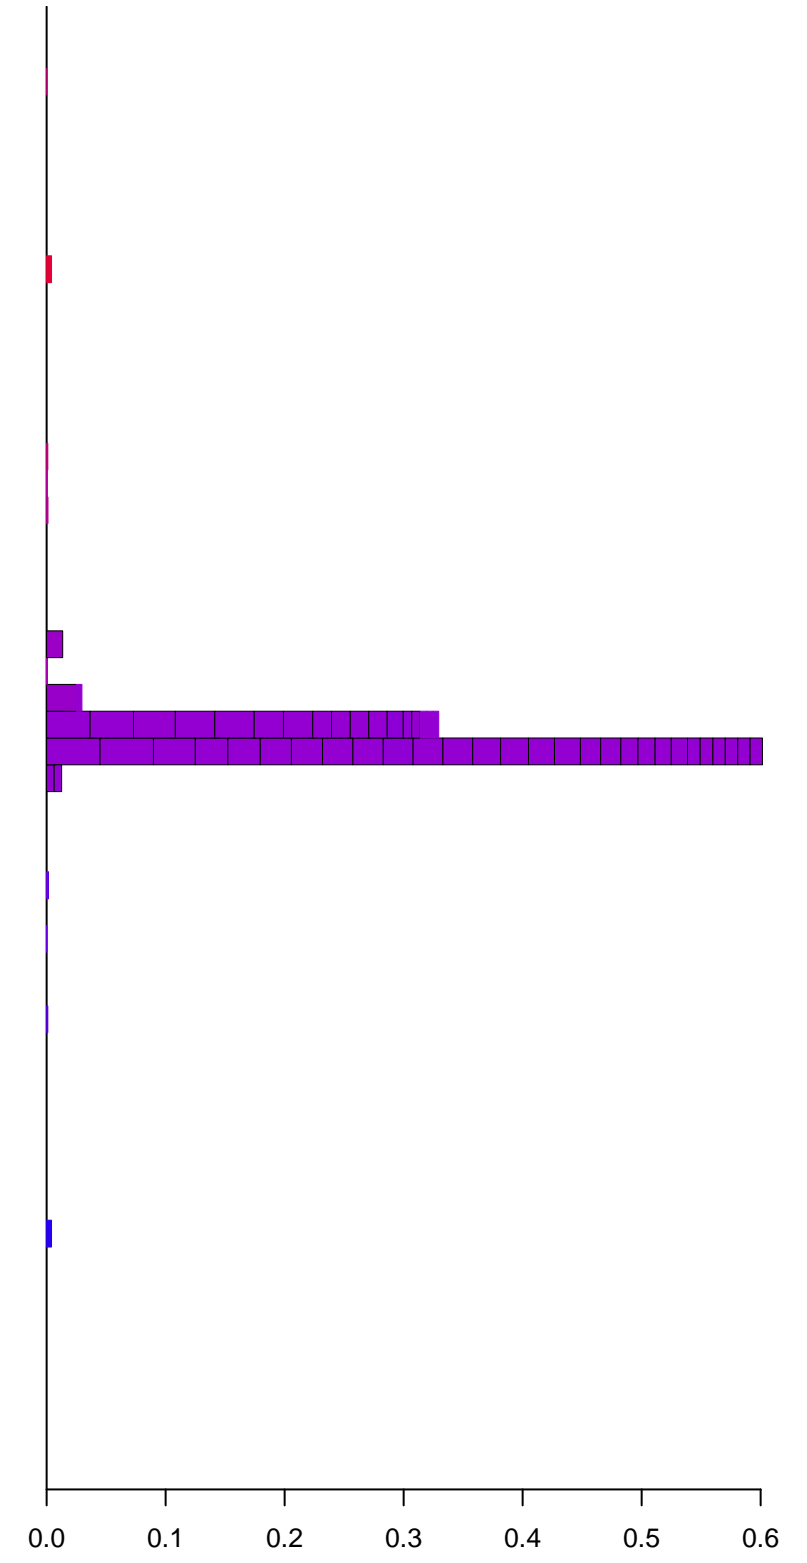

purity( $\hat{\alpha}$ ) = 0.18, ploidy:  $\hat{t} = 2.23$ ,  $\hat{t}_g = 2.06$   
 $\theta_z = 0.01$ ,  $\theta_a = 1.767$ , WGD=0  
 SCNA LL = -243.66, SSNV LL = -7376.86, SCNA Ev = -33.51143

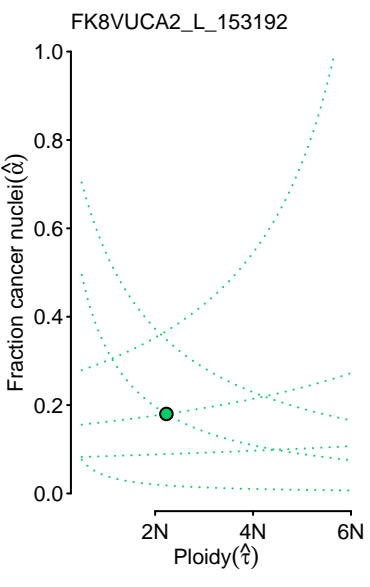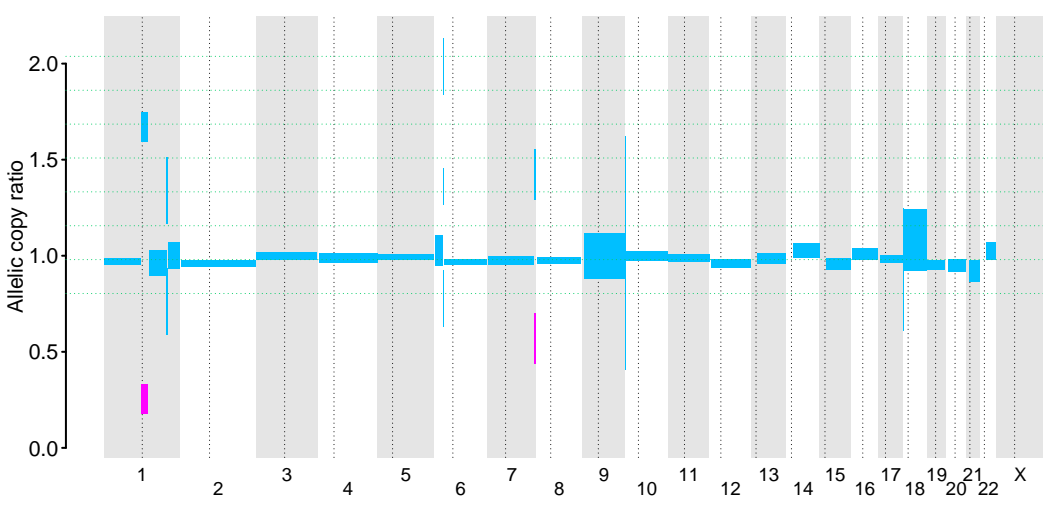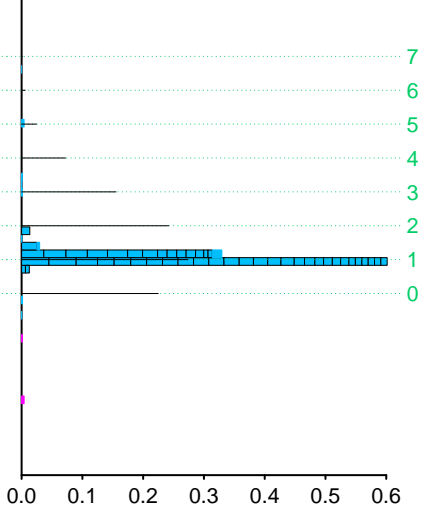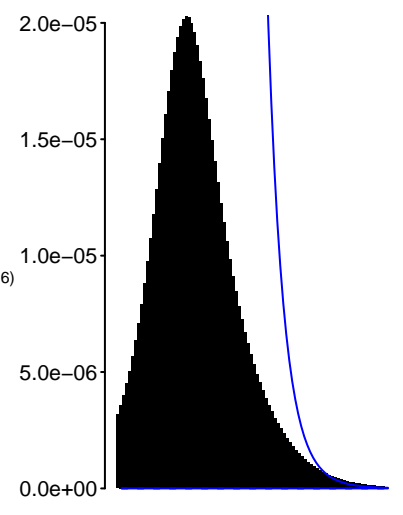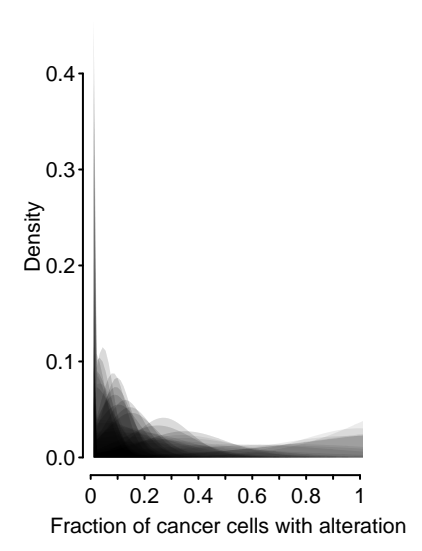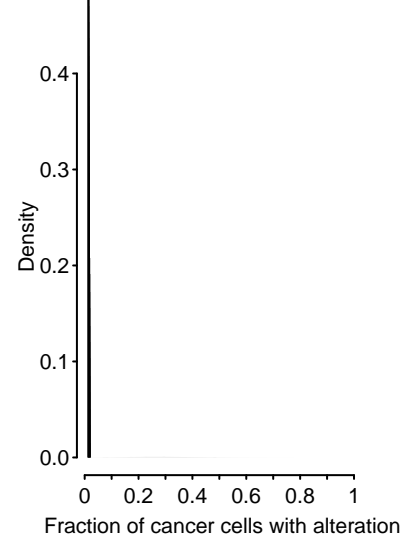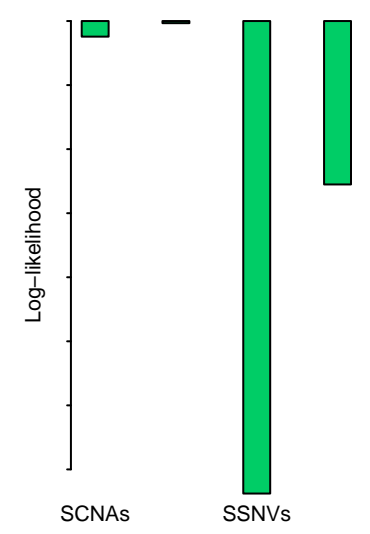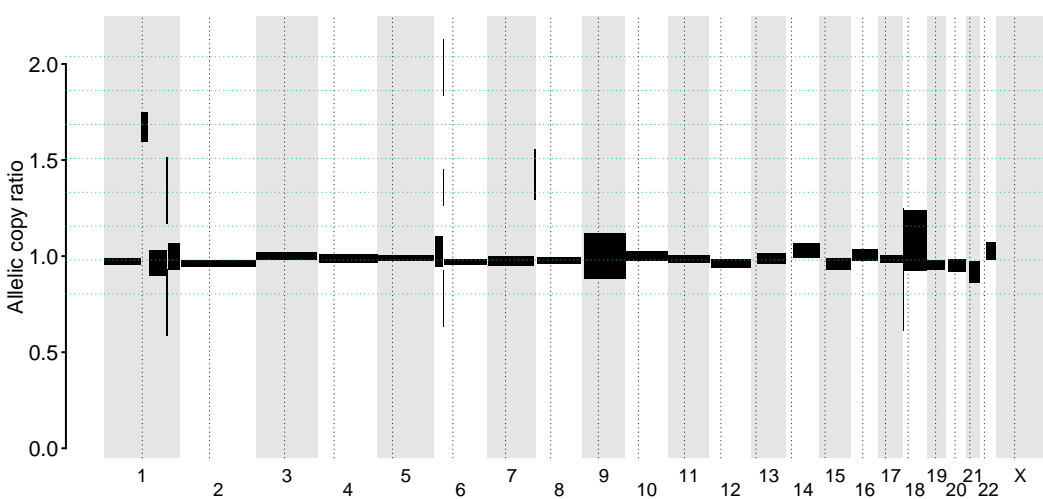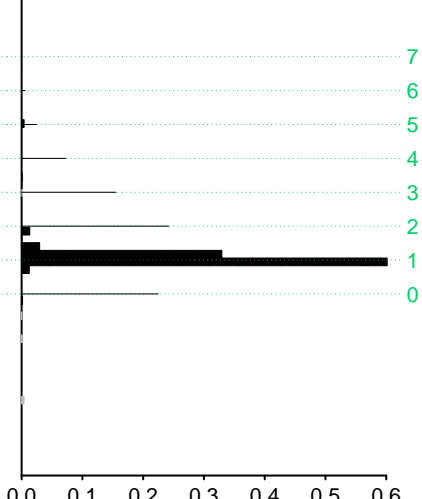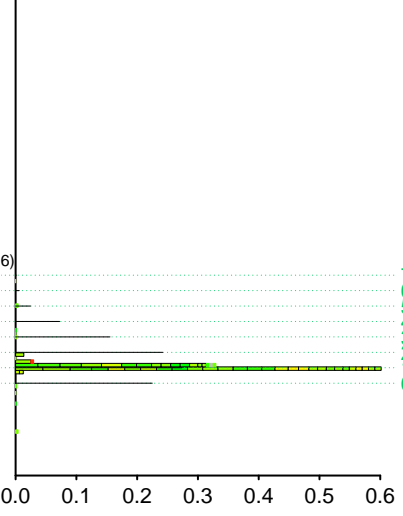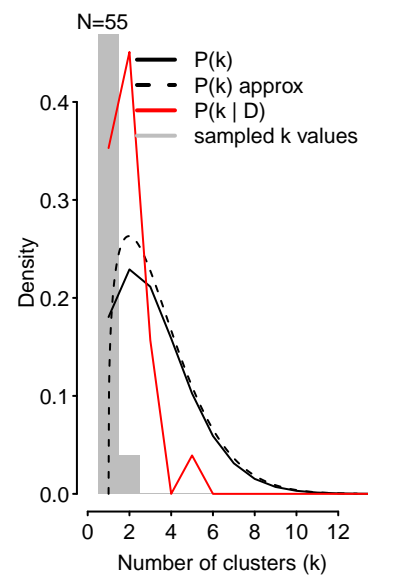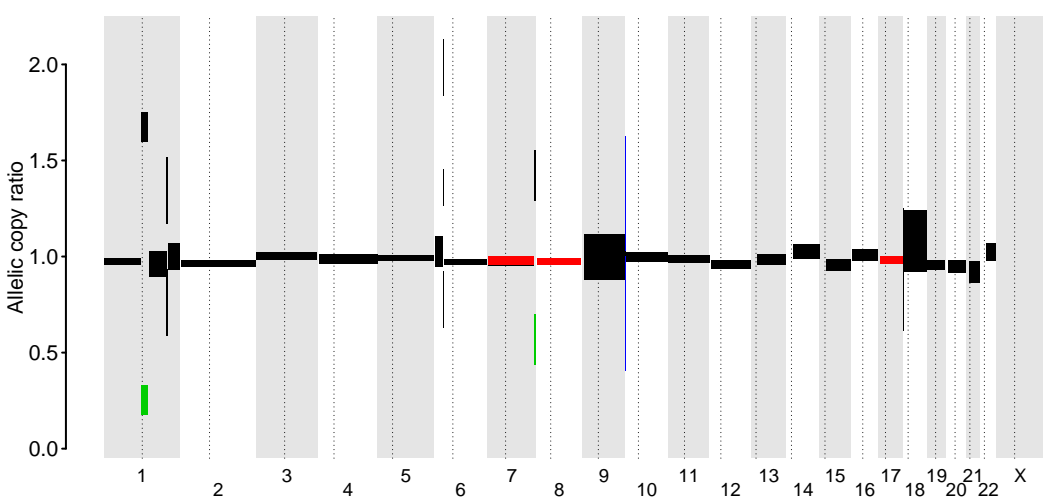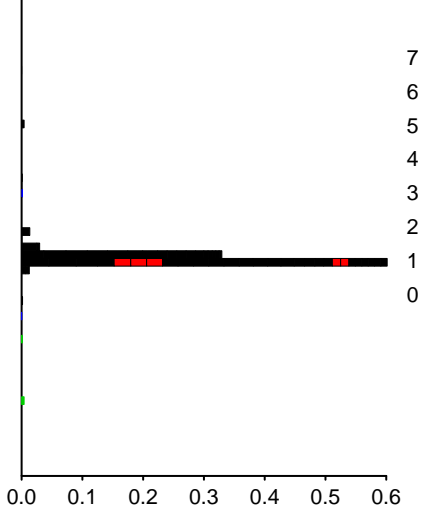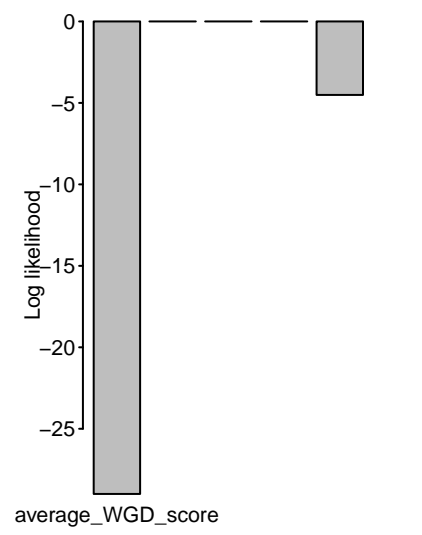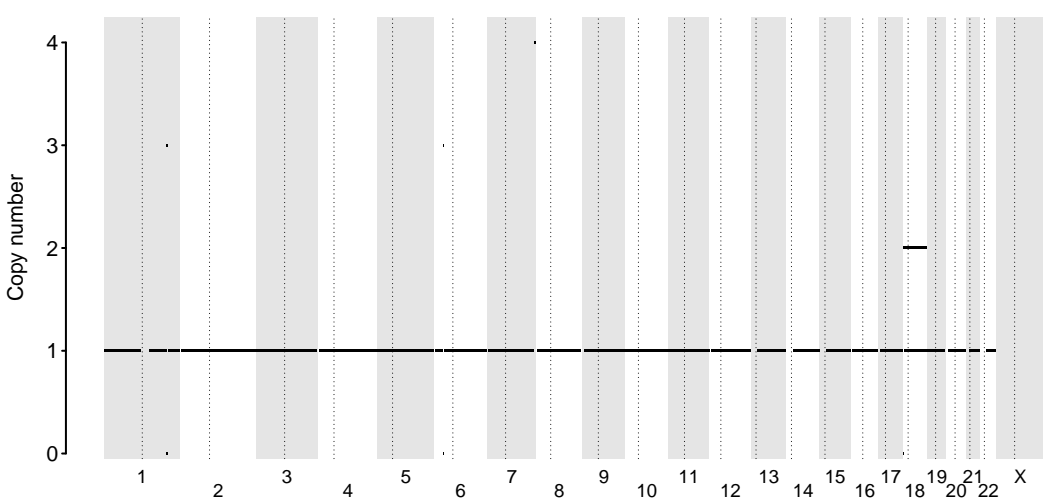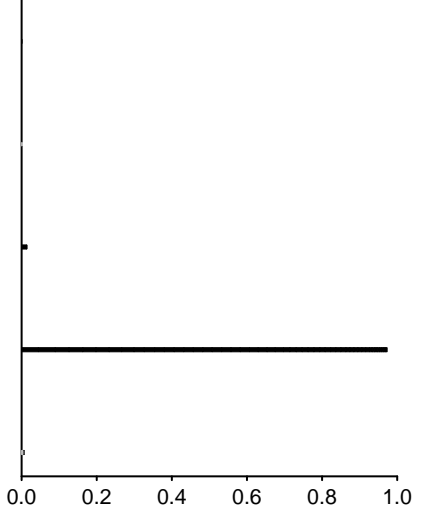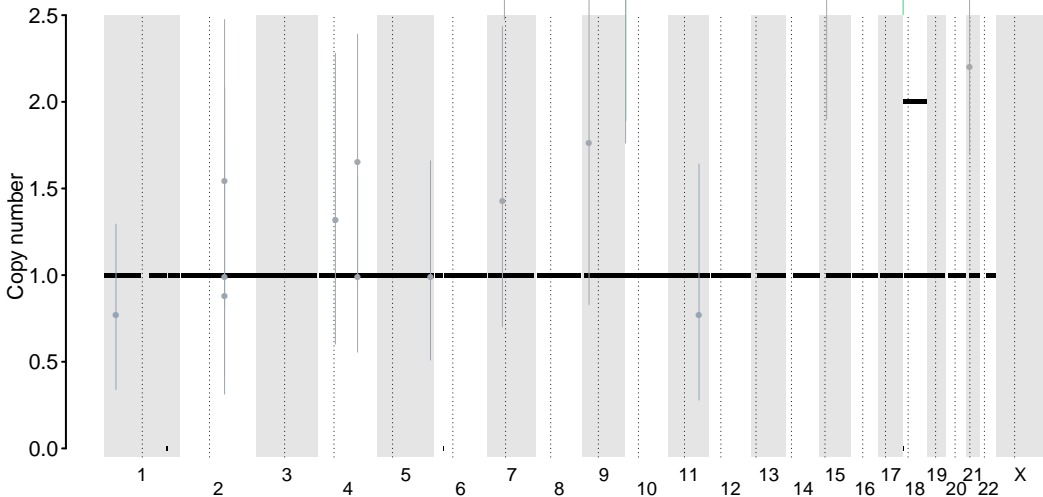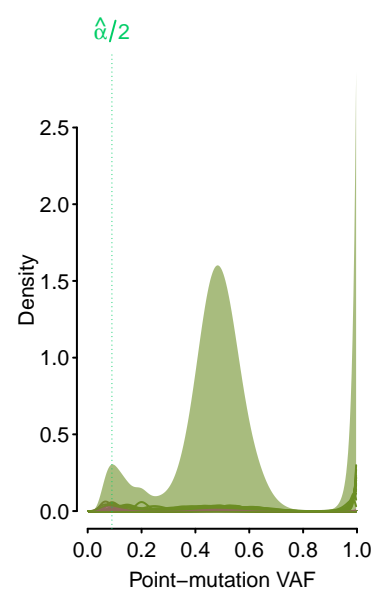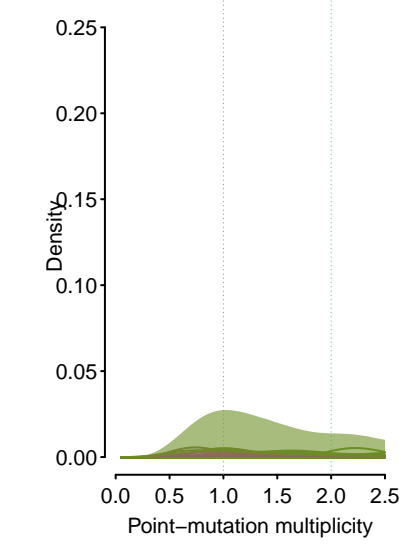

Sample 59

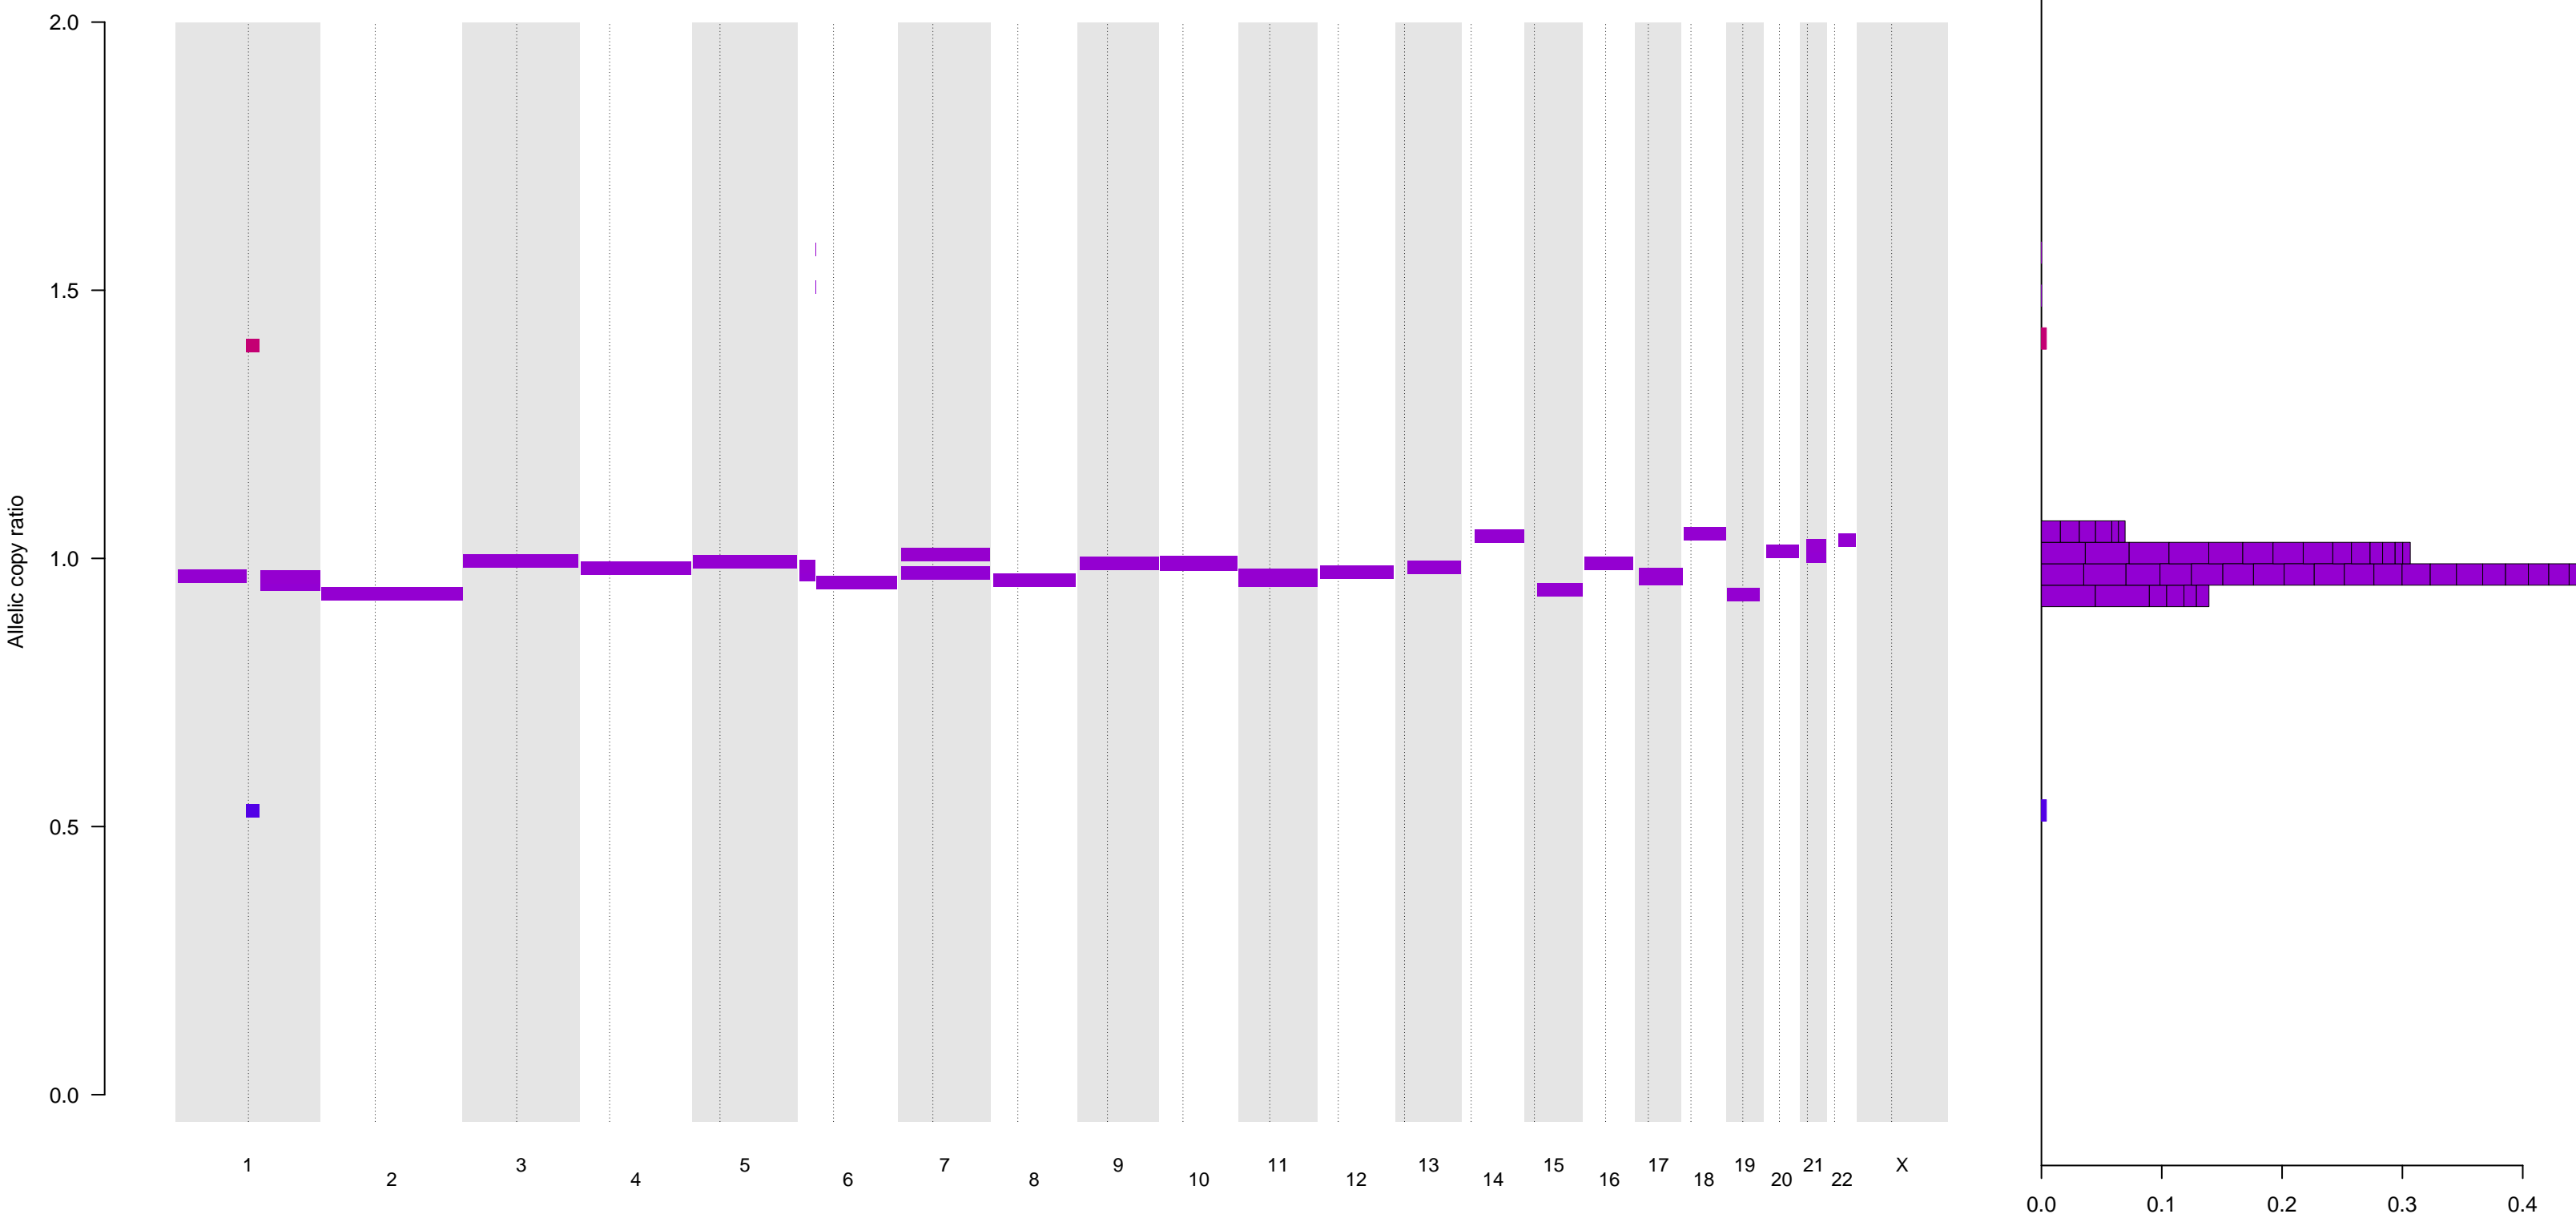



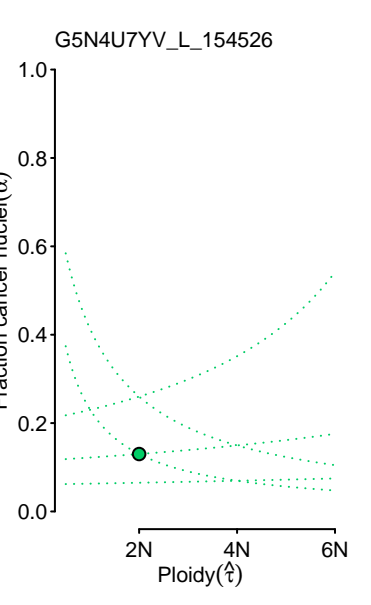

purity( $\hat{\lambda}$ ) = 0.13, ploidy:  $\hat{\lambda} = 2$ ,  $\hat{\lambda}_0 = 1.88$   
 $\theta_z = 0.34$ ,  $\theta_a = 1.72$ , WGD=0  
 SCNA LL = -257.9, SSNV LL = -4694.94, SCNA Ev = -105.2603

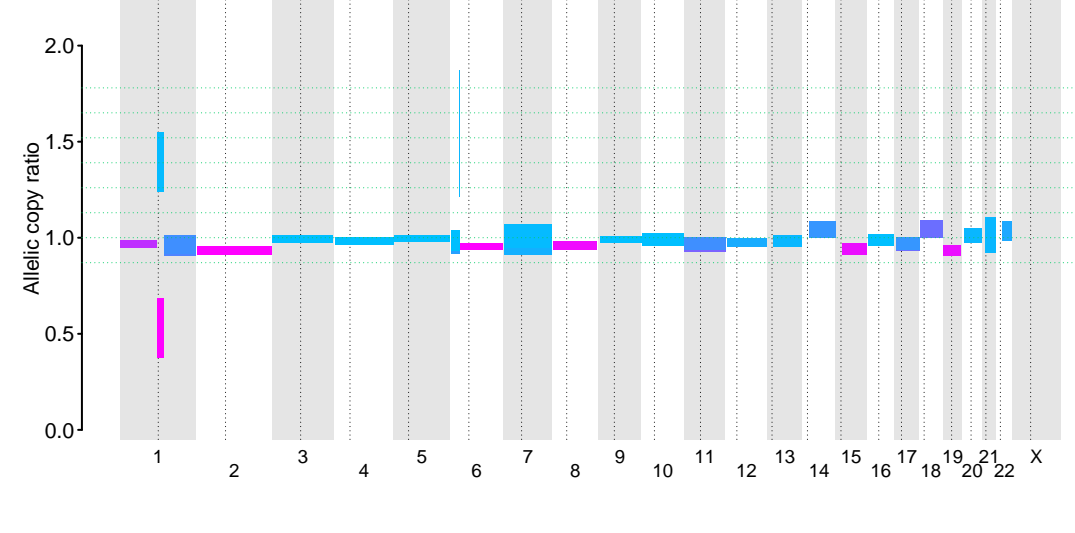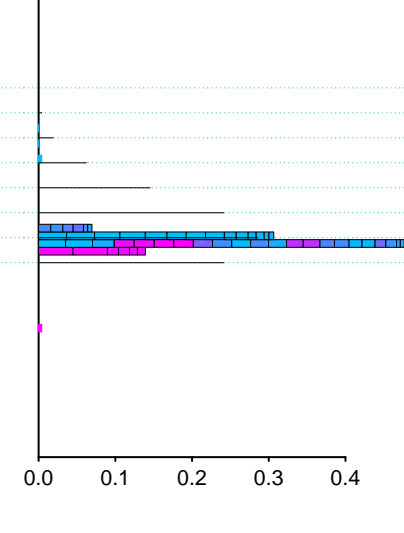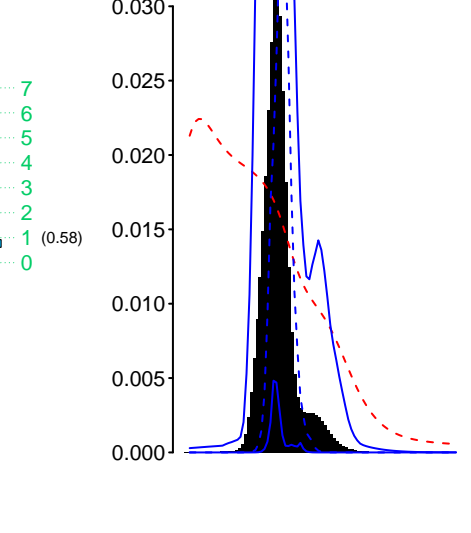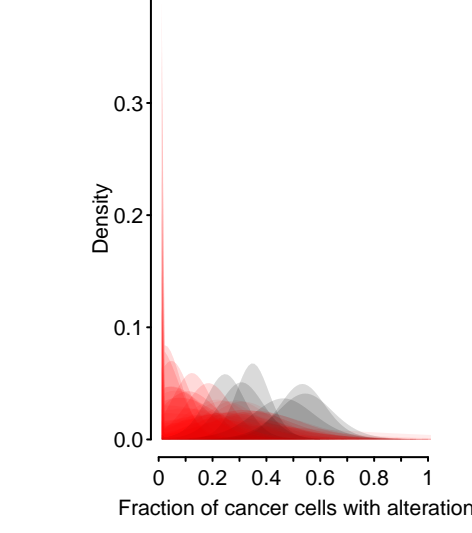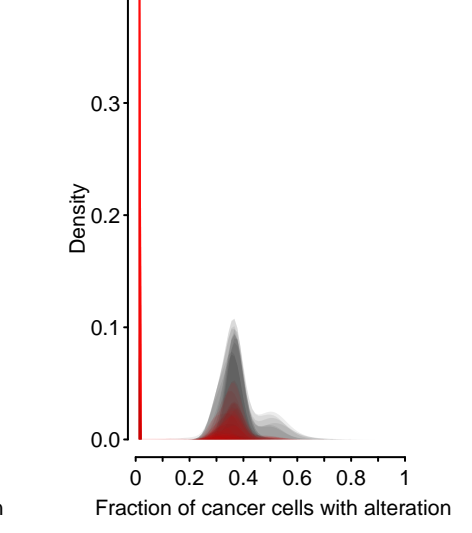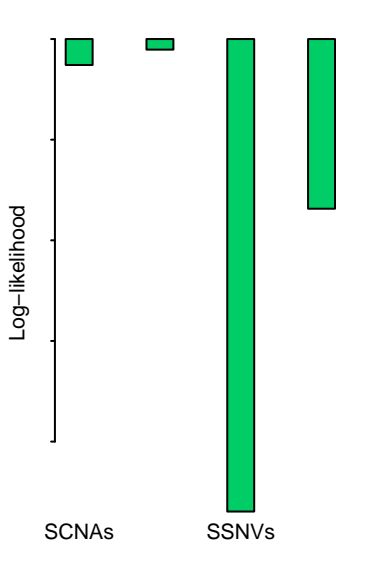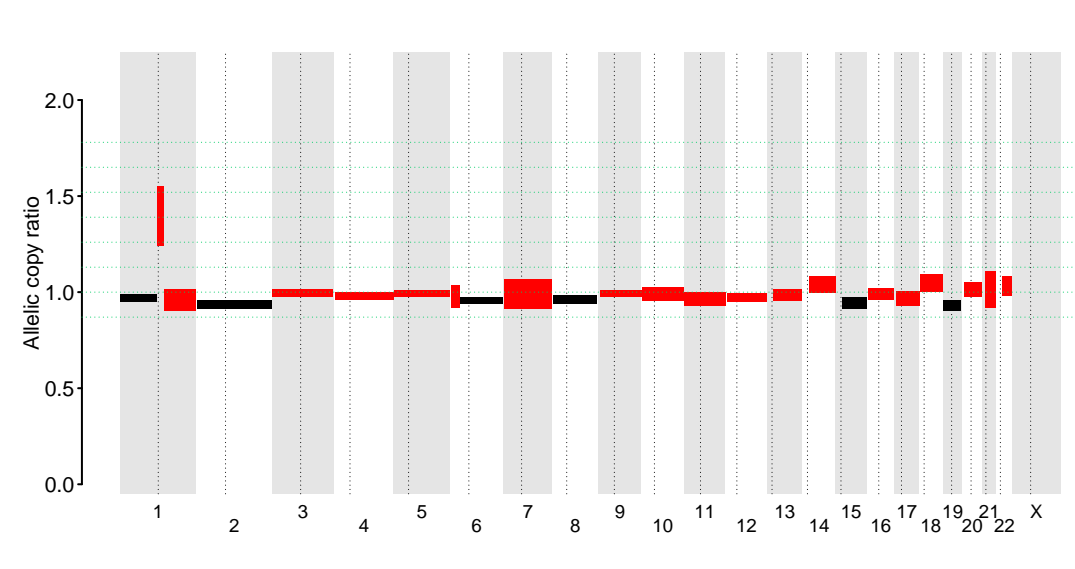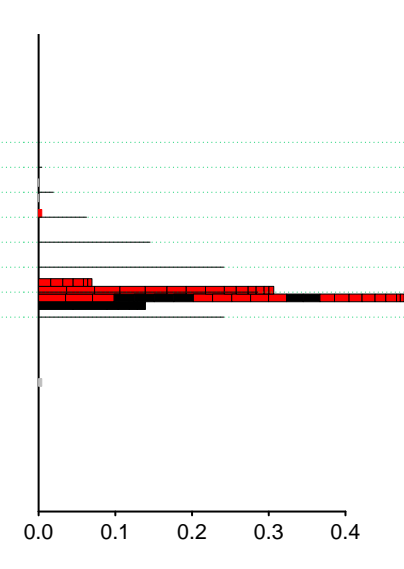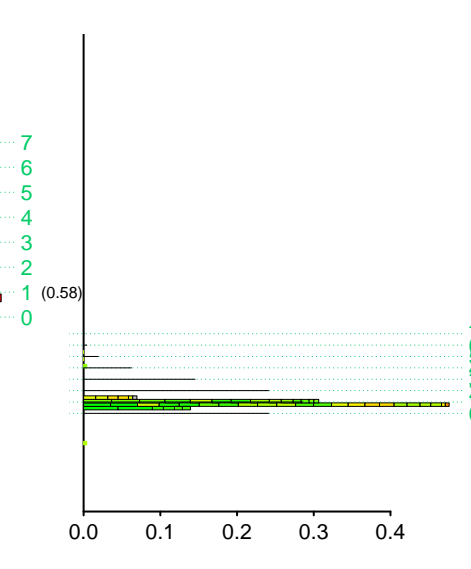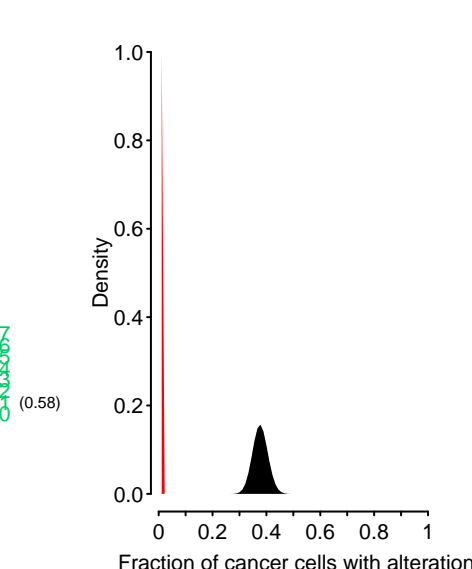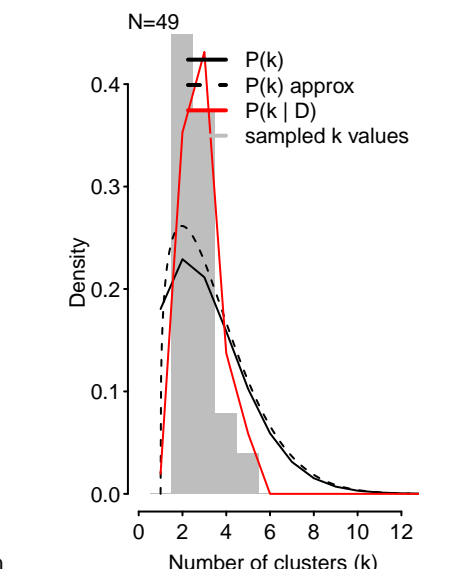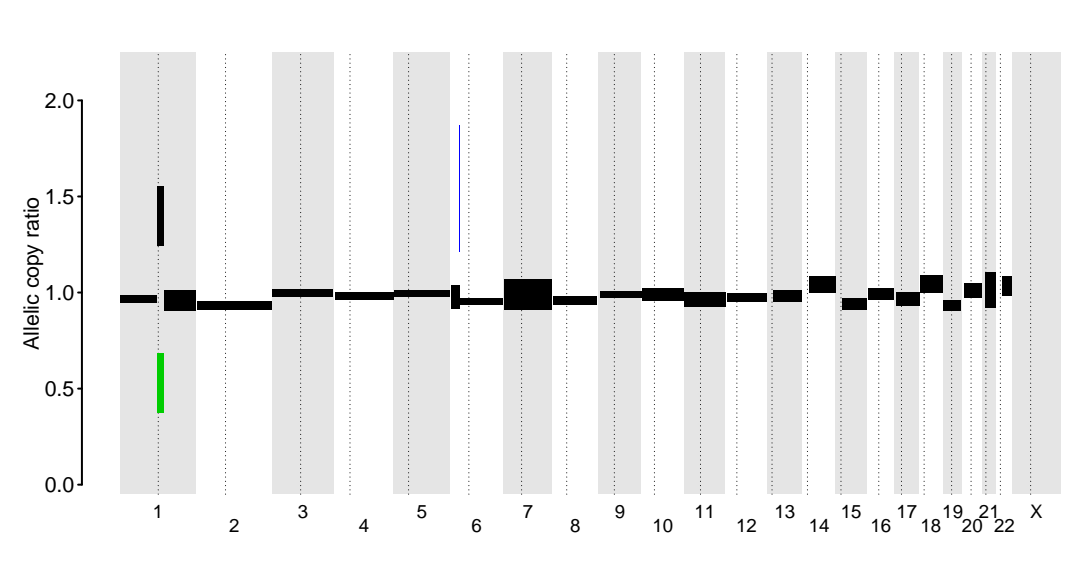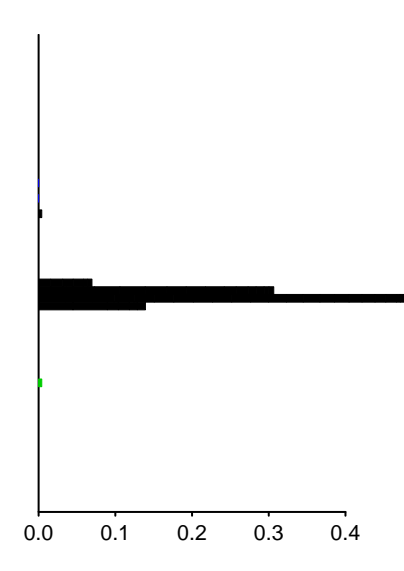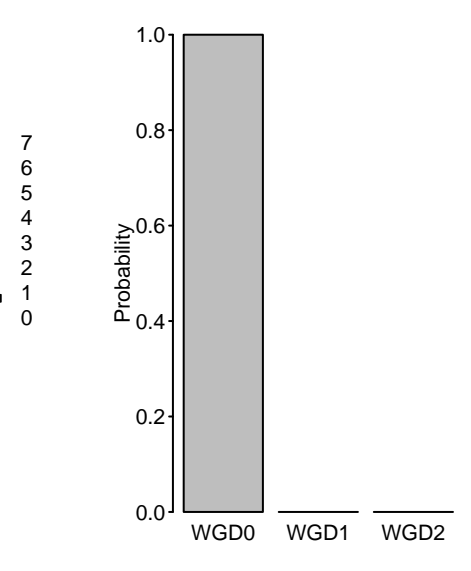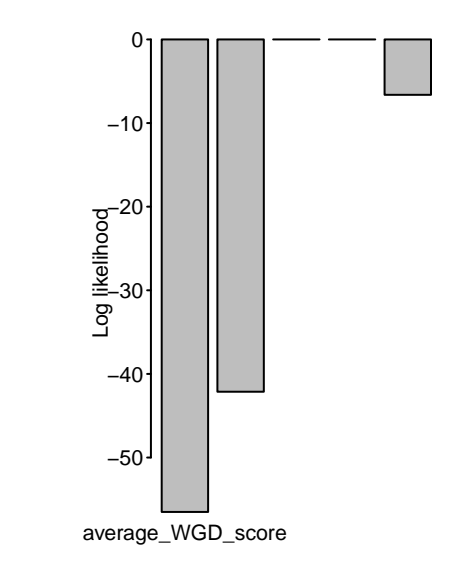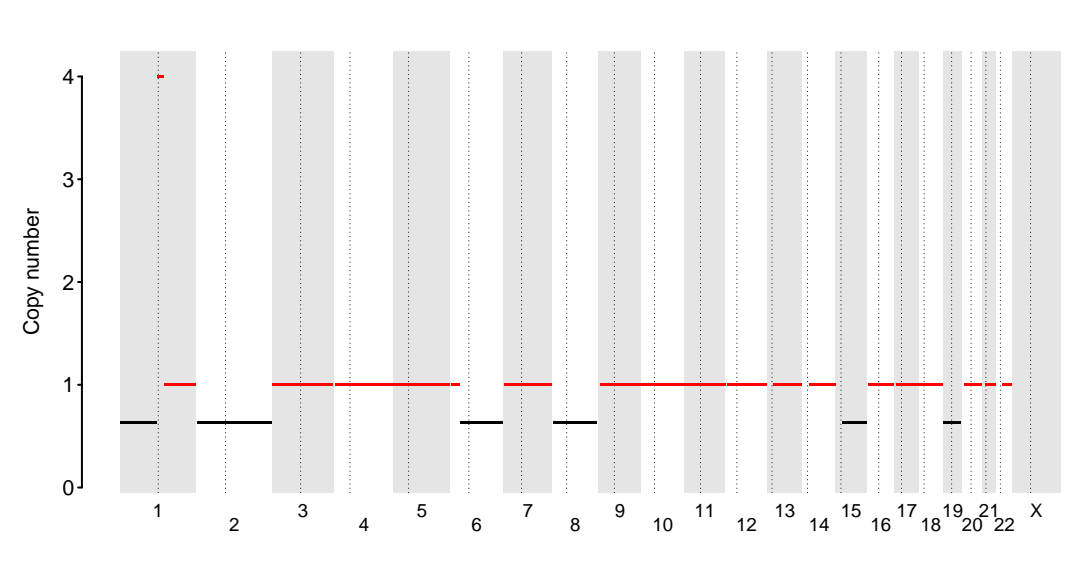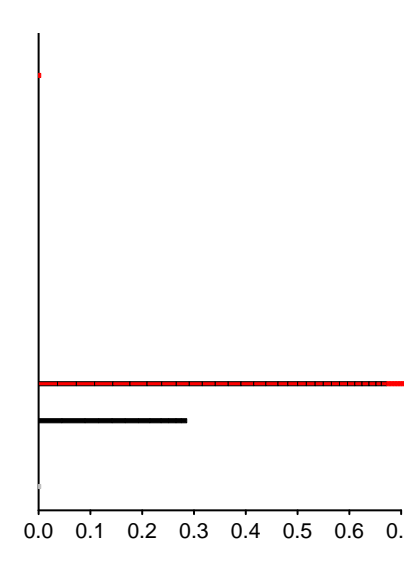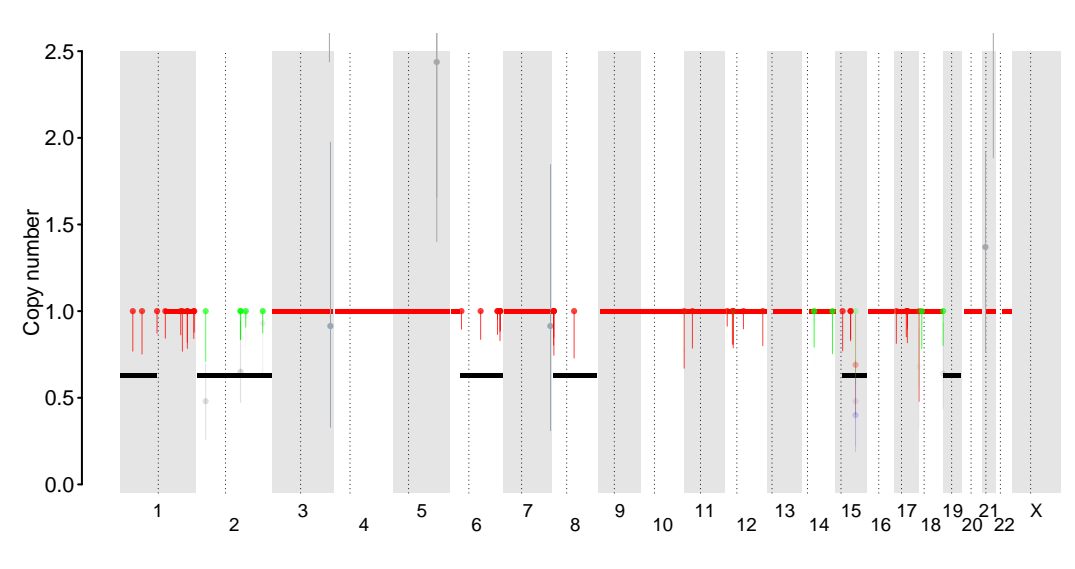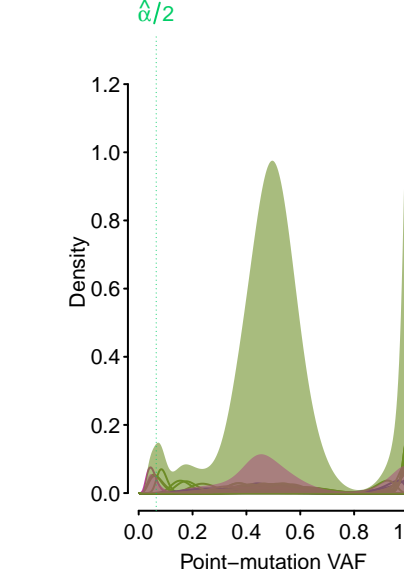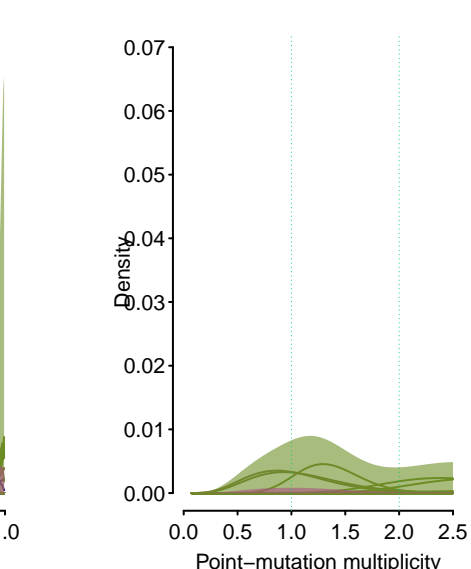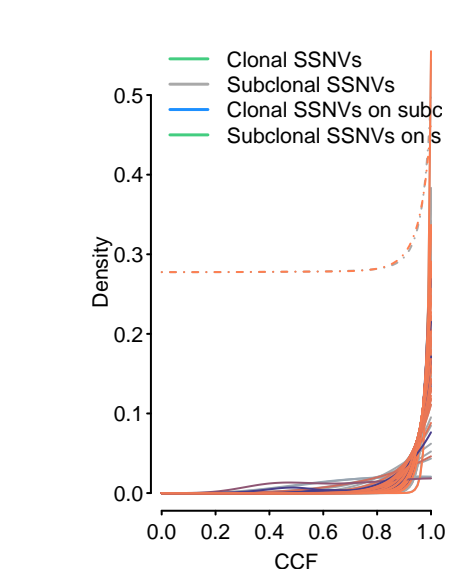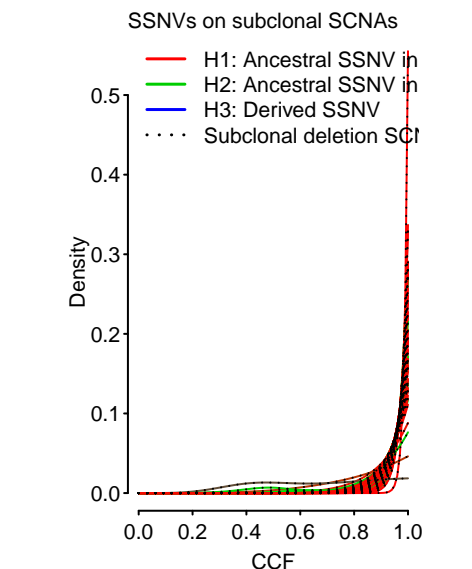



Sample 61

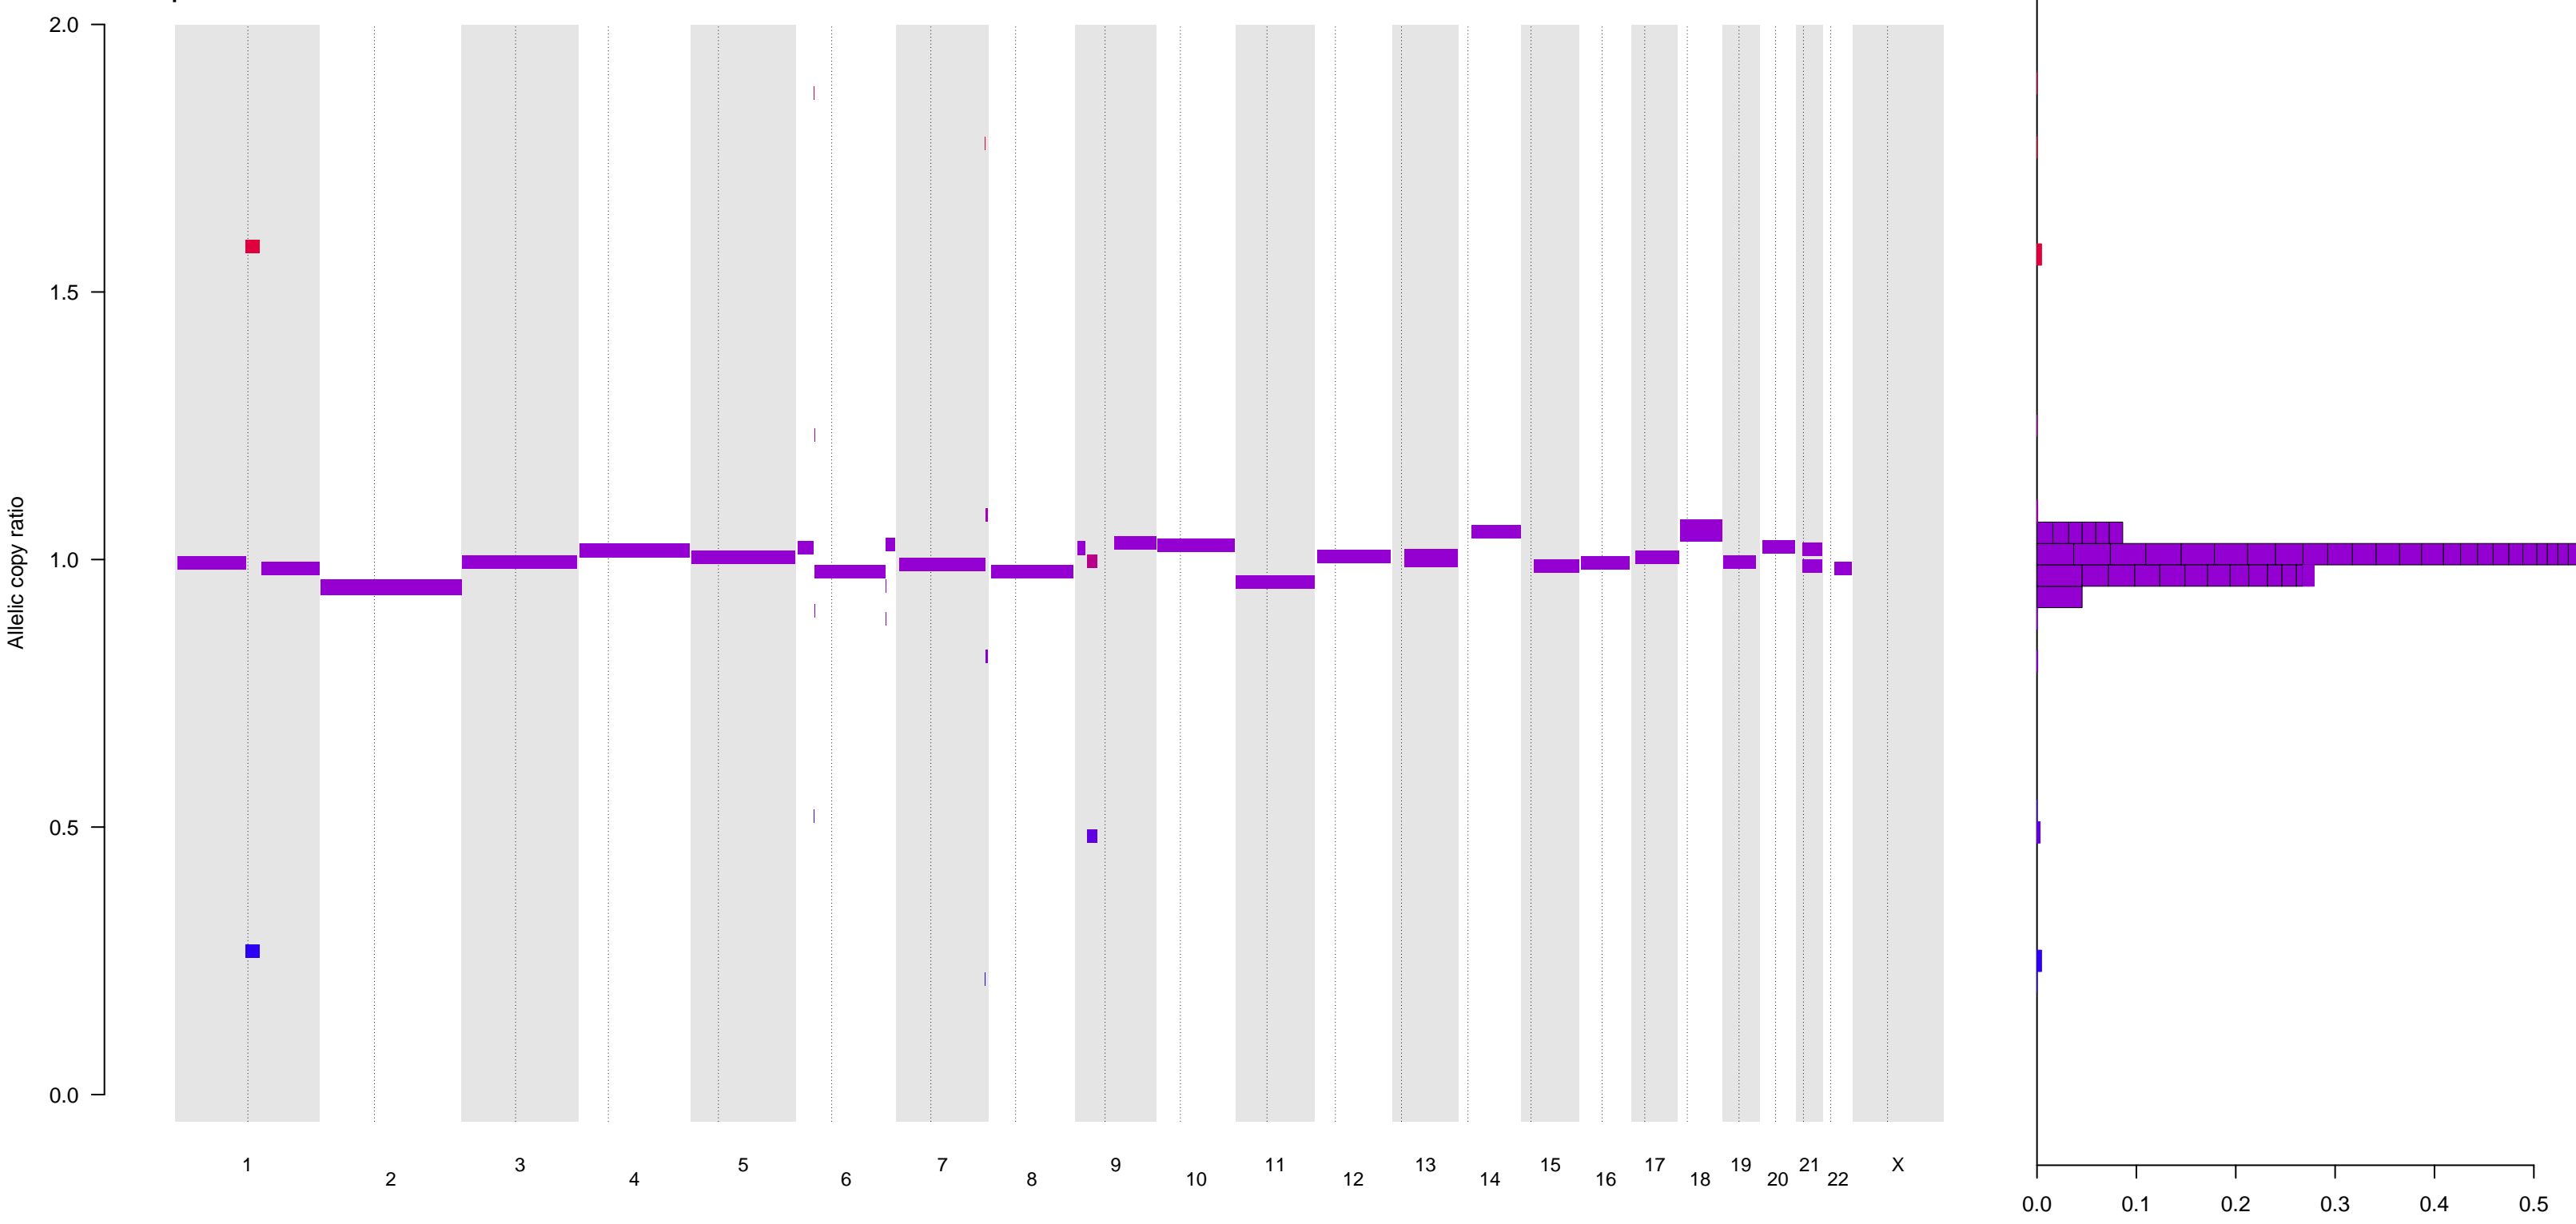

purity( $\hat{\alpha}$ ) = 0.5, ploidy:  $\hat{t} = 2.01$ ,  $\hat{t}_g = 1.99$   
 $\hat{\theta}_z = 0$ ,  $\hat{\theta}_0 = 1.252$ , WGD=0  
 SCNA LL = -186.28, SSNV LL = -4714.59, SCNA Ev = -32.95284

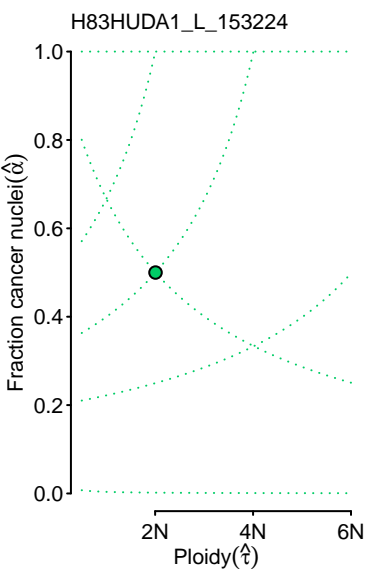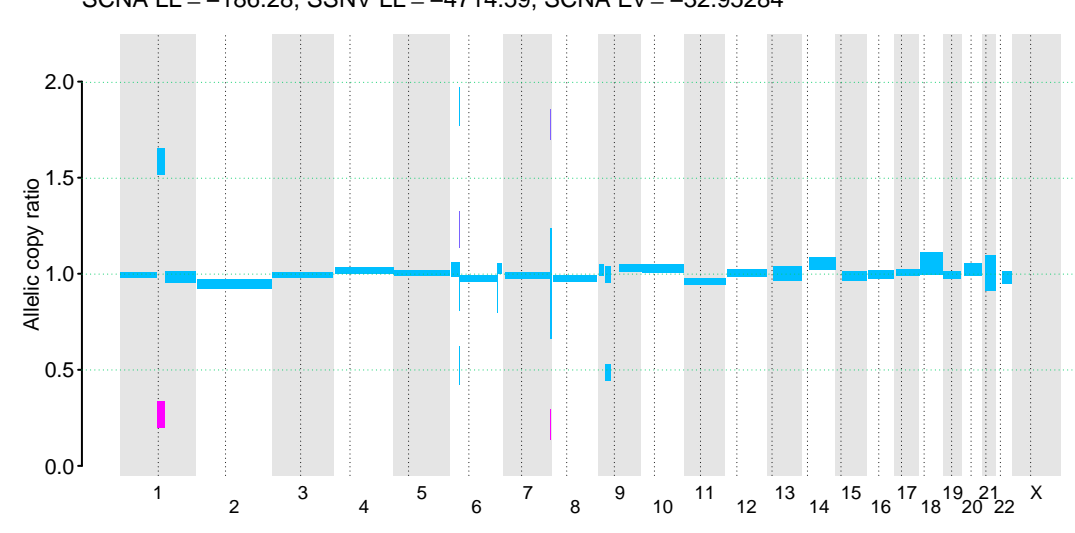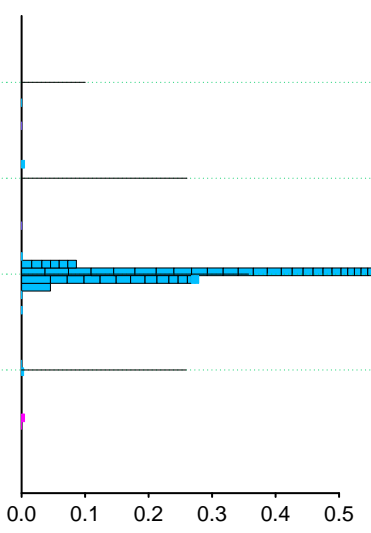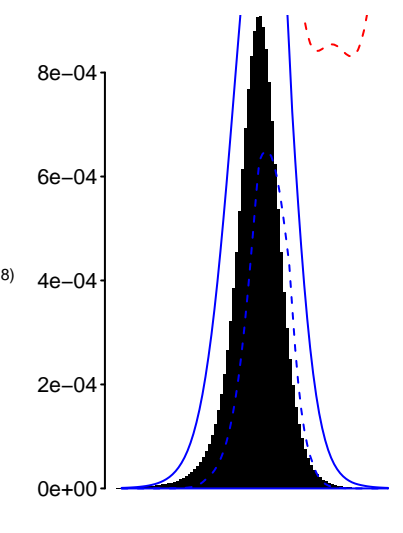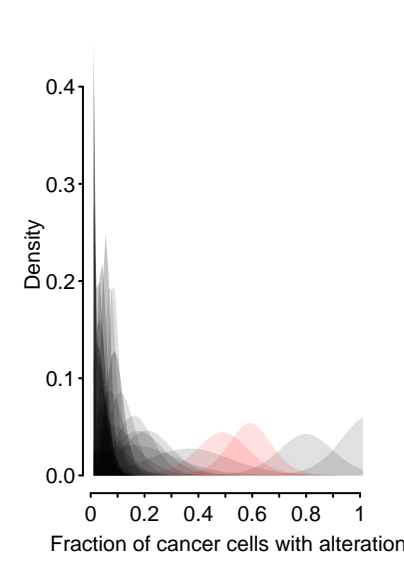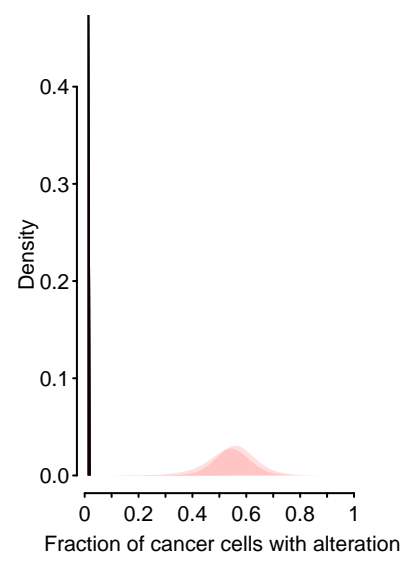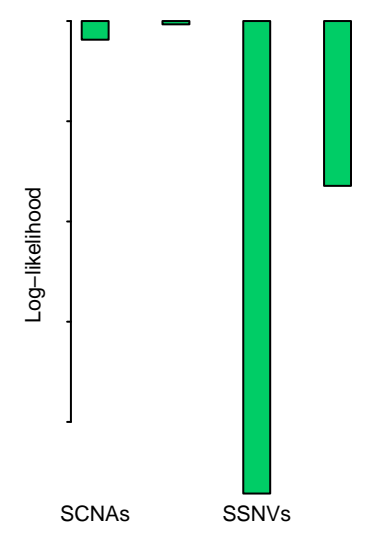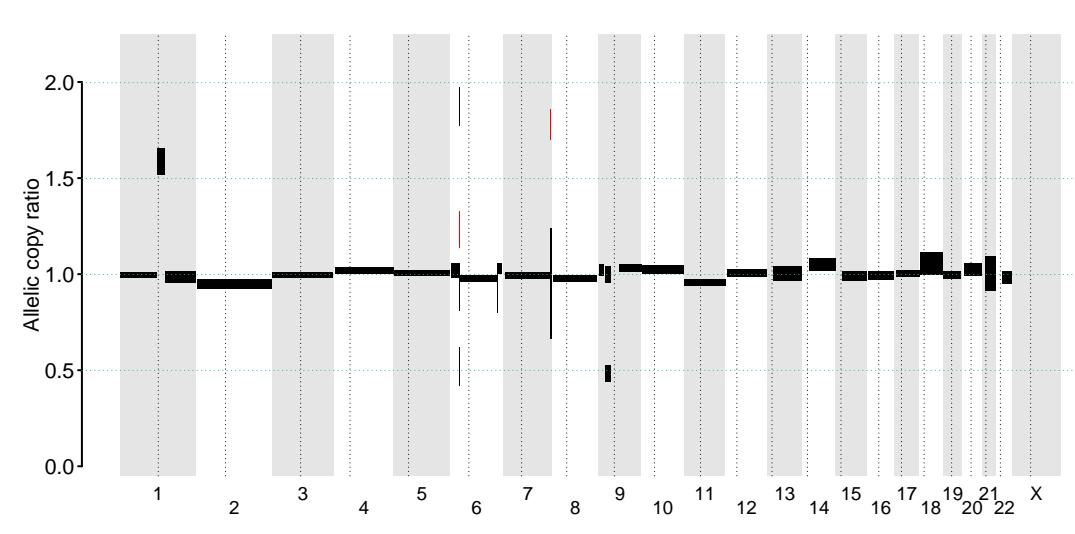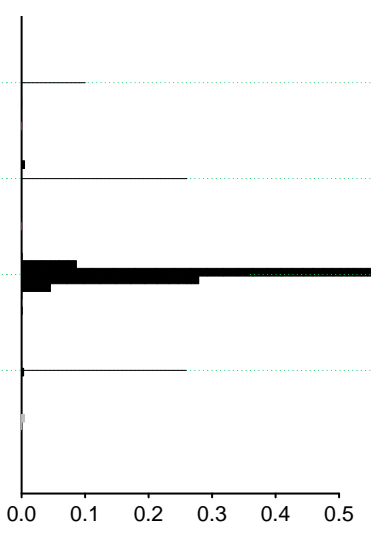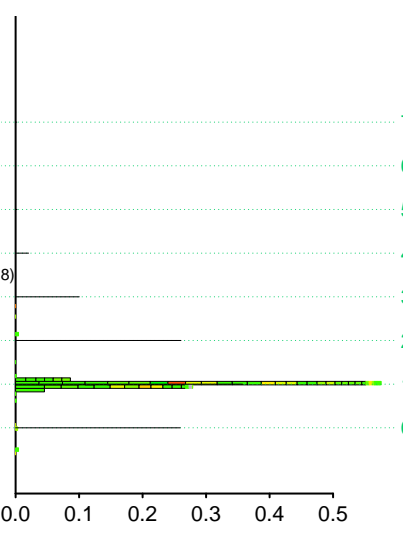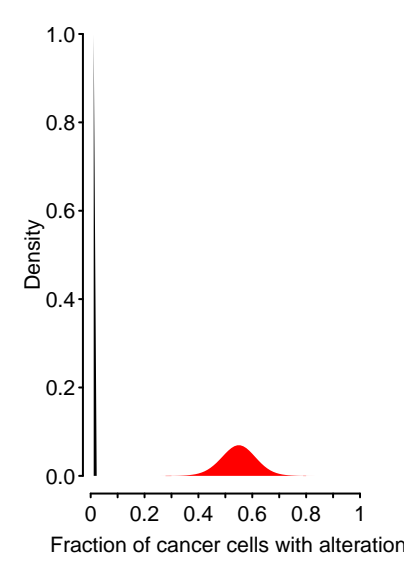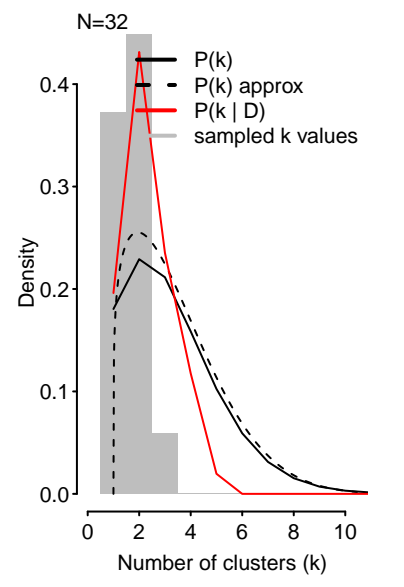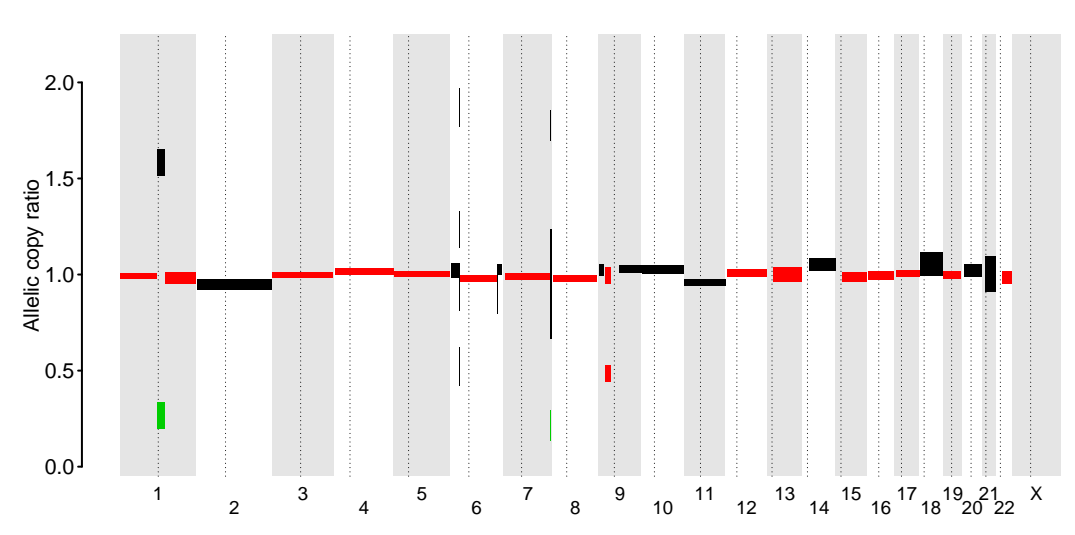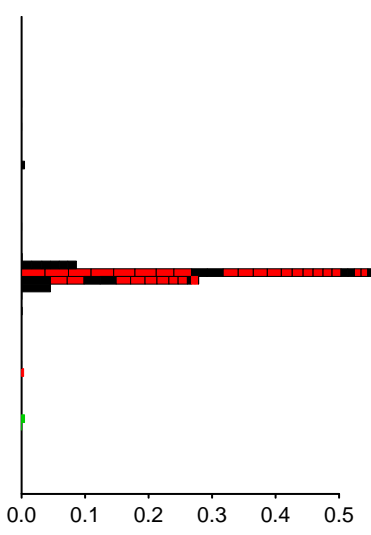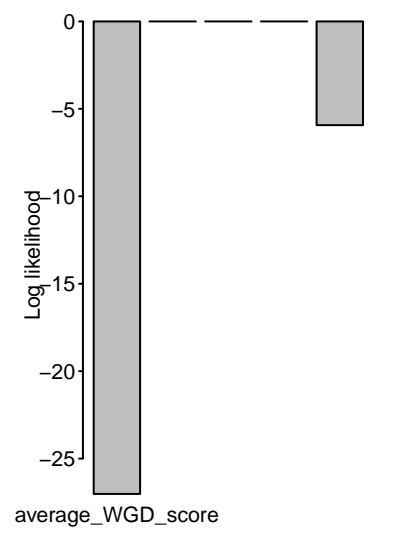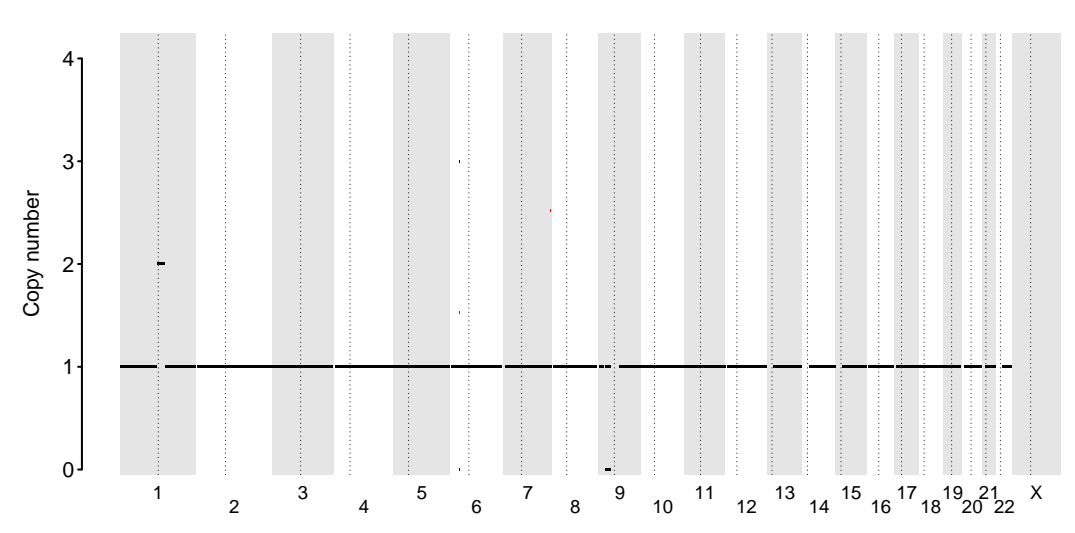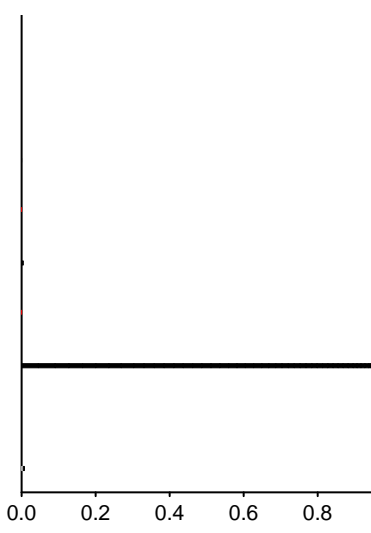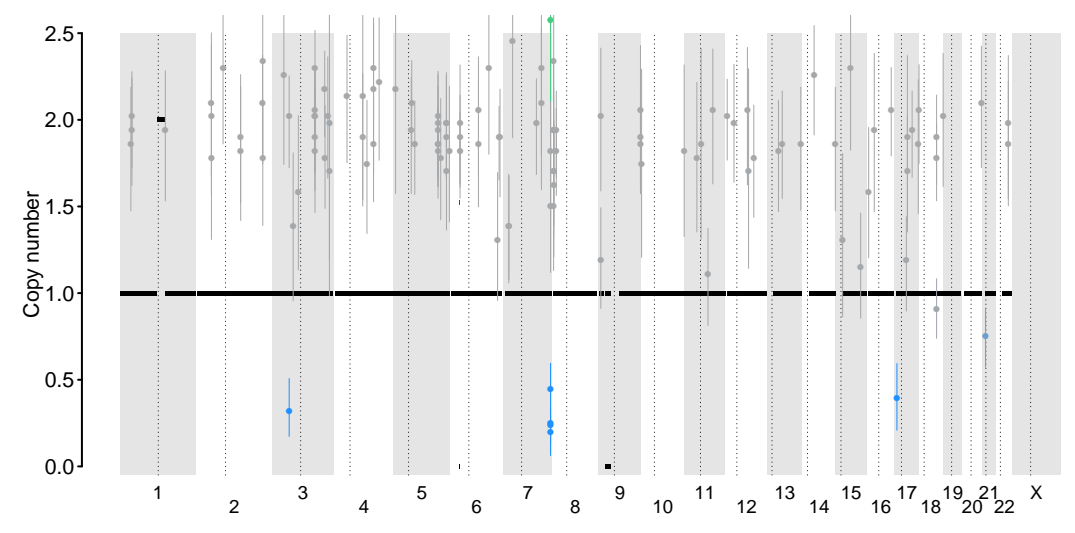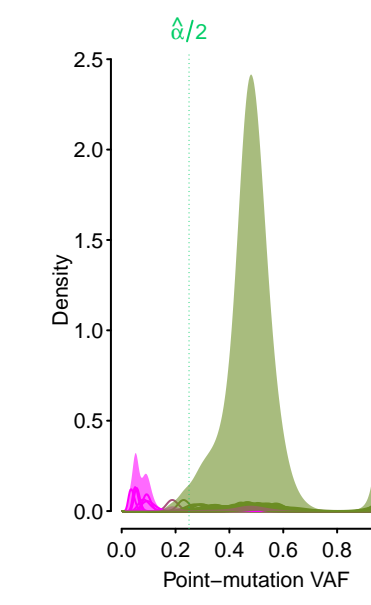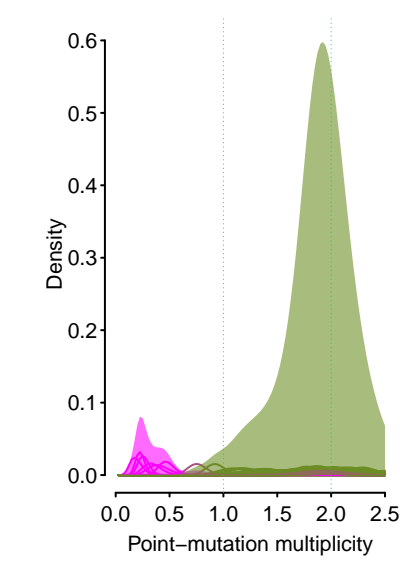

Sample 63

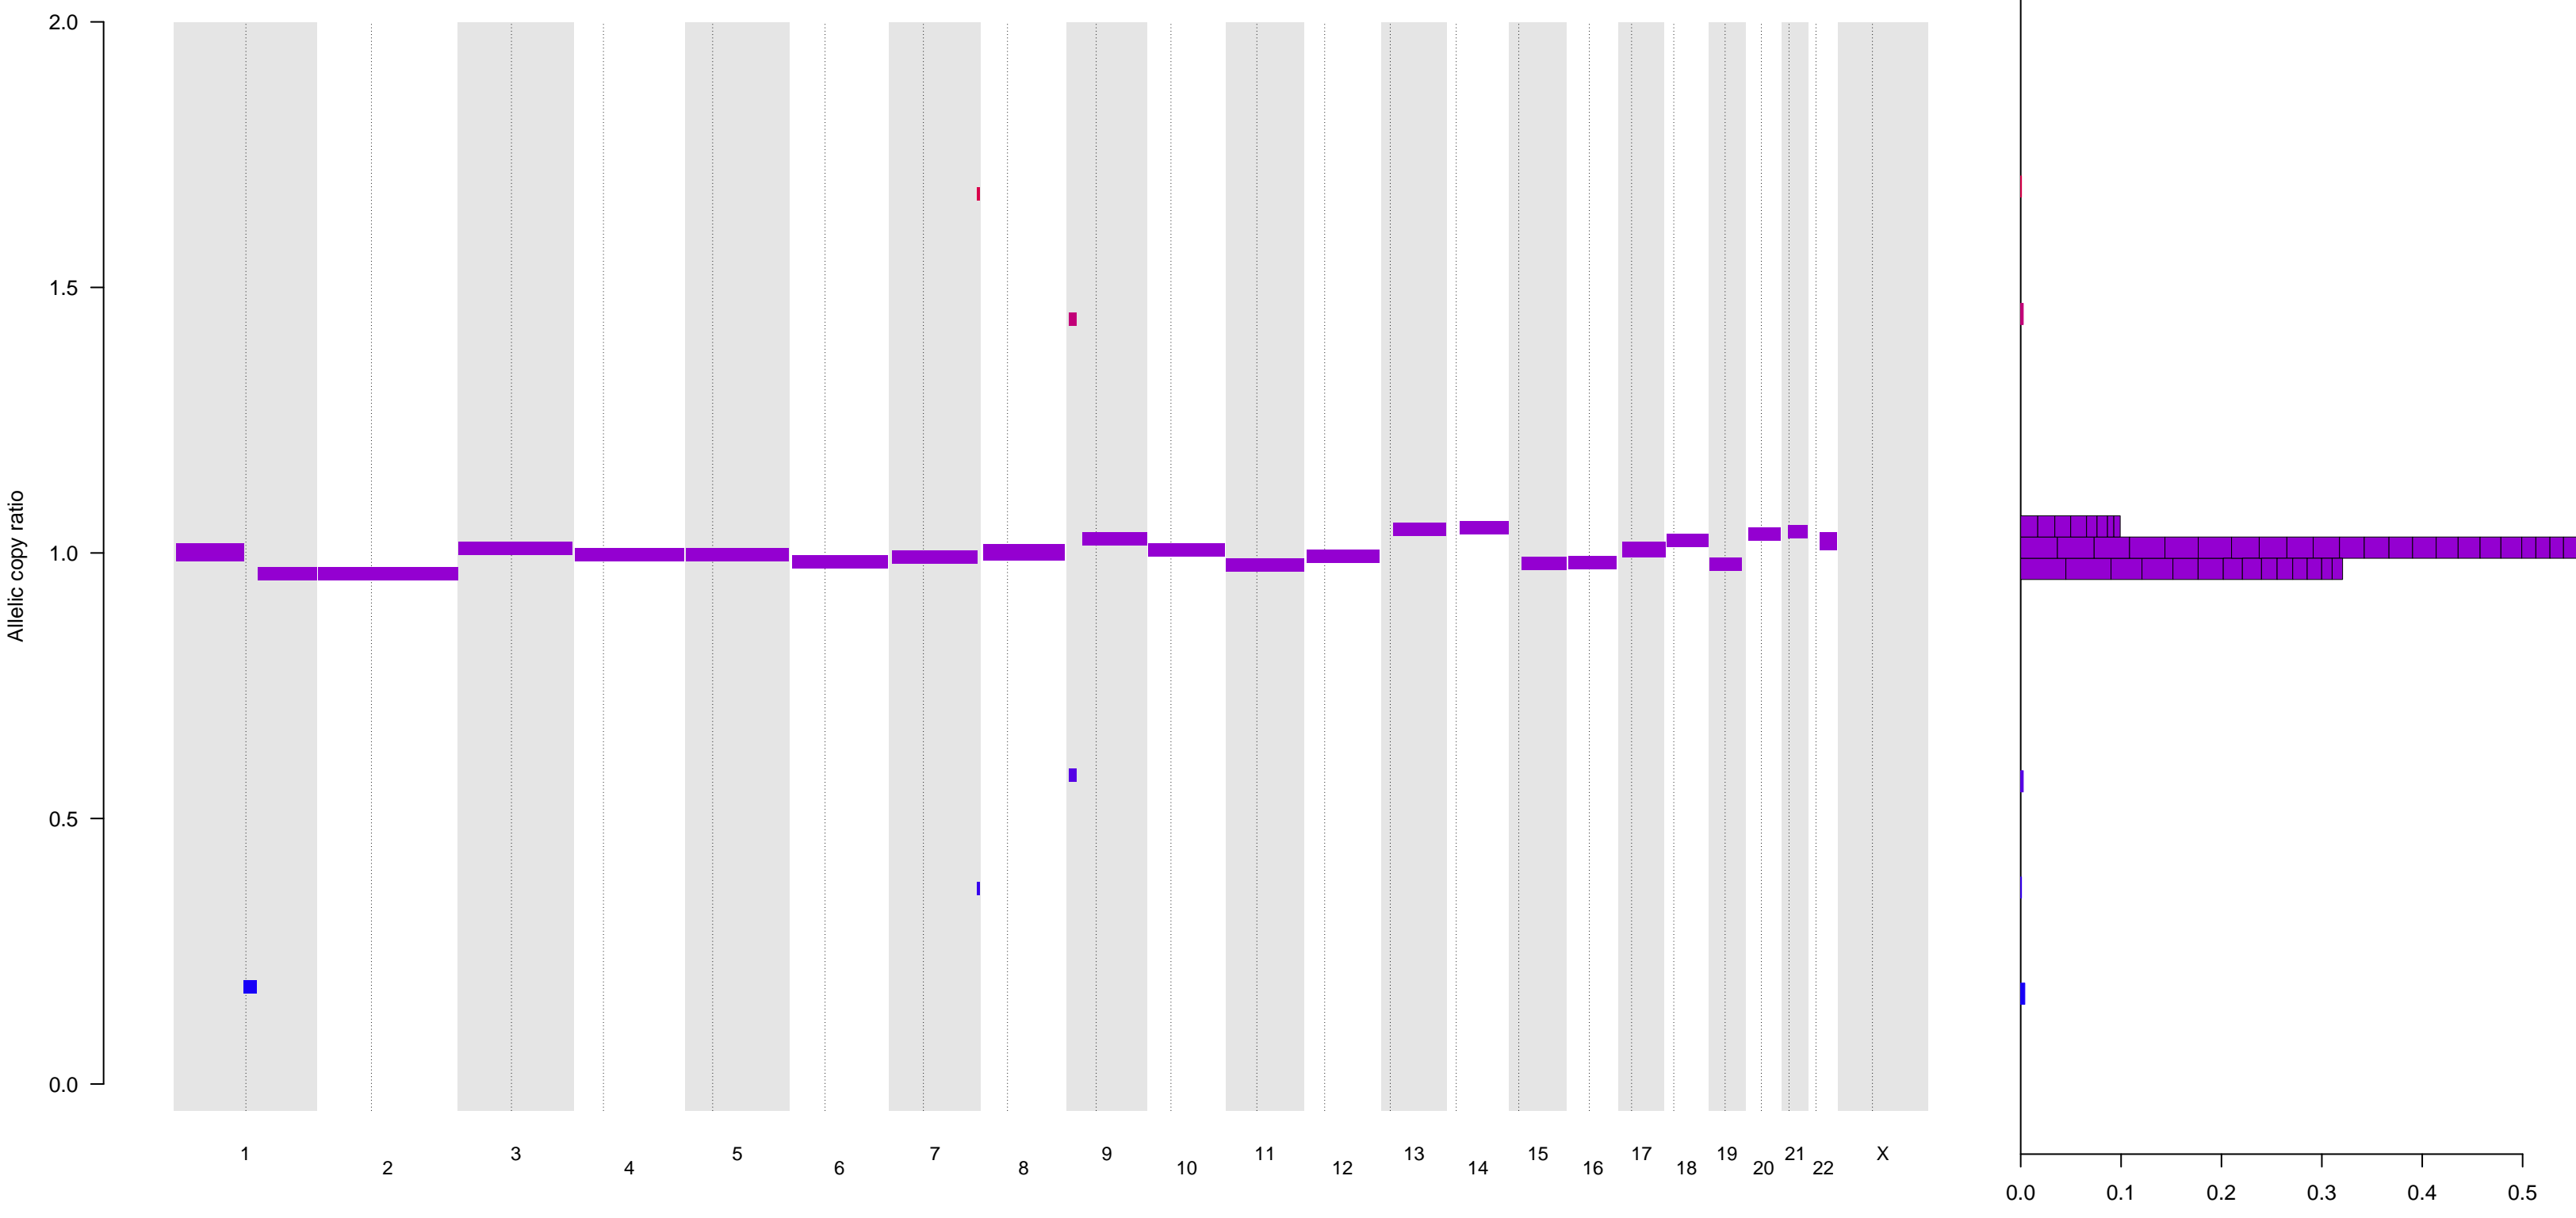

purity( $\hat{\alpha}$ ) = 0.43, ploidy:  $\hat{t} = 2.03$ ,  $\hat{t}_g = 2.01$   
 $\theta_z = 0.01$ ,  $\theta_Q = 1.328$ , WGD=0  
SCNA LL = -142.76, SSNV LL = -4884.27, SCNA Ev = -29.60161

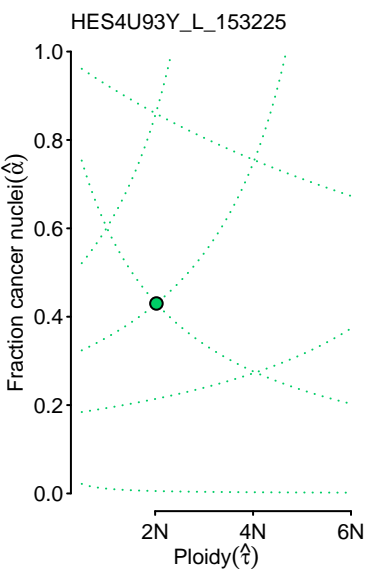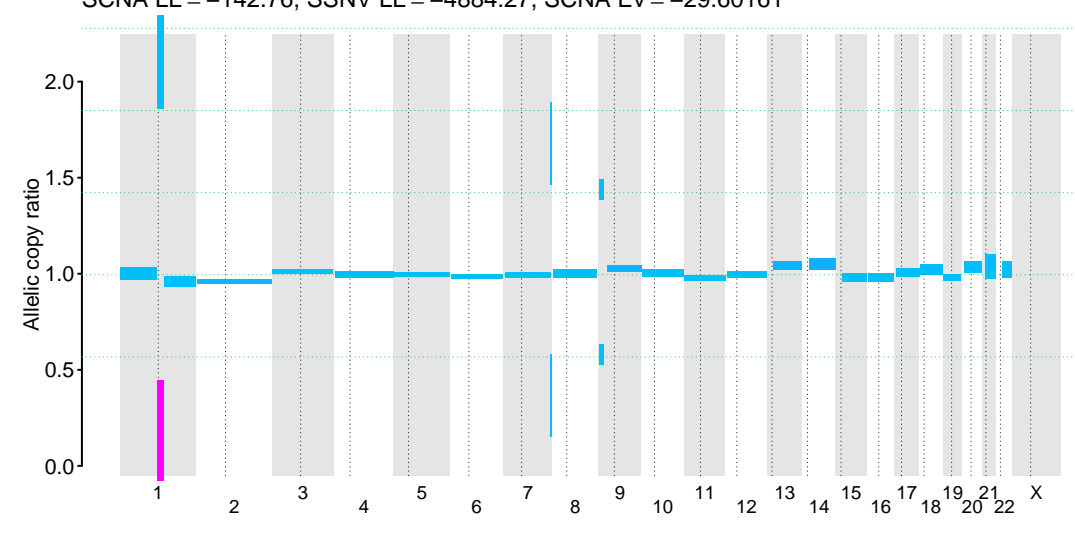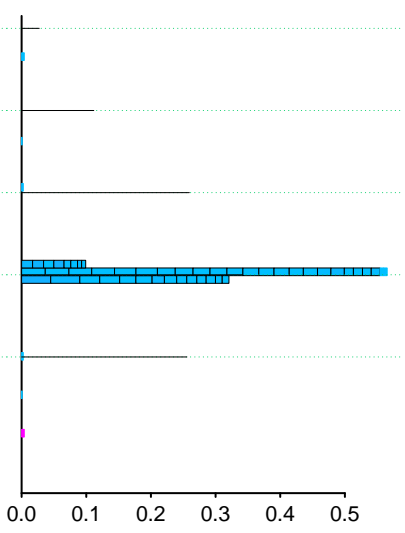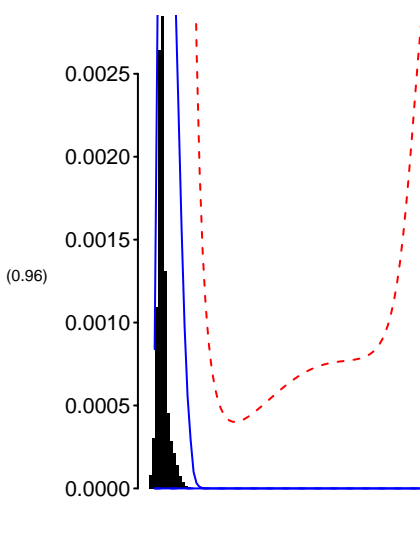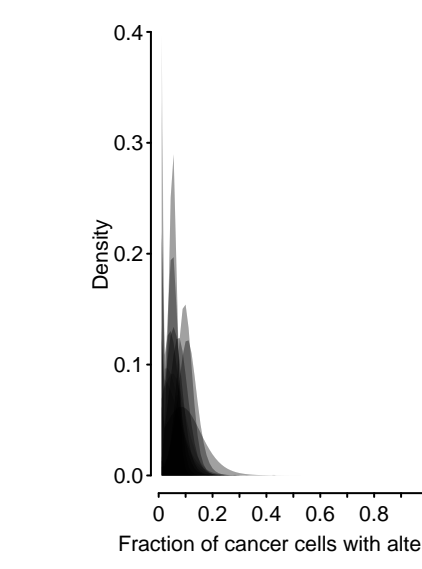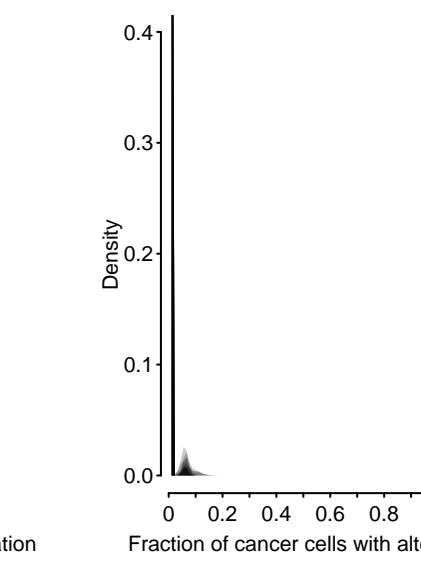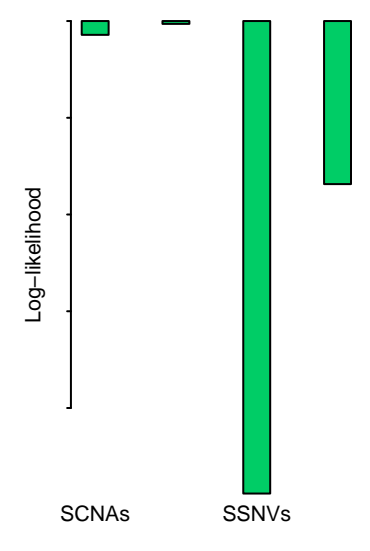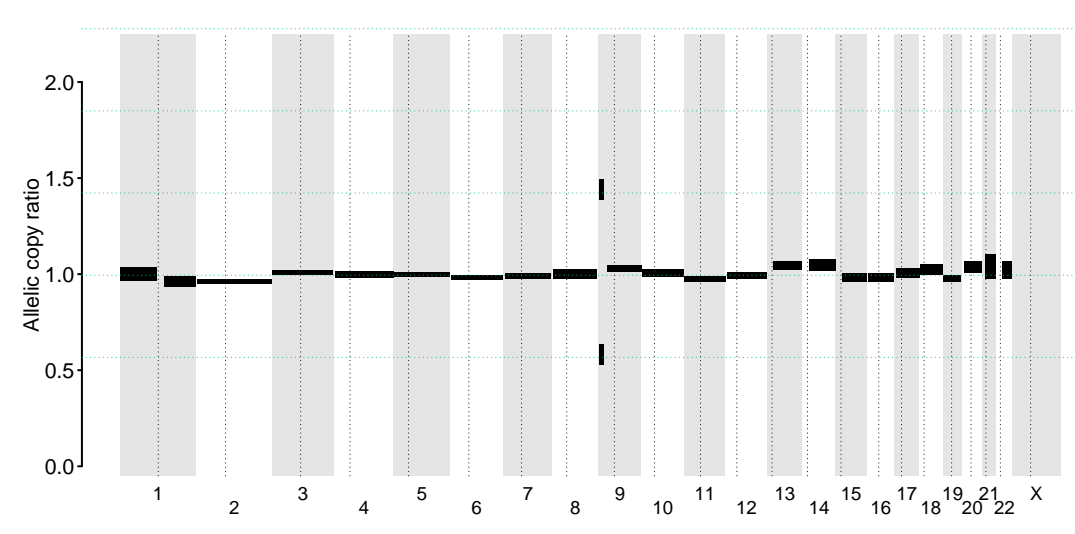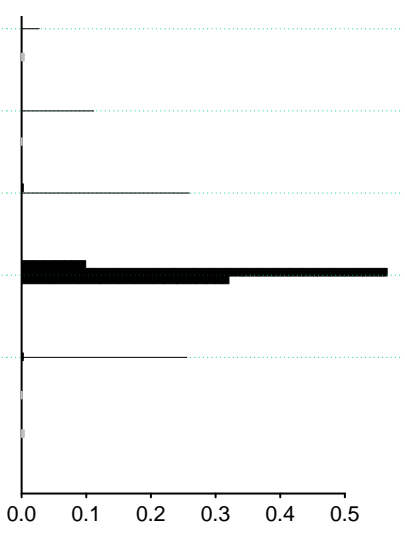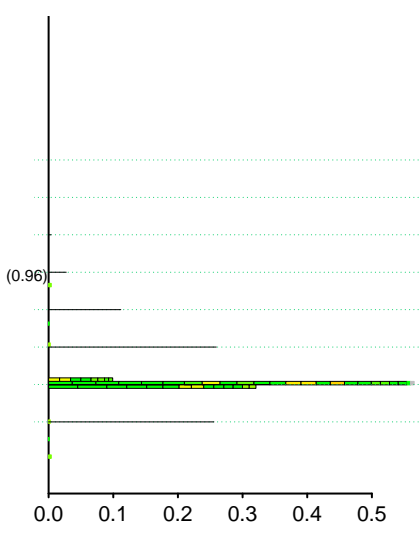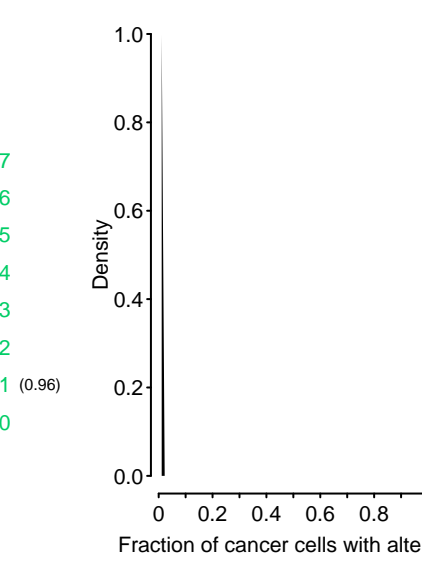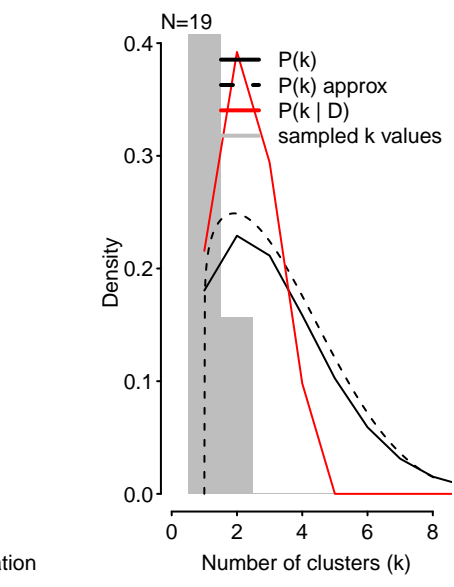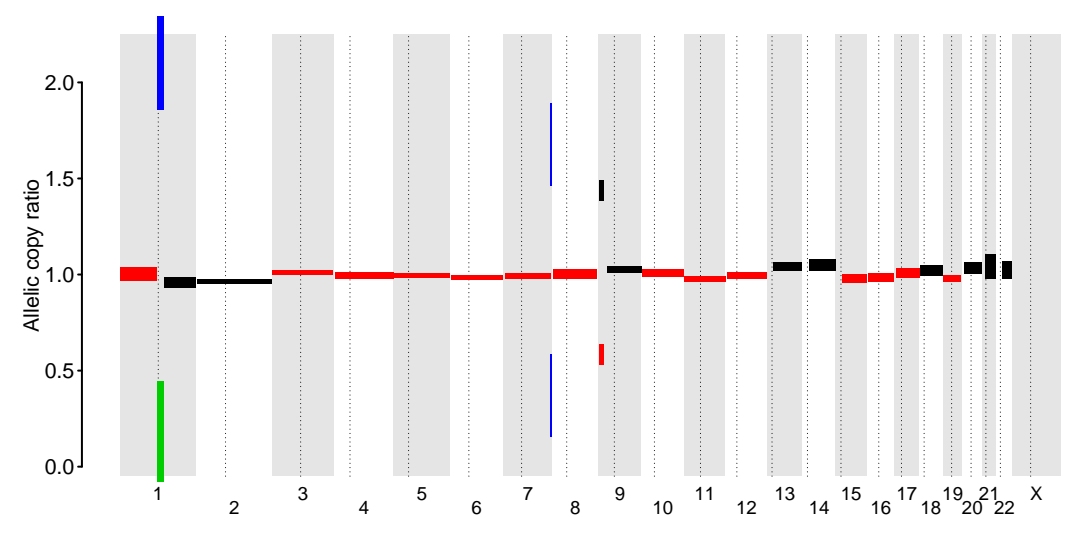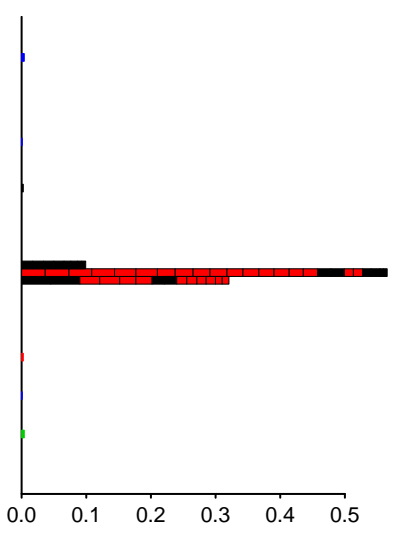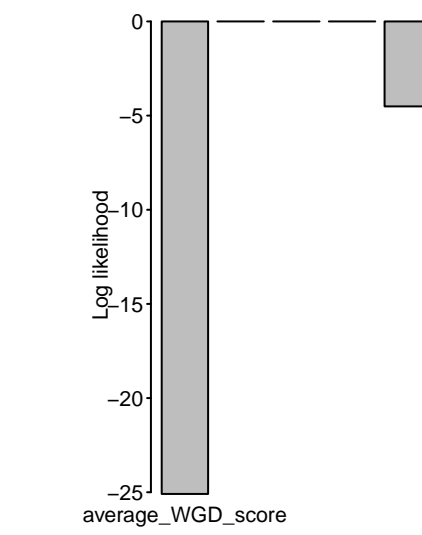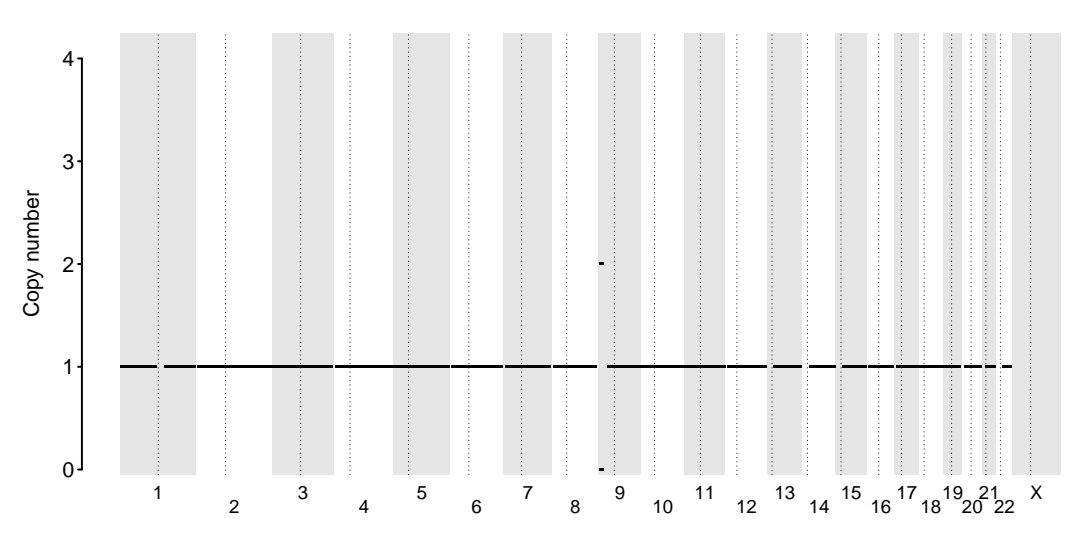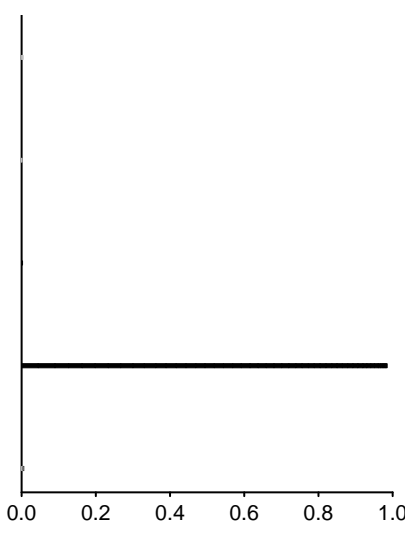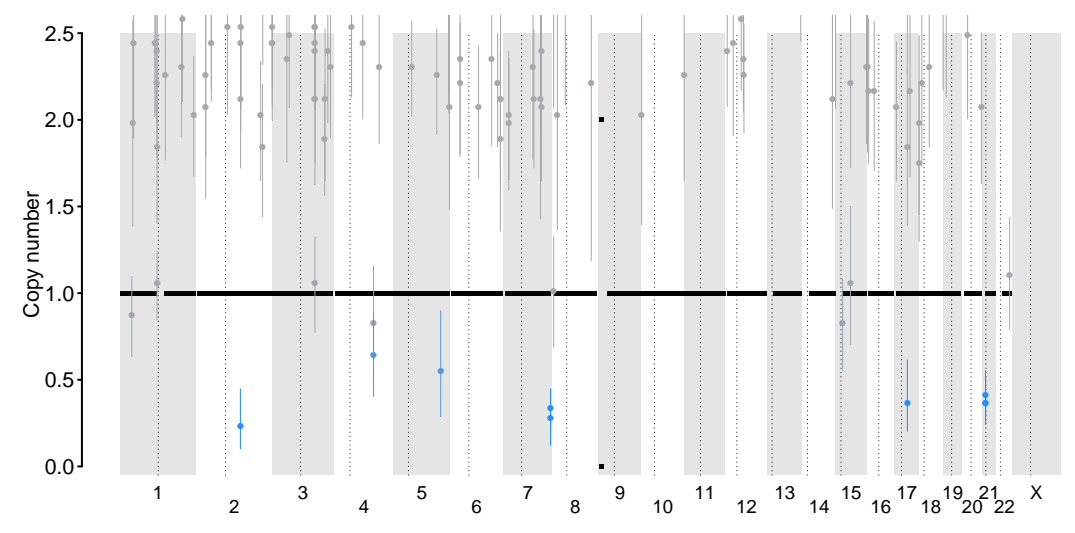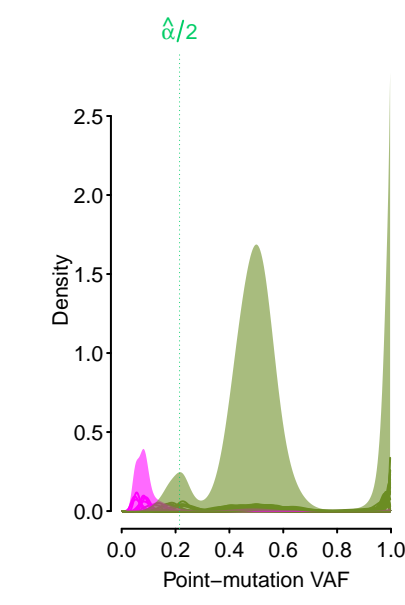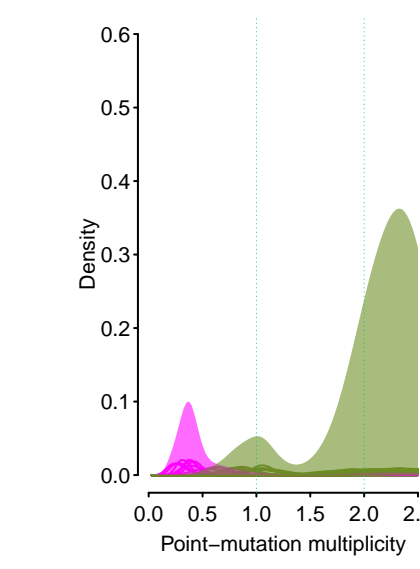

Sample 64

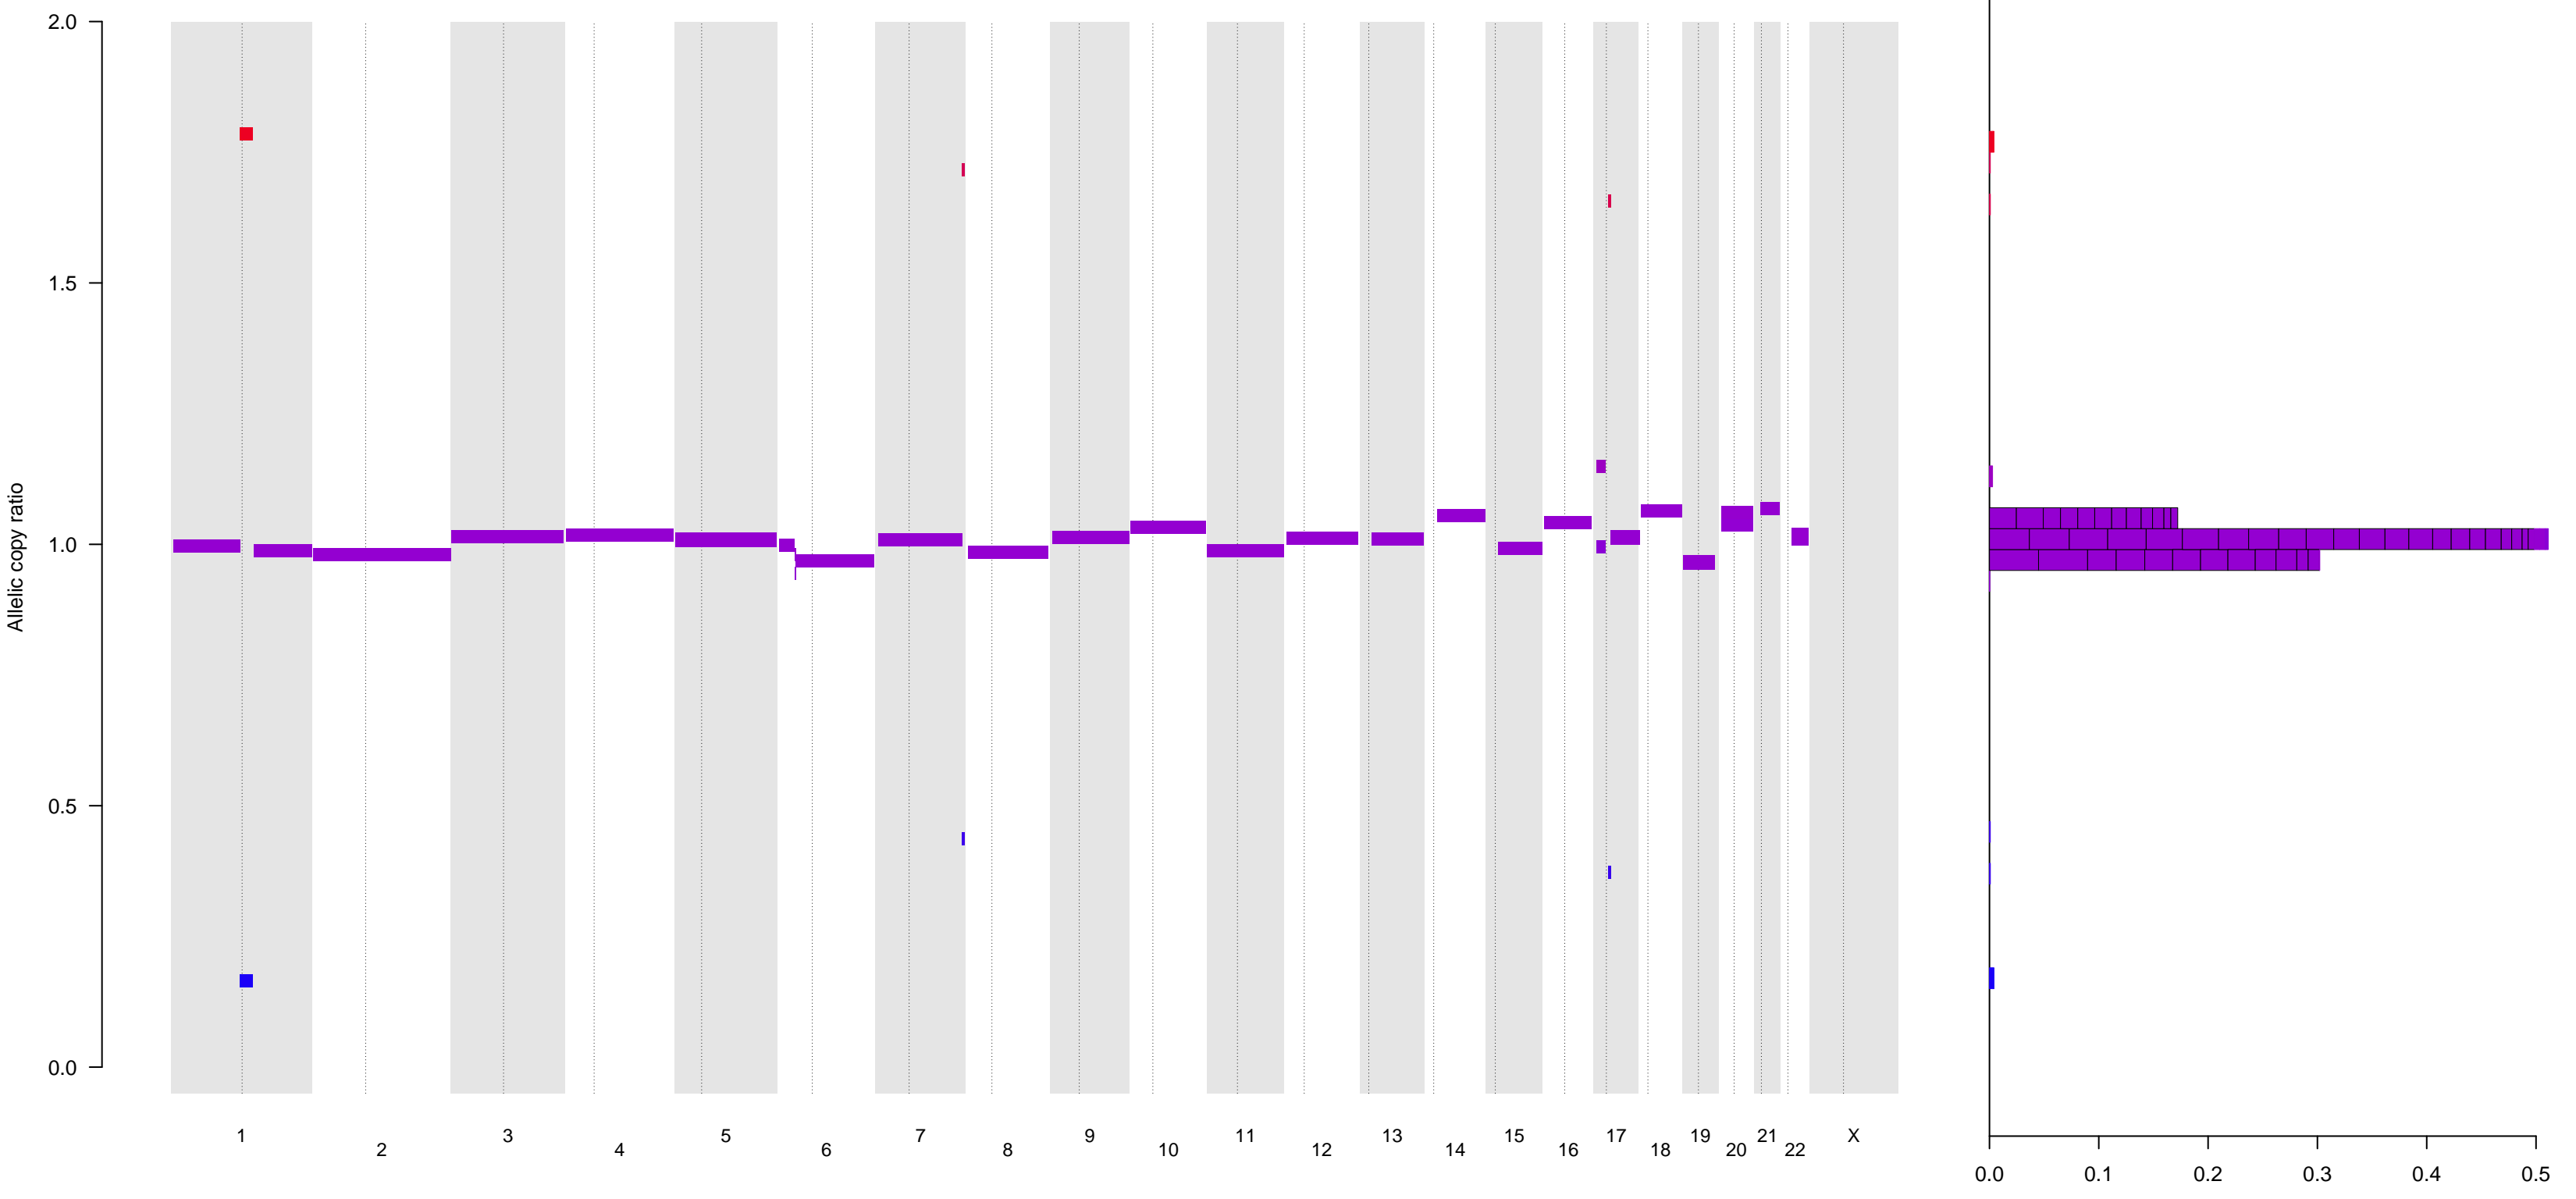

$\hat{\alpha} = 0.19$ , ploidy:  $\hat{\tau} = 1.99$ ,  $\hat{\tau}_g = 2.04$   
 $\theta_z = 0.16$ ,  $\theta_Q = 1.681$ , WGD=0  
 SCNA LL = -239.77, SSNV LL = -8823.64, SCNA Ev = -89.37359

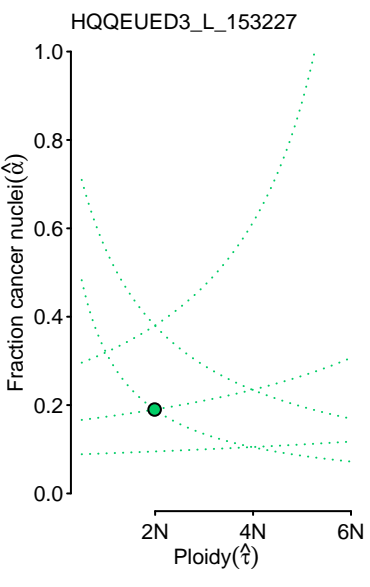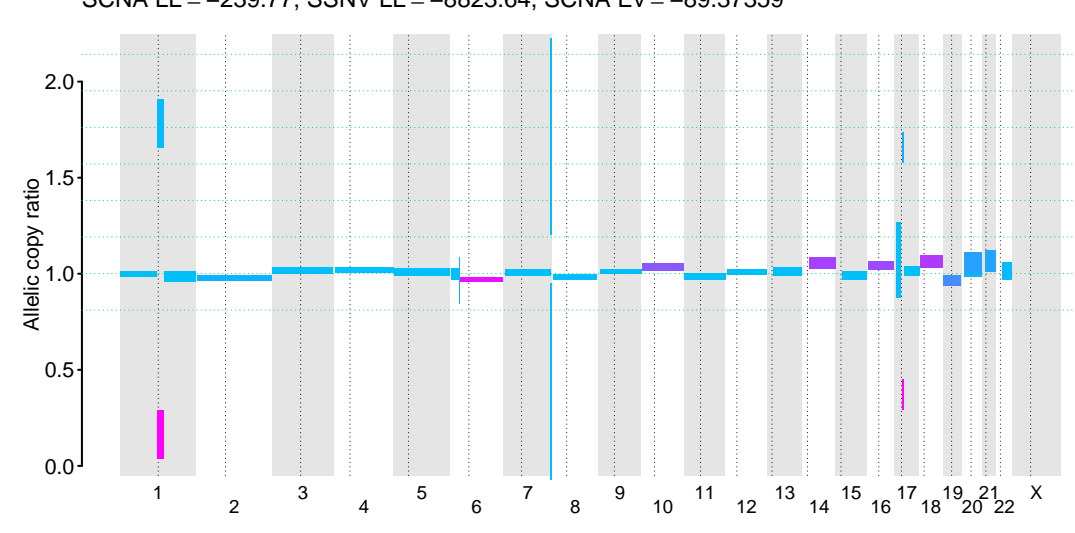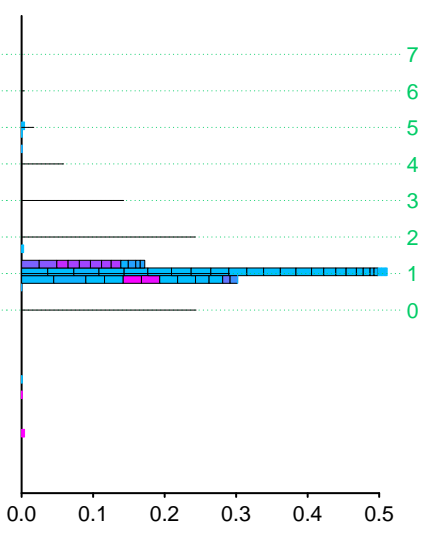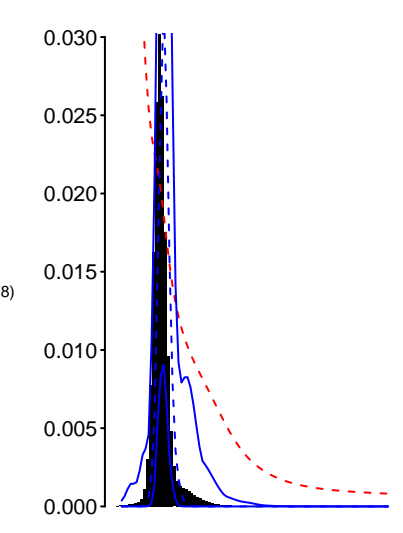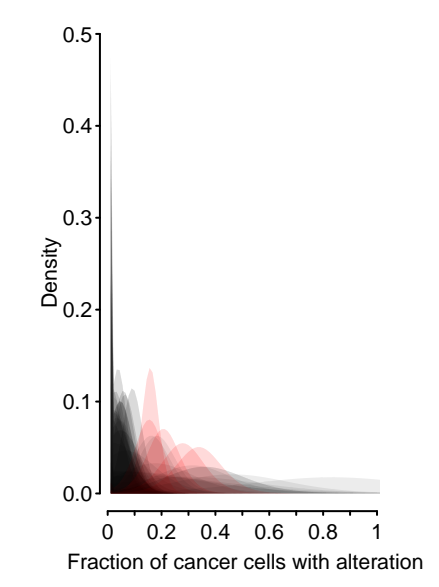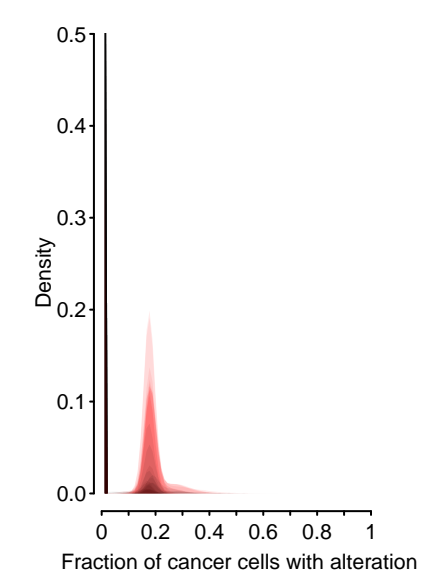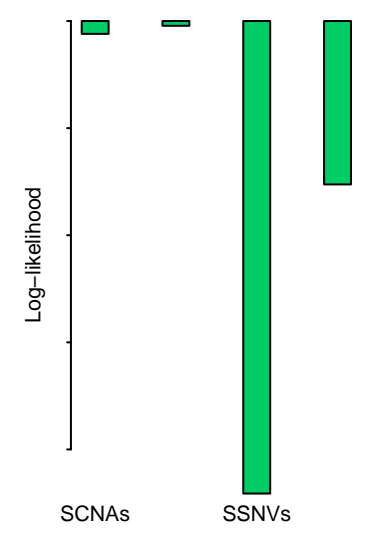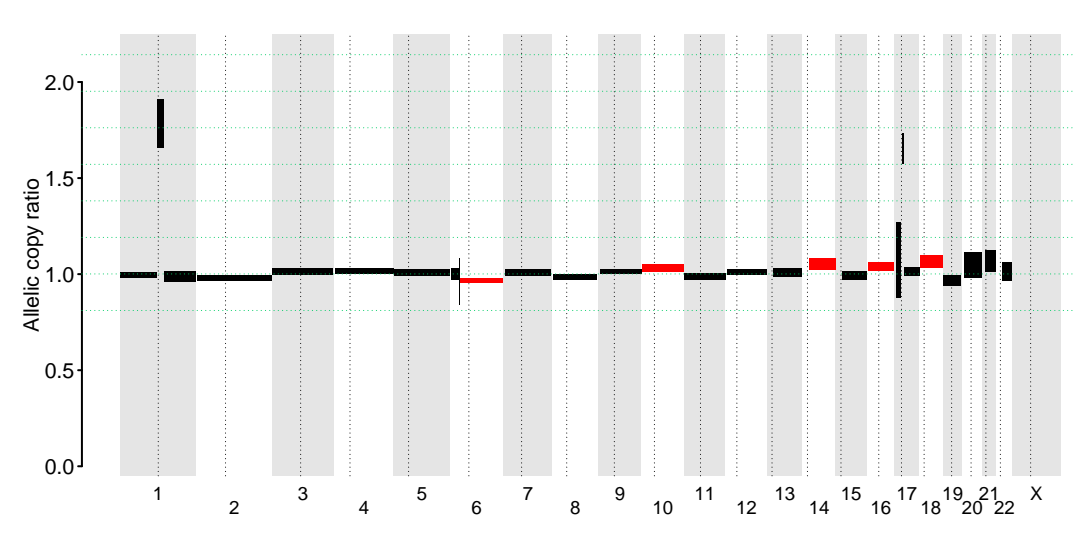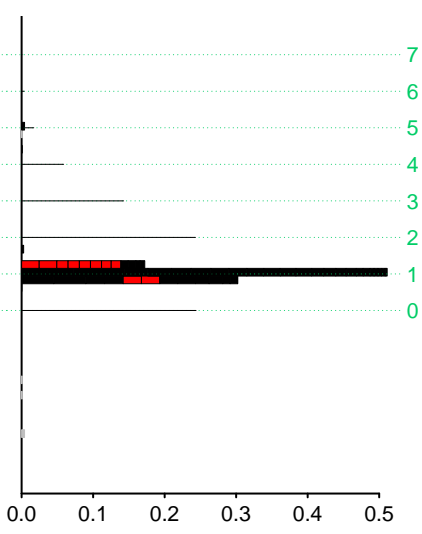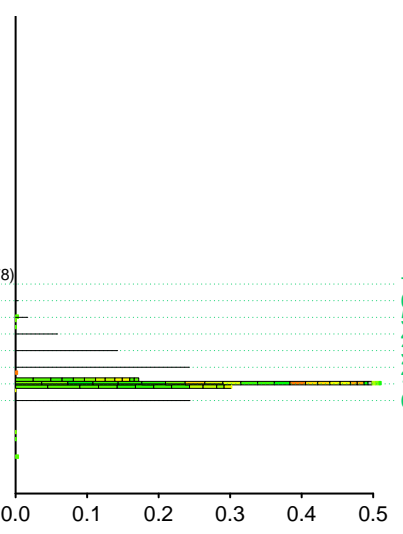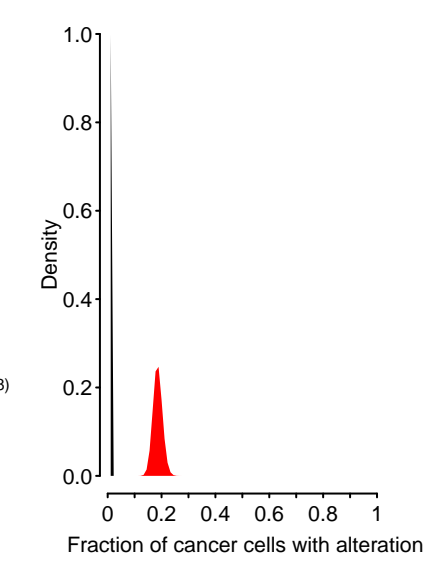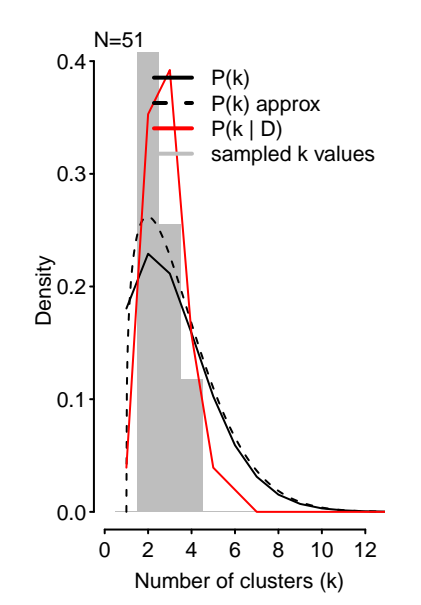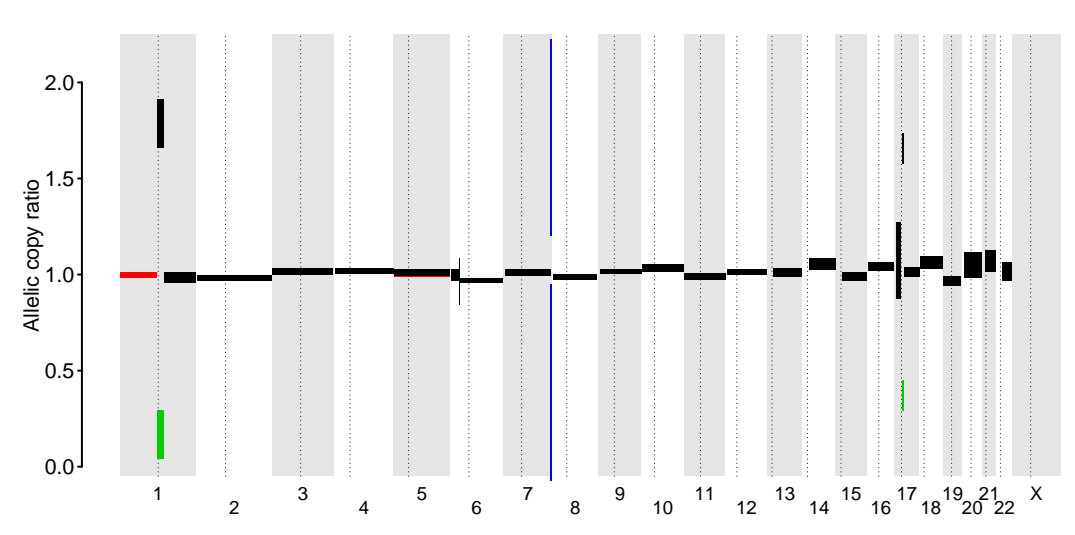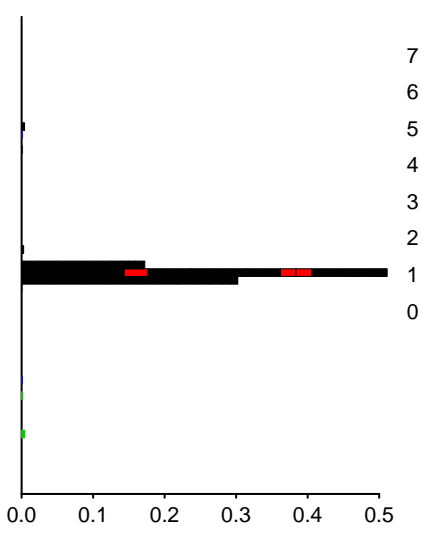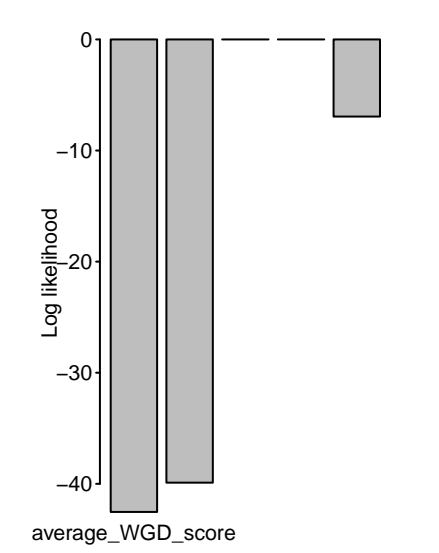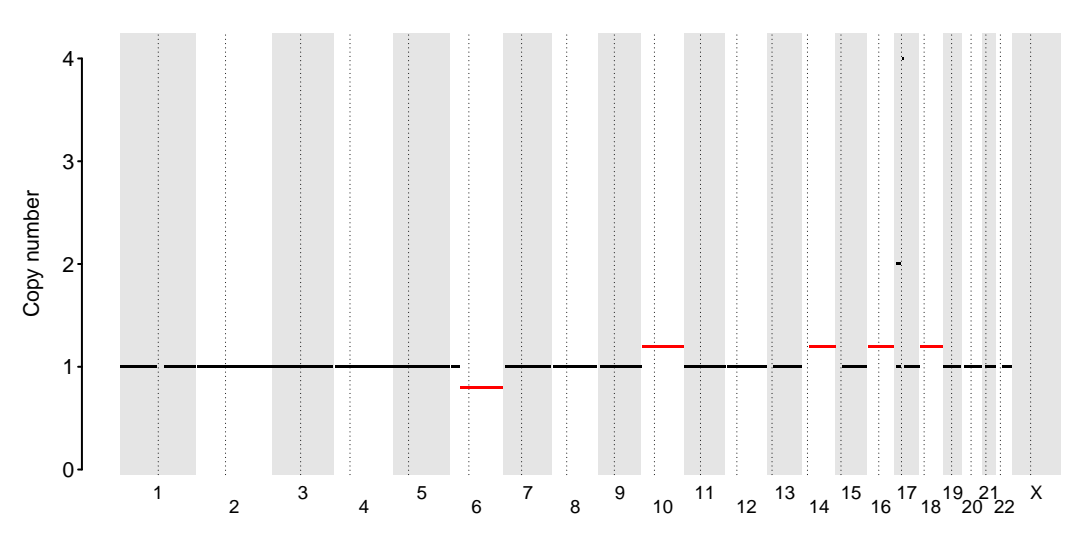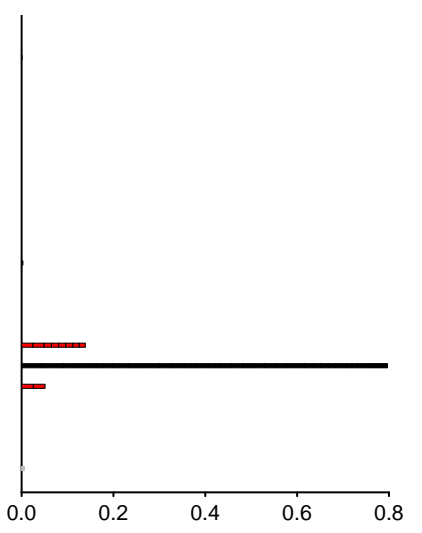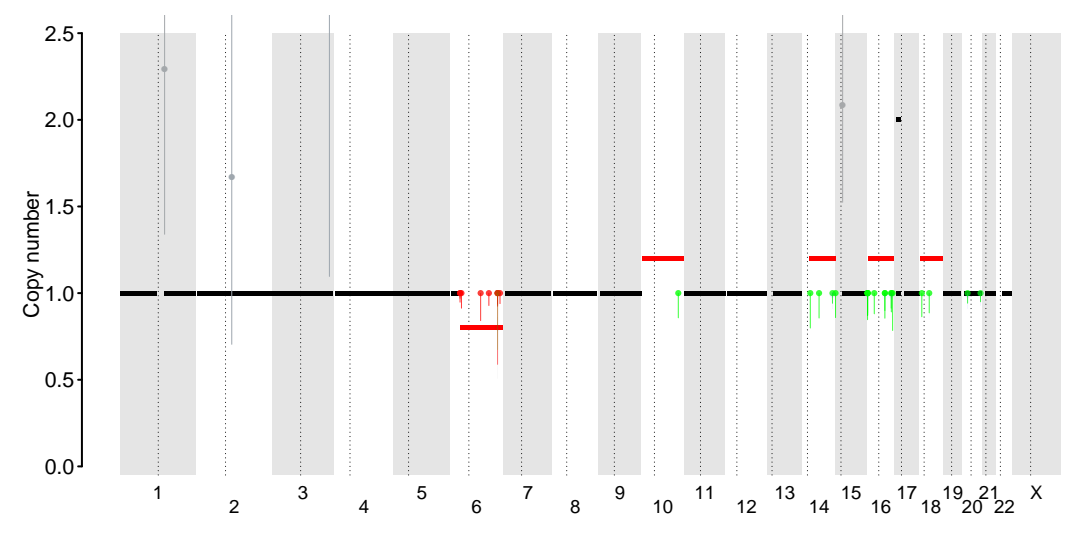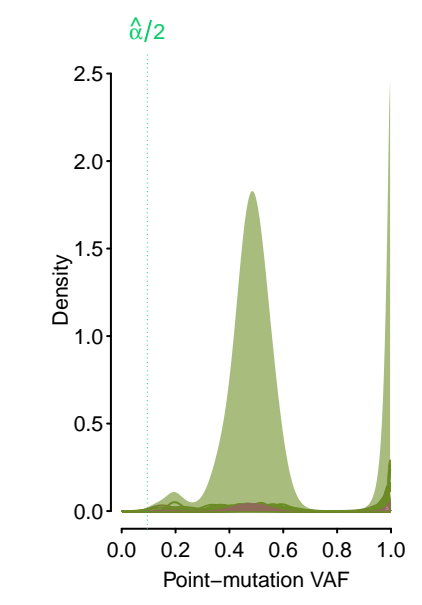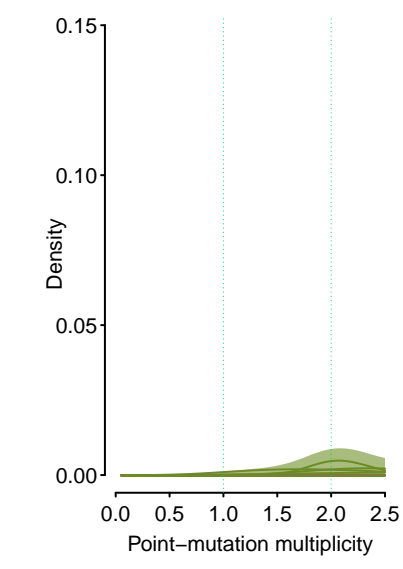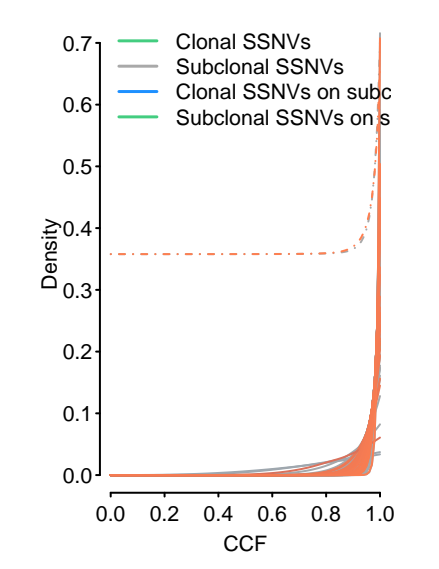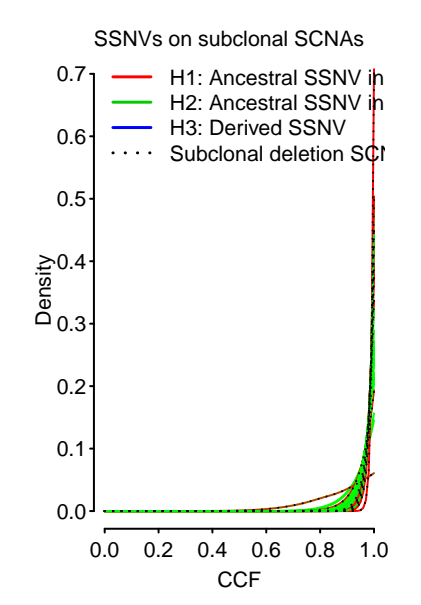

Sample 65

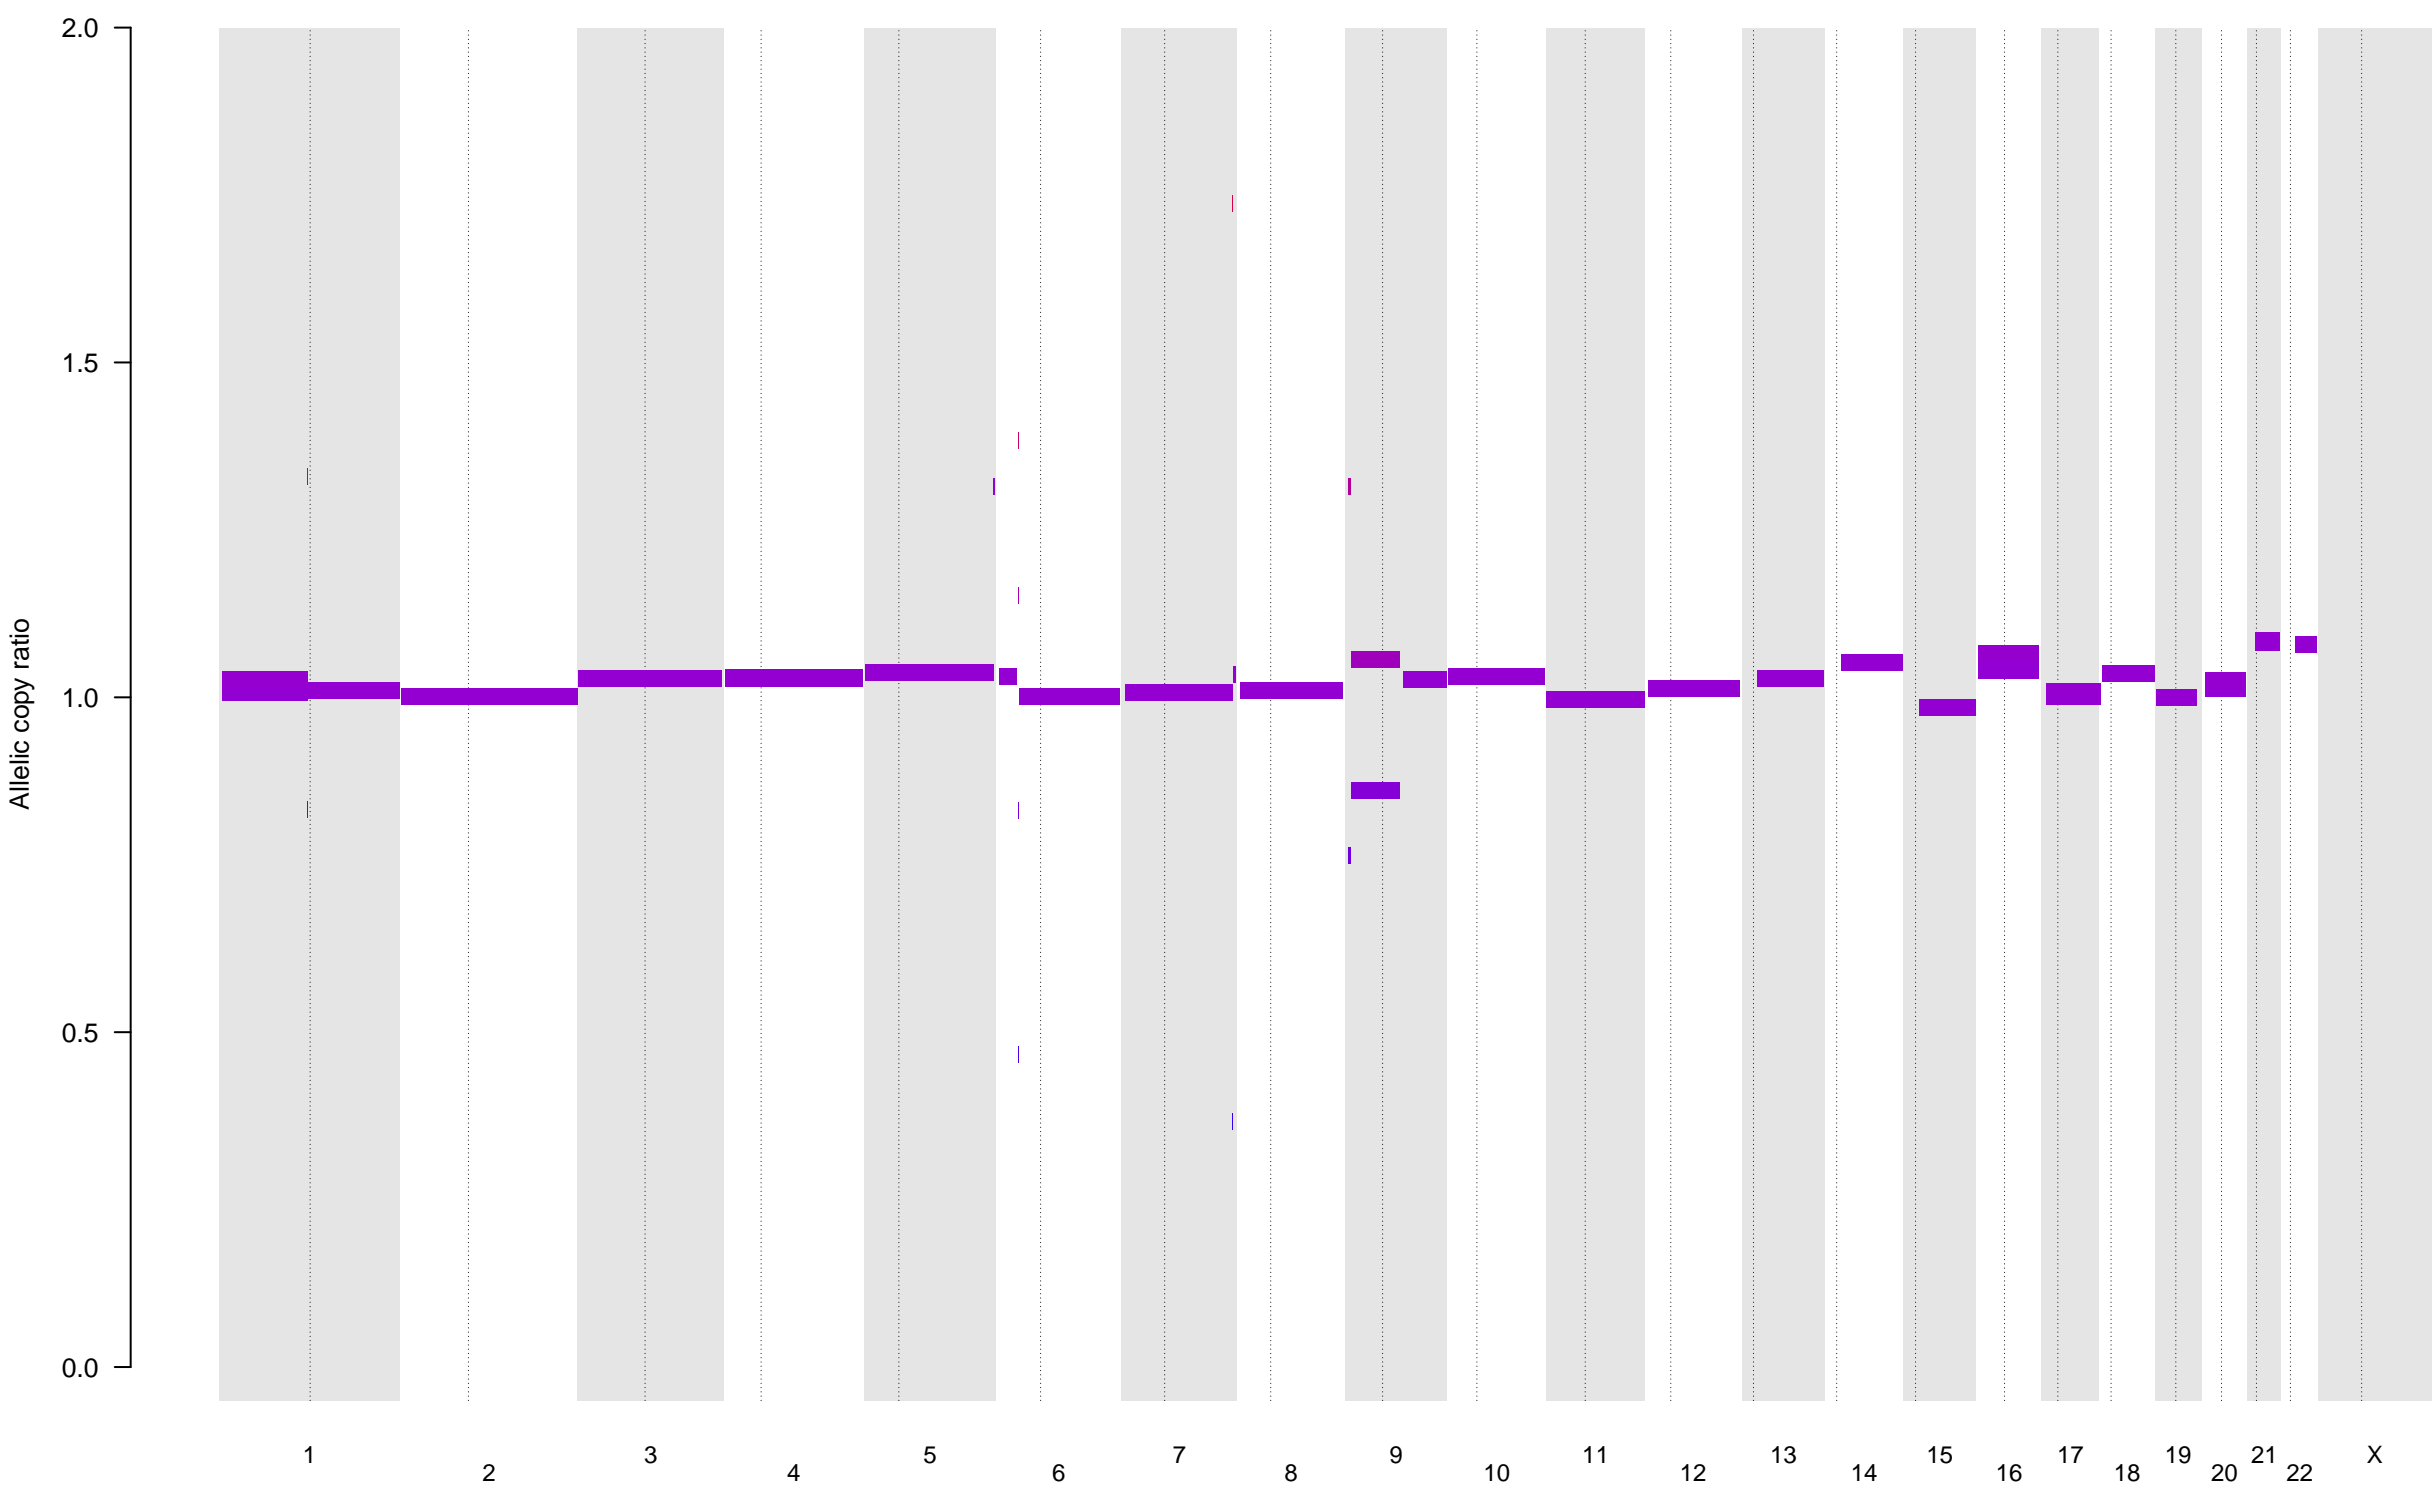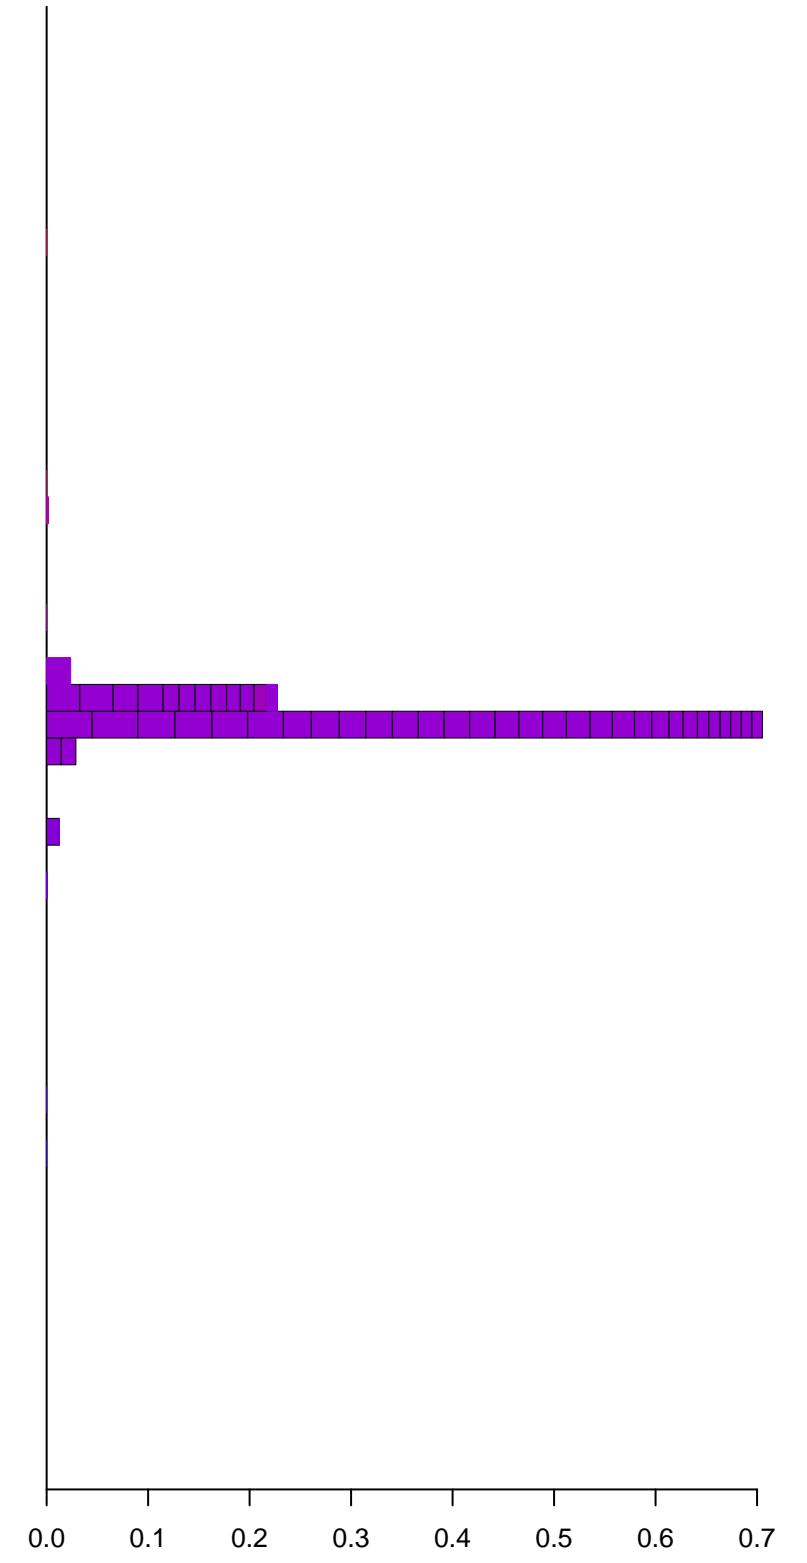

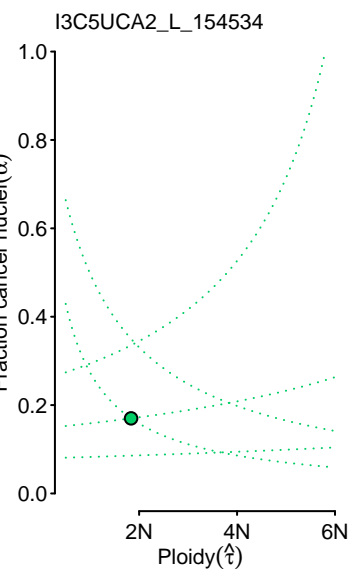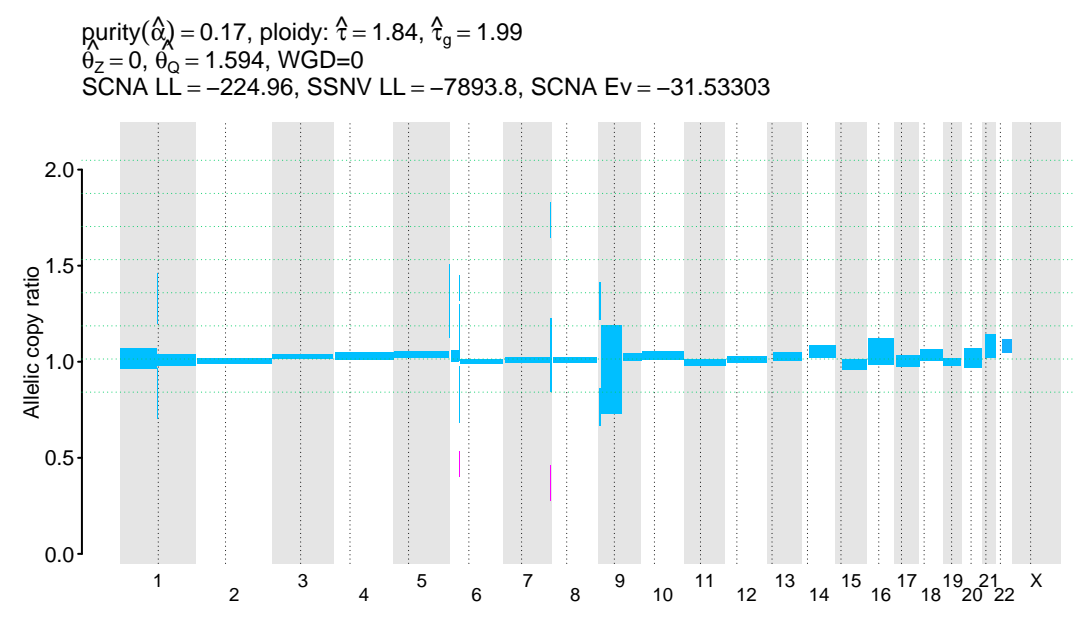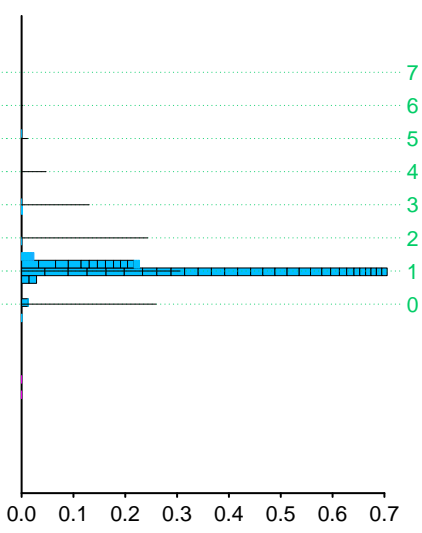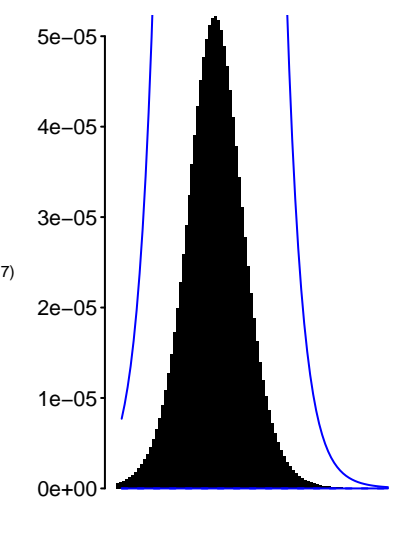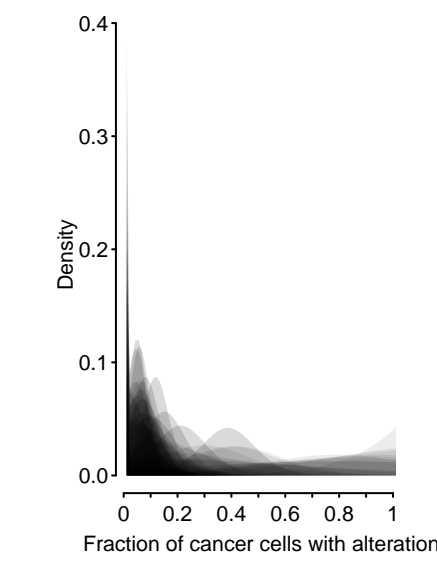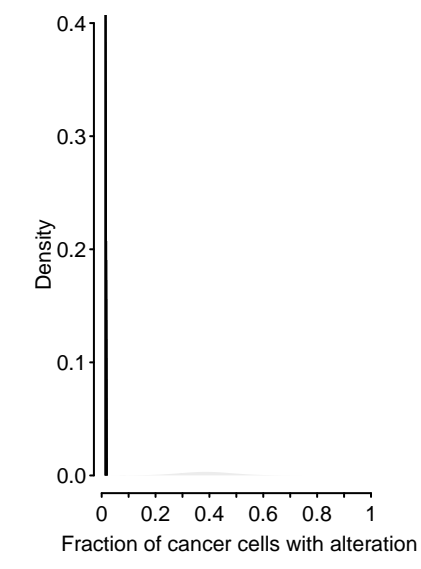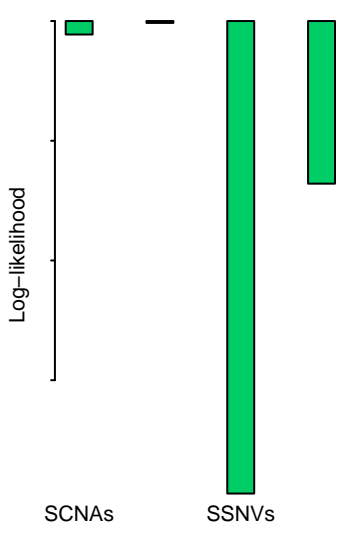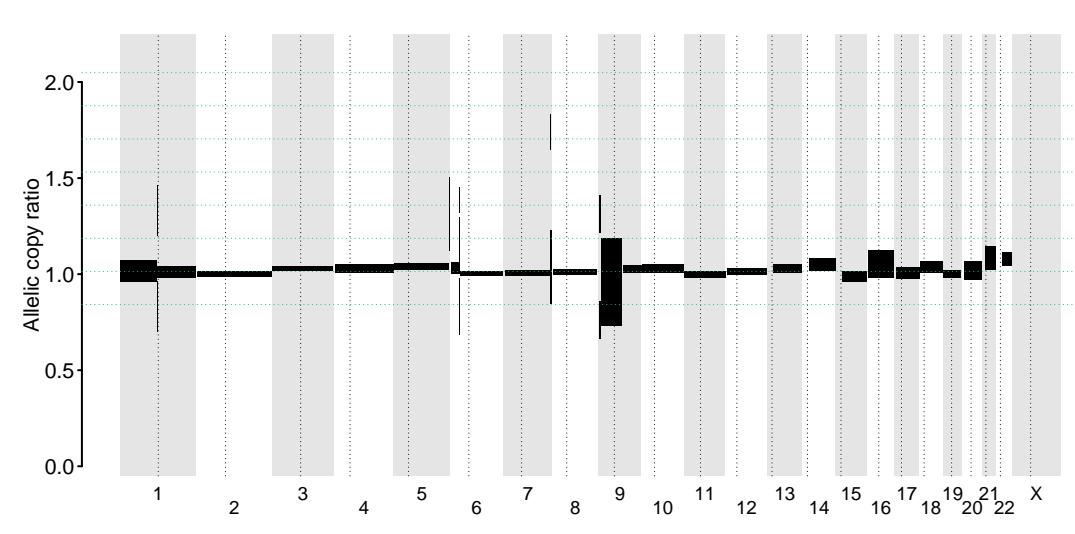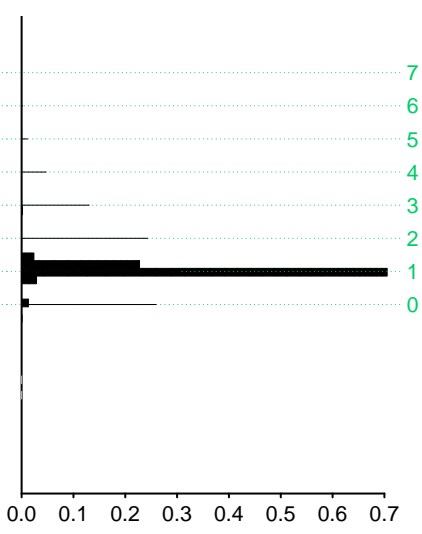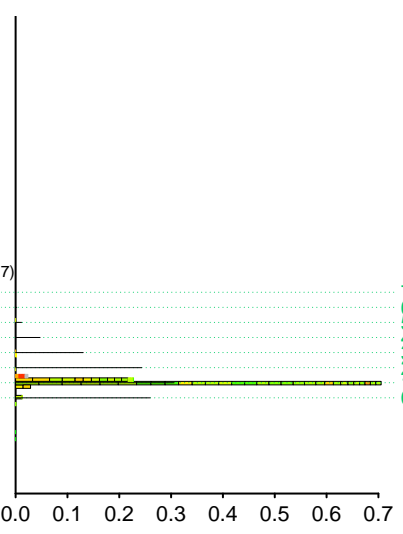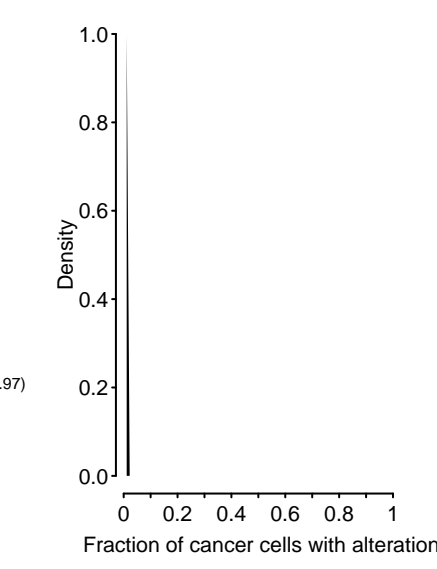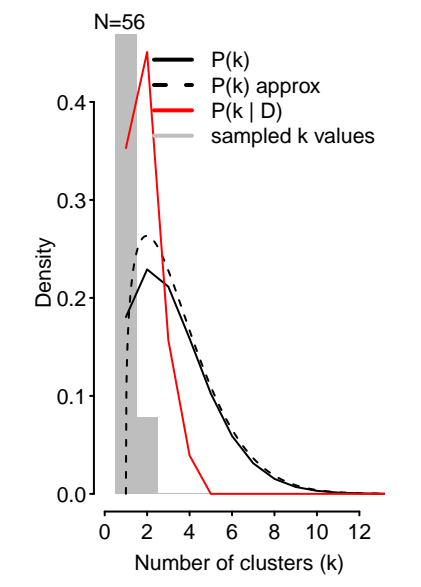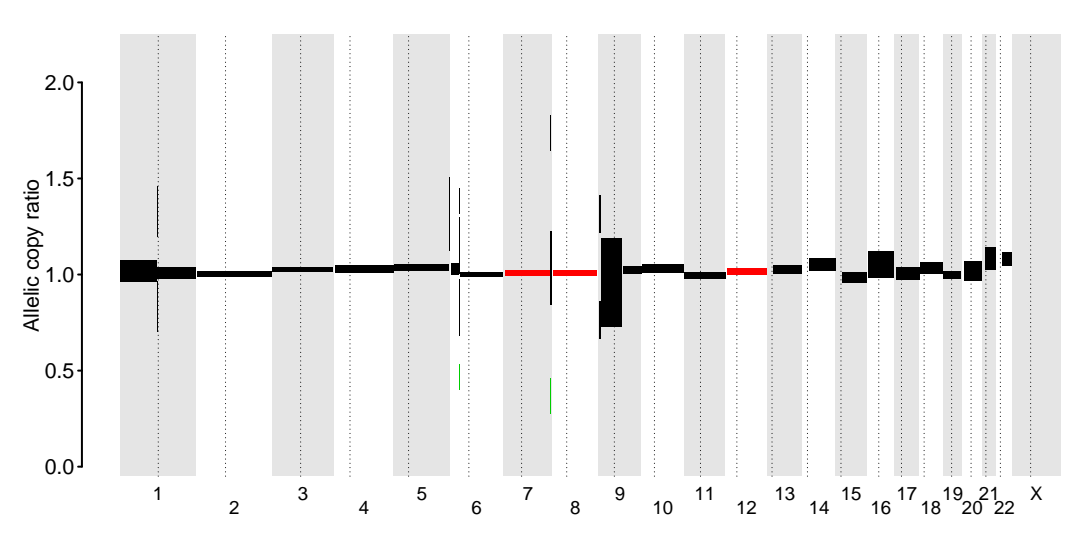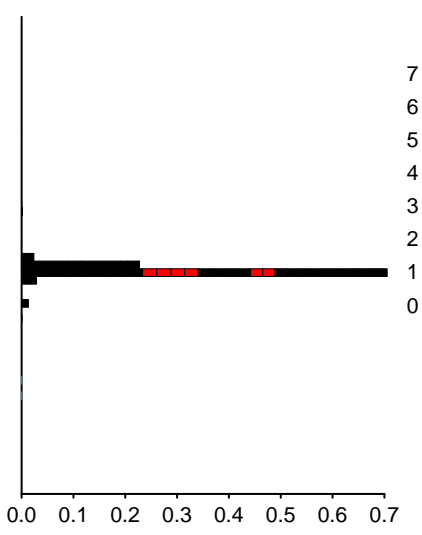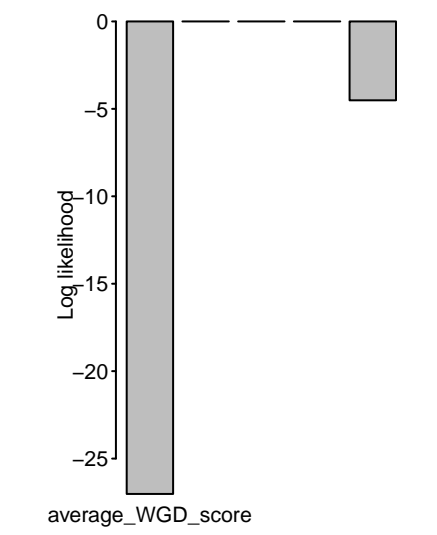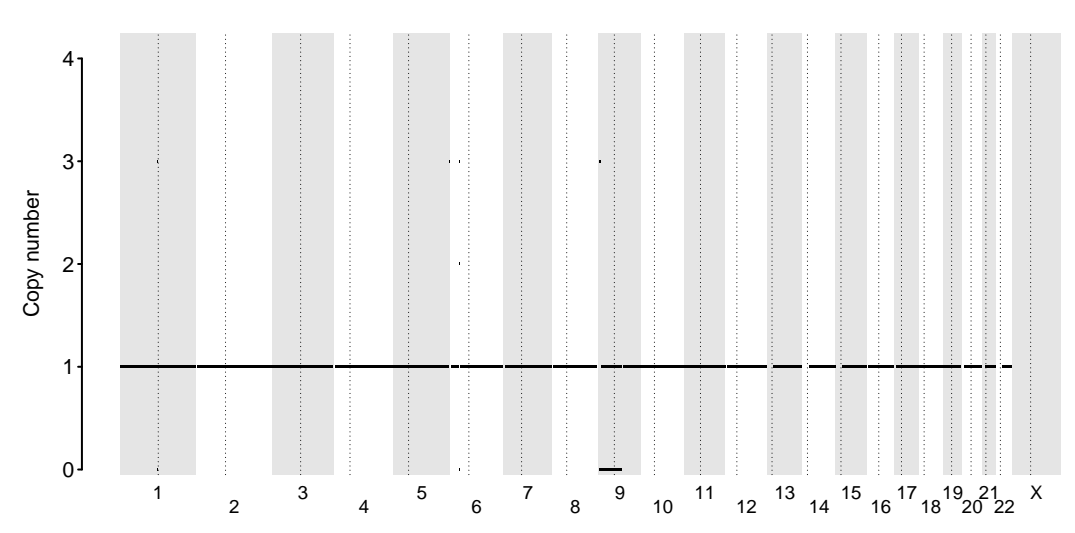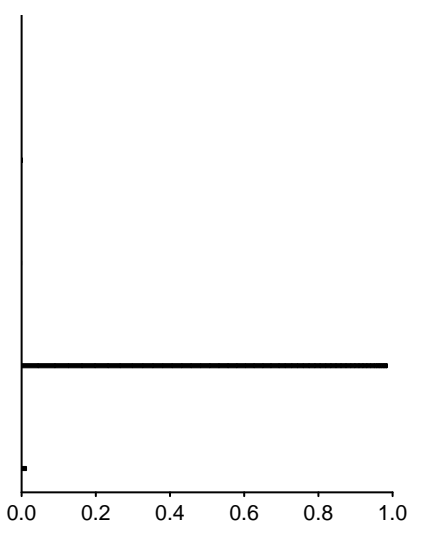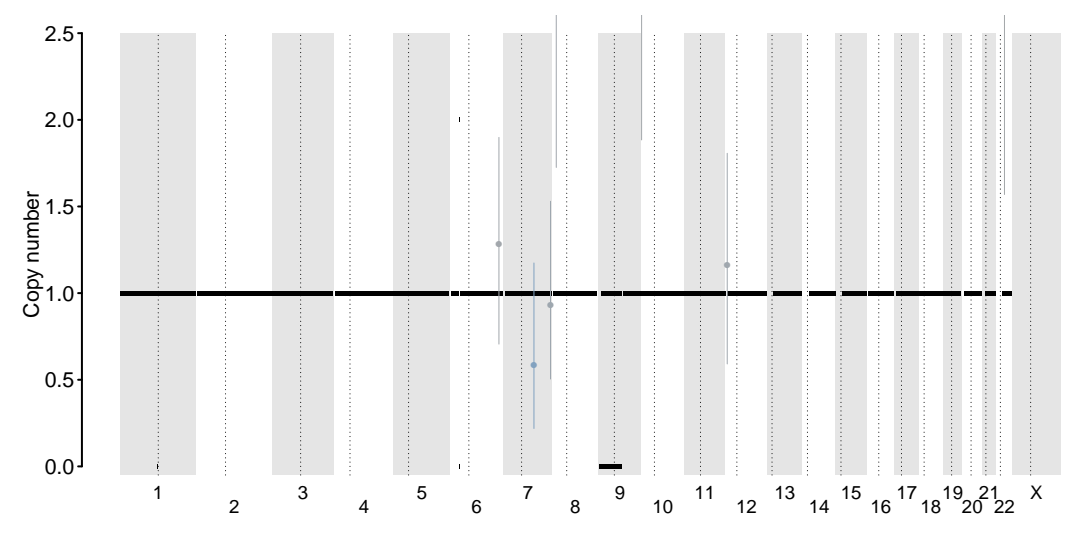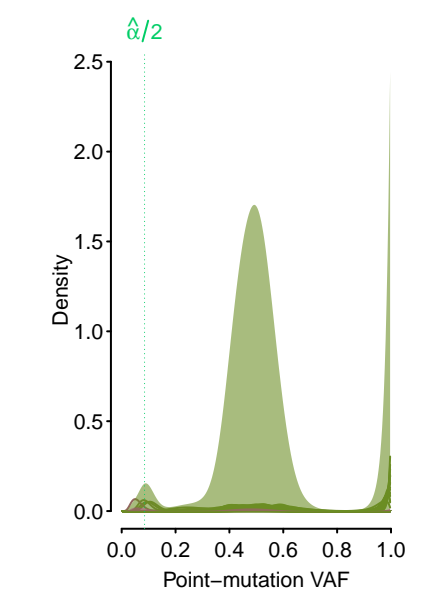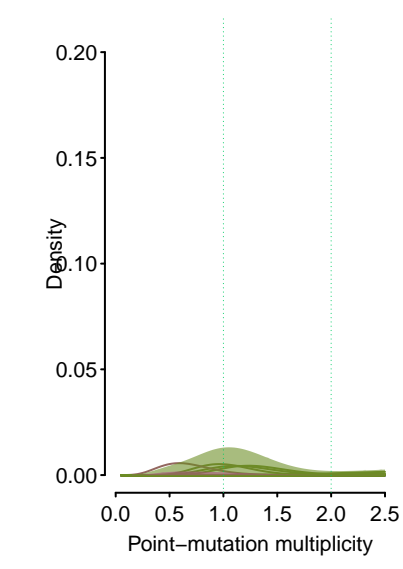



Sample 66

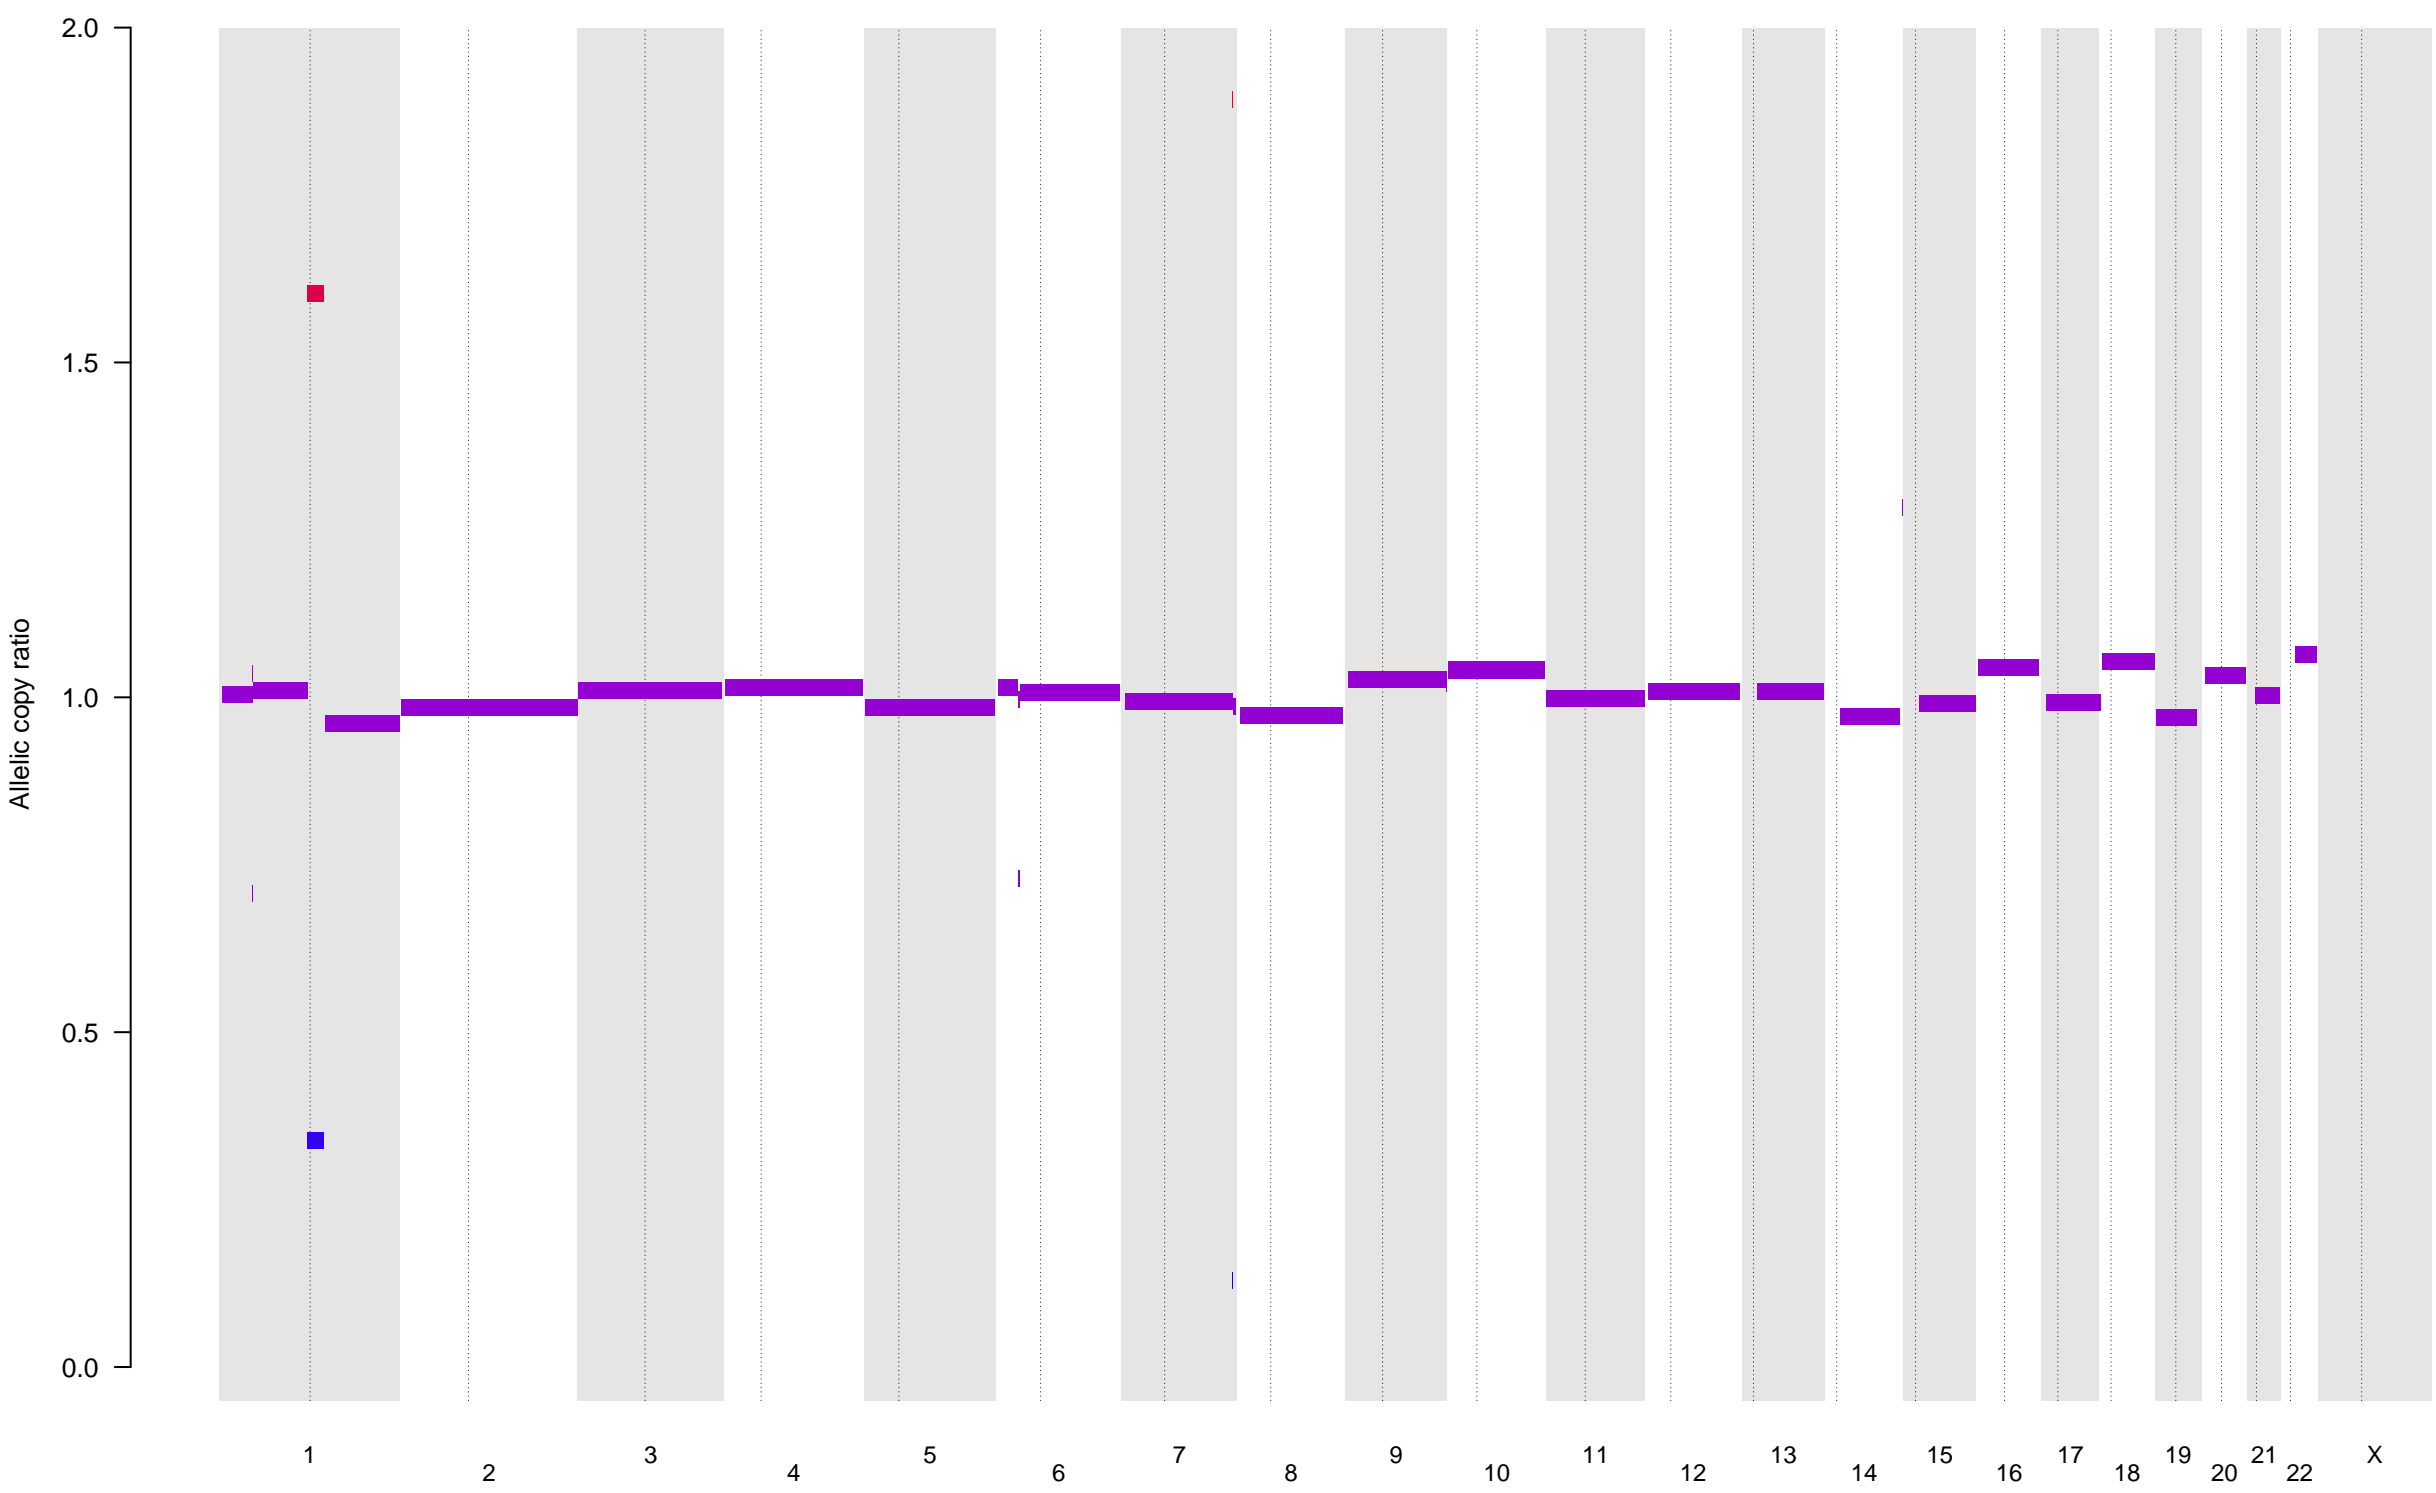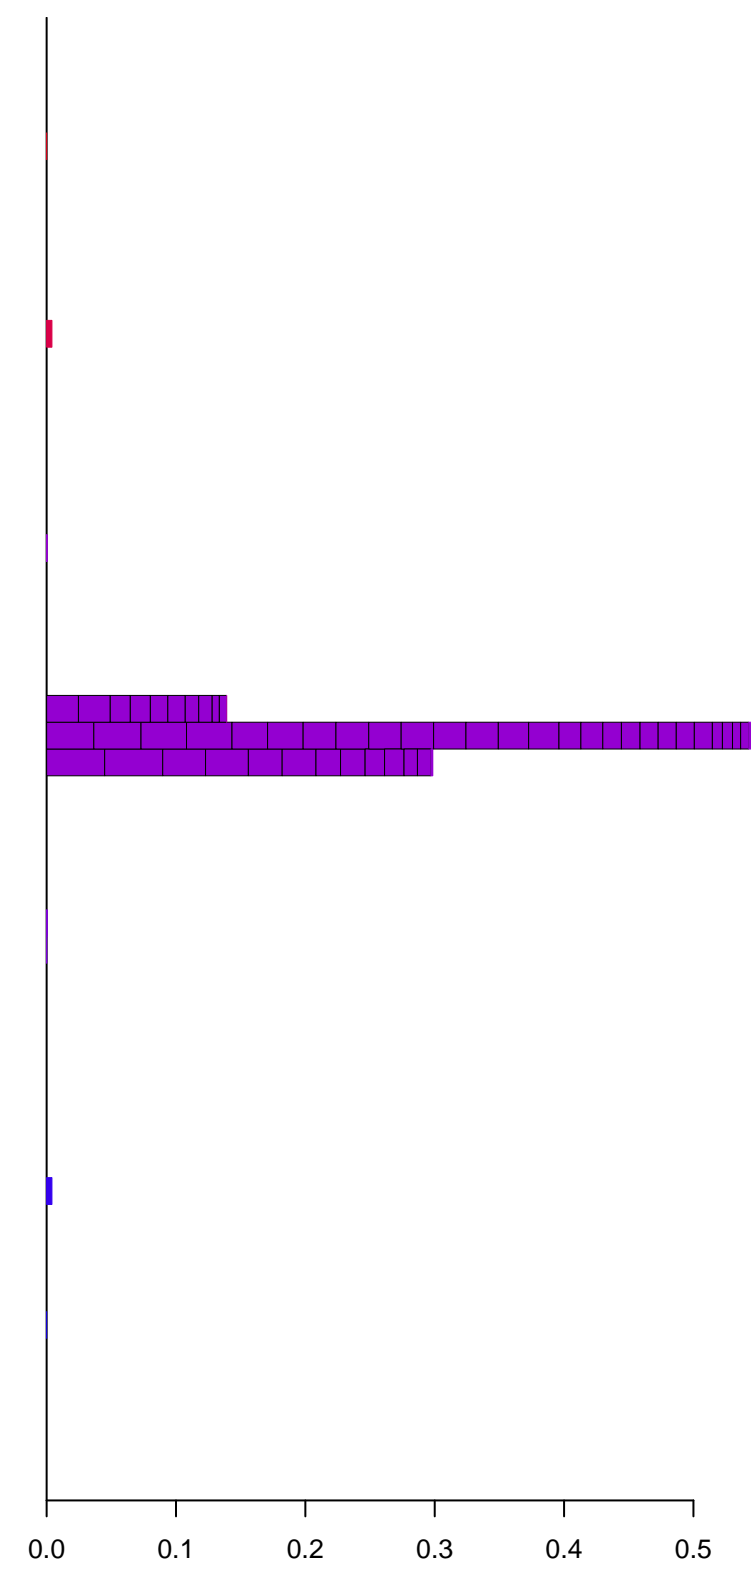

purity( $\hat{\alpha}$ ) = 0.3, ploidy:  $\hat{t} = 1.99$ ,  $\hat{t}_g = 2.01$   
 $\theta_z = 0$ ,  $\theta_0 = 1.279$ , WGD=0  
 SCNA LL = -192.15, SSNV LL = -9622.84, SCNA Ev = -29.60161

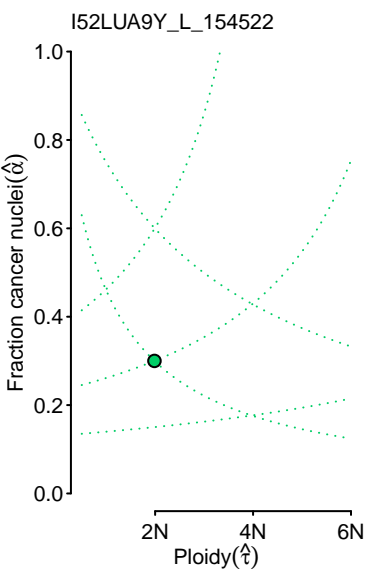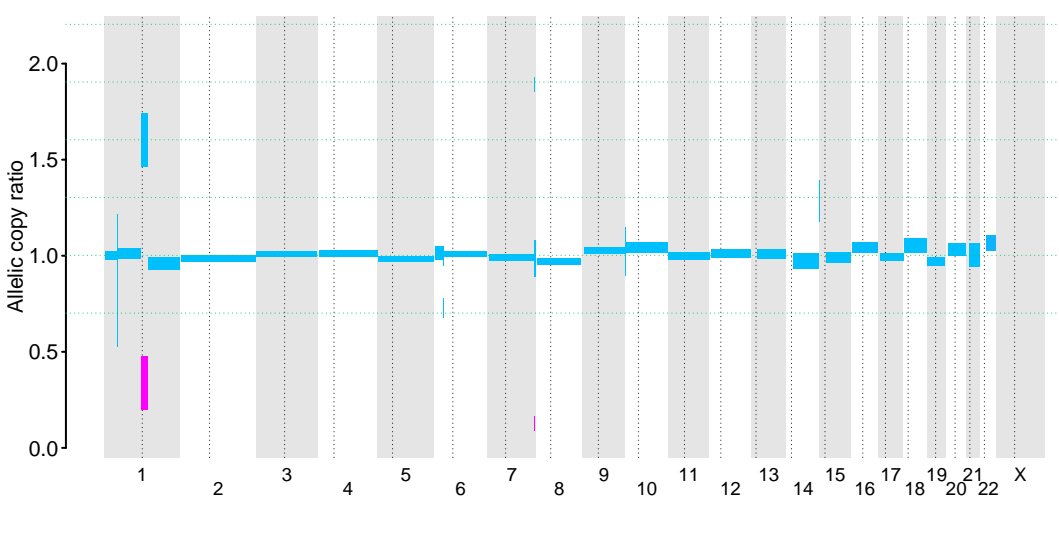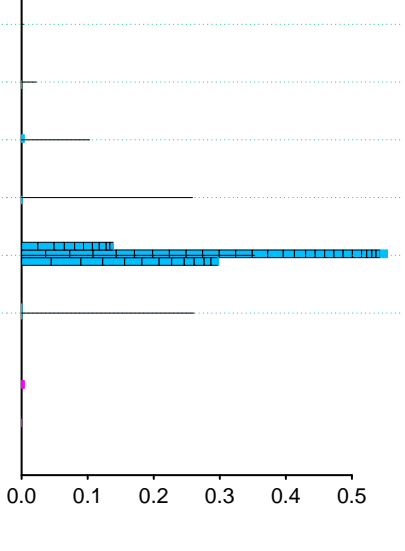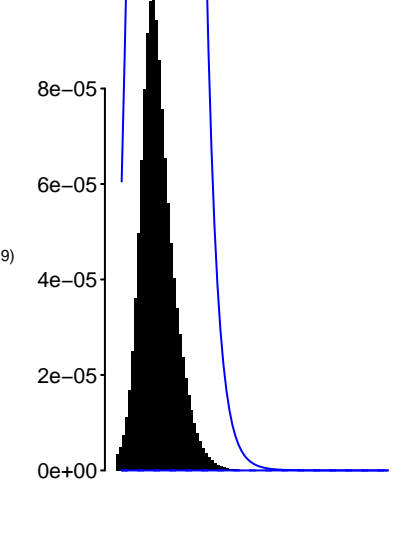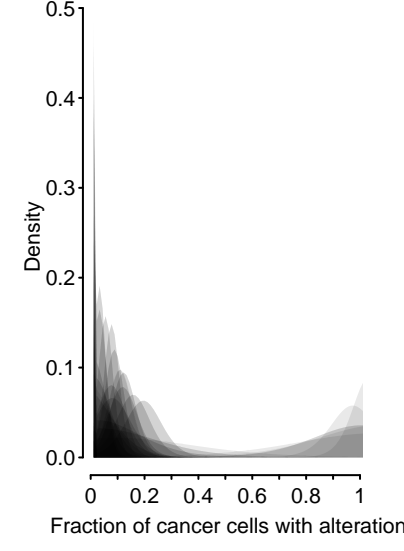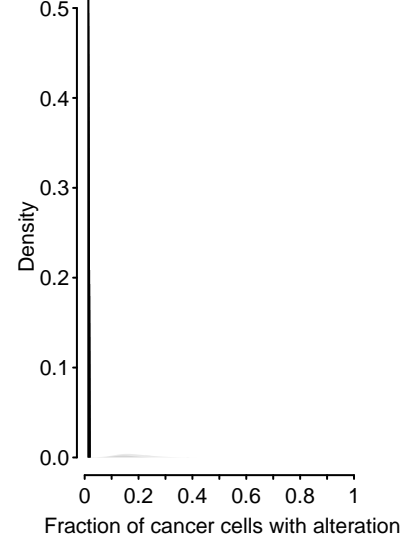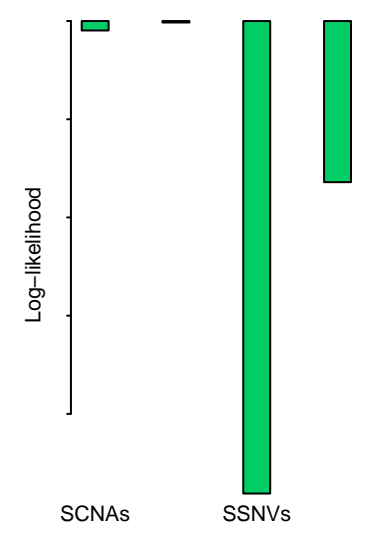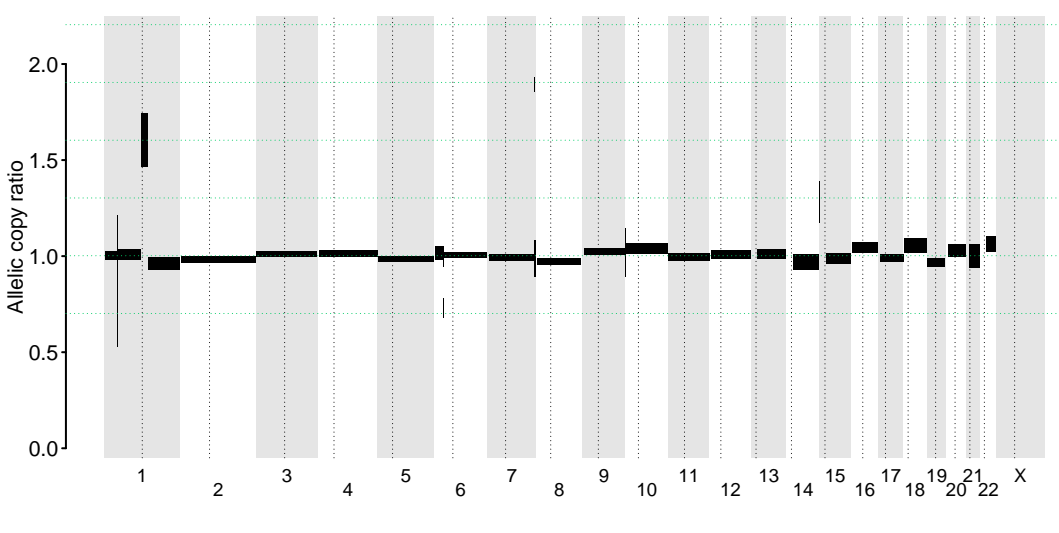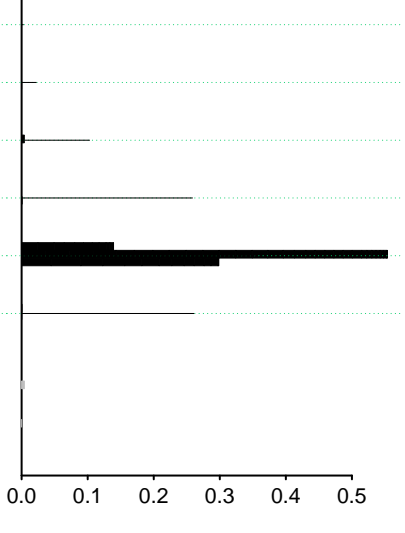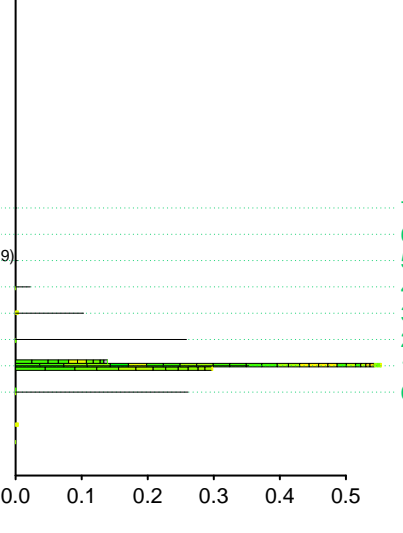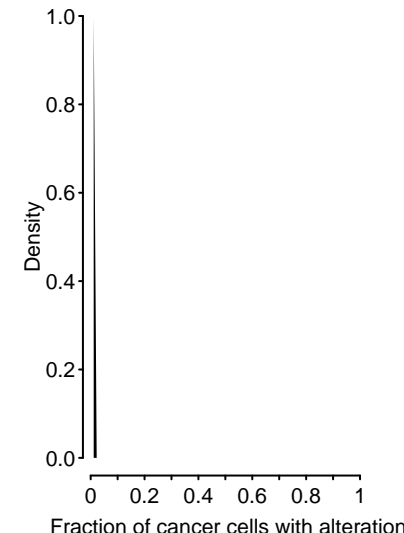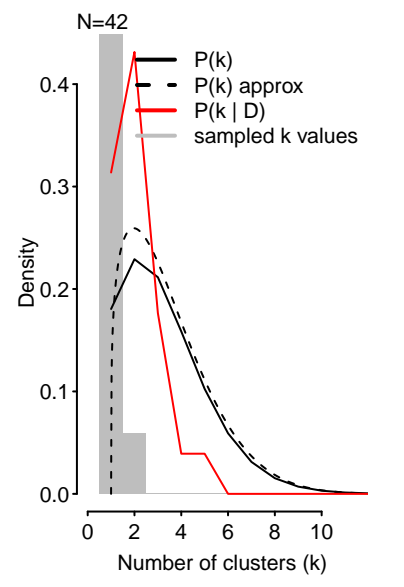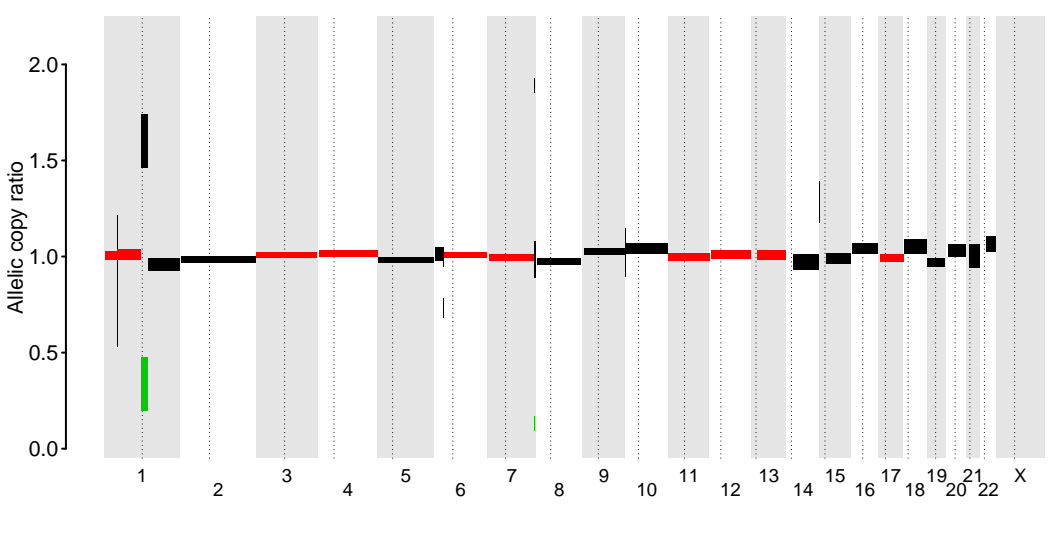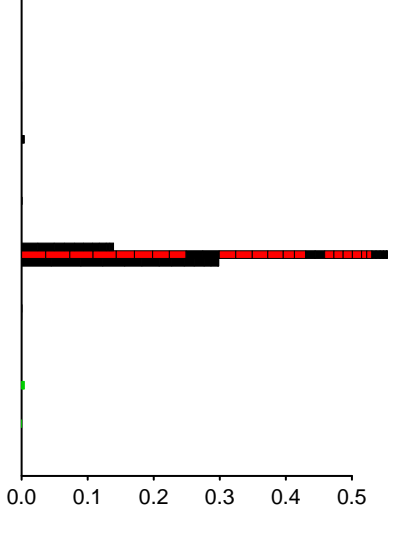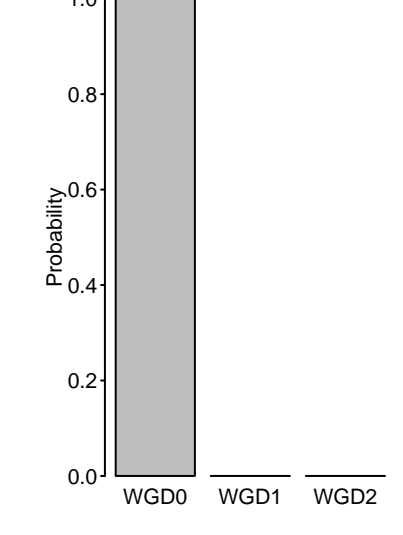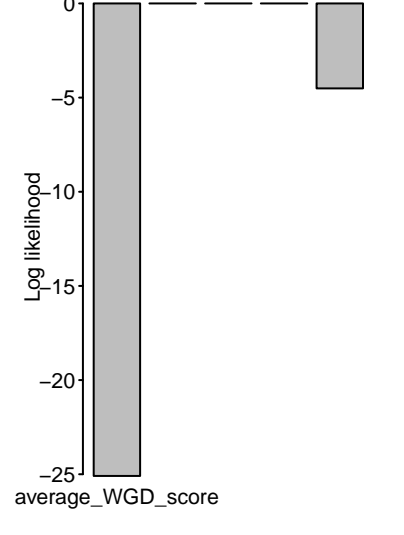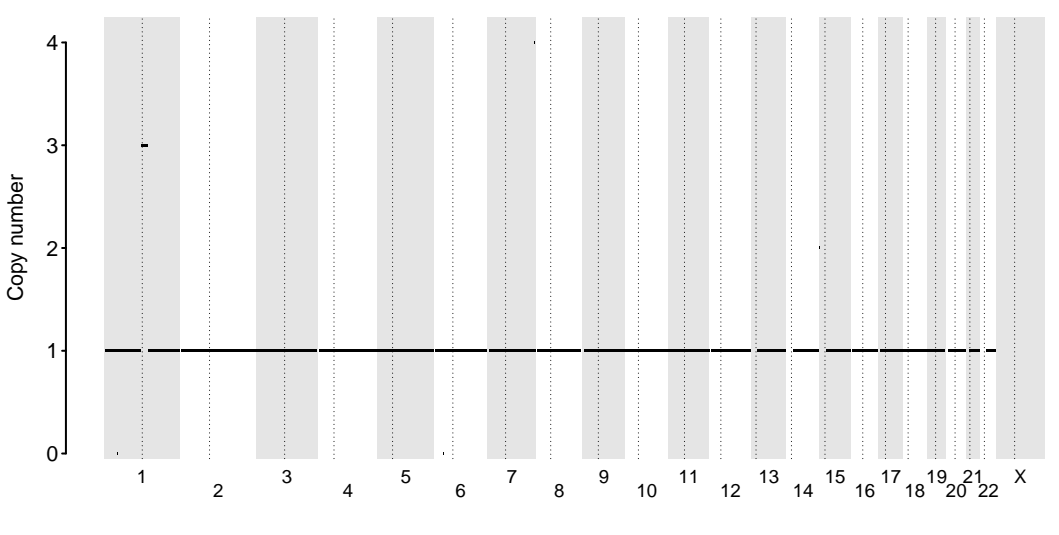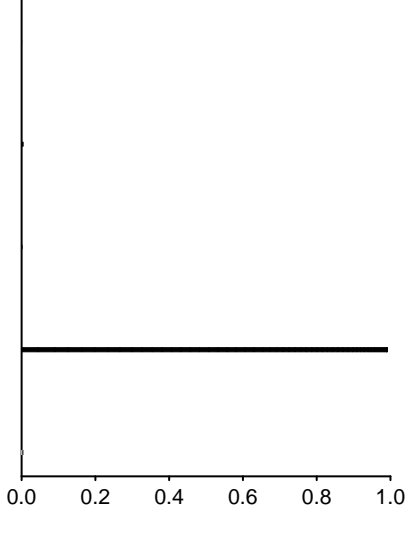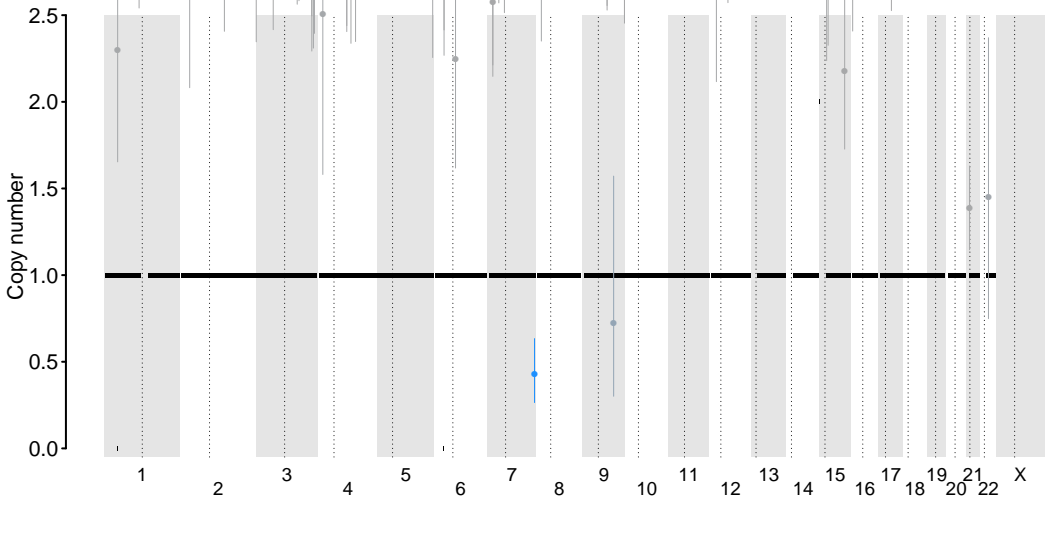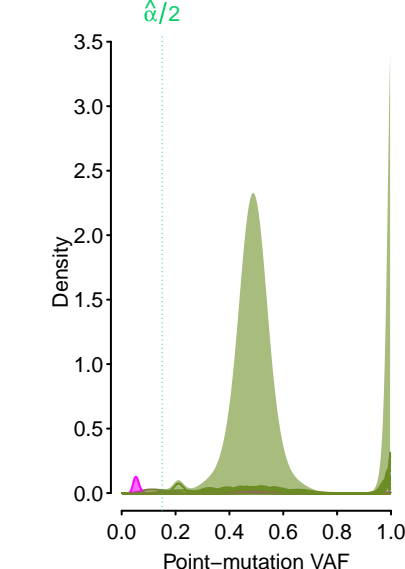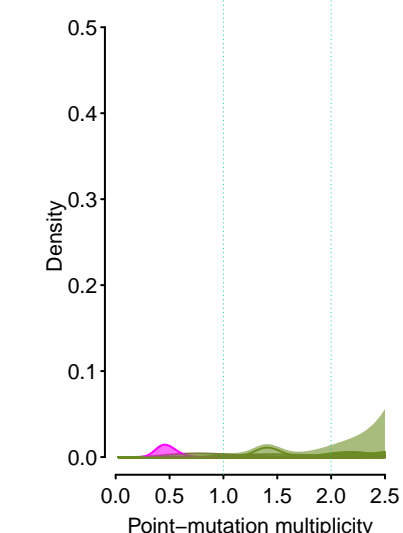

Sample 67

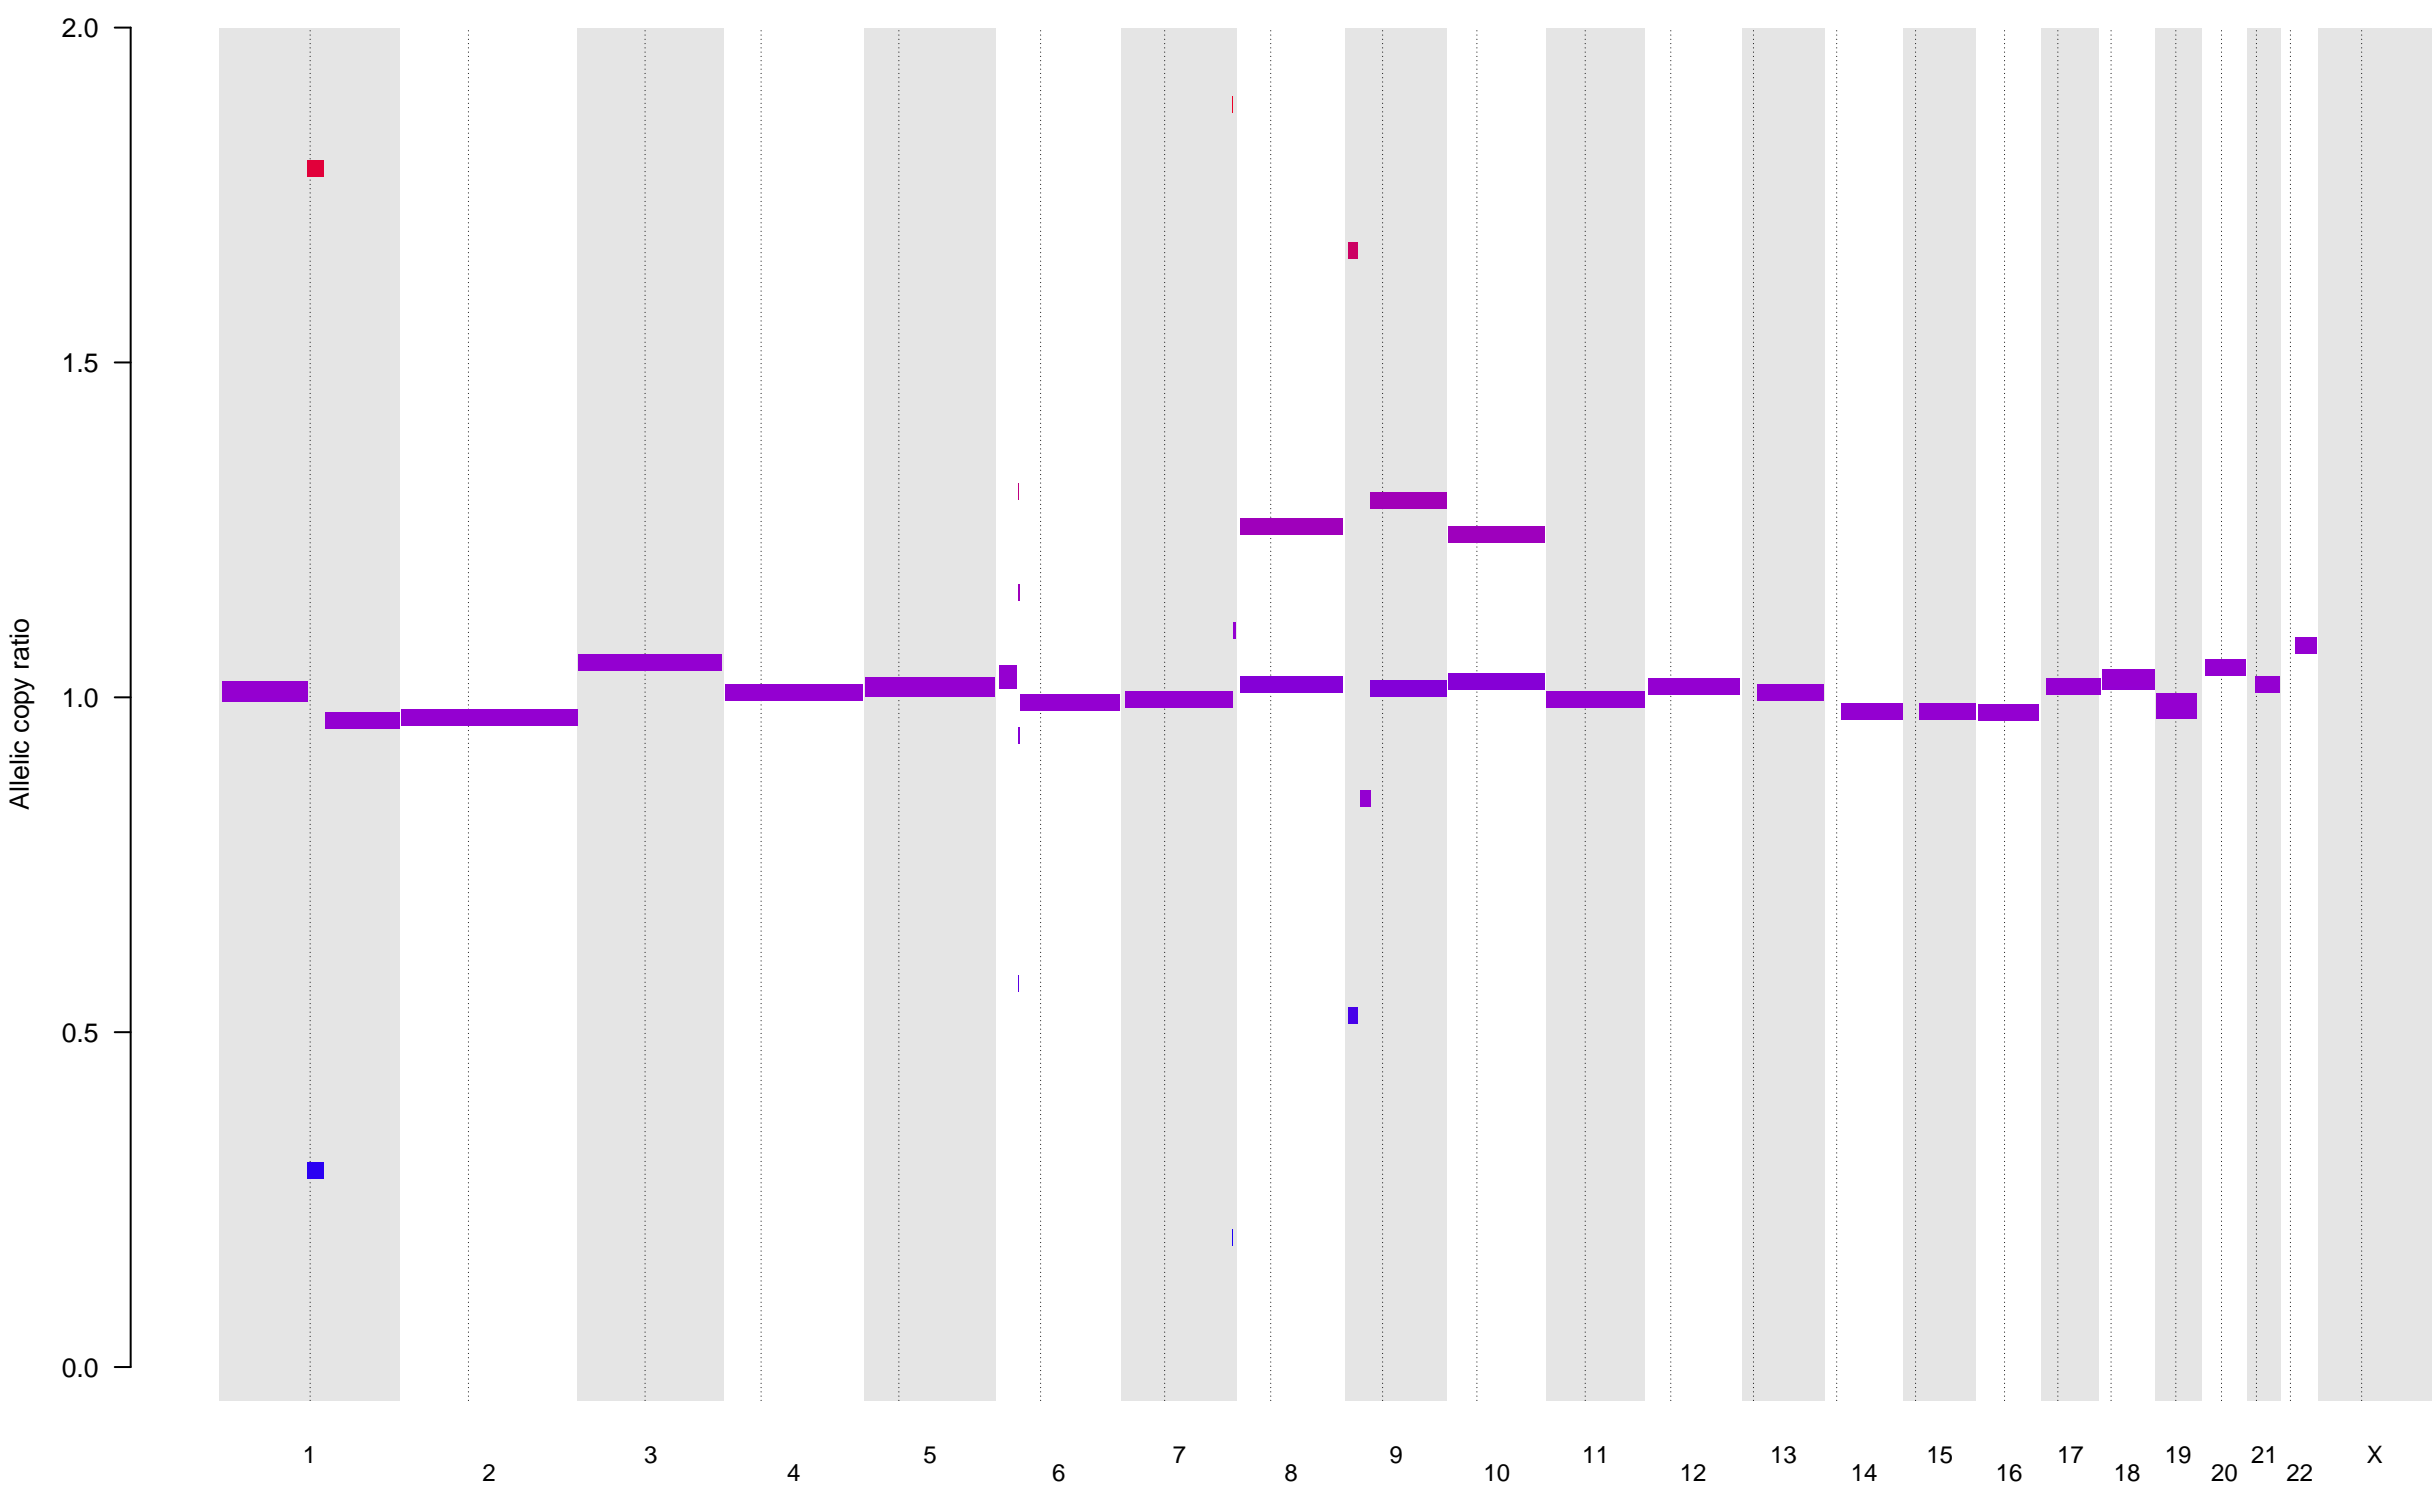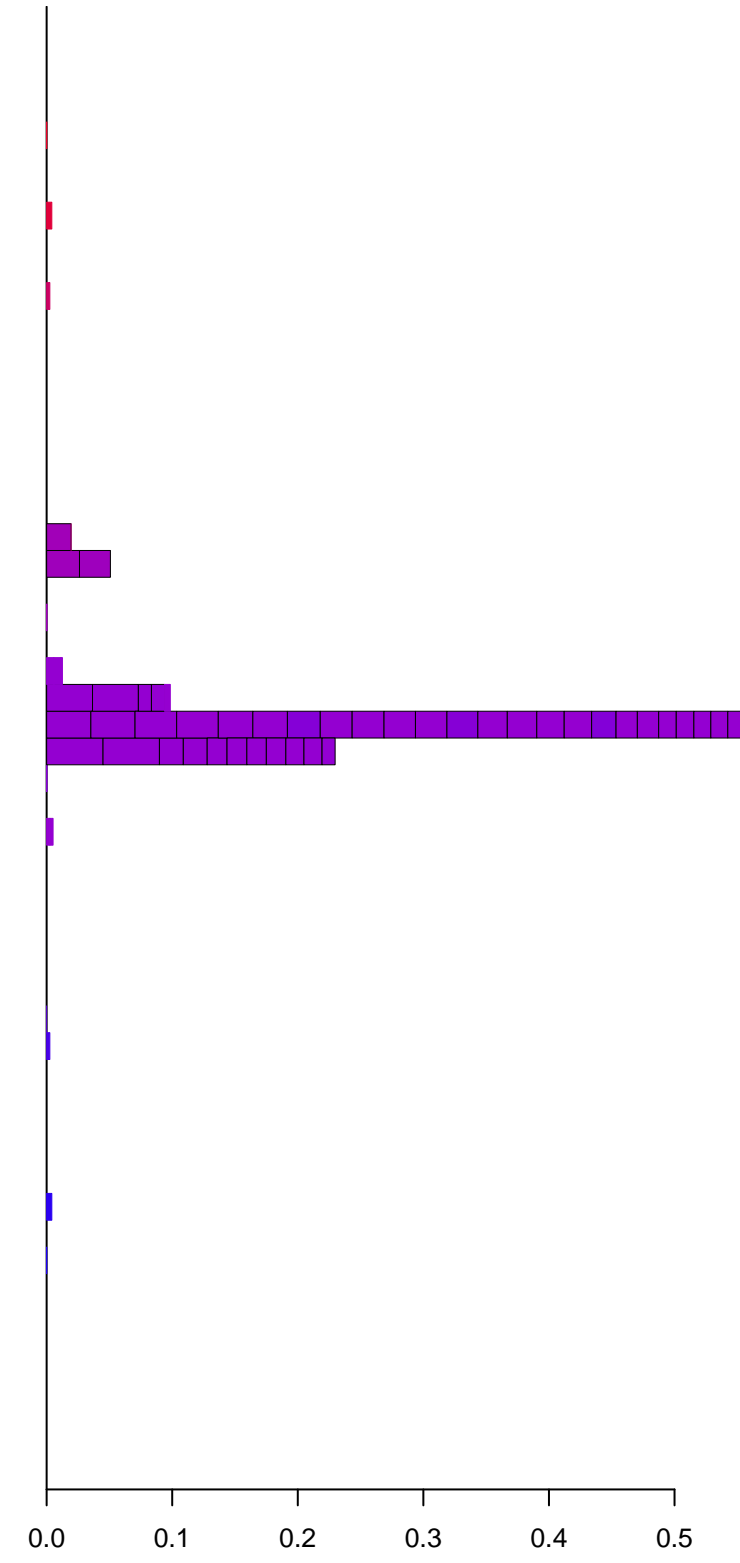

$\hat{\alpha} = 0.24$ , ploidy:  $\hat{\tau} = 1.98$ ,  $\hat{\tau}_g = 2.16$   
 $\hat{\theta}_z = 0.12$ ,  $\hat{\theta}_Q = 1.615$ , WGD=0  
 SCNA LL = -237.4, SSNV LL = -6870.51, SCNA Ev = -68.08223

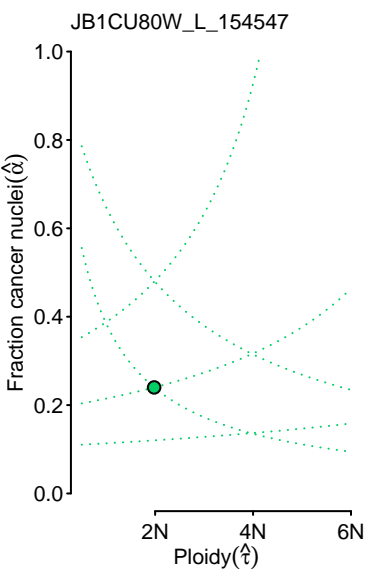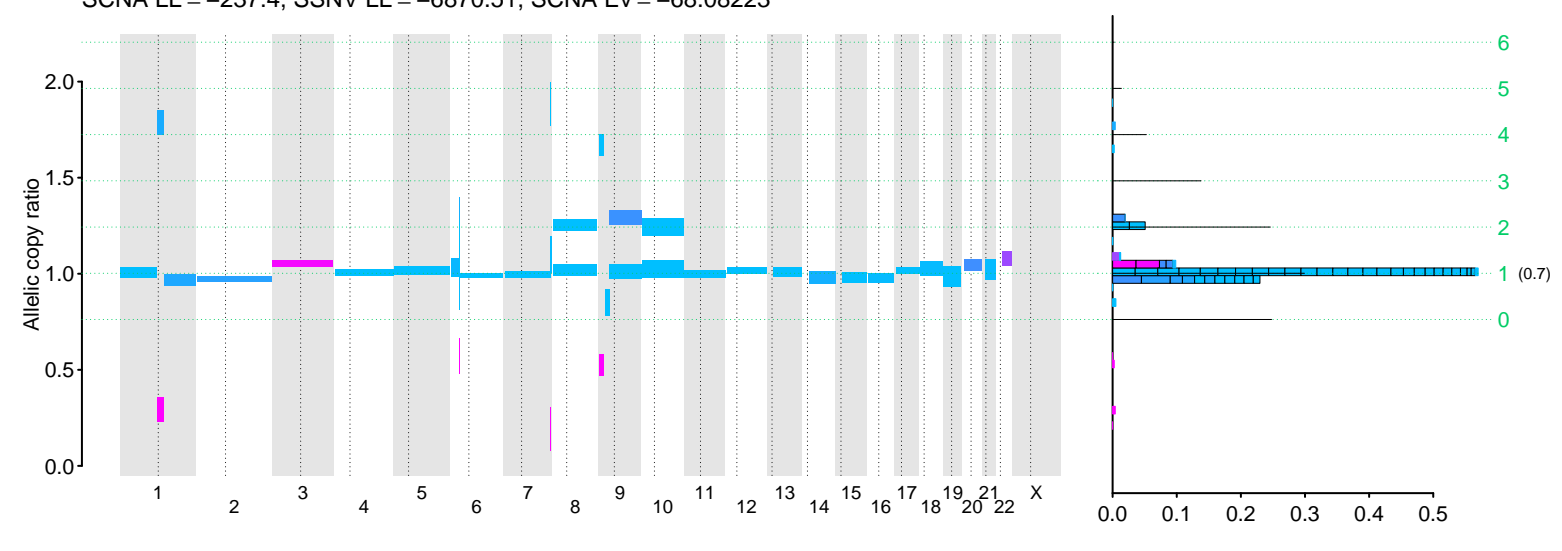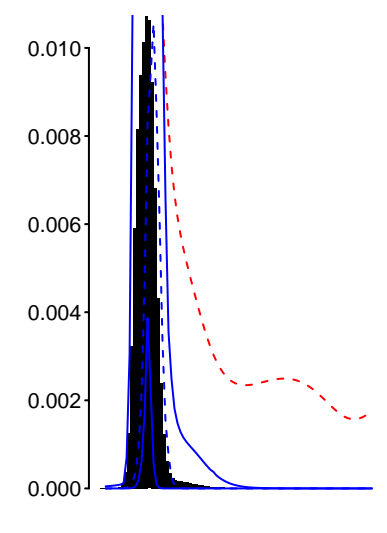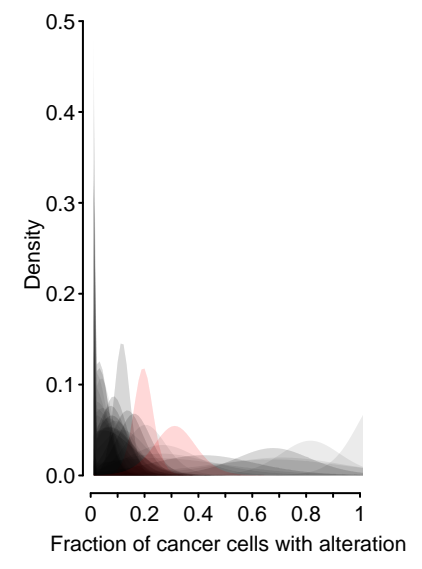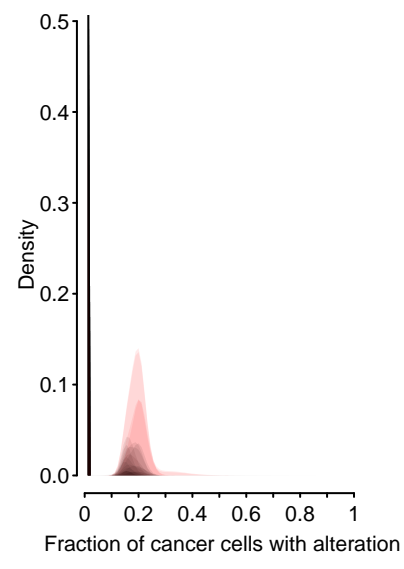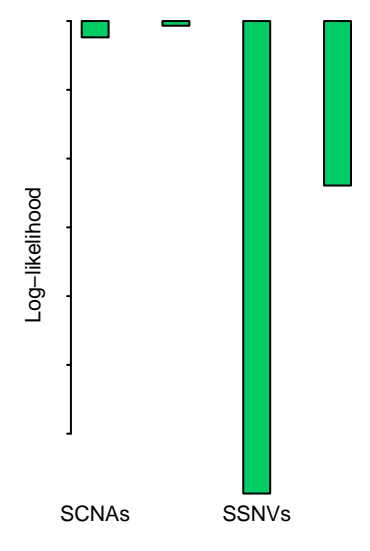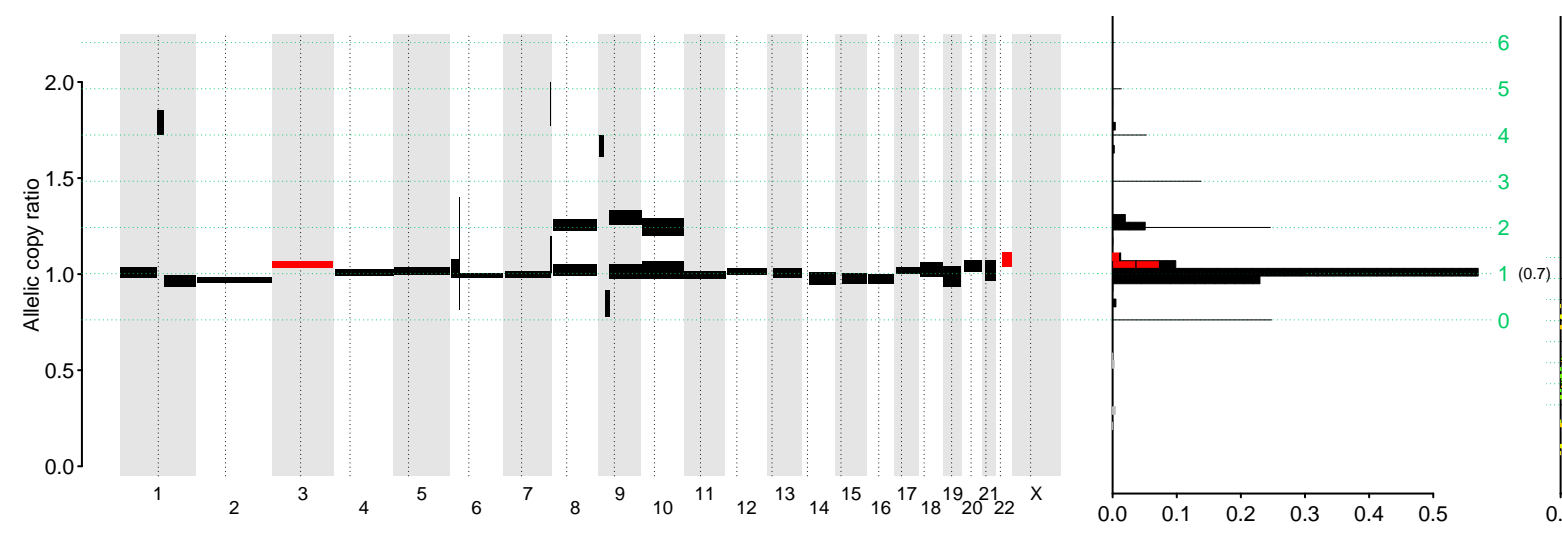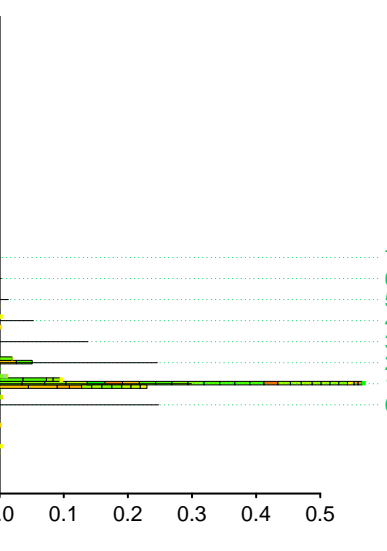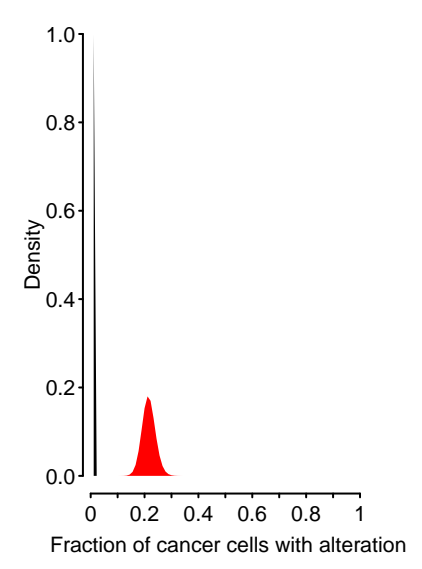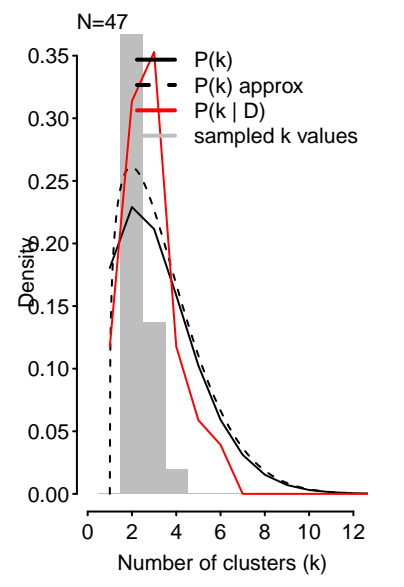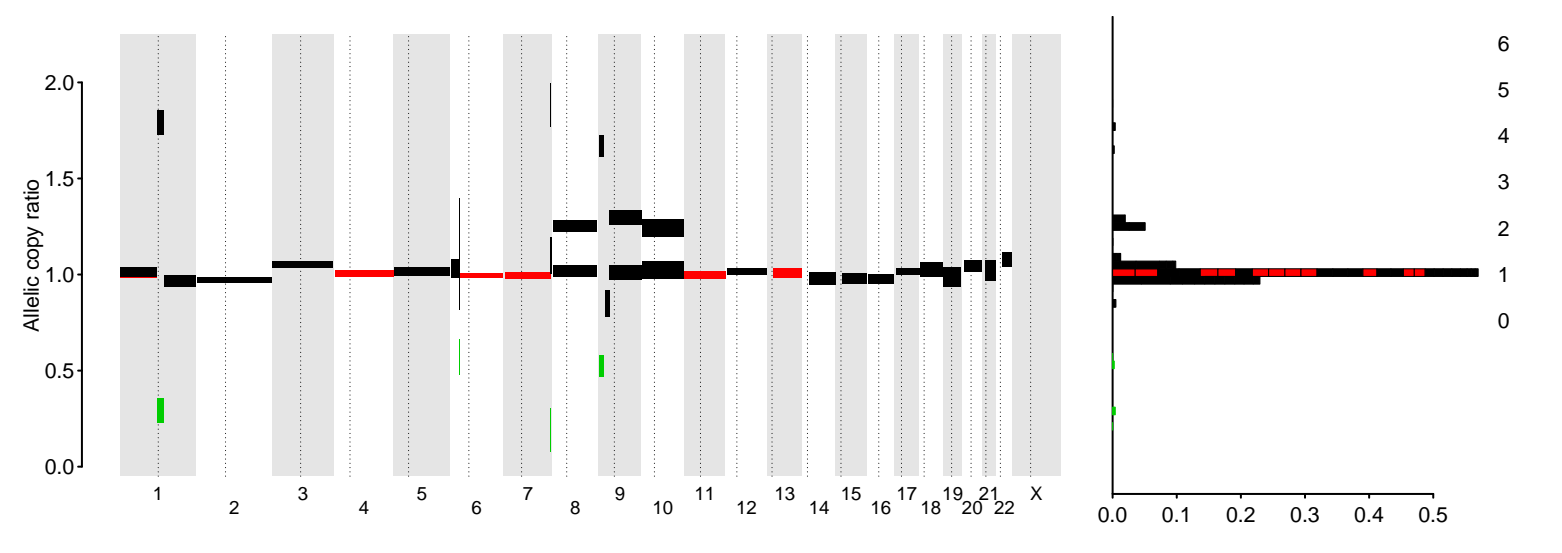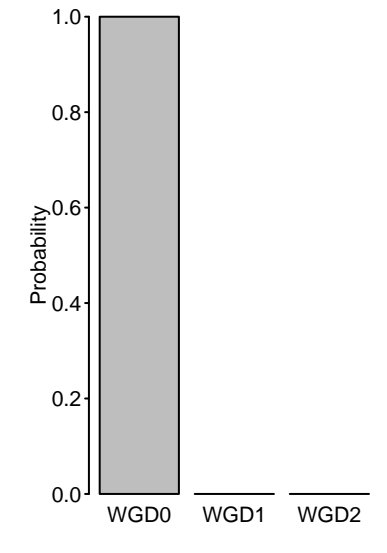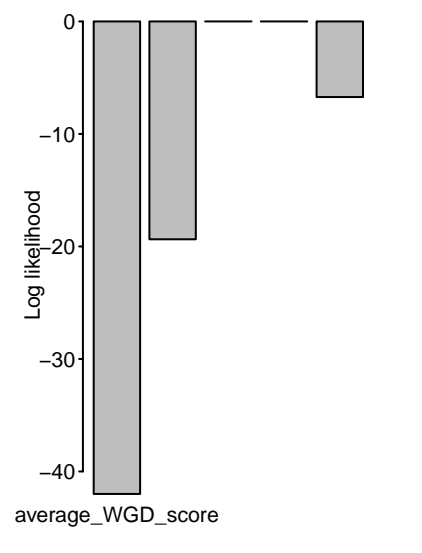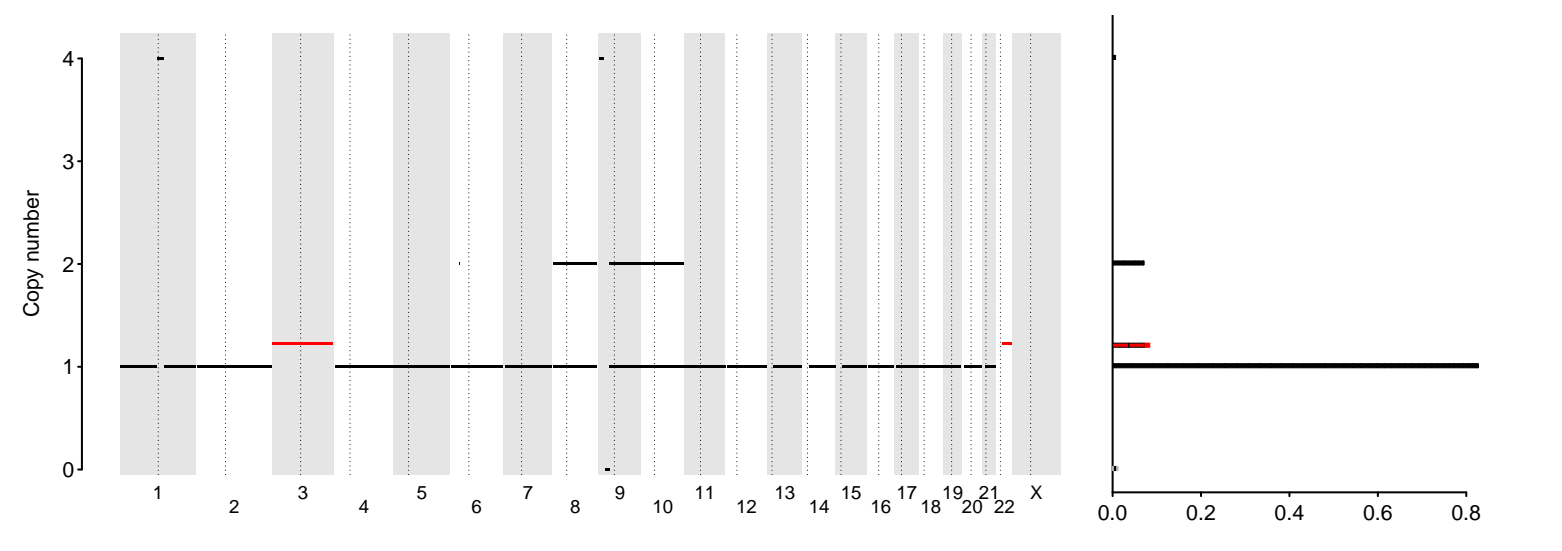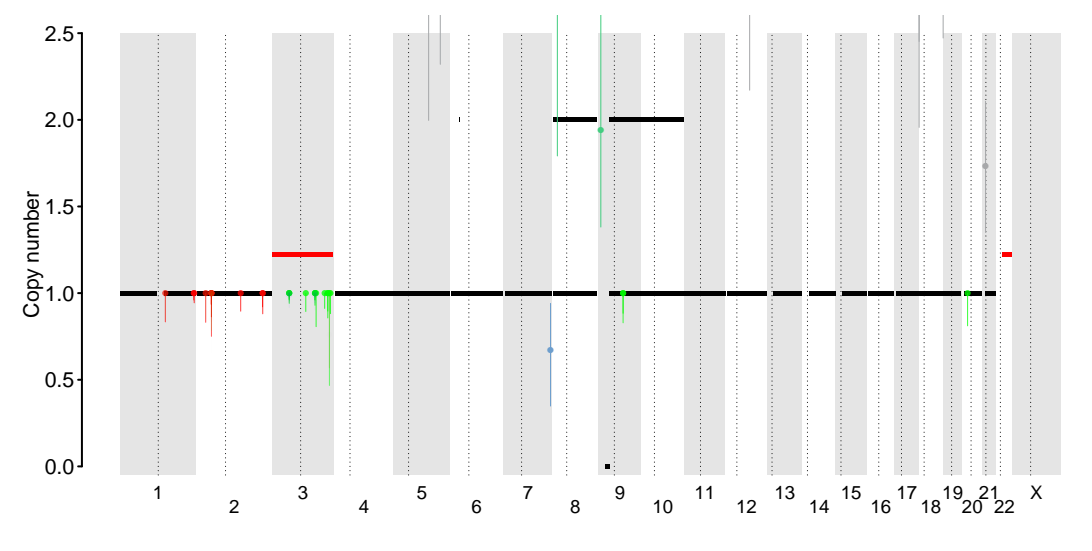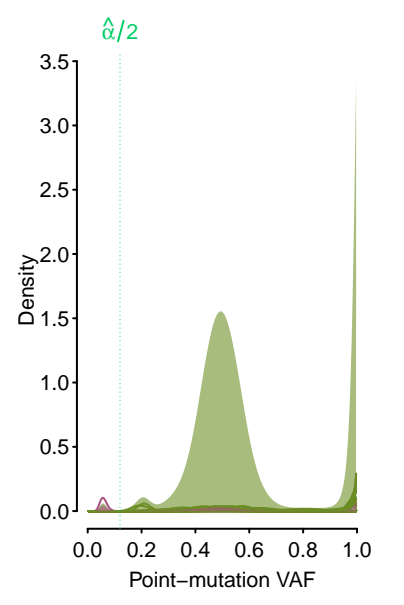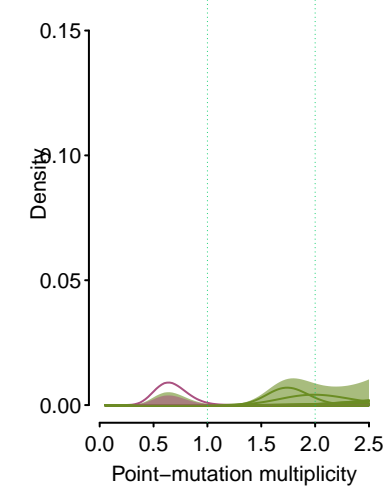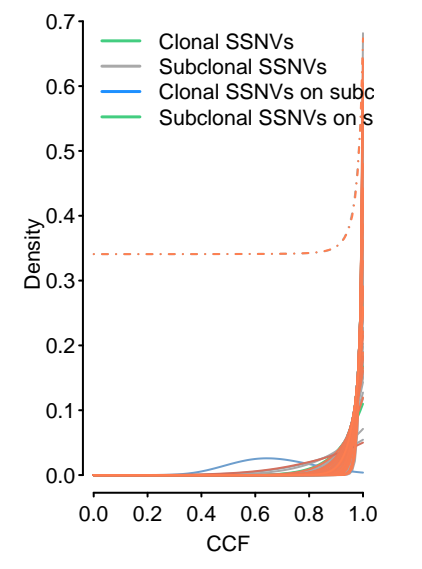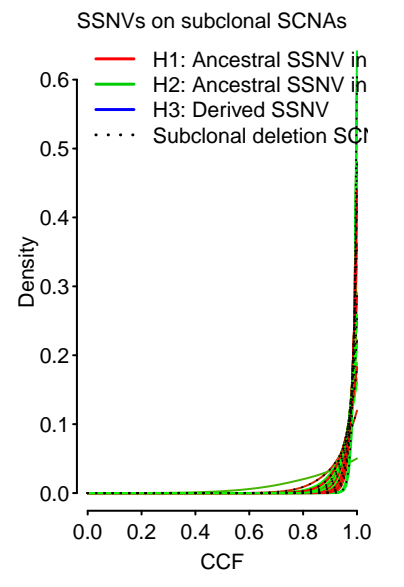

Sample 68

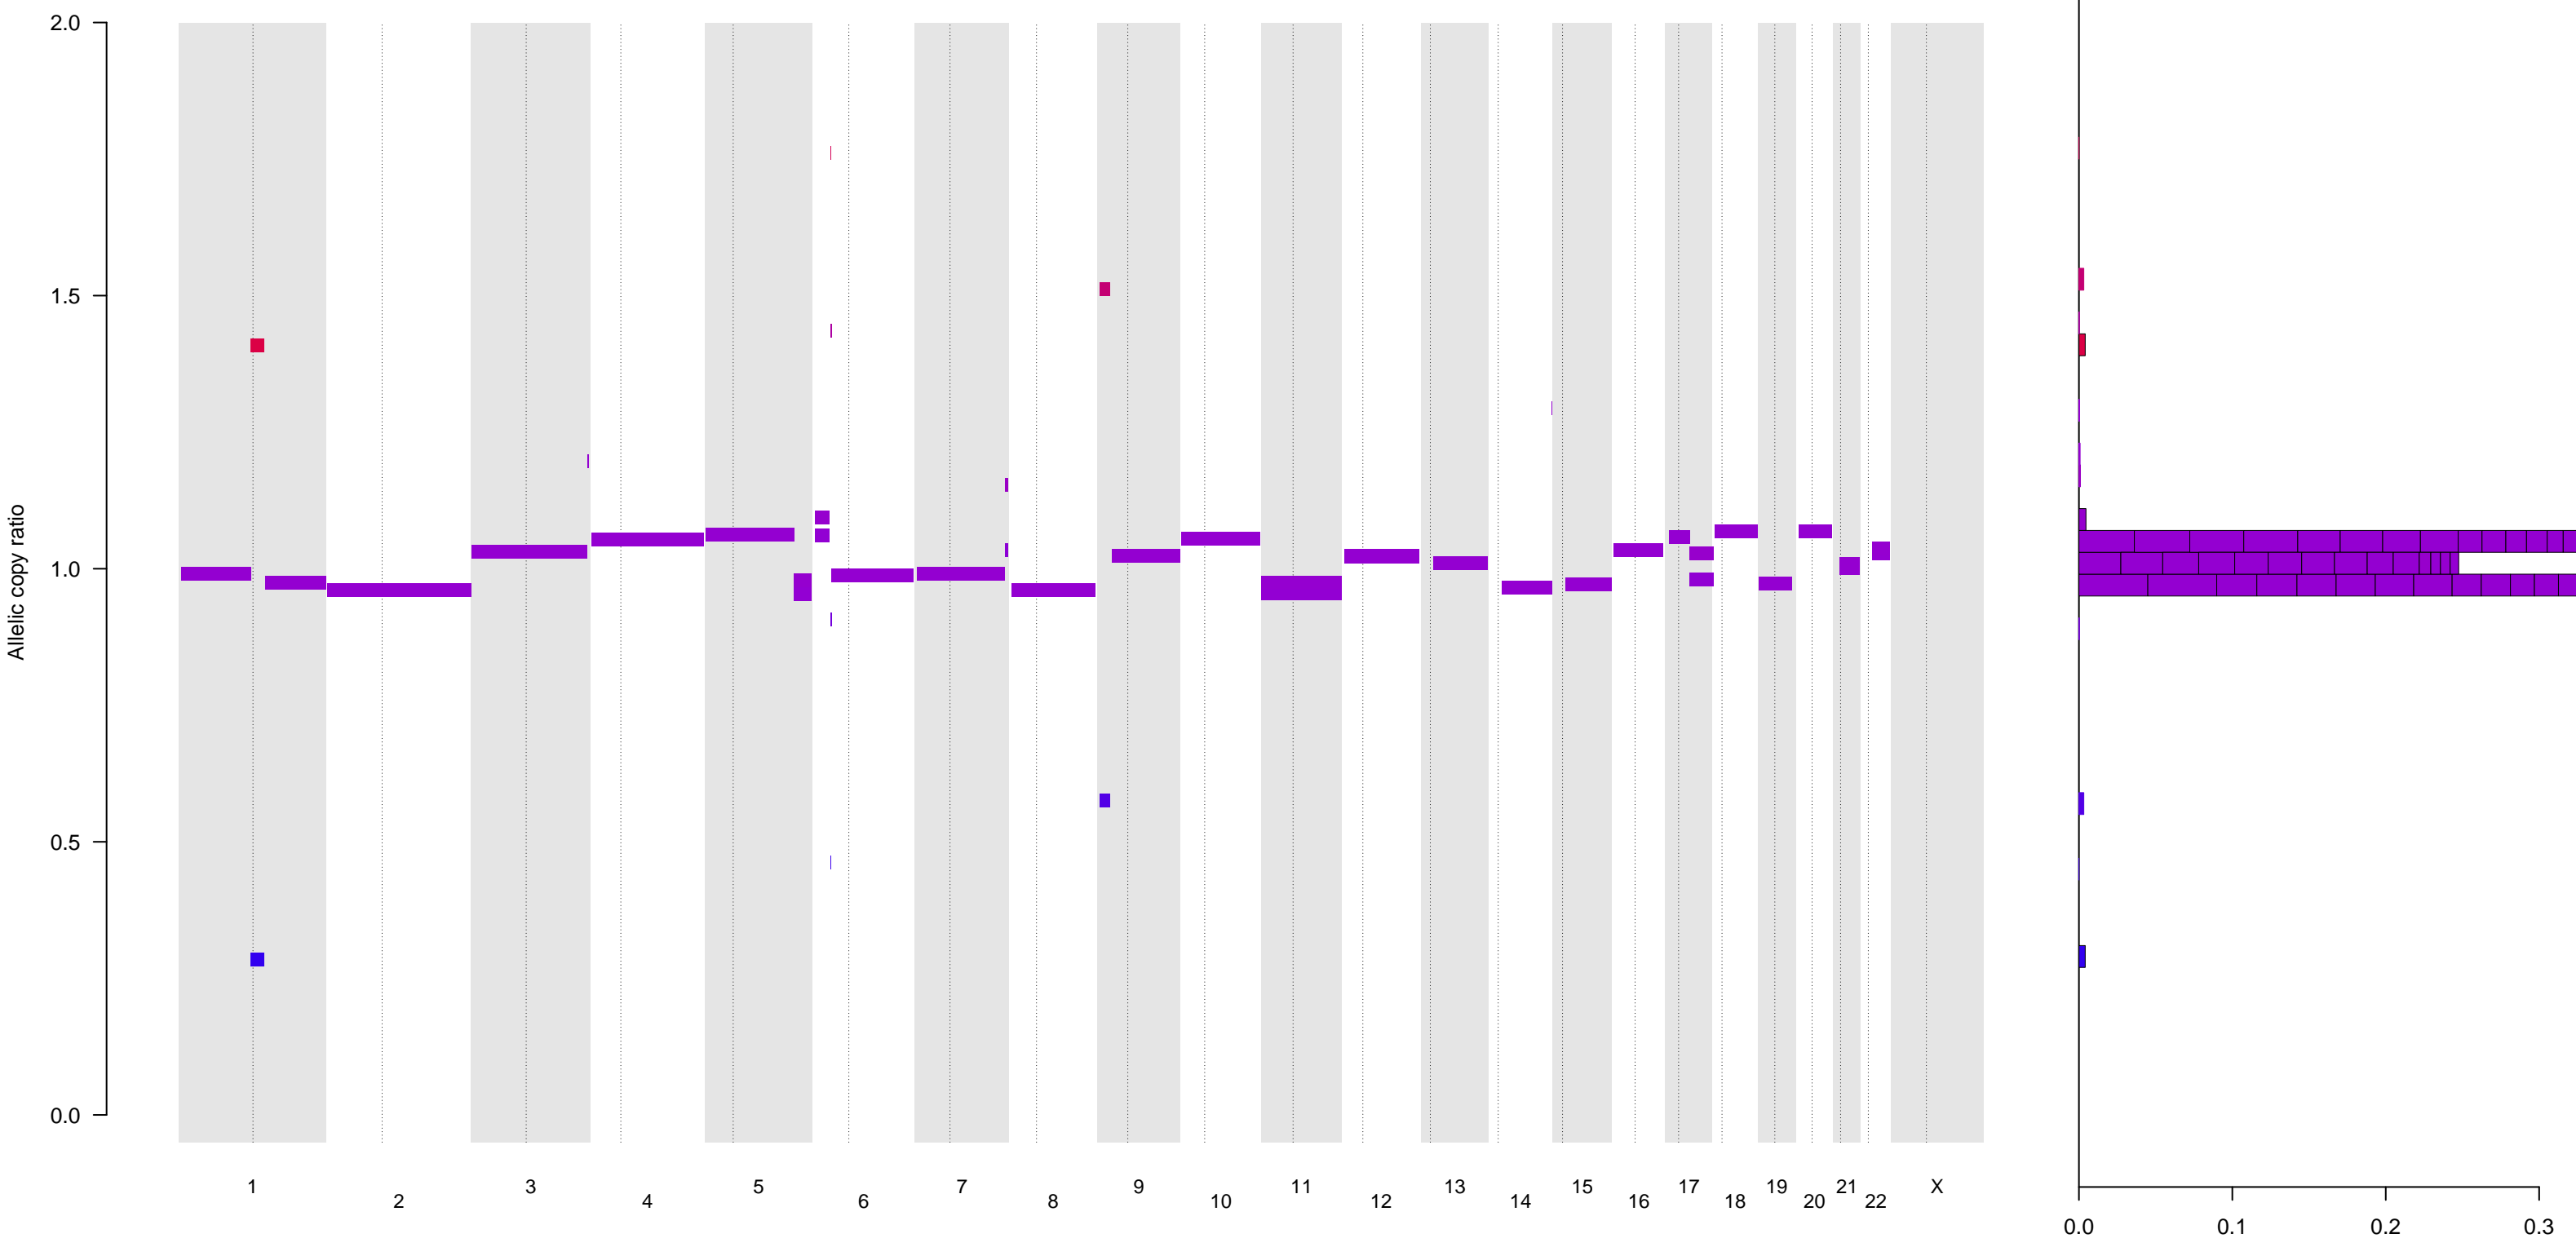

$\hat{\alpha} = 0.46$ , purity:  $\hat{\alpha} = 1.96$ ,  $\hat{\alpha}_g = 2$   
 $\theta_z = 0.33$ ,  $\theta_G = 1.229$ , WGD=0  
 SCNA LL = -232.01, SSNV LL = -4216.45, SCNA Ev = -105.0828

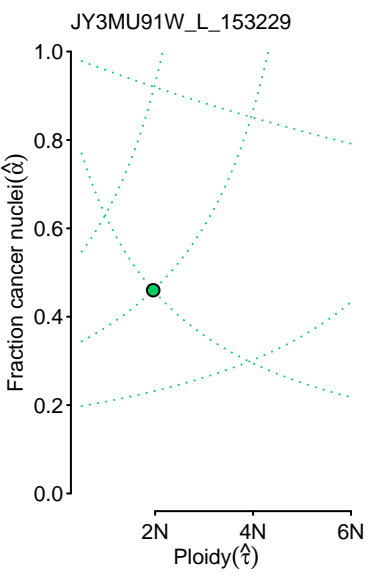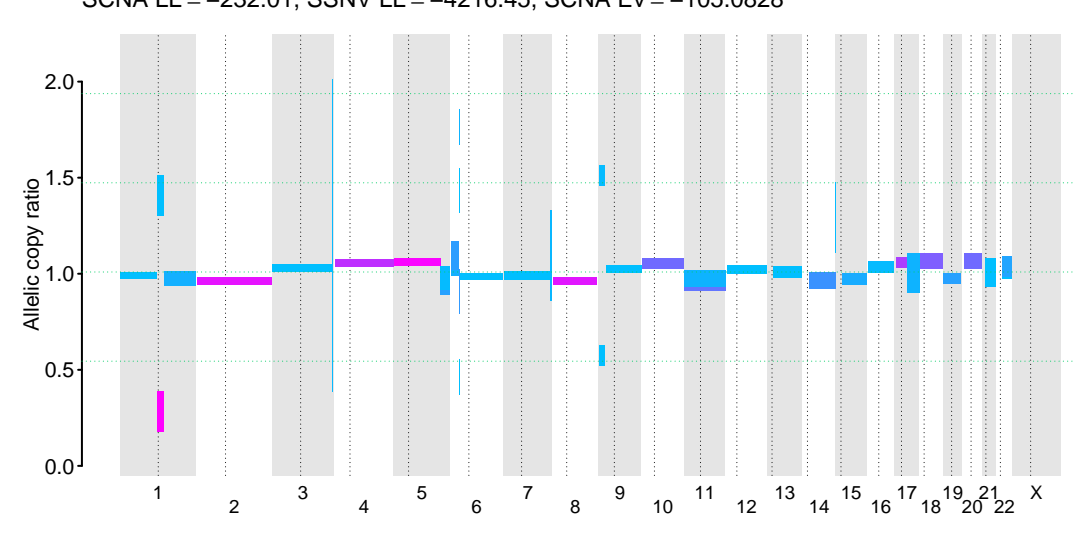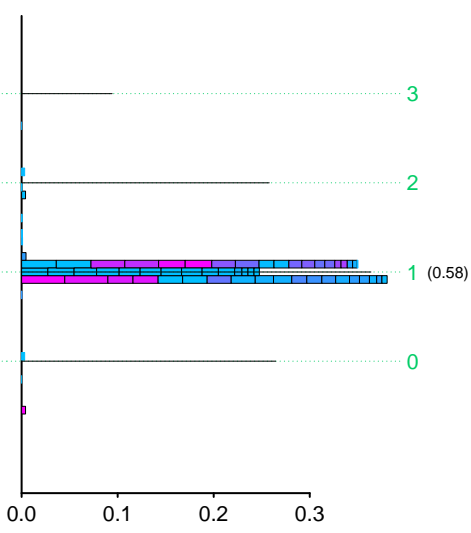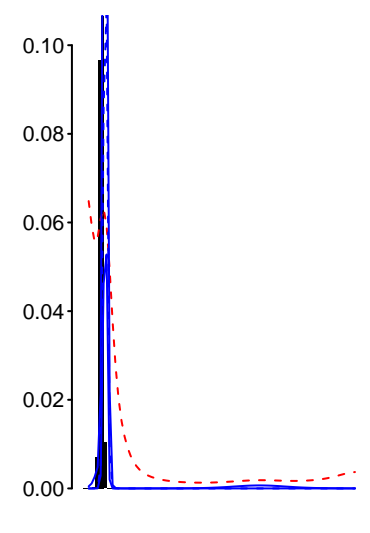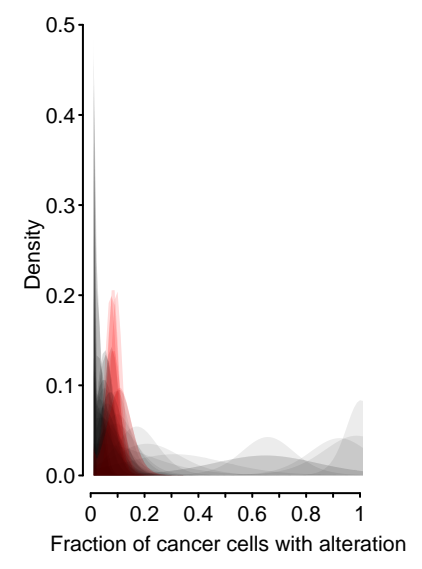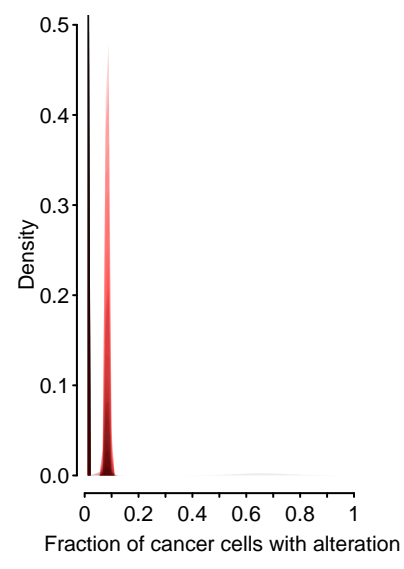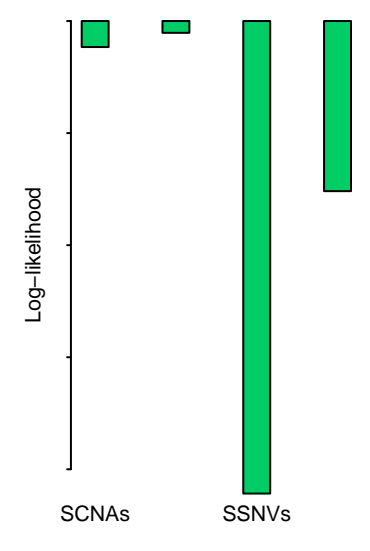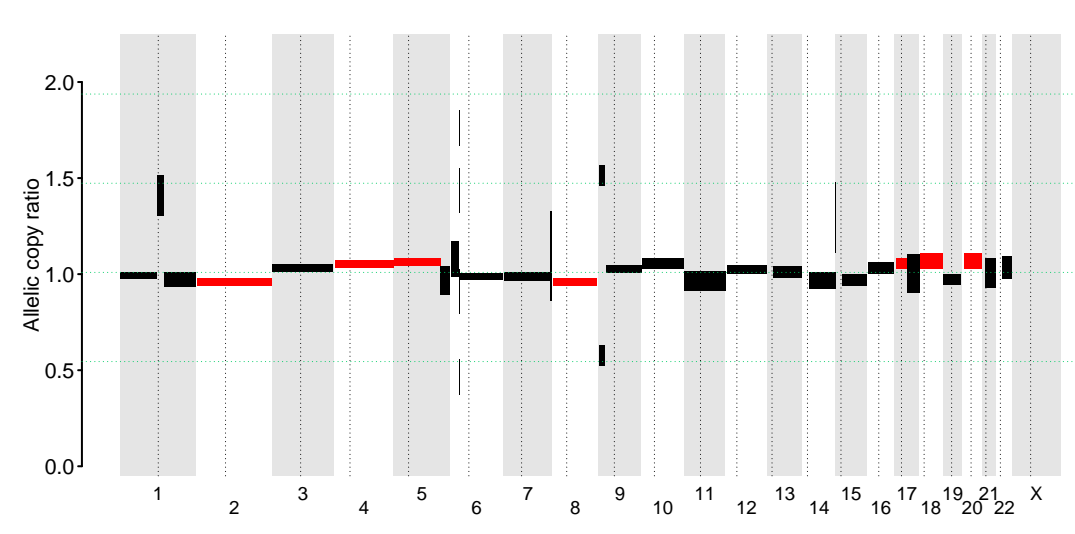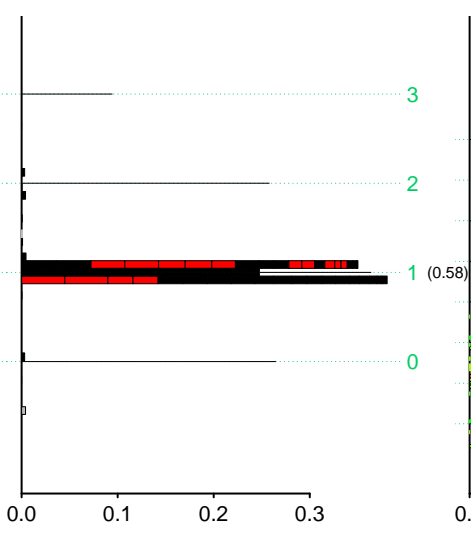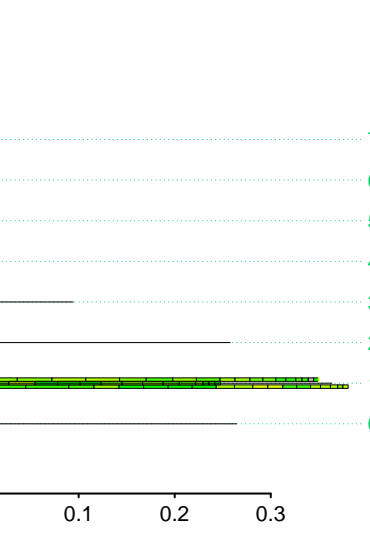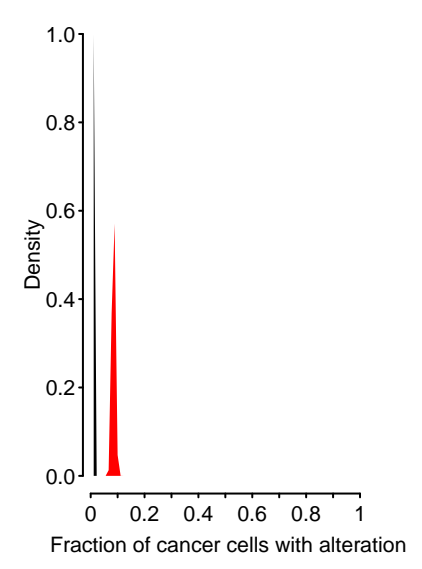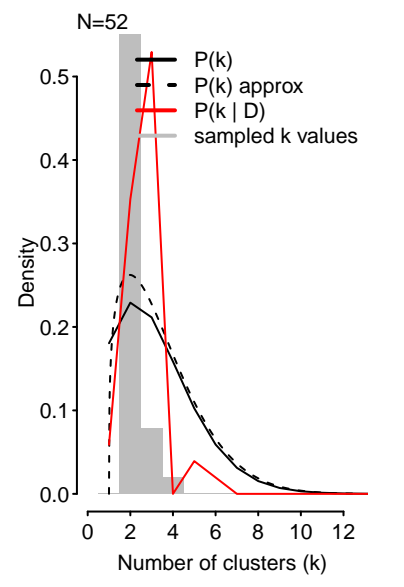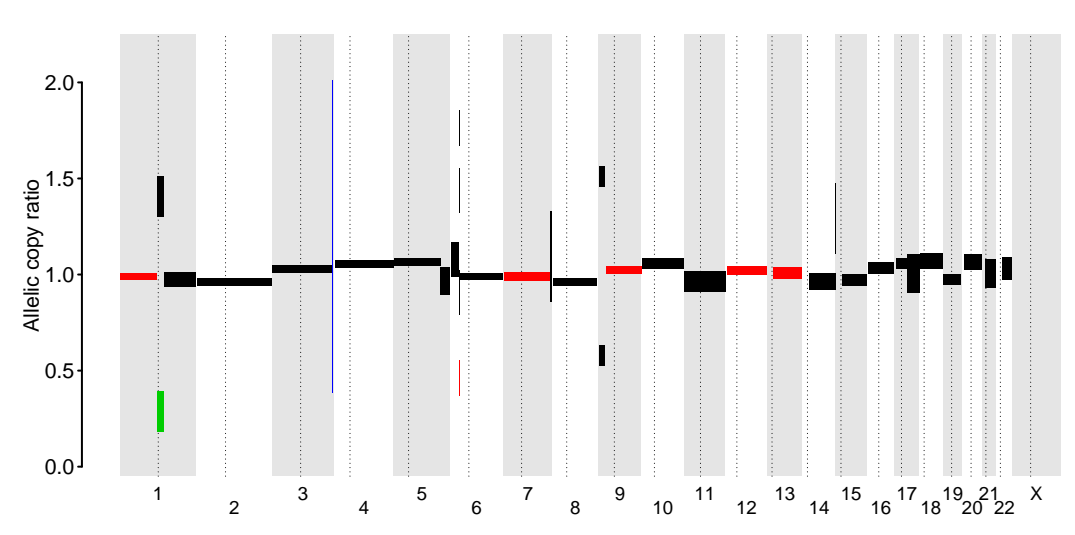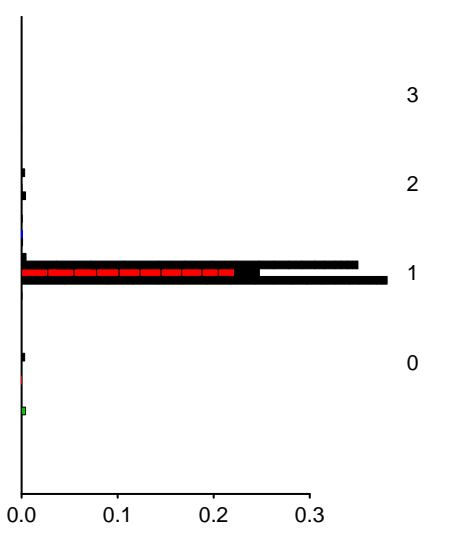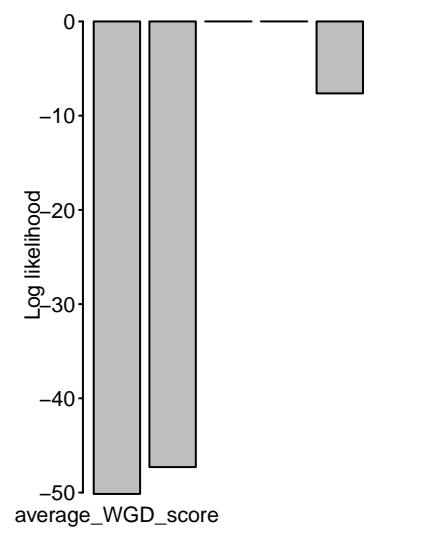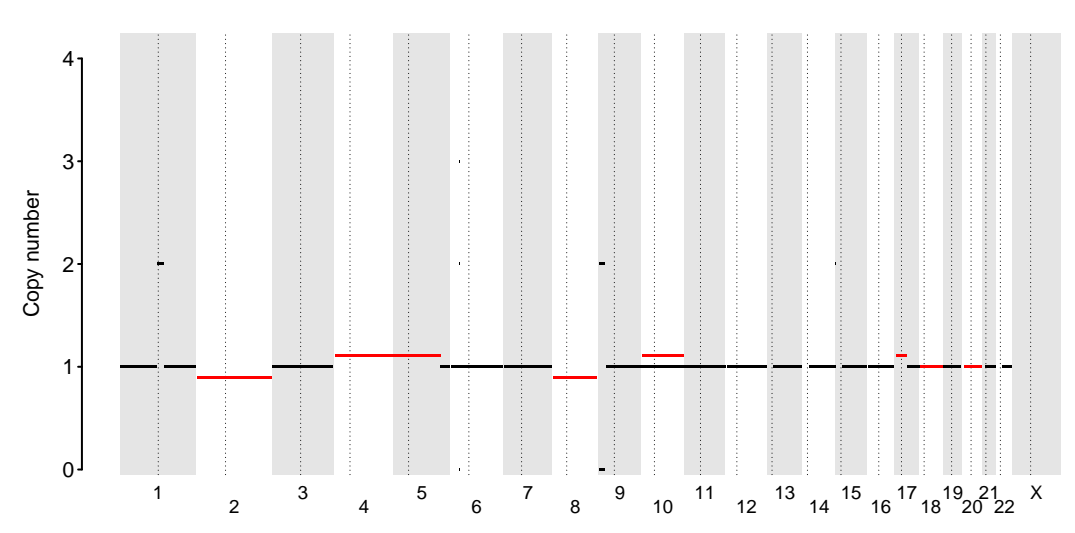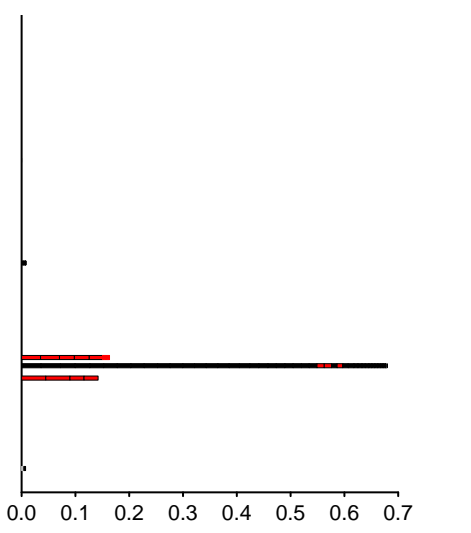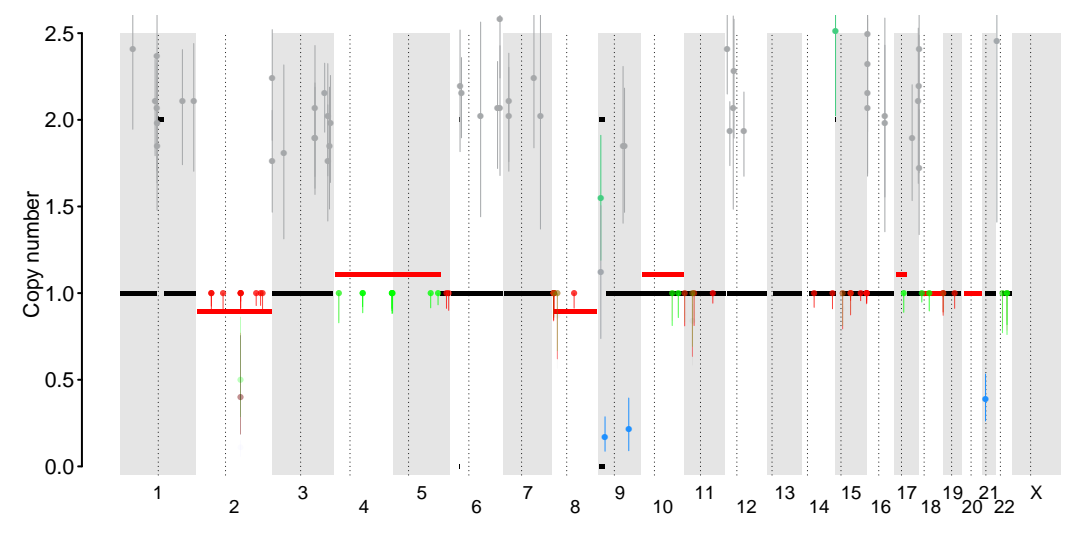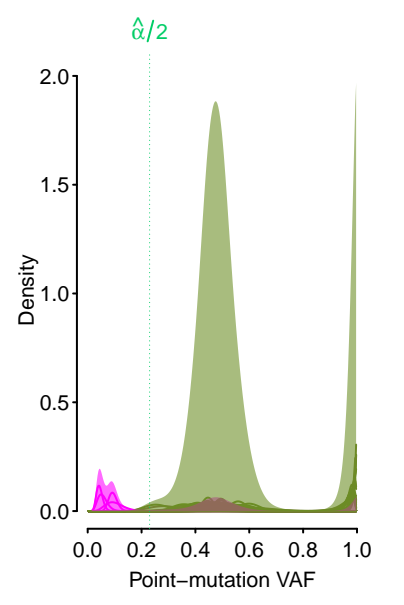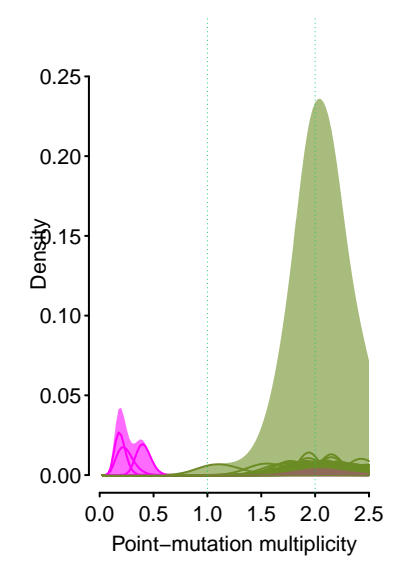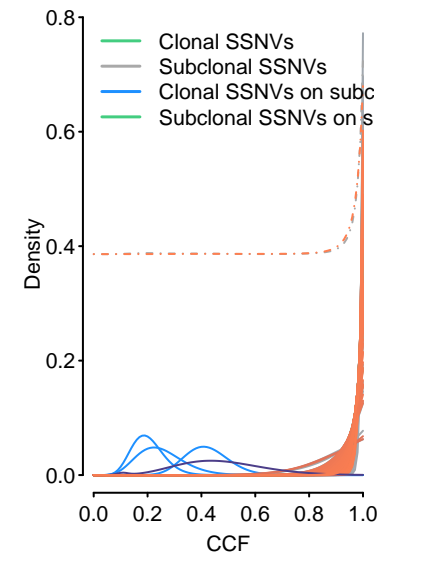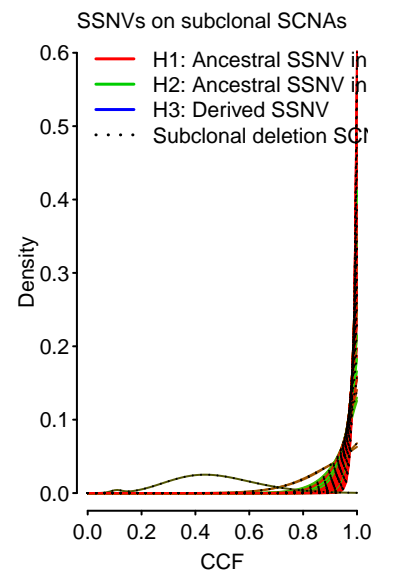

Sample 69

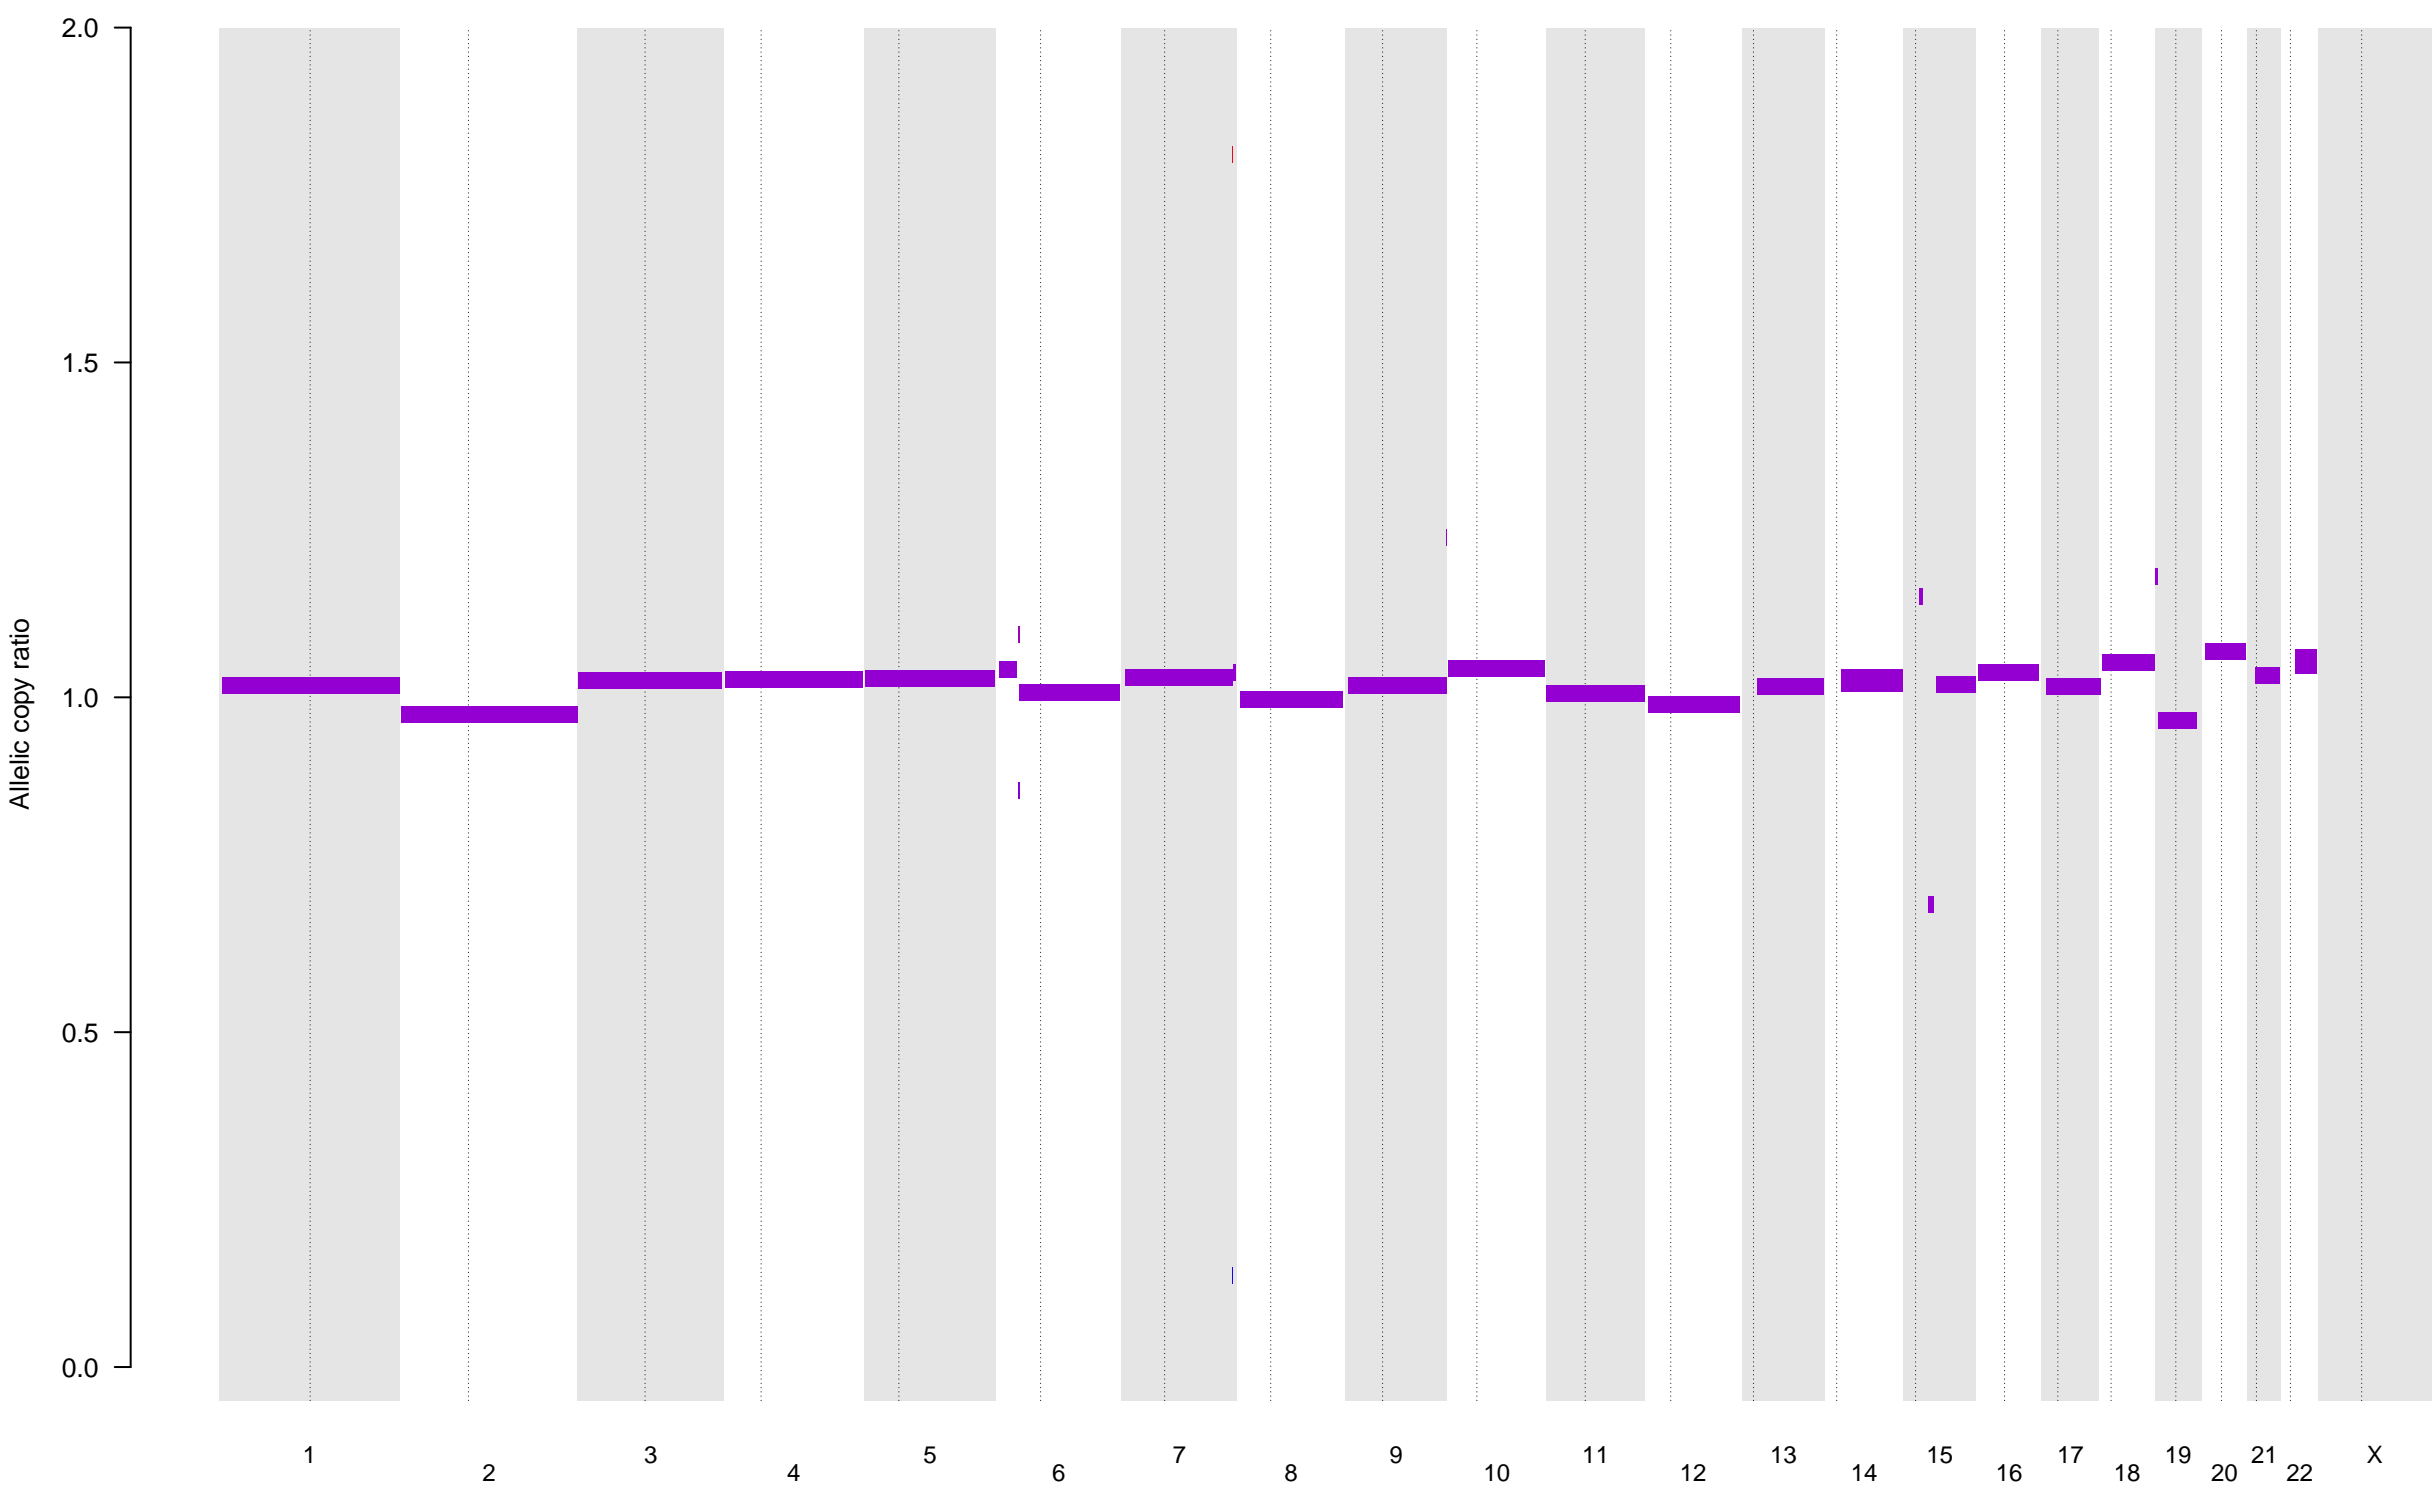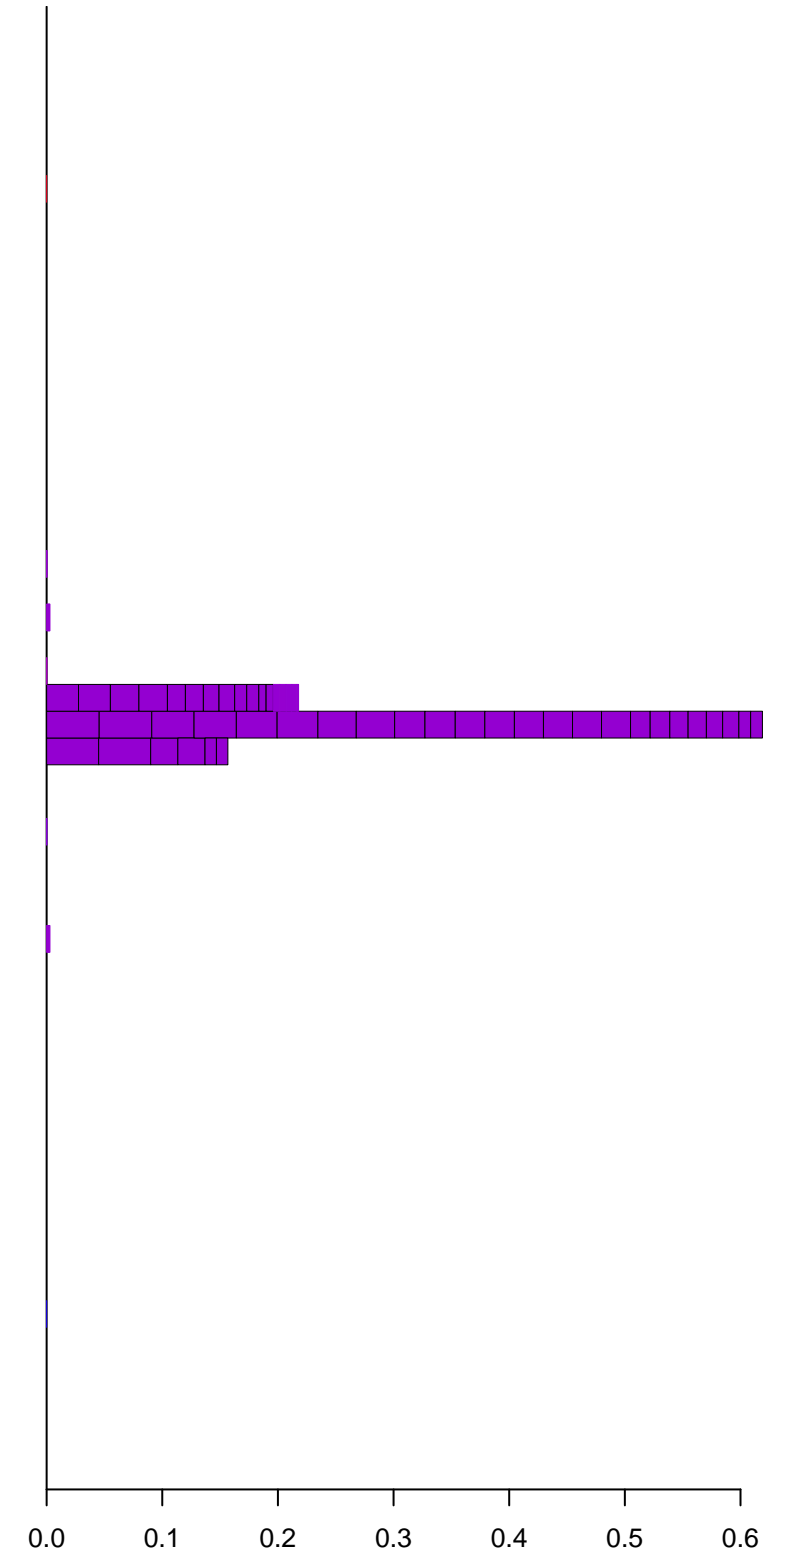



$\text{purity}(\hat{\alpha}) = 0.32$ , ploidy:  $\hat{t} = 1.89$ ,  $\hat{t}_g = 2$   
 $\theta_z = 0.12$ ,  $\theta_{\alpha} = 1.279$ , WGD=0  
 SCNA LL = -185.79, SSNV LL = -8629.73, SCNA Ev = -81.12508

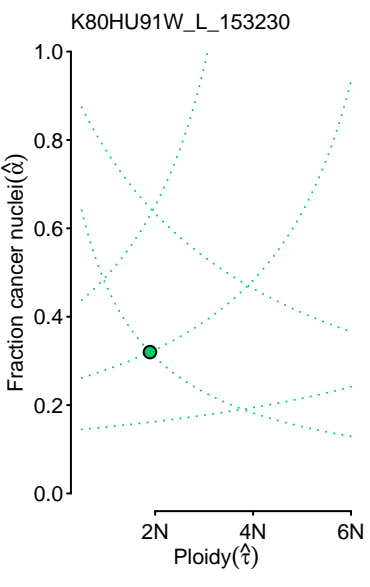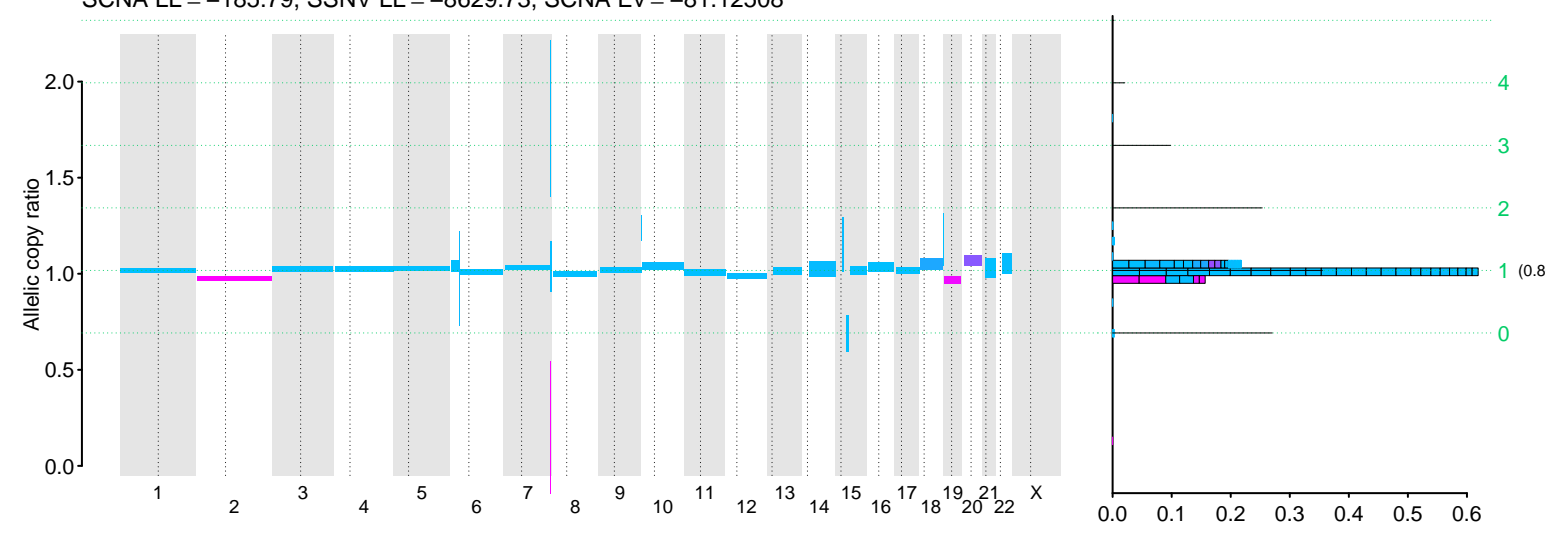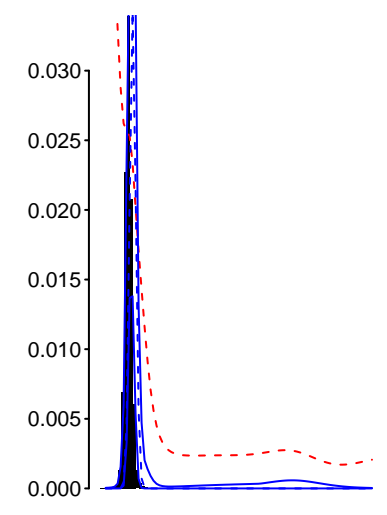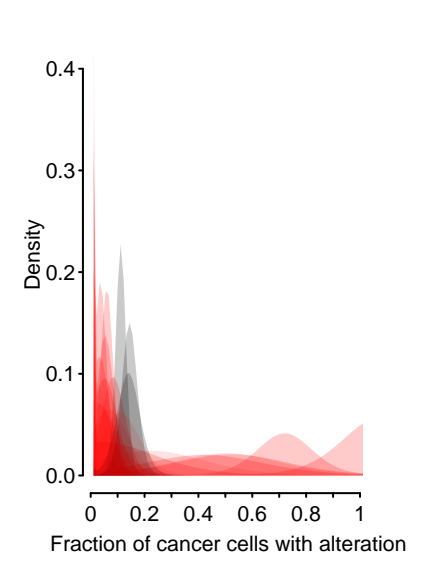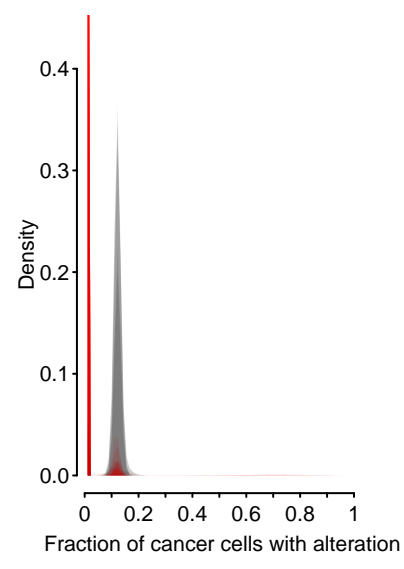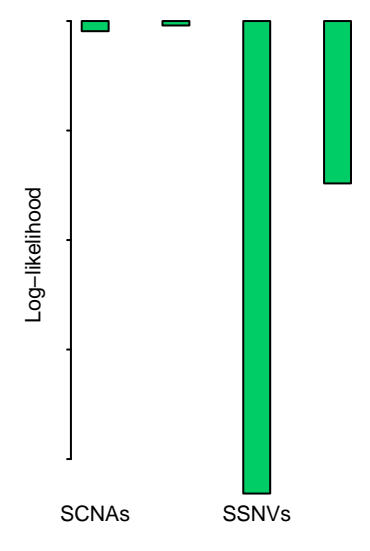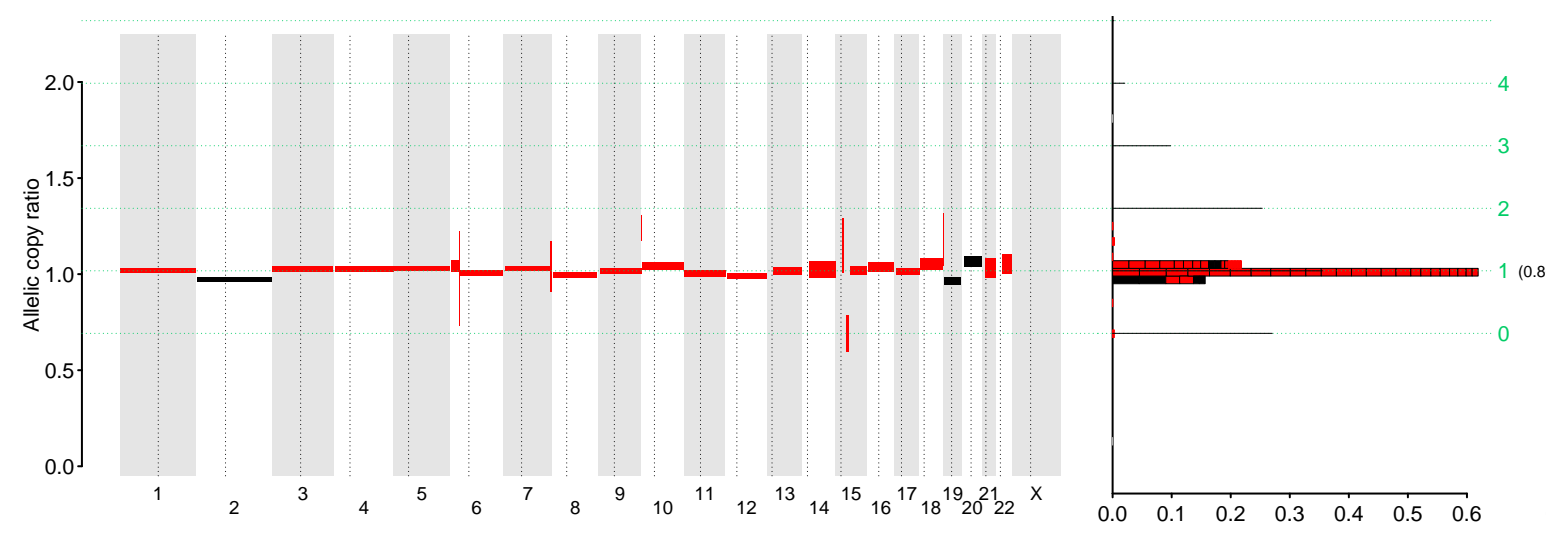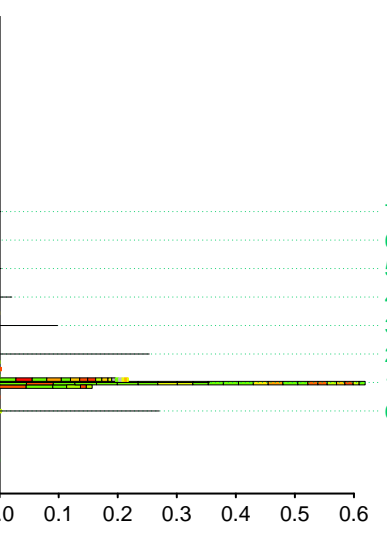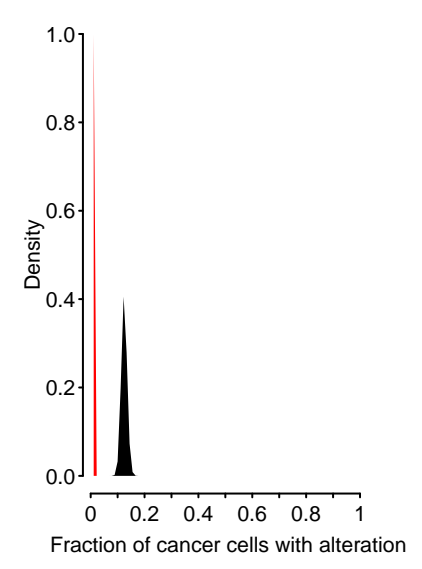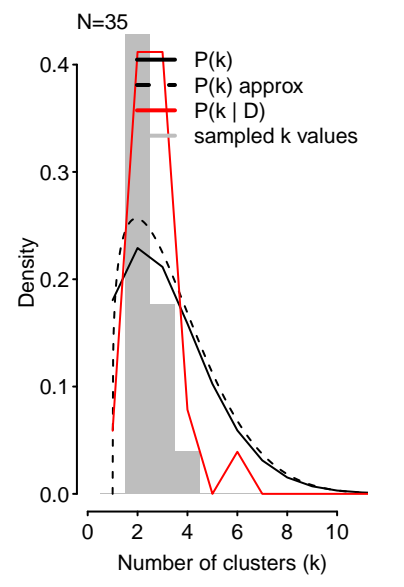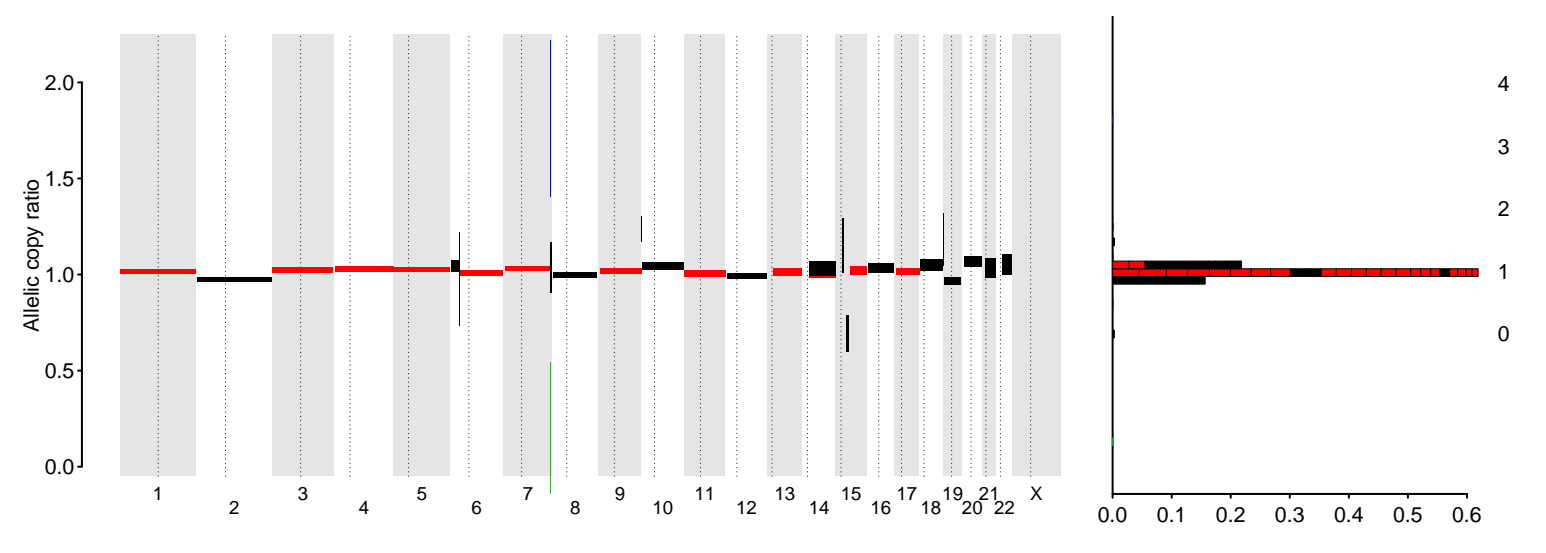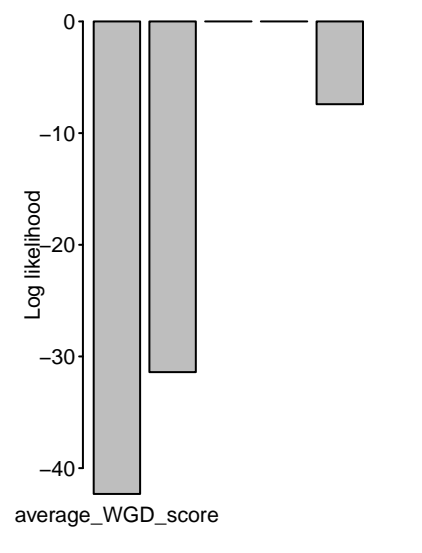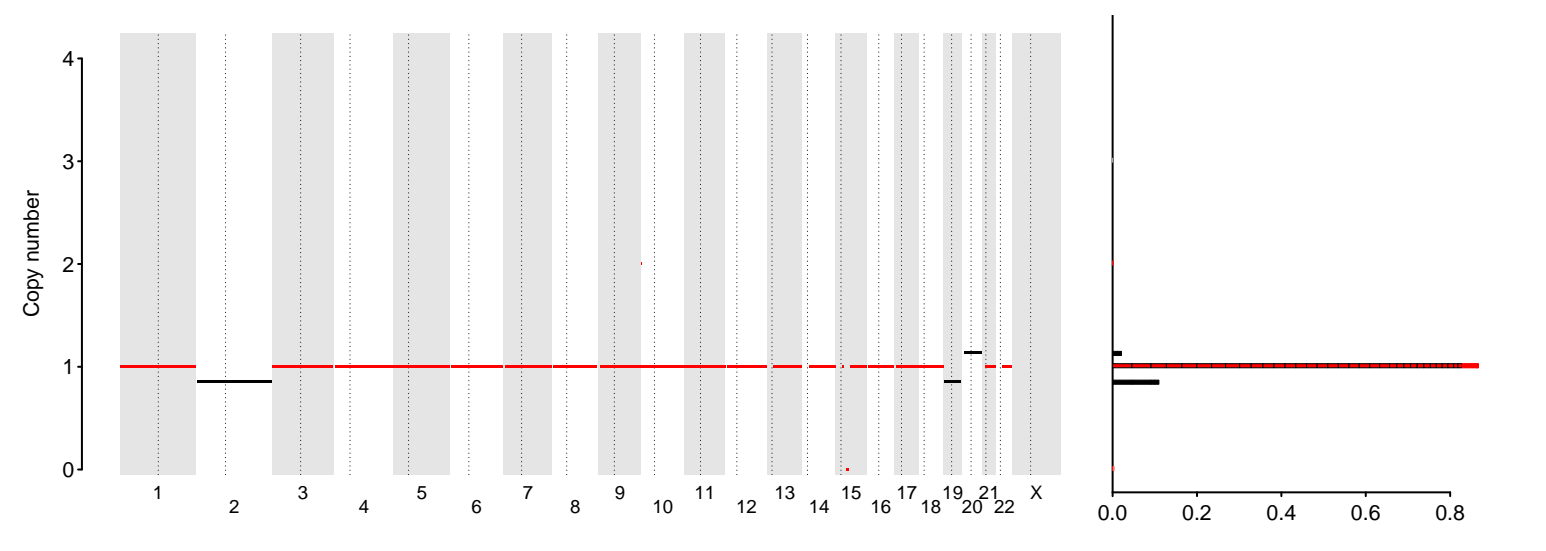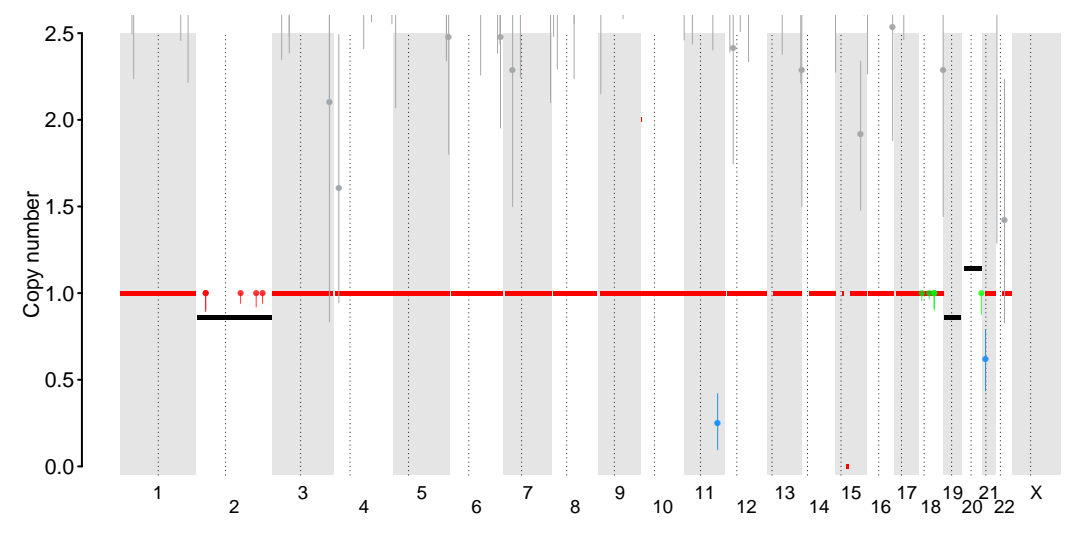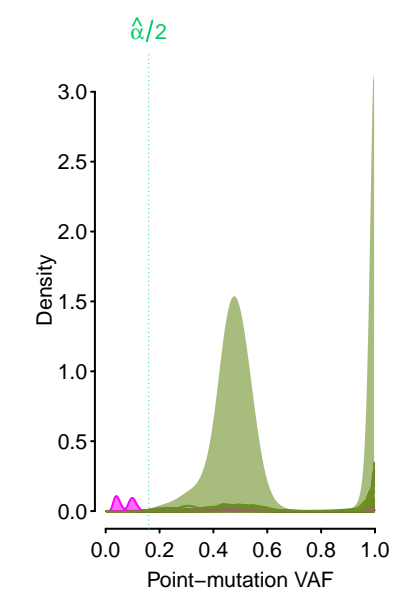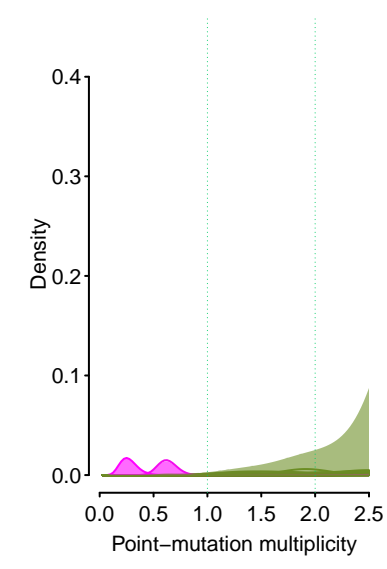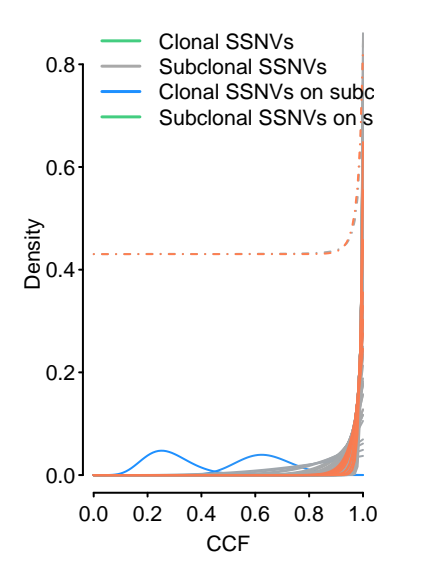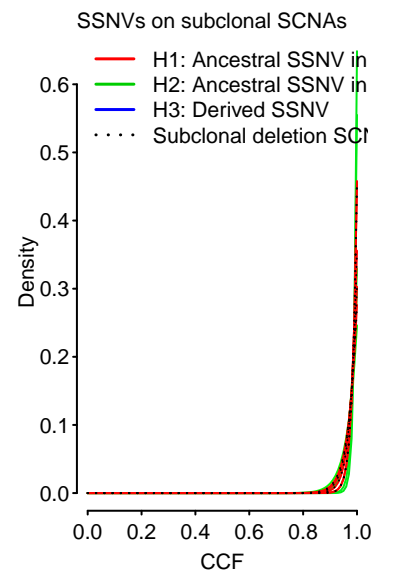



Sample 71

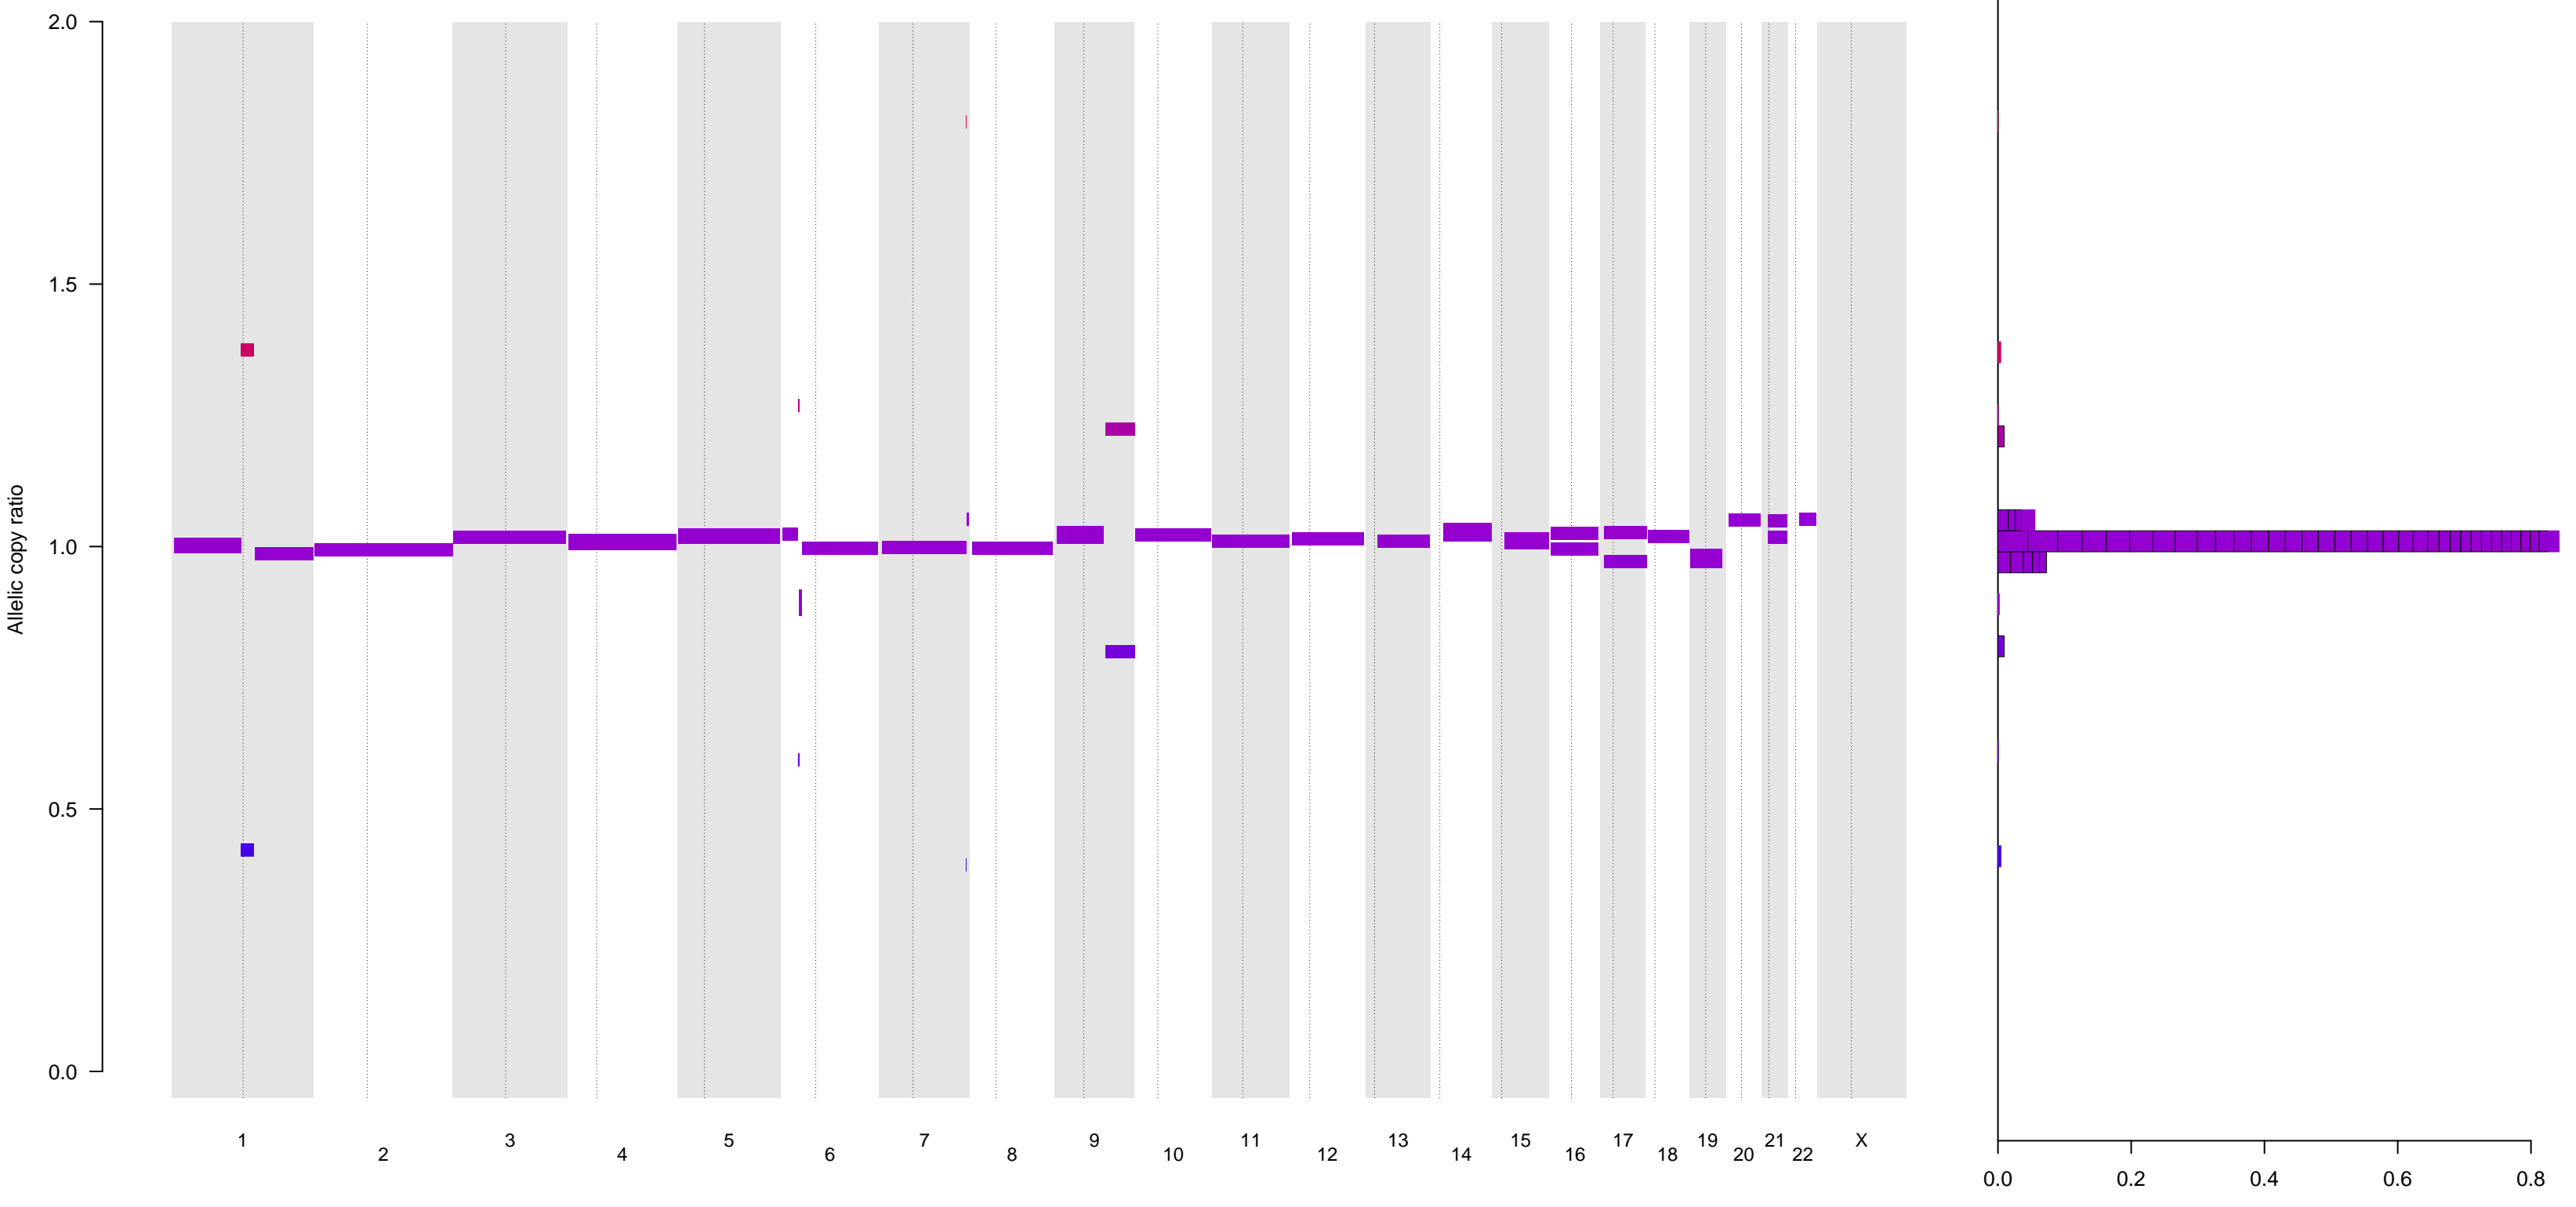

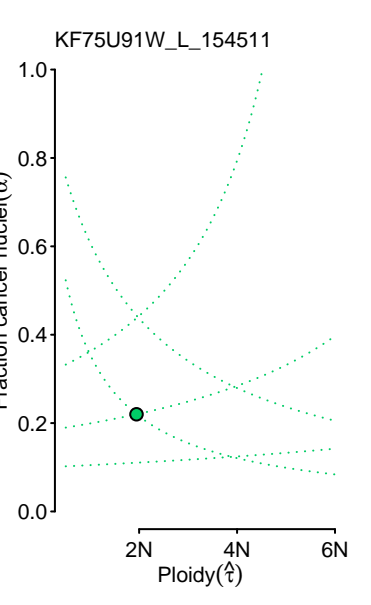

purity( $\hat{\delta}_x$ ) = 0.22, ploidy:  $\hat{\delta} = 1.95$ ,  $\hat{\delta}_g = 2.01$   
 $\theta_z = 0$ ,  $\theta_0 = 1.403$ , WGD=0  
 SCNA LL = -183.3, SSNV LL = -5764.76, SCNA Ev = -33.49066

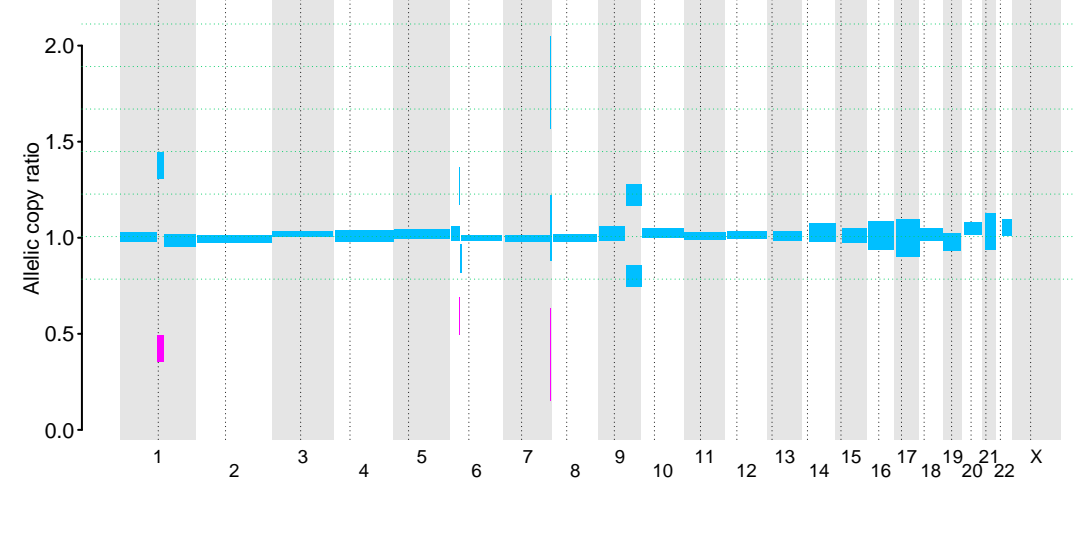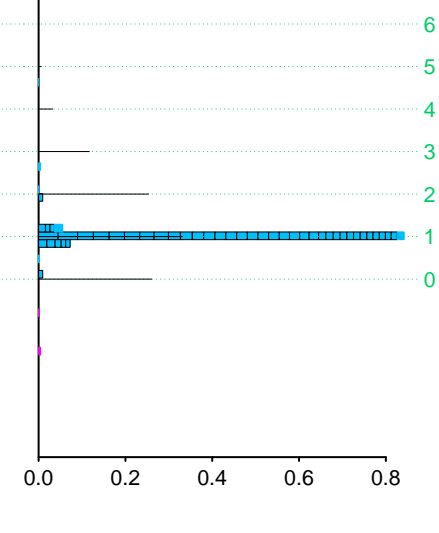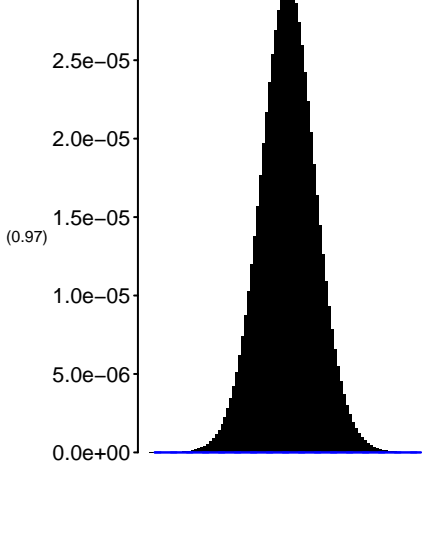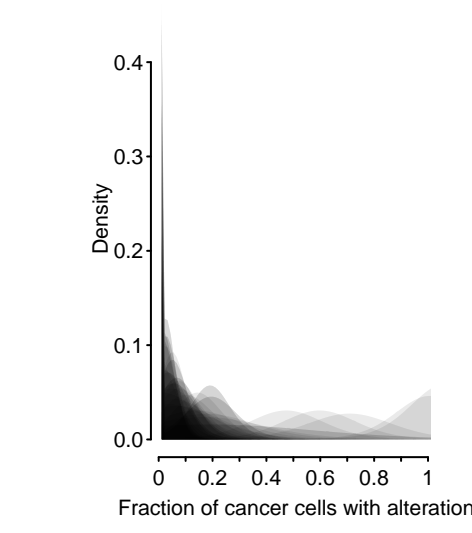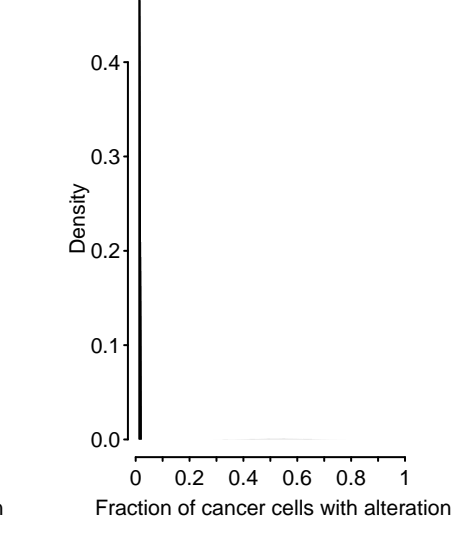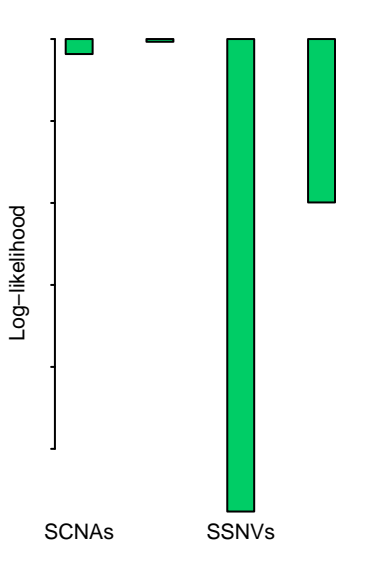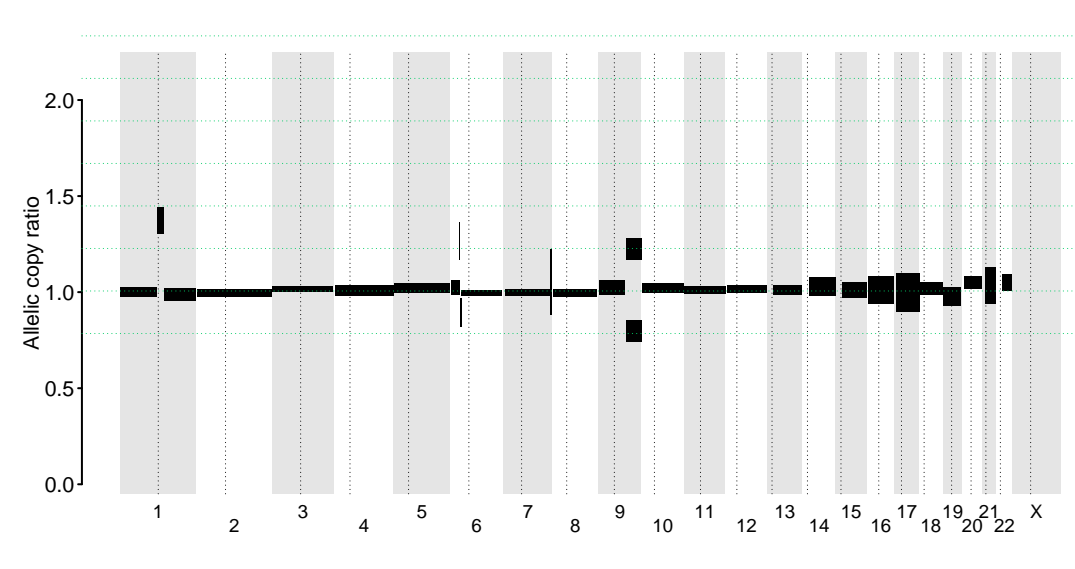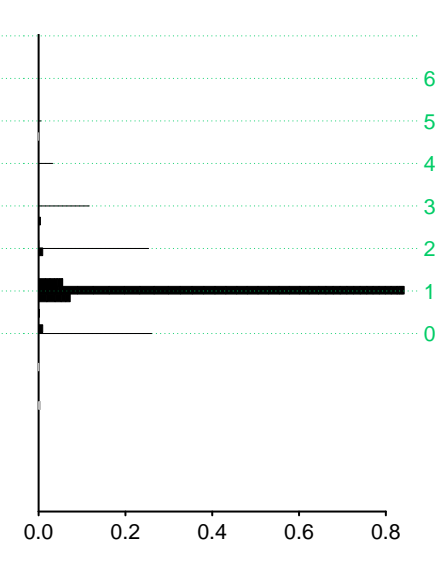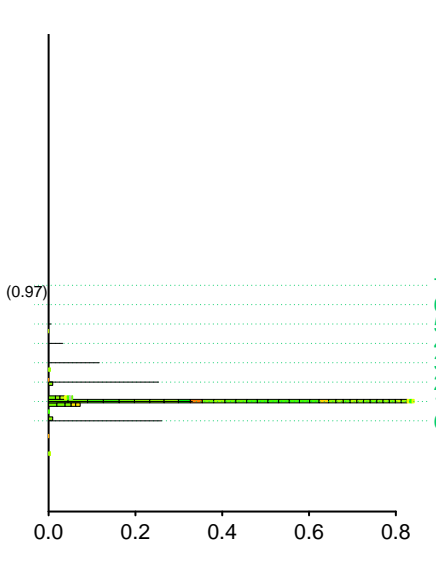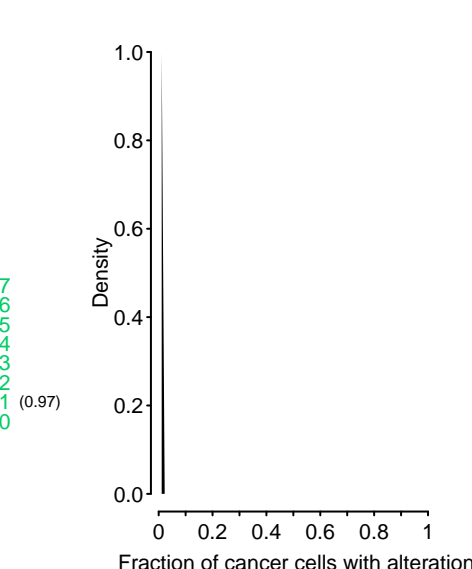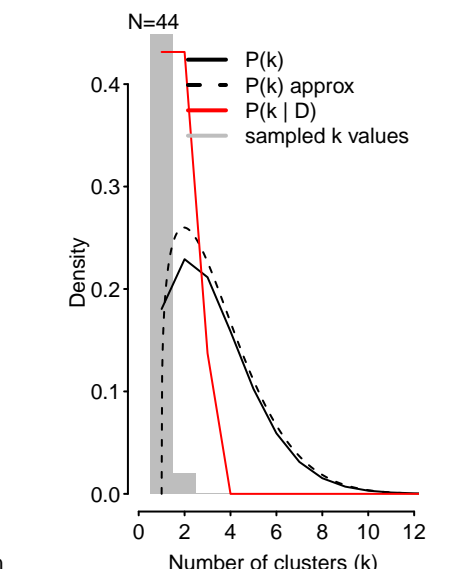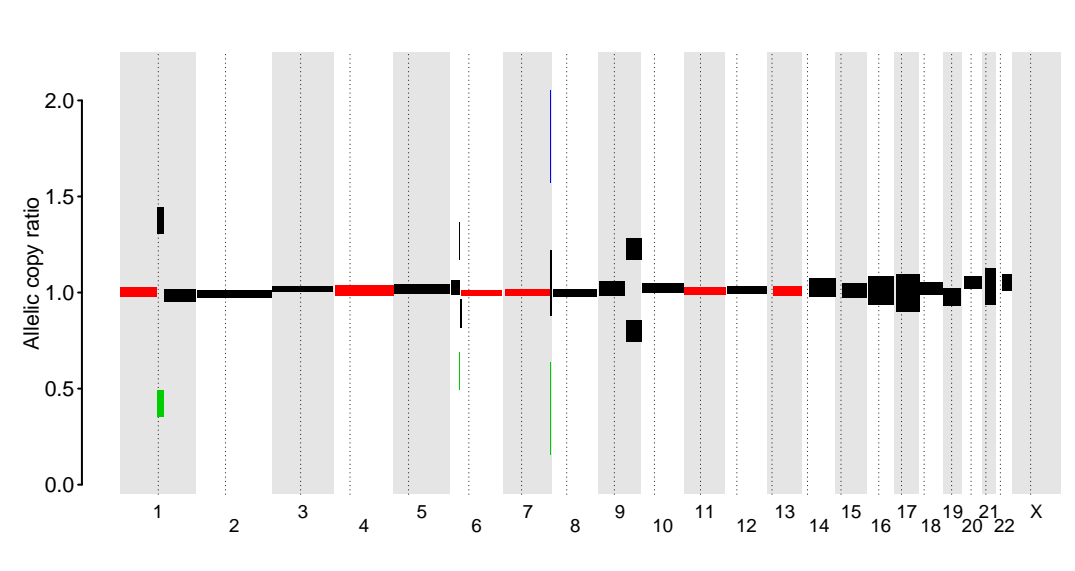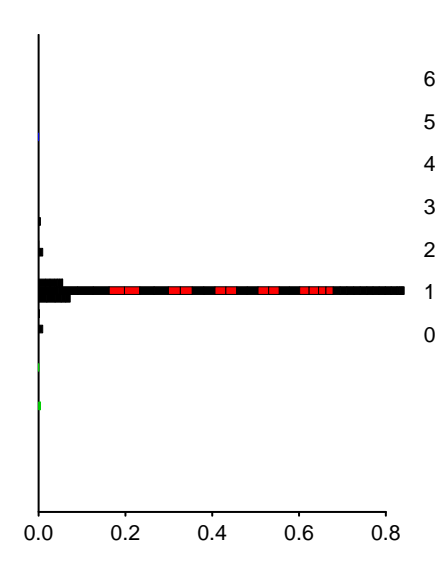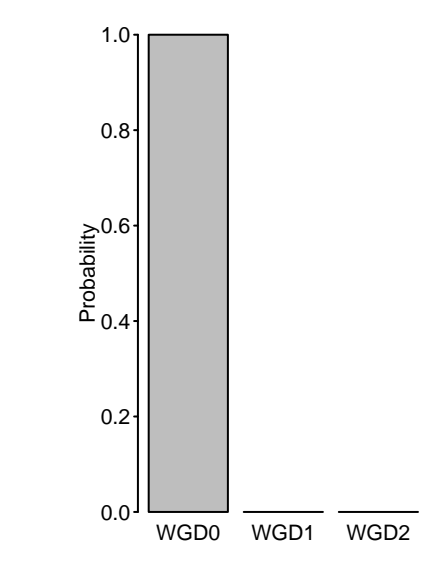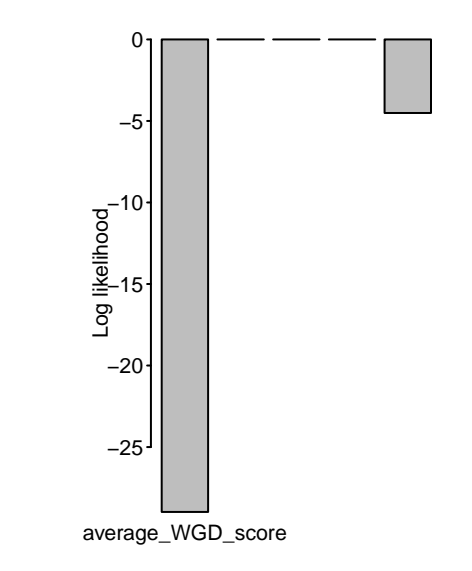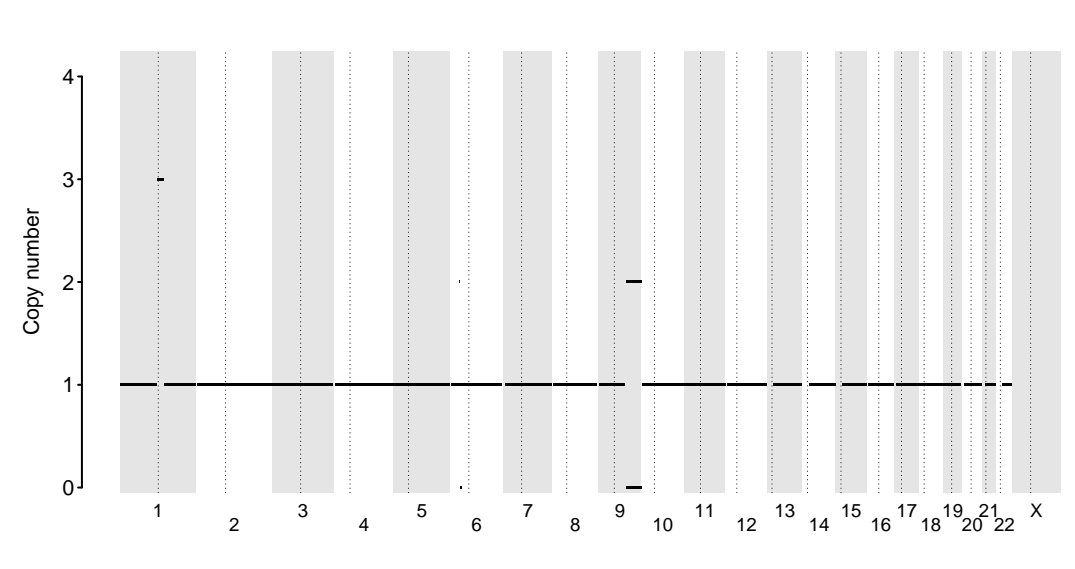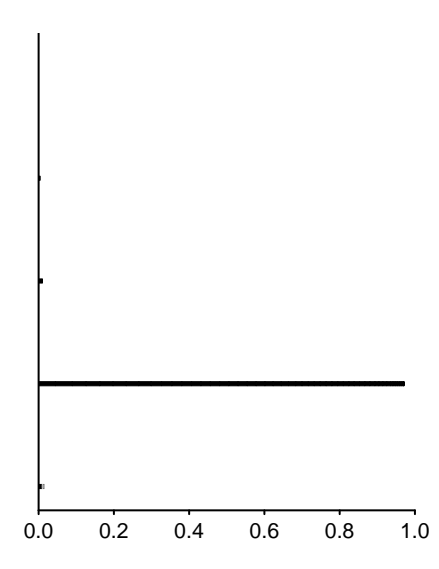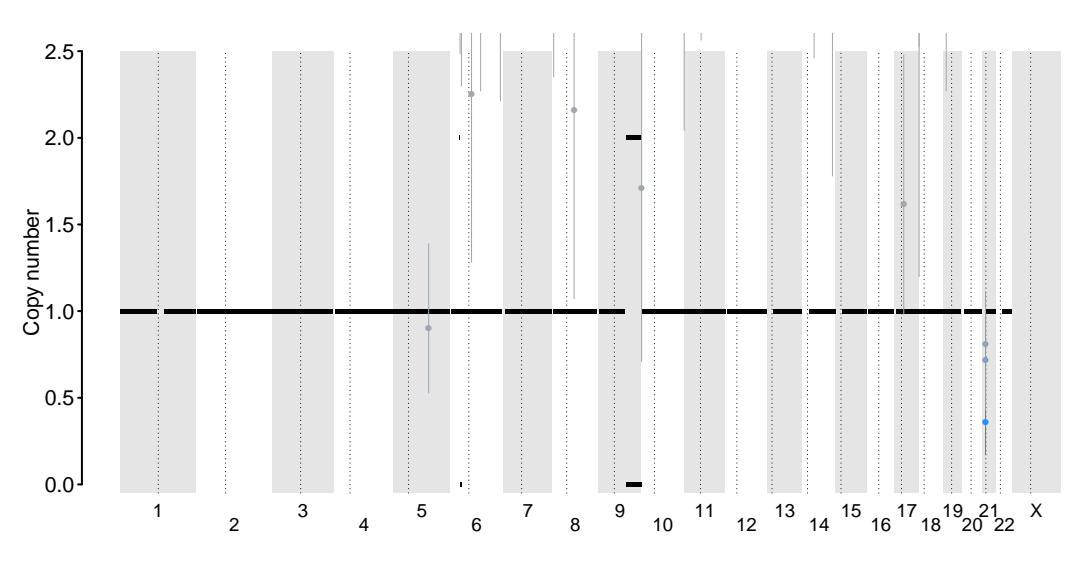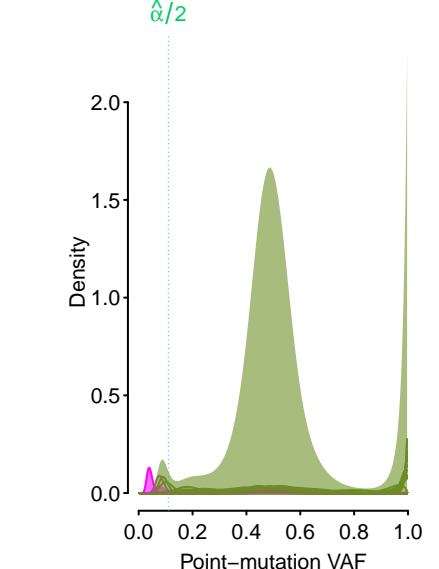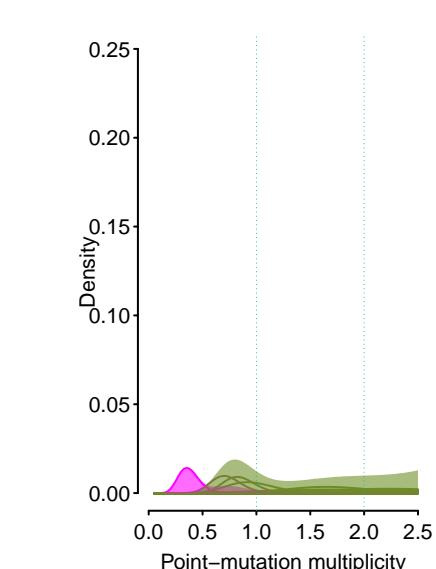

Sample 72

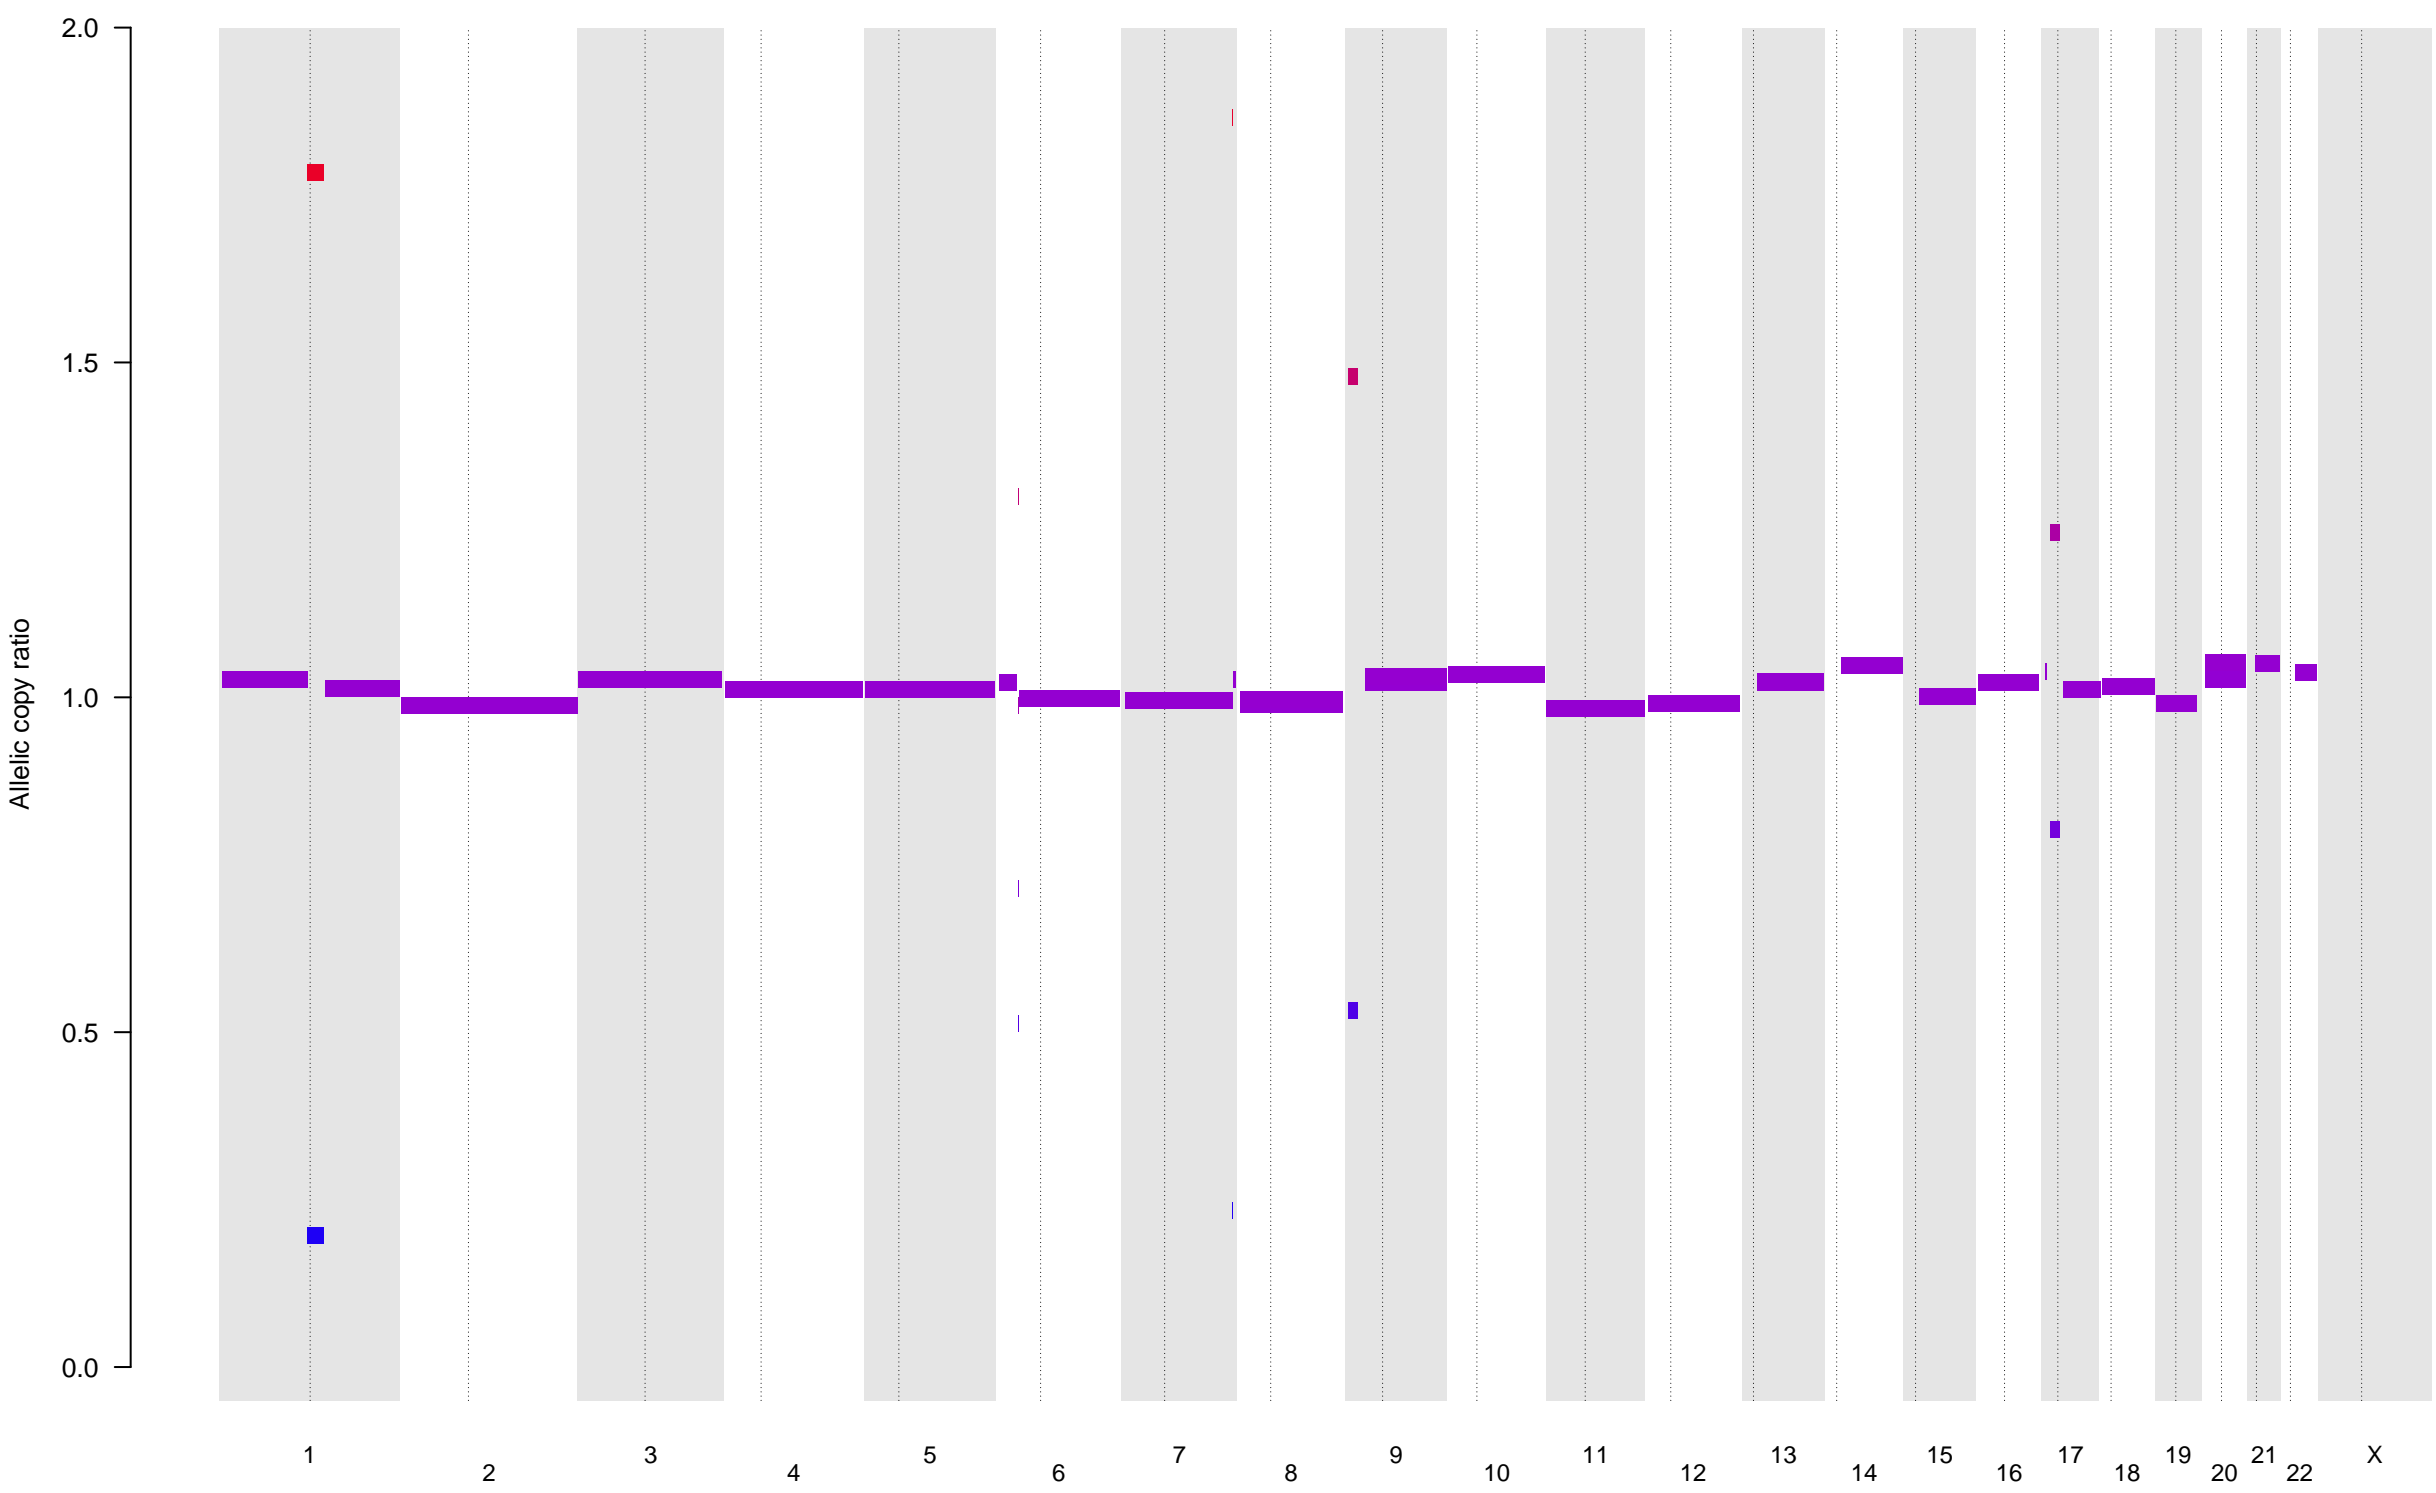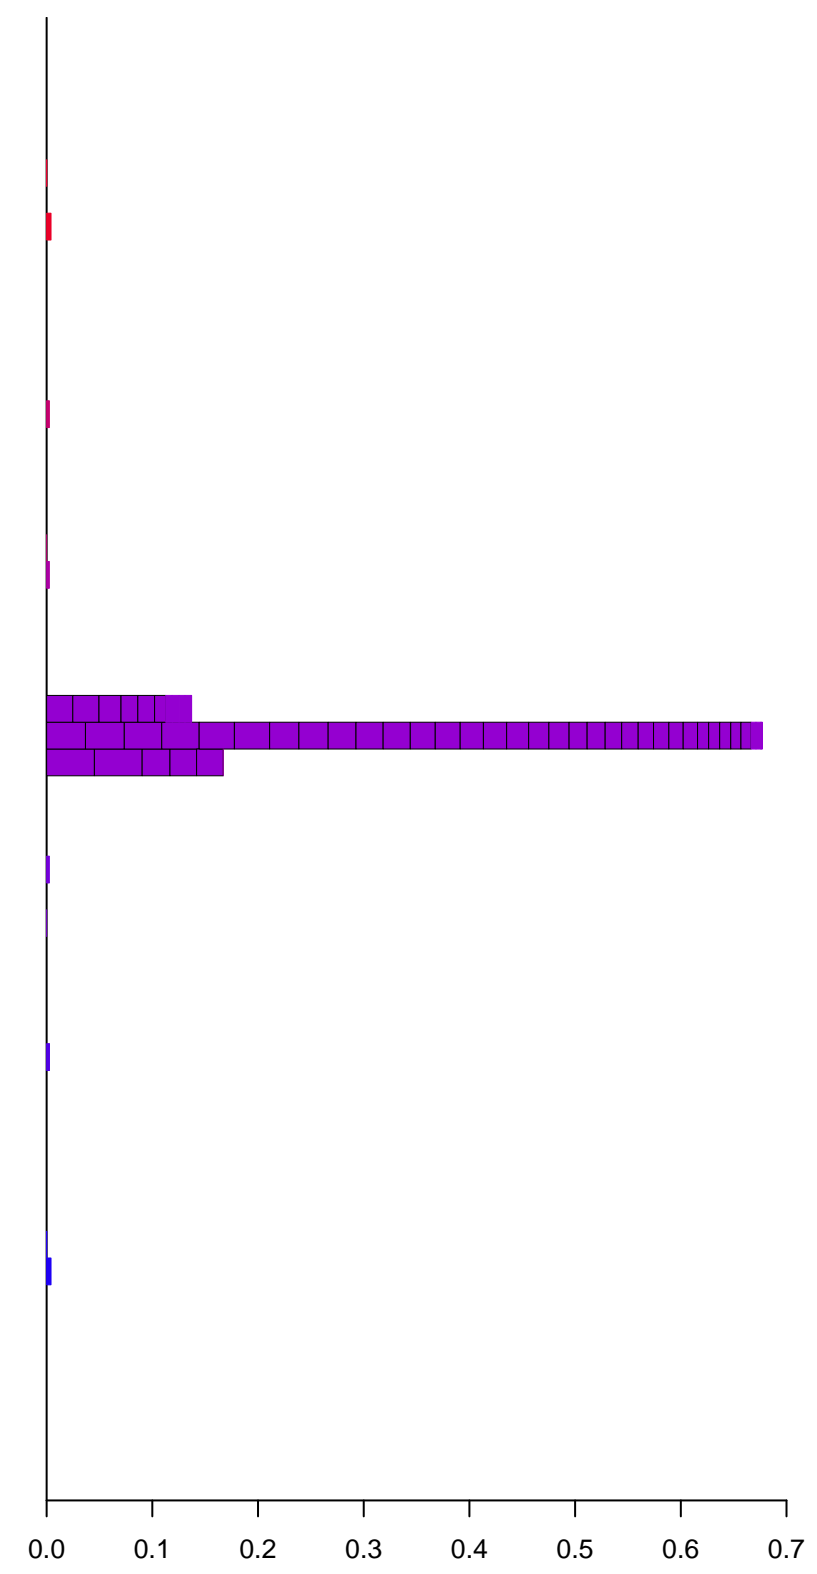

$\text{purity}(\hat{\alpha}) = 0.47$ , ploidy:  $\hat{t} = 1.96$ ,  $\hat{t}_g = 2.01$   
 $\theta_z = 0$ ,  $\theta_0 = 1.235$ , WGD=0  
 SCNA LL = -147.39, SSNV LL = -5504.63, SCNA Ev = -29.60161

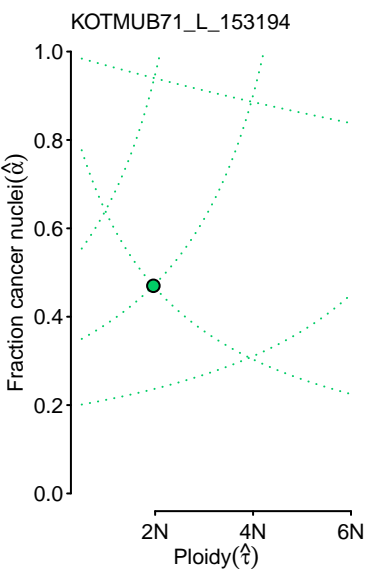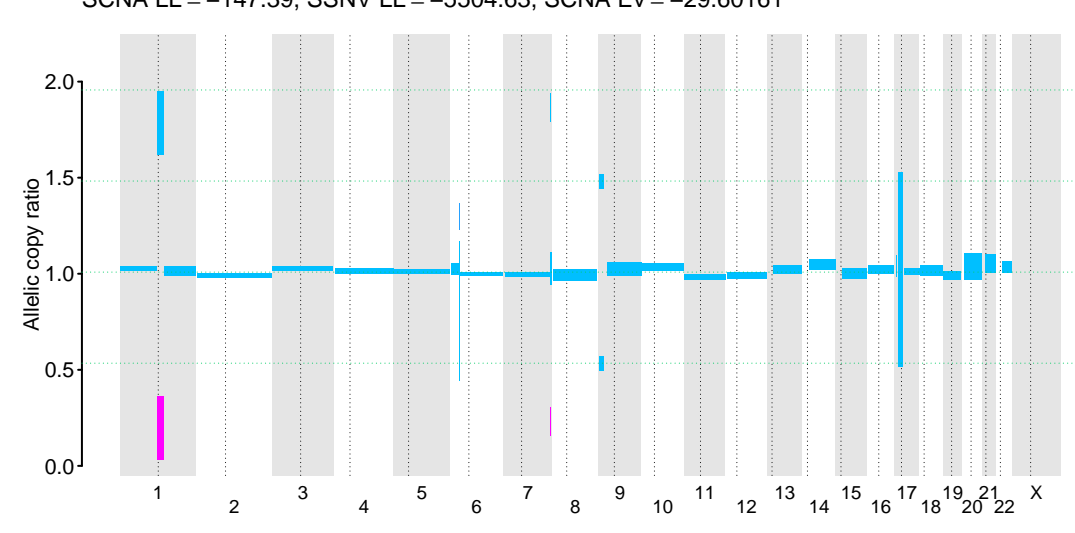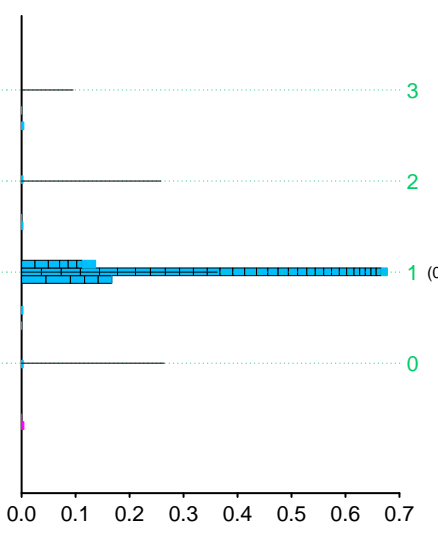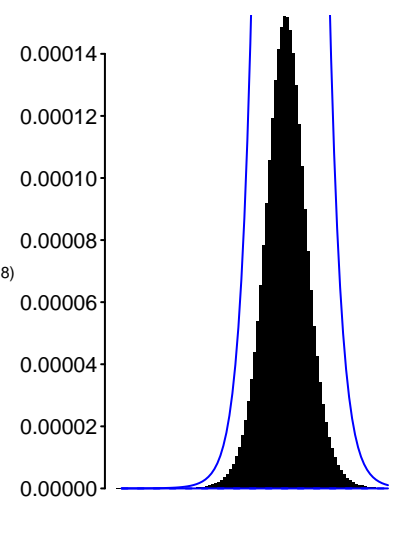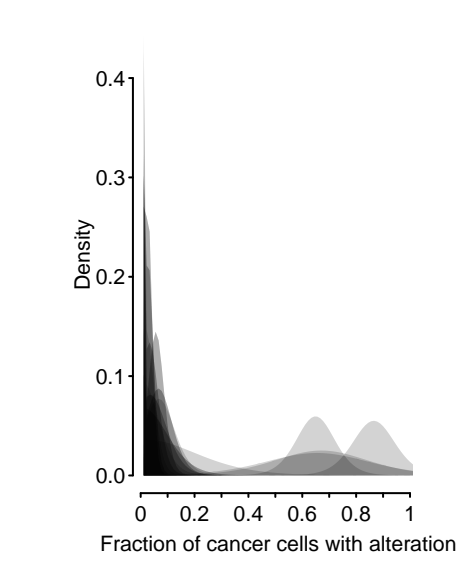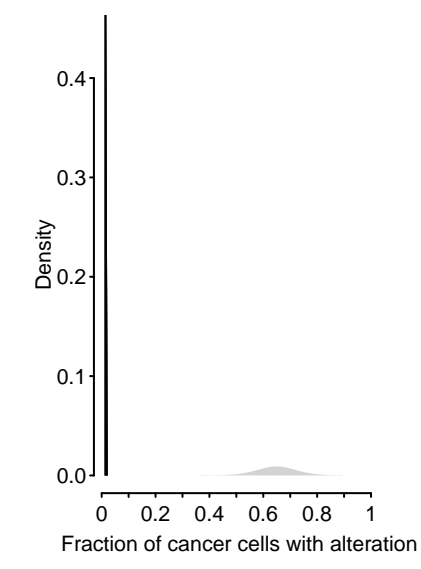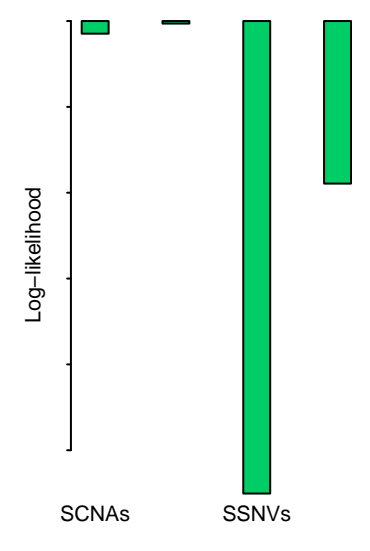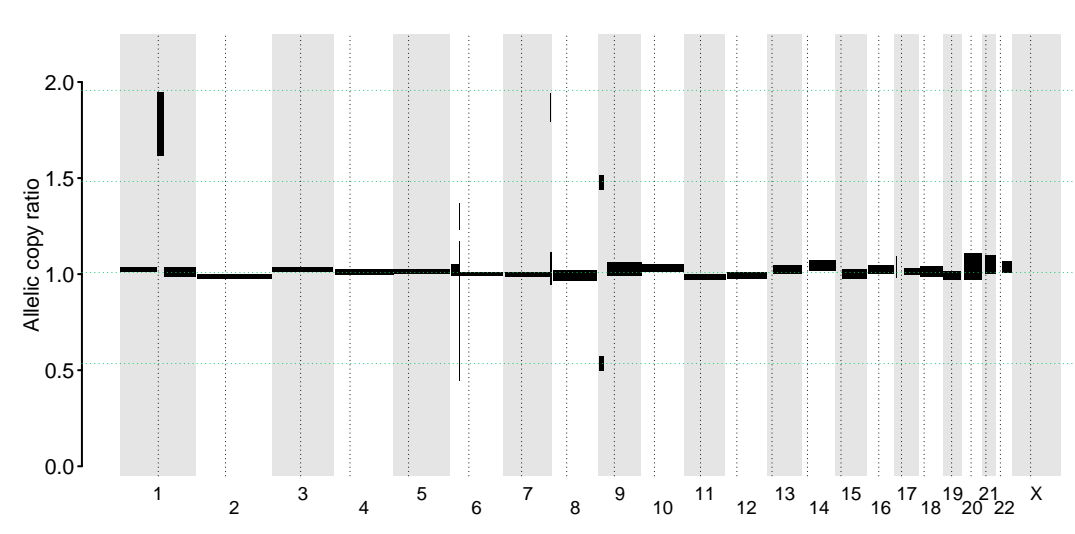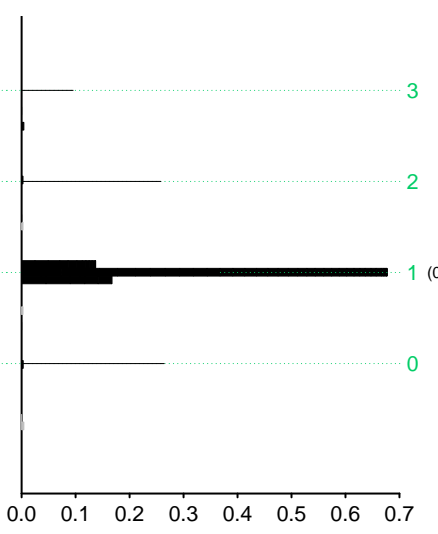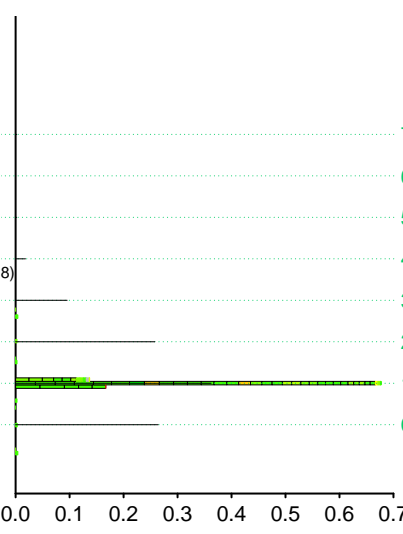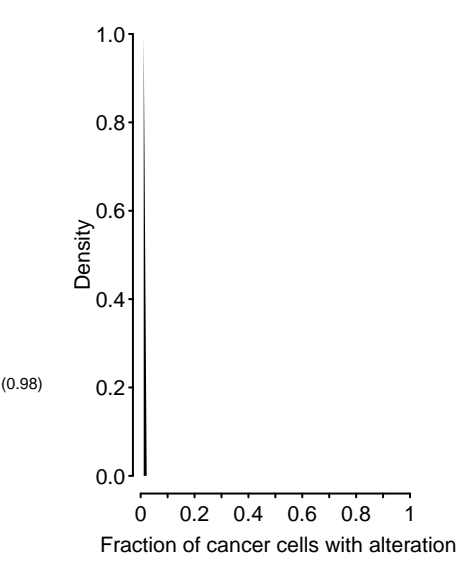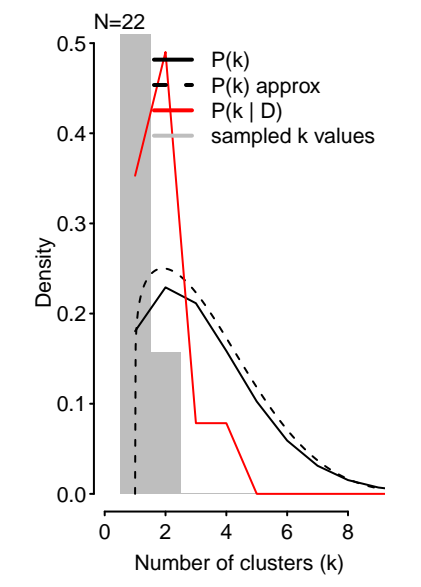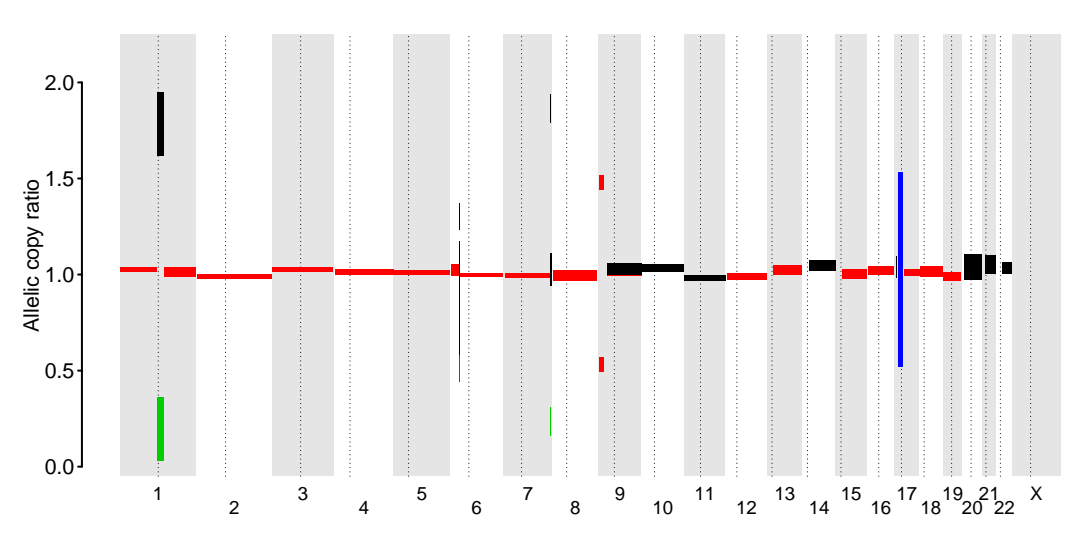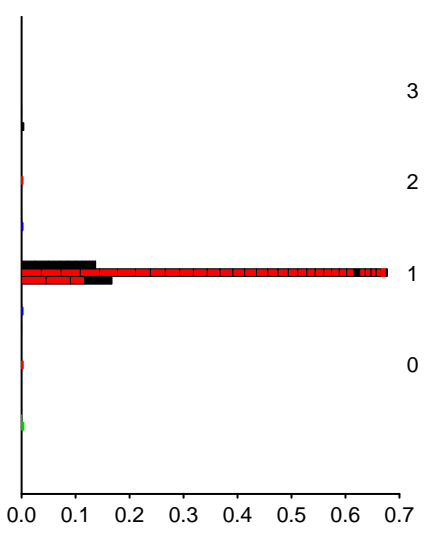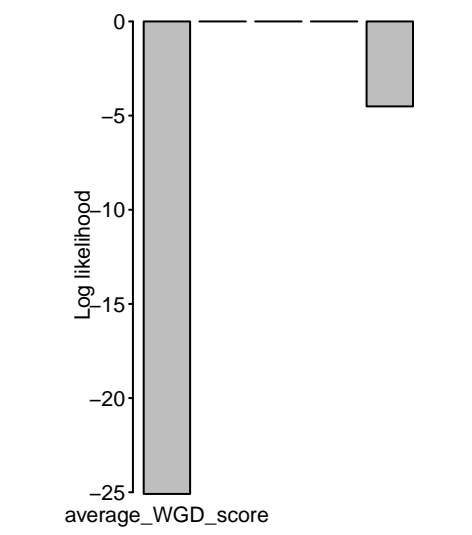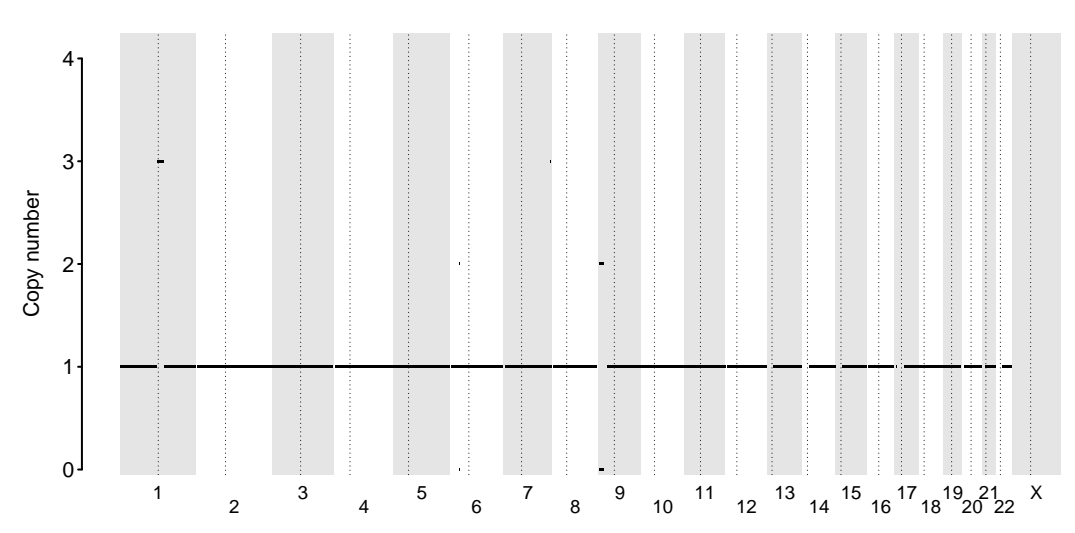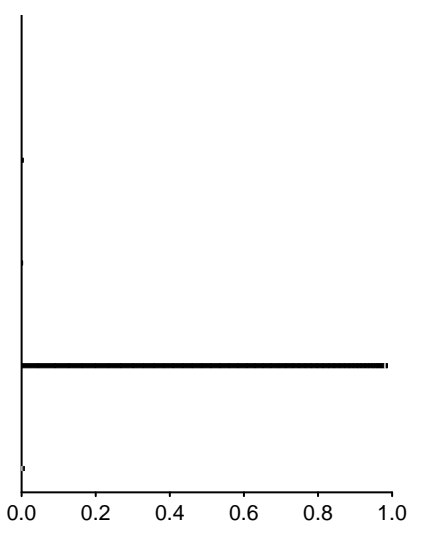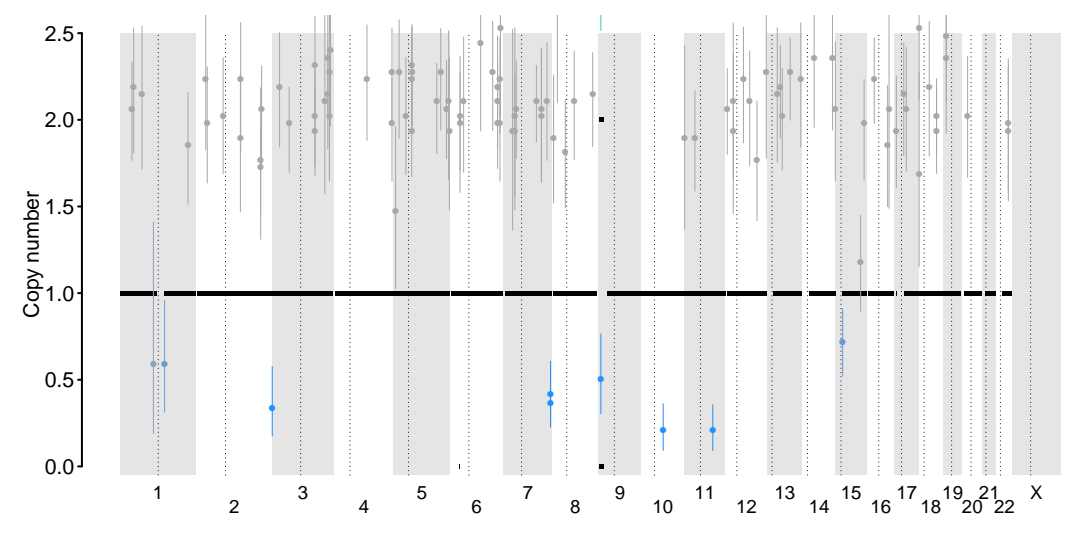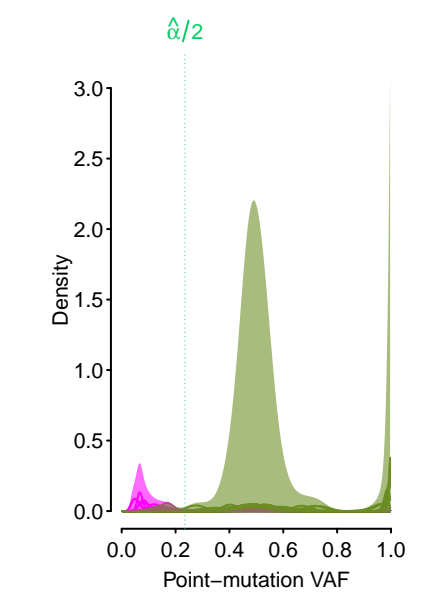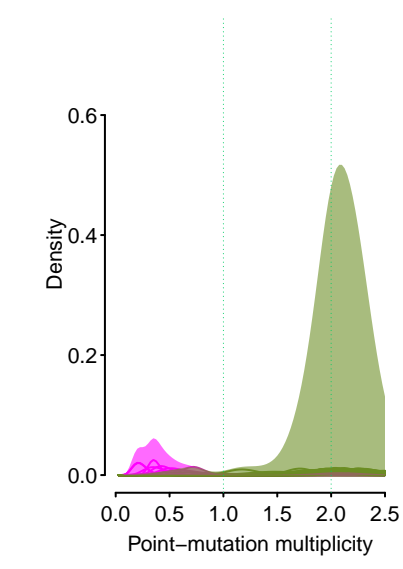

Sample 73

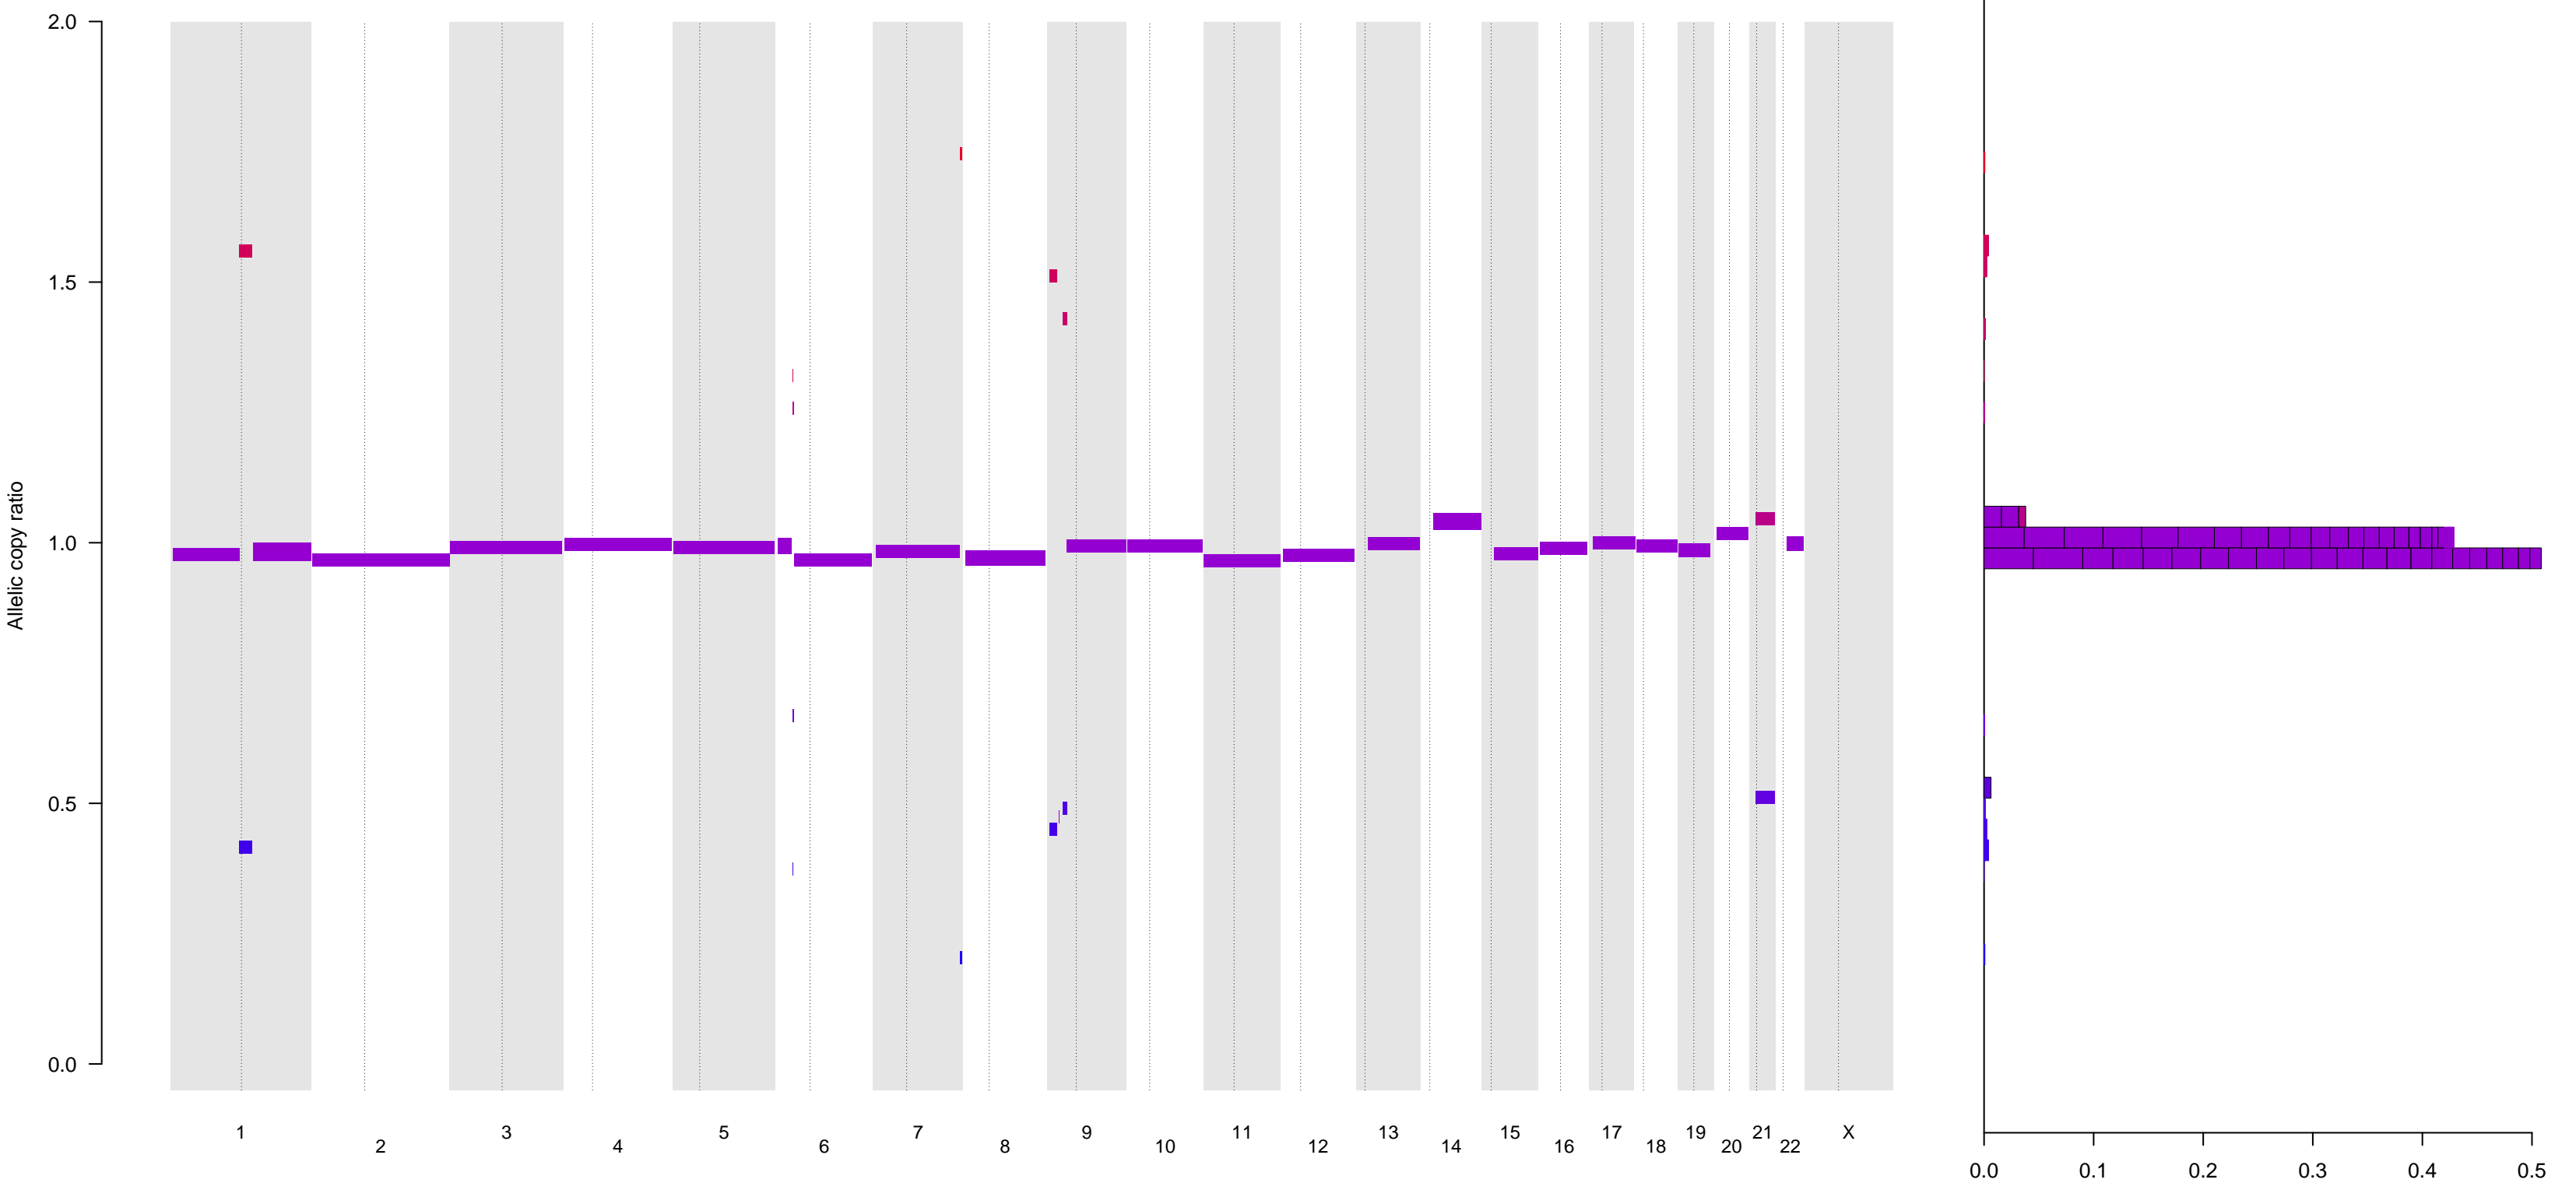

$\text{purity}(\hat{\lambda}) = 0.51$ , ploidy:  $\hat{t} = 2.07$ ,  $\hat{t}_g = 1.99$   
 $\theta_z = 0$ ,  $\theta_0 = 1.244$ , WGD=0  
 SCNA LL = -136.75, SSNV LL = -5408.17, SCNA Ev = -37.14933

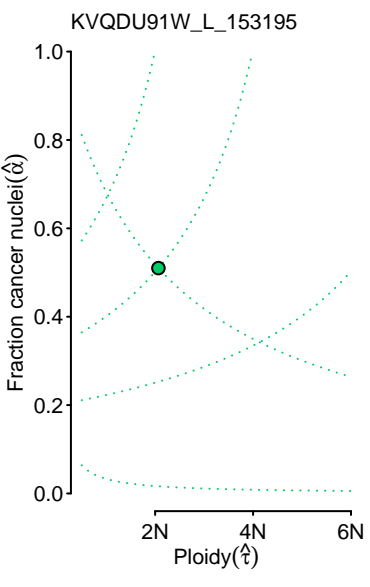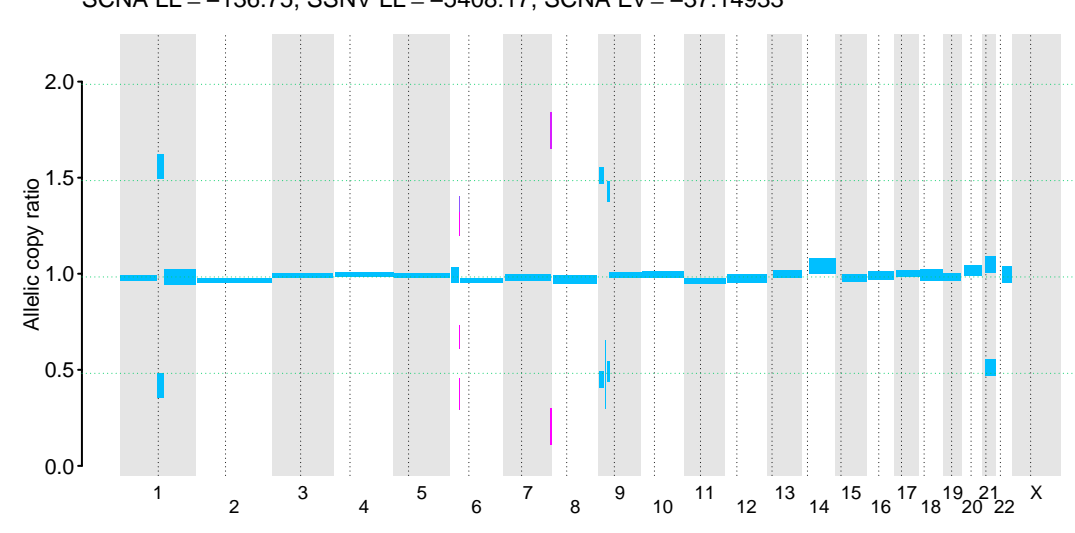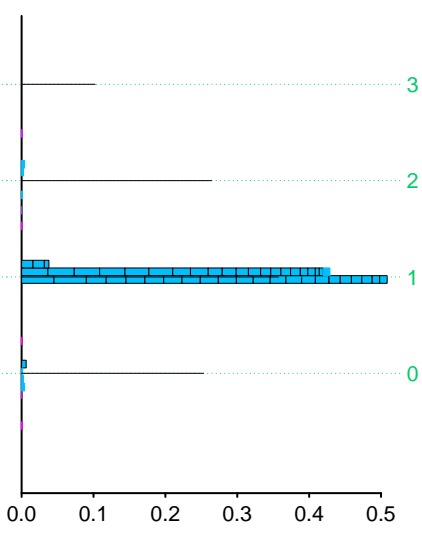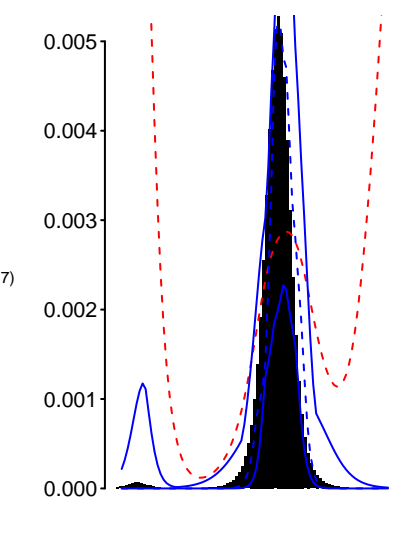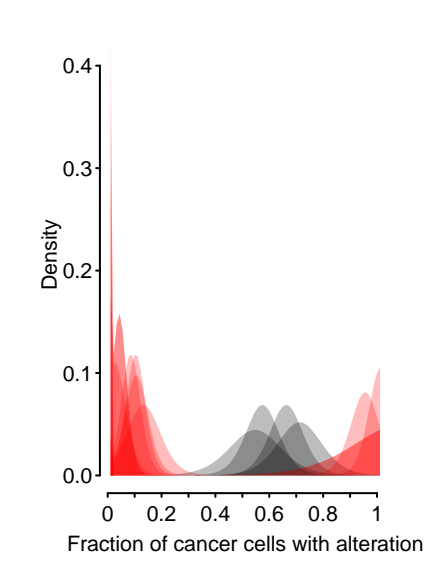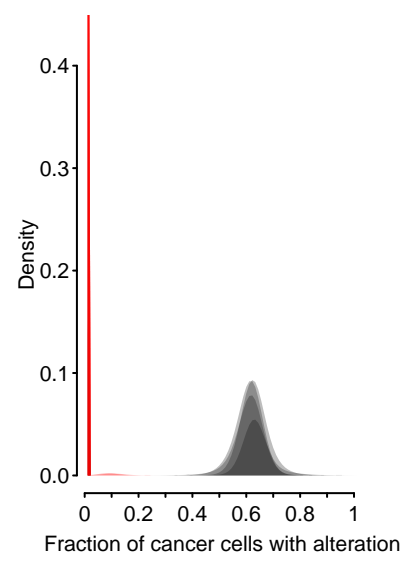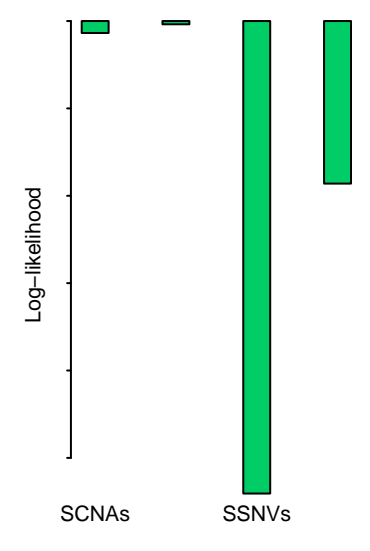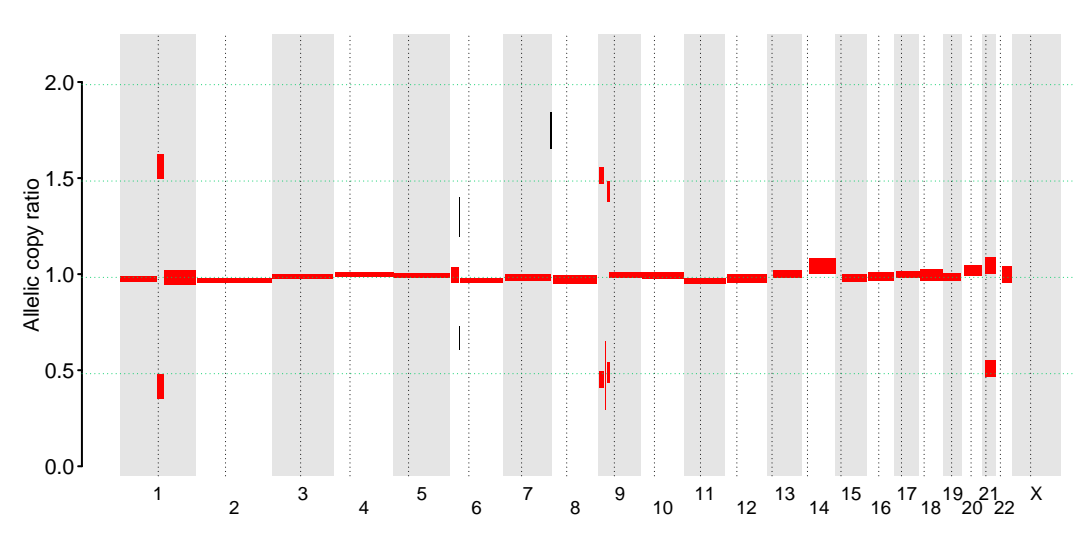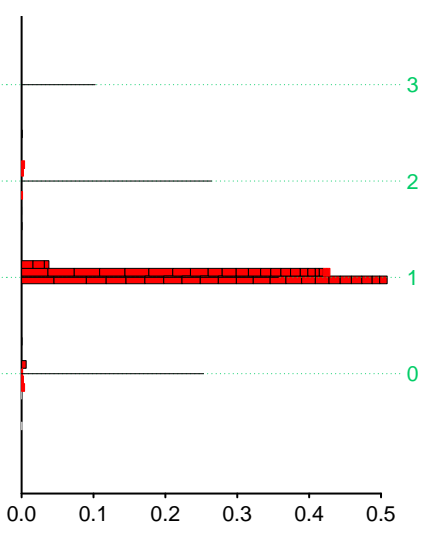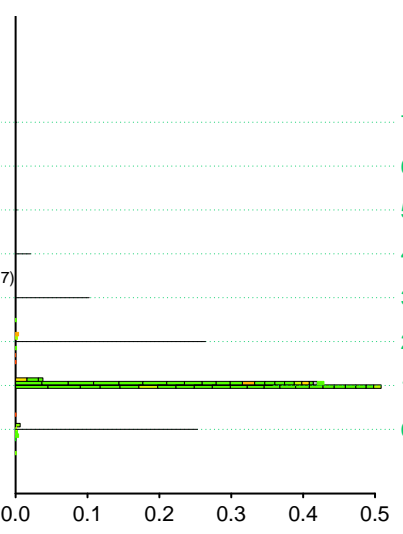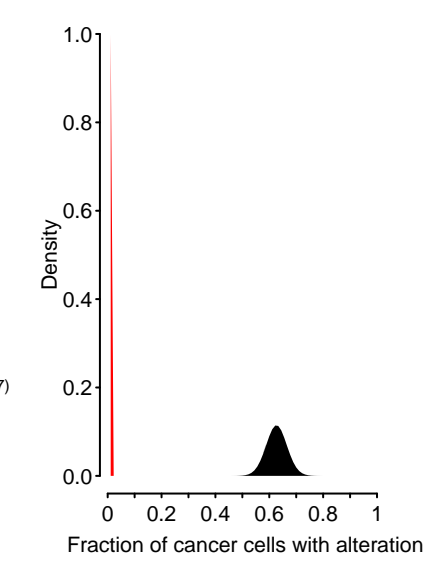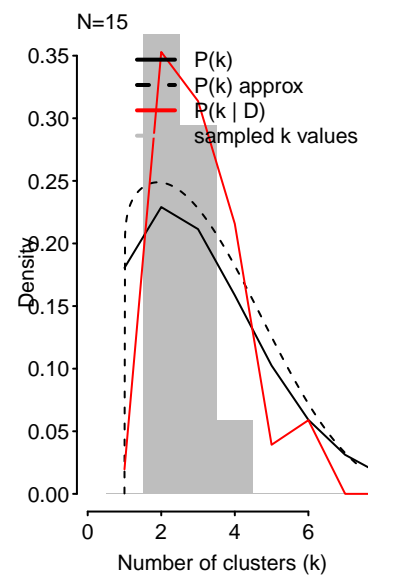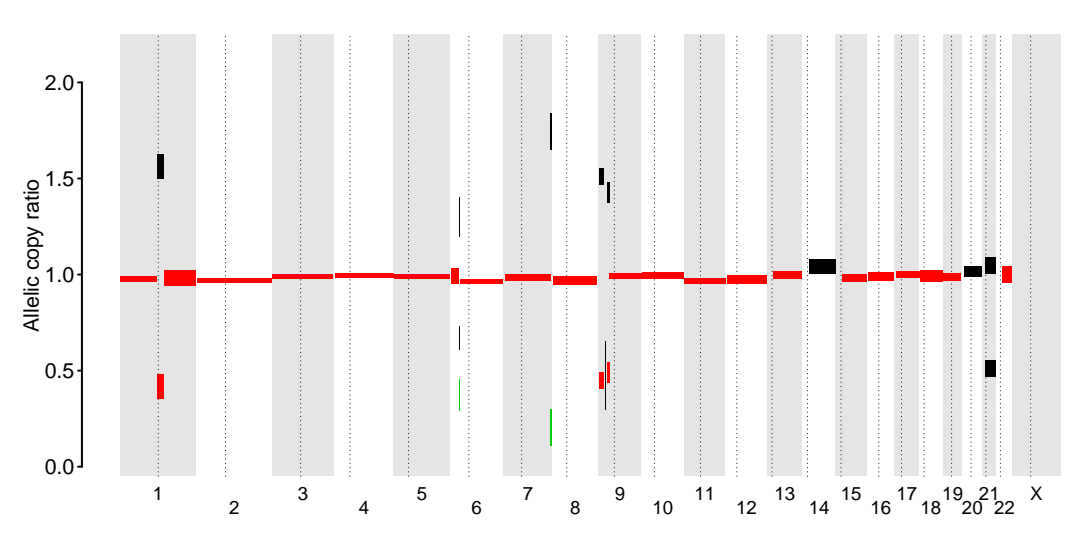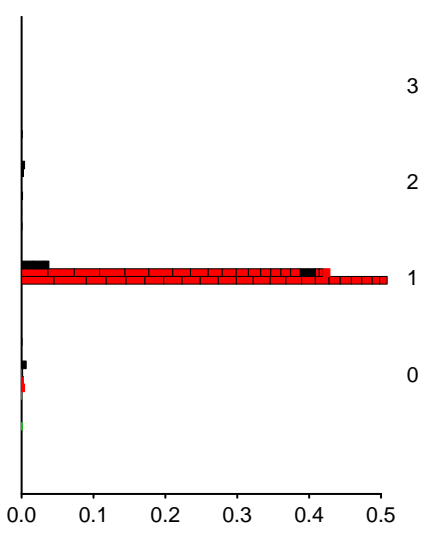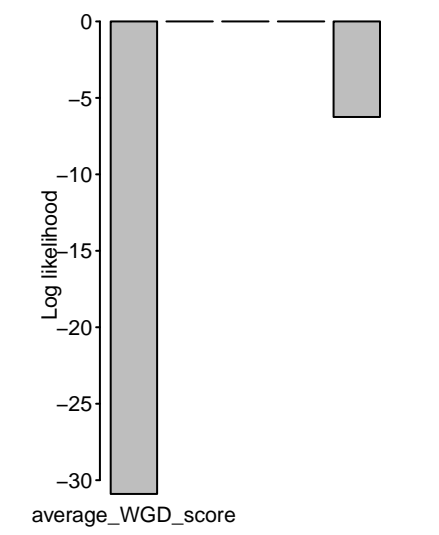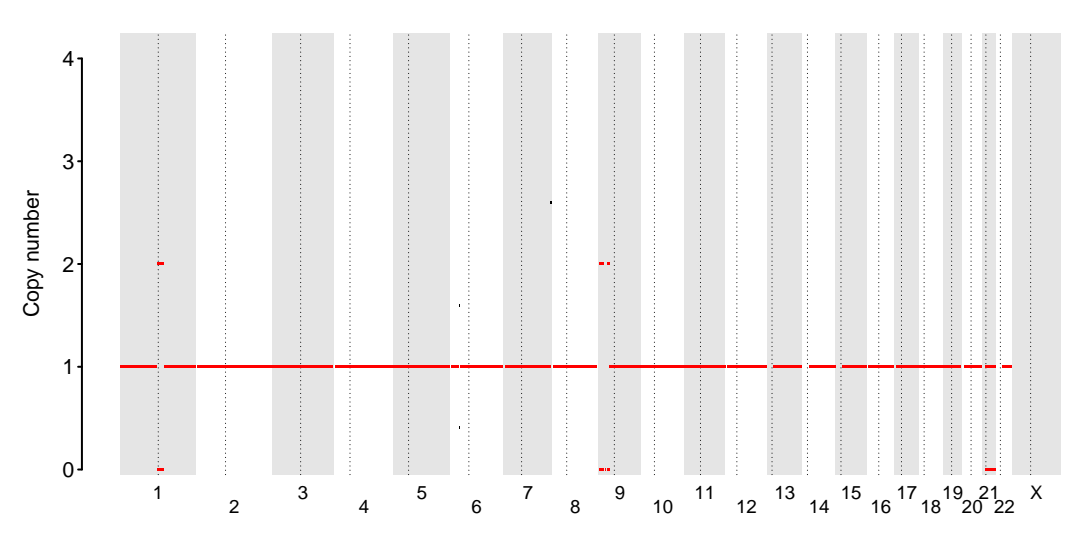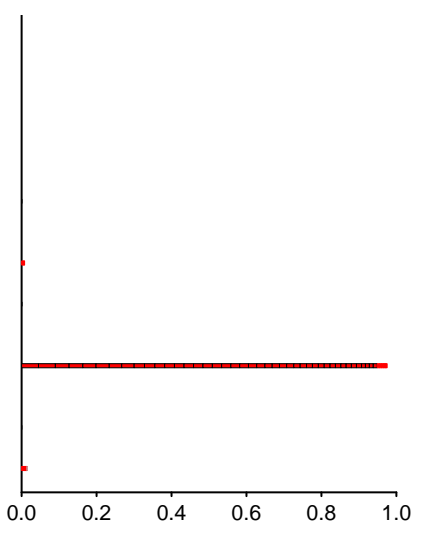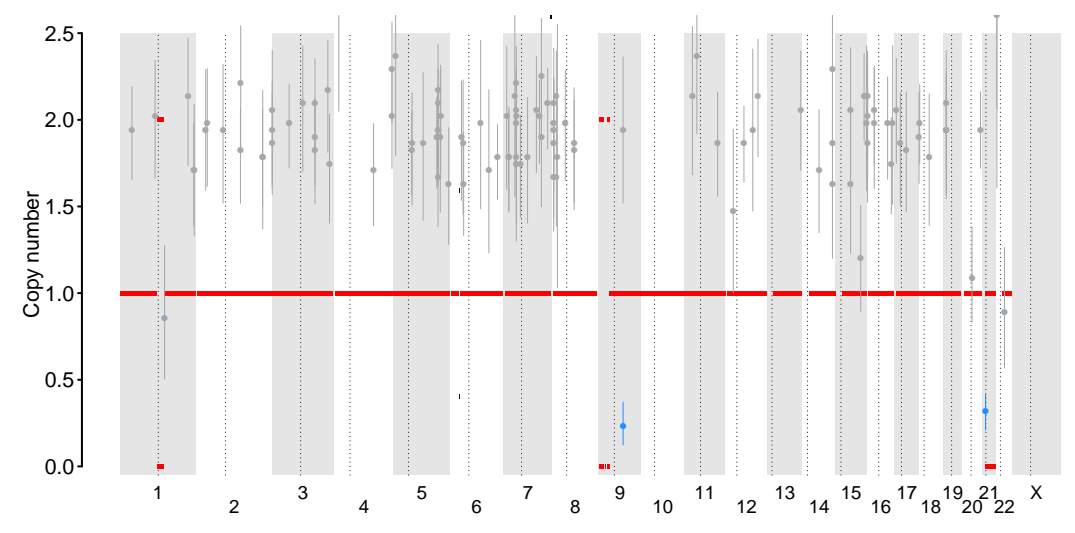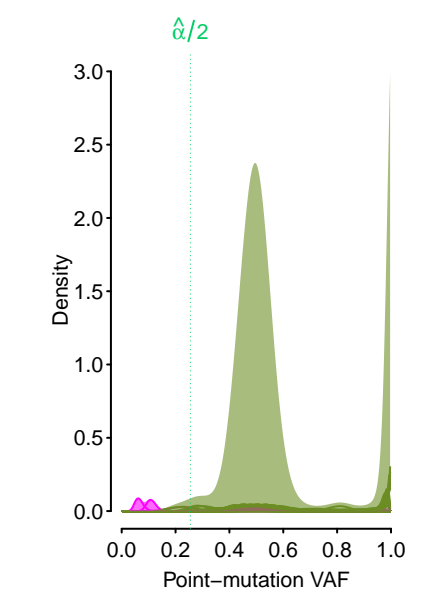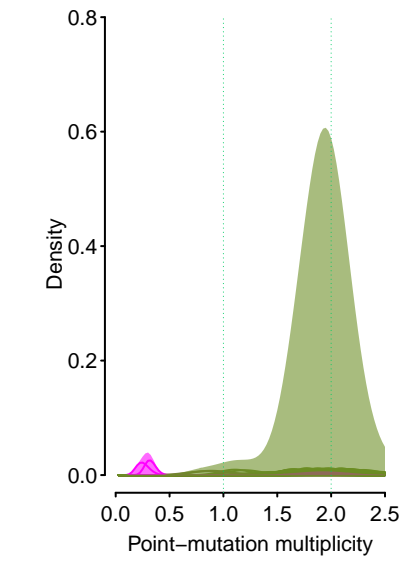

Sample 74

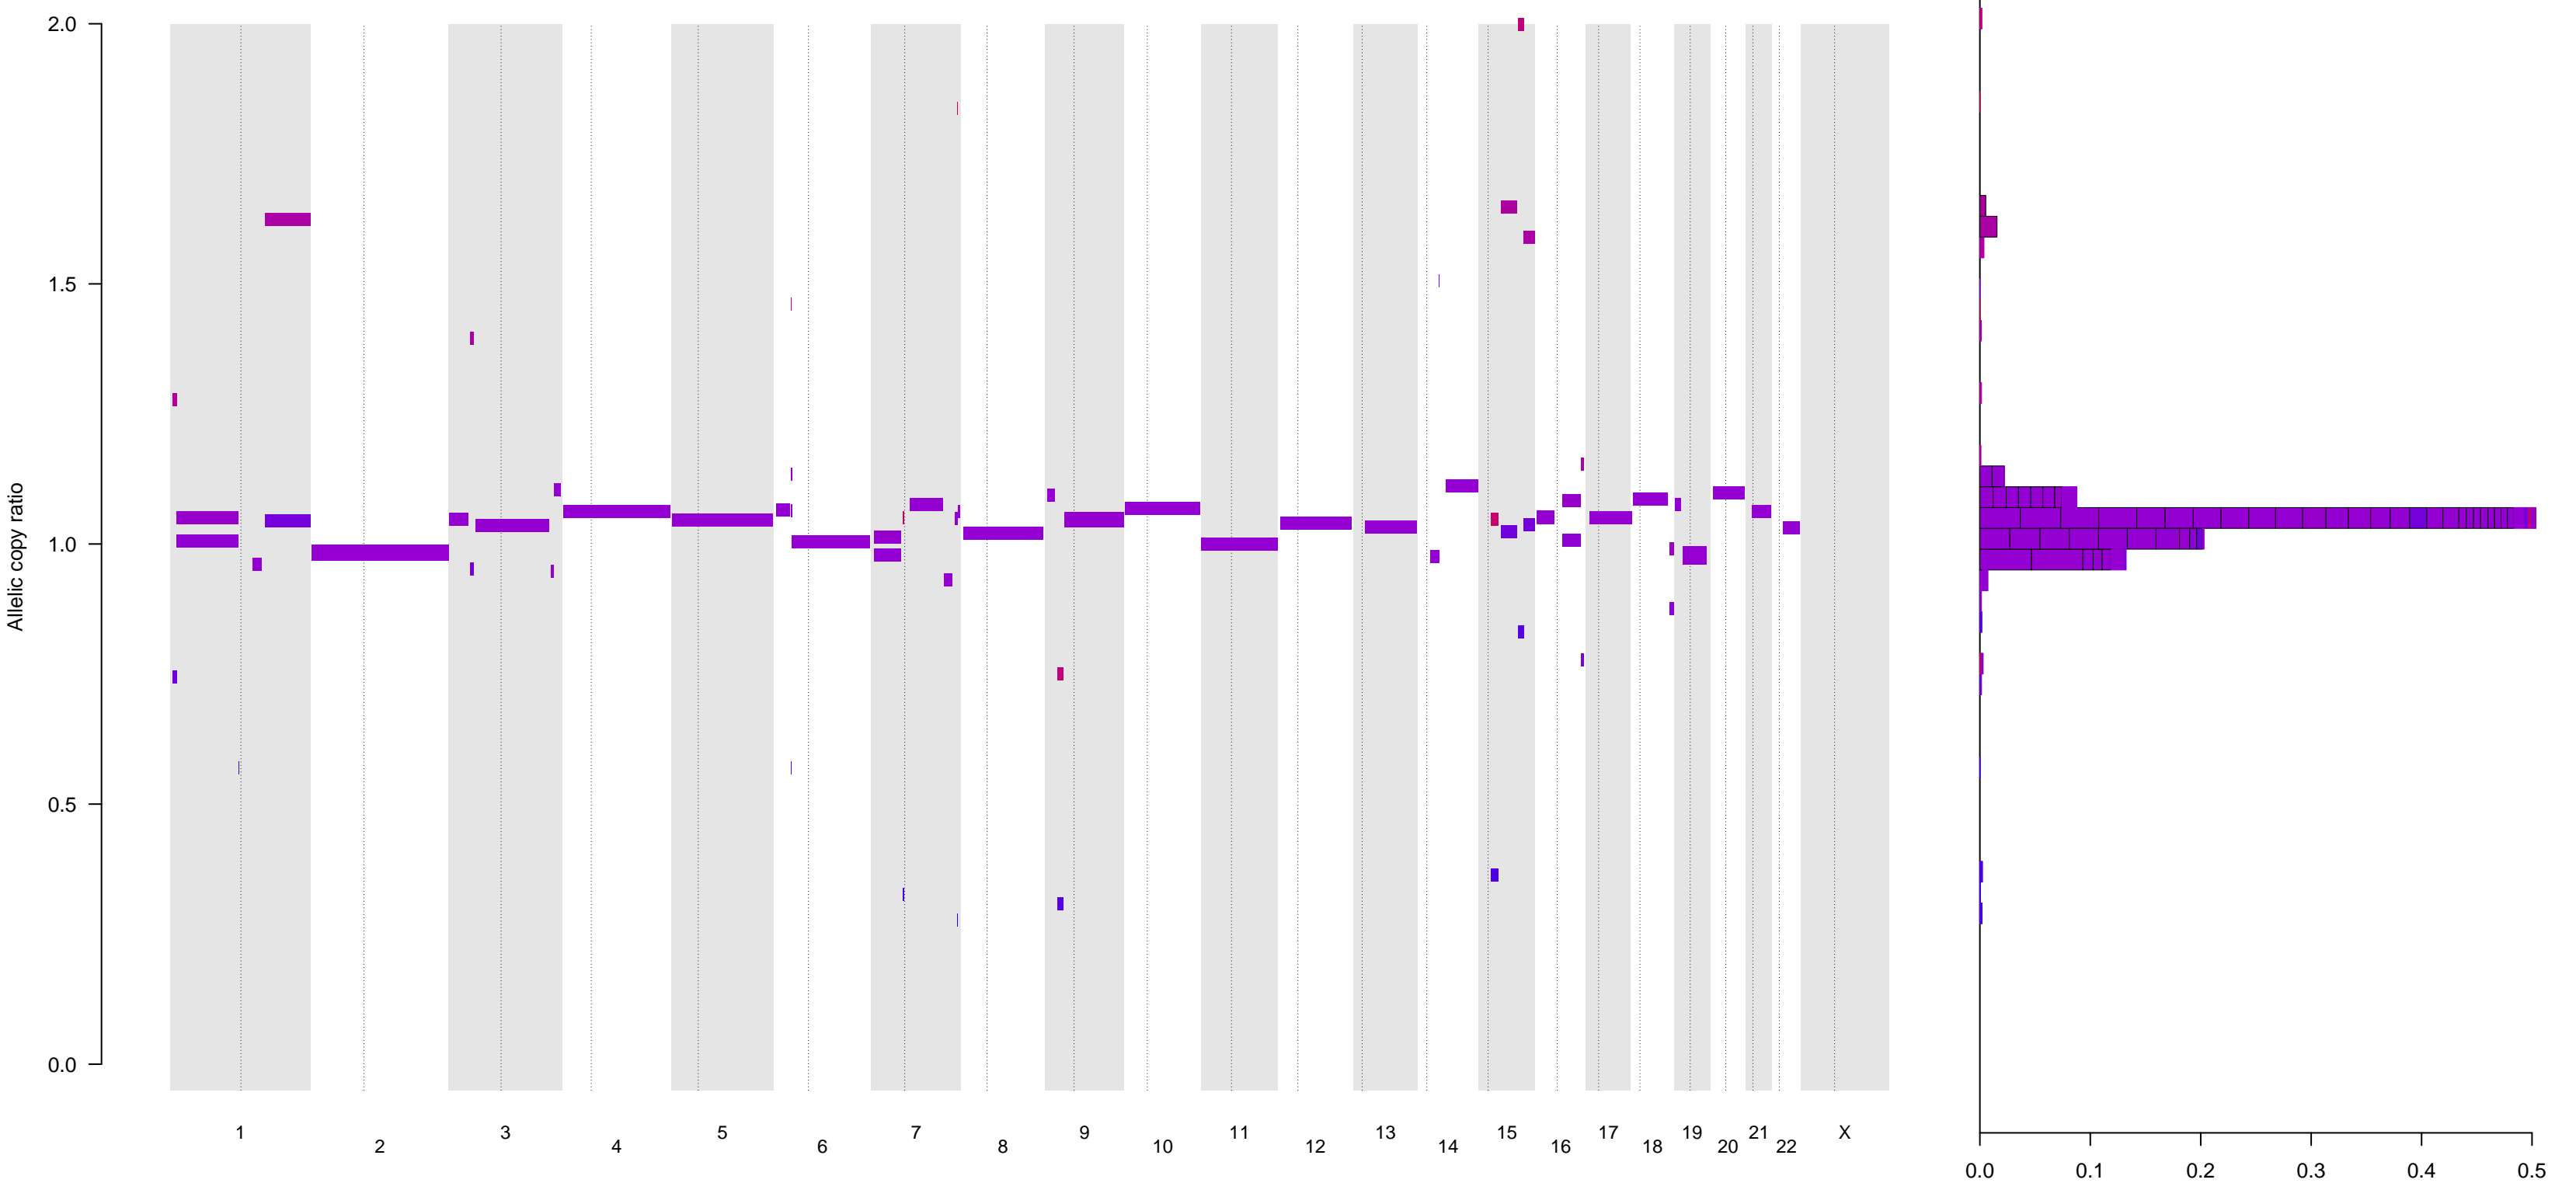

purity( $\hat{\alpha}$ ) = 0.54, ploidy:  $\hat{t} = 1.85$ ,  $\hat{t}_g = 2.05$   
 $\theta_z = 0$ ,  $\theta_0 = 1.289$ , WGD=0  
 SCNA LL = -305.9, SSNV LL = -2592.53, SCNA Ev = -35.07785

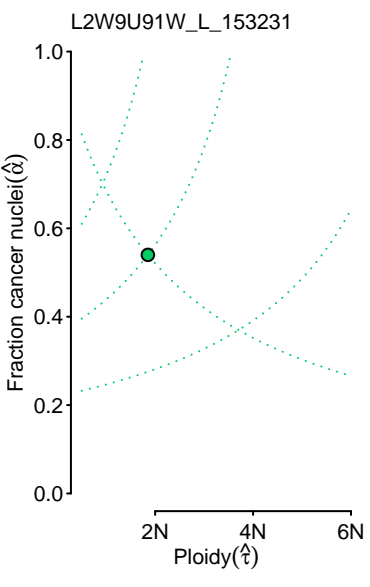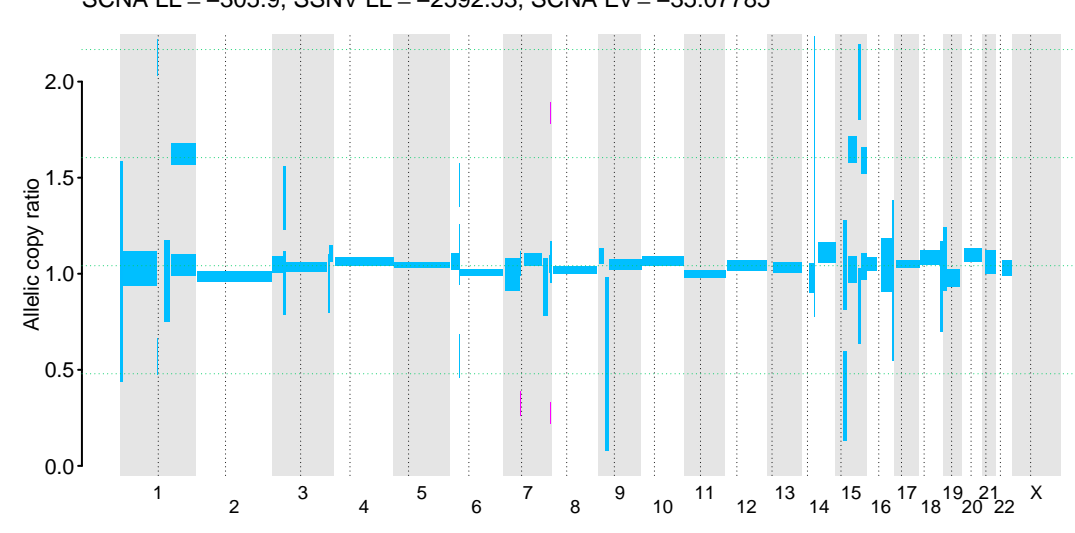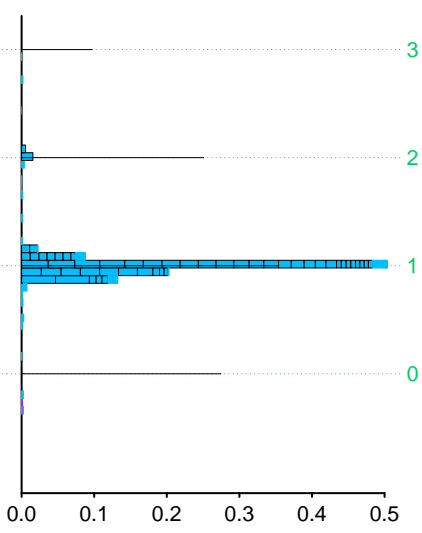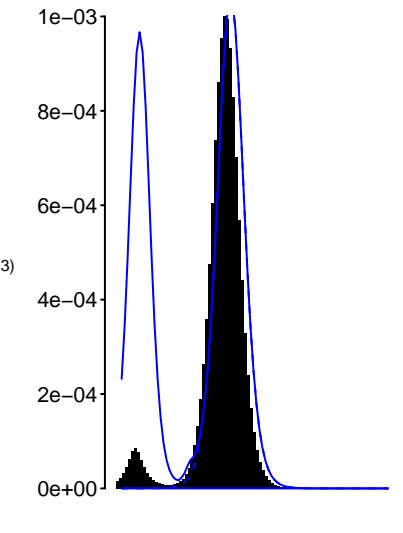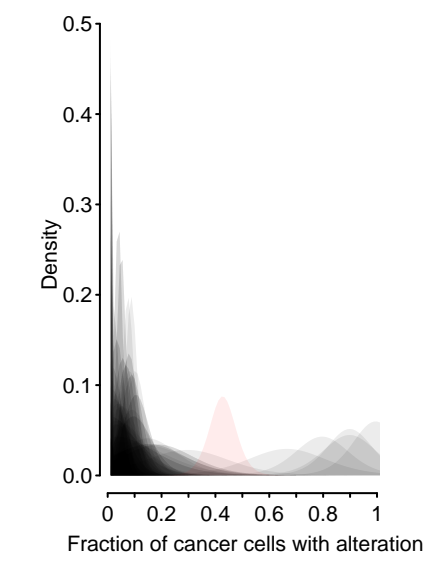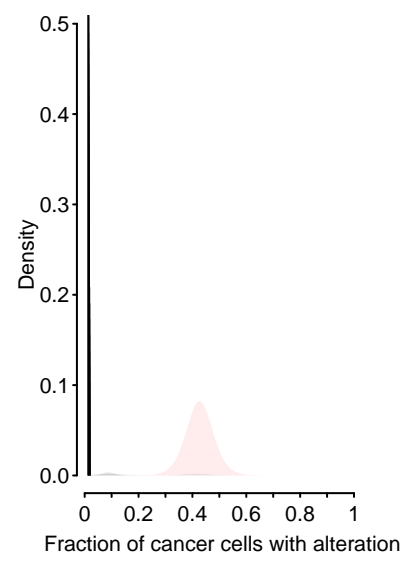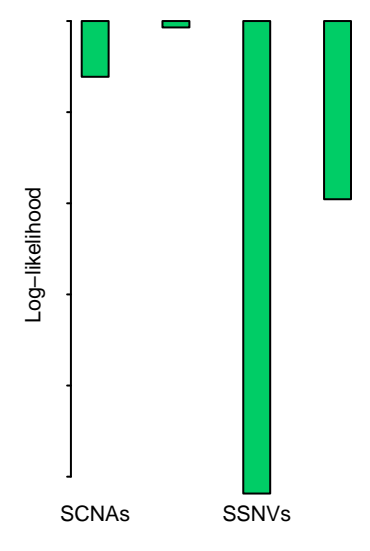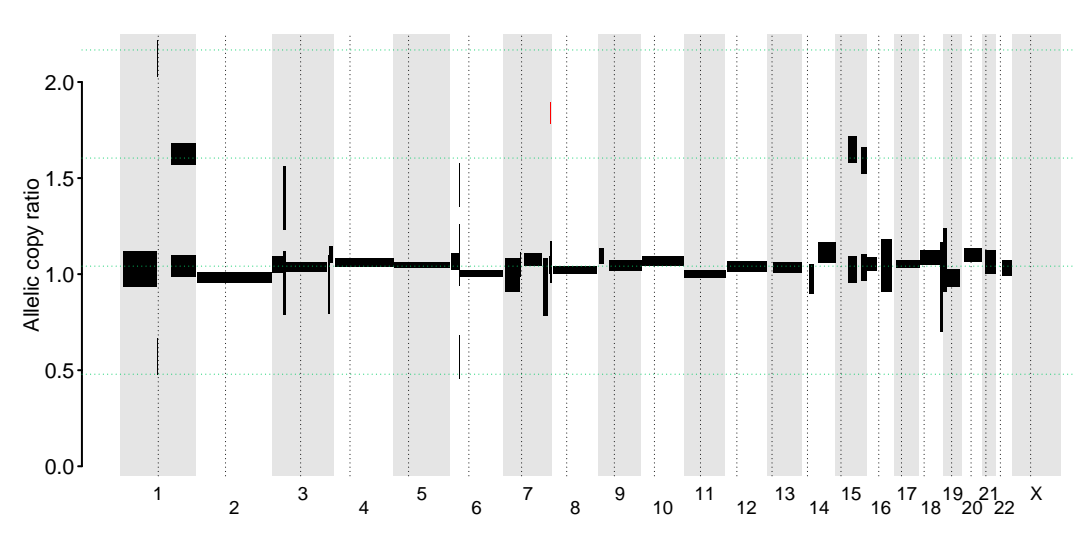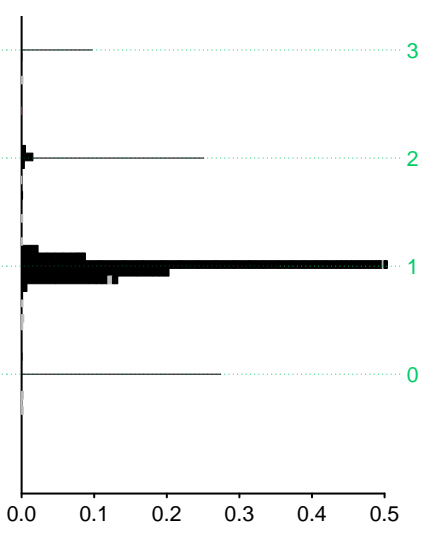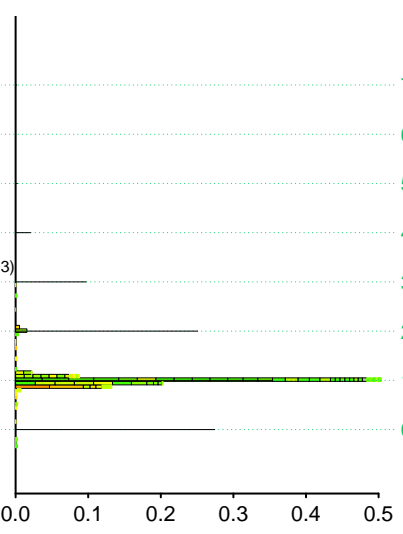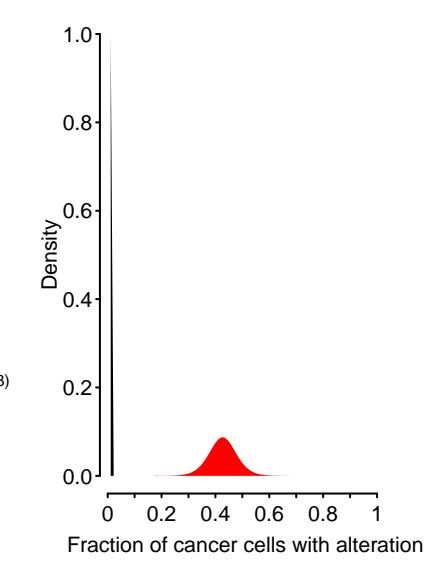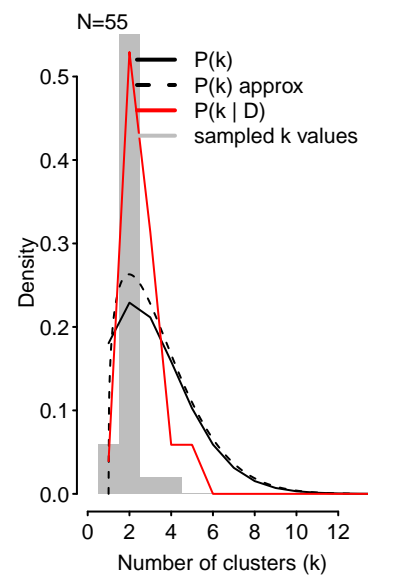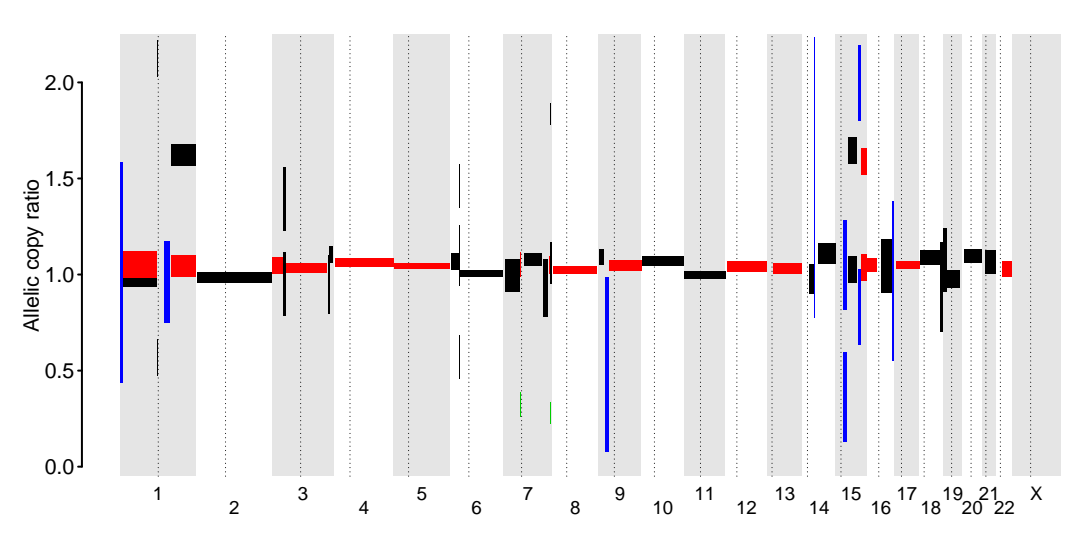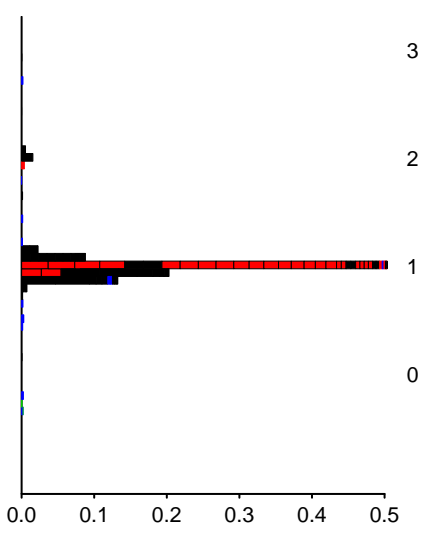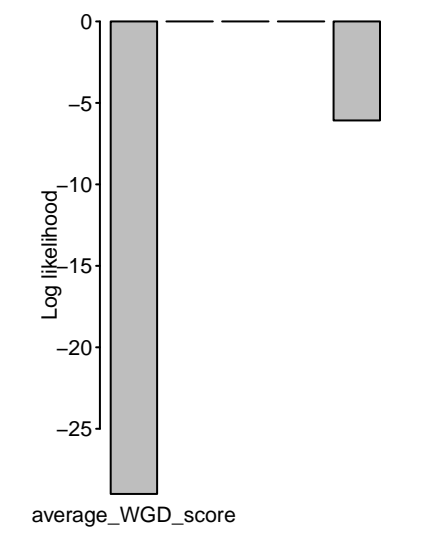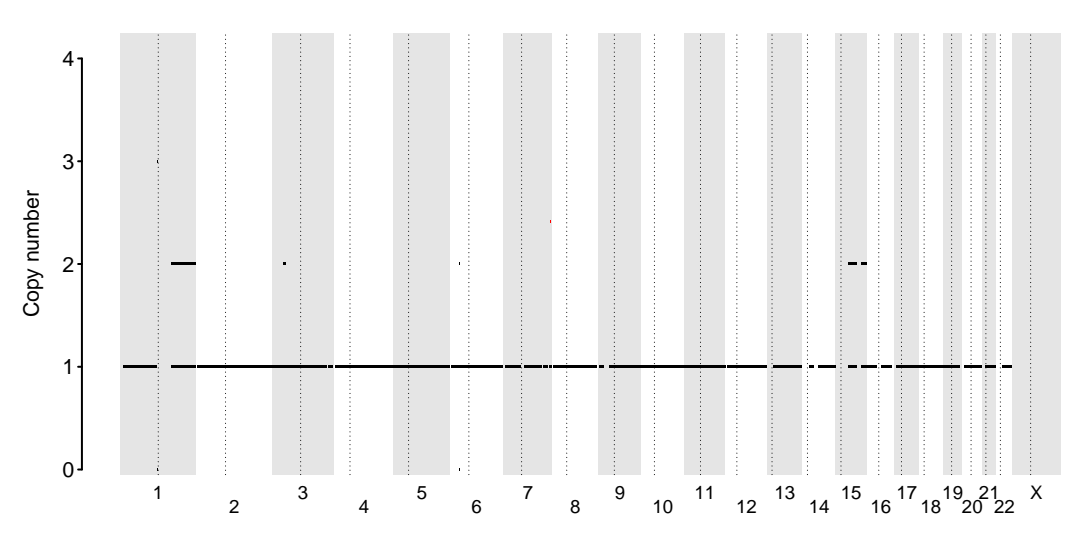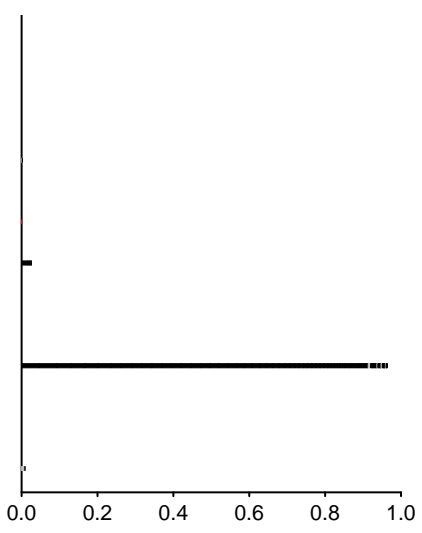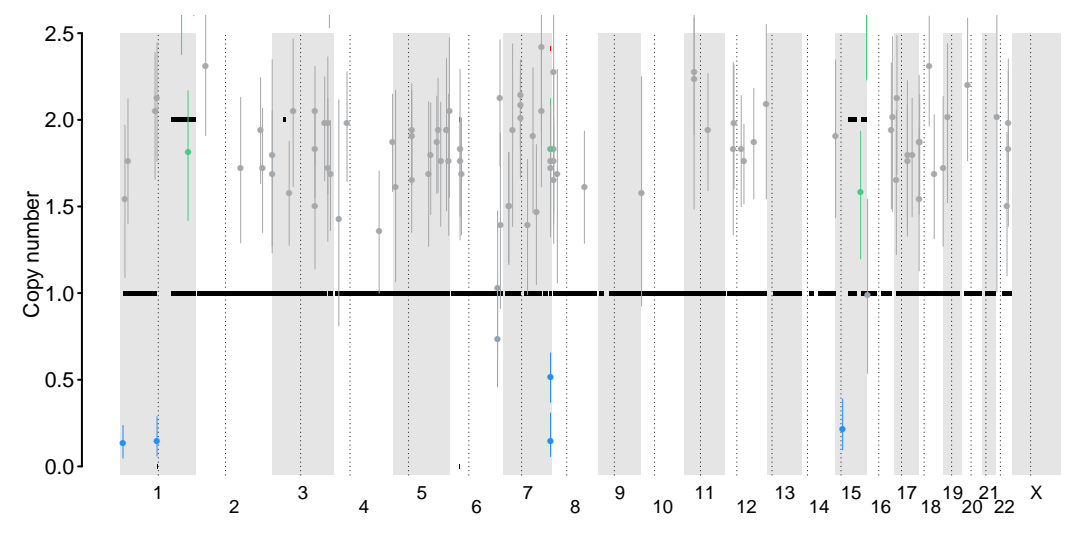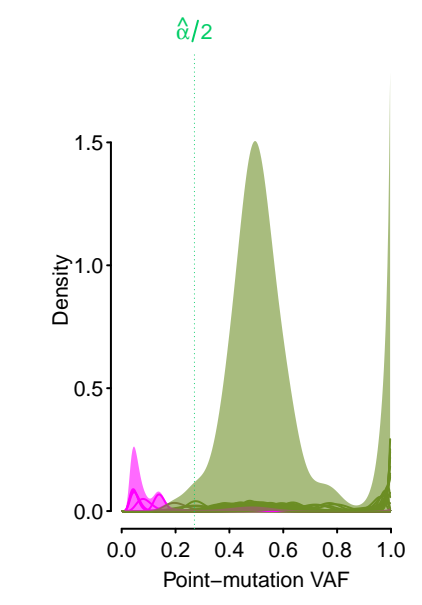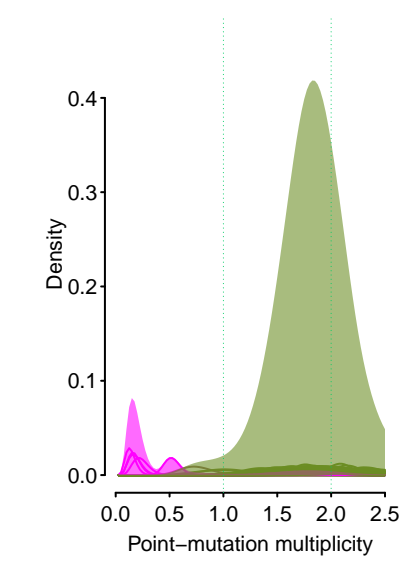



Sample 75

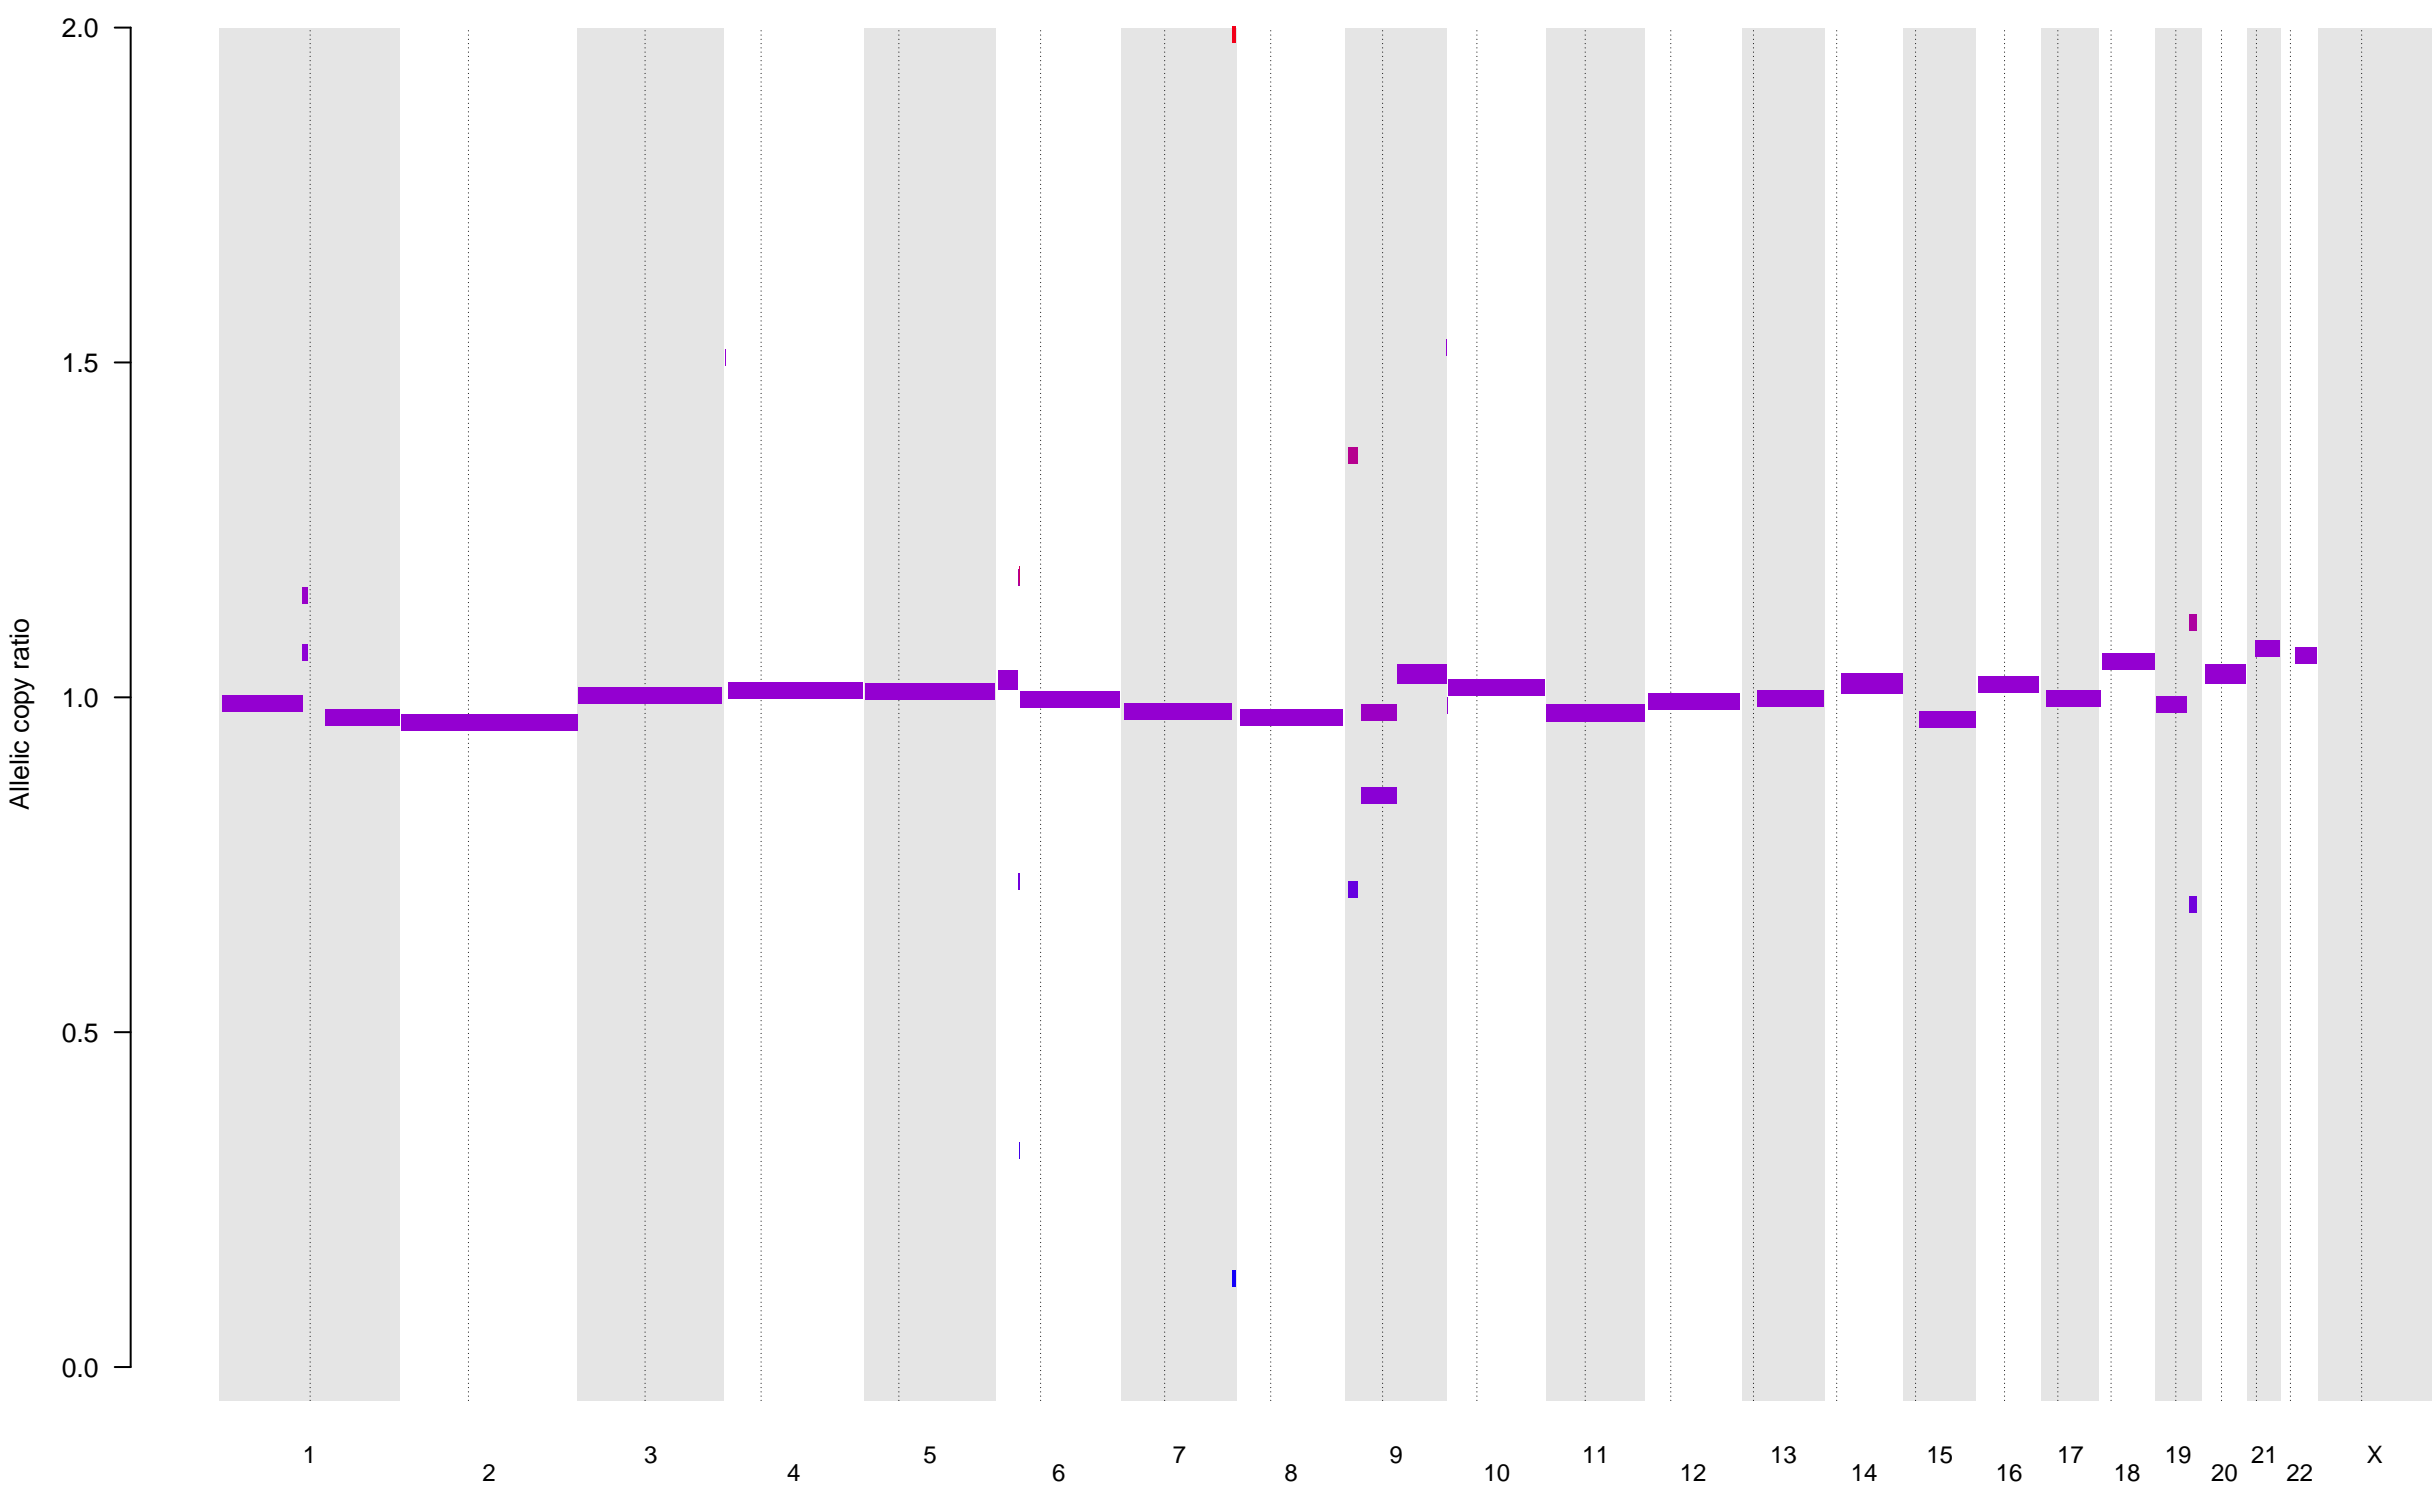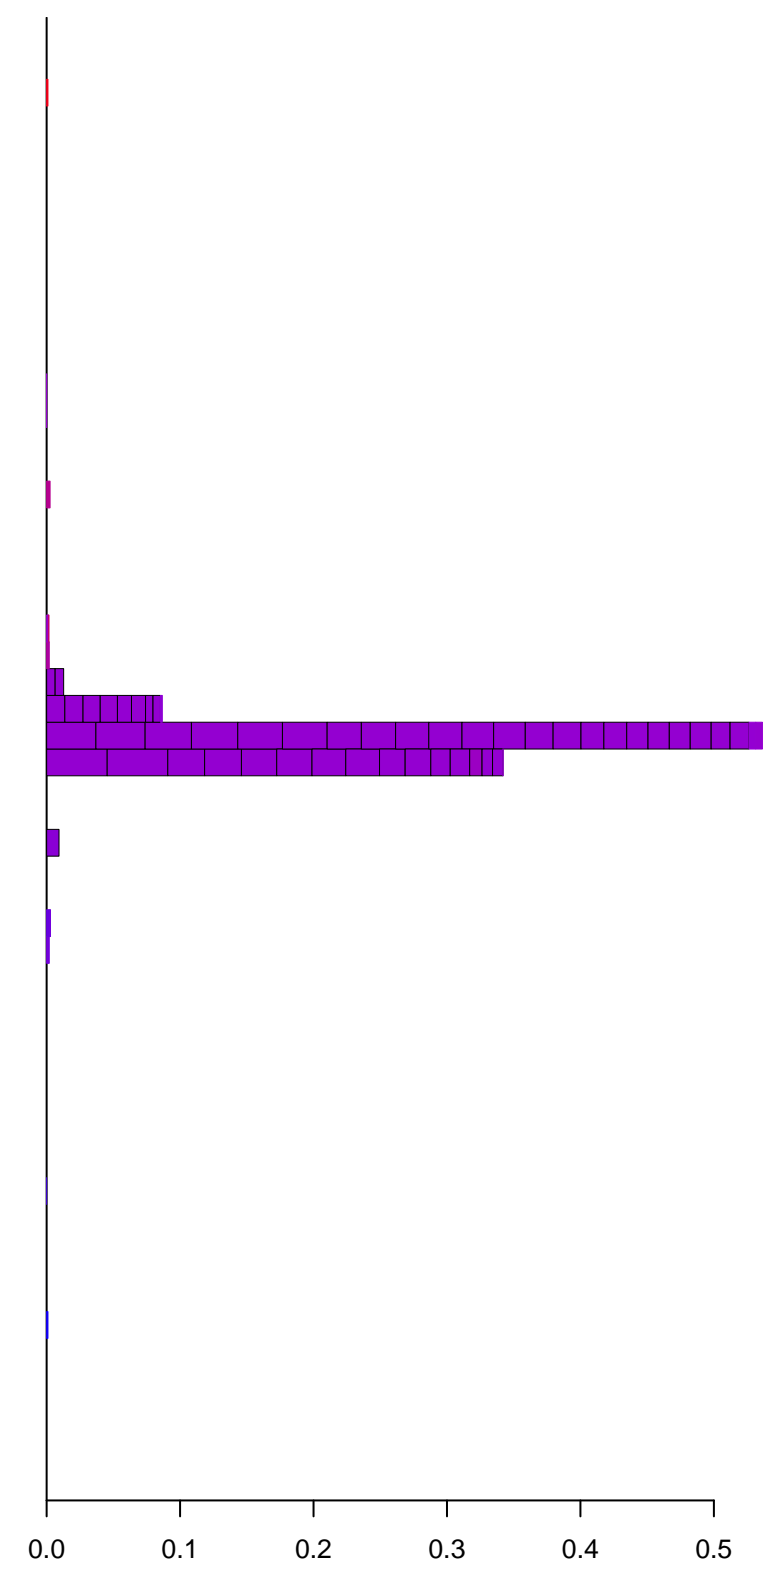

$\hat{\alpha} = 0.33$ , ploidy:  $\hat{\tau} = 2.02$ ,  $\hat{\tau}_g = 2$   
 $\theta_z = 0.01$ ,  $\theta_G = 1.431$ , WGD=0  
 SCNA LL = -231.41, SSNV LL = -8297.73, SCNA Ev = -29.60161

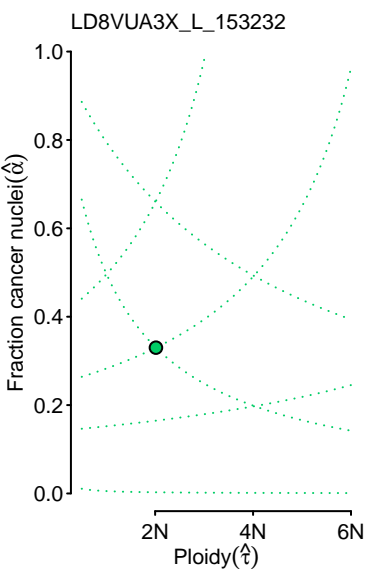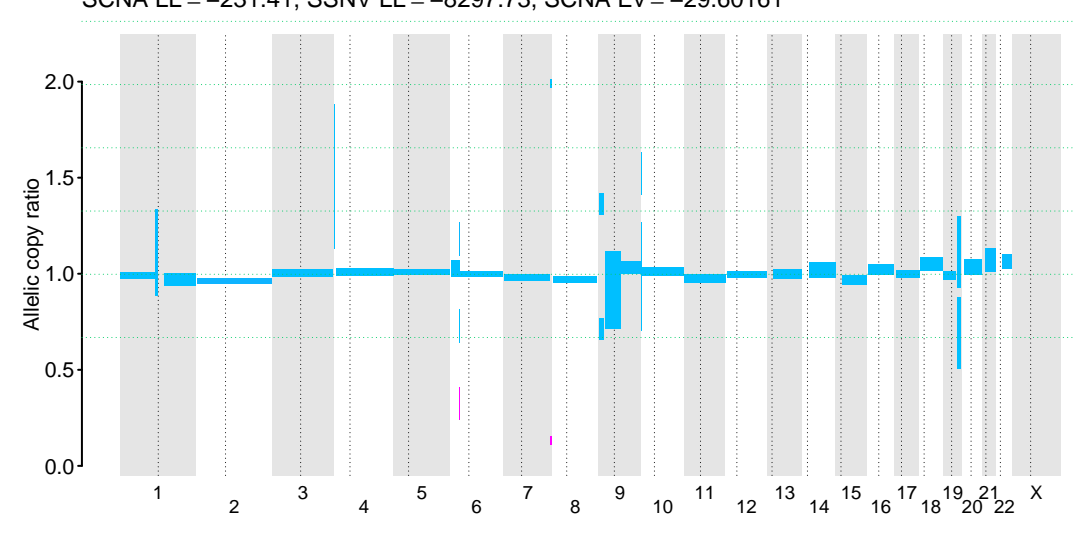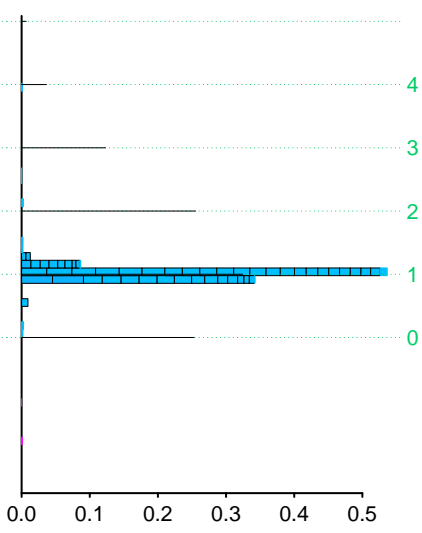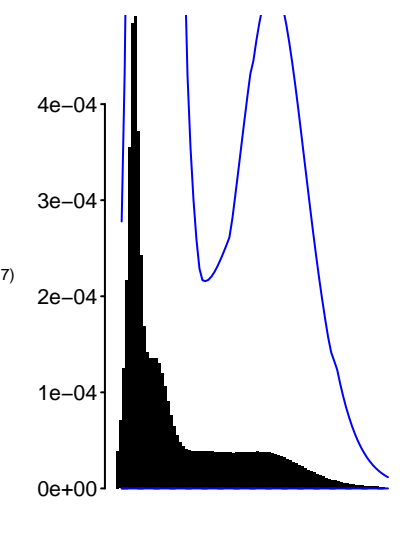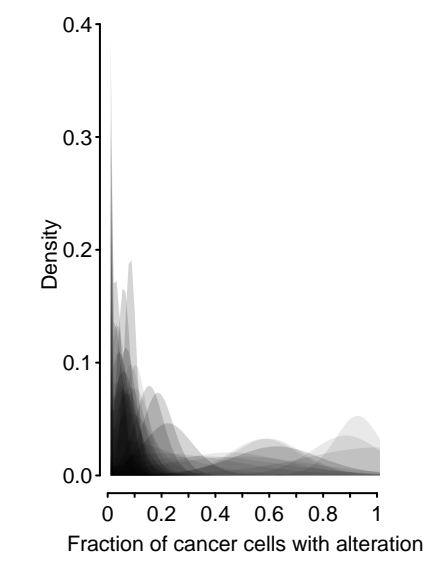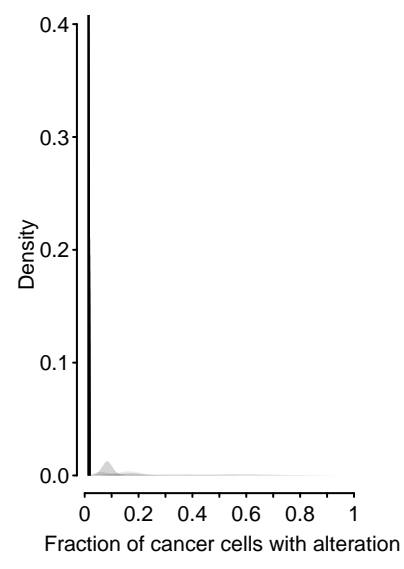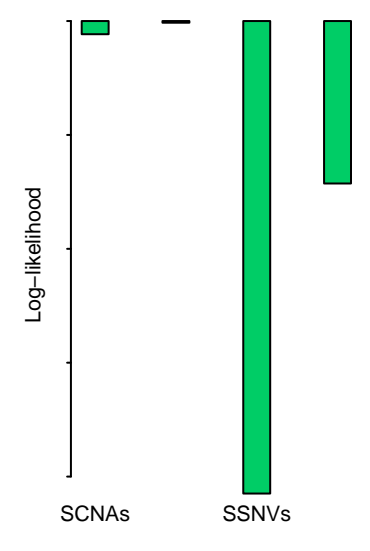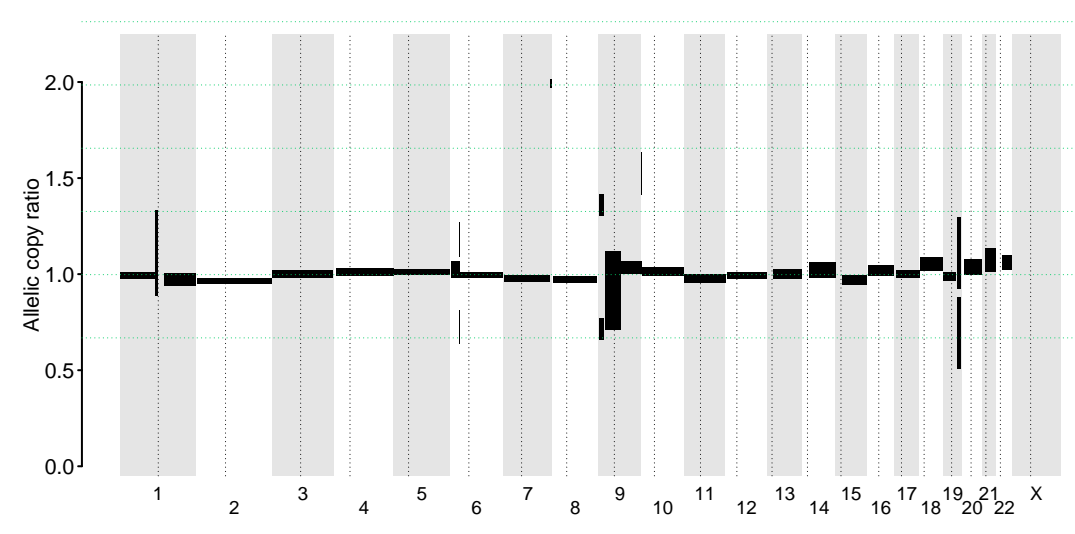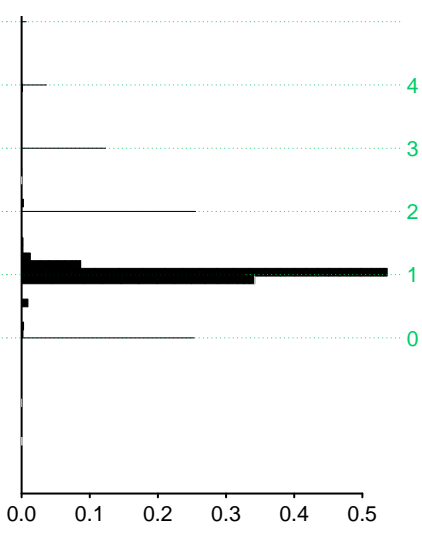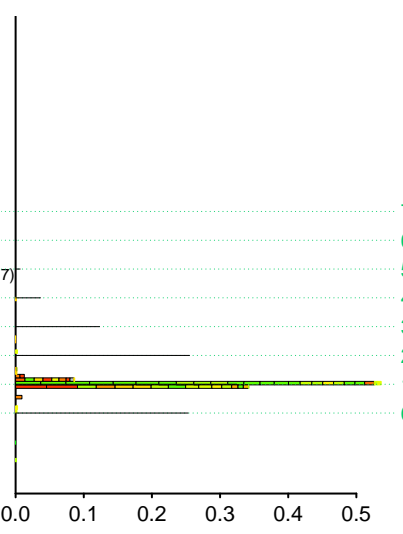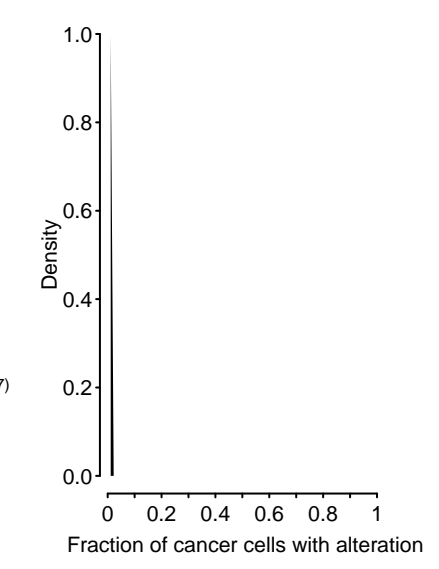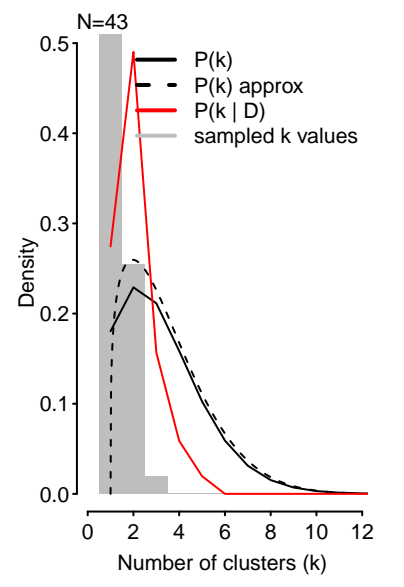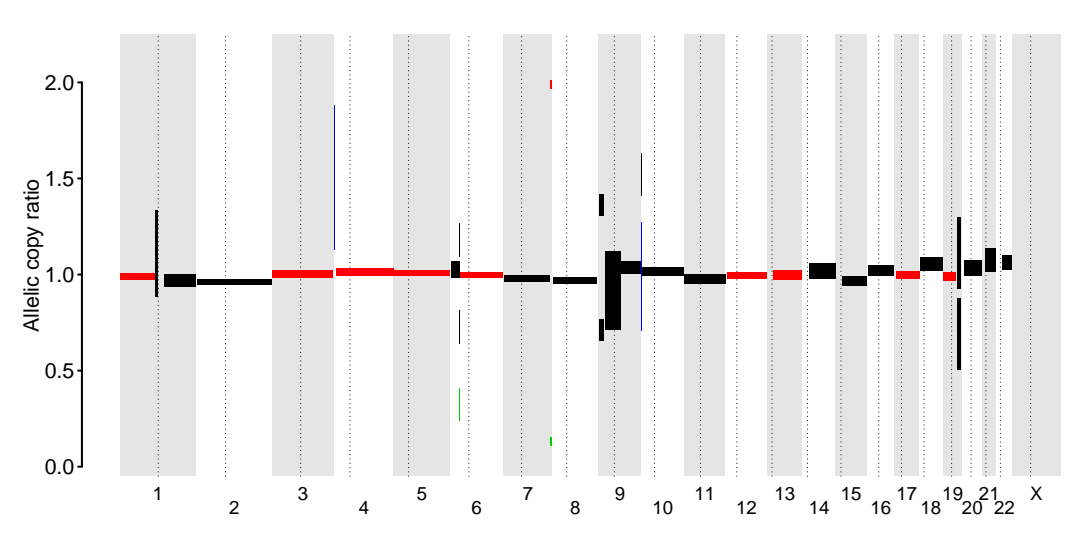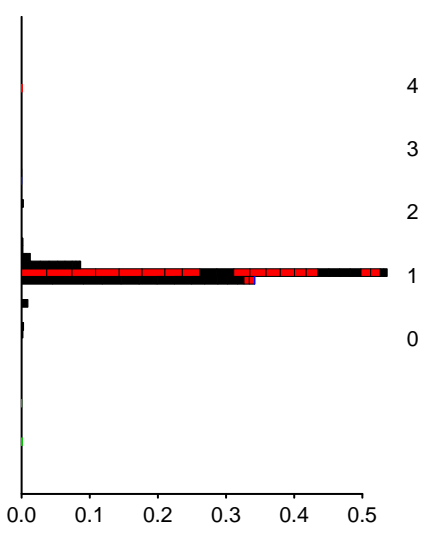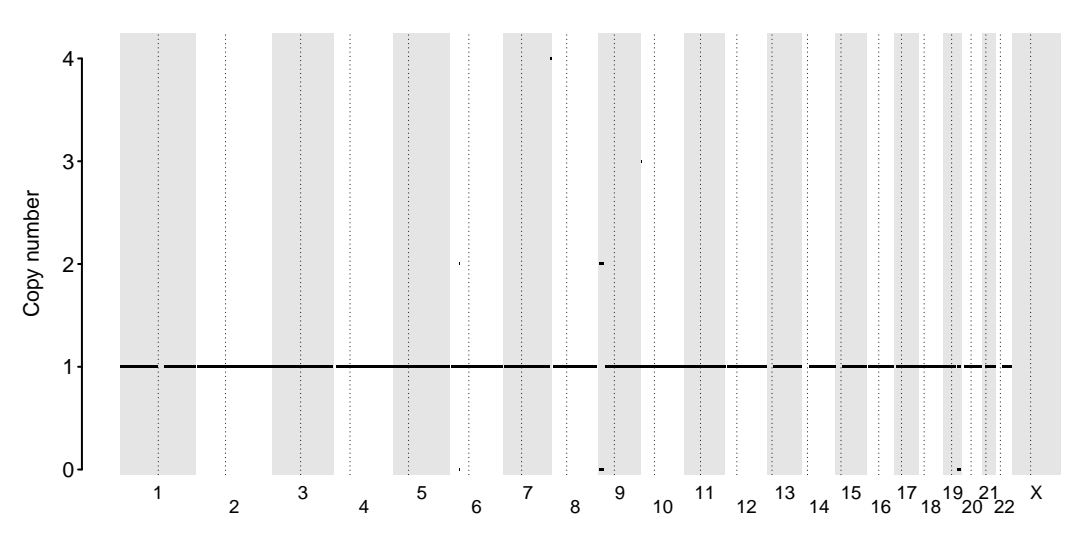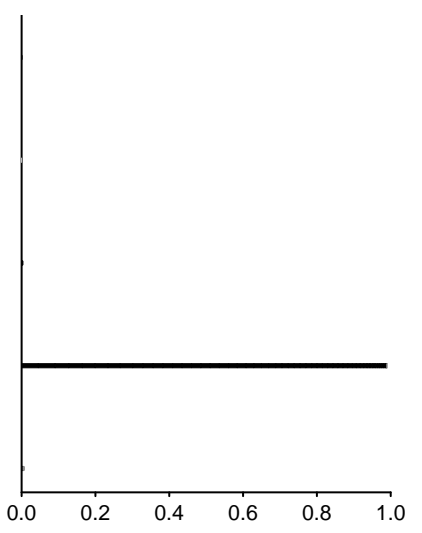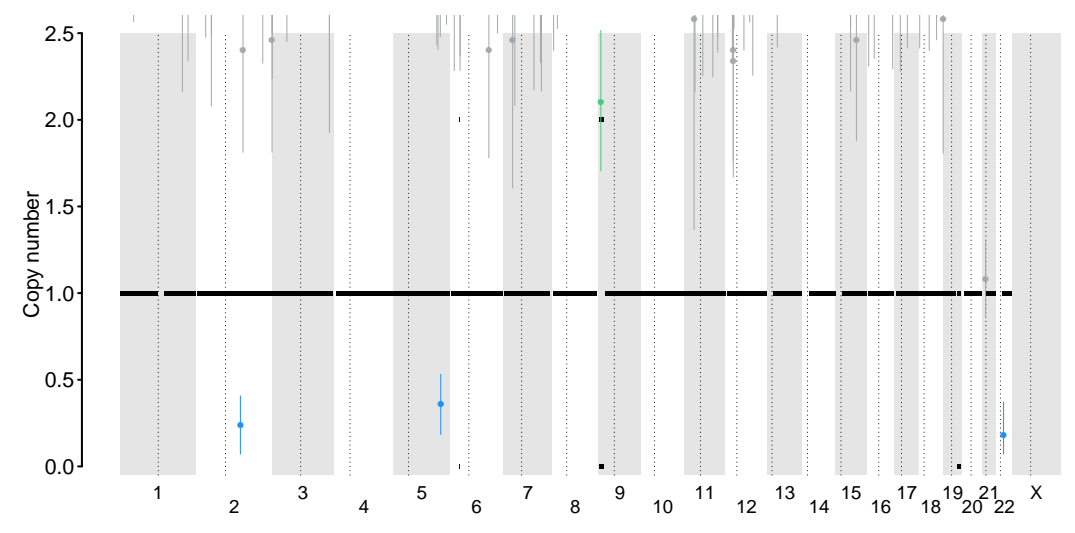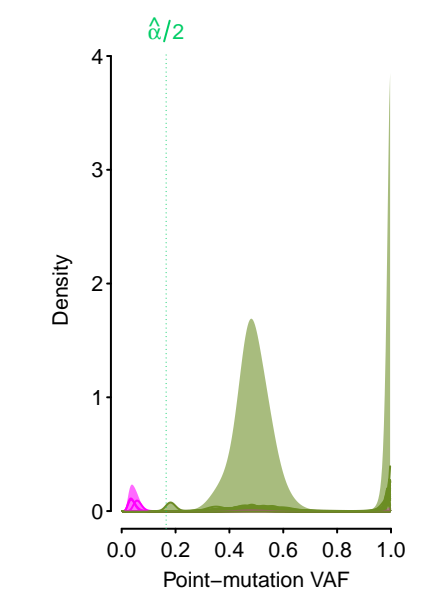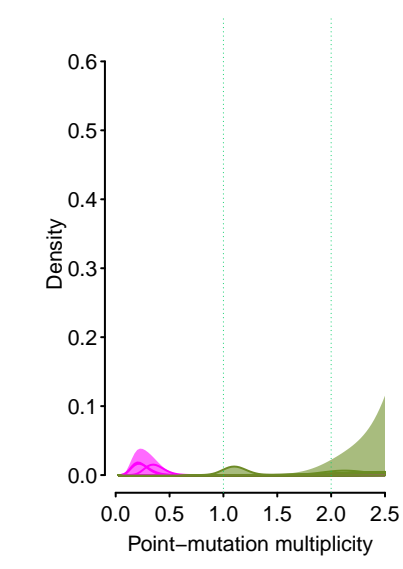

Sample 77

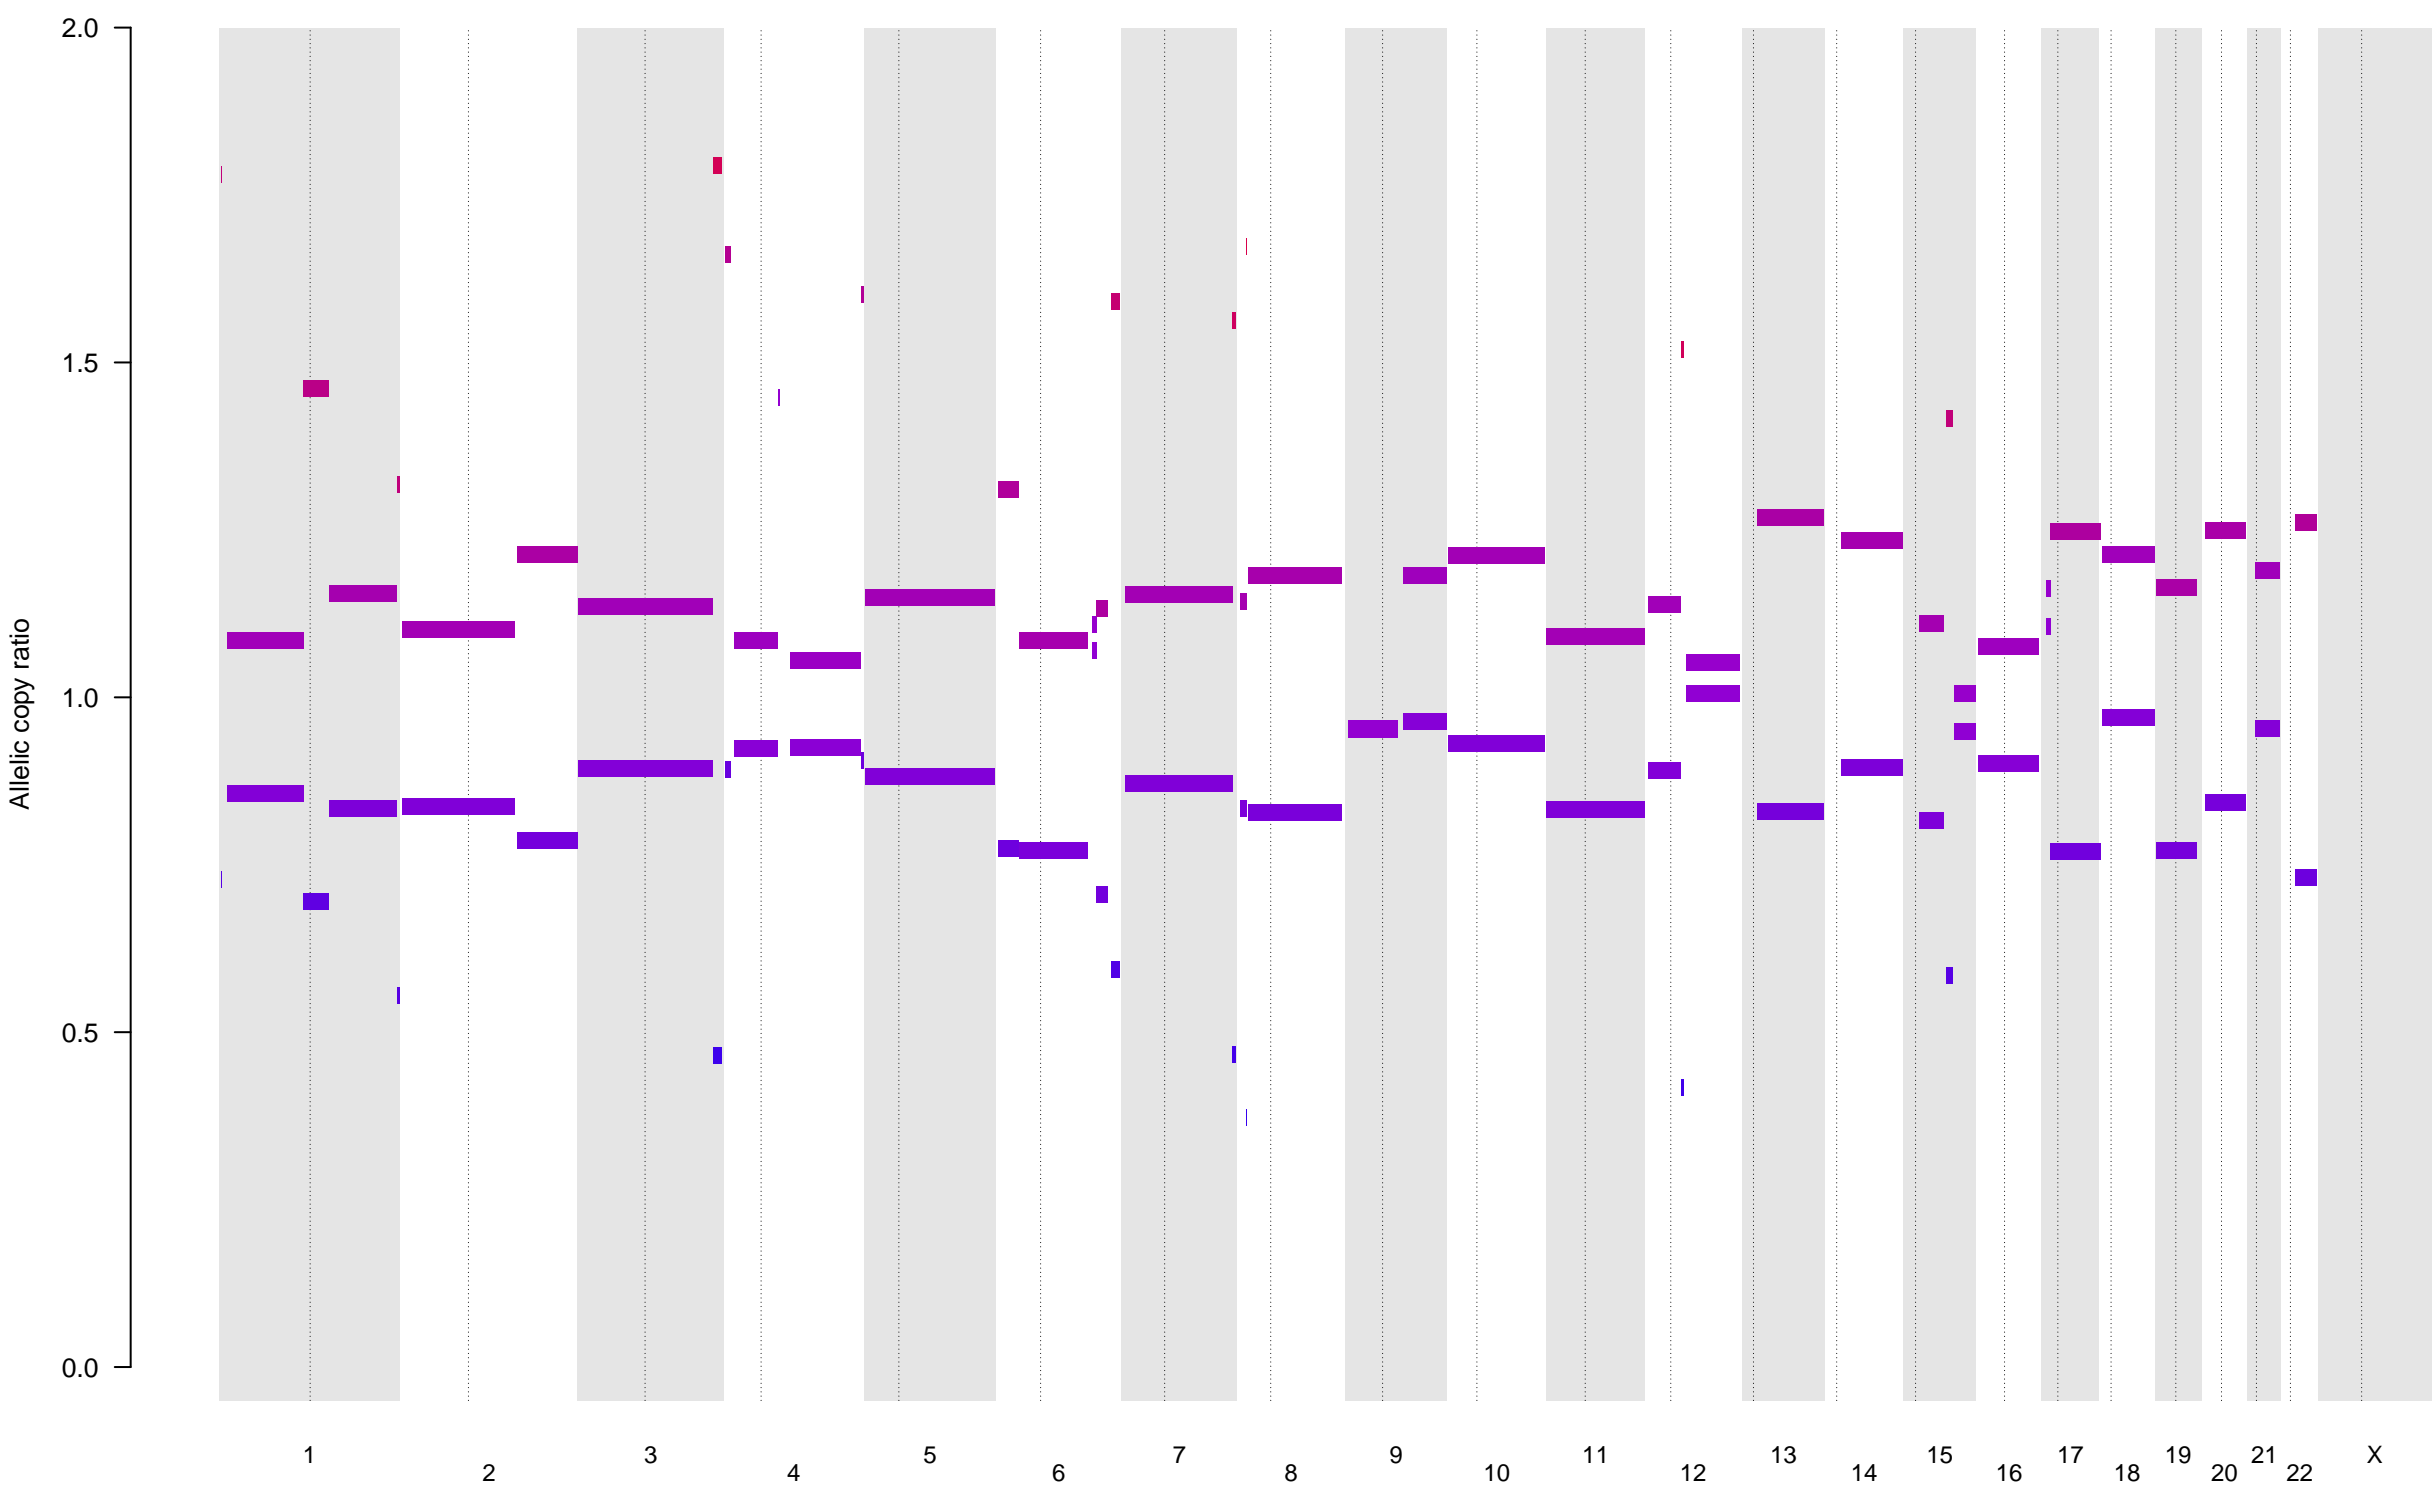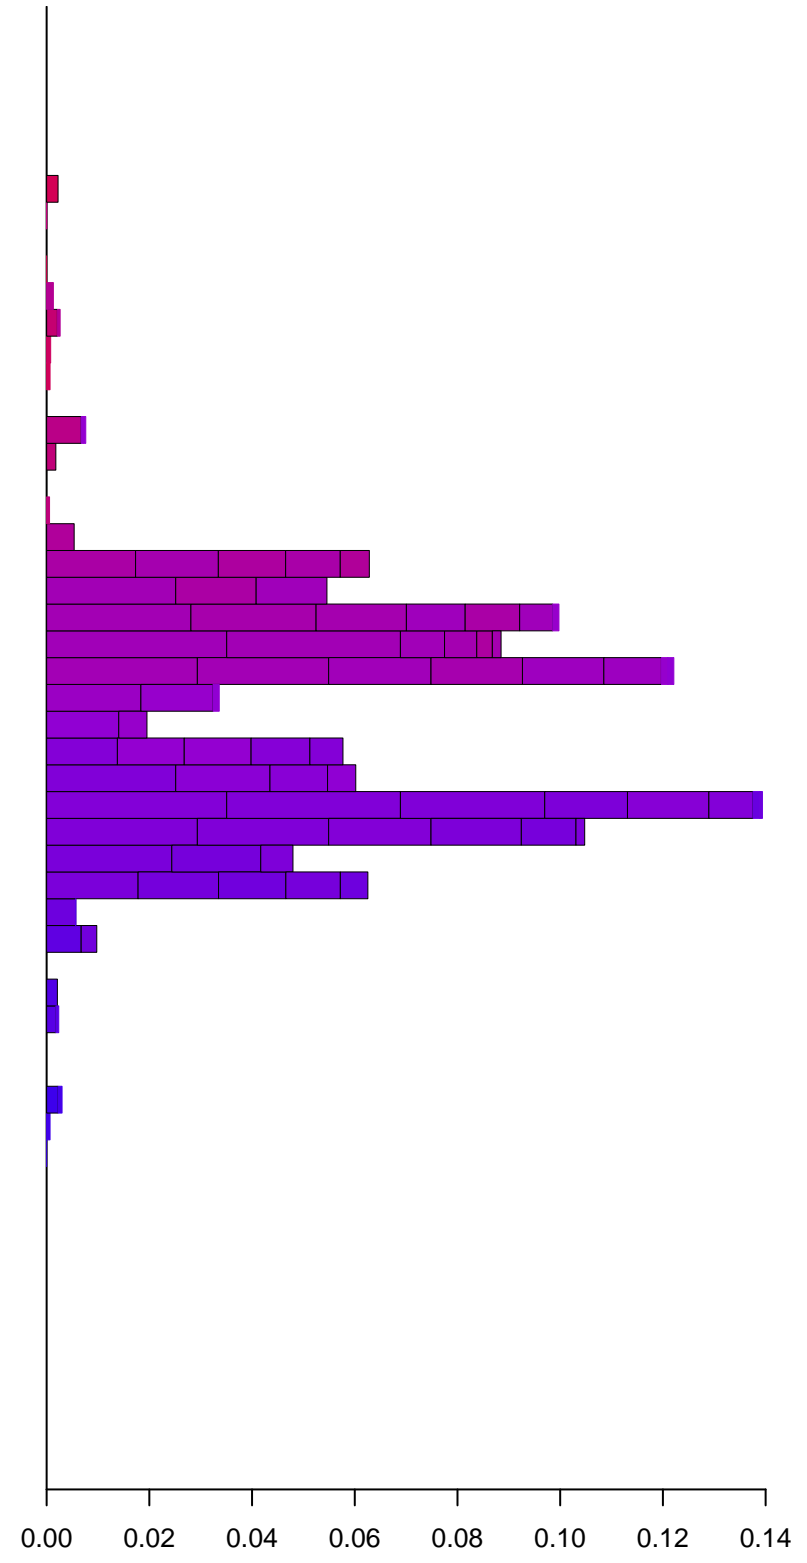

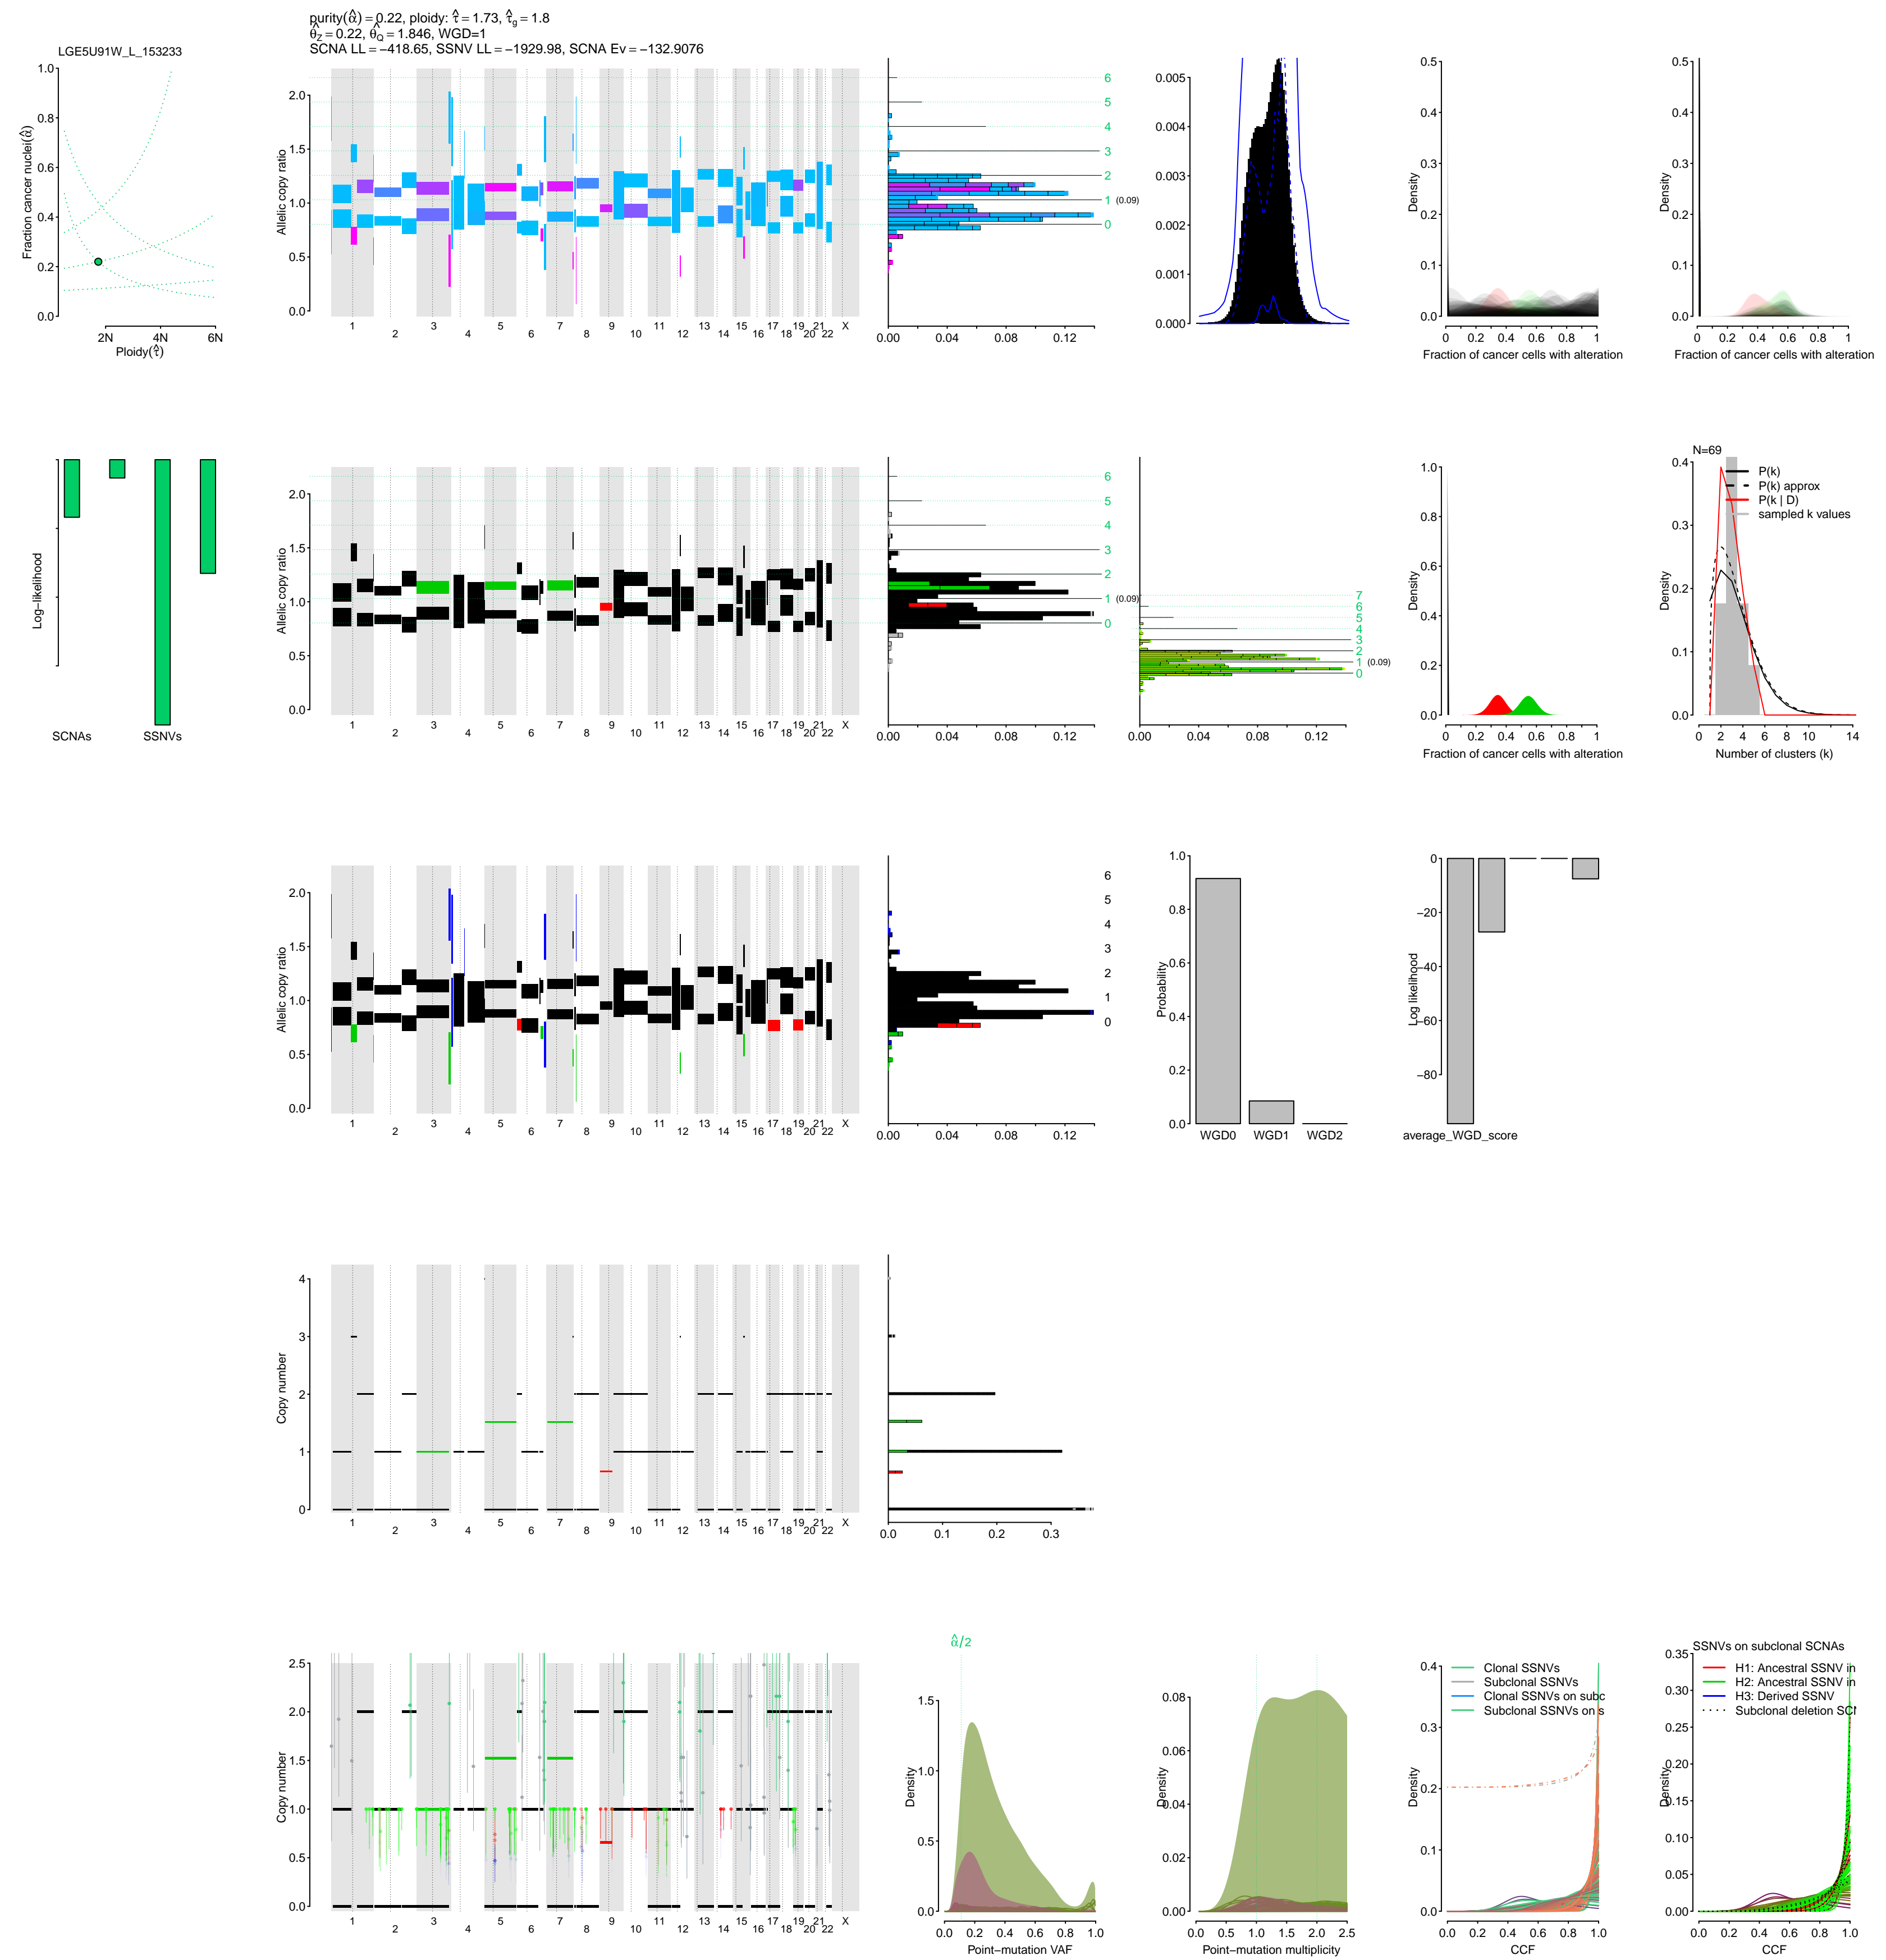

Sample 78

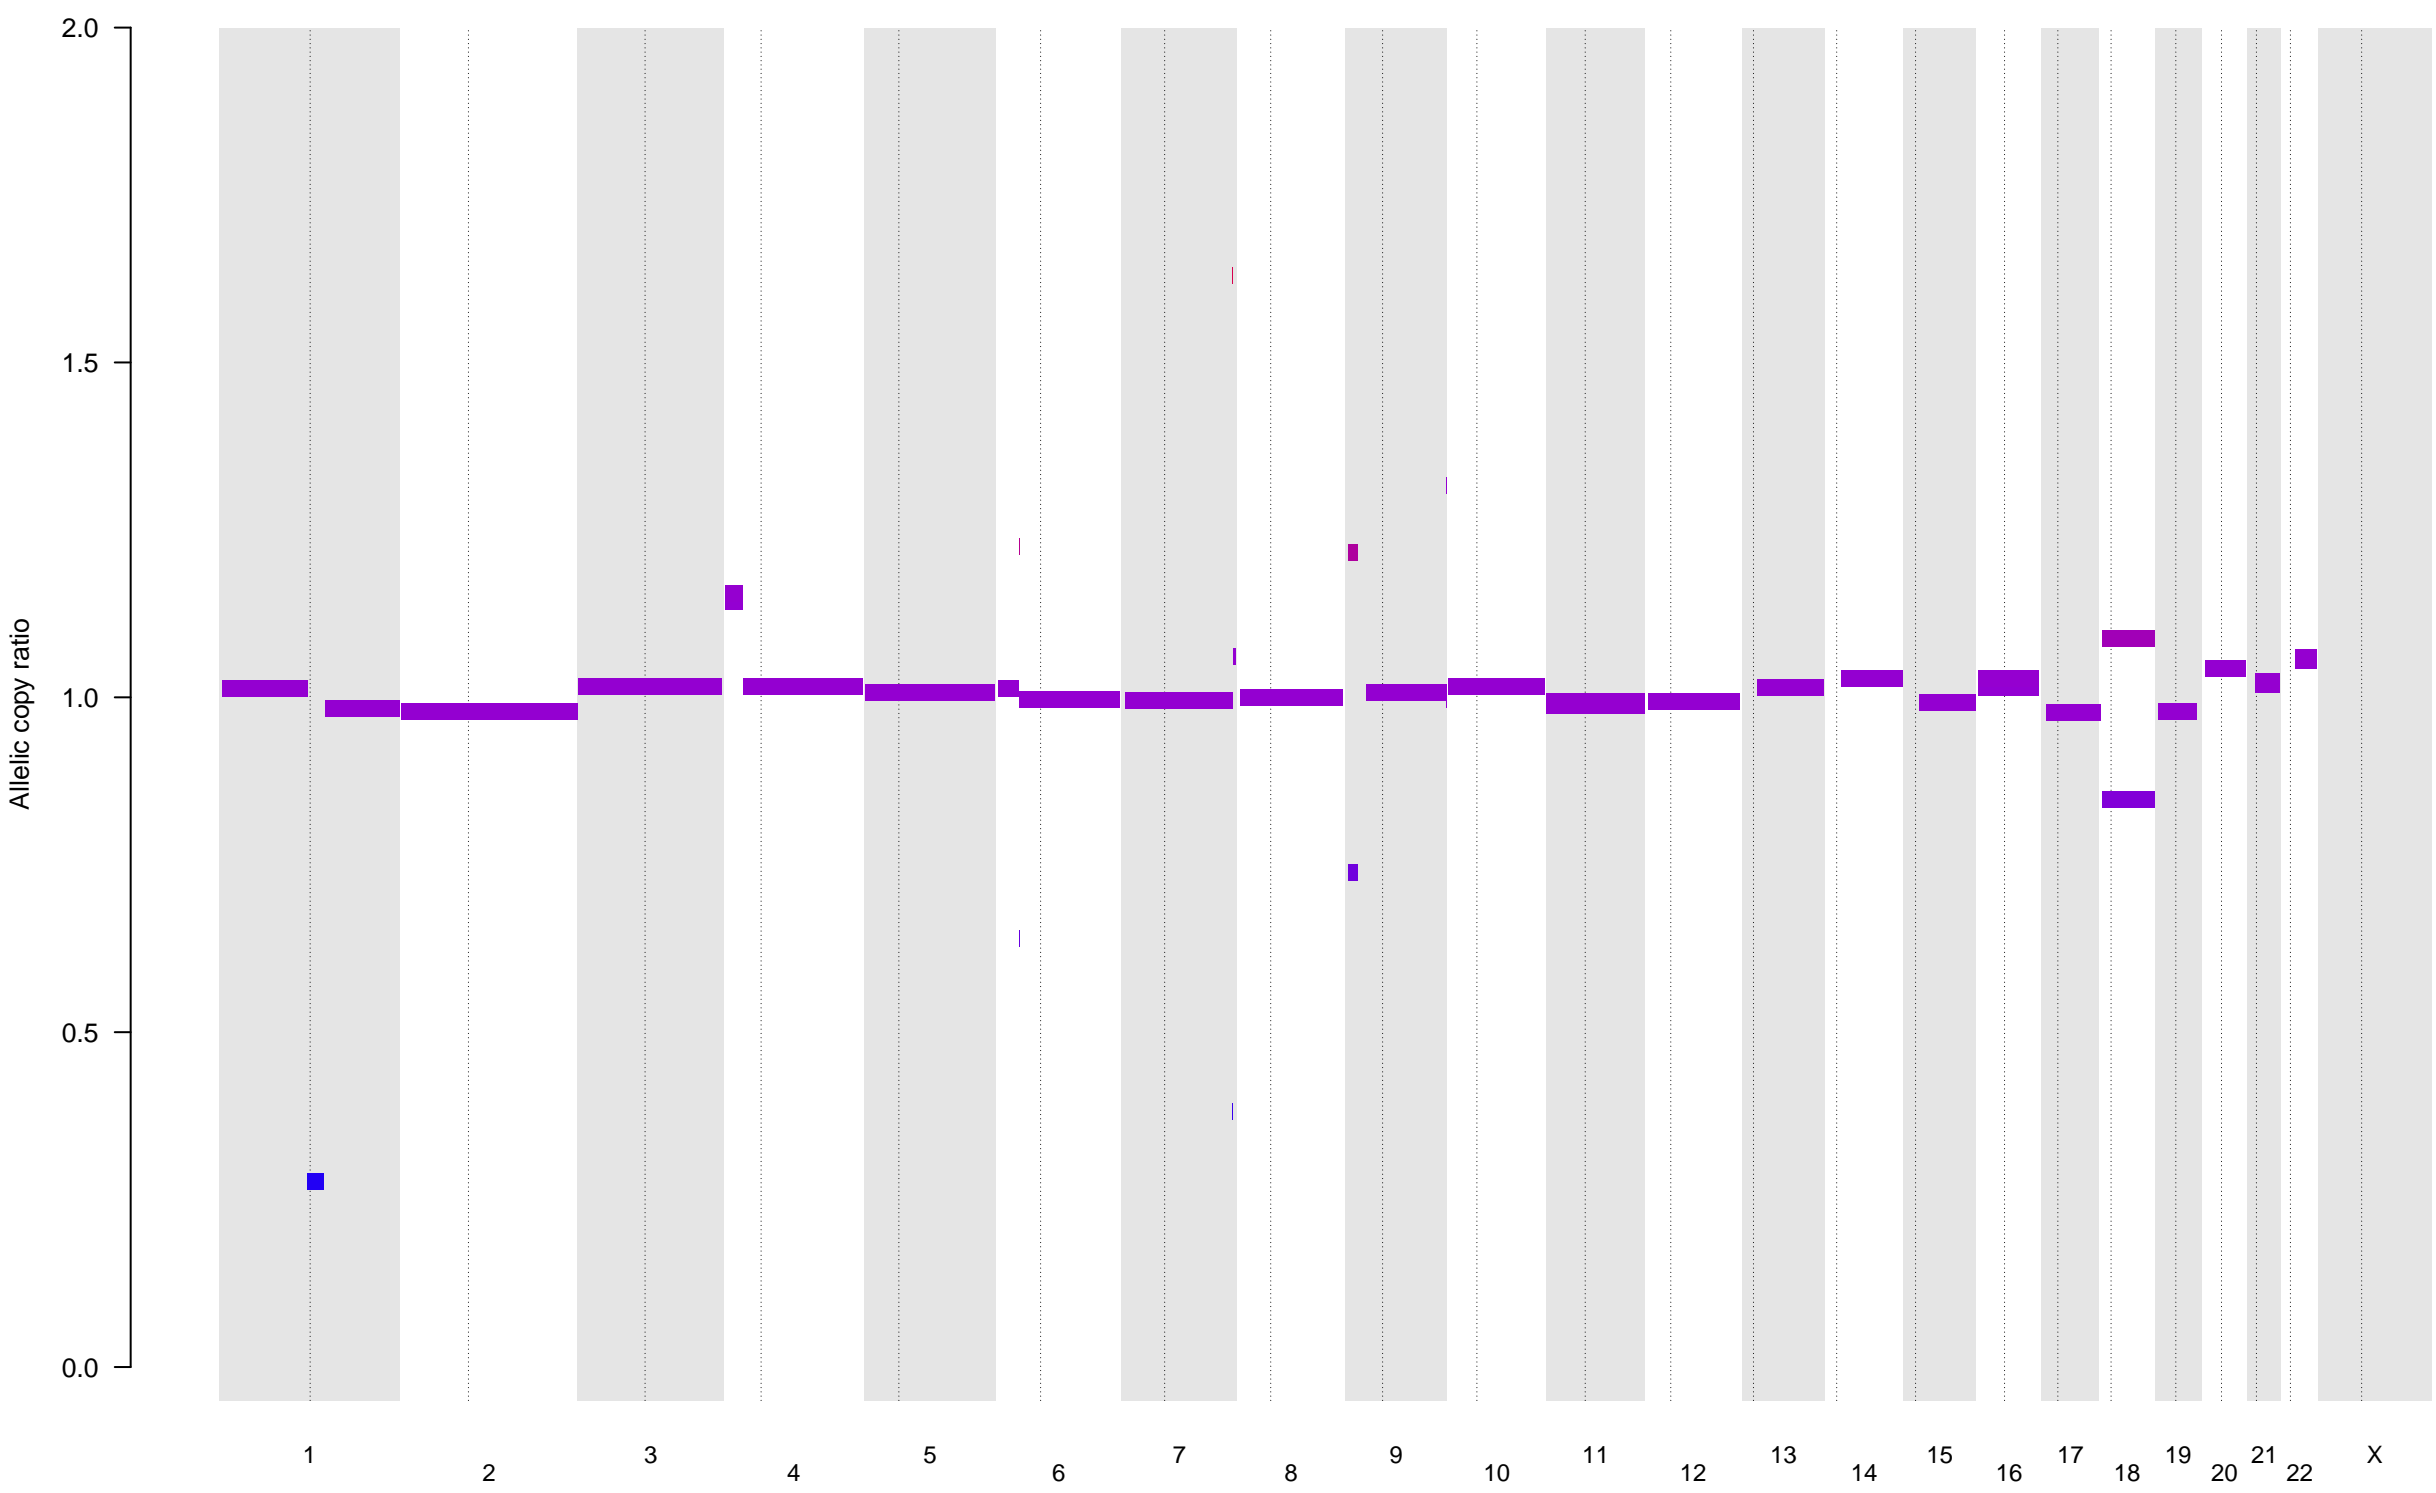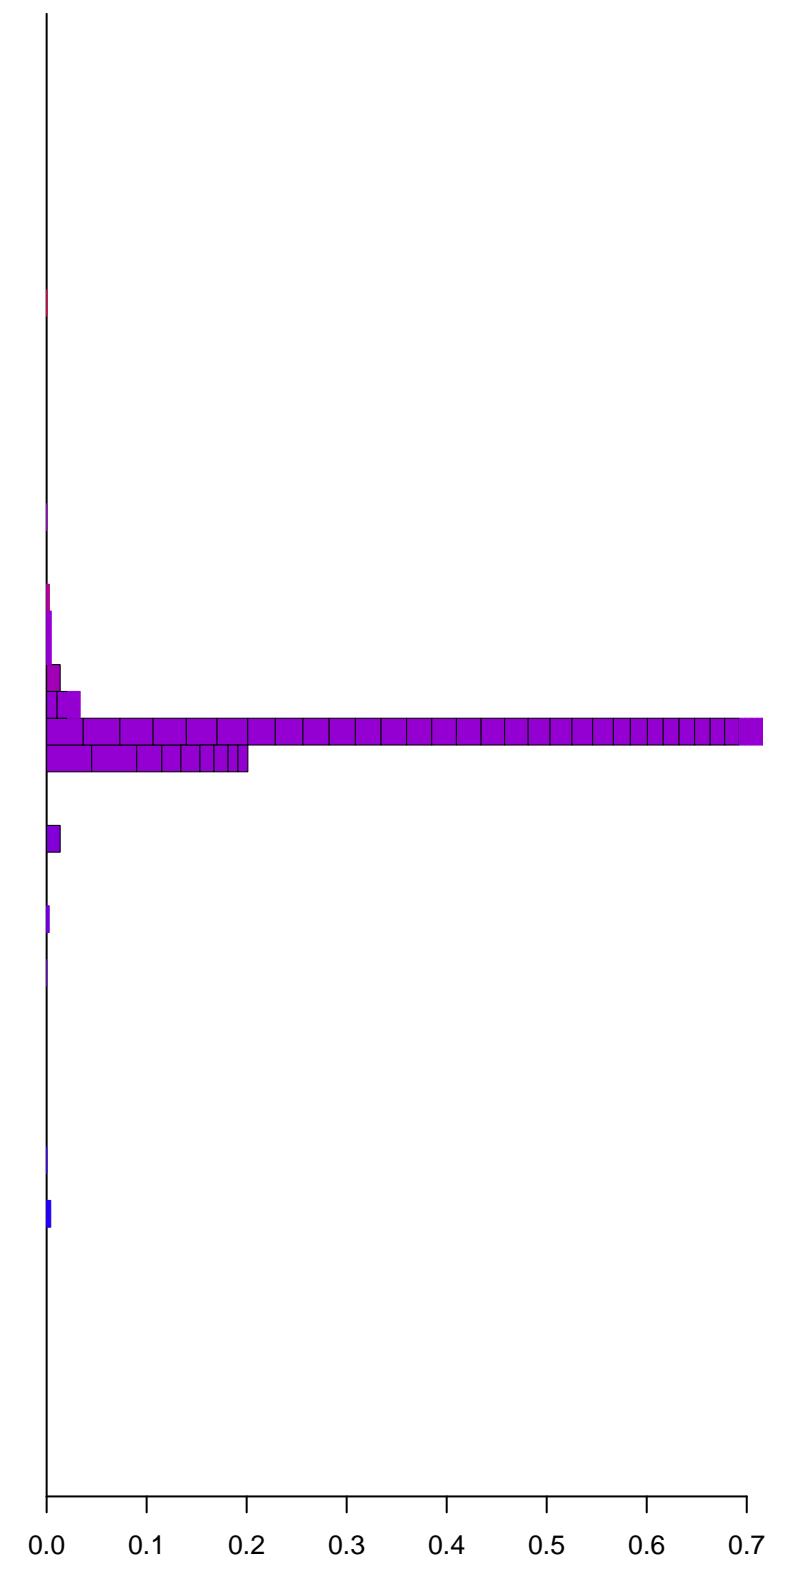

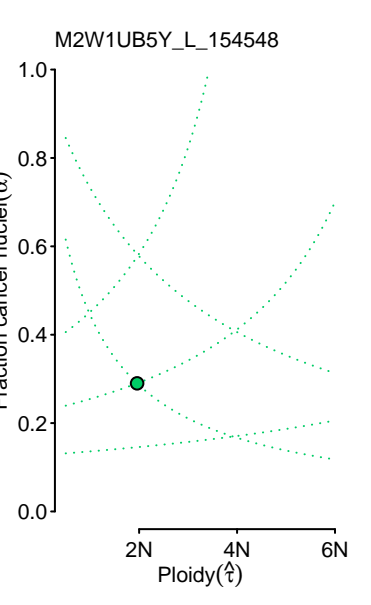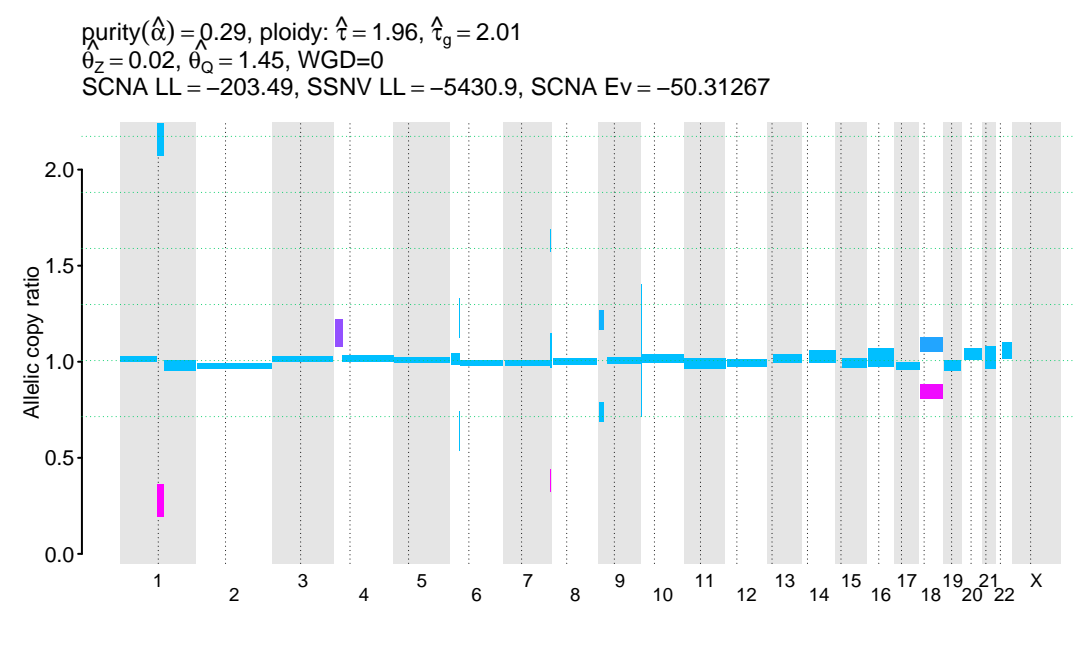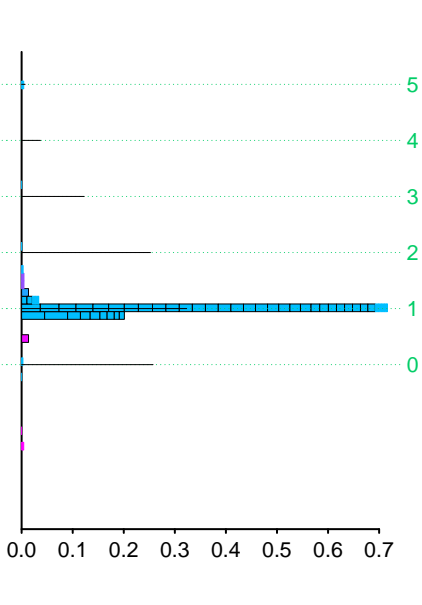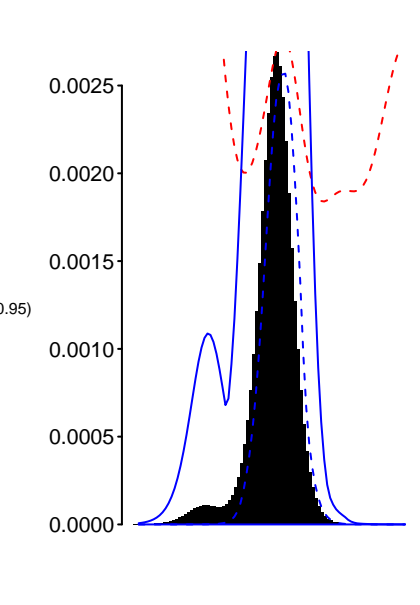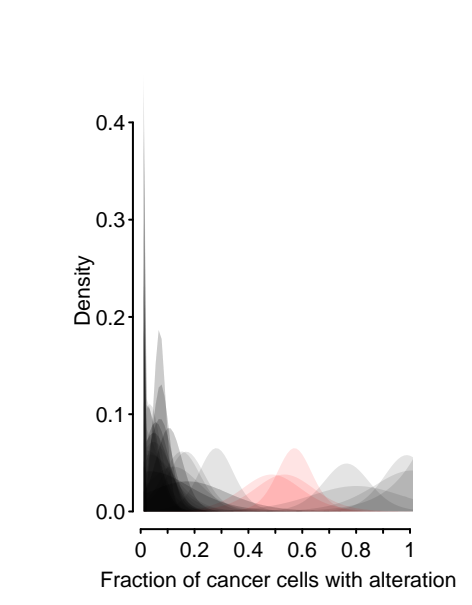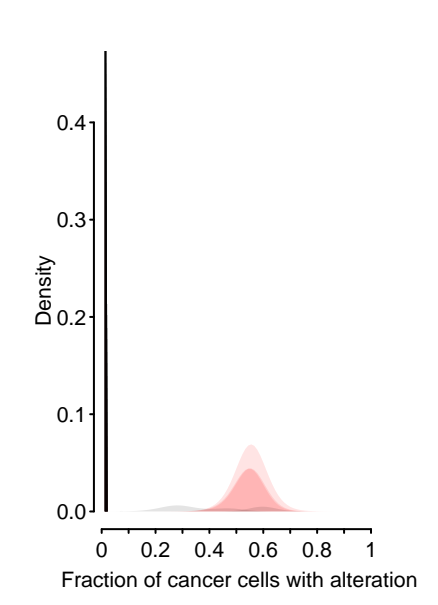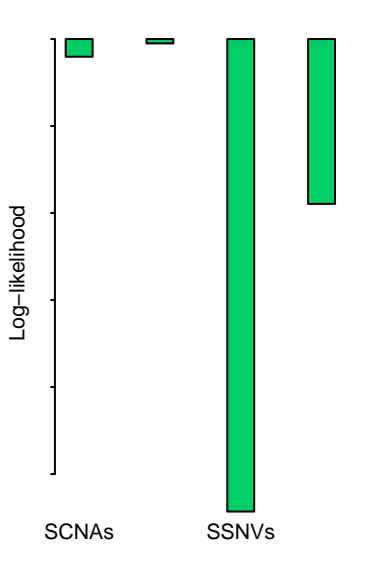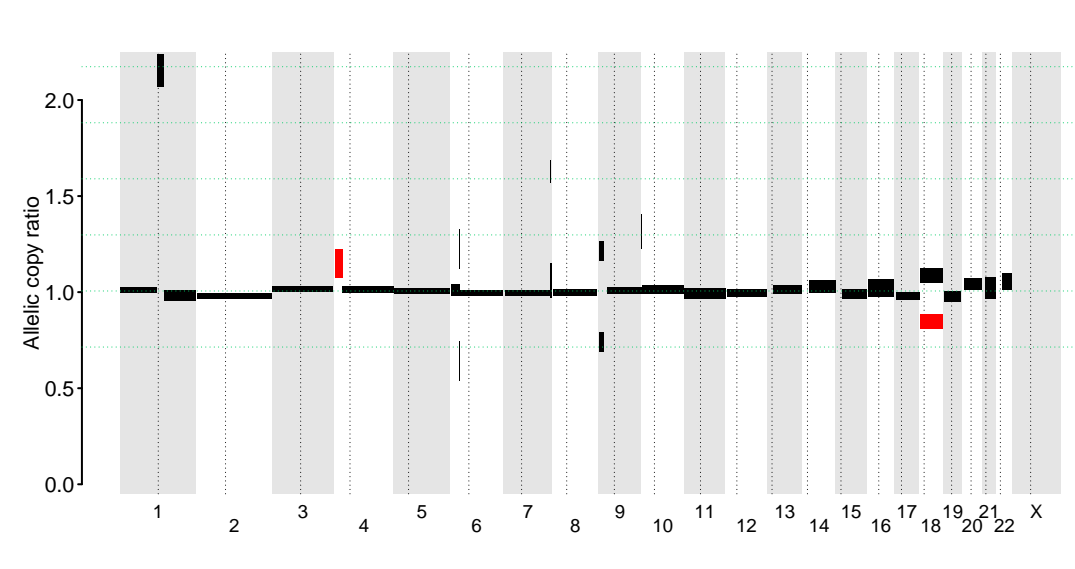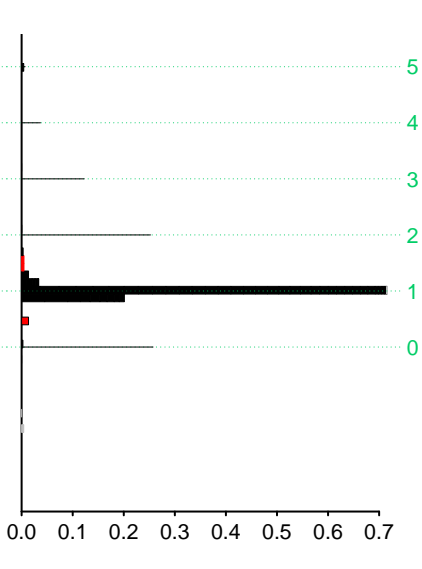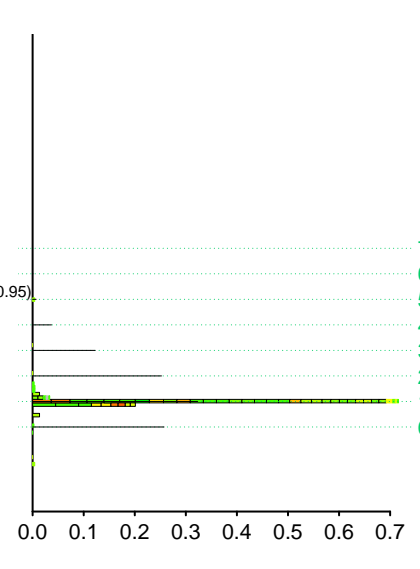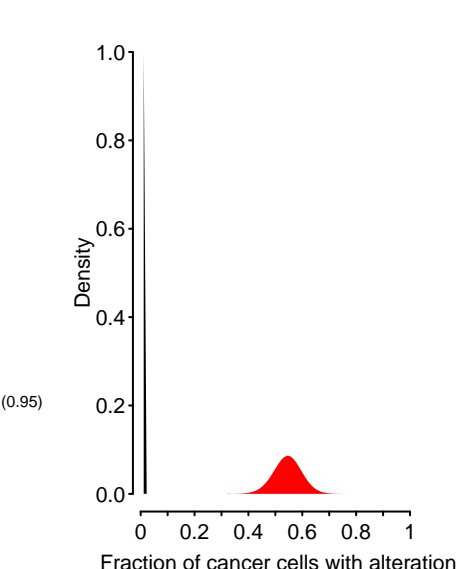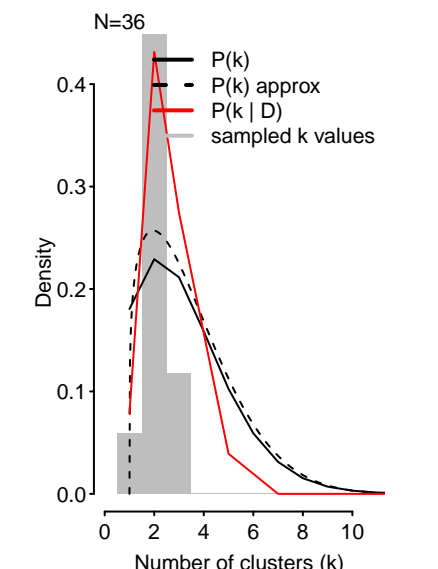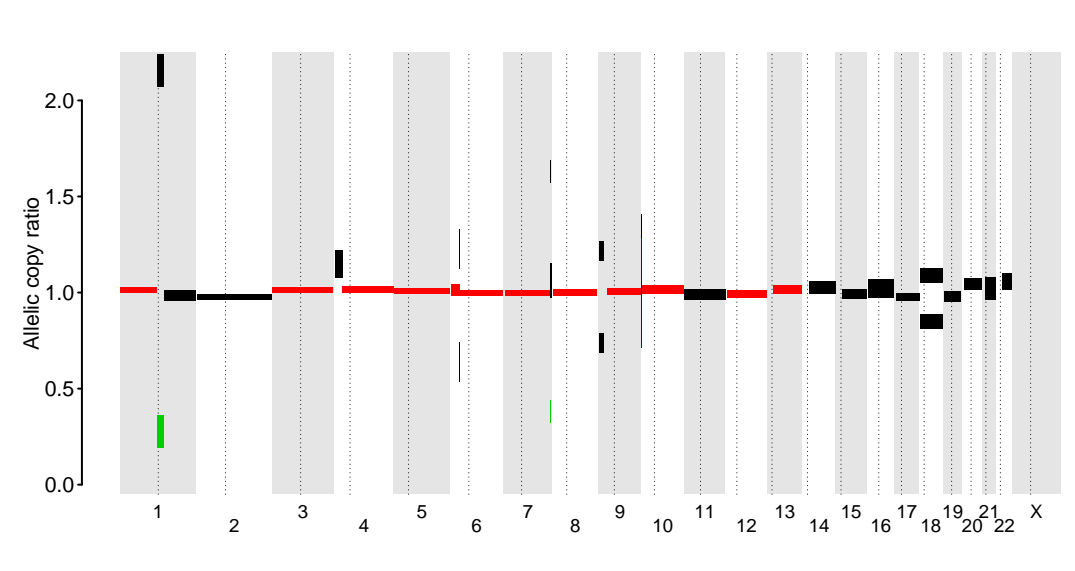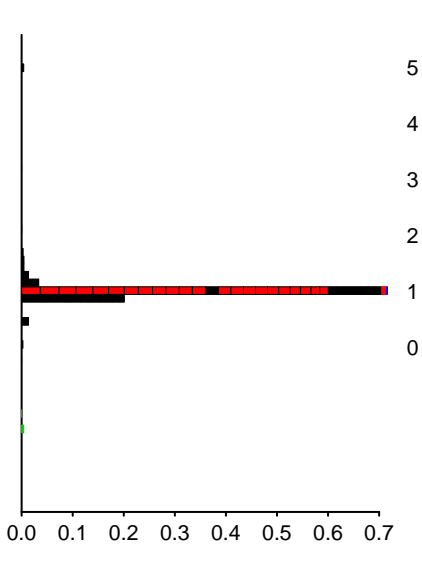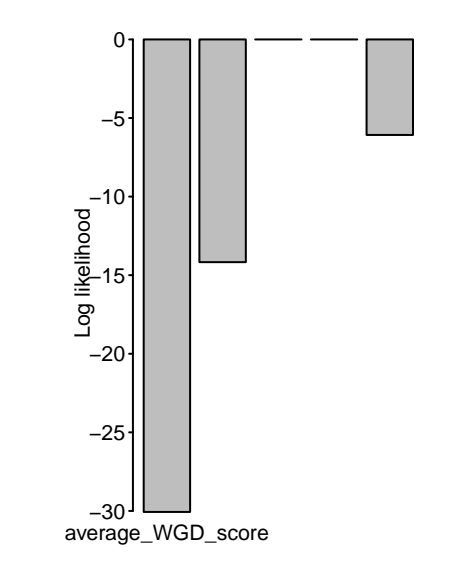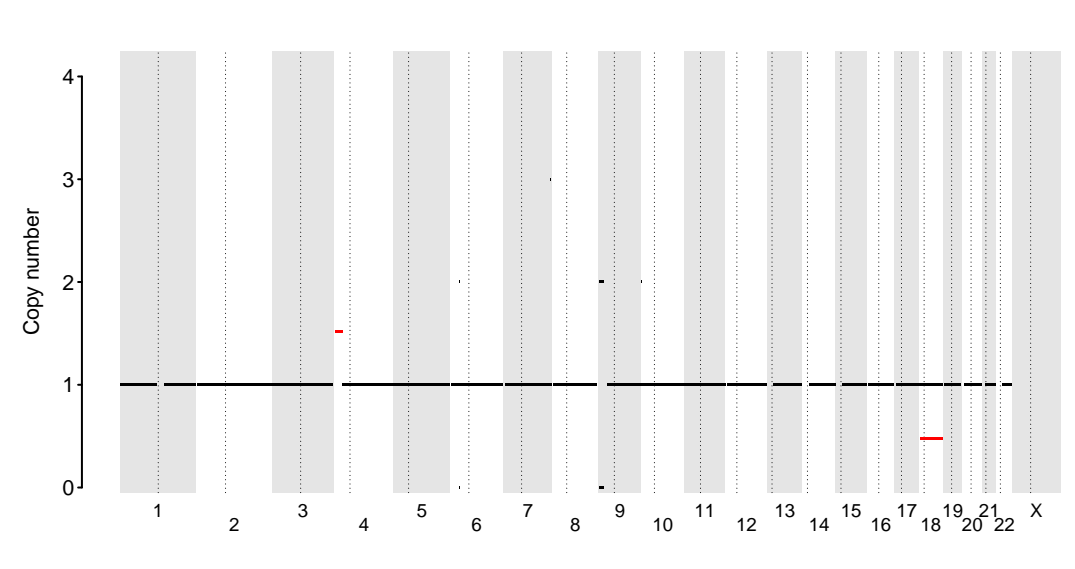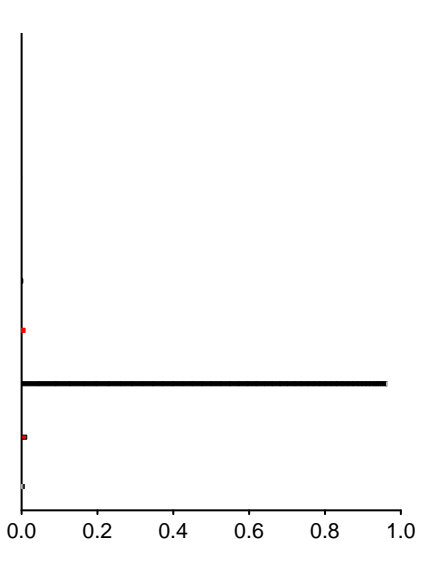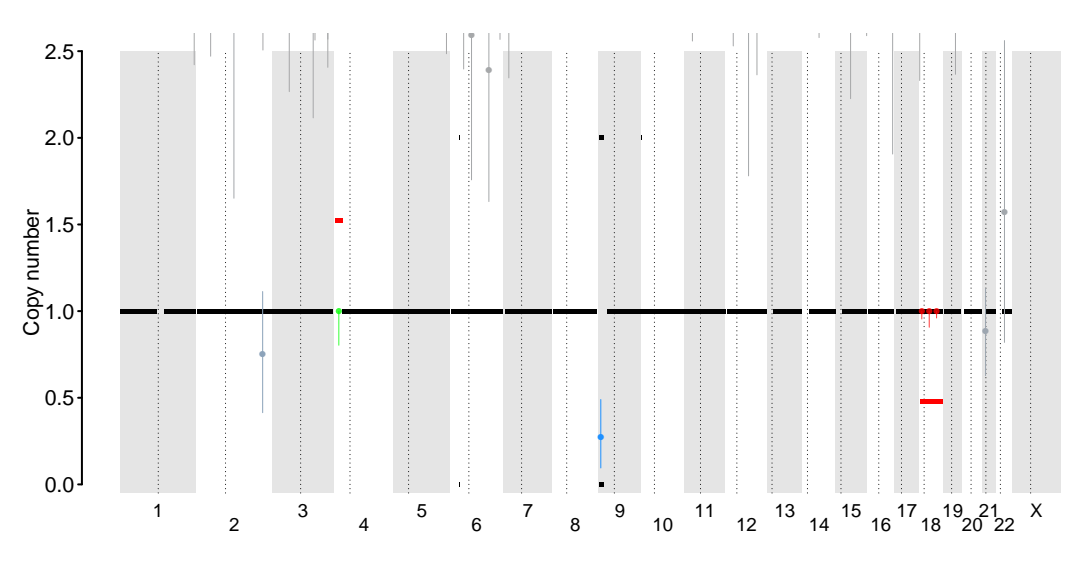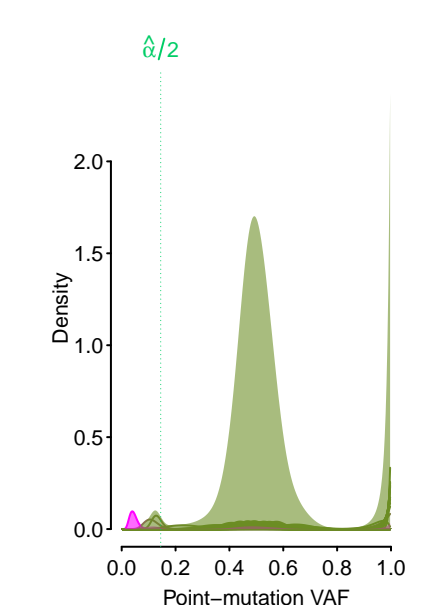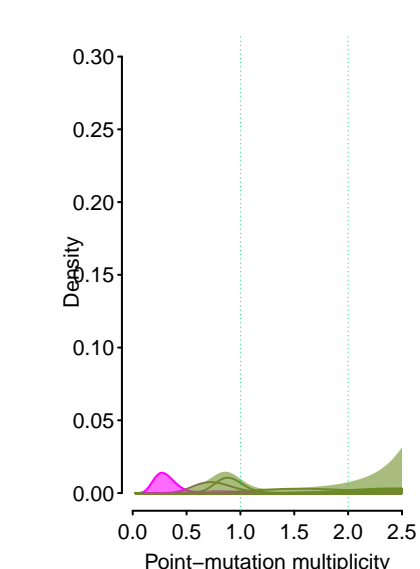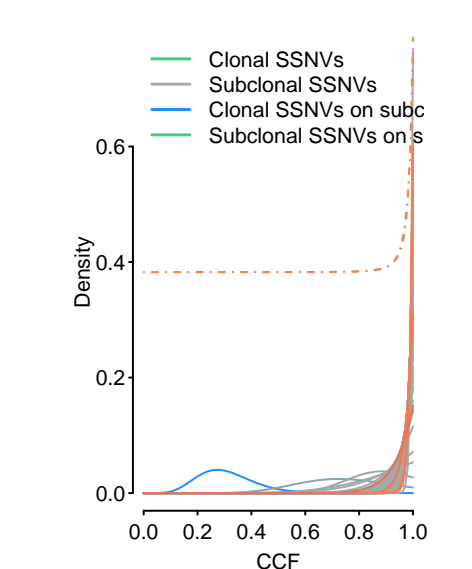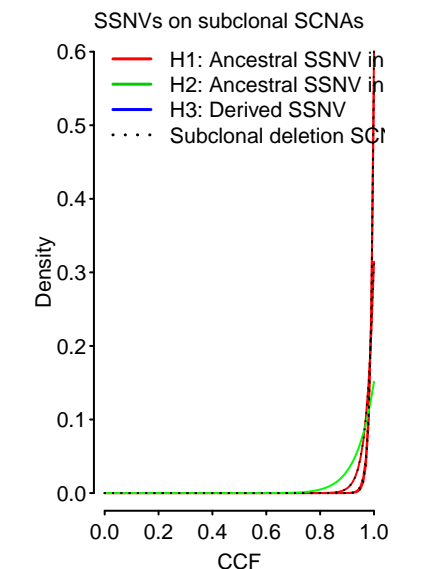

Sample 79

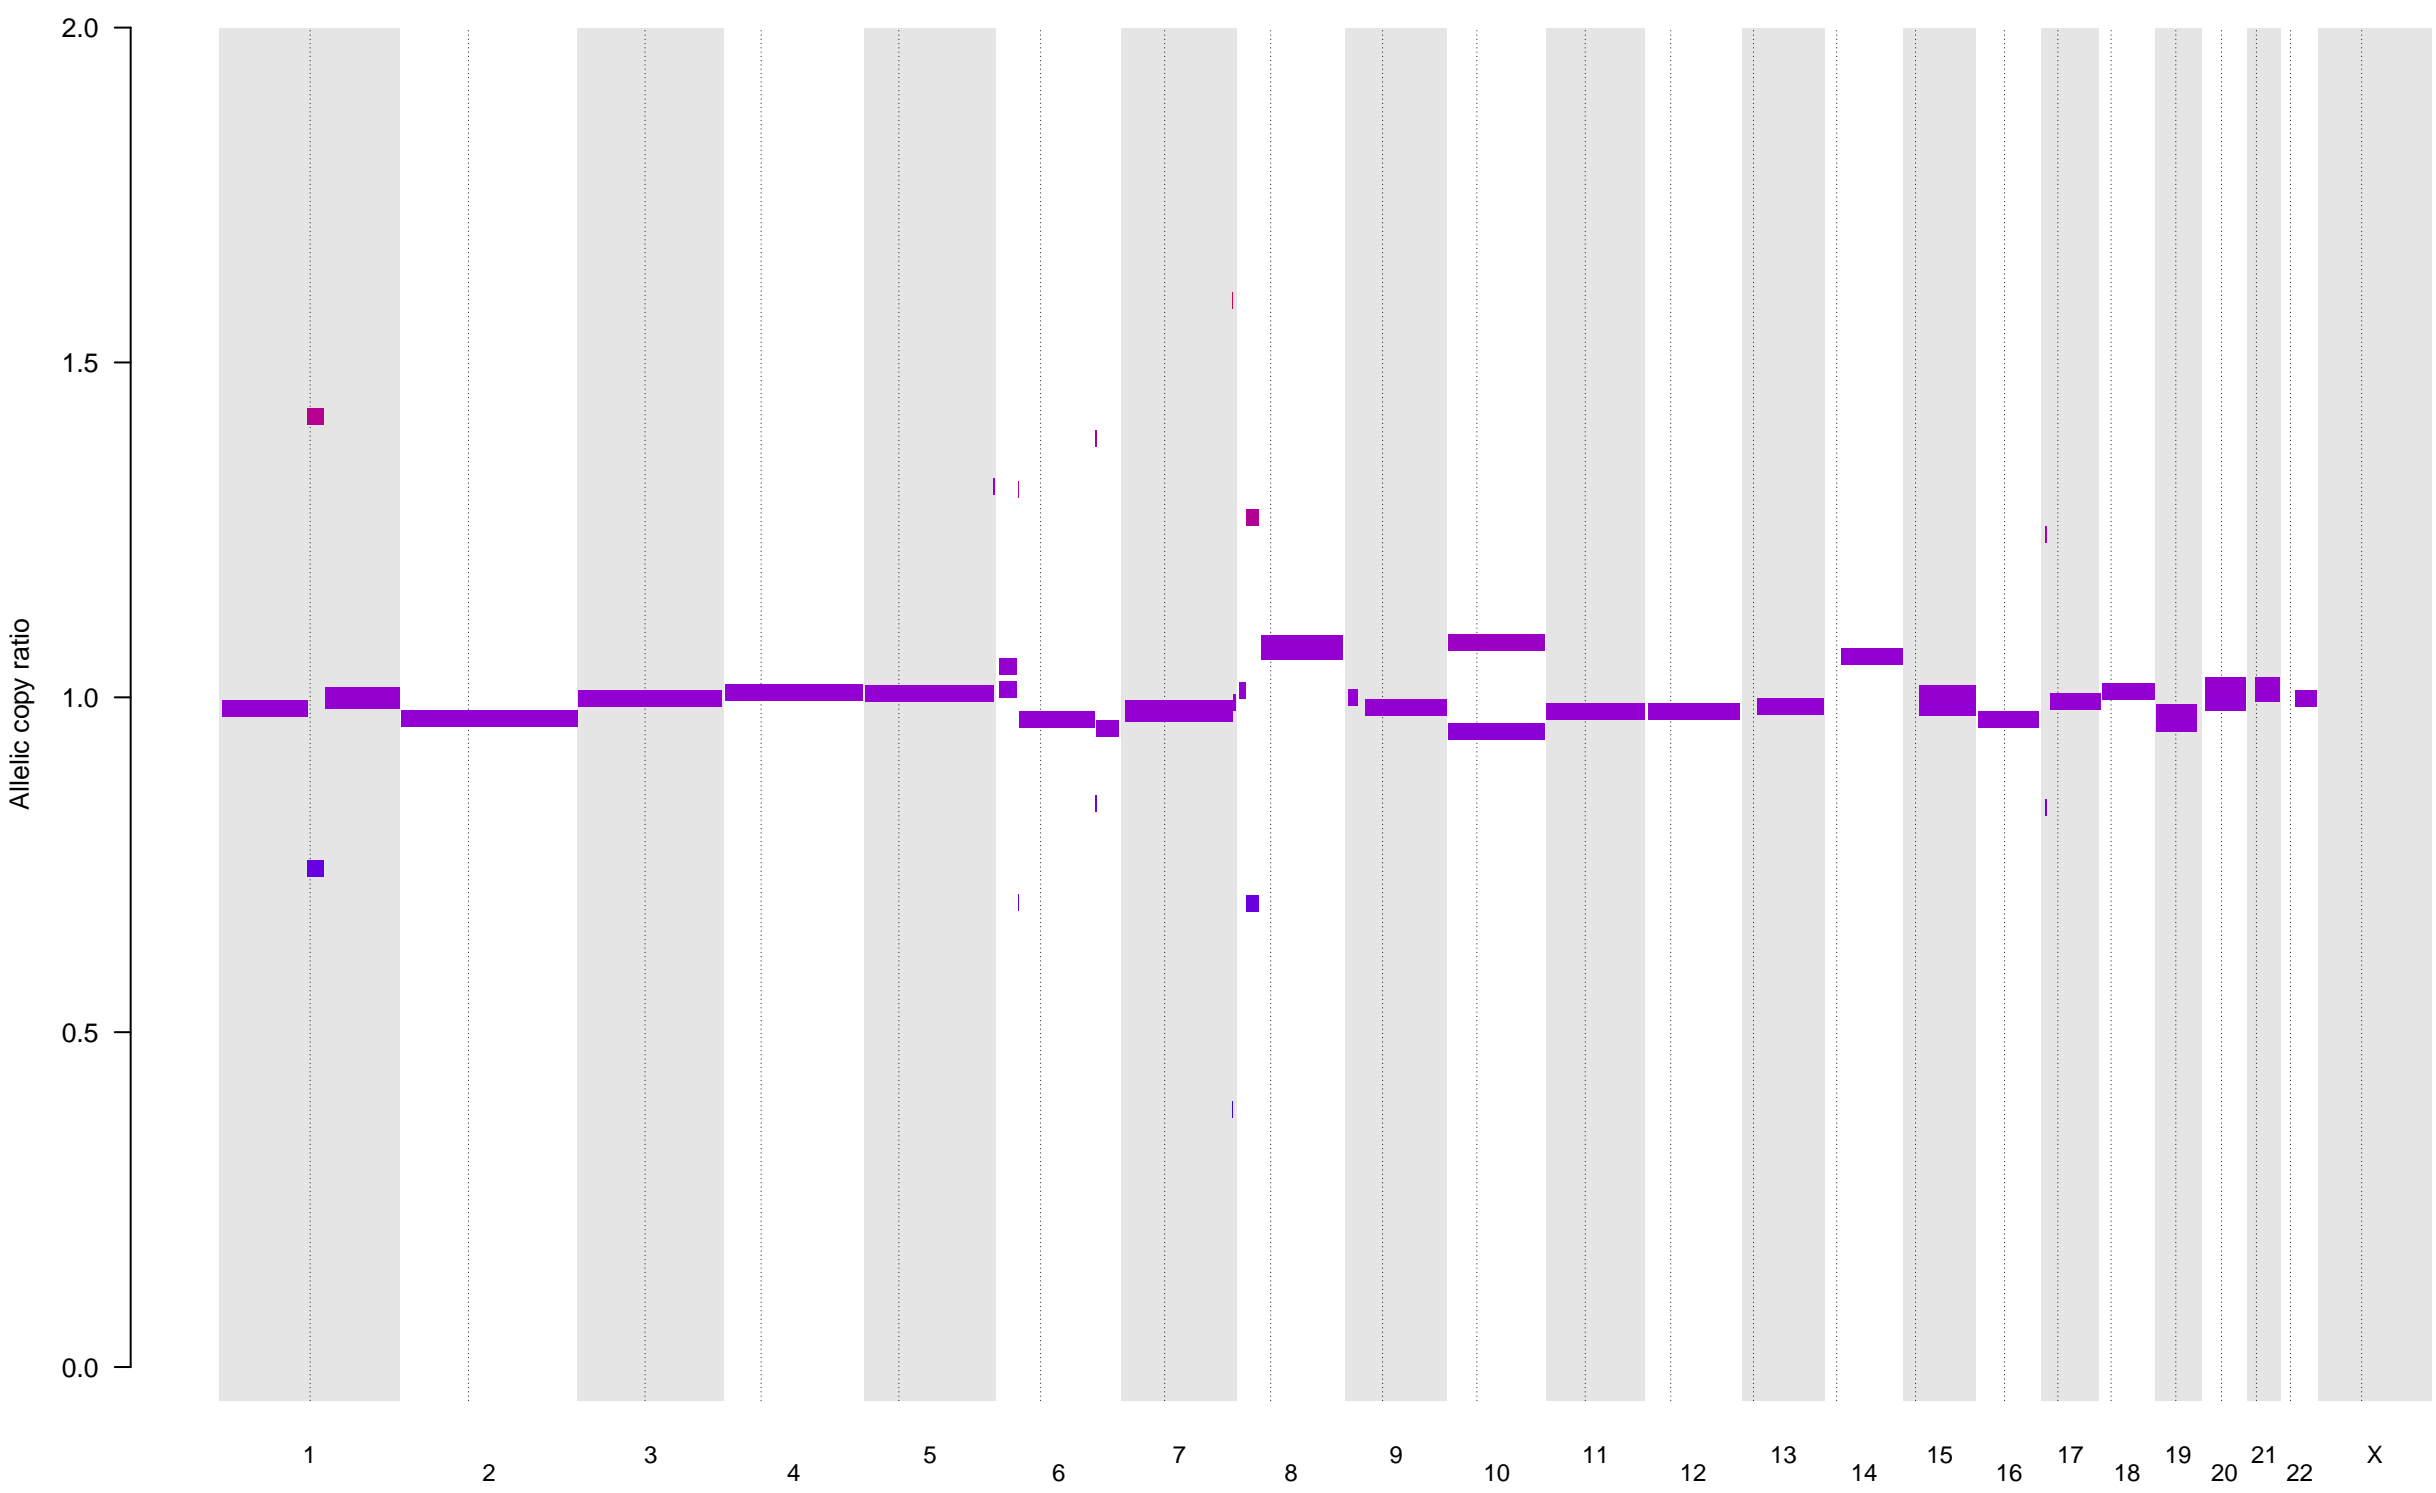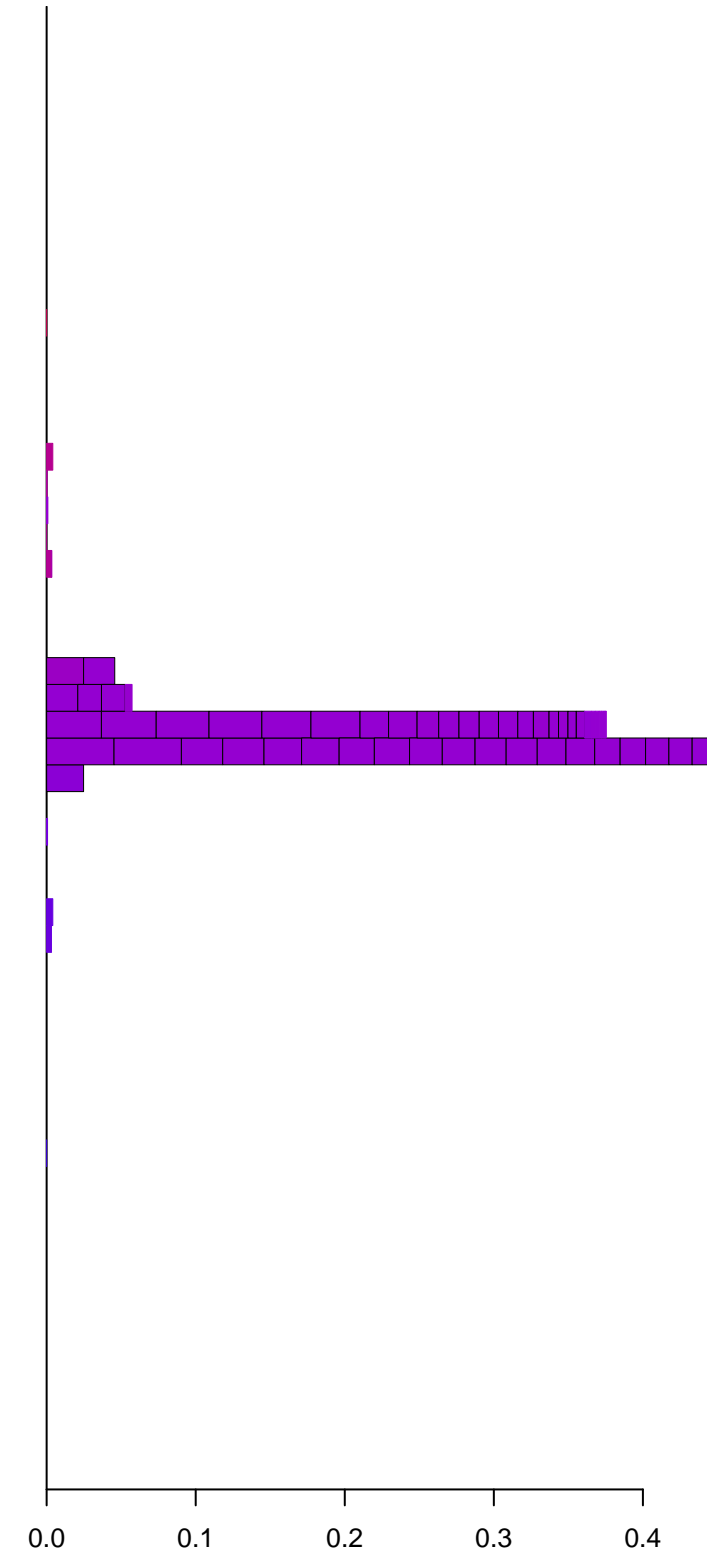



$\hat{\alpha} = 0.27$ , ploidy:  $\hat{\tau} = 2.09$ ,  $\hat{\tau}_g = 2.01$   
 $\theta_z = 0.06$ ,  $\theta_G = 1.375$ , WGD=0  
 SCNA LL = -223.74, SSNV LL = -3626.93, SCNA Ev = -51.77404

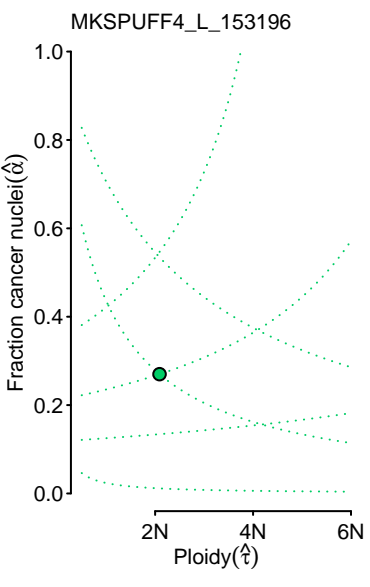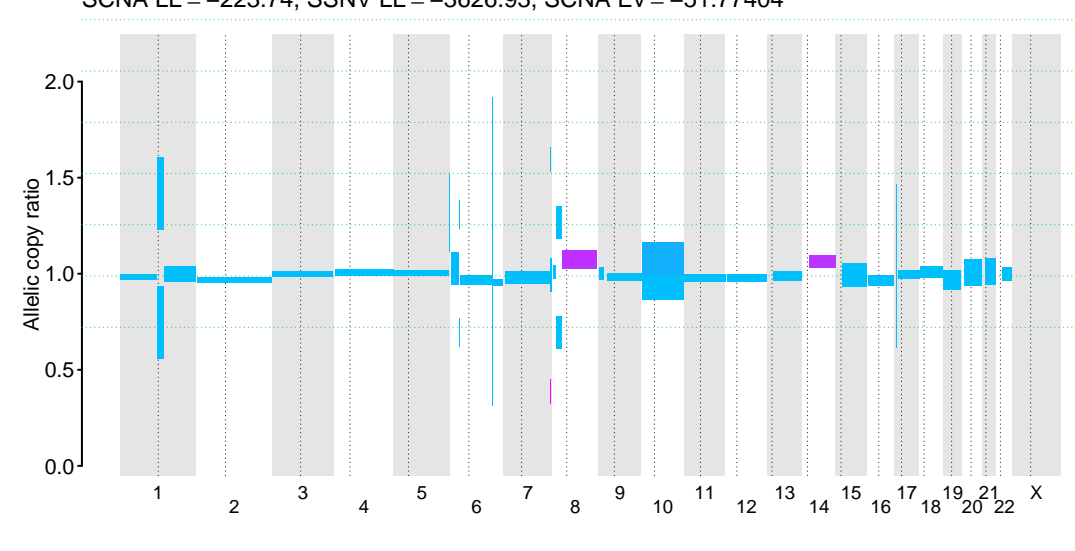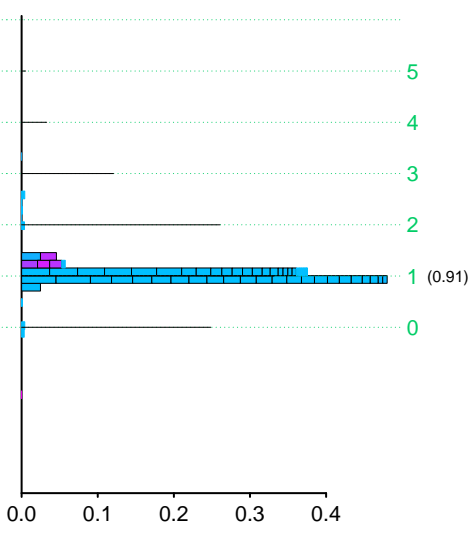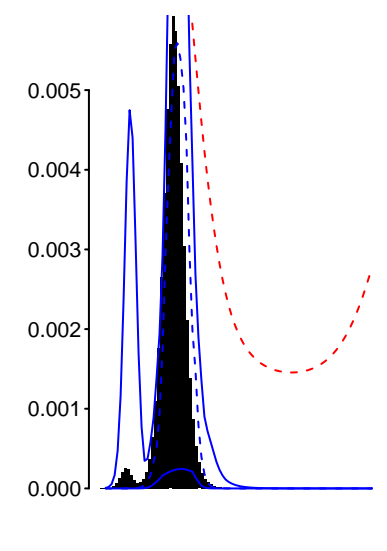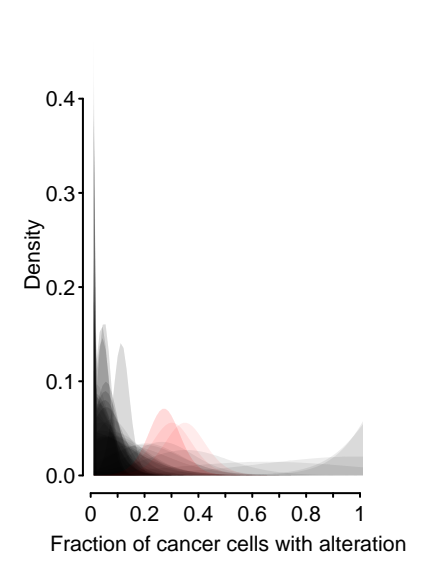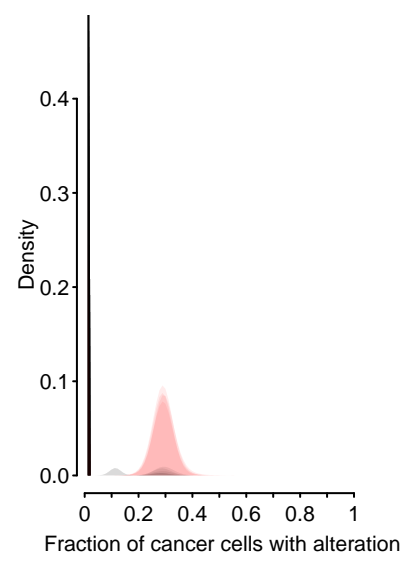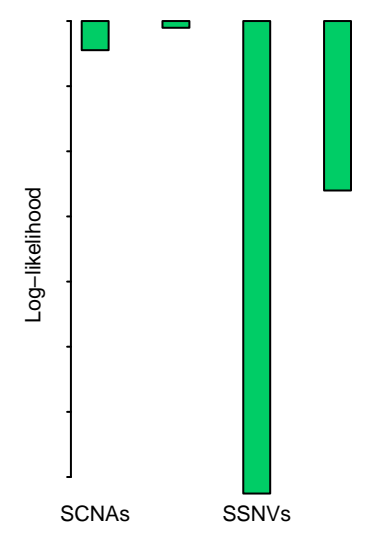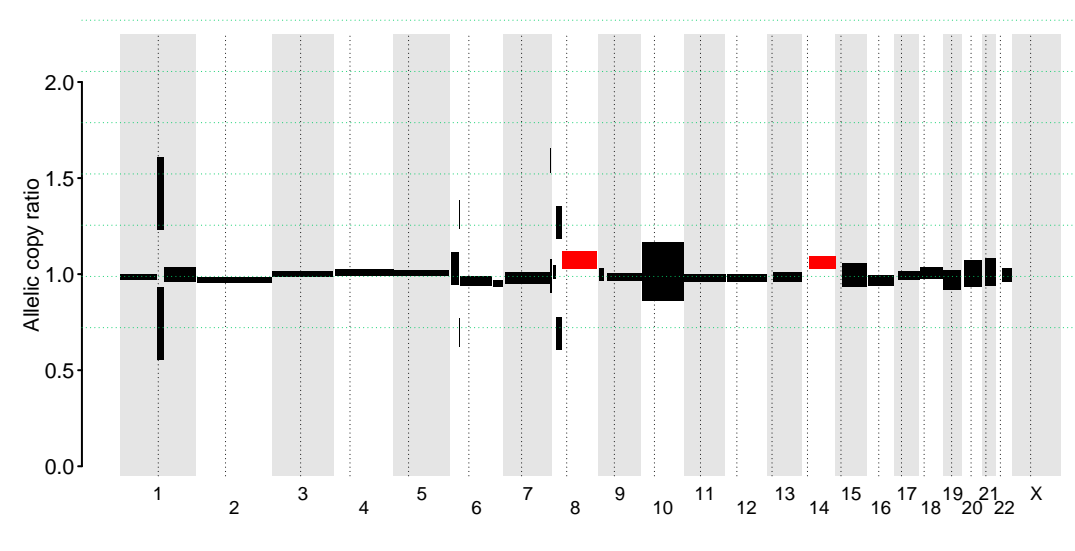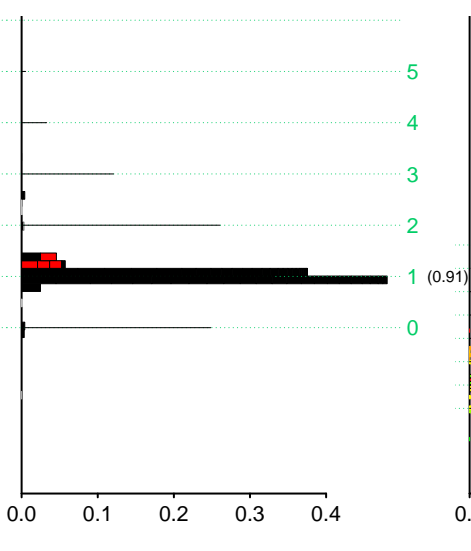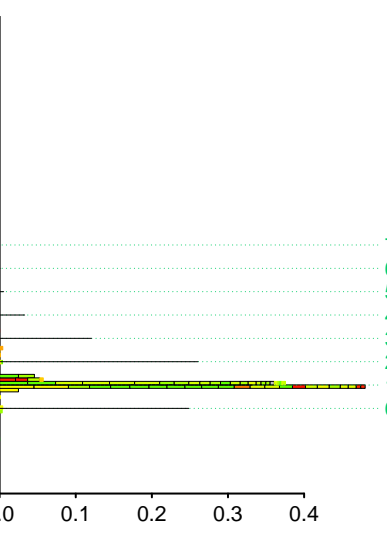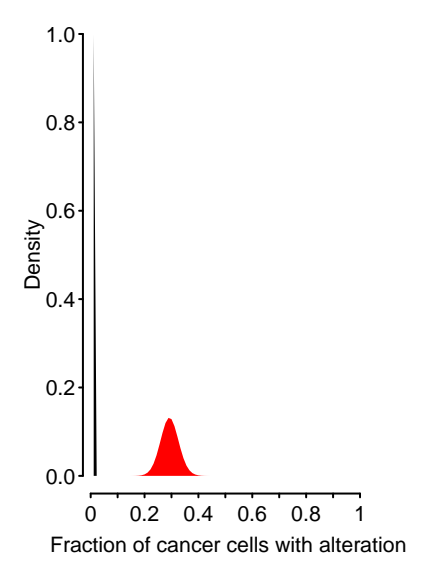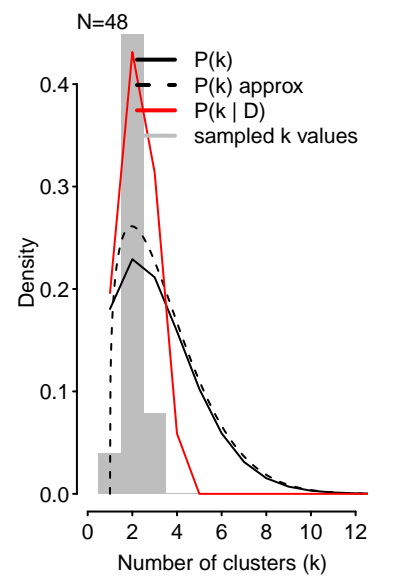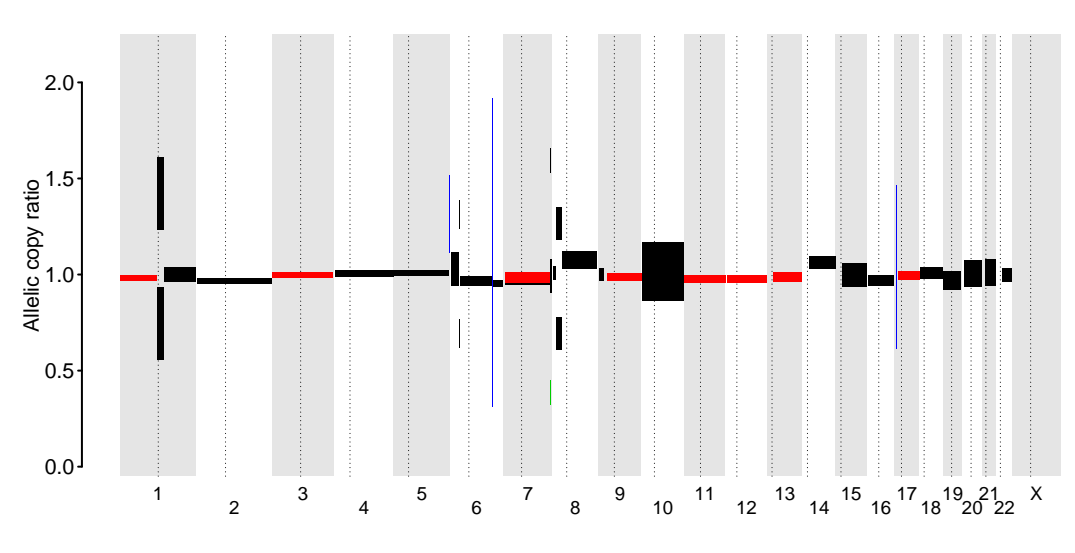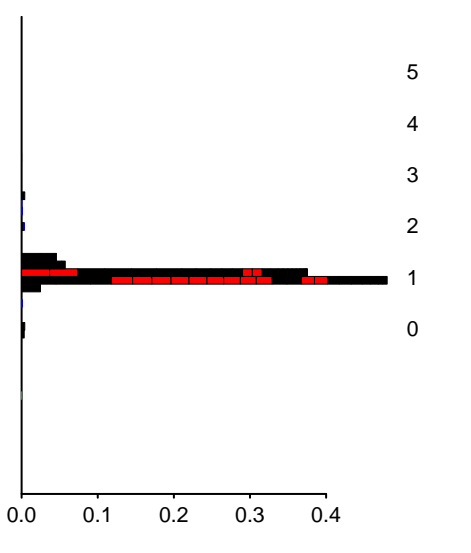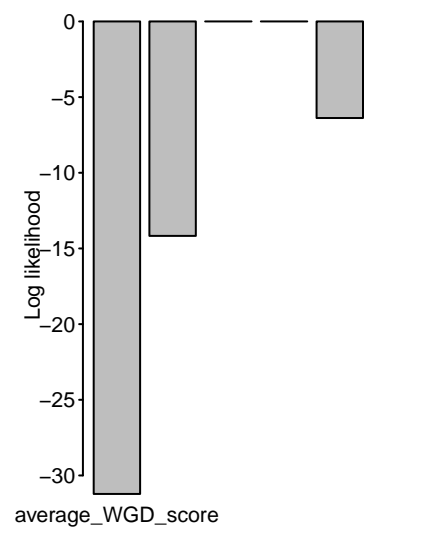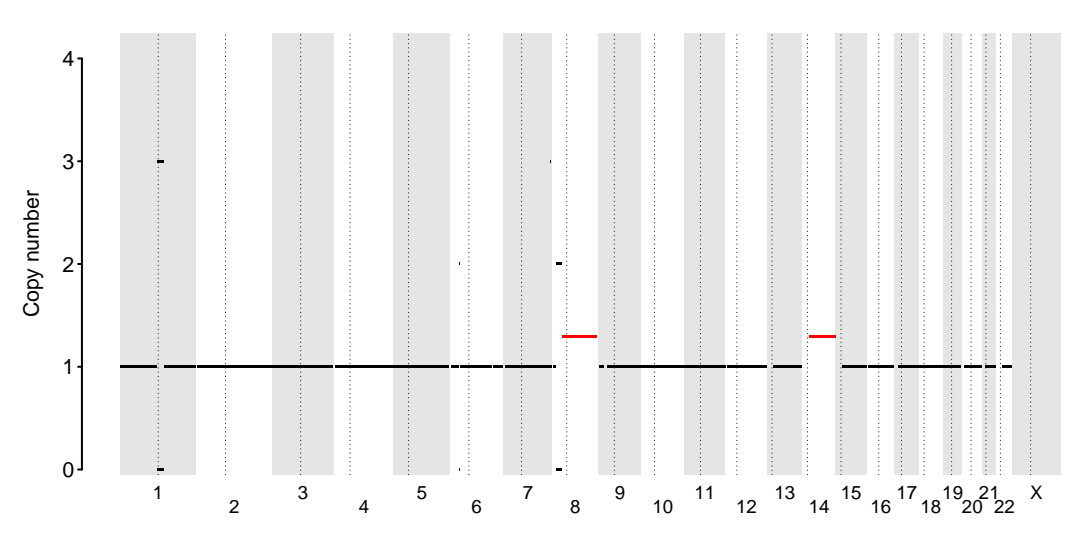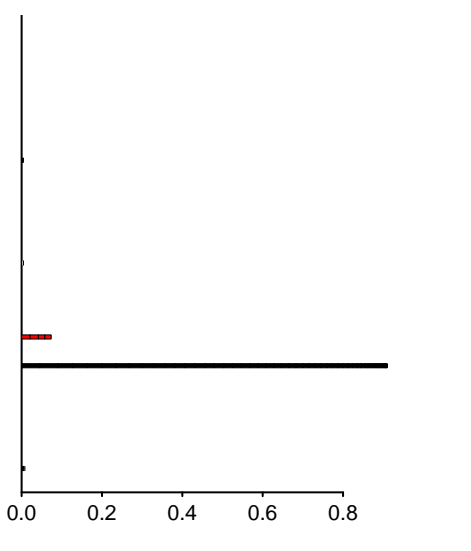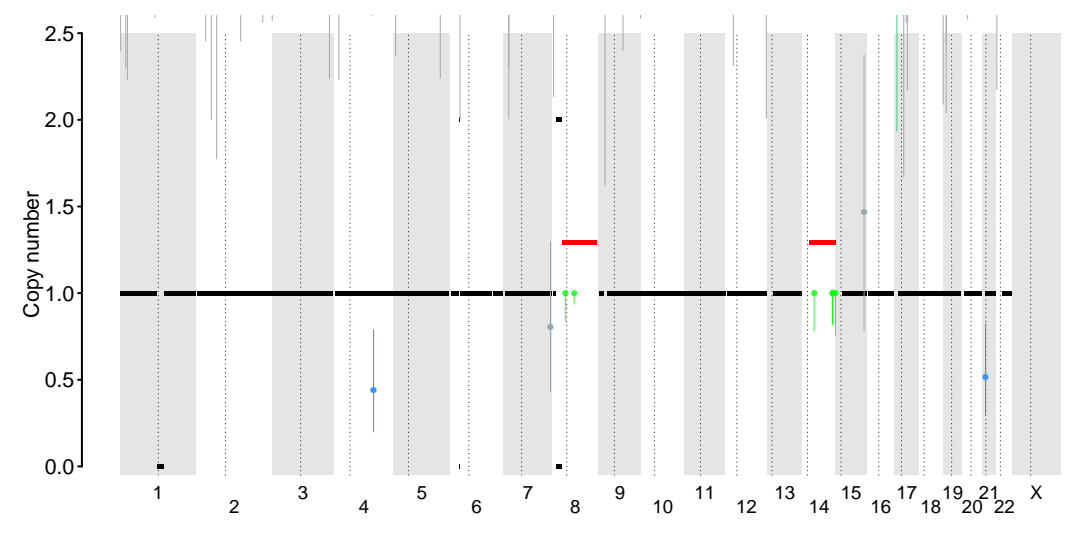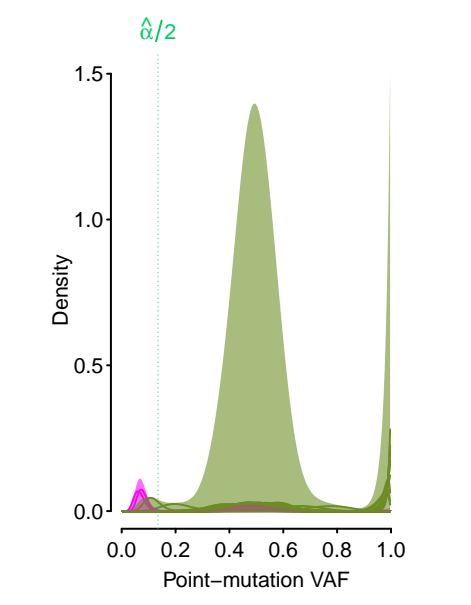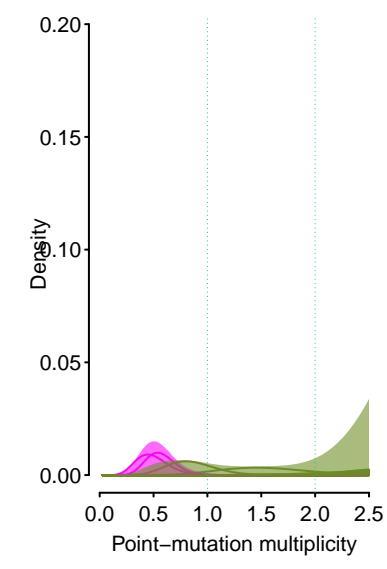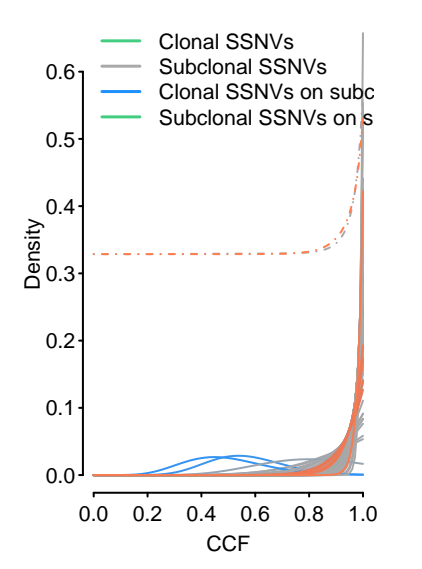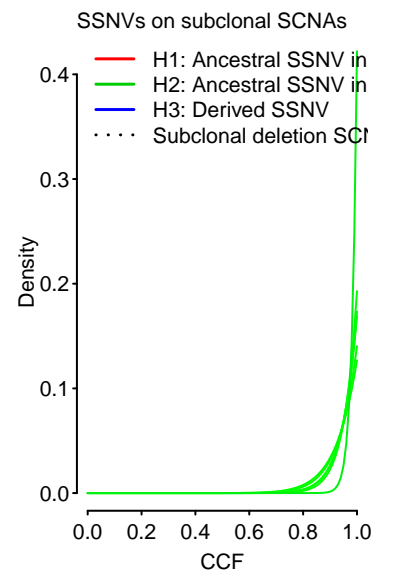



Sample 81

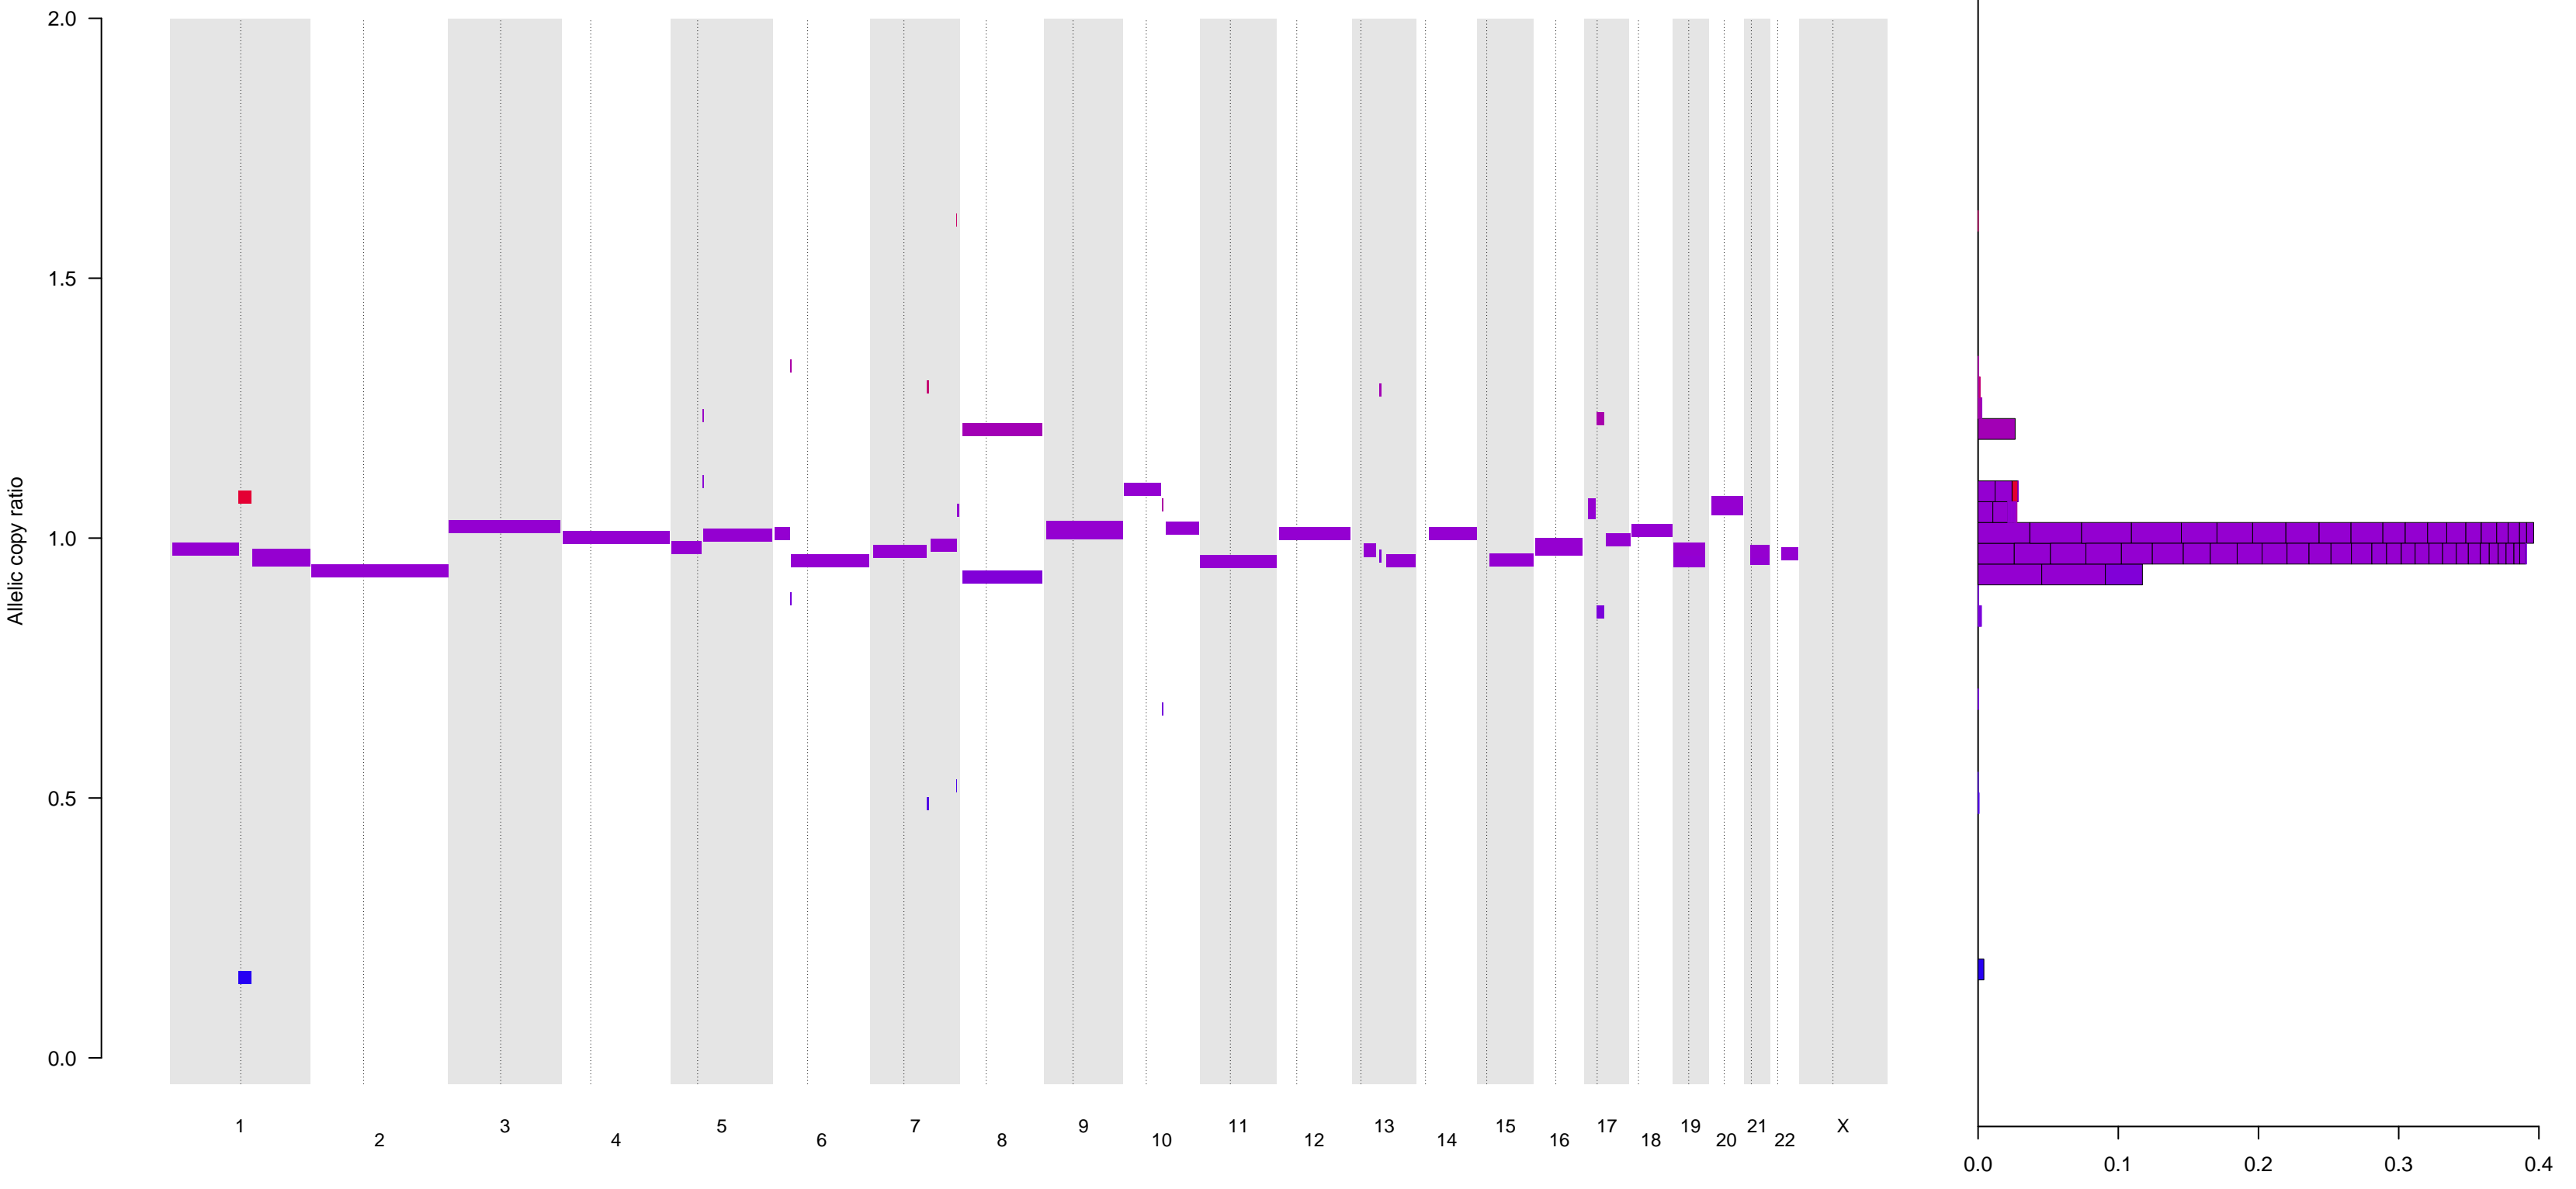

$\hat{\alpha} = 0.22$ , purity:  $\hat{\alpha} = 2.08$ ,  $\hat{\alpha}_g = 2.07$   
 $\theta_z = 0.18$ ,  $\theta_Q = 1.348$ , WGD=0  
 SCNA LL = -304.98, SSNV LL = -5267.07, SCNA Ev = -66.2713

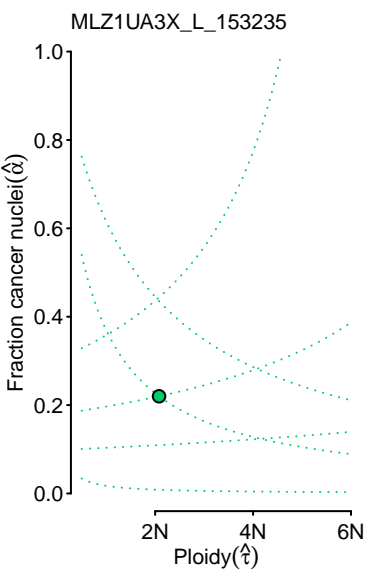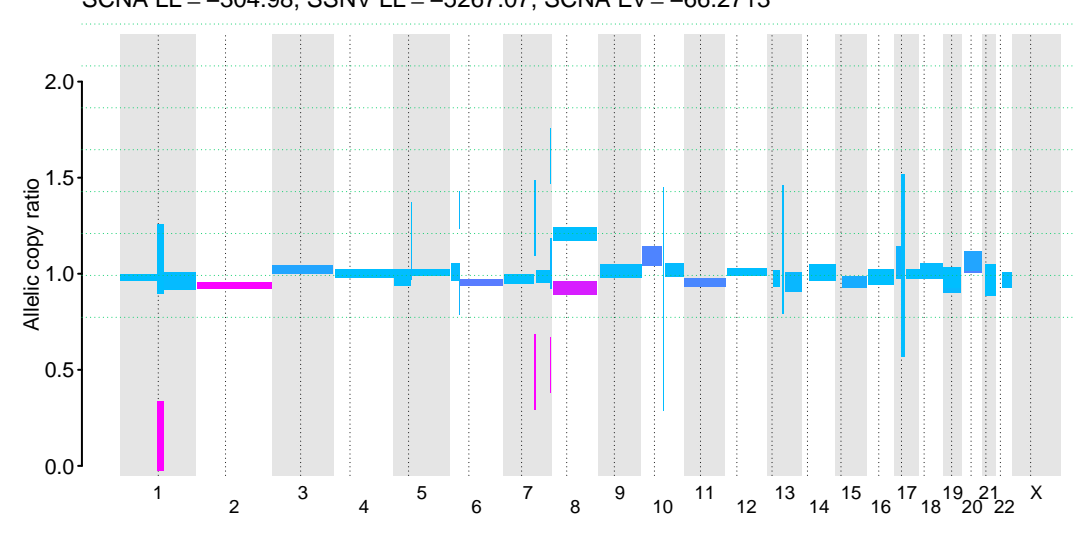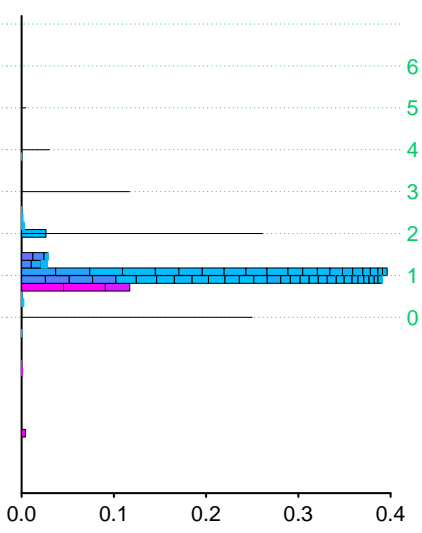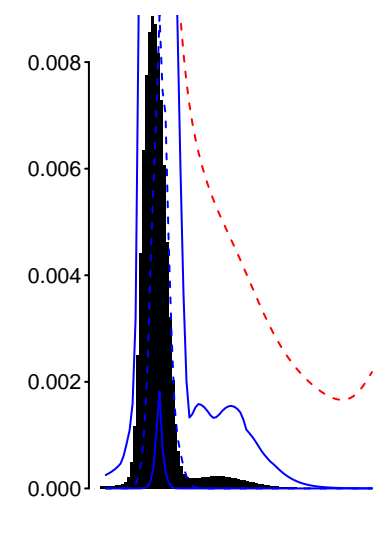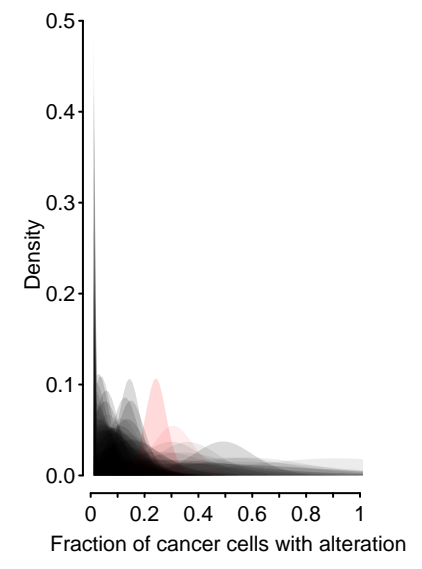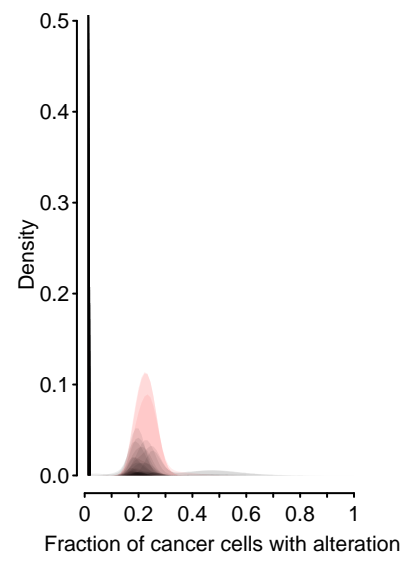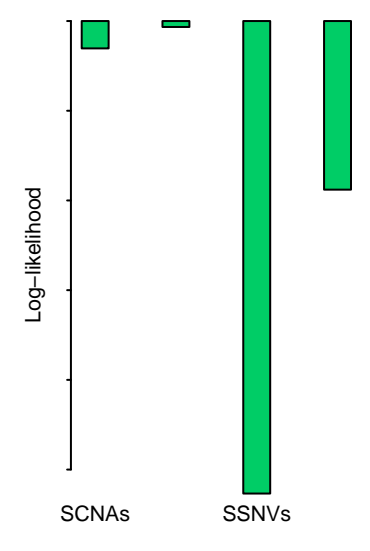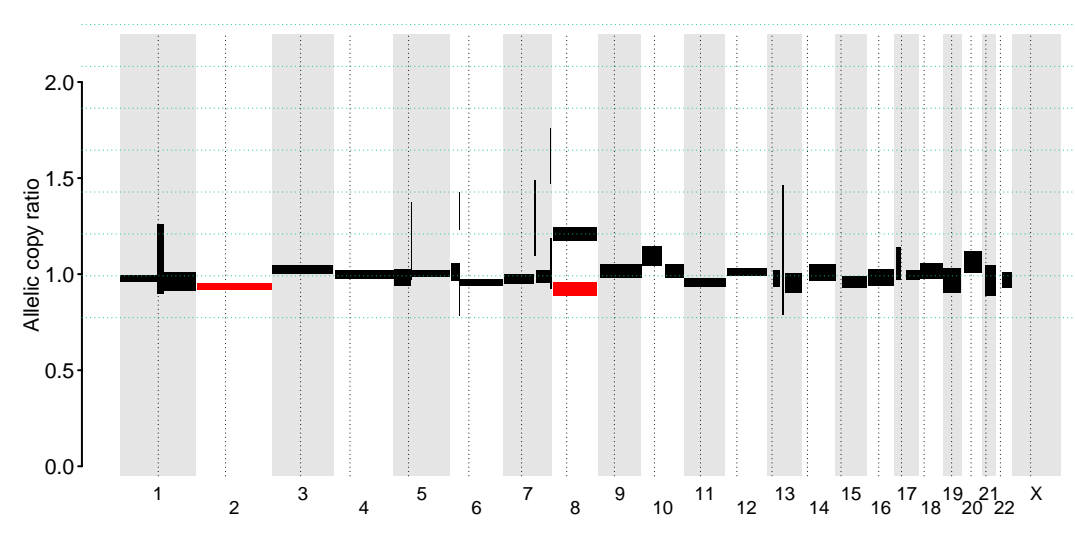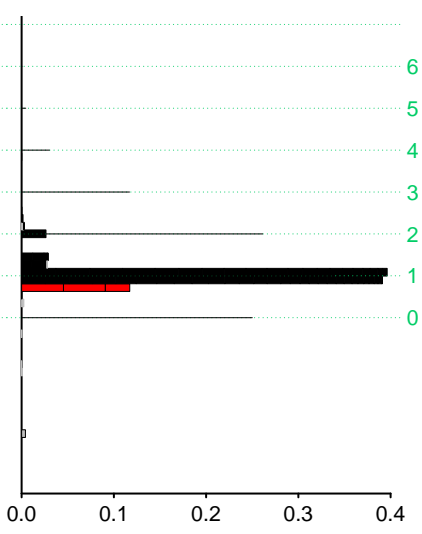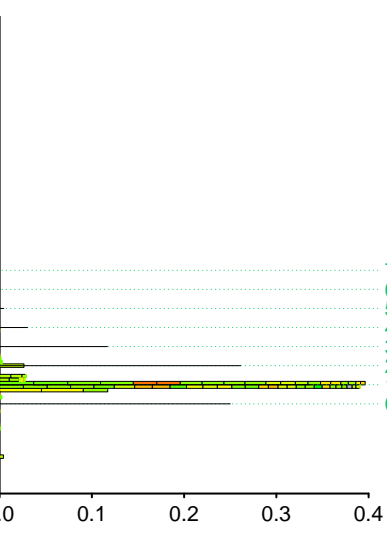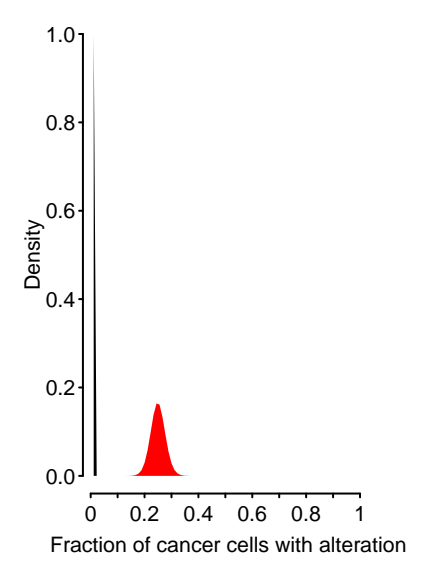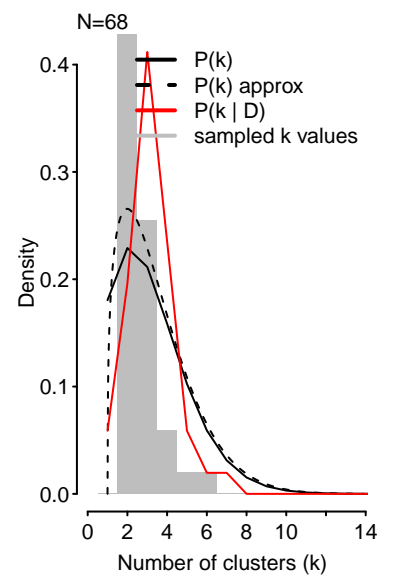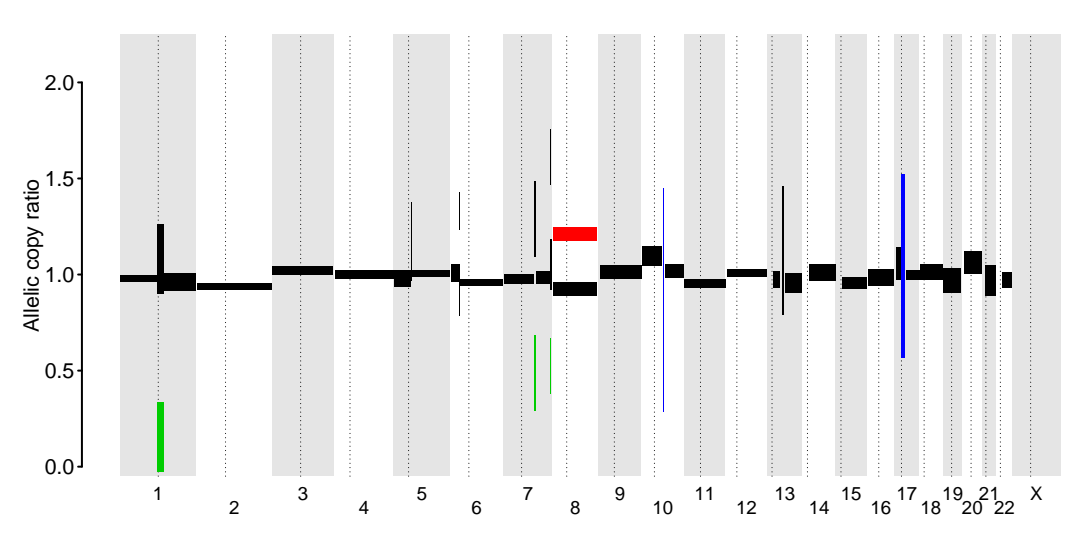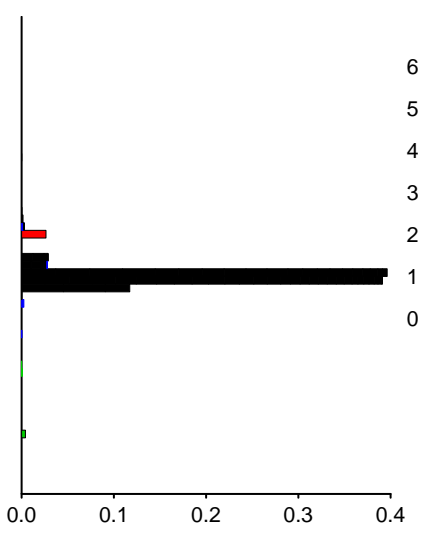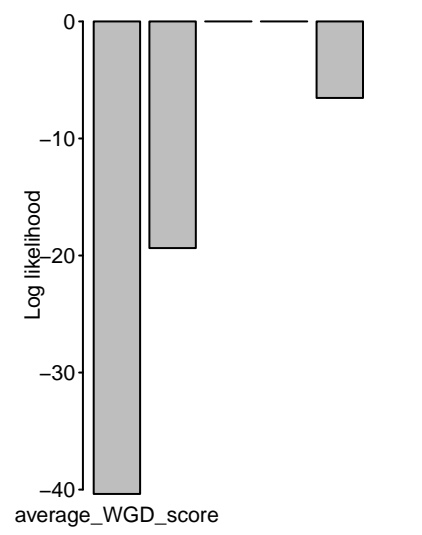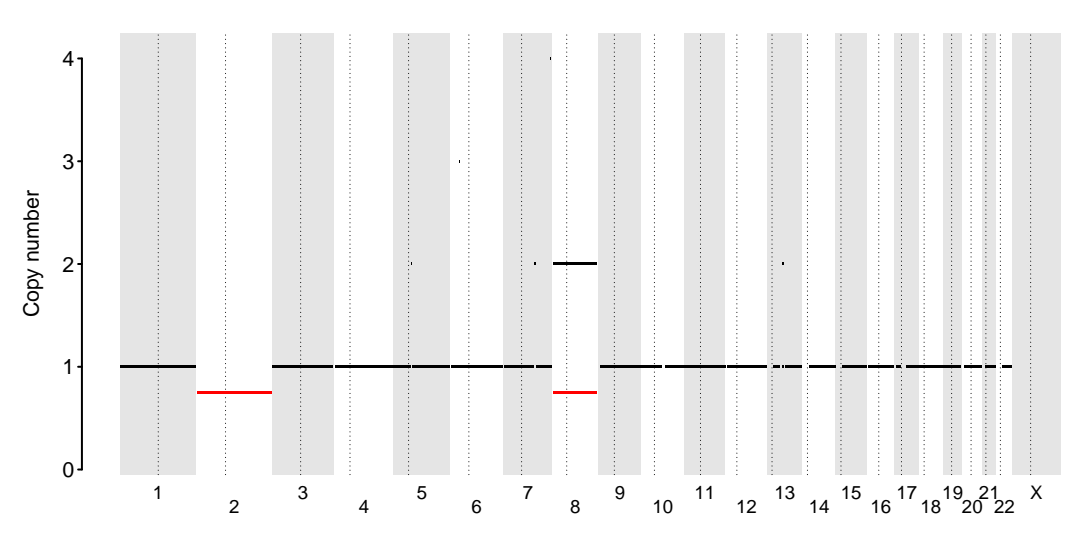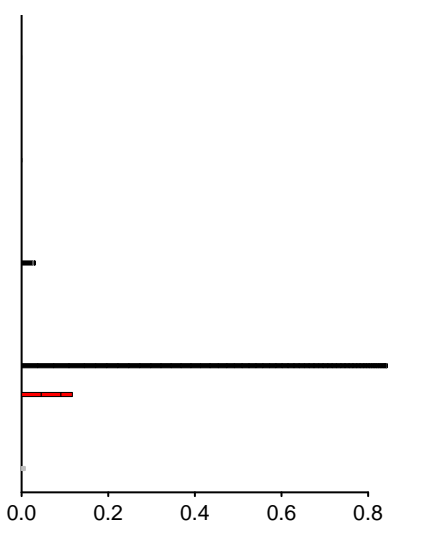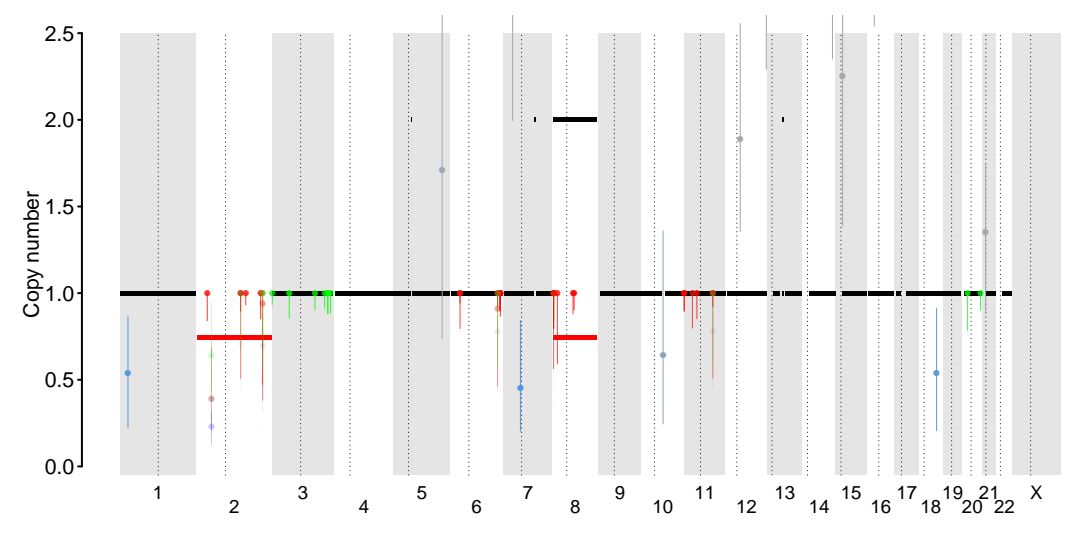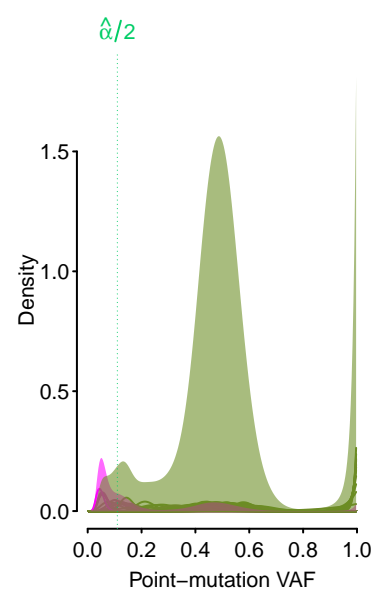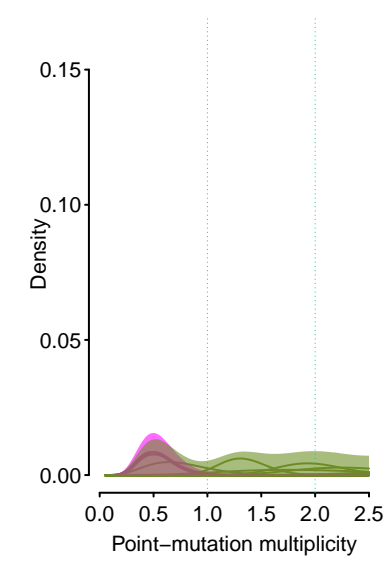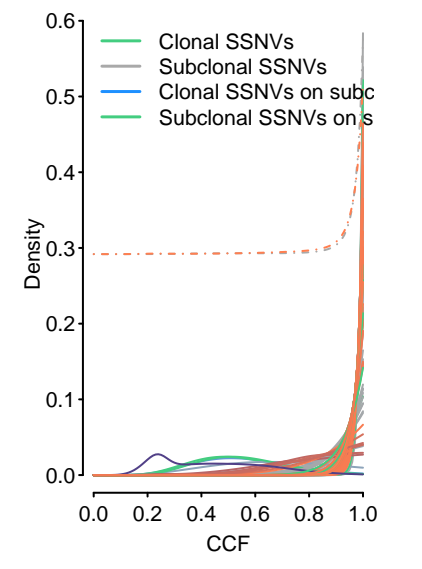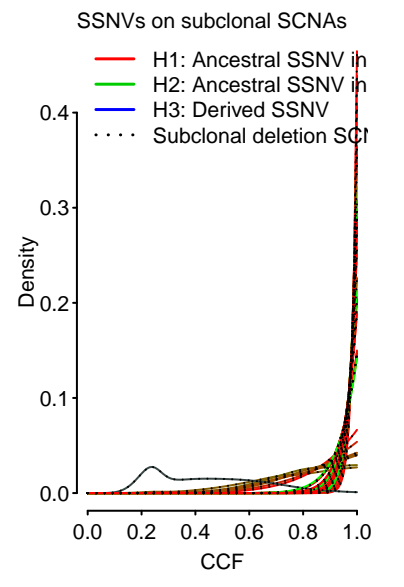

Sample 82

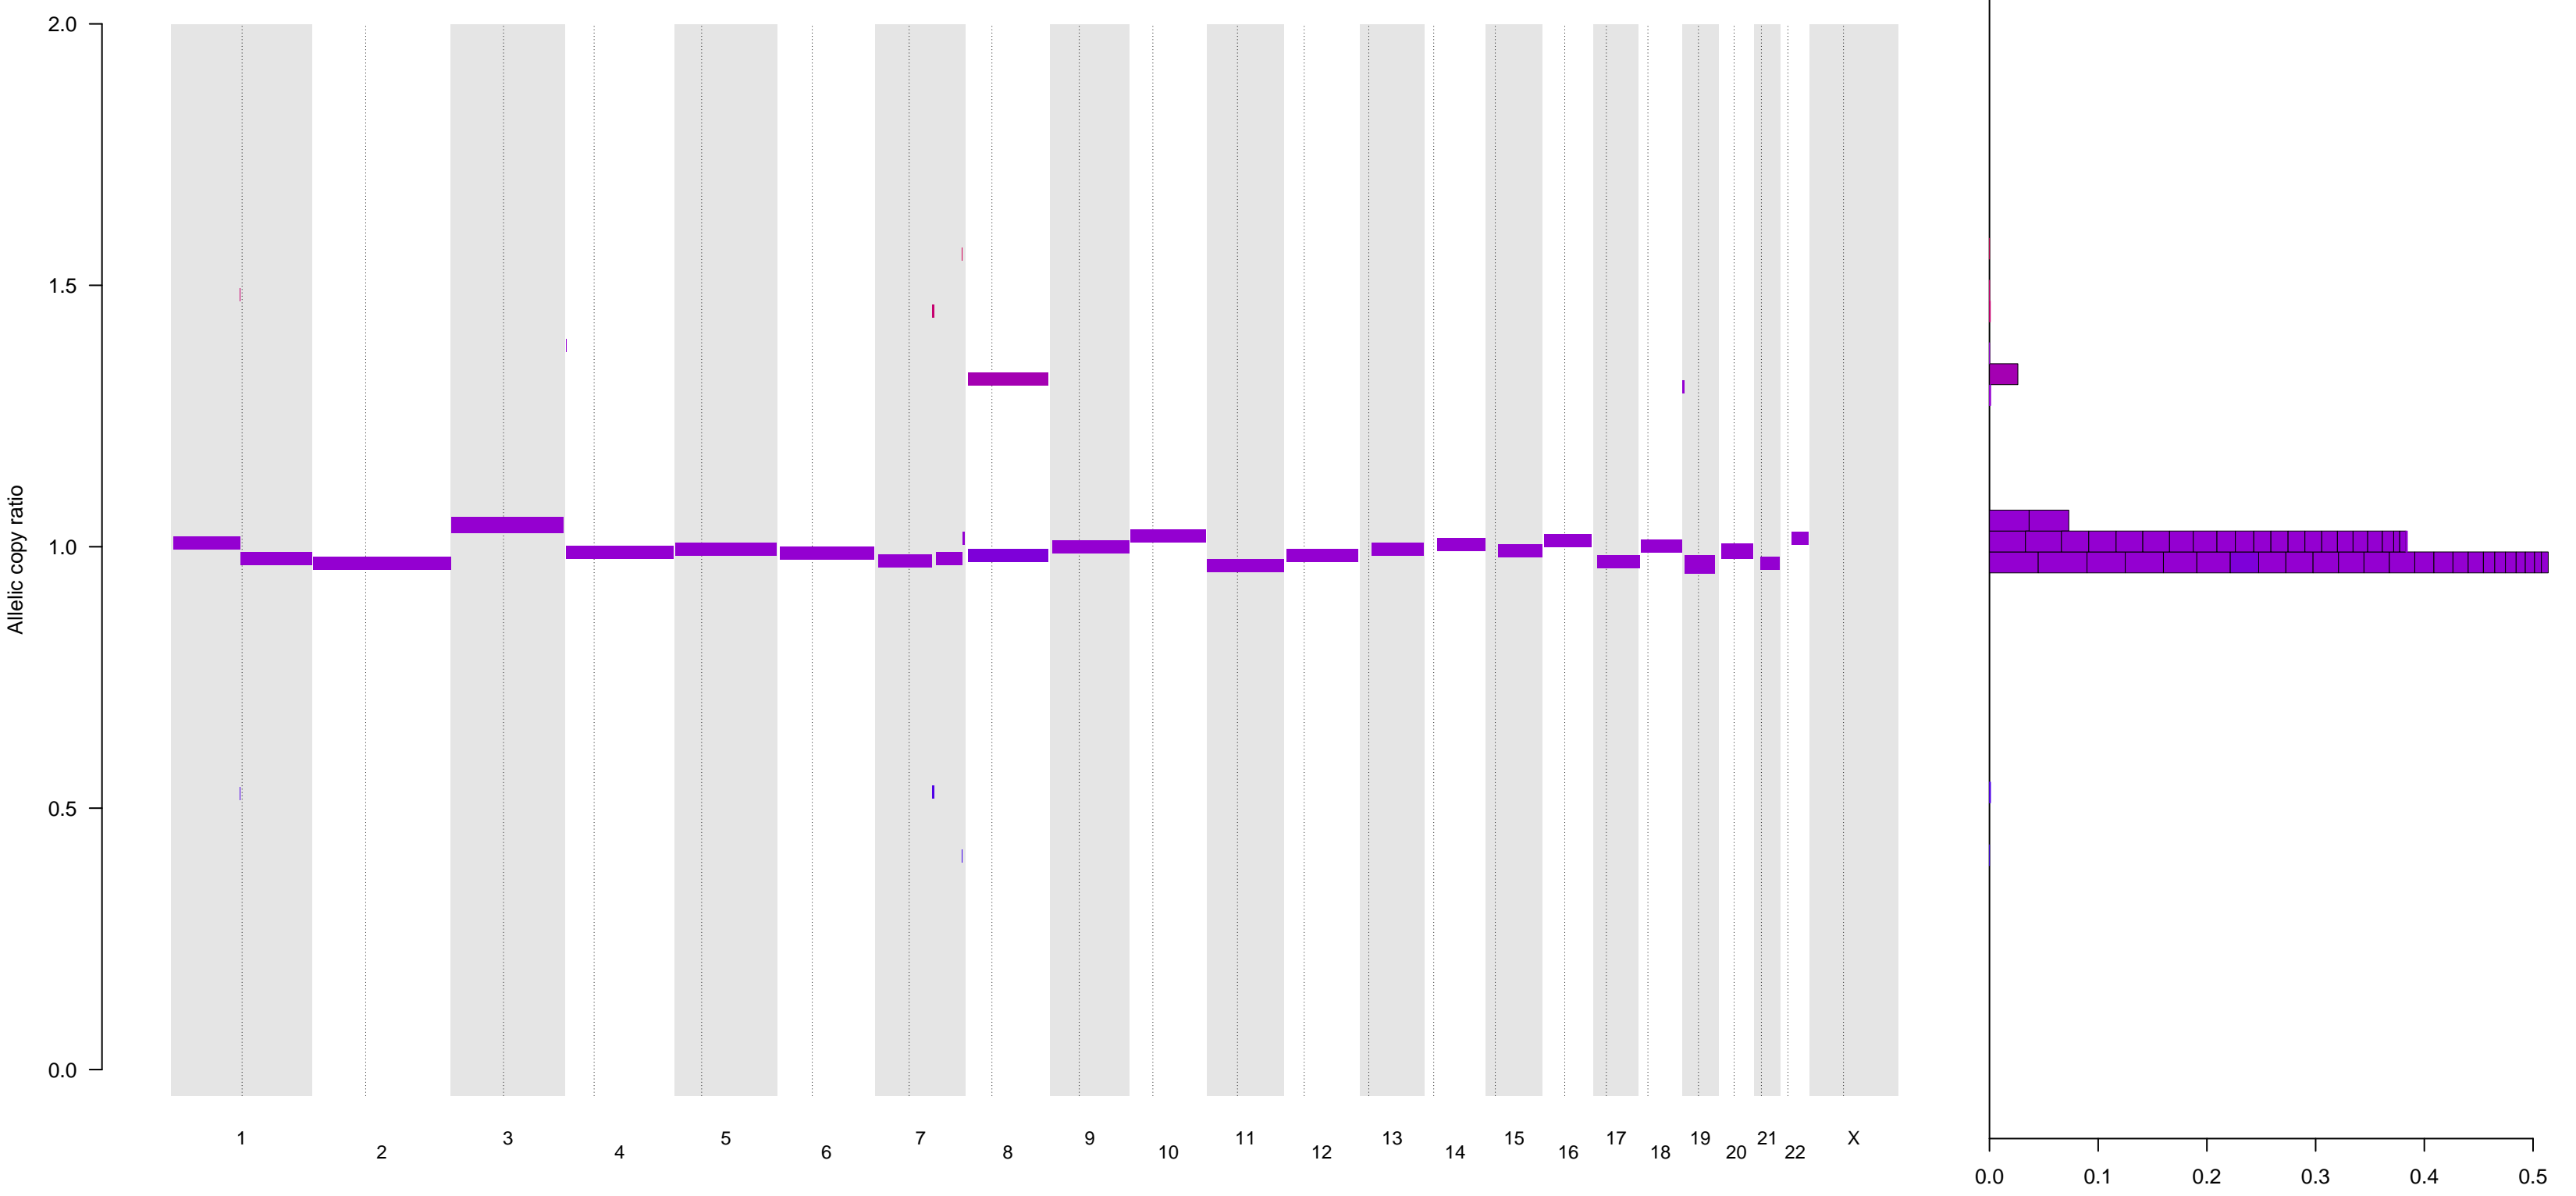

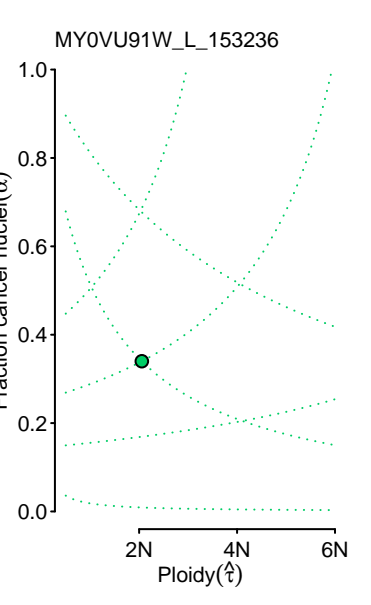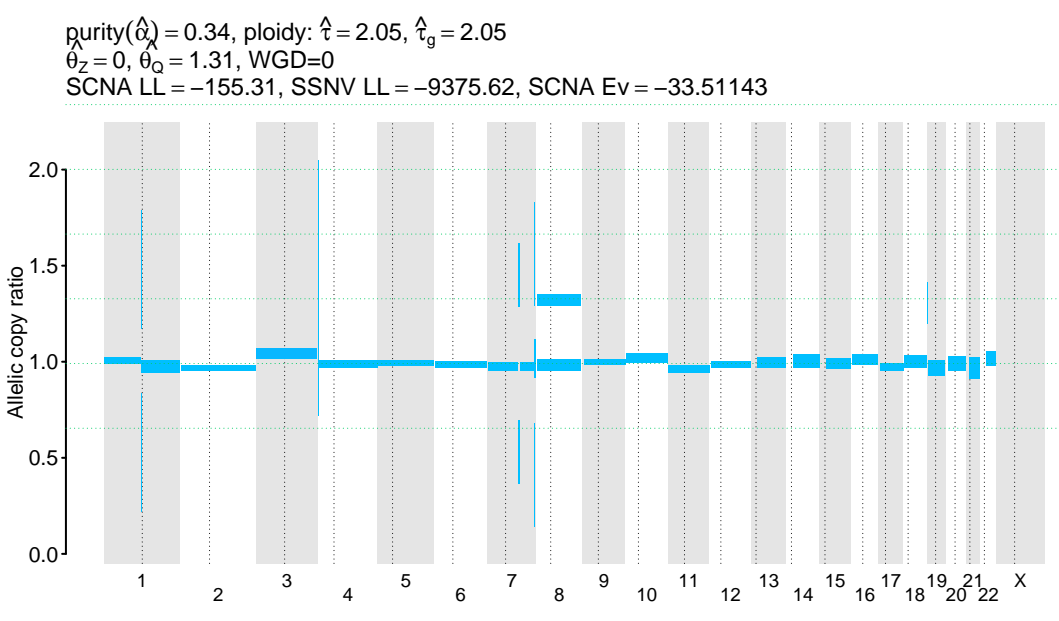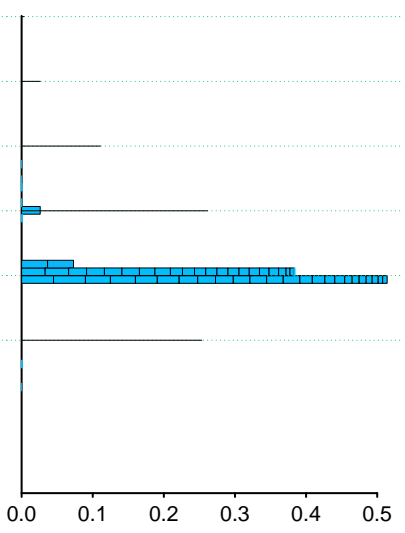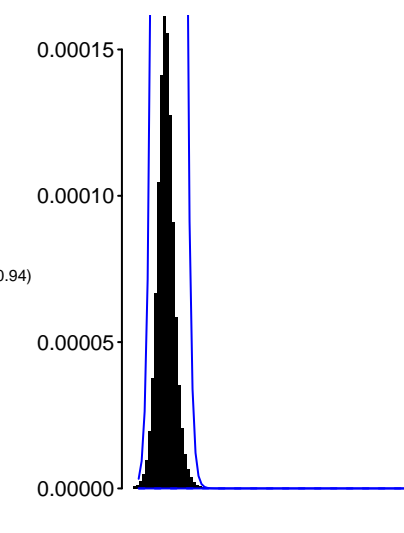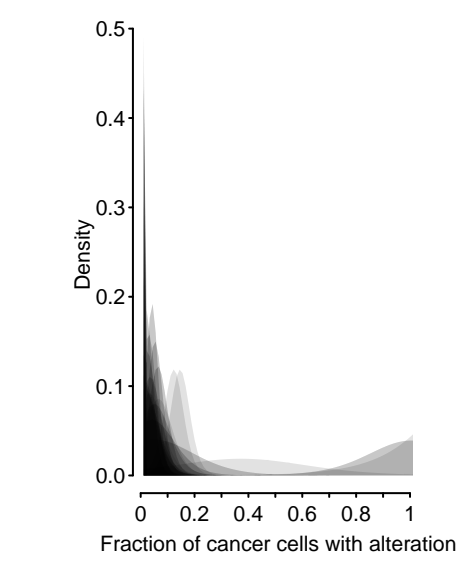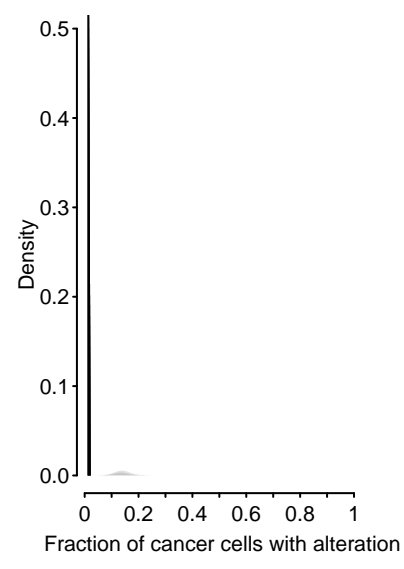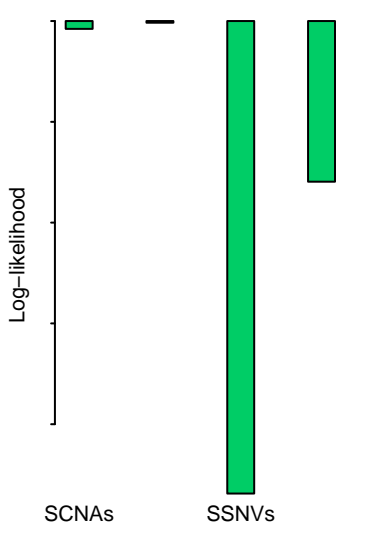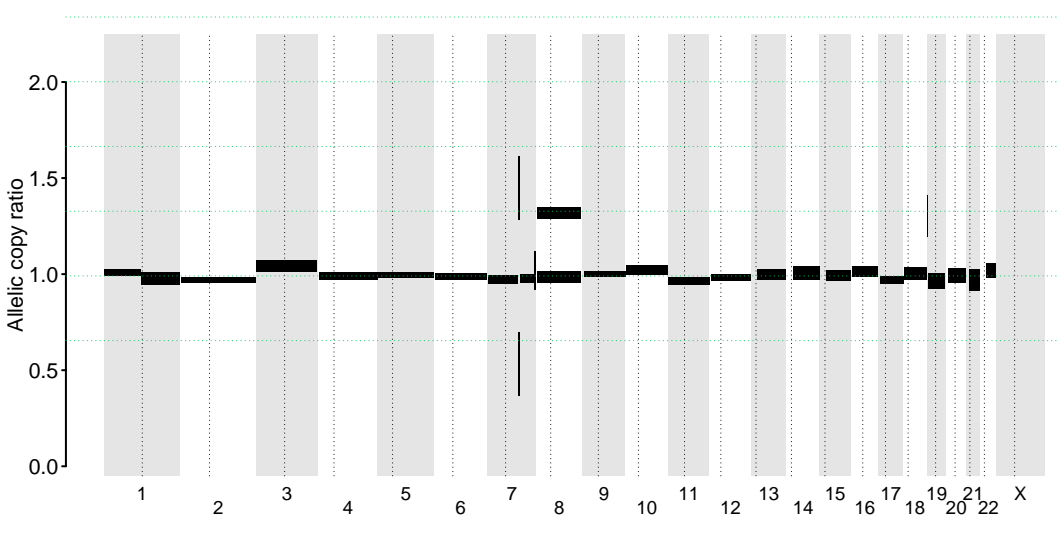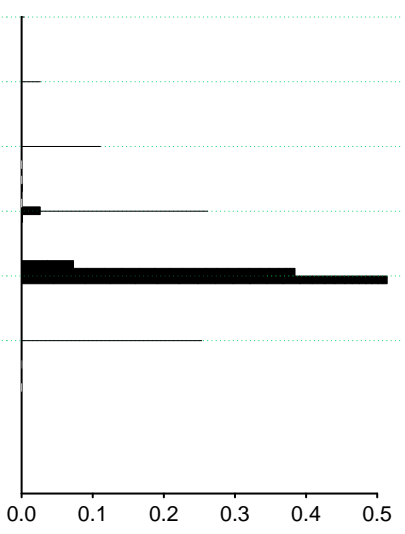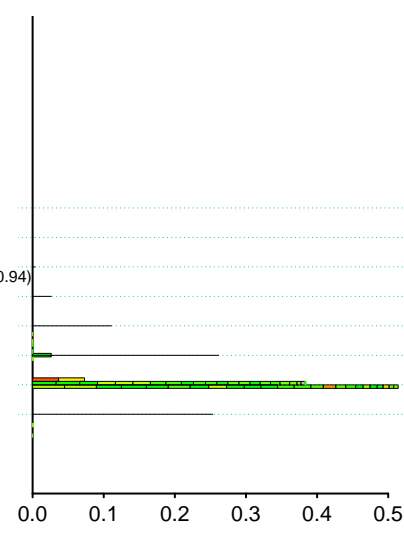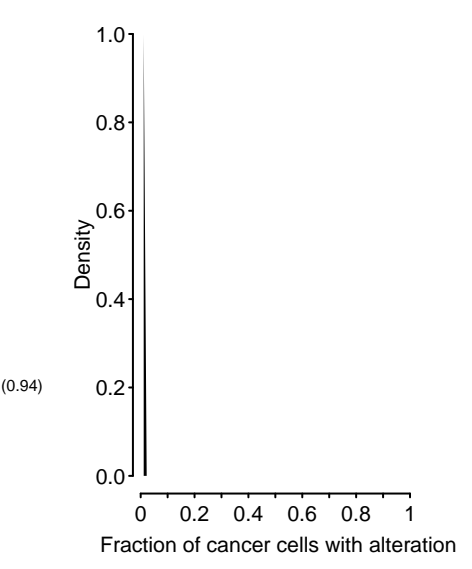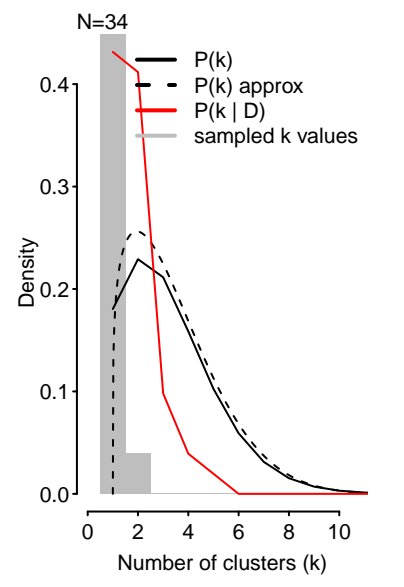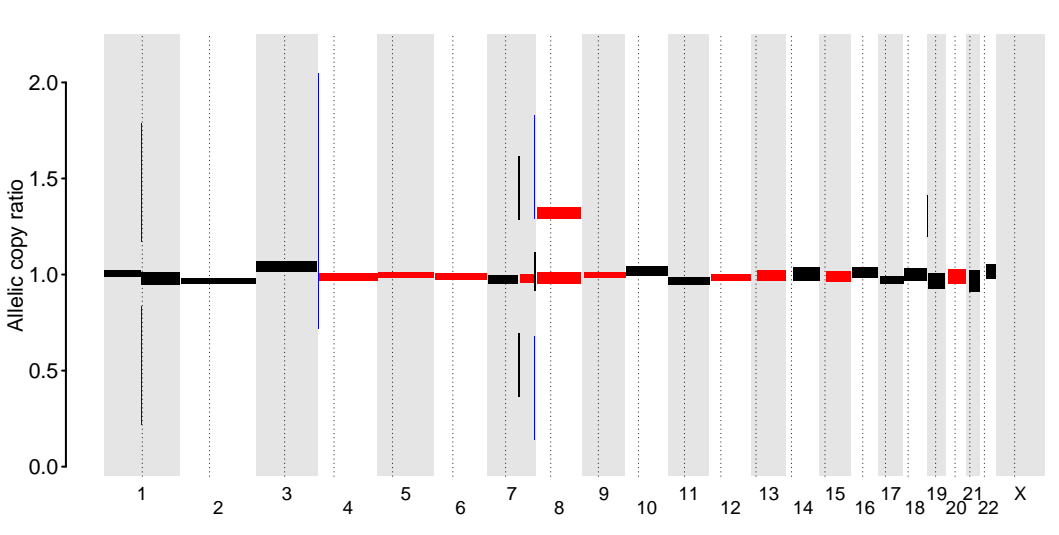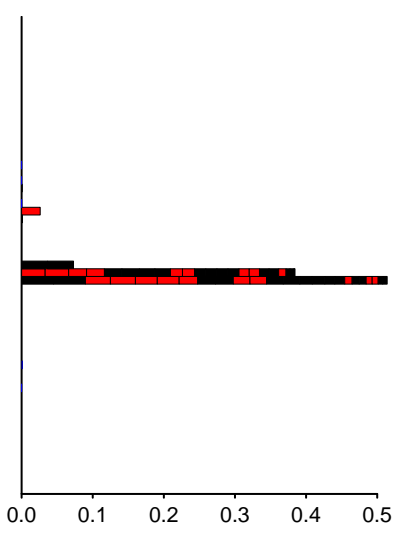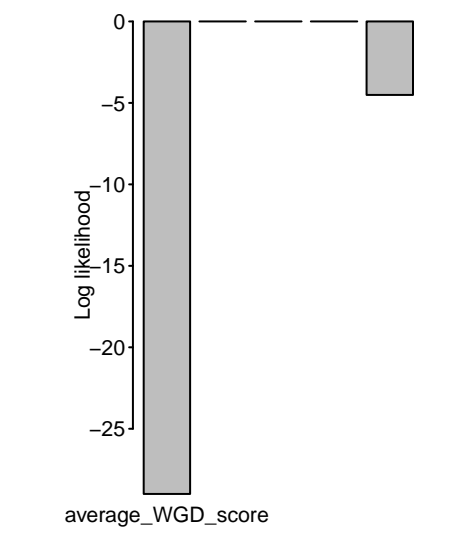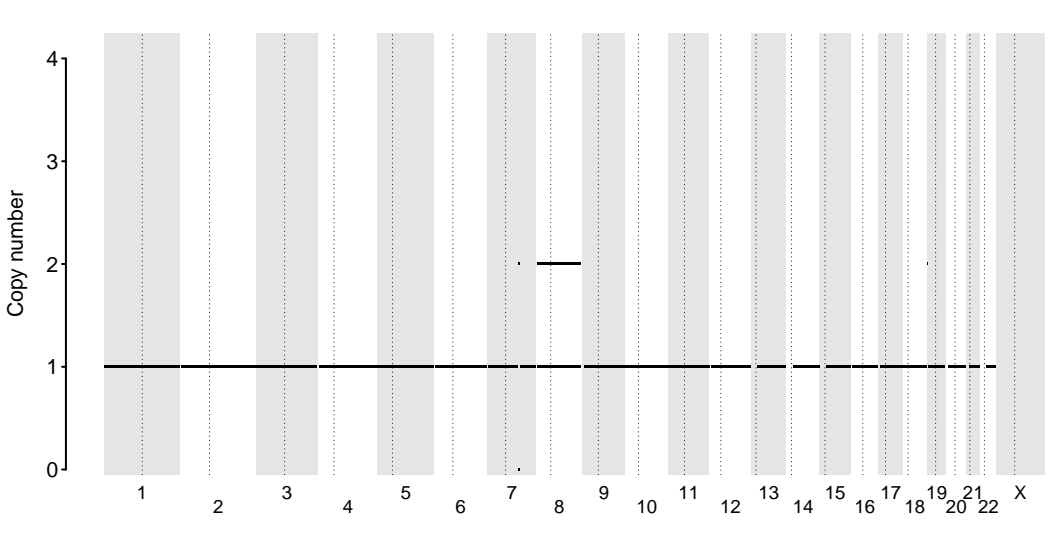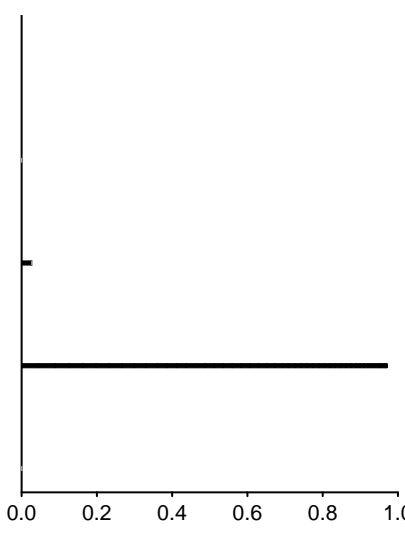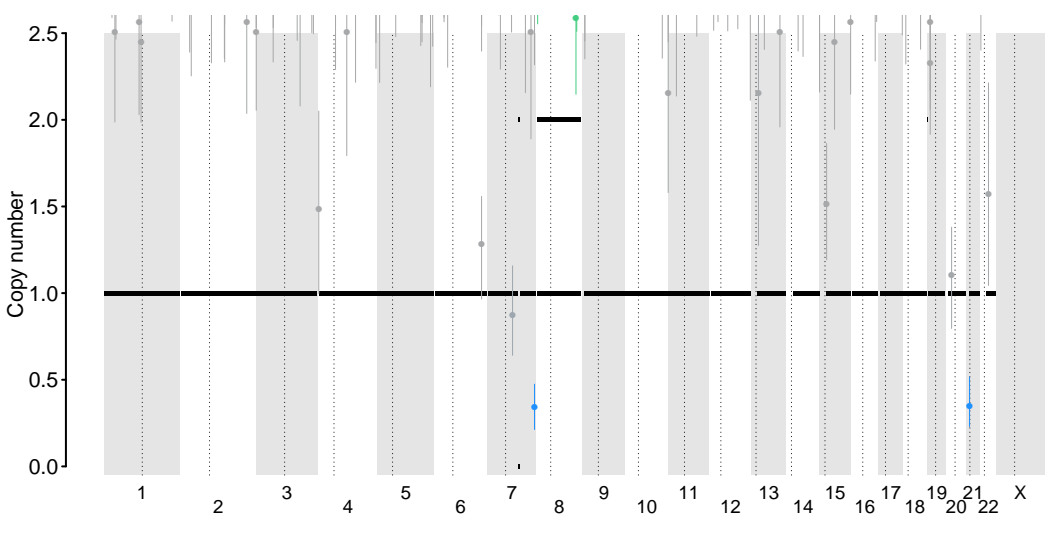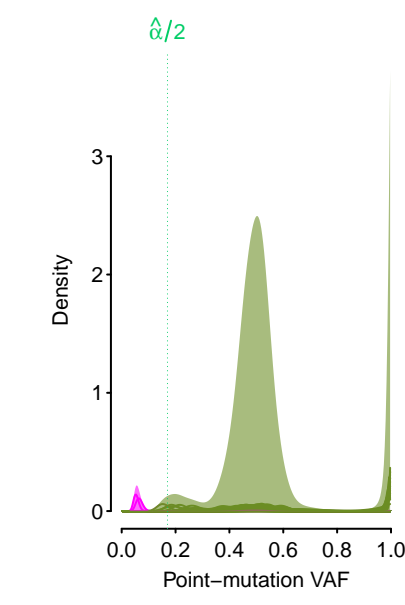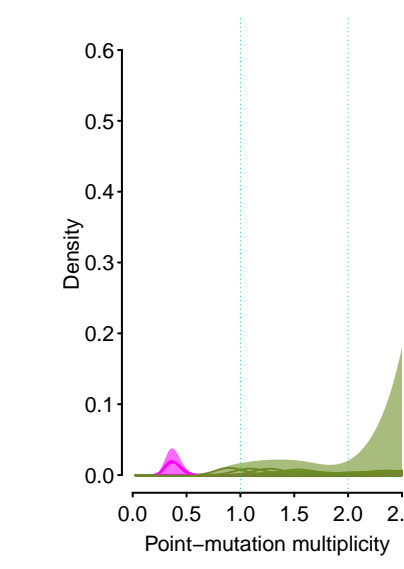

Sample 84

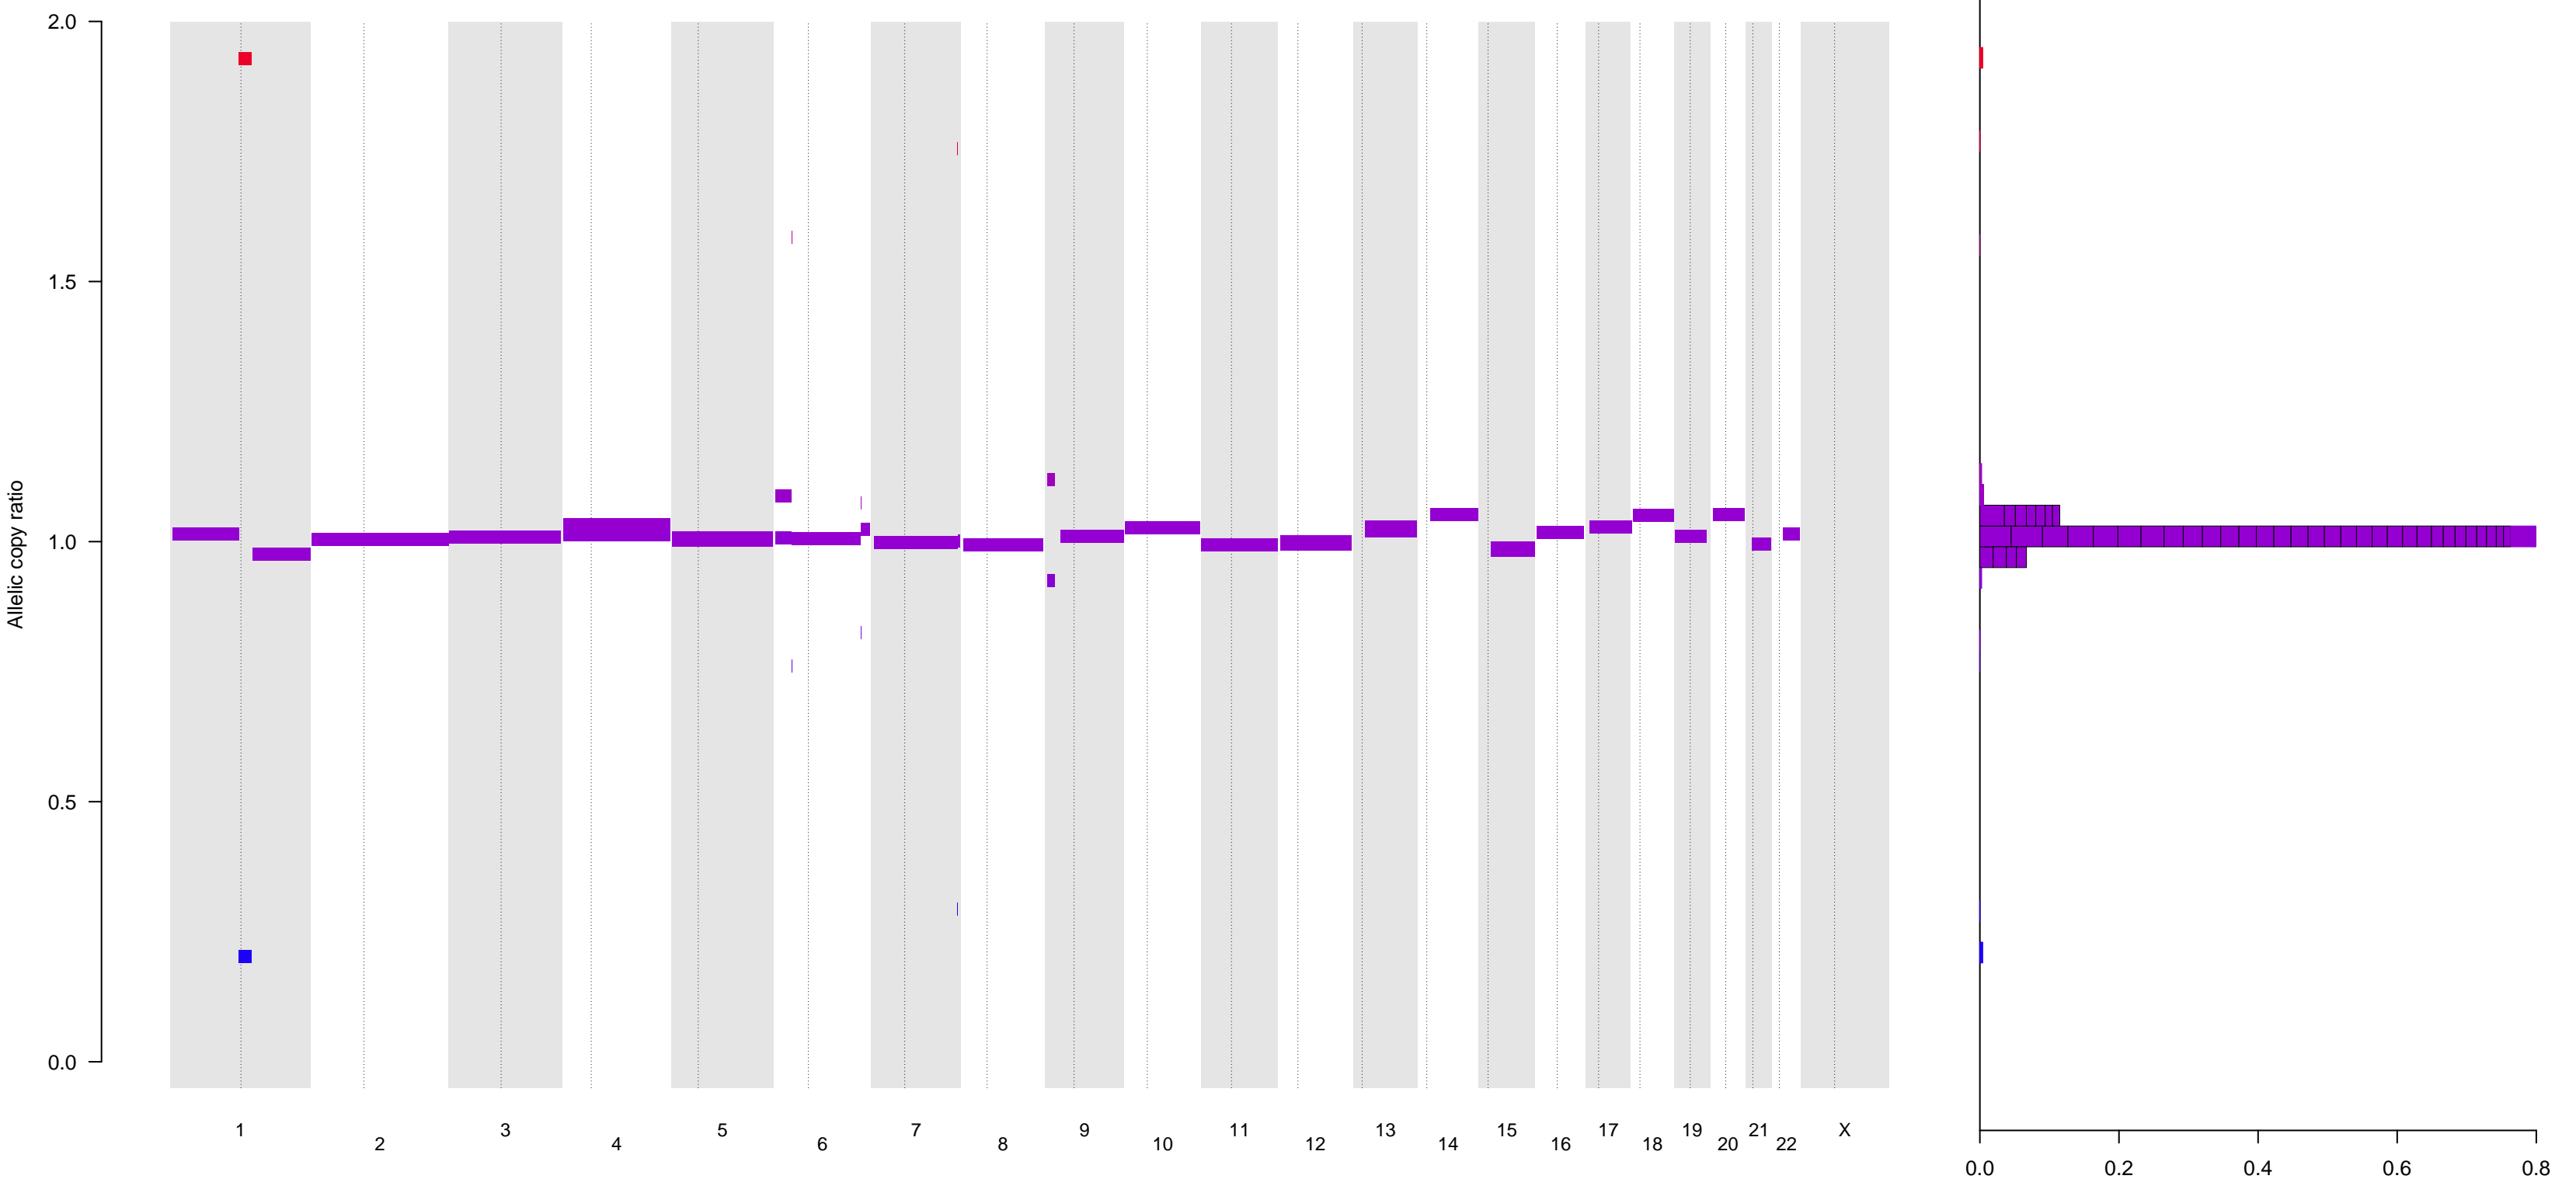

$\hat{\alpha} = 0.18$ , ploidy:  $\hat{\tau} = 1.96$ ,  $\hat{\tau}_g = 2.04$   
 $\theta_z = 0.02$ ,  $\theta_{\alpha} = 1.8$ , WGD=0  
 SCNA LL = -227.61, SSNV LL = -12369.44, SCNA Ev = -29.60161

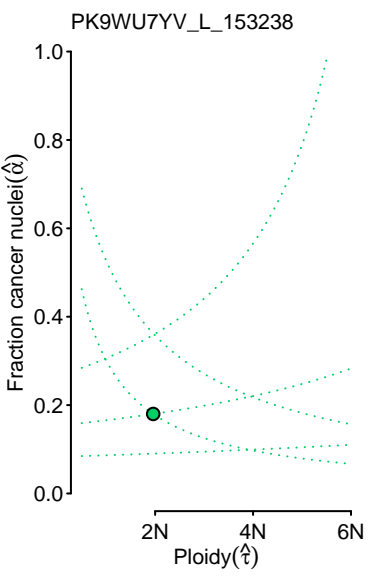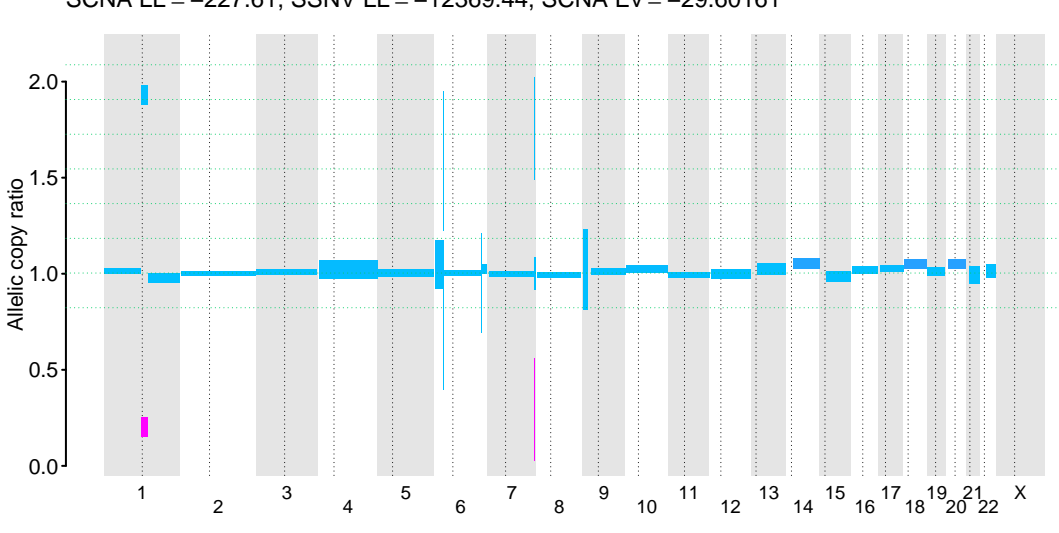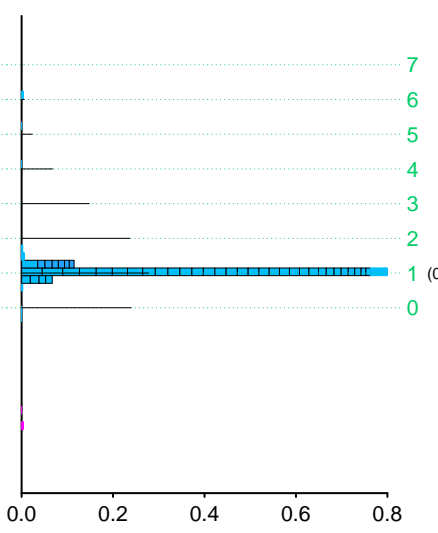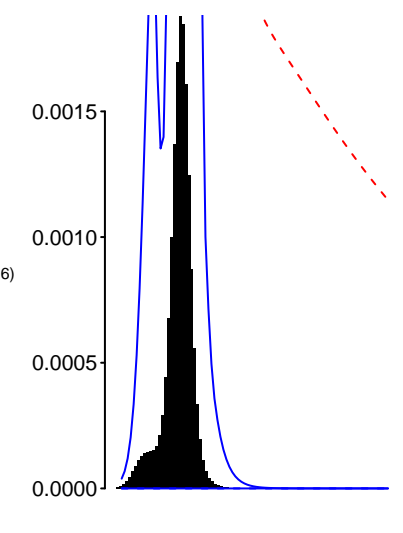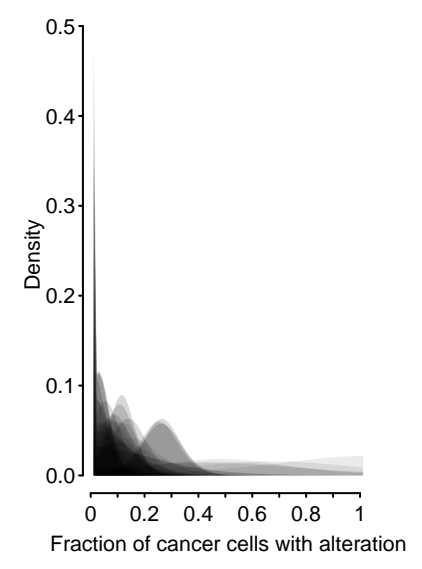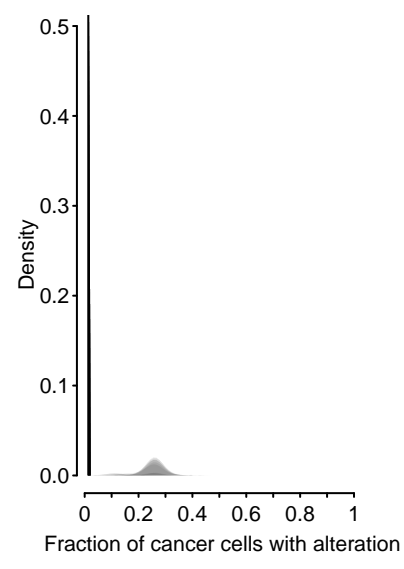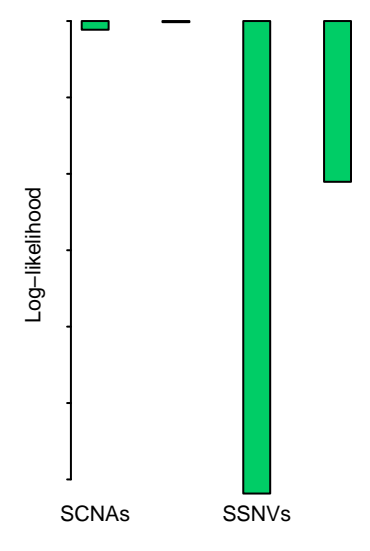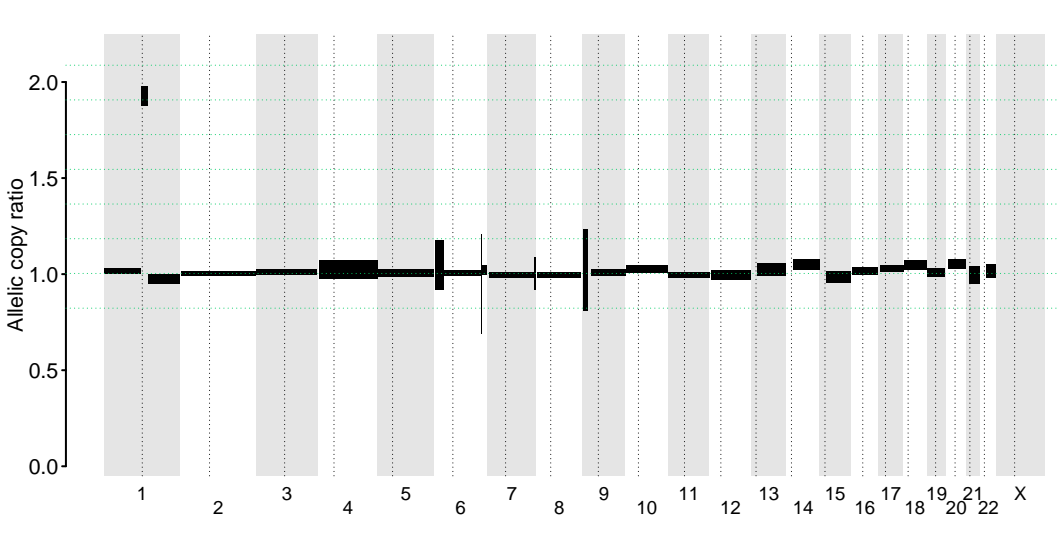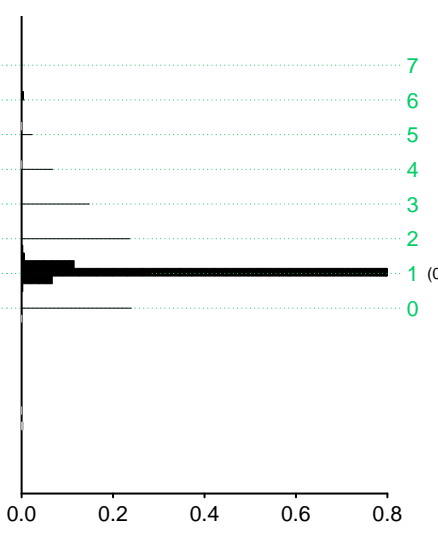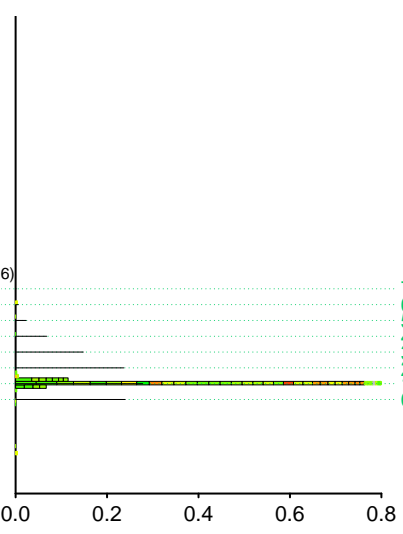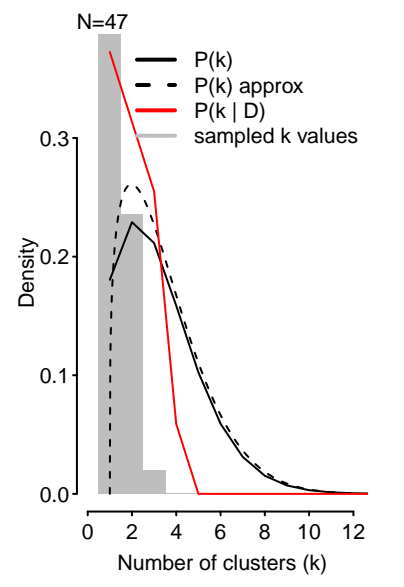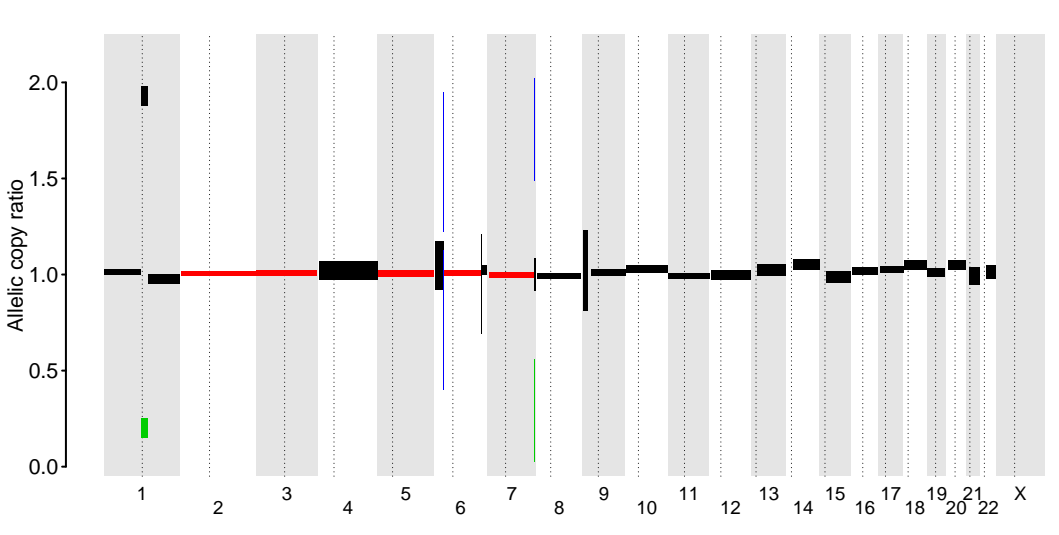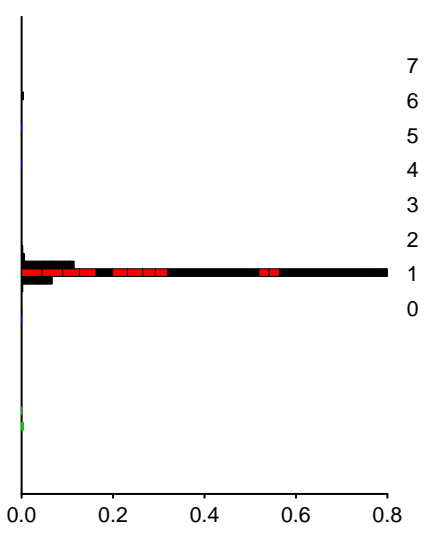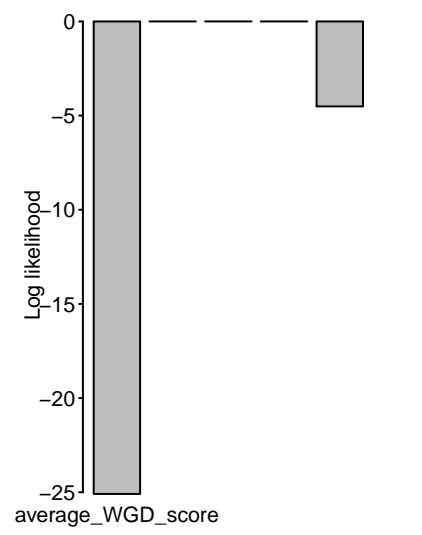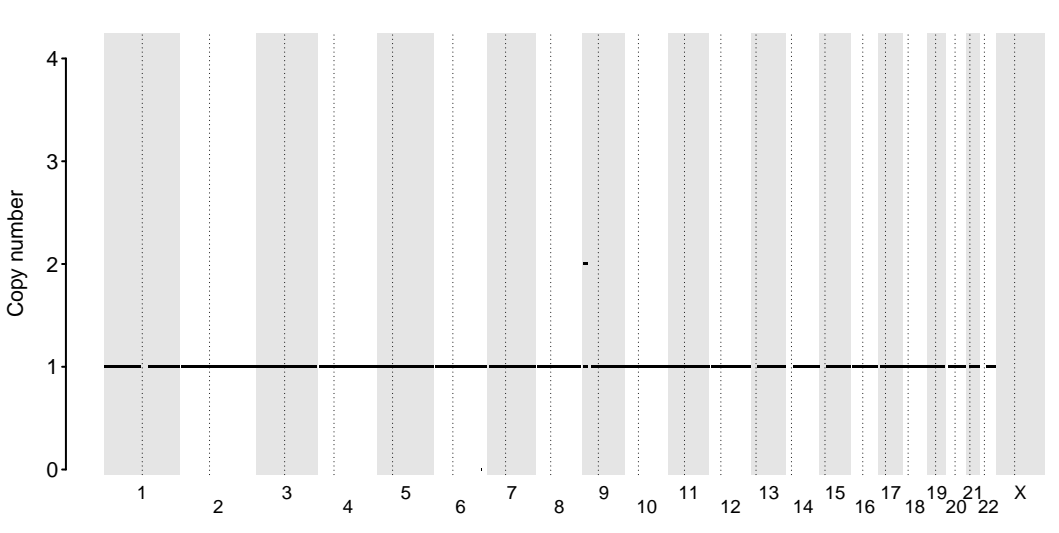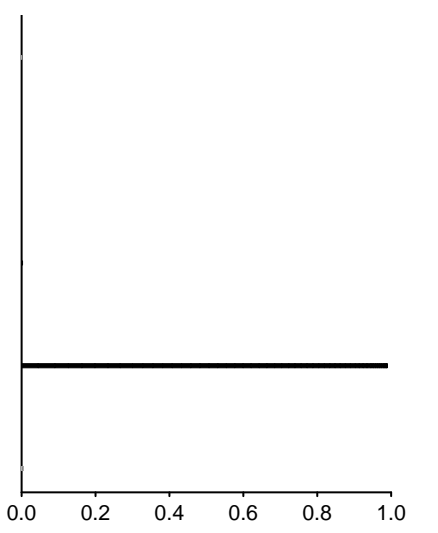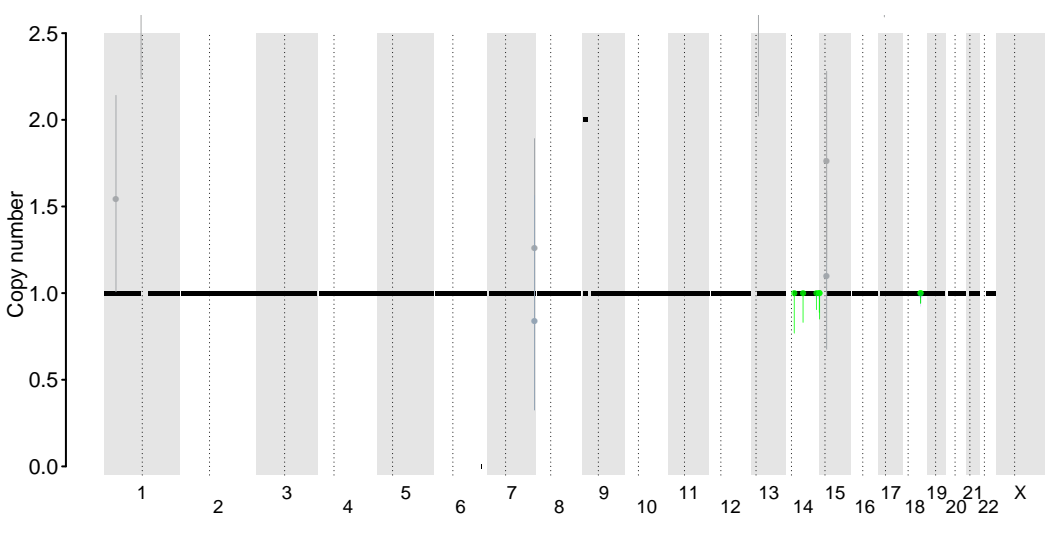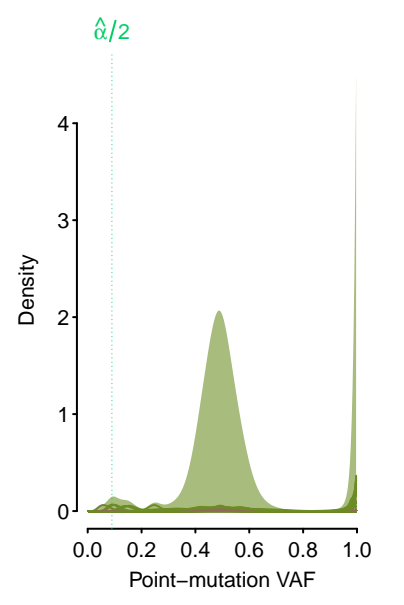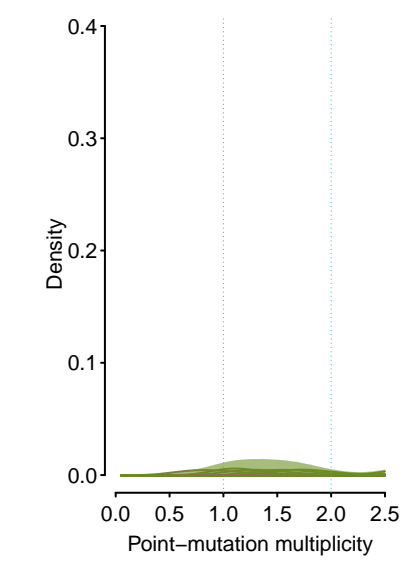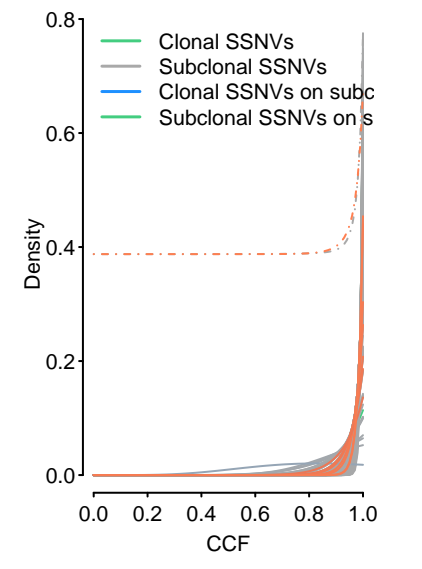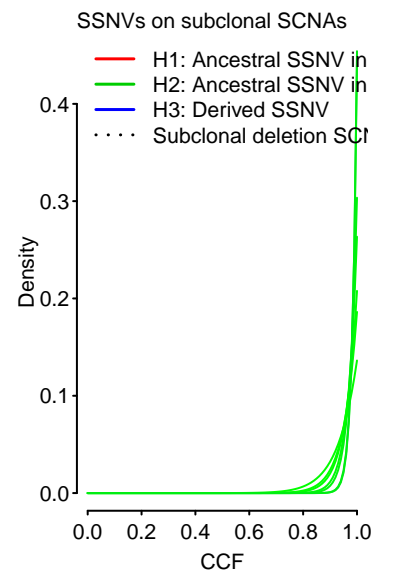

Sample 85

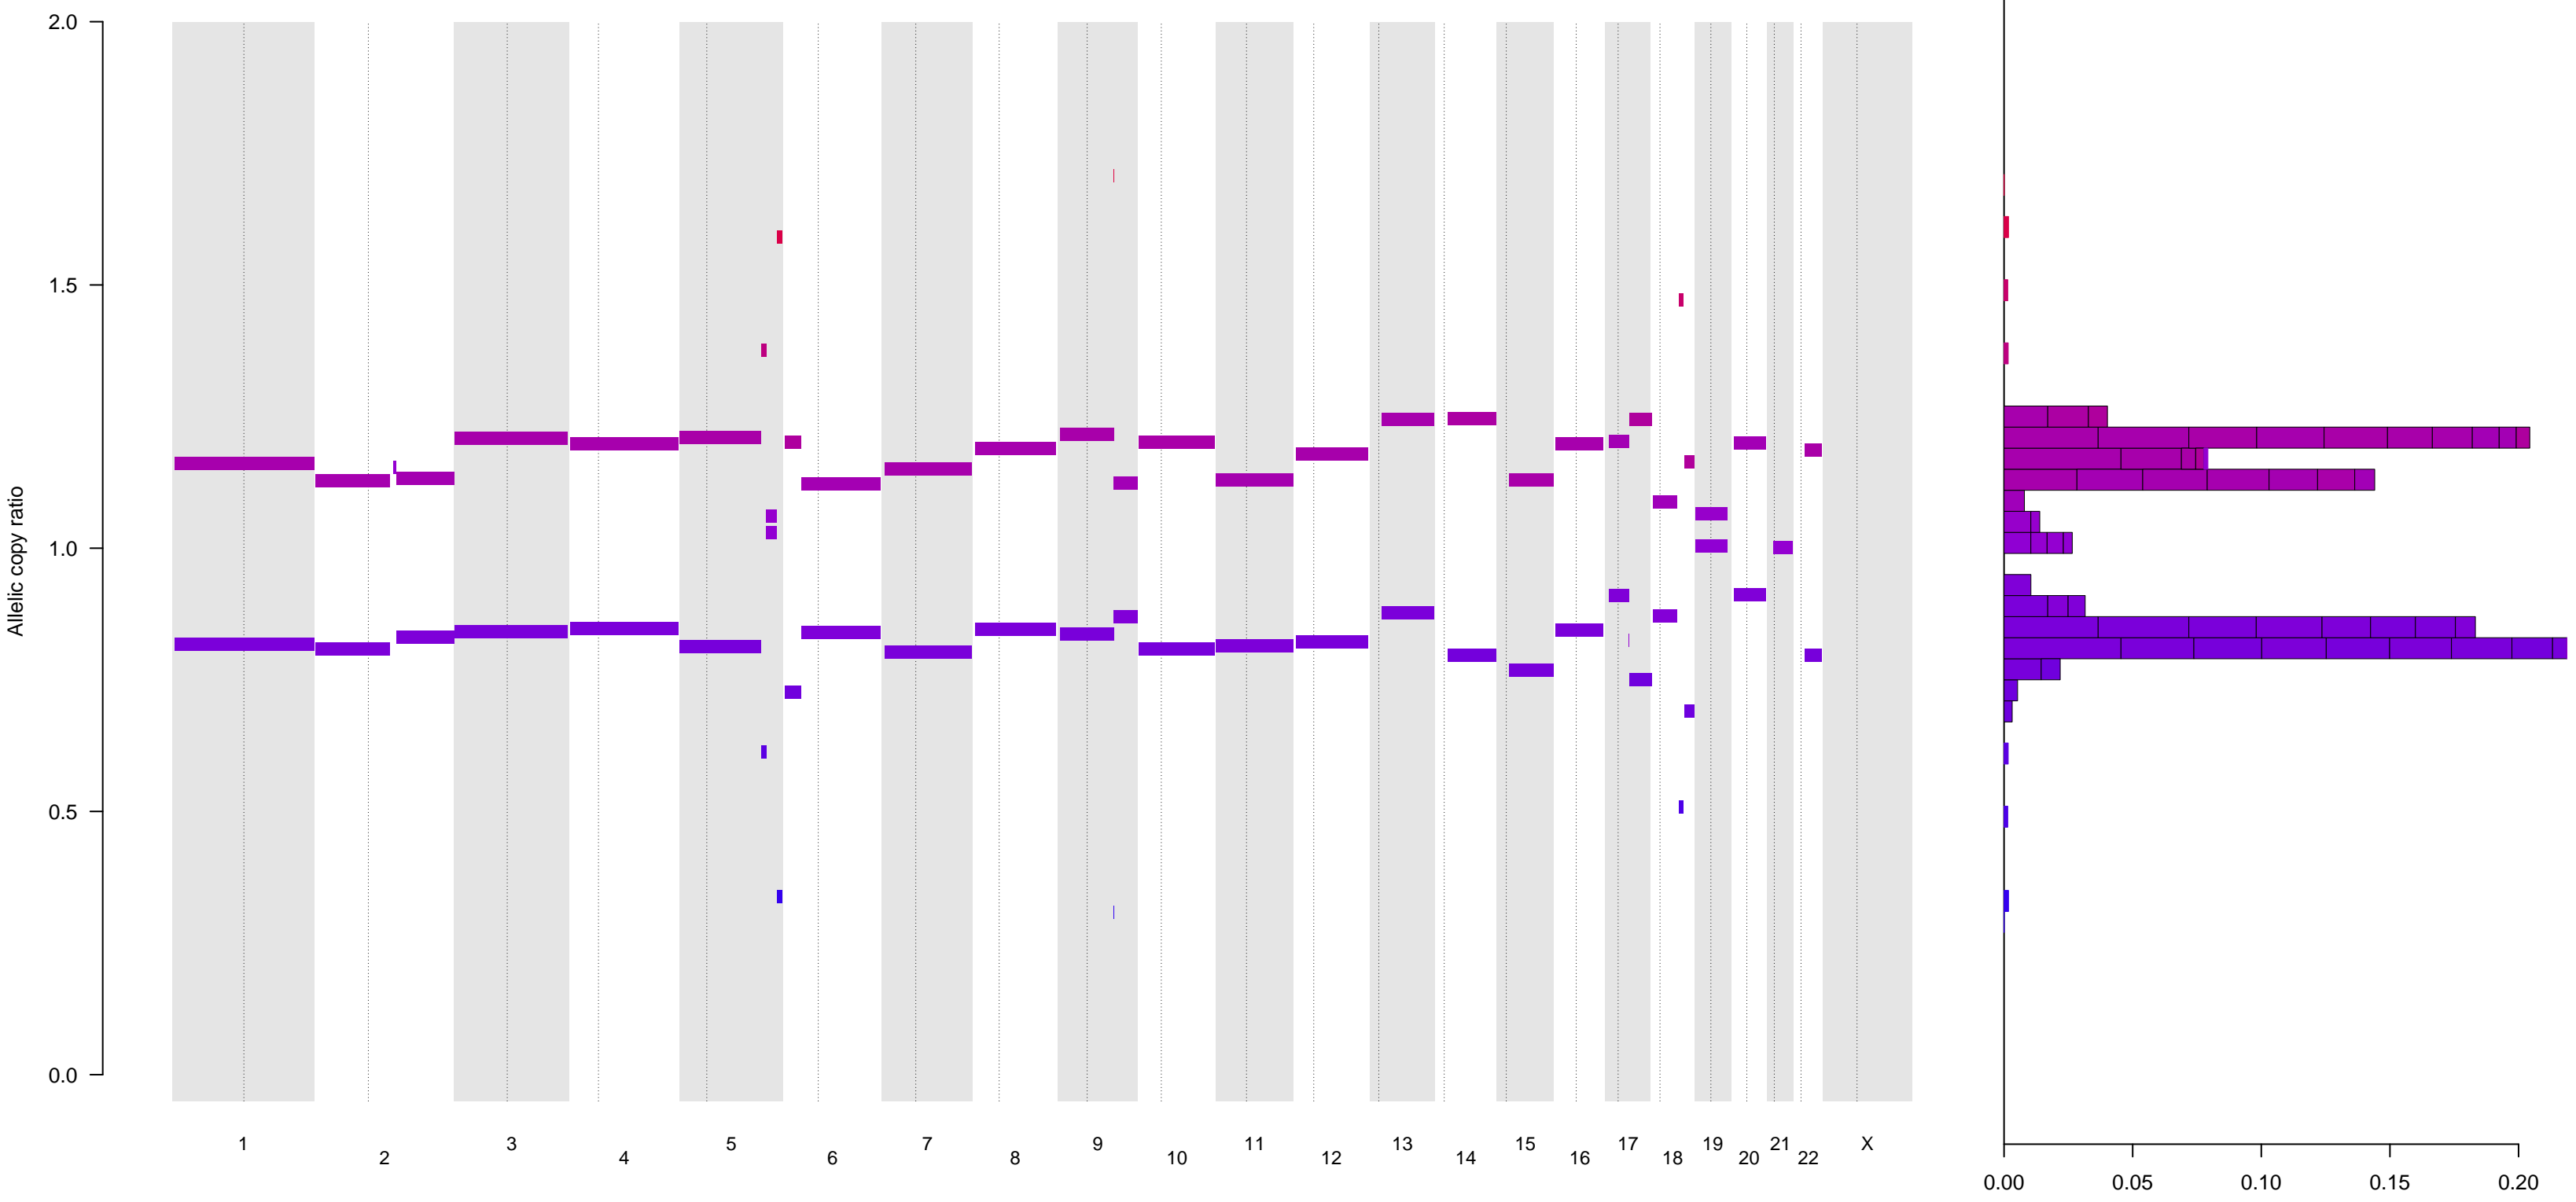



$\text{purity}(\hat{\lambda}) = 0.5$ , ploidy:  $\hat{t} = 1.39$ ,  $\hat{t}_0 = 1.12$   
 $\theta_z = 0.5$ ,  $\theta_0 = 1.076$ , WGD=0  
 SCNA LL = -295.12, SSNV LL = -1429.52, SCNA Ev = -139.5434

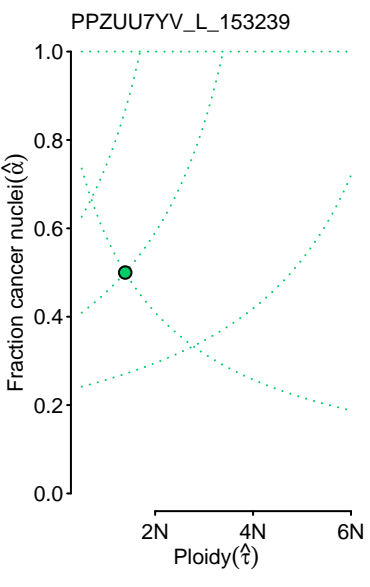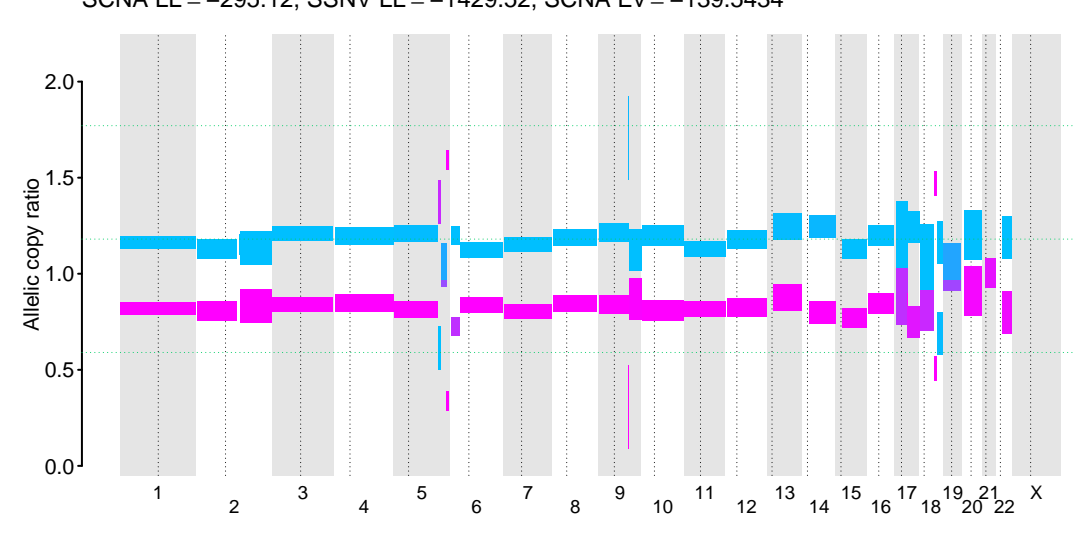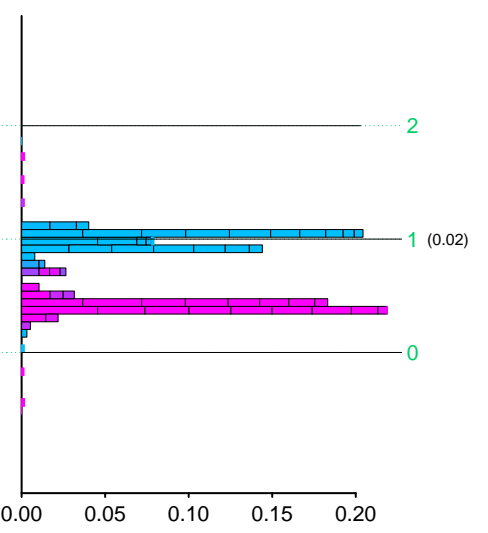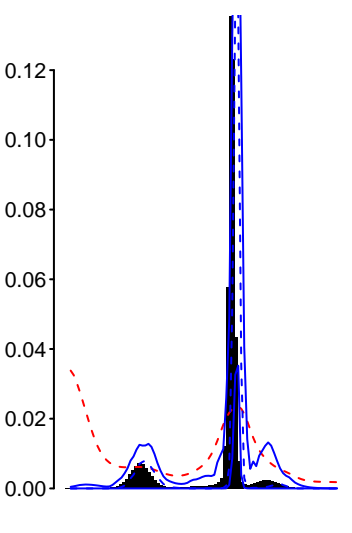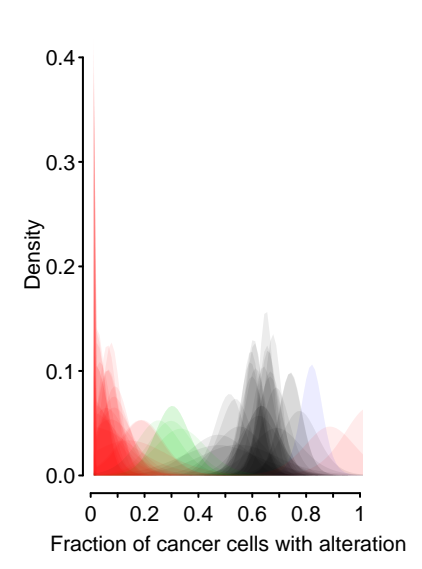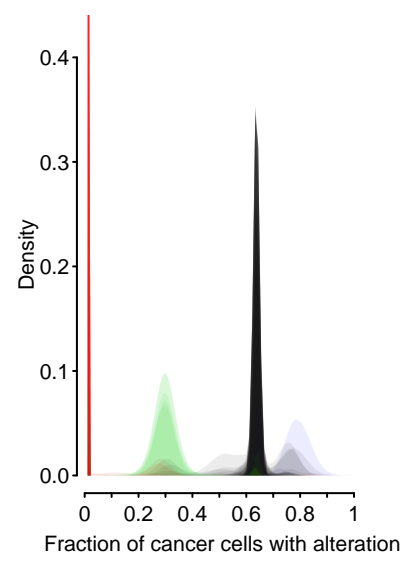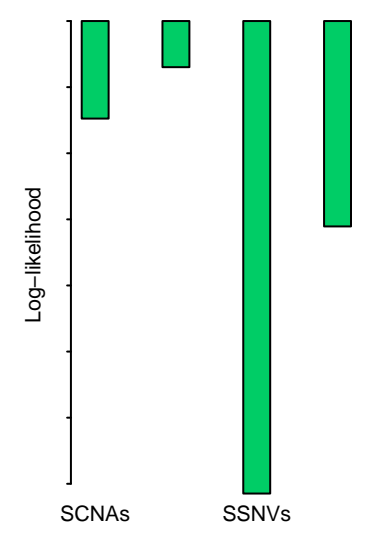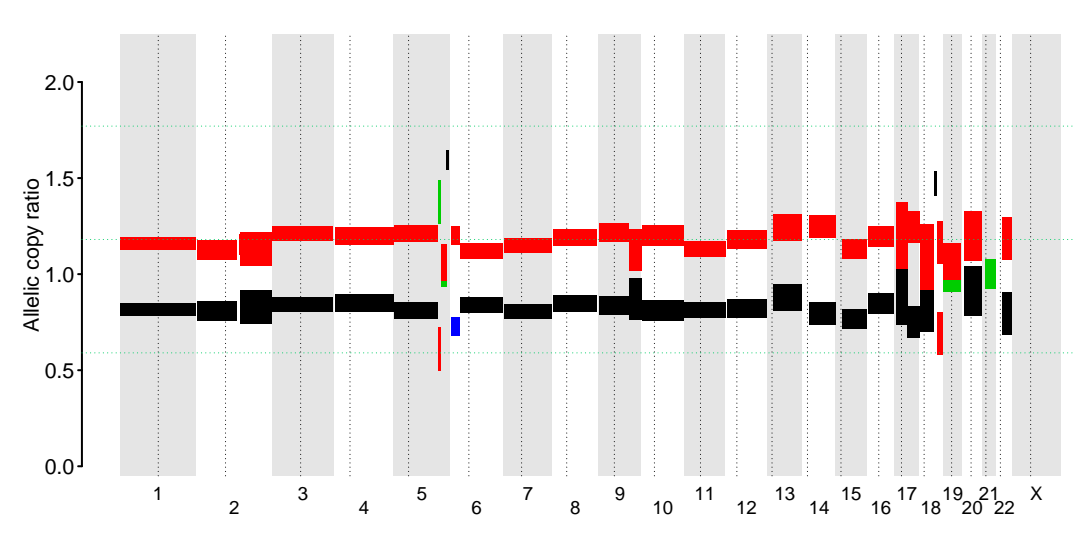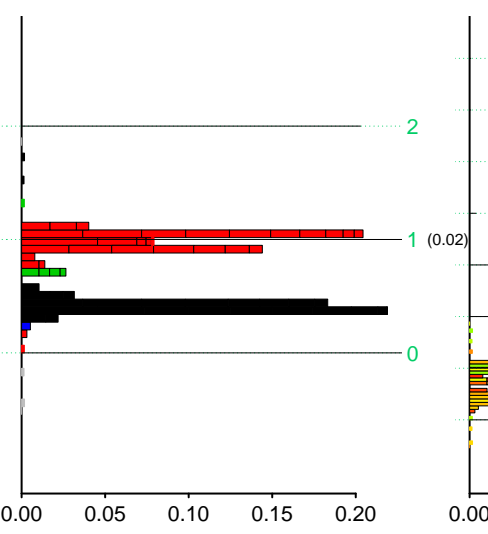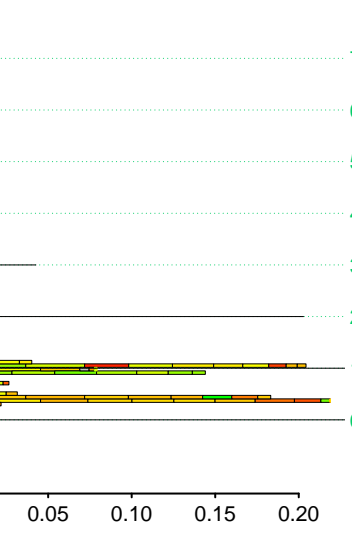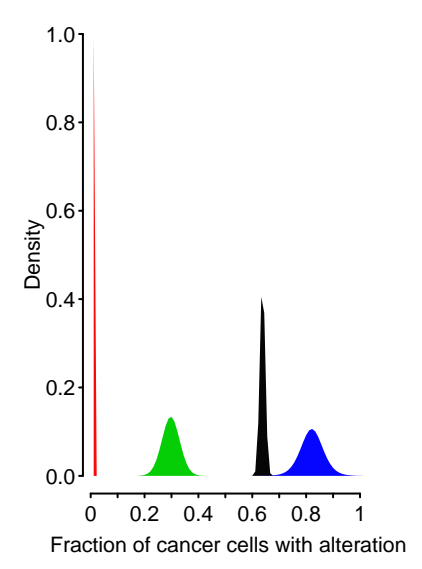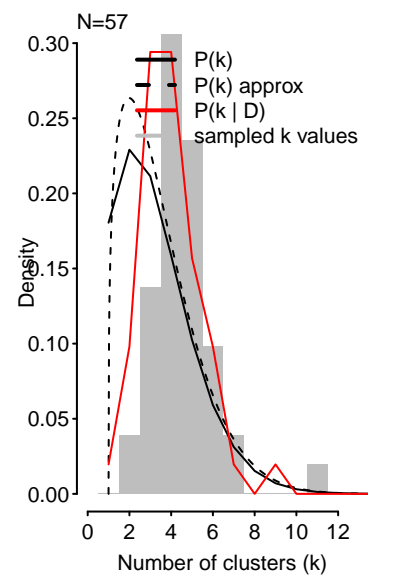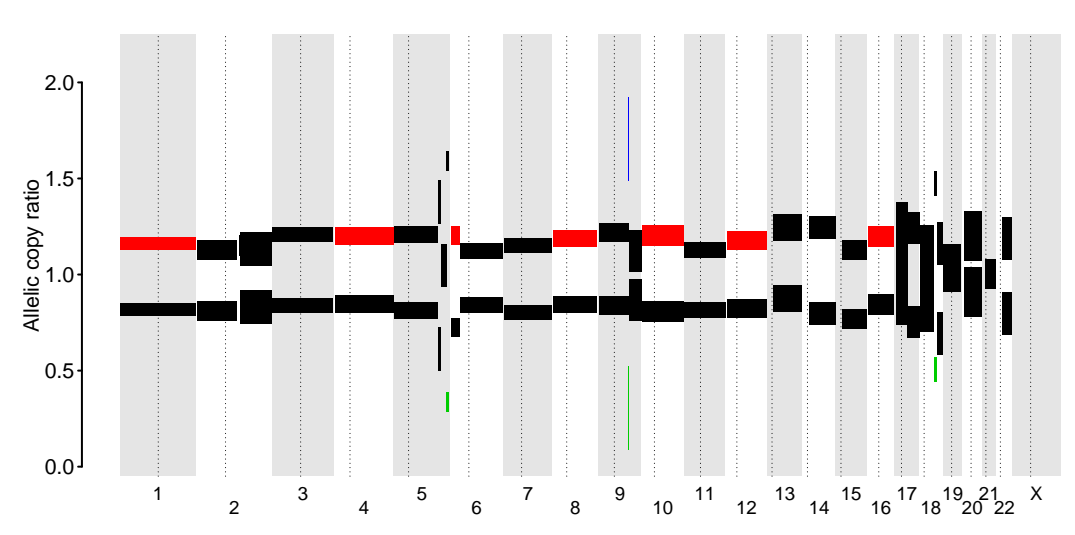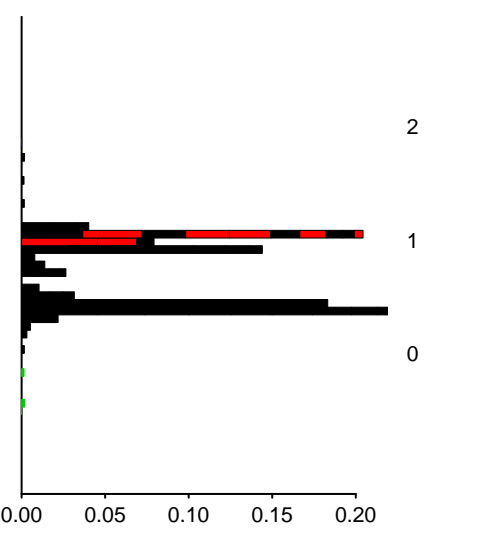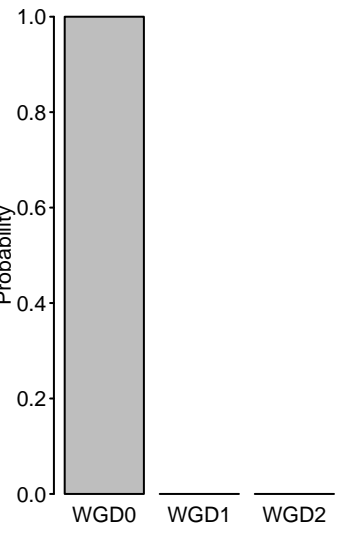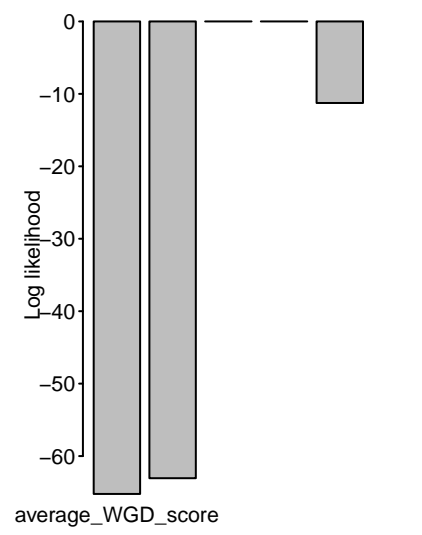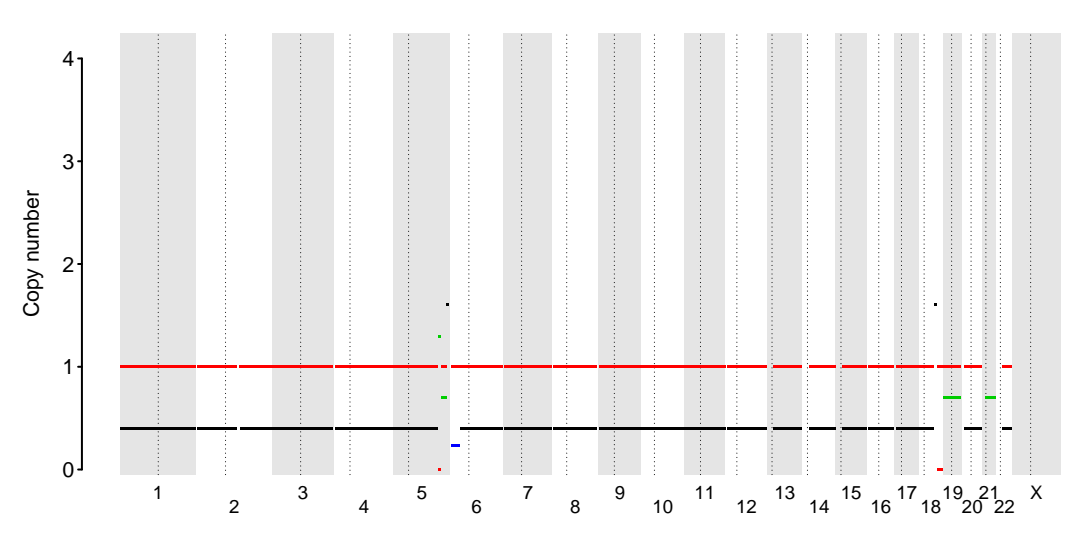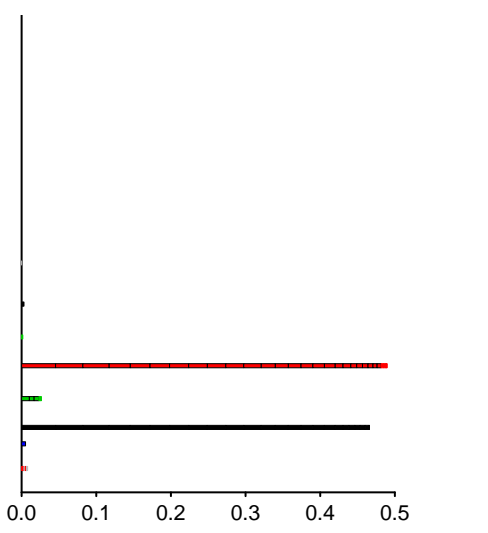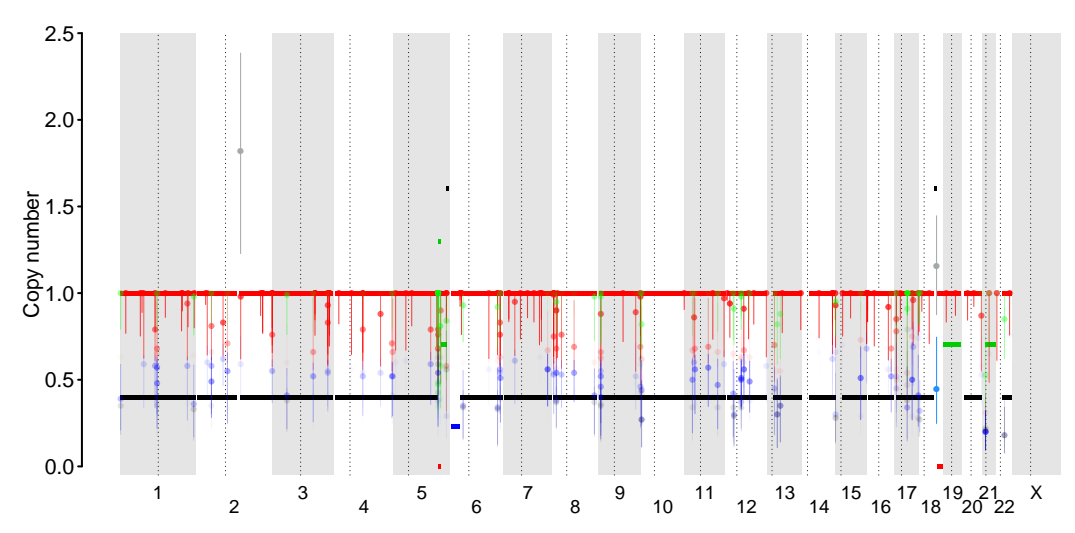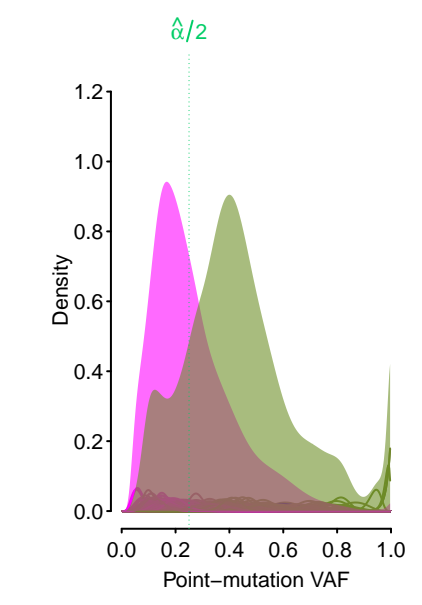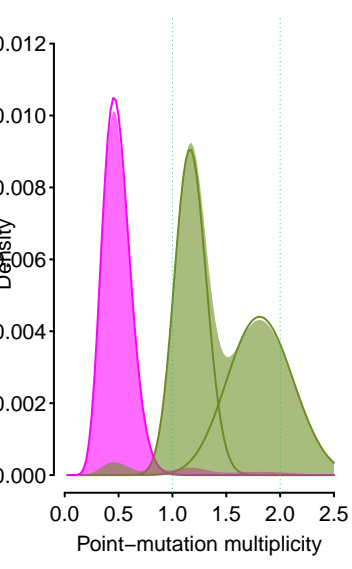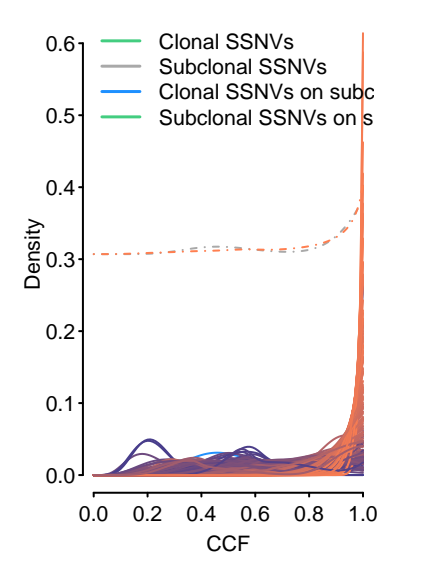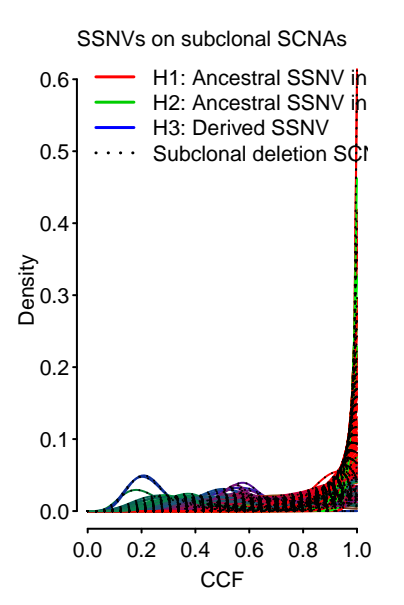



Sample 86

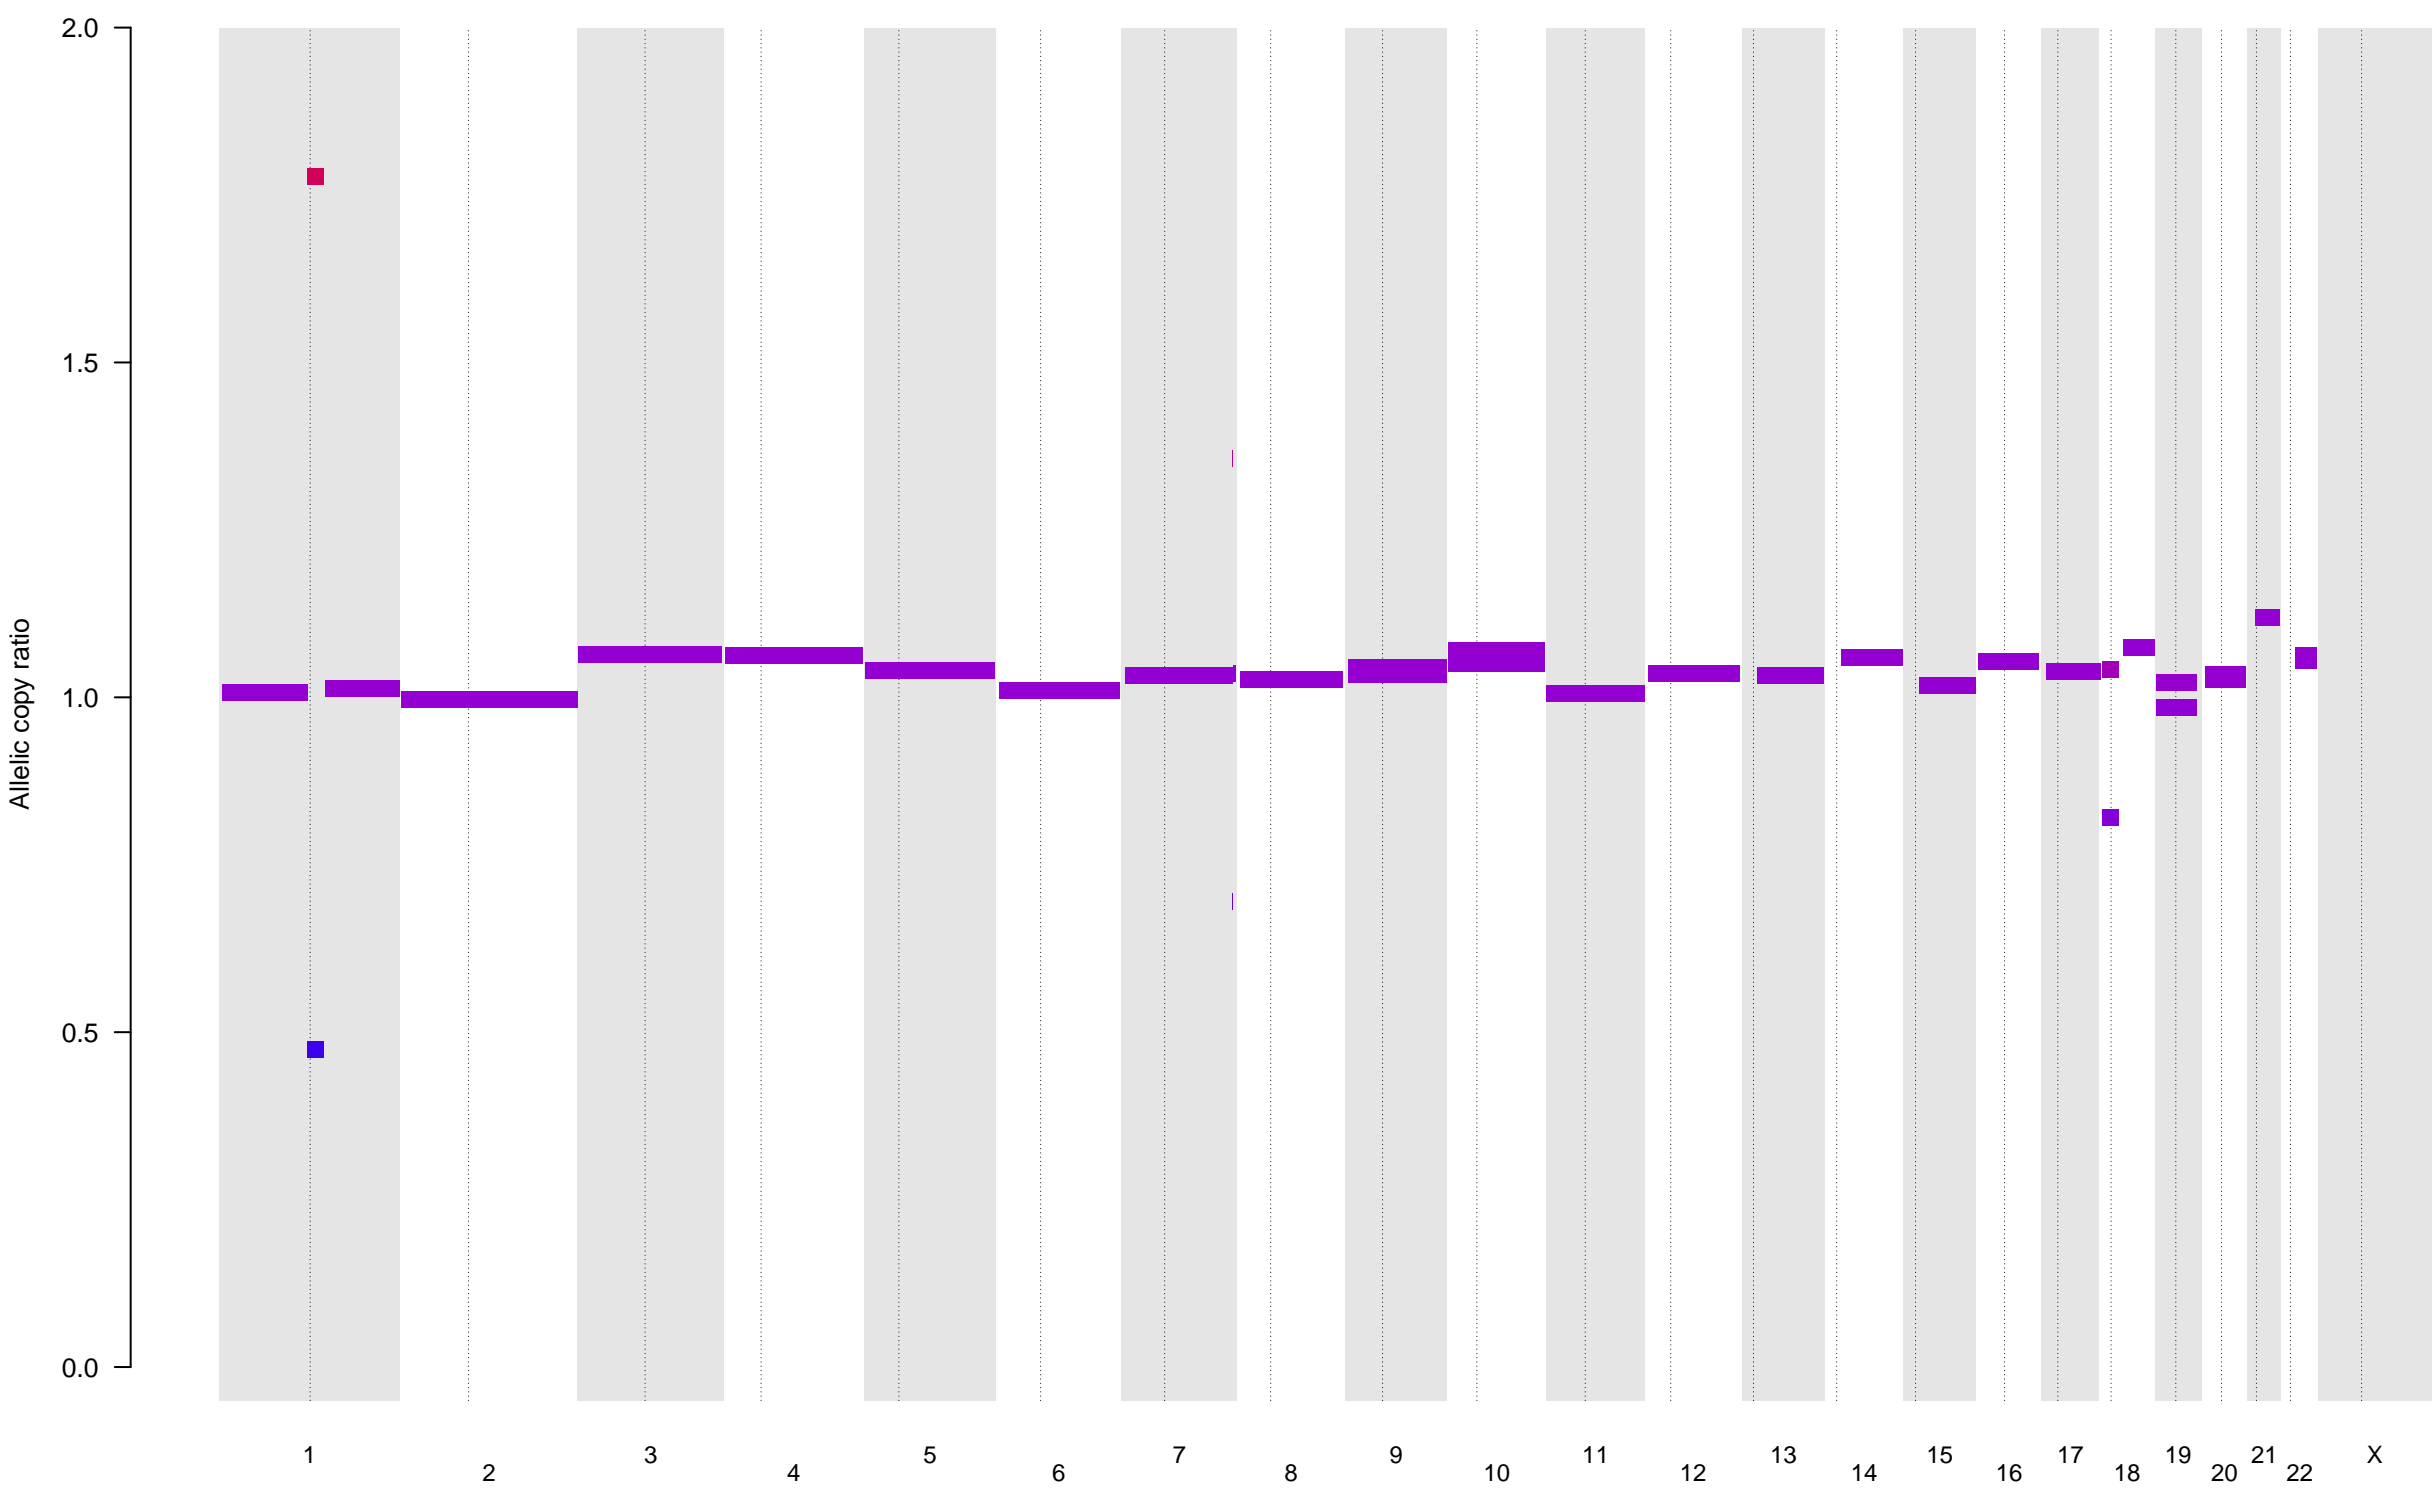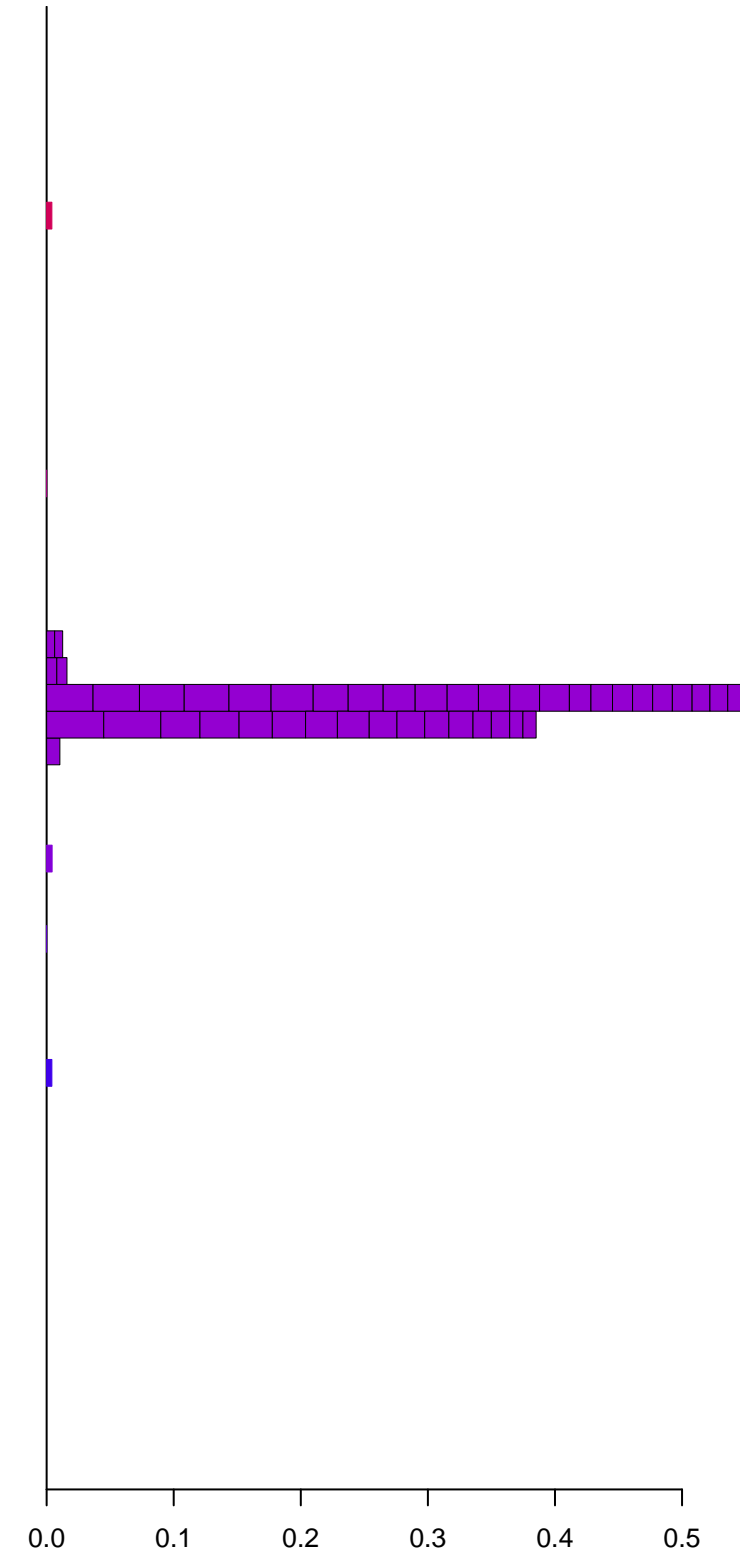

$\hat{p} = 0.19$ , ploidy:  $\hat{t} = 1.66$ ,  $\hat{t}_g = 2.02$   
 $\theta_z = 0.03$ ,  $\theta_a = 1.438$ , WGD=0  
 SCNA LL = -201, SSNV LL = -9294.77, SCNA Ev = -31.53303

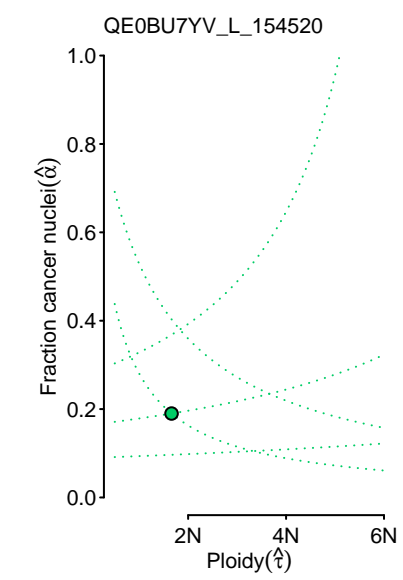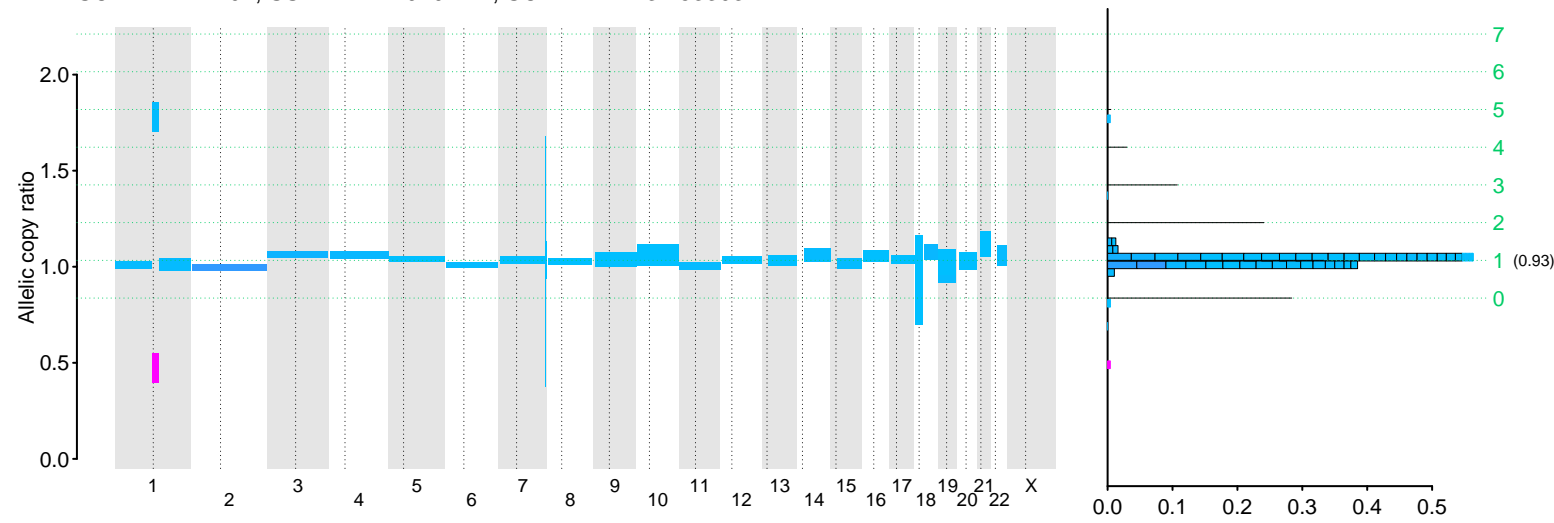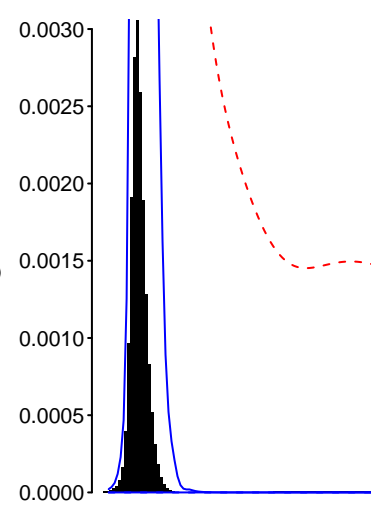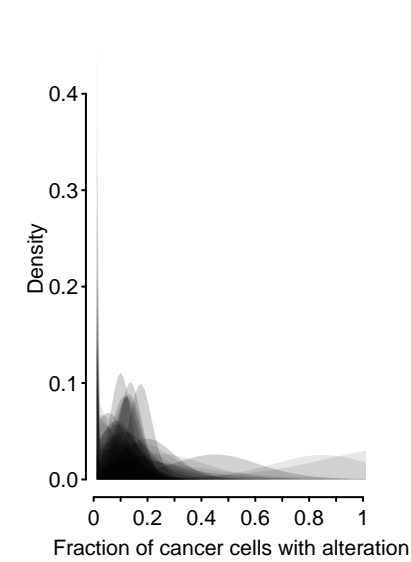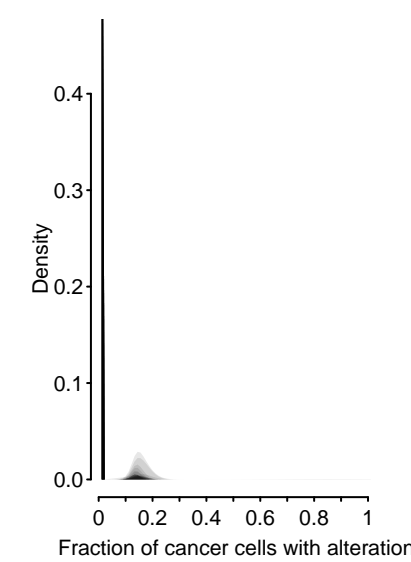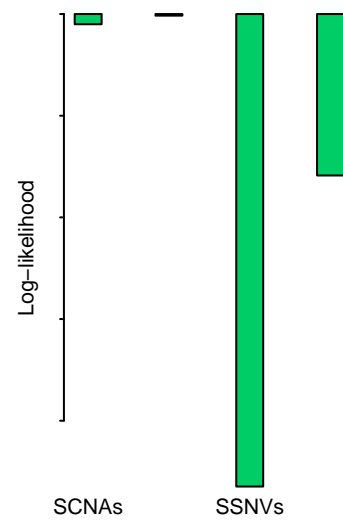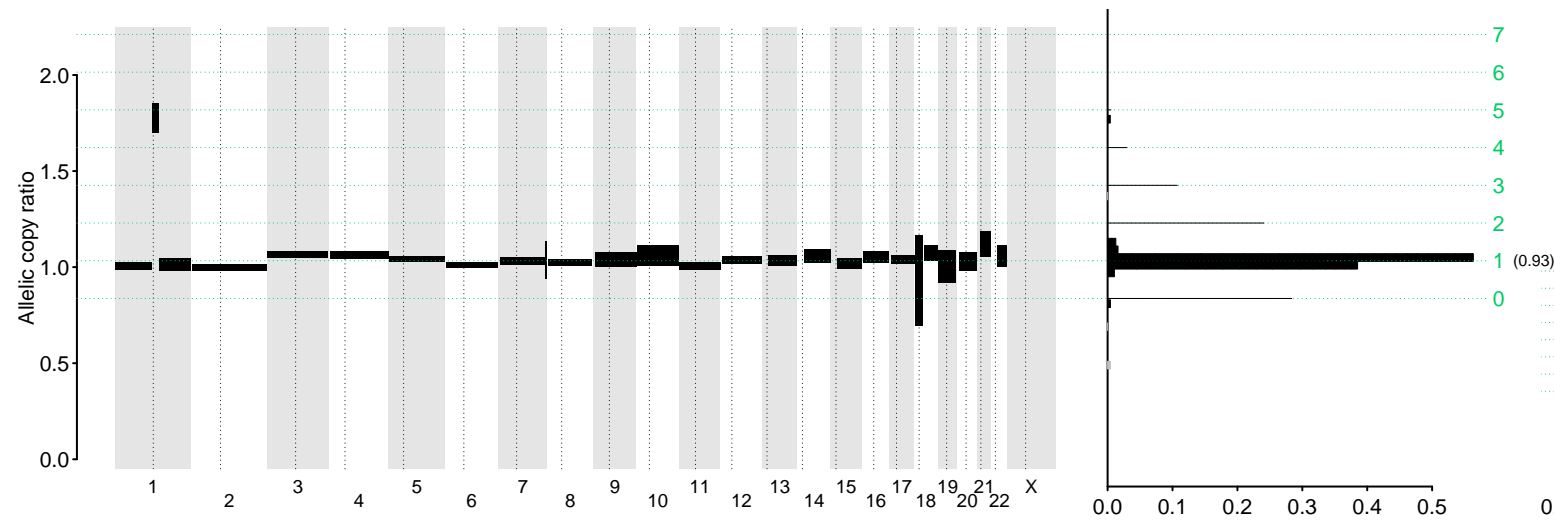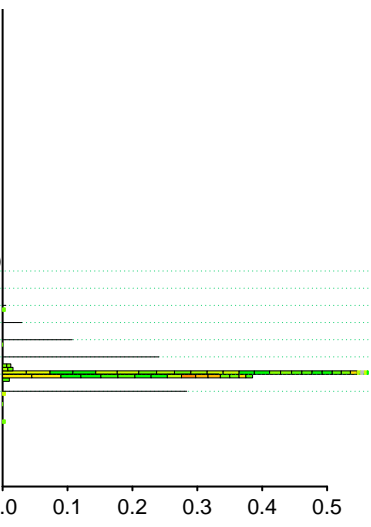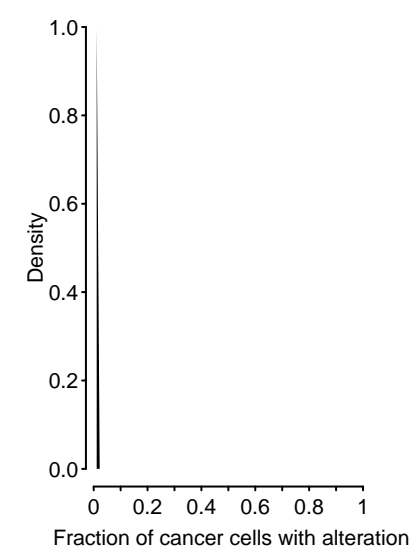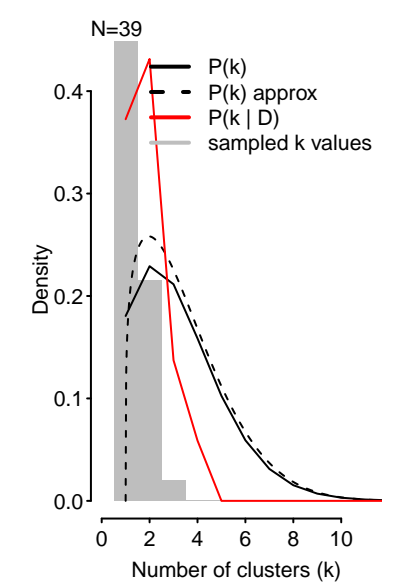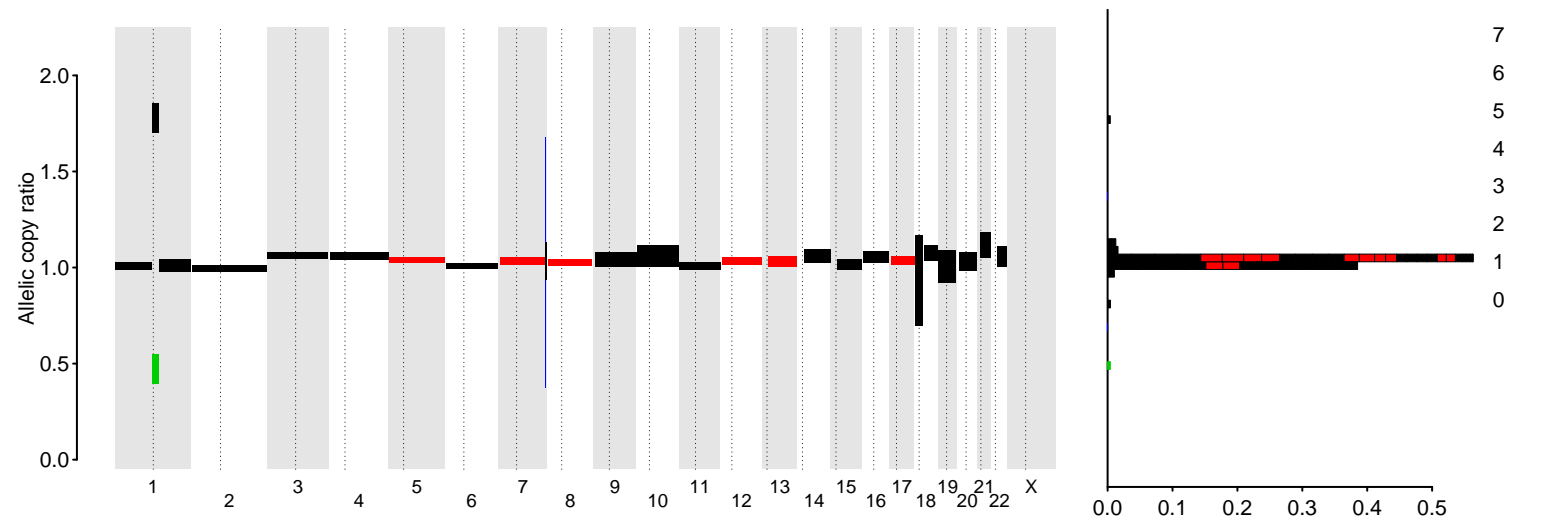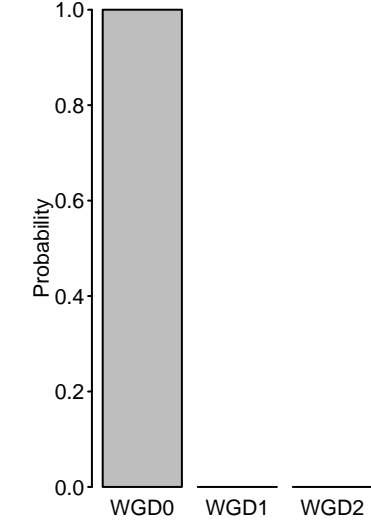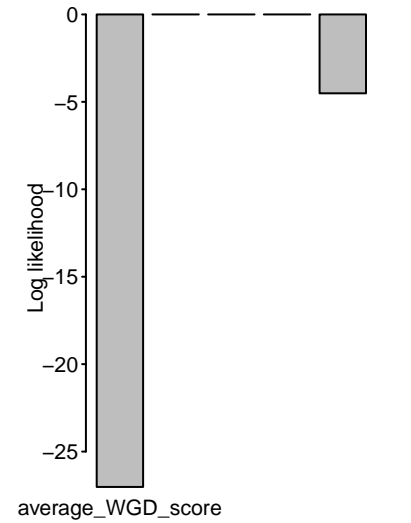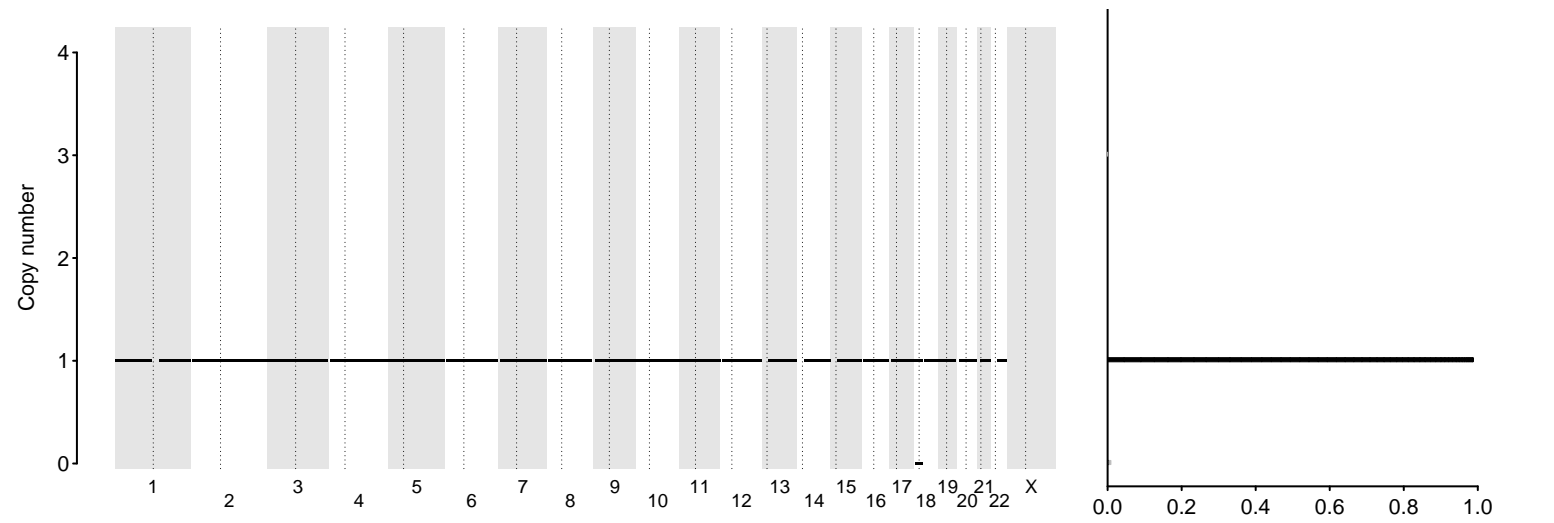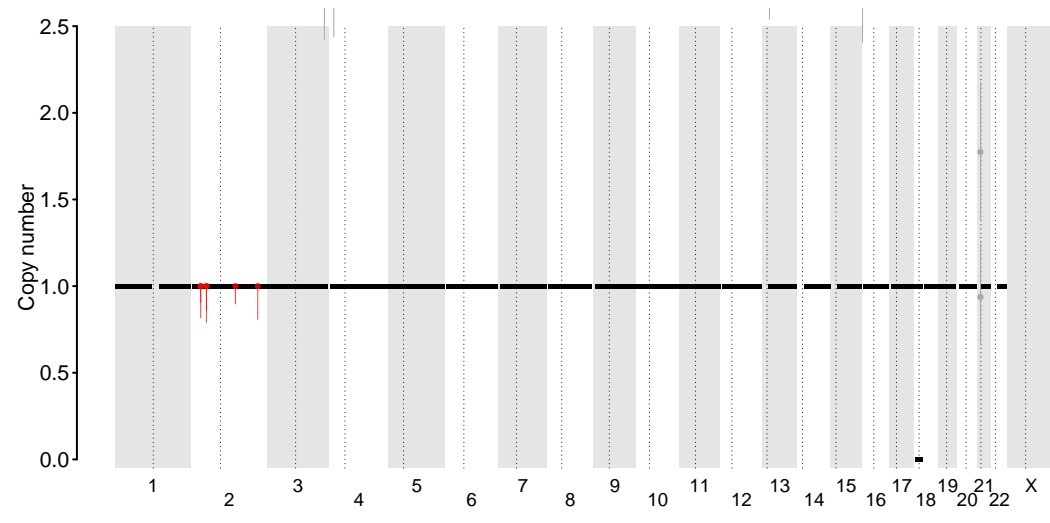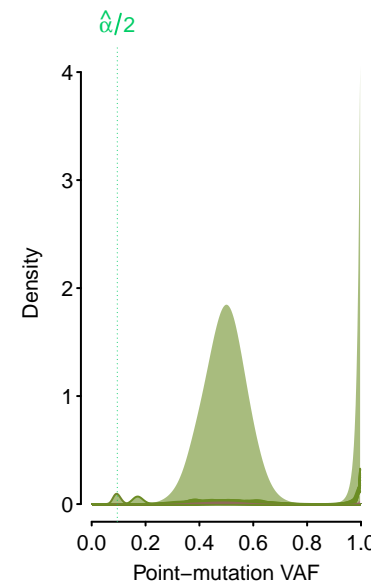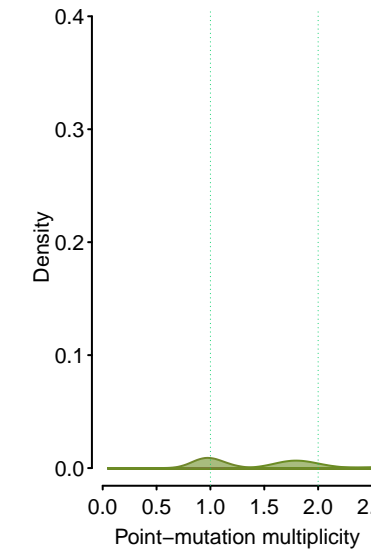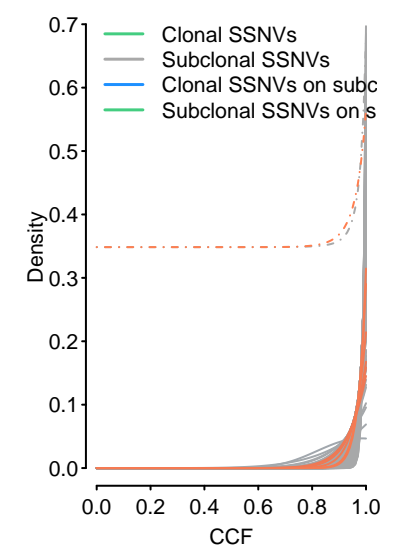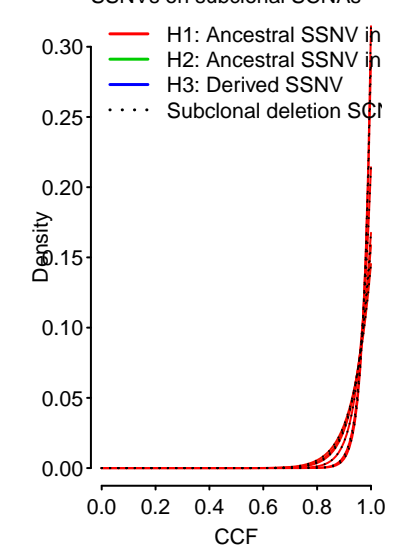

Sample 88

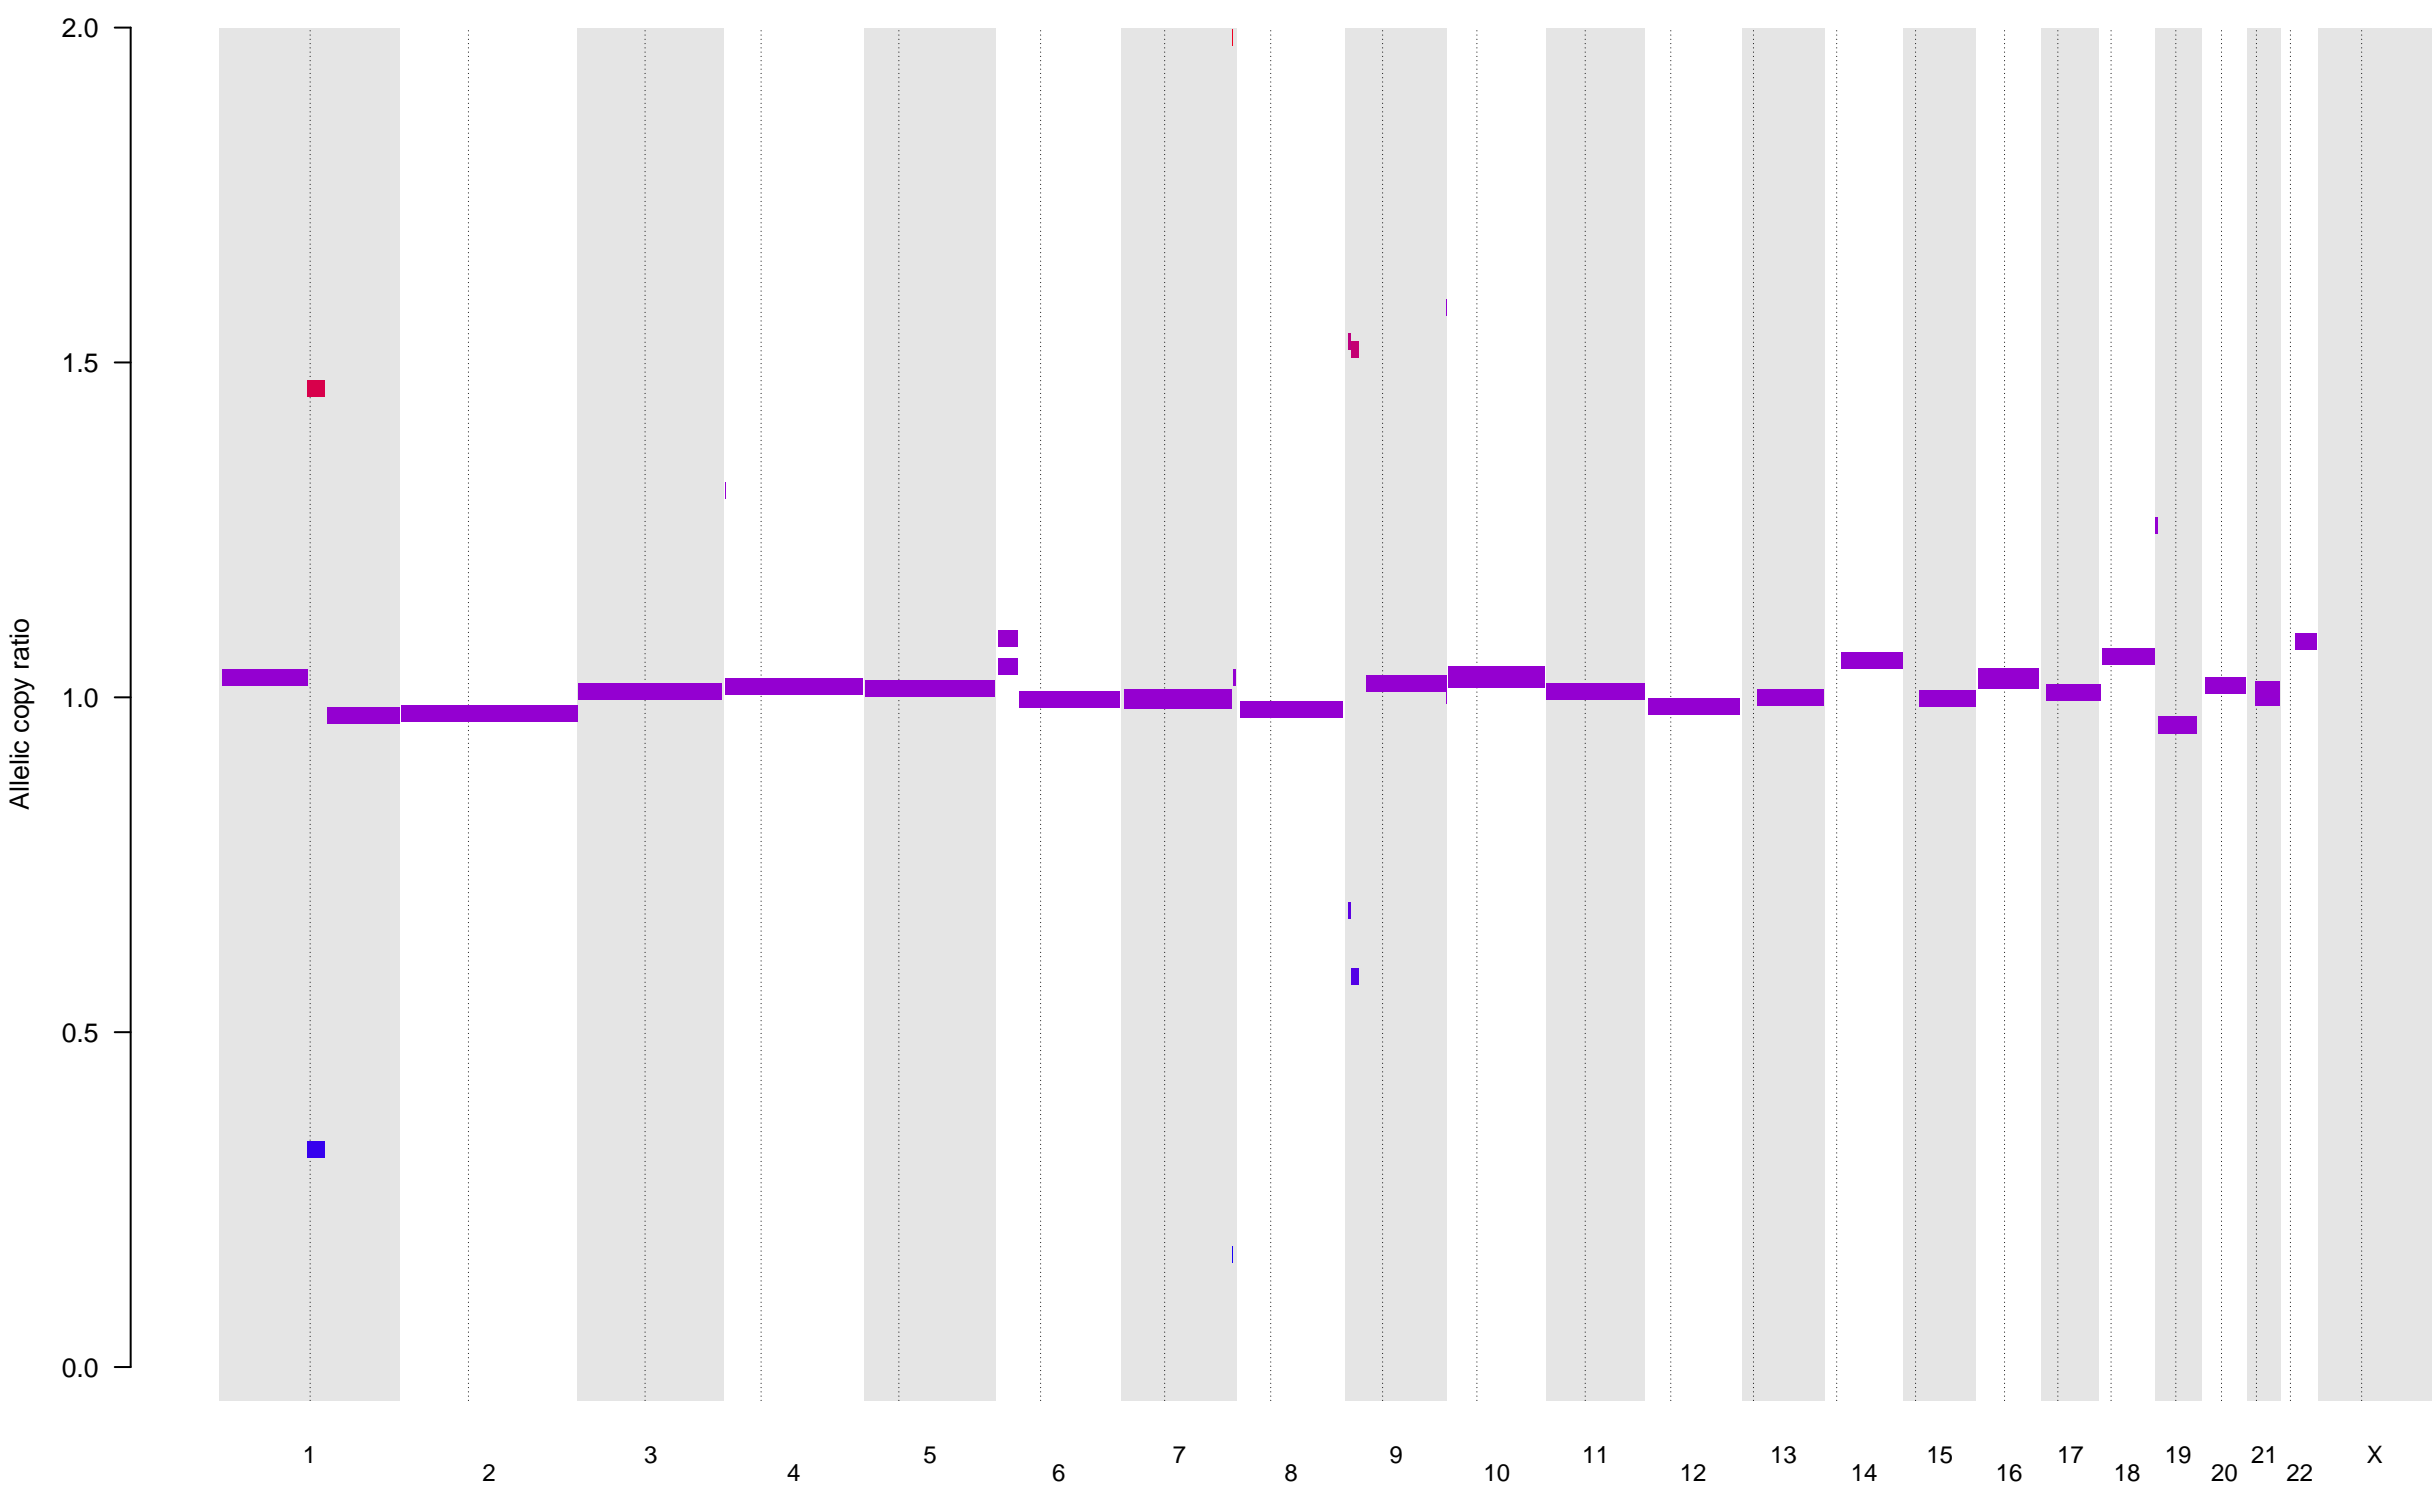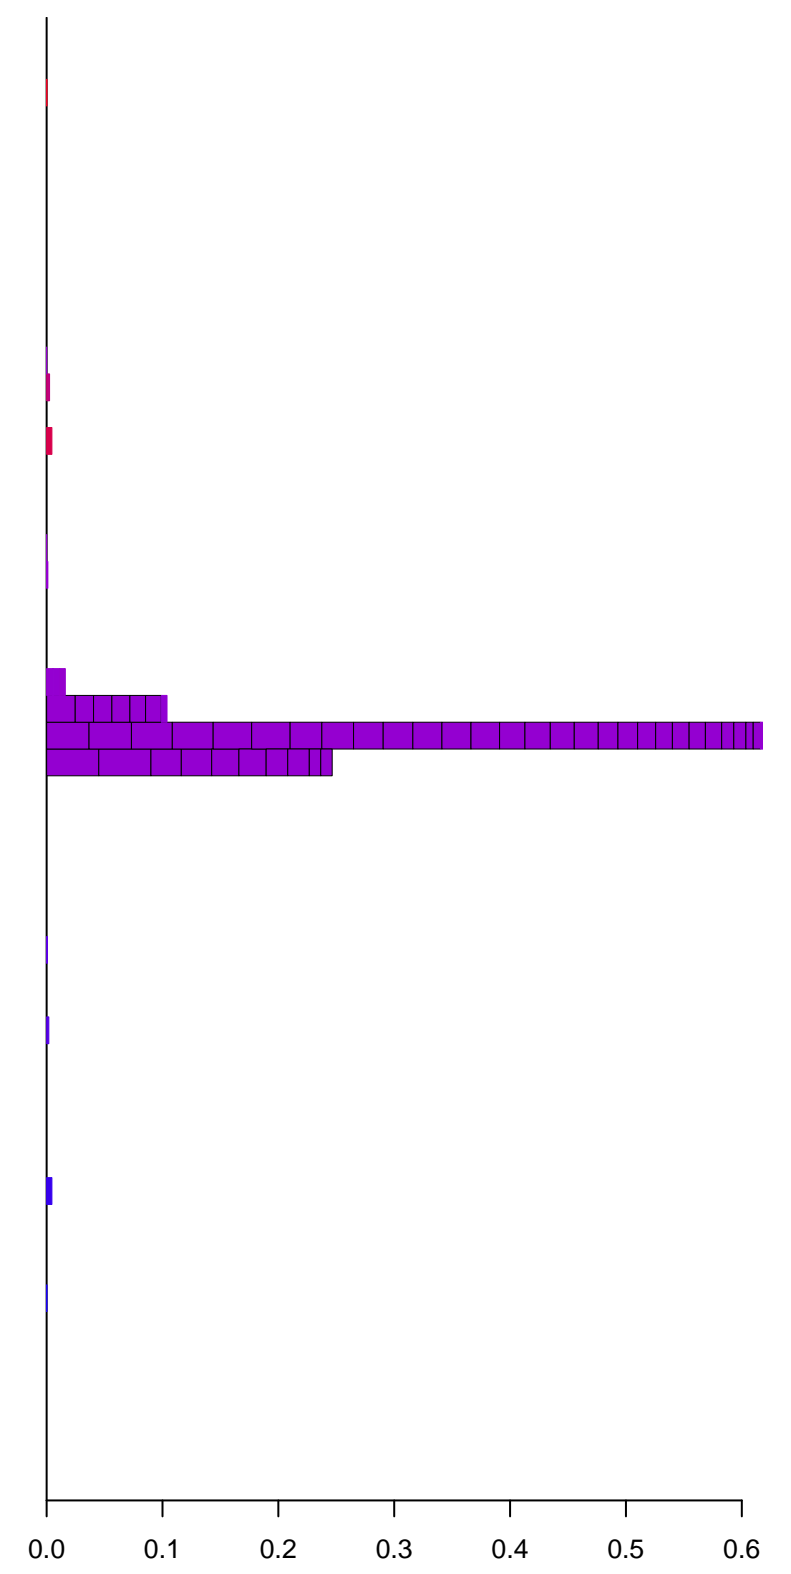

$\text{purity}(\hat{\alpha}) = 0.47$ , ploidy:  $\hat{t} = 1.96$ ,  $\hat{t}_g = 2$   
 $\theta_z = 0.01$ ,  $\theta_Q = 1.363$ , WGD=0  
 SCNA LL = -198.33, SSNV LL = -4125.69, SCNA Ev = -29.60161

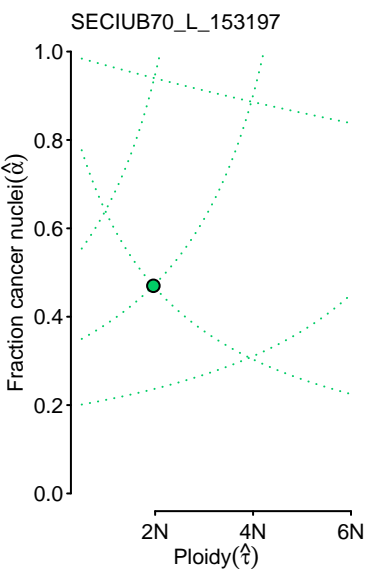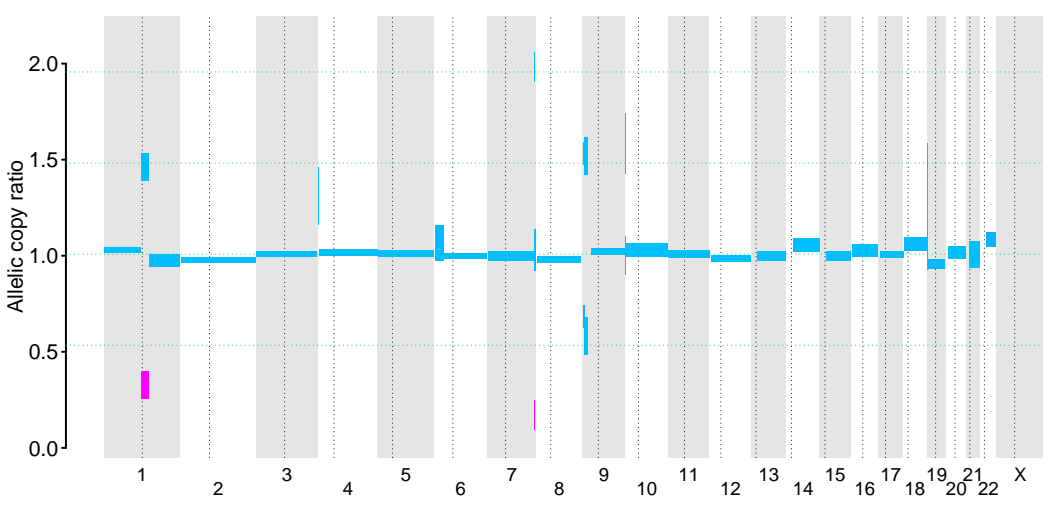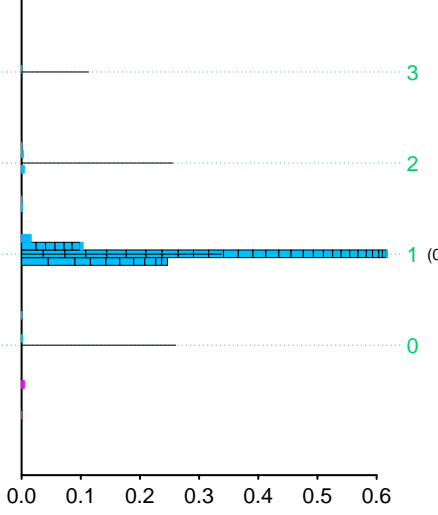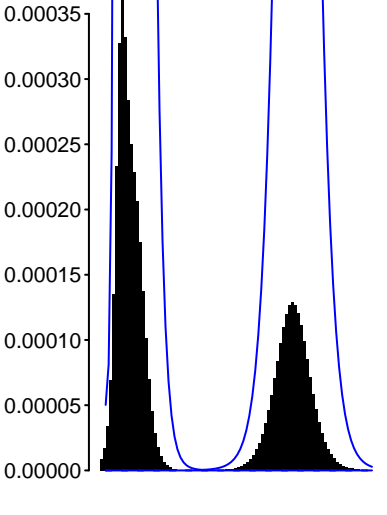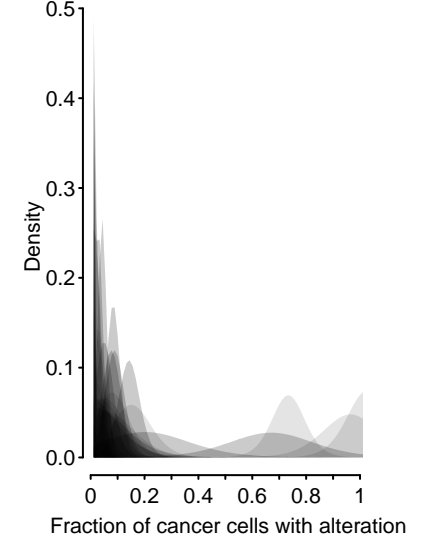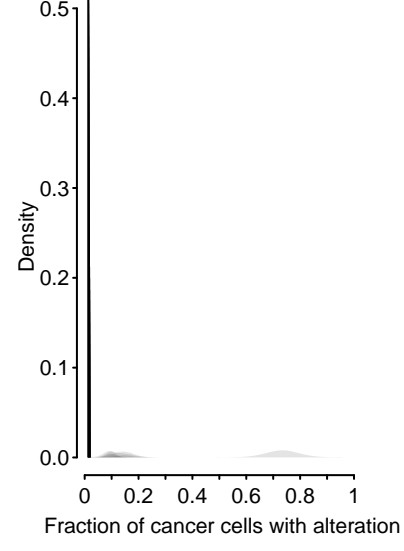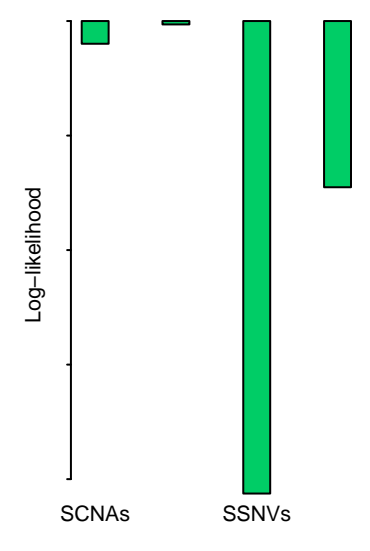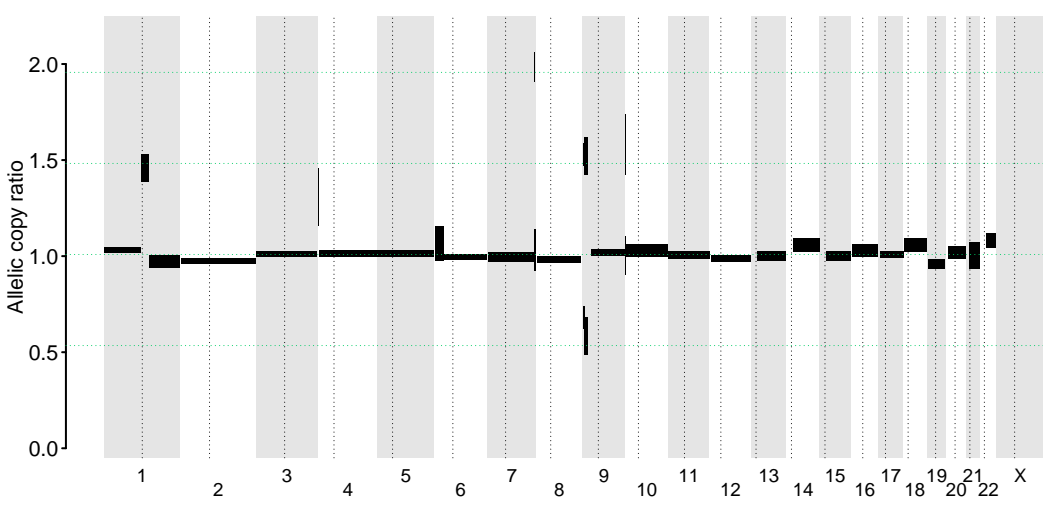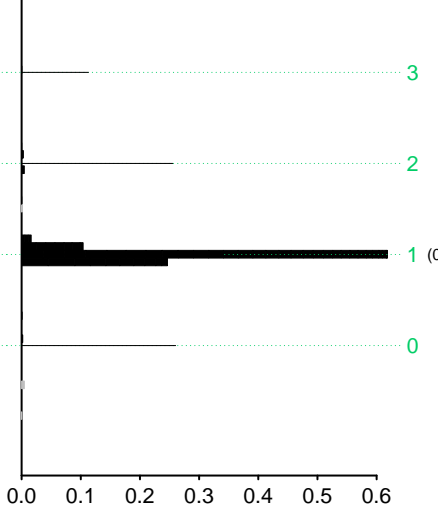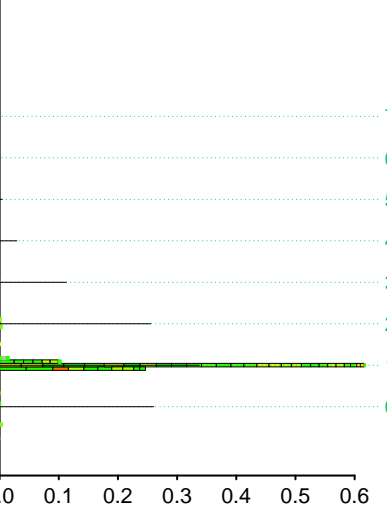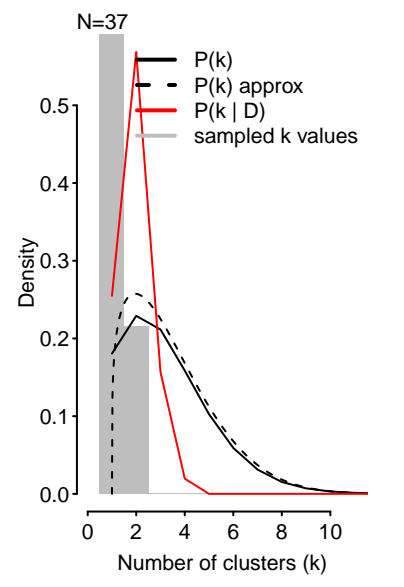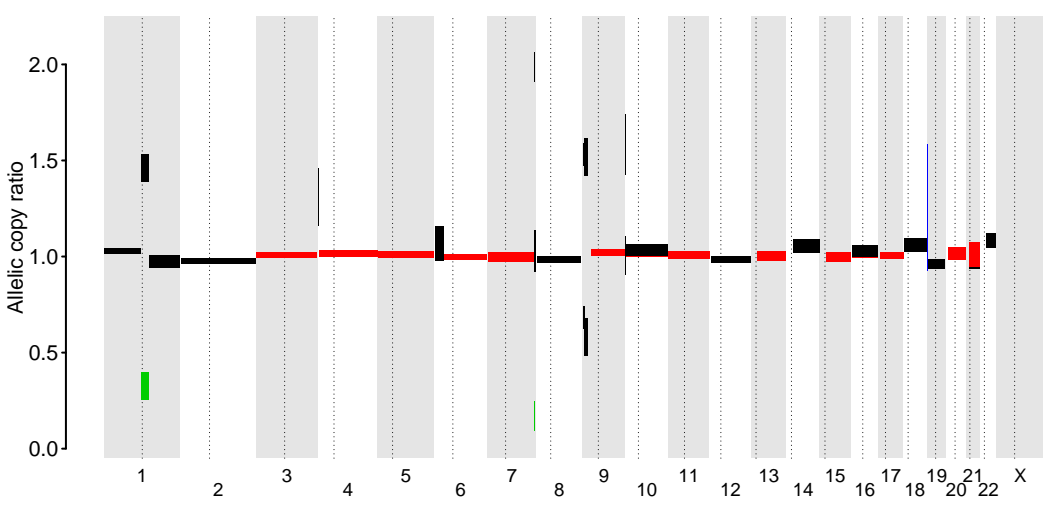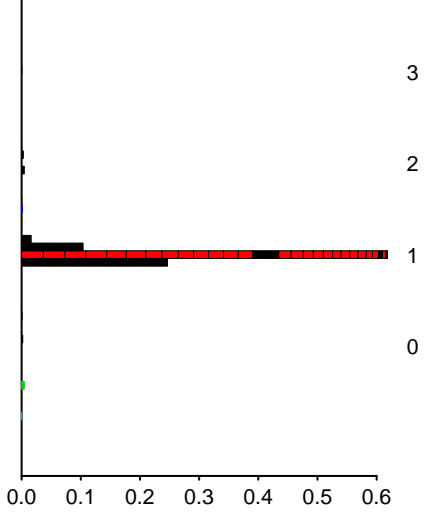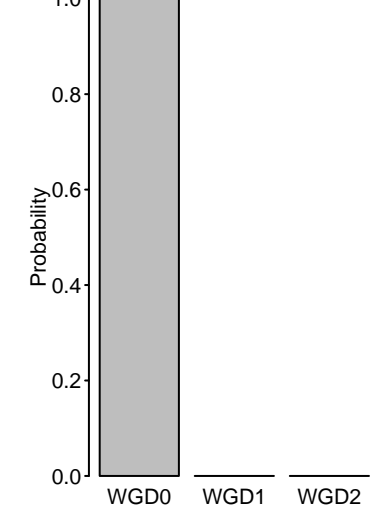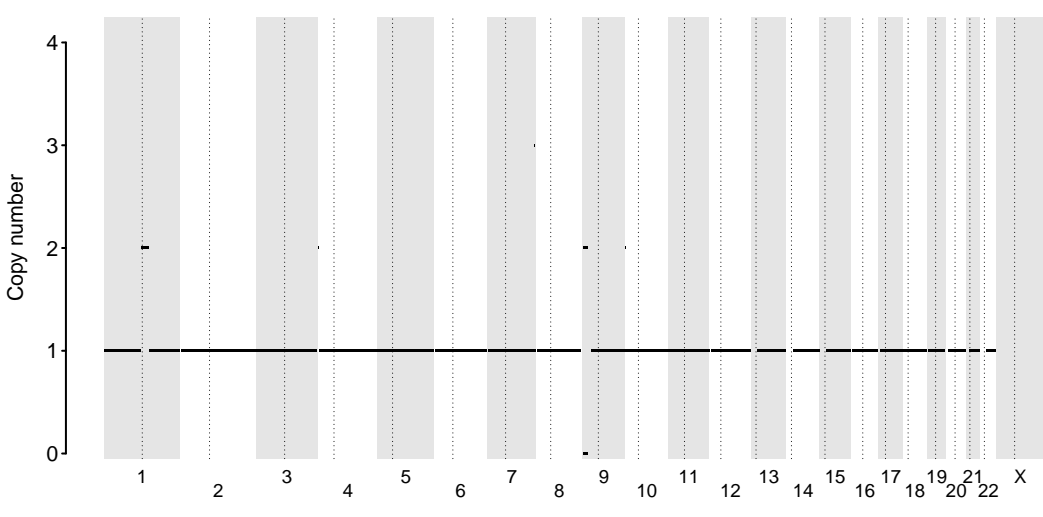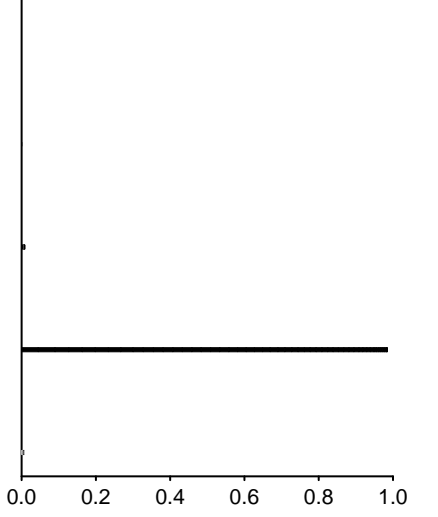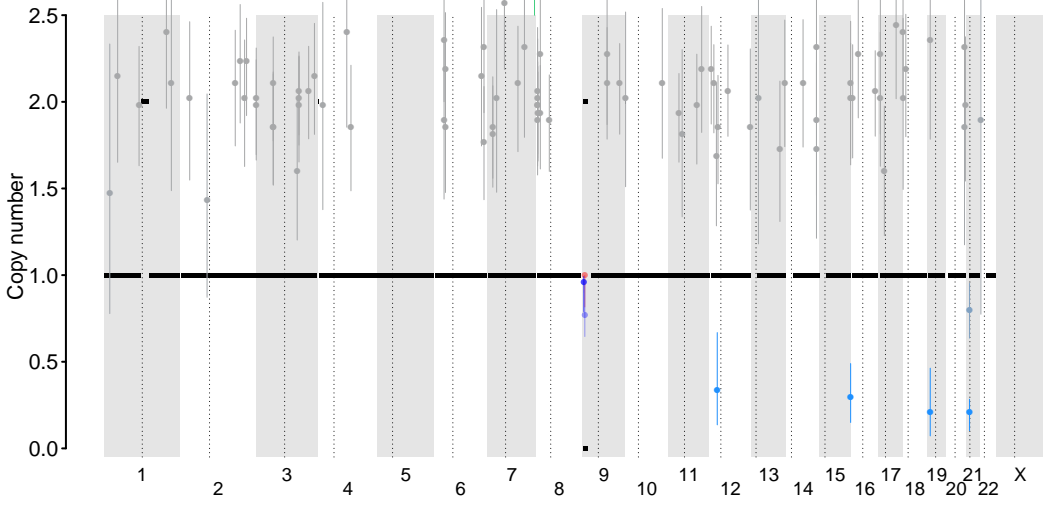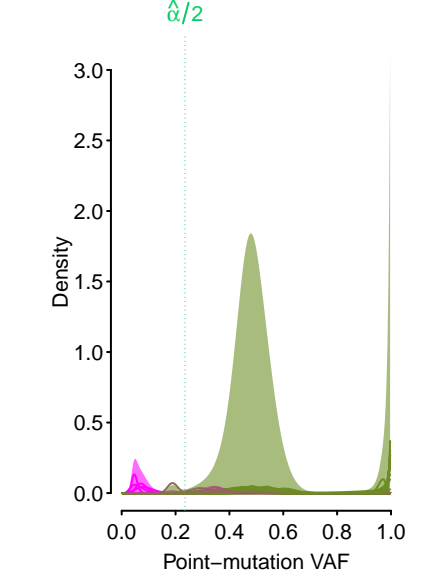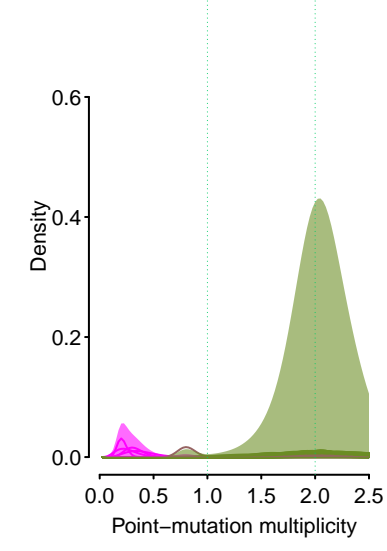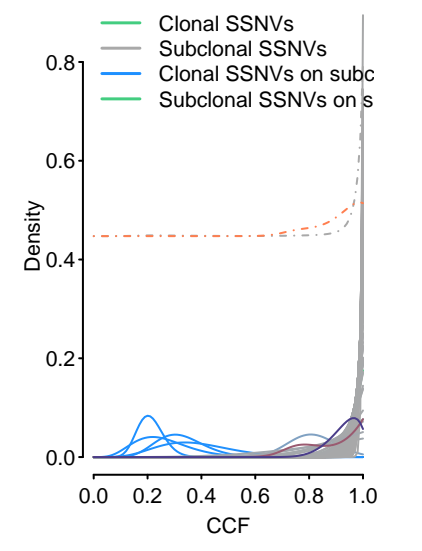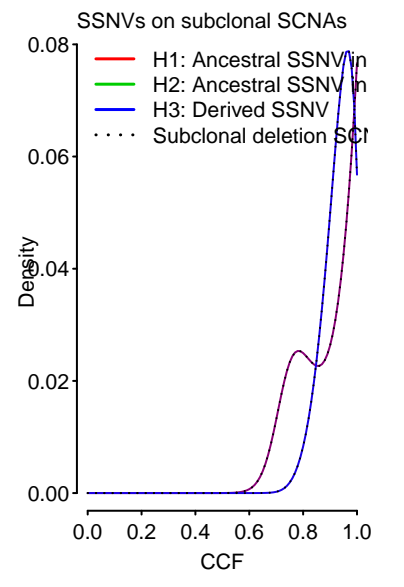

Sample 89

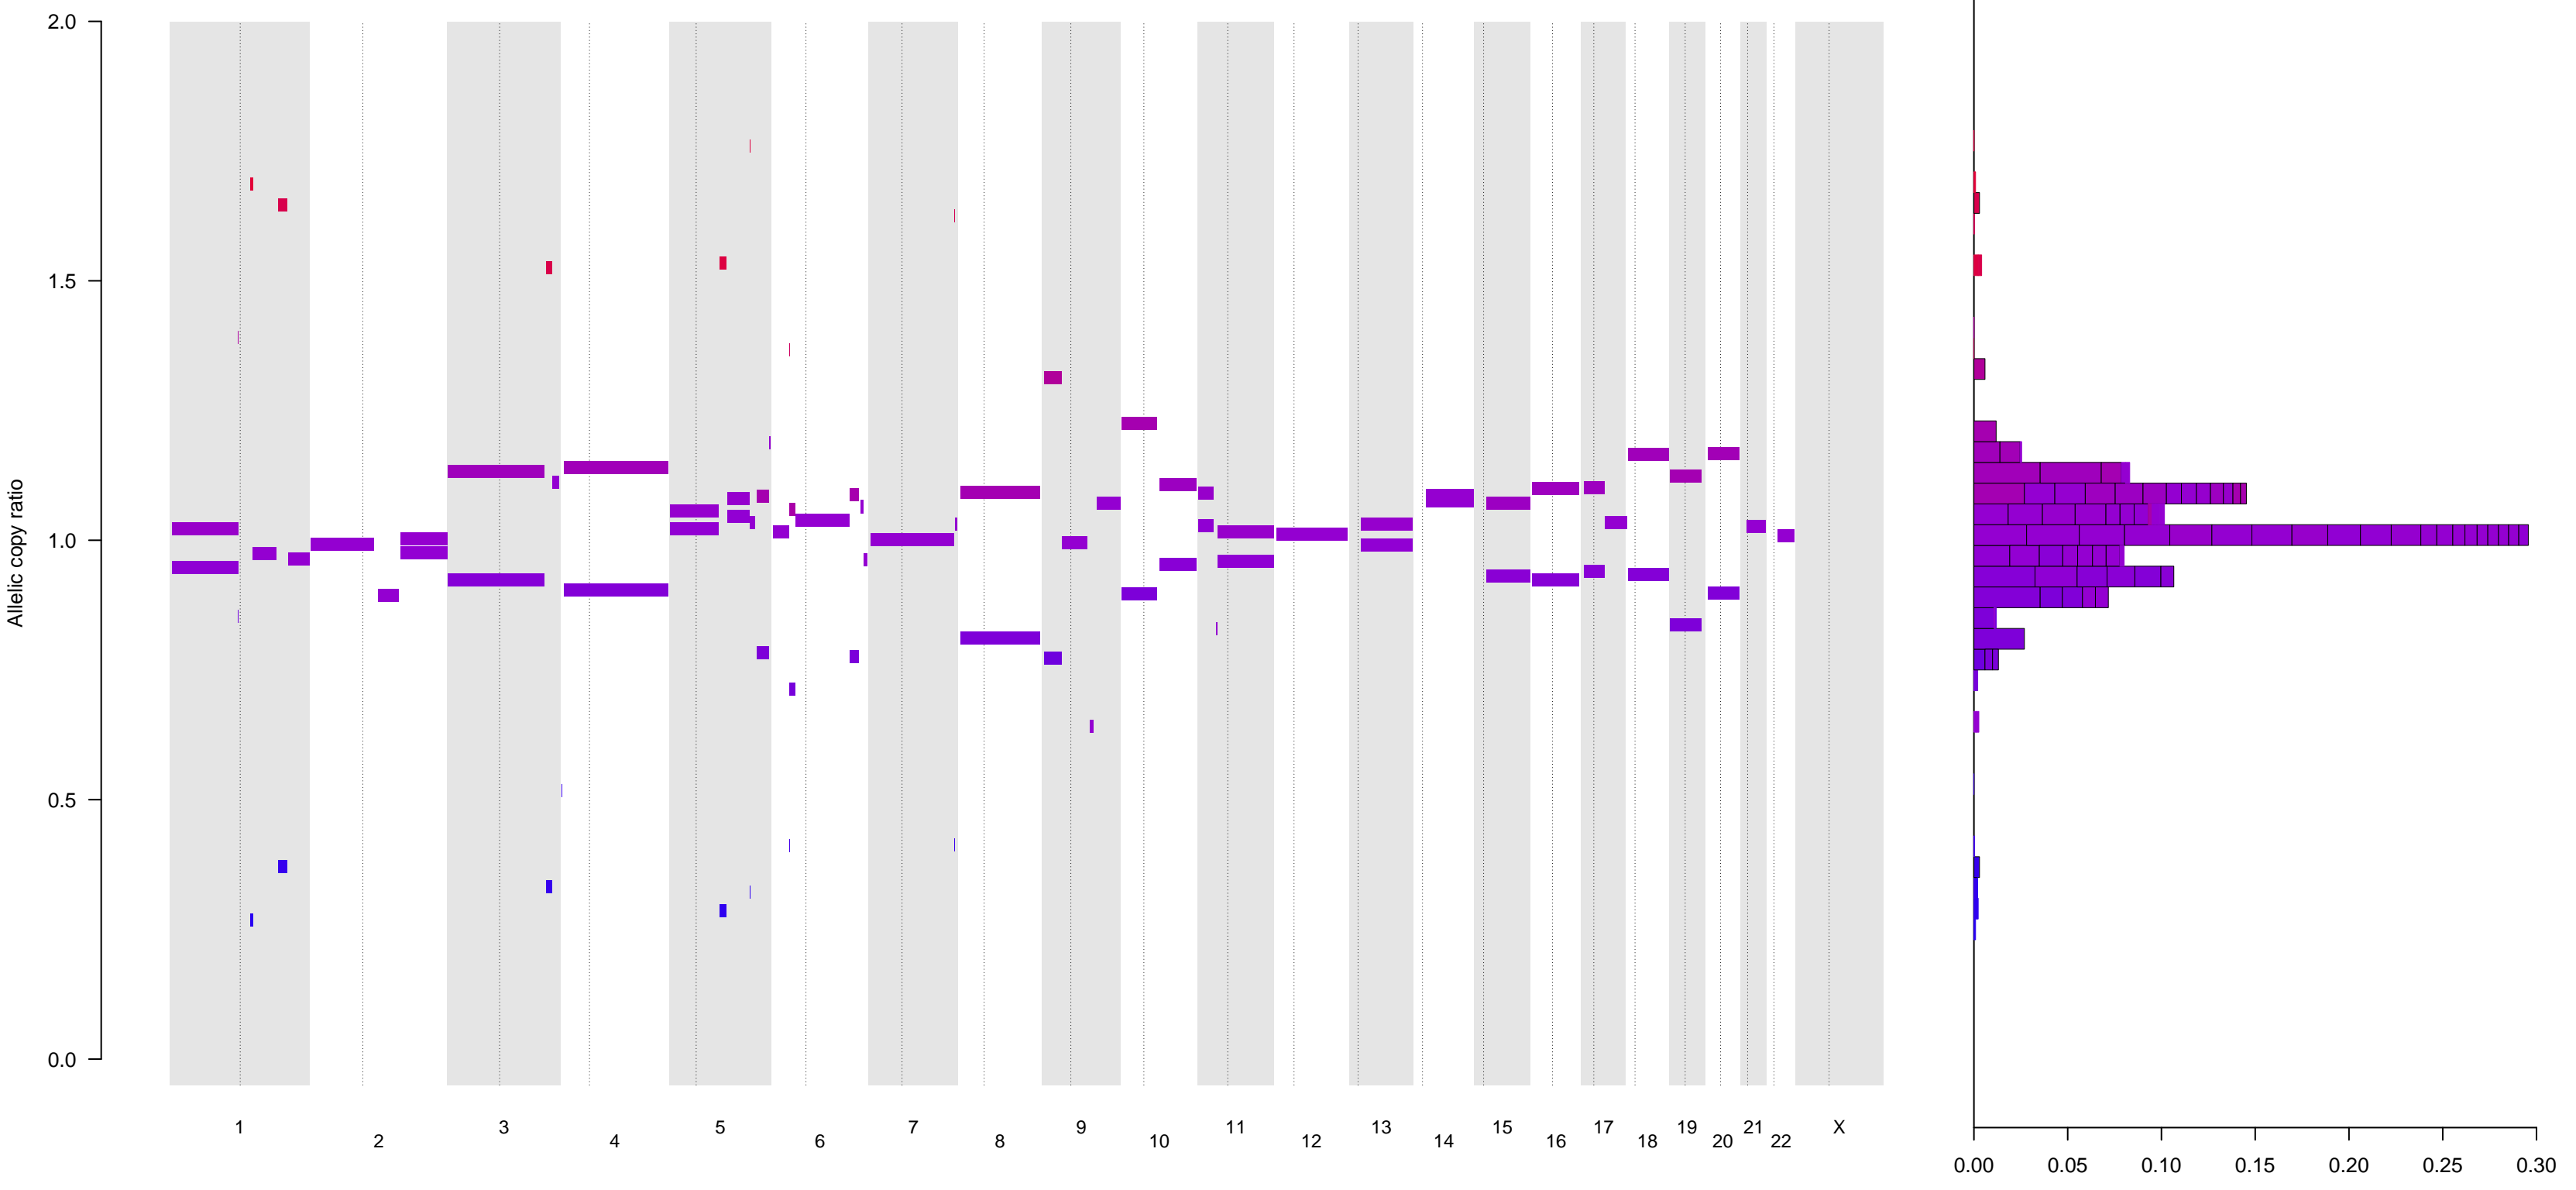

purity( $\hat{\alpha}$ ) = 0.23, ploidy:  $\hat{t} = 1.93$ ,  $\hat{t}_g = 2.09$   
 $\theta_z = 0.25$ ,  $\theta_Q = 1.667$ , WGD=0  
 SCNA LL = -470.86, SSNV LL = -4805.85, SCNA Ev = -101.1941

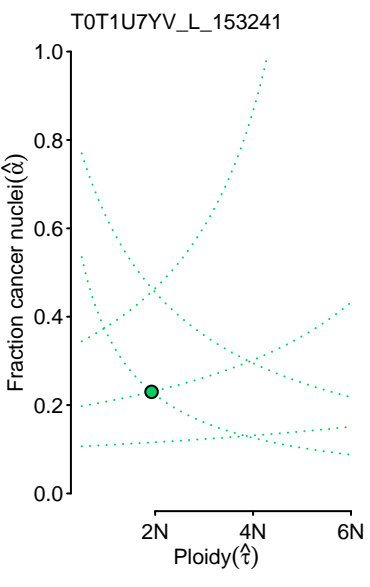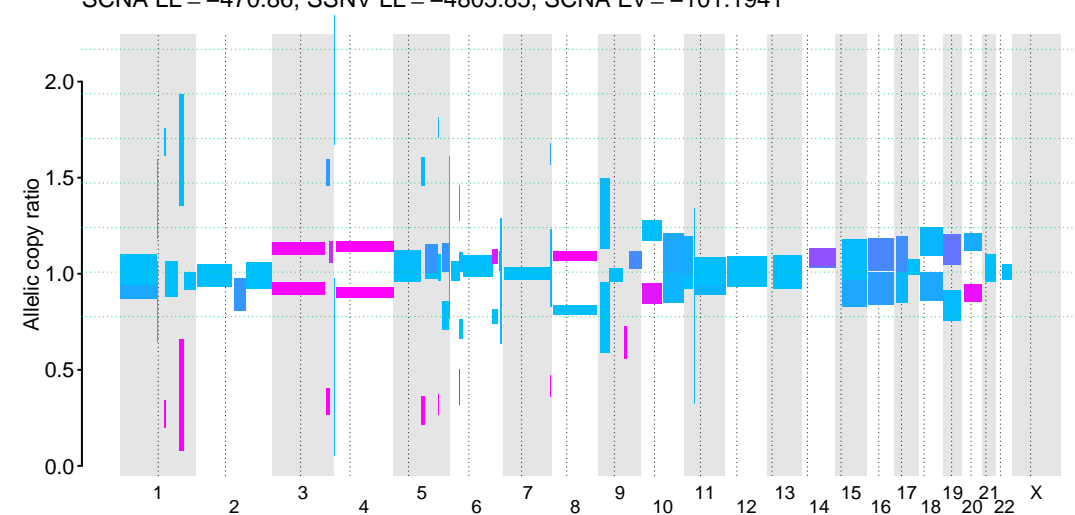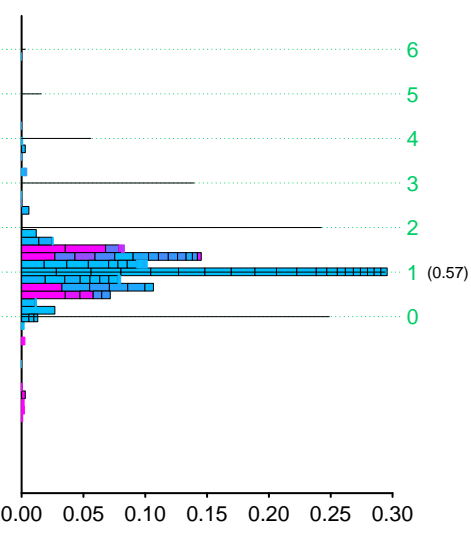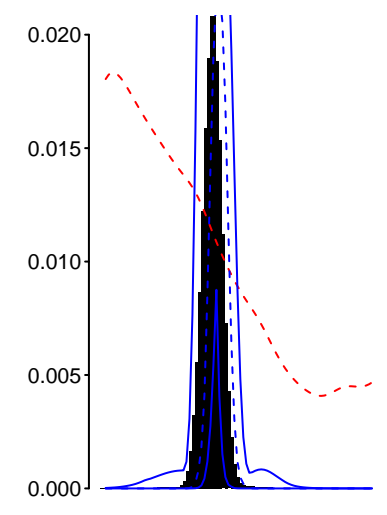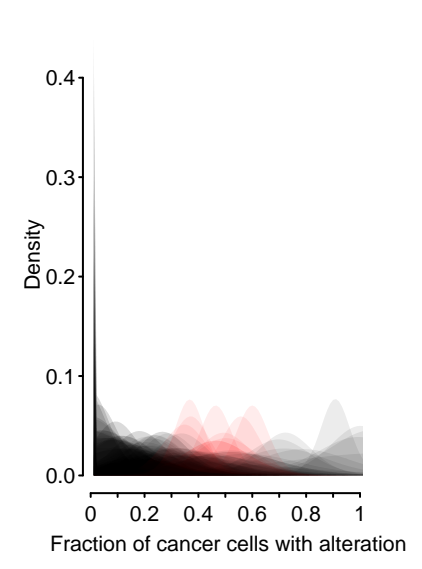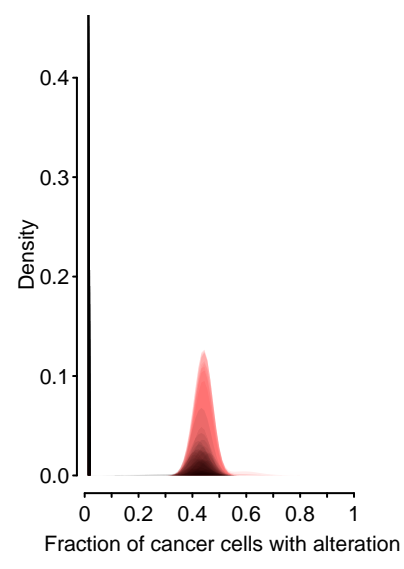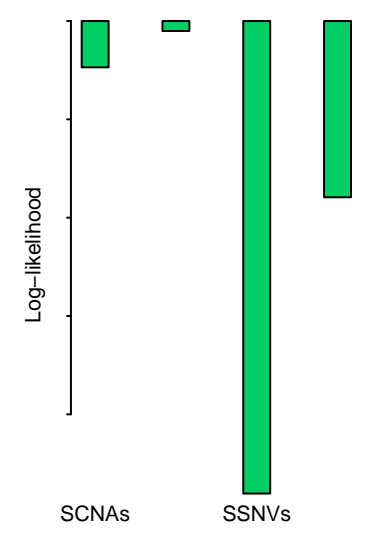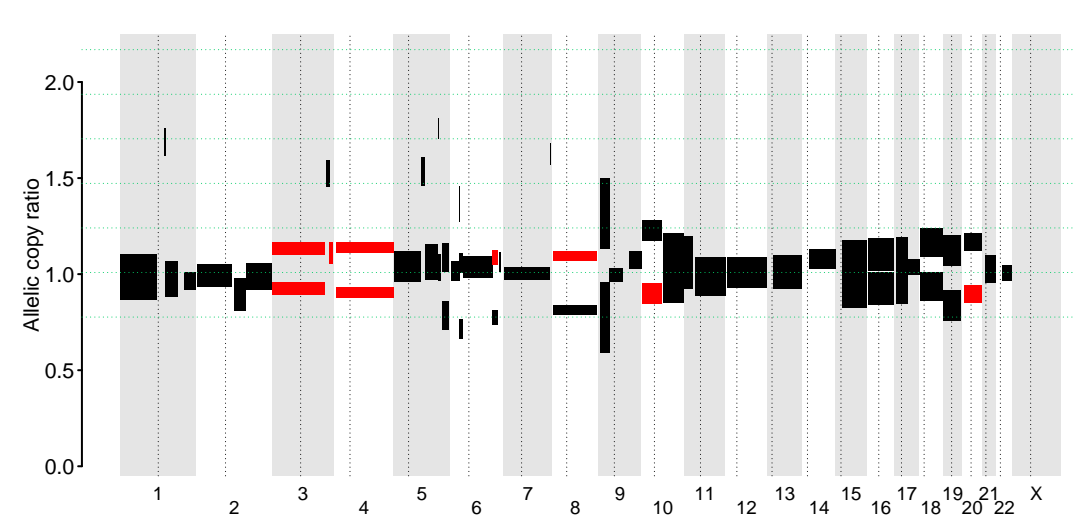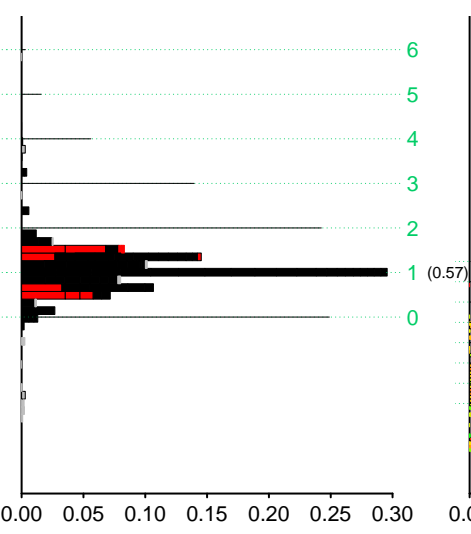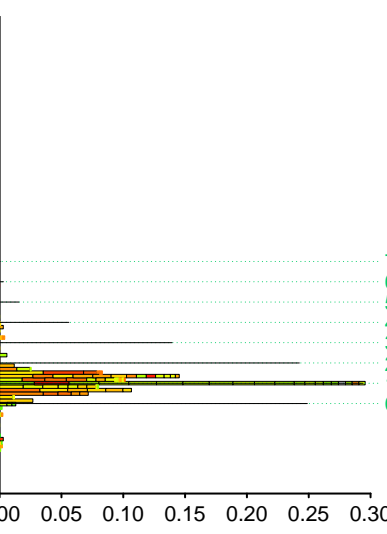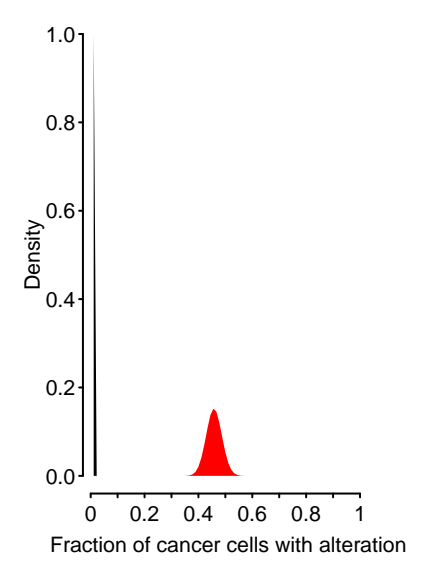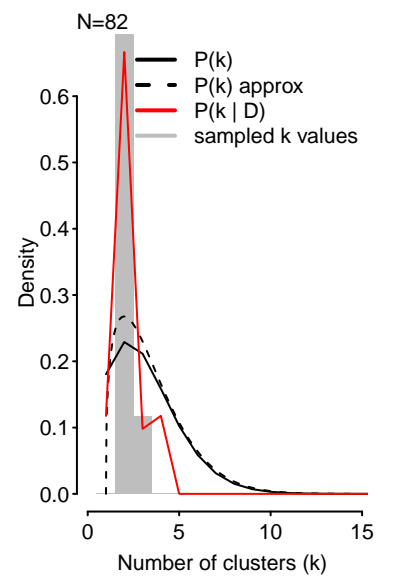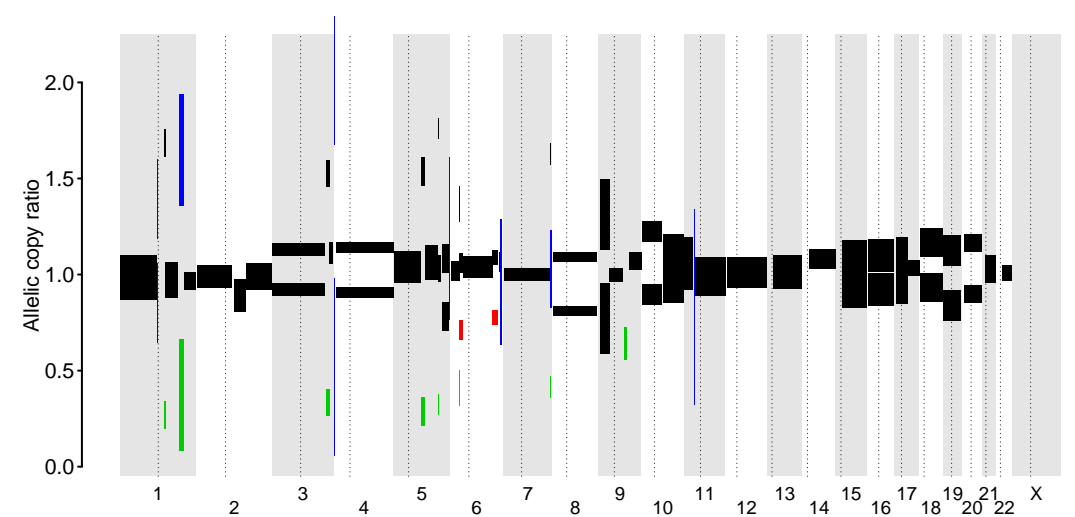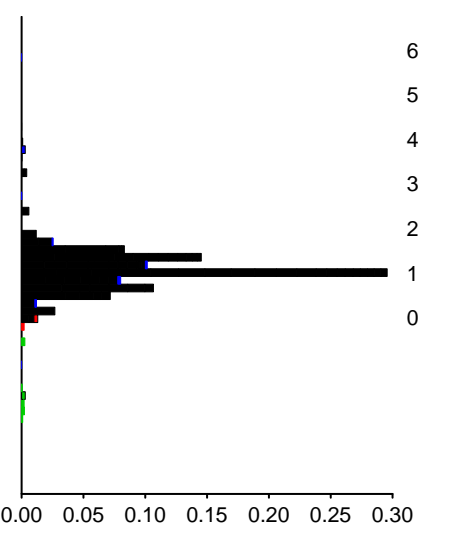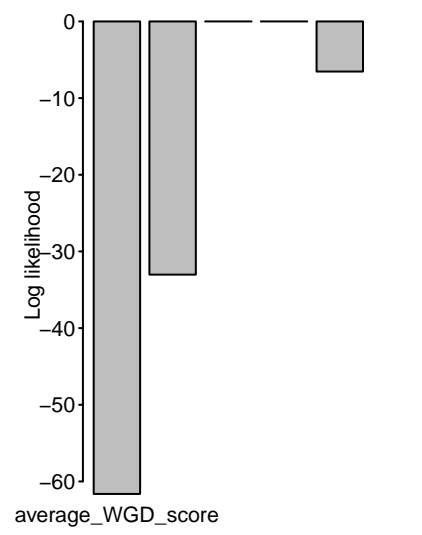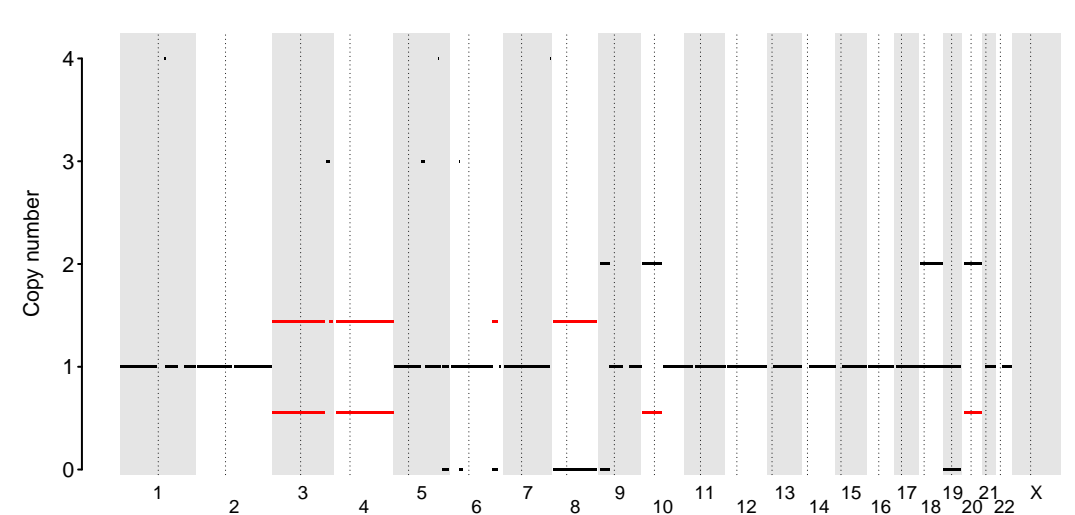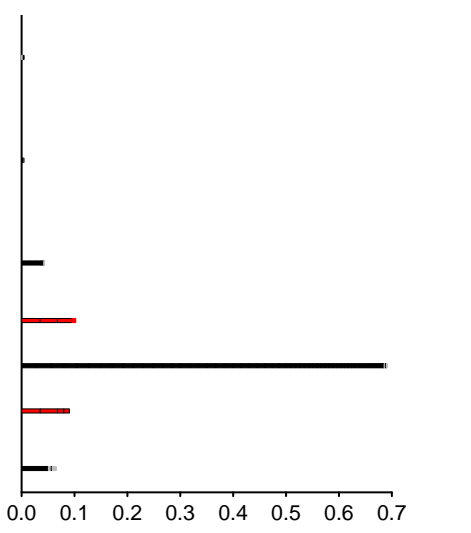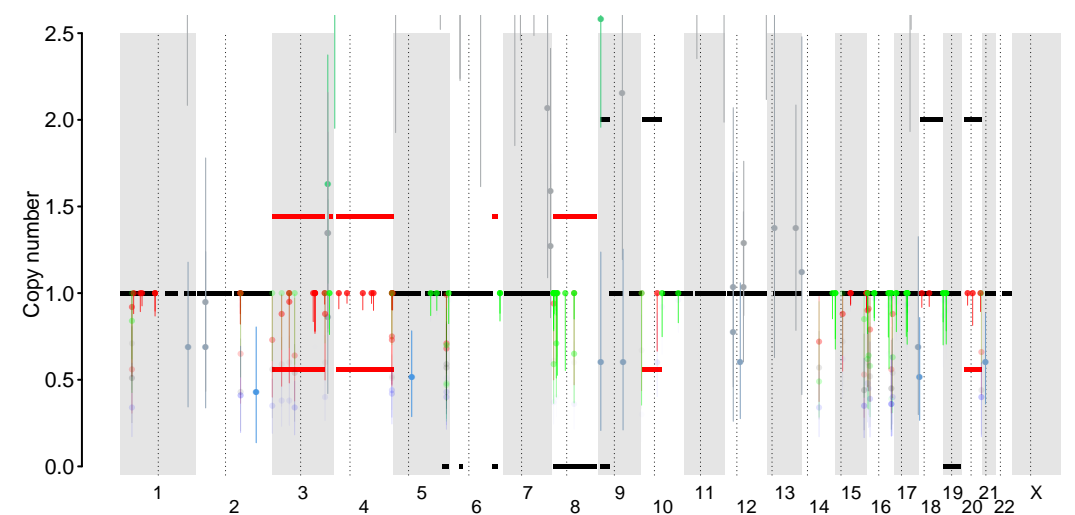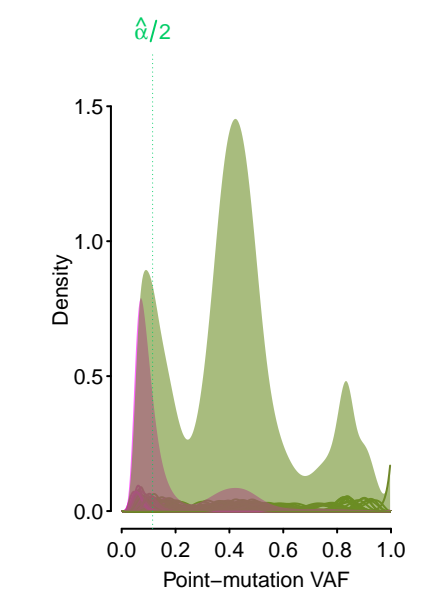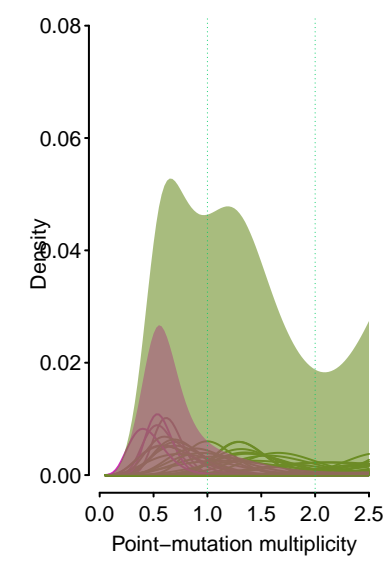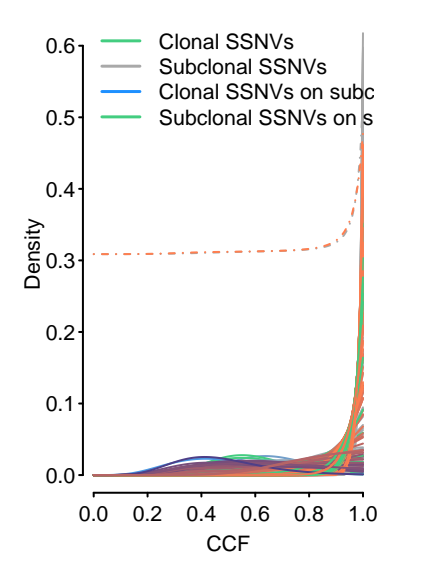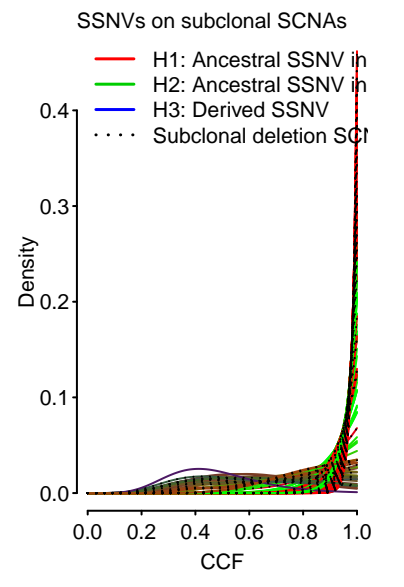

Sample 90

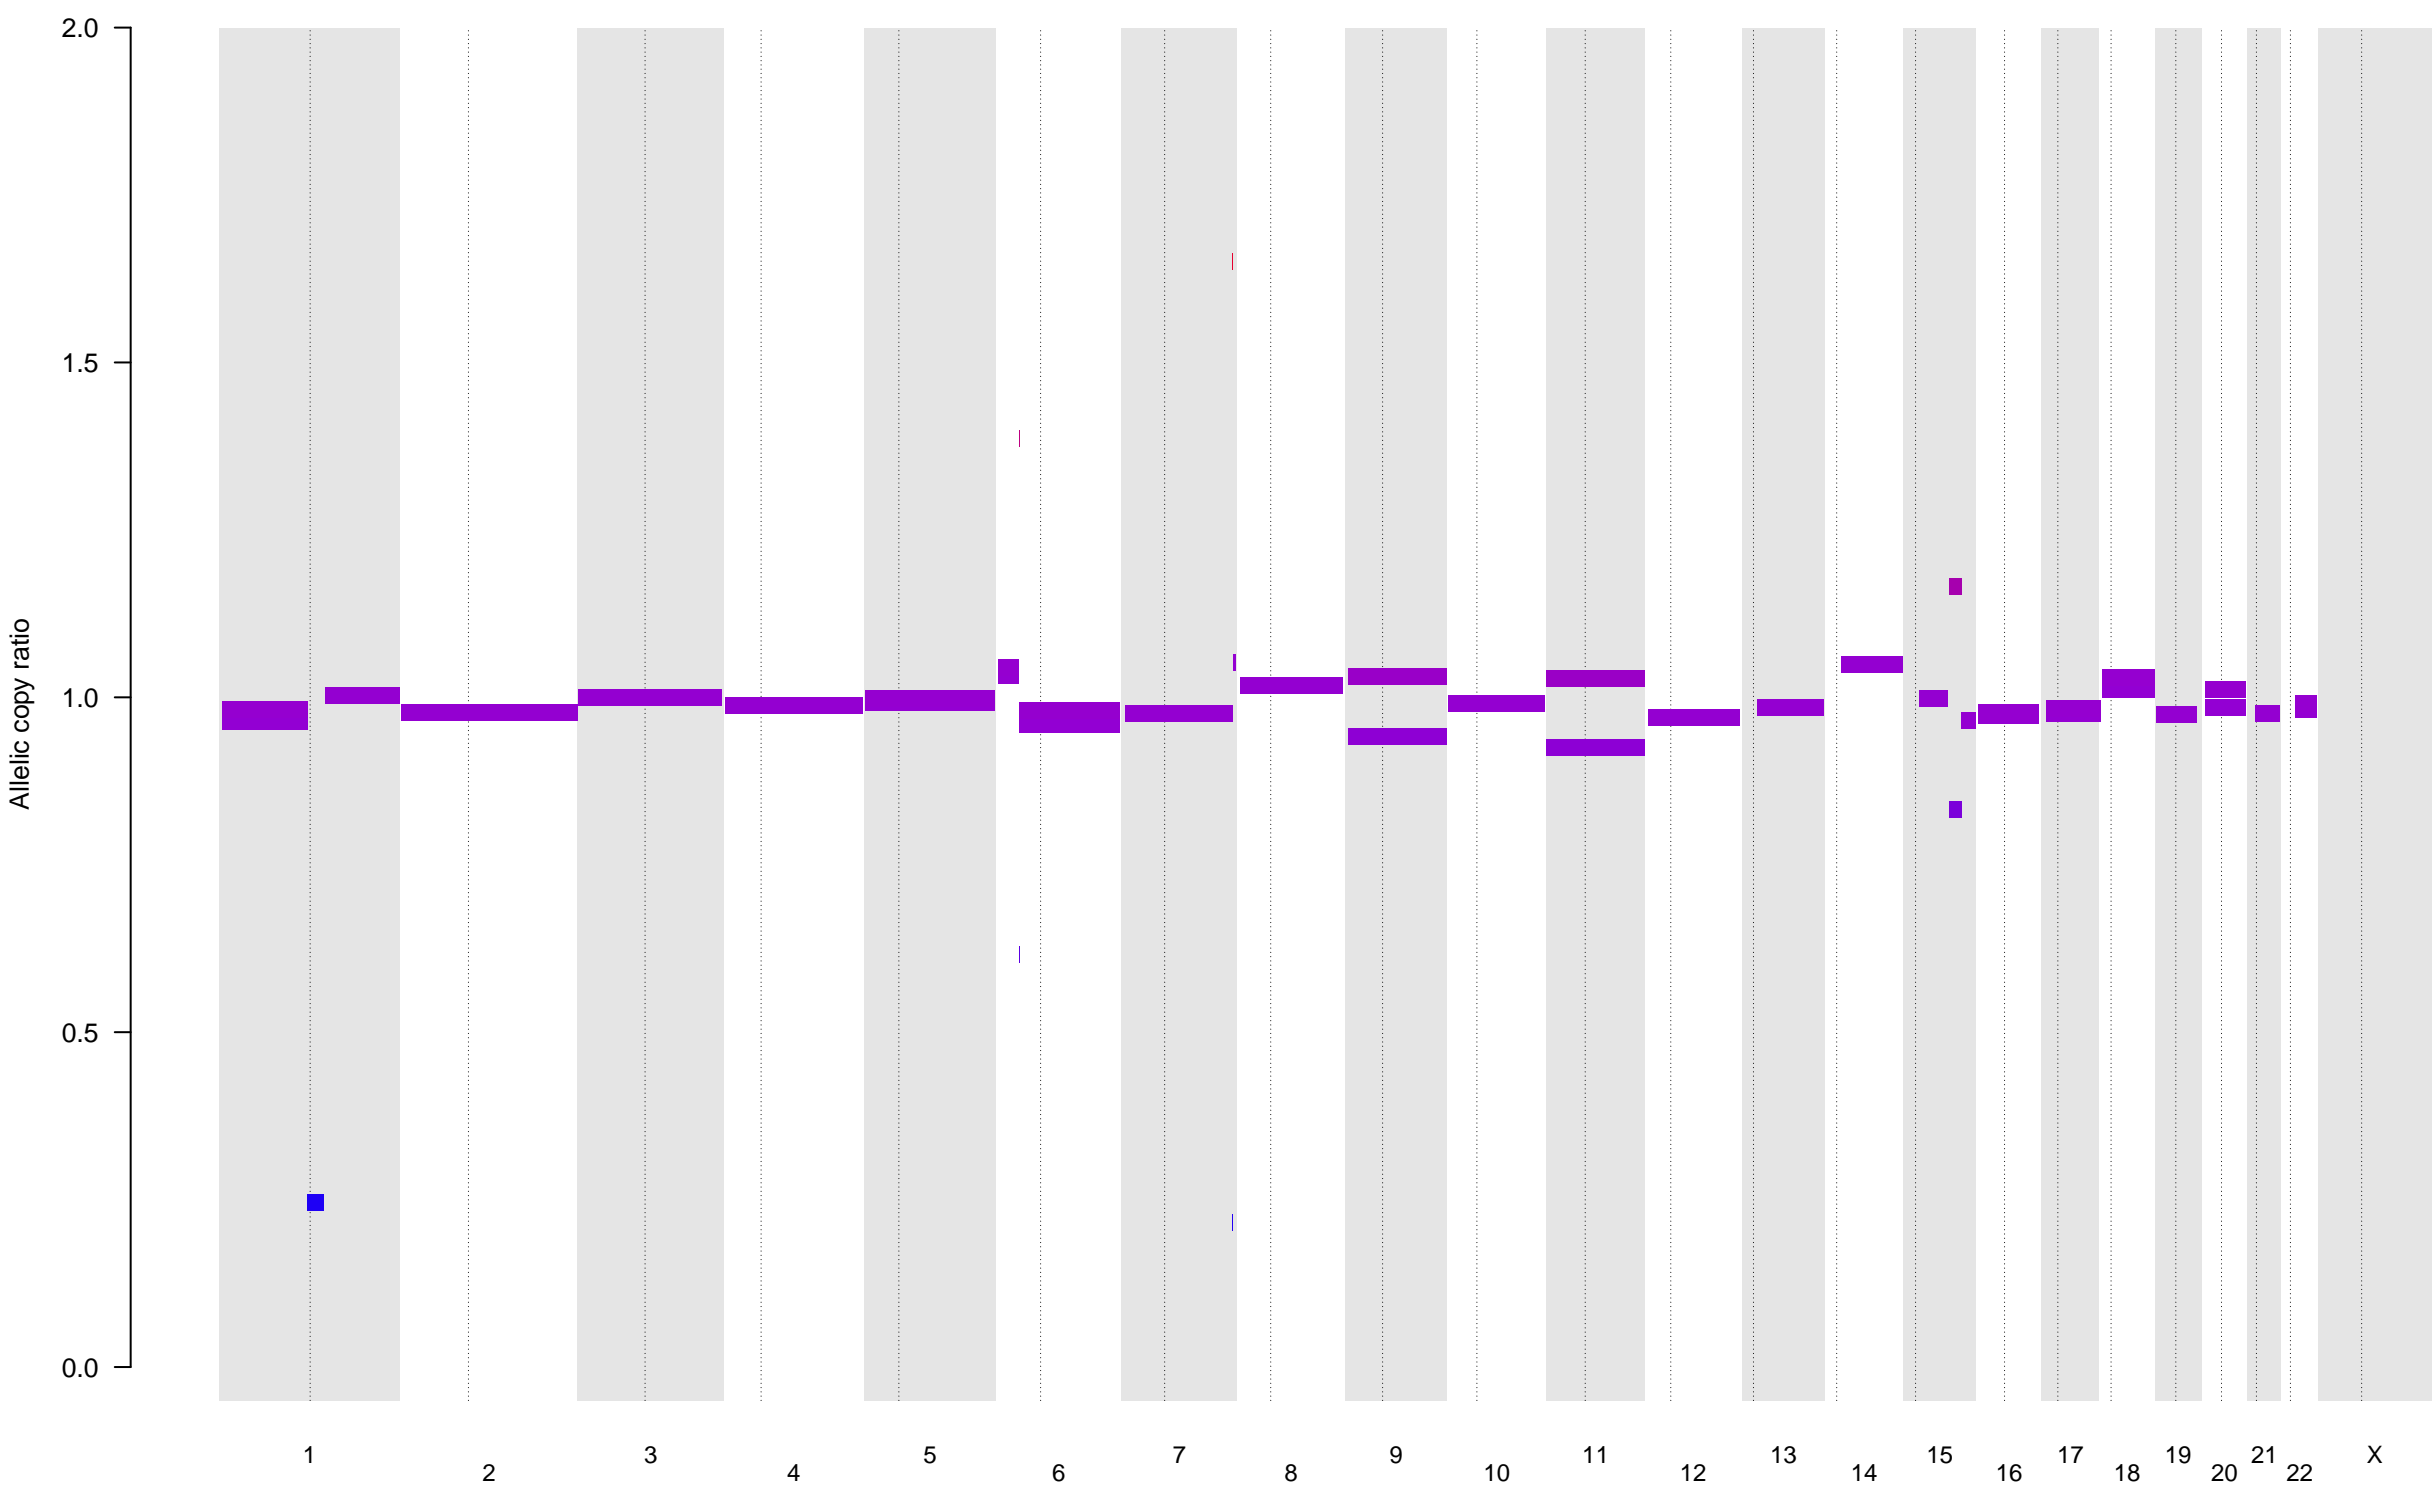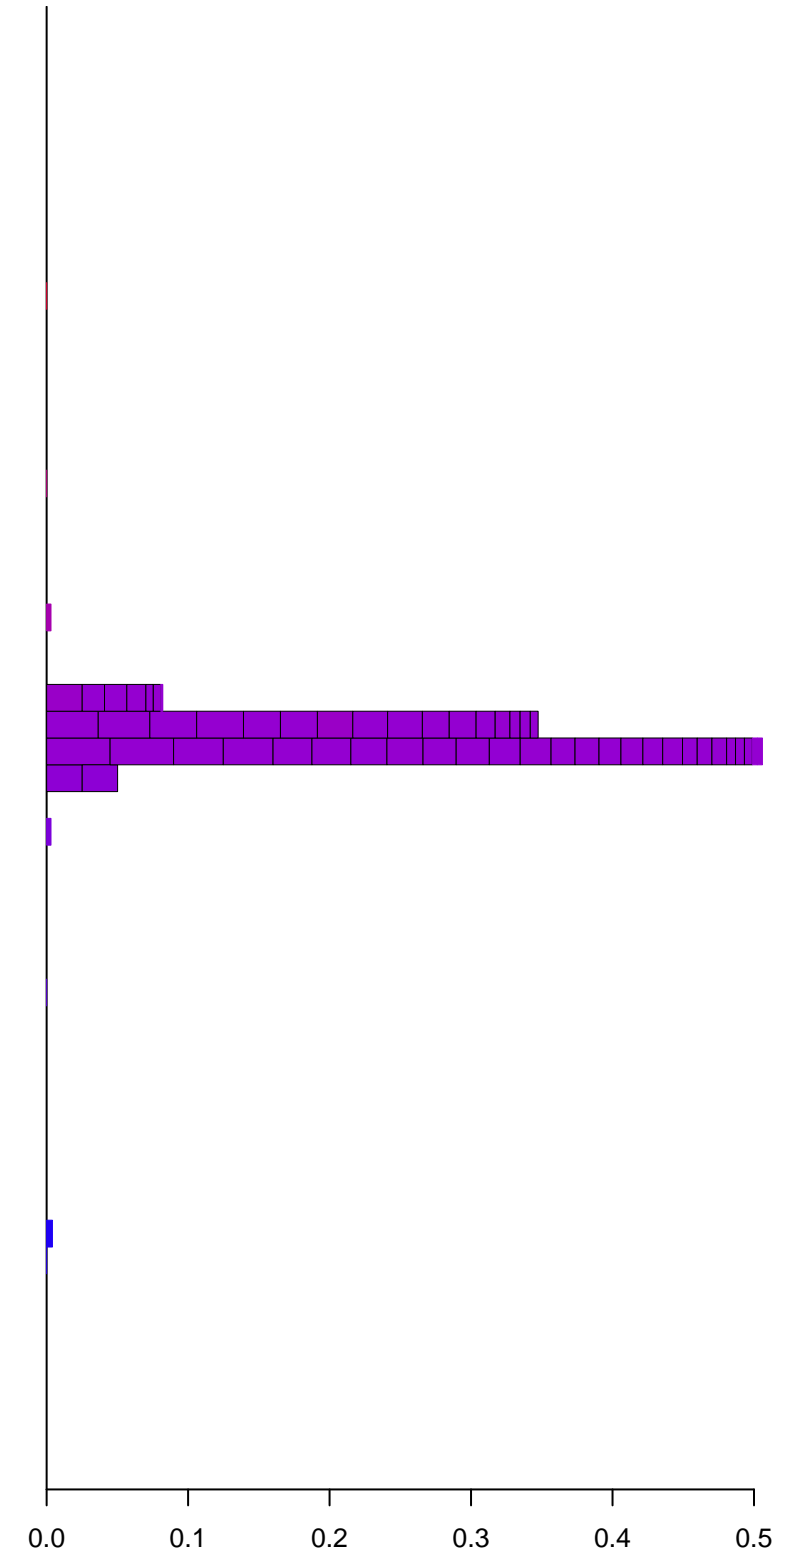



$\hat{purity}(\hat{\alpha}) = 0.17$ , ploidy:  $\hat{t} = 2.19$ ,  $\hat{t}_g = 2.03$   
 $\hat{\theta}_z = 0.01$ ,  $\hat{\theta}_a = 1.409$ , WGD=0  
 SCNA LL = -211.57, SSNV LL = -7513.96, SCNA Ev = -29.60161

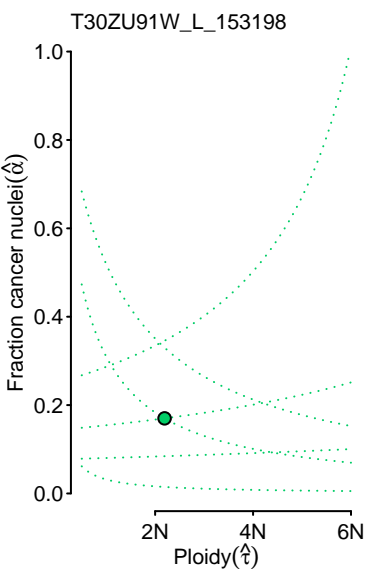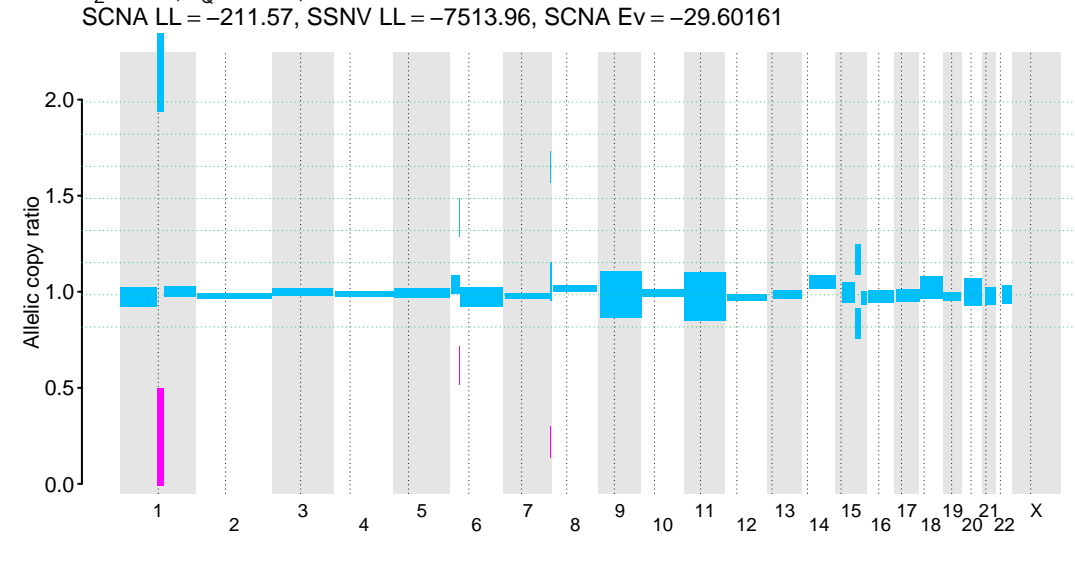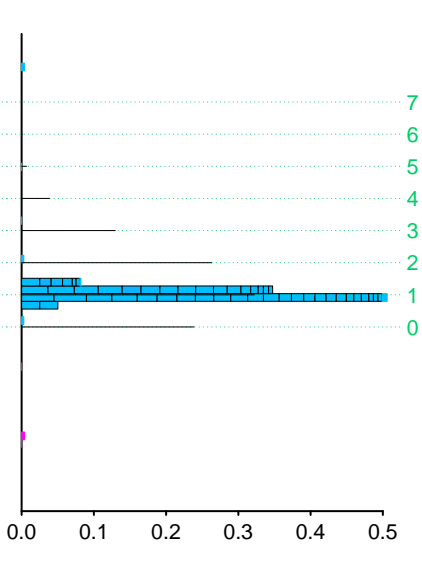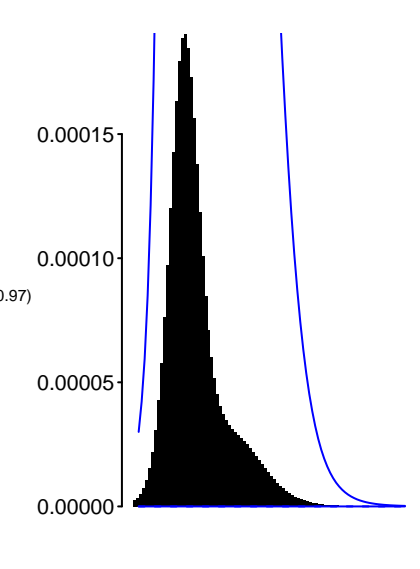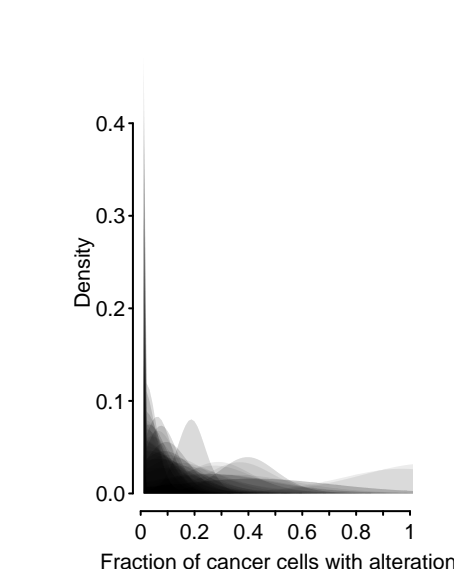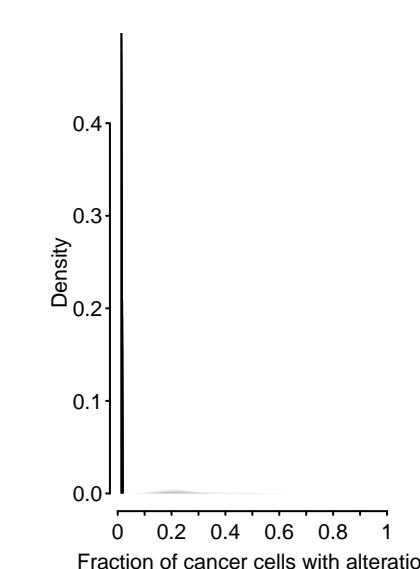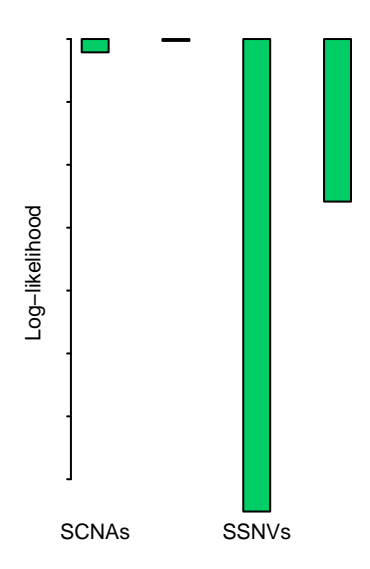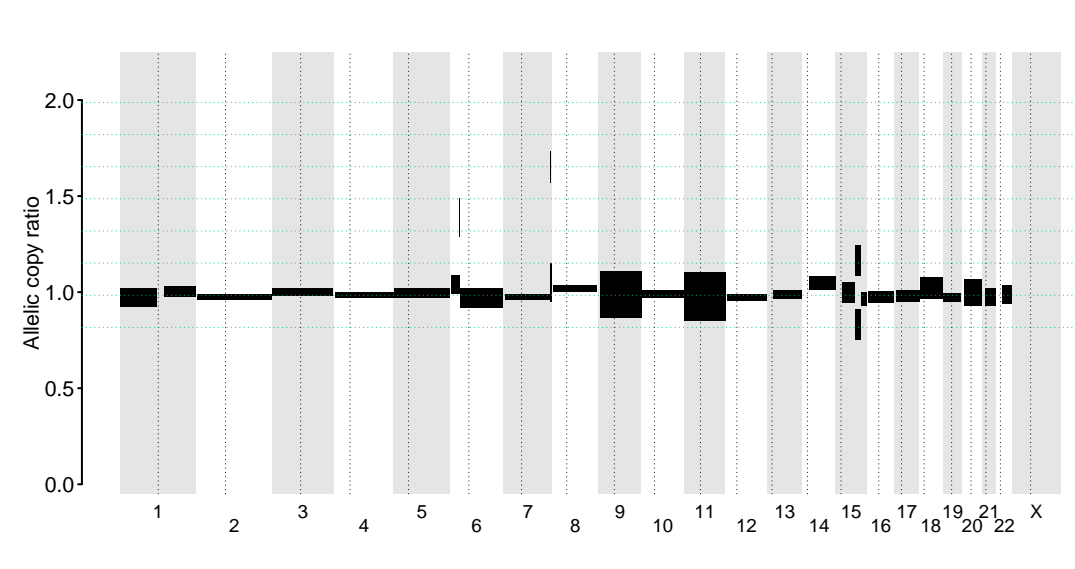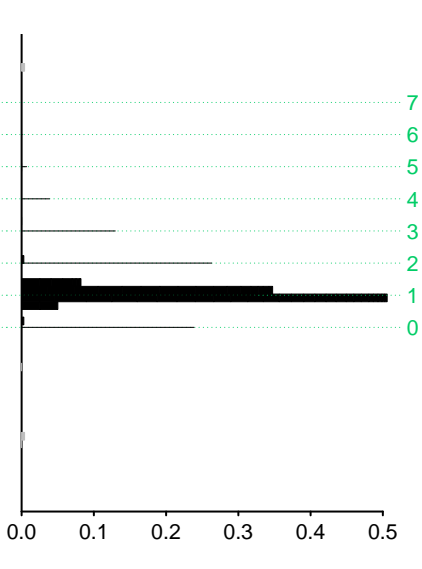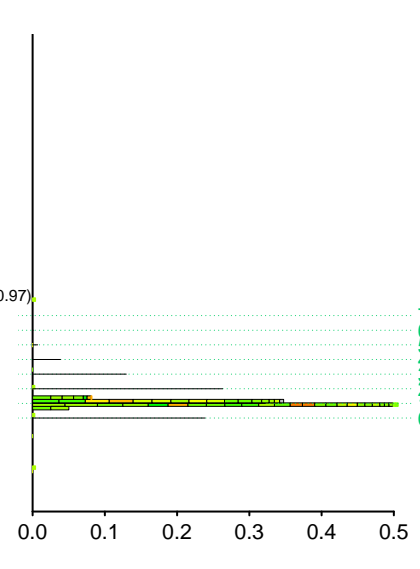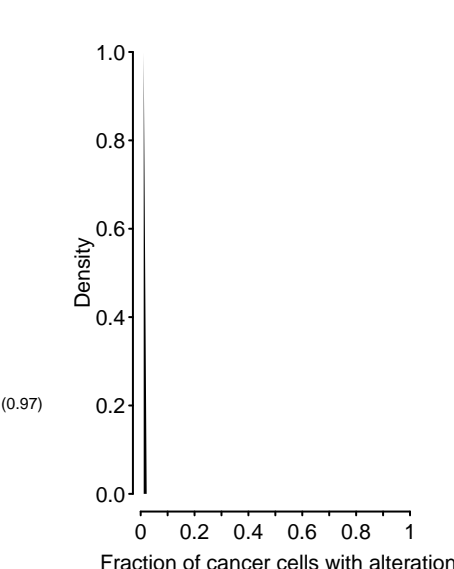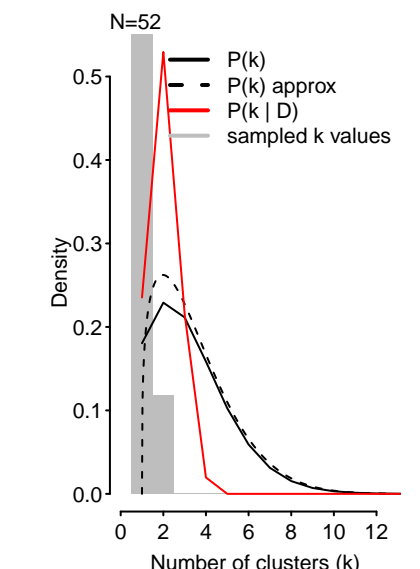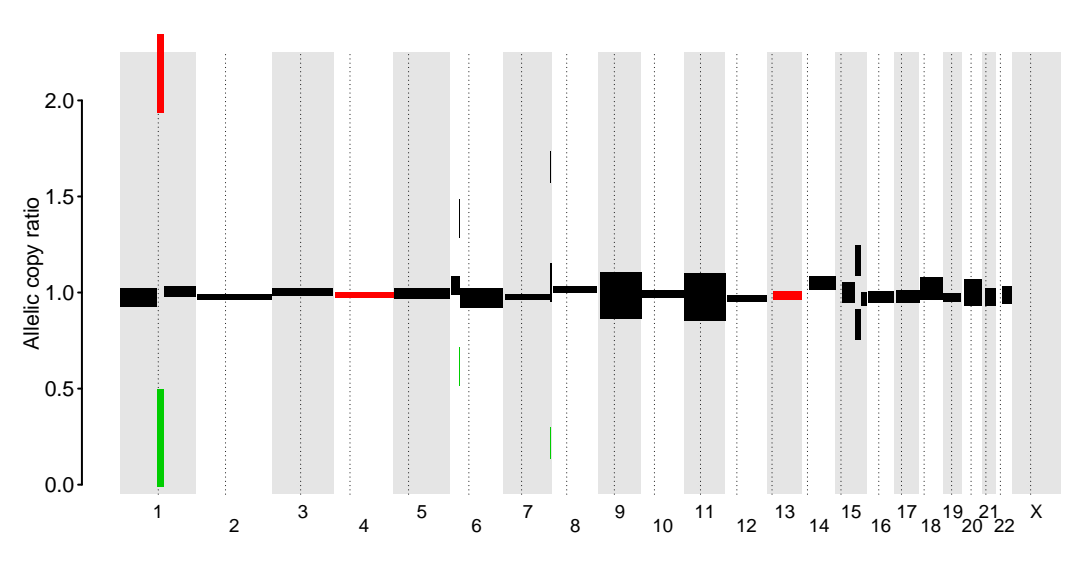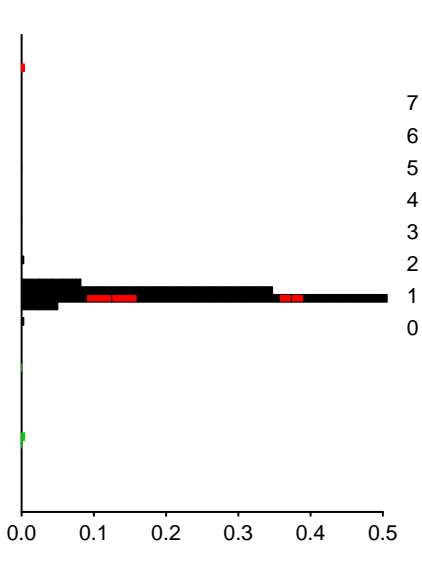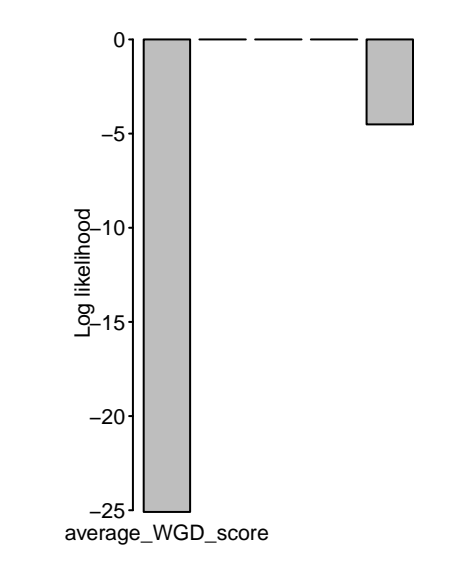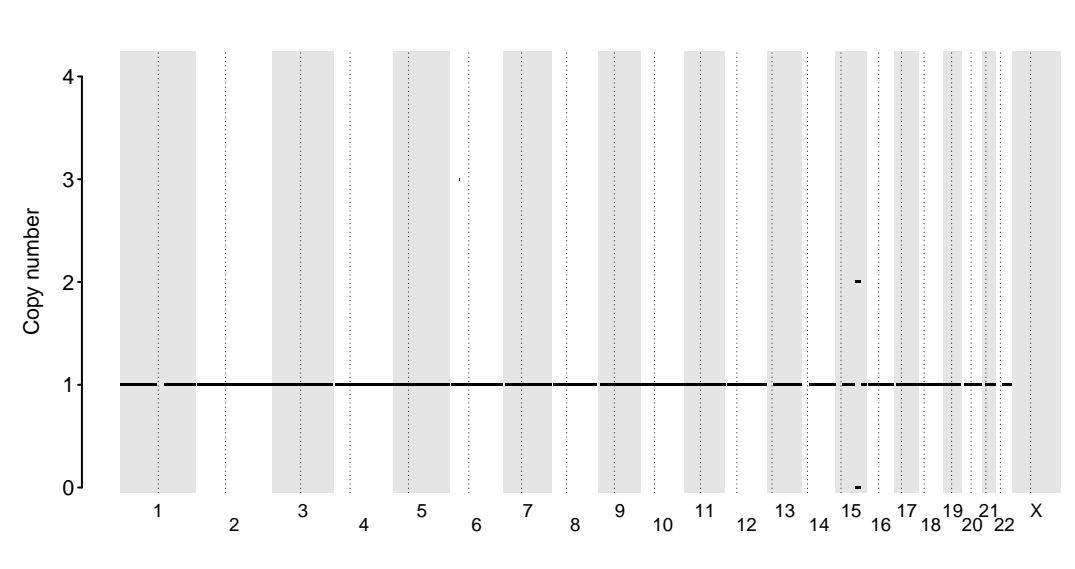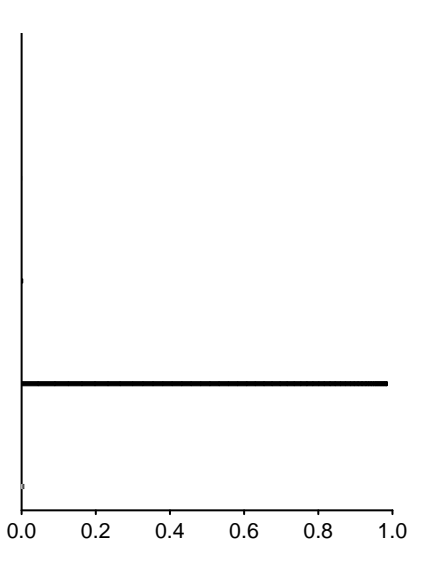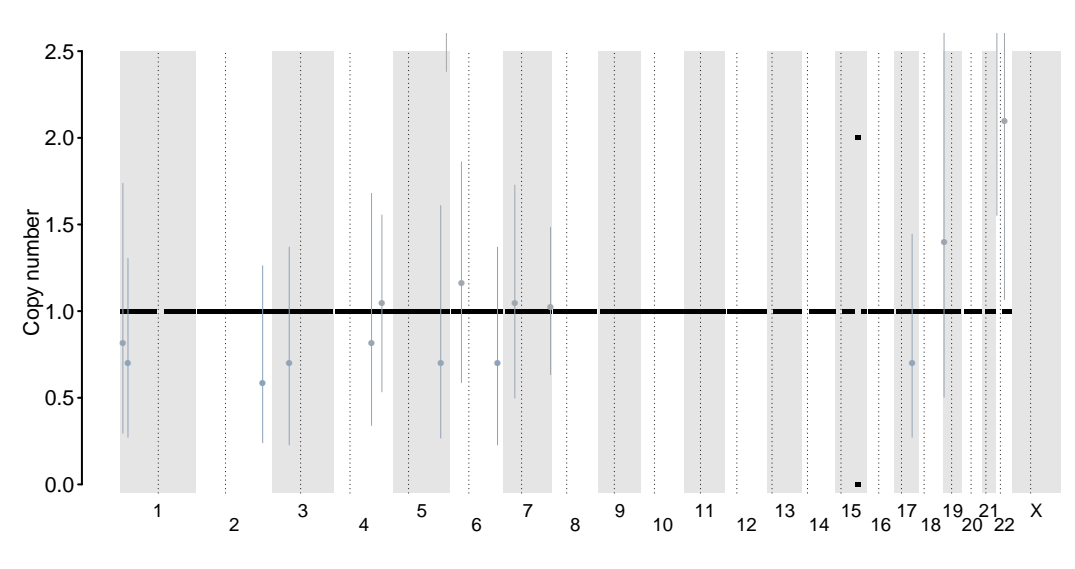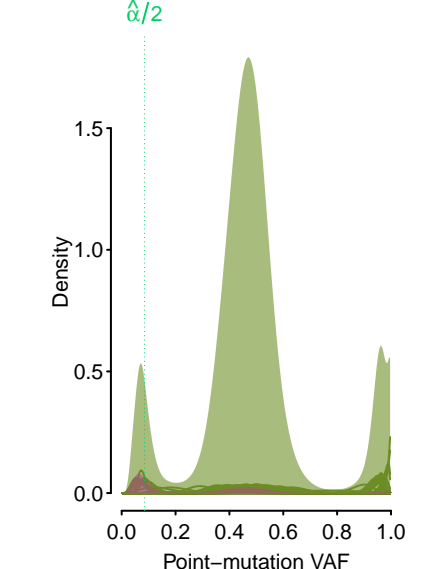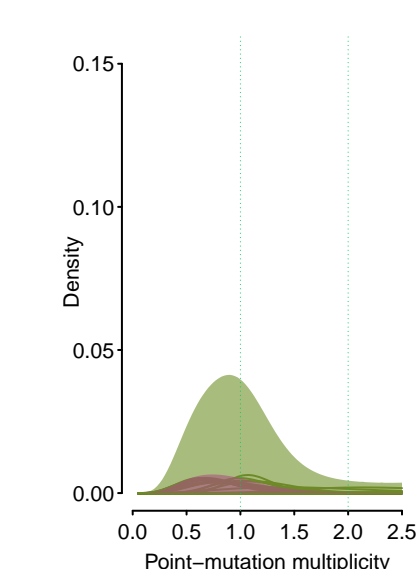



Sample 91

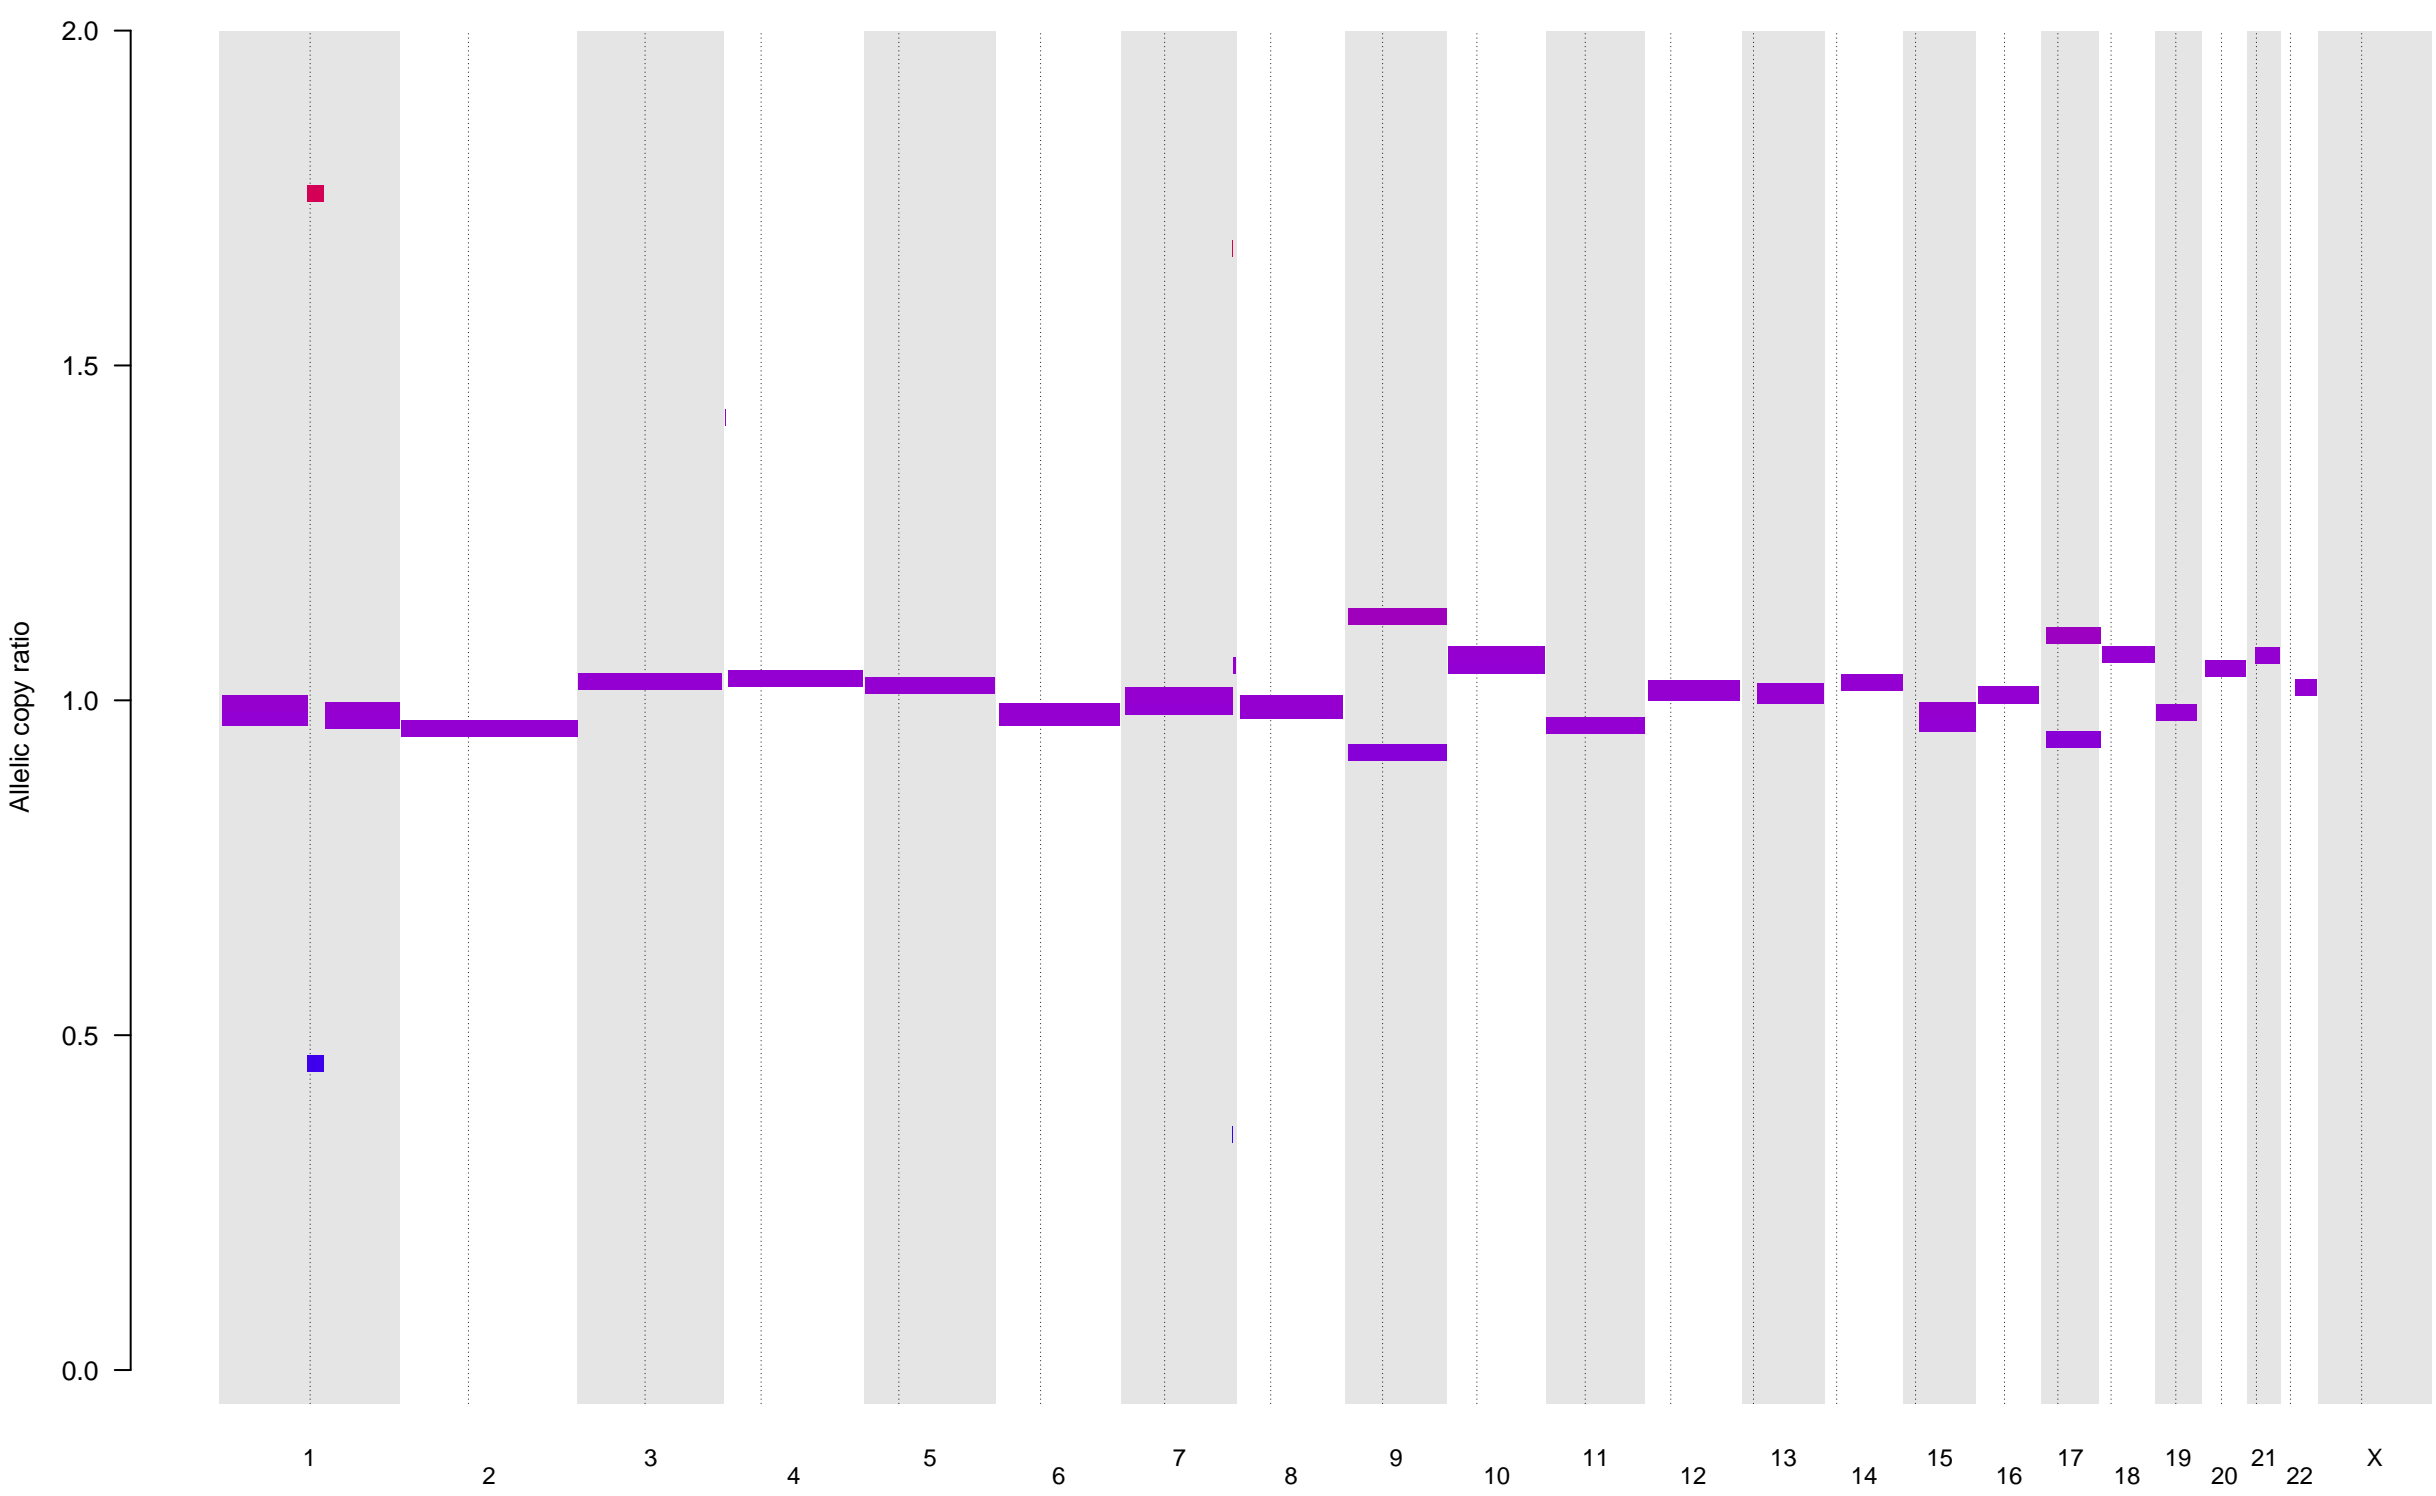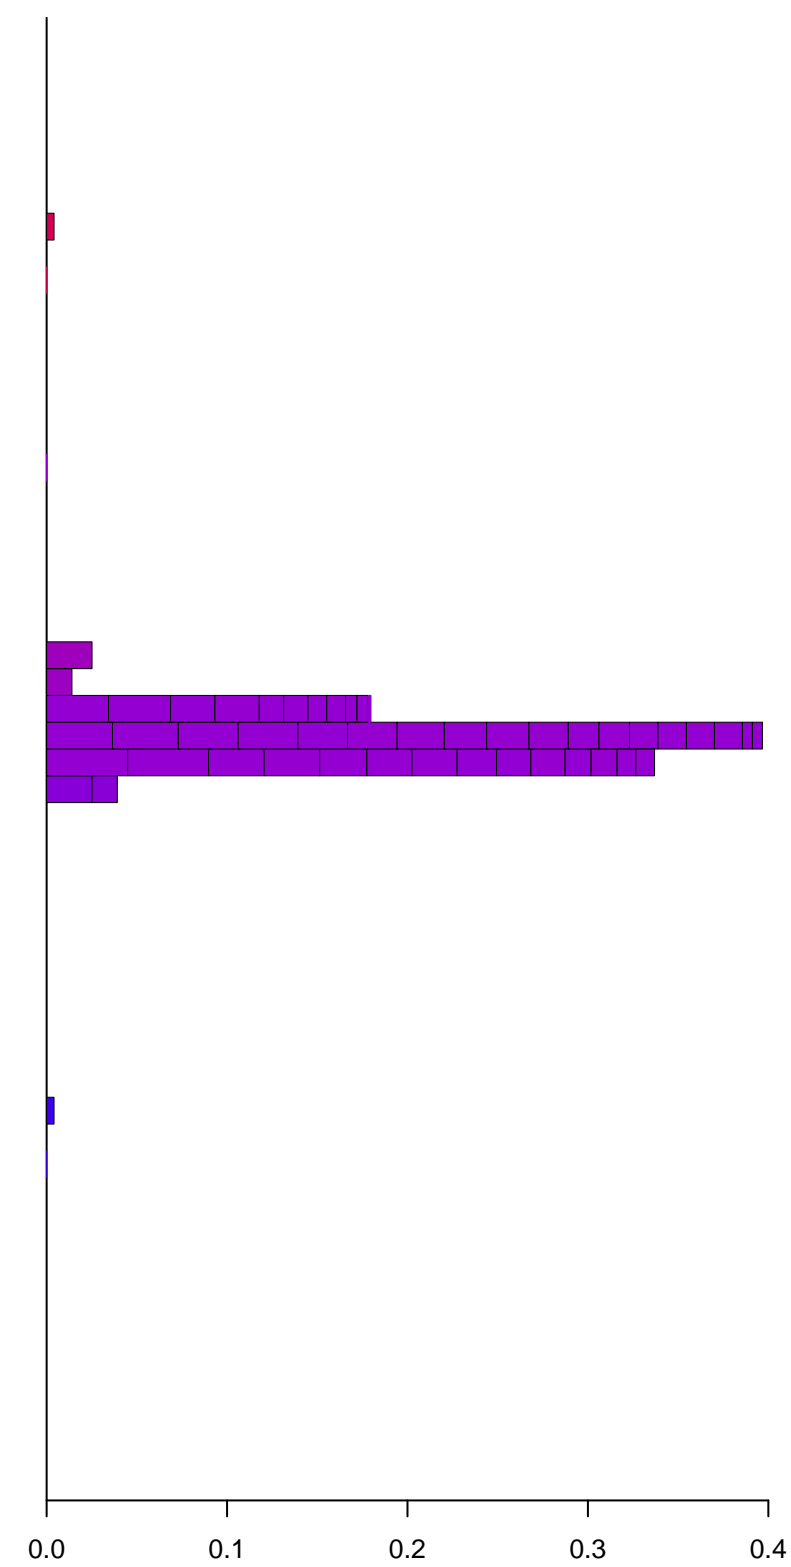

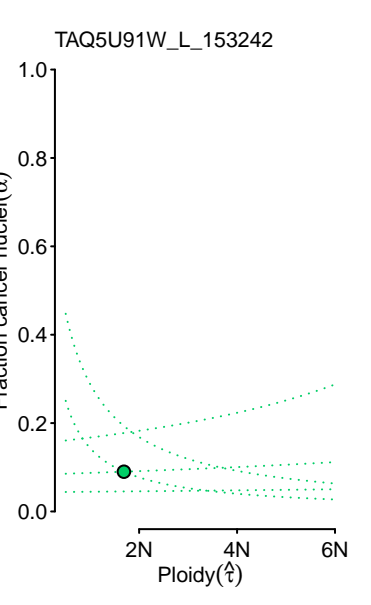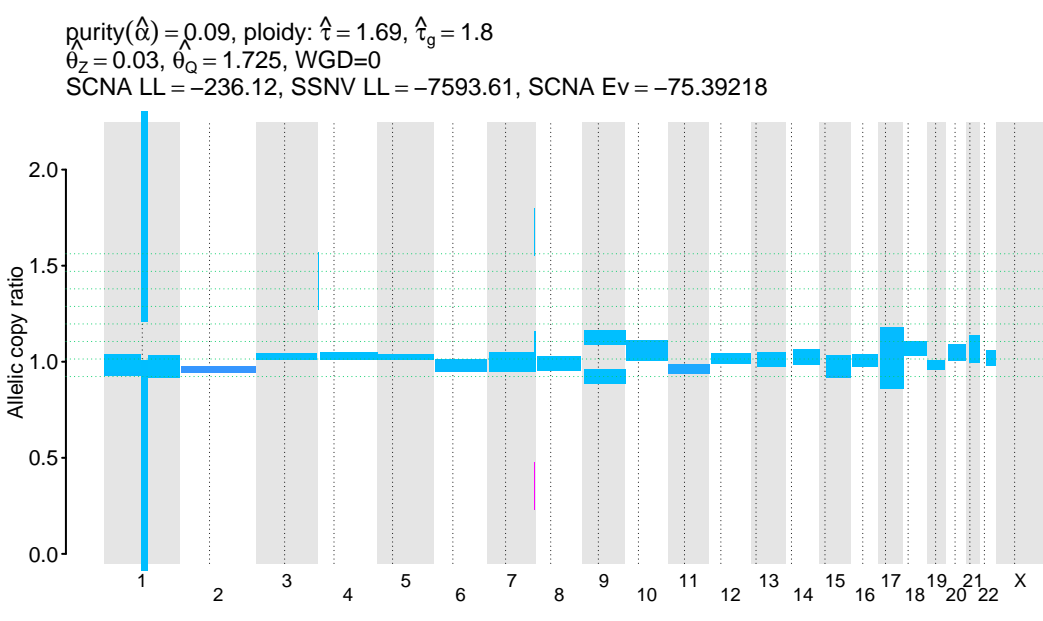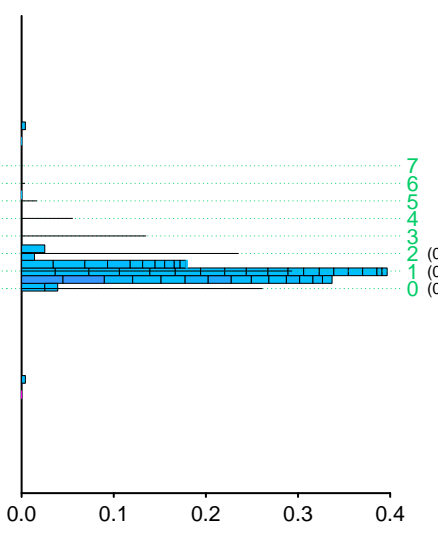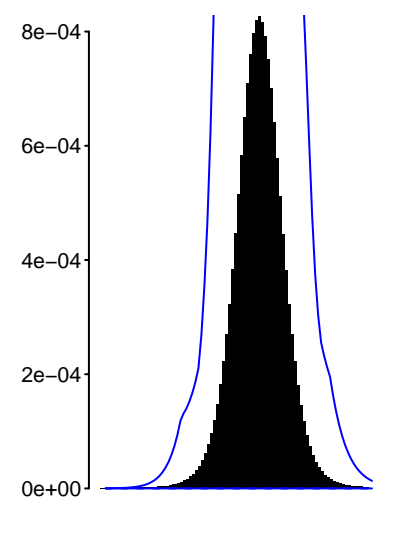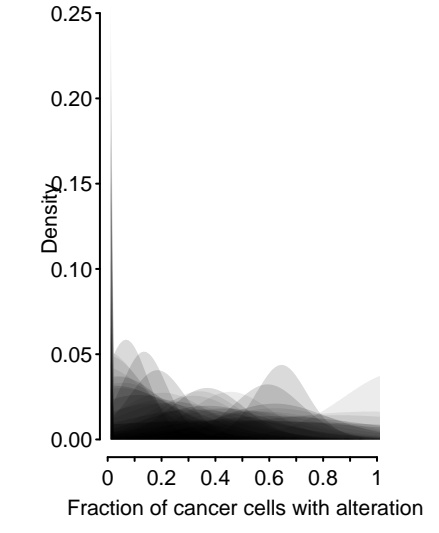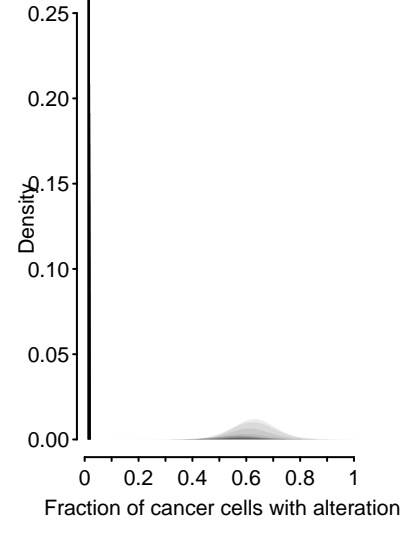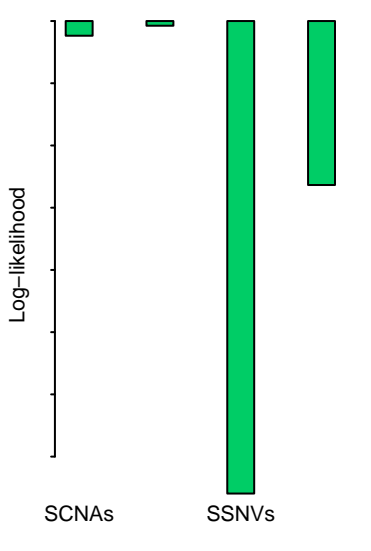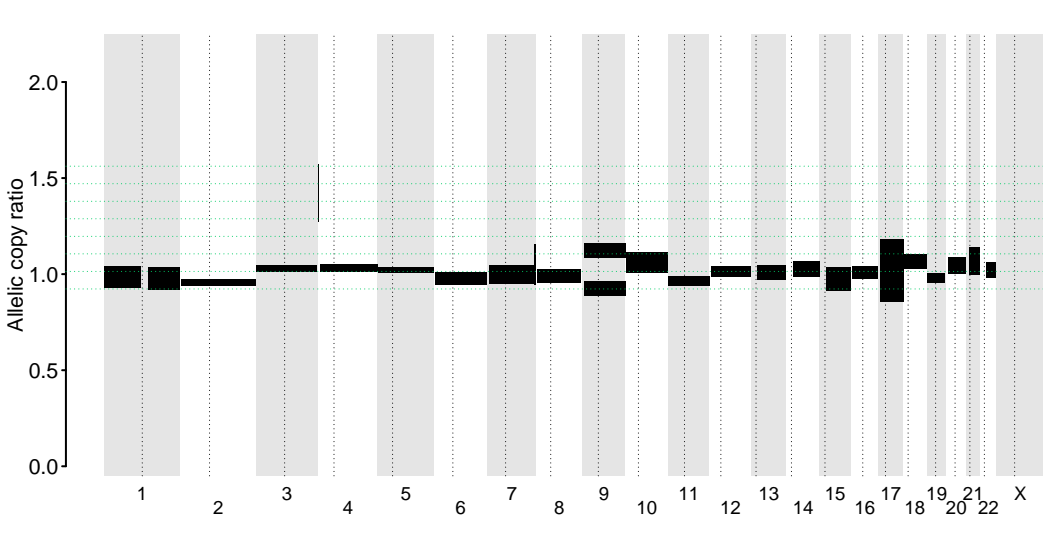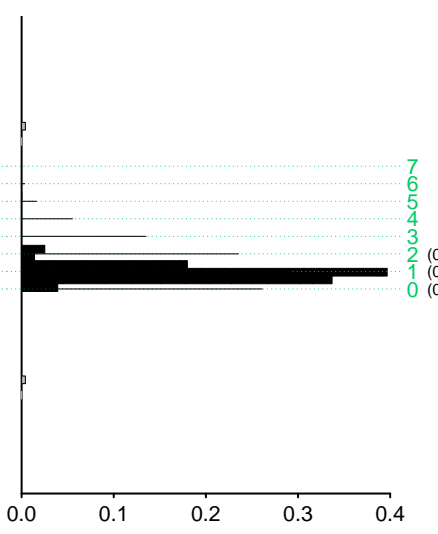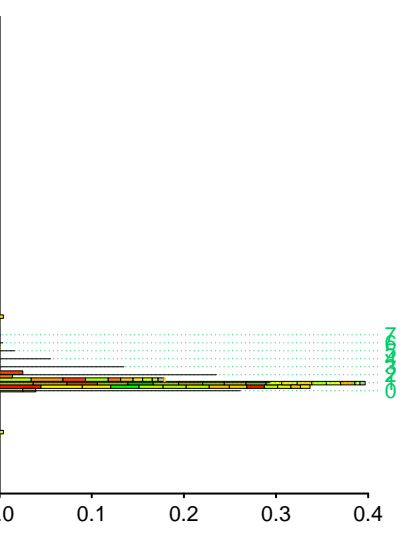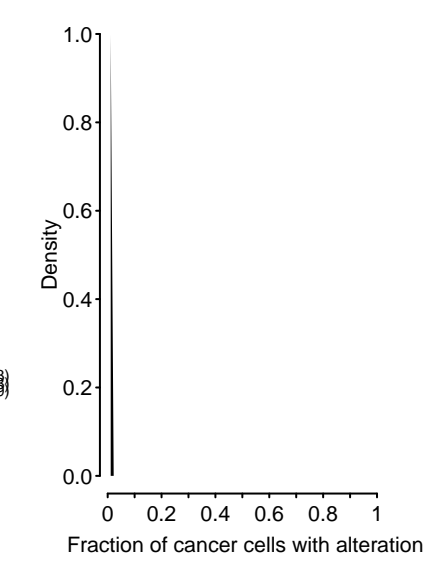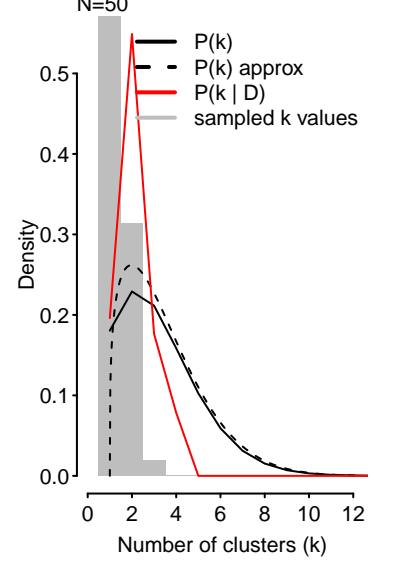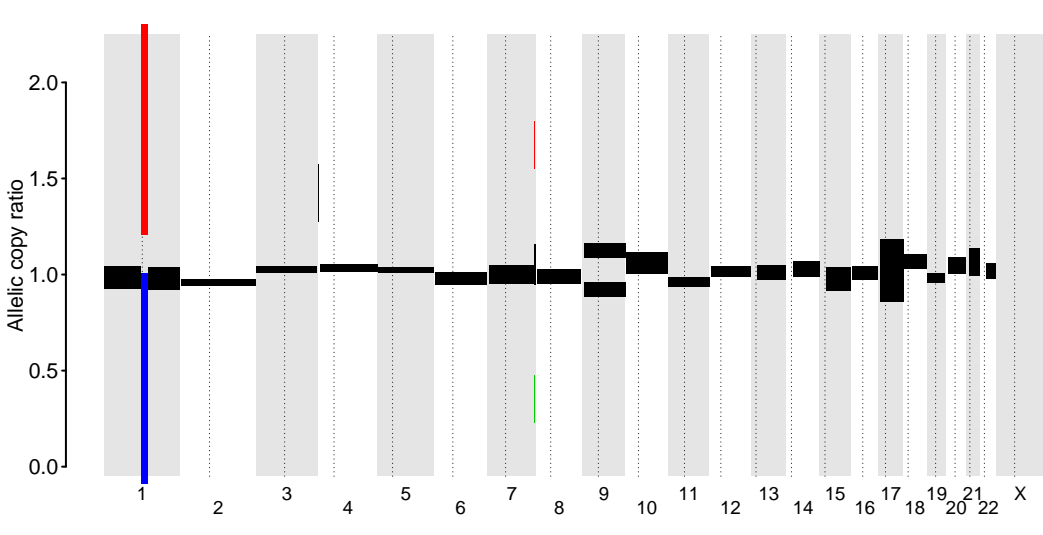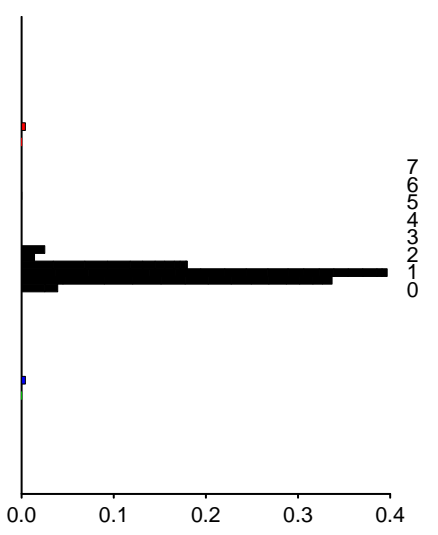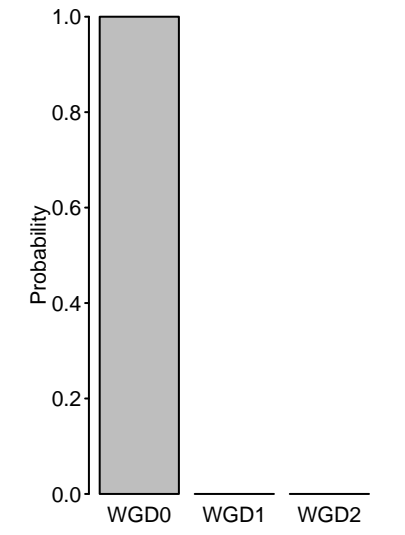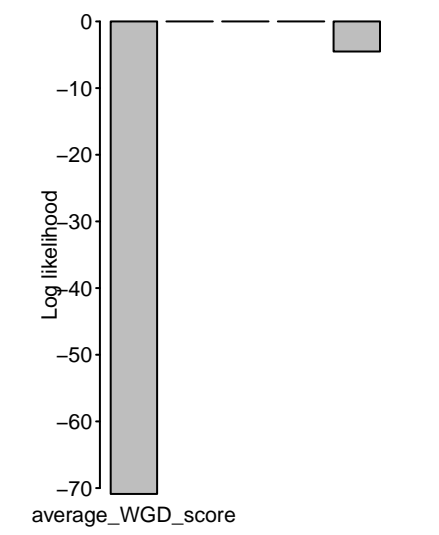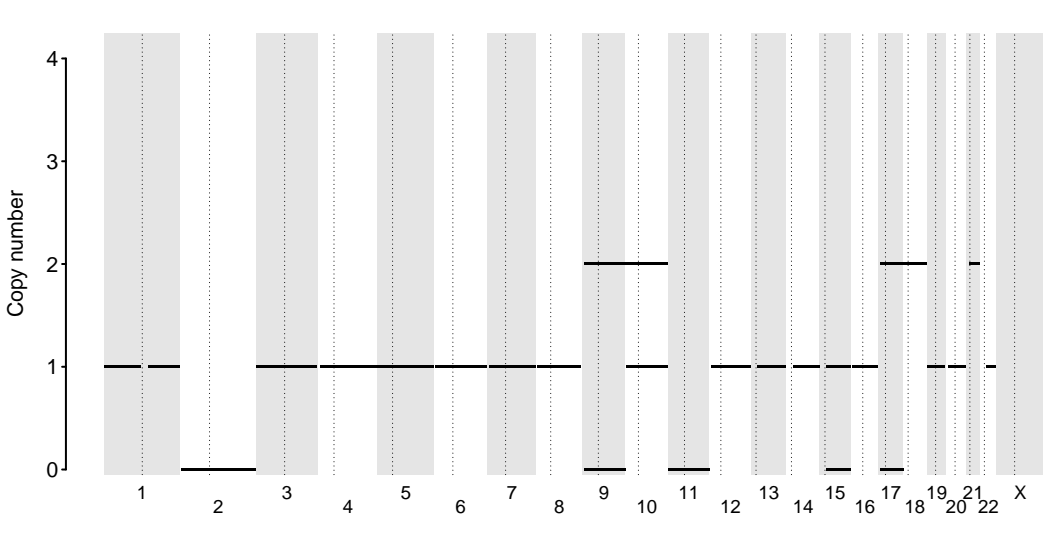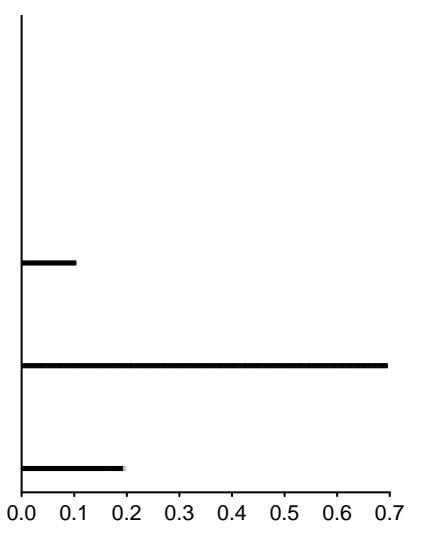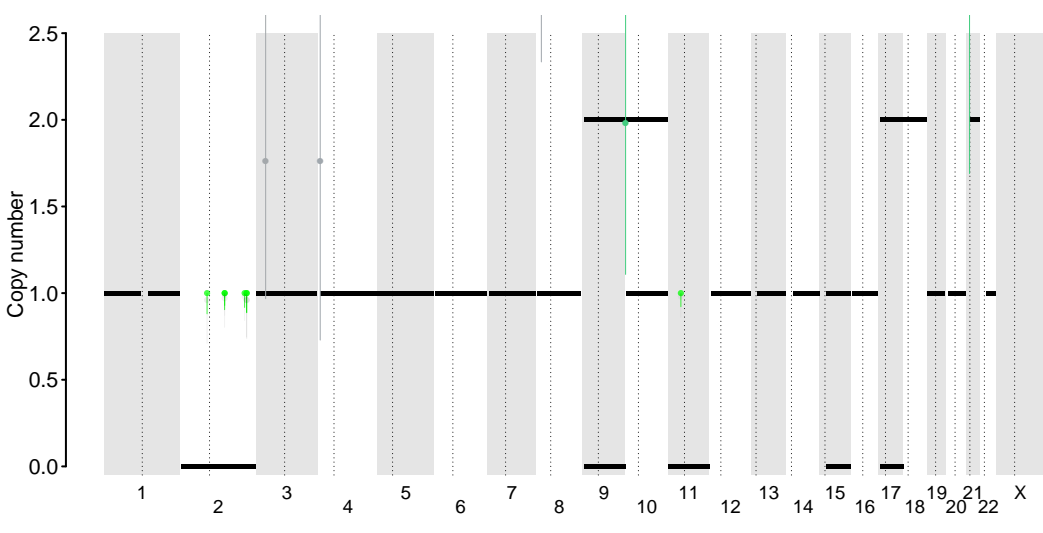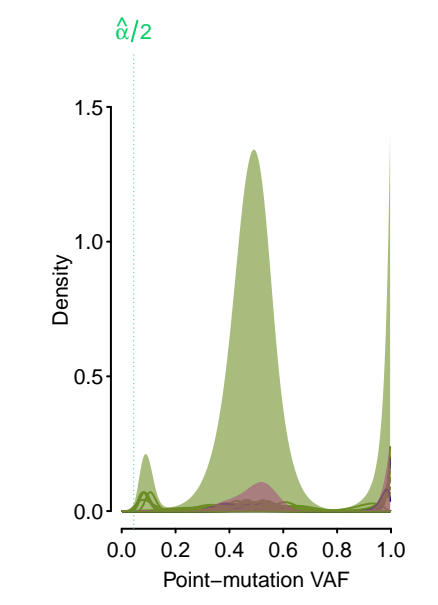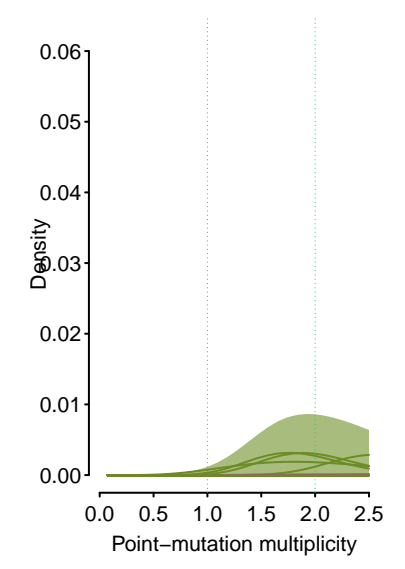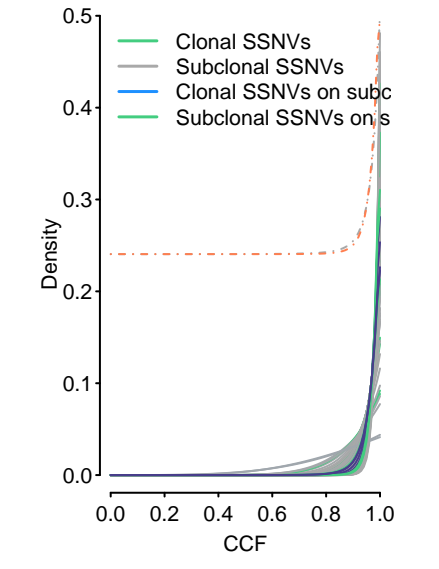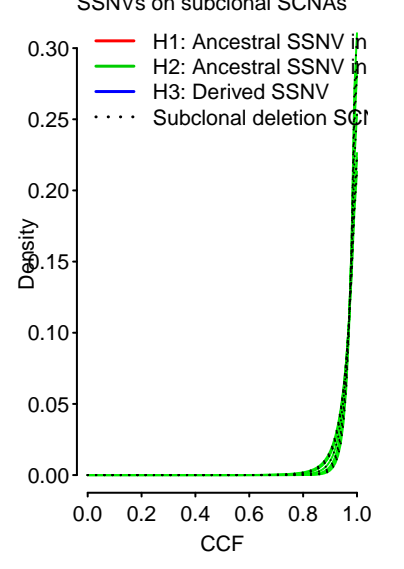

Sample 92

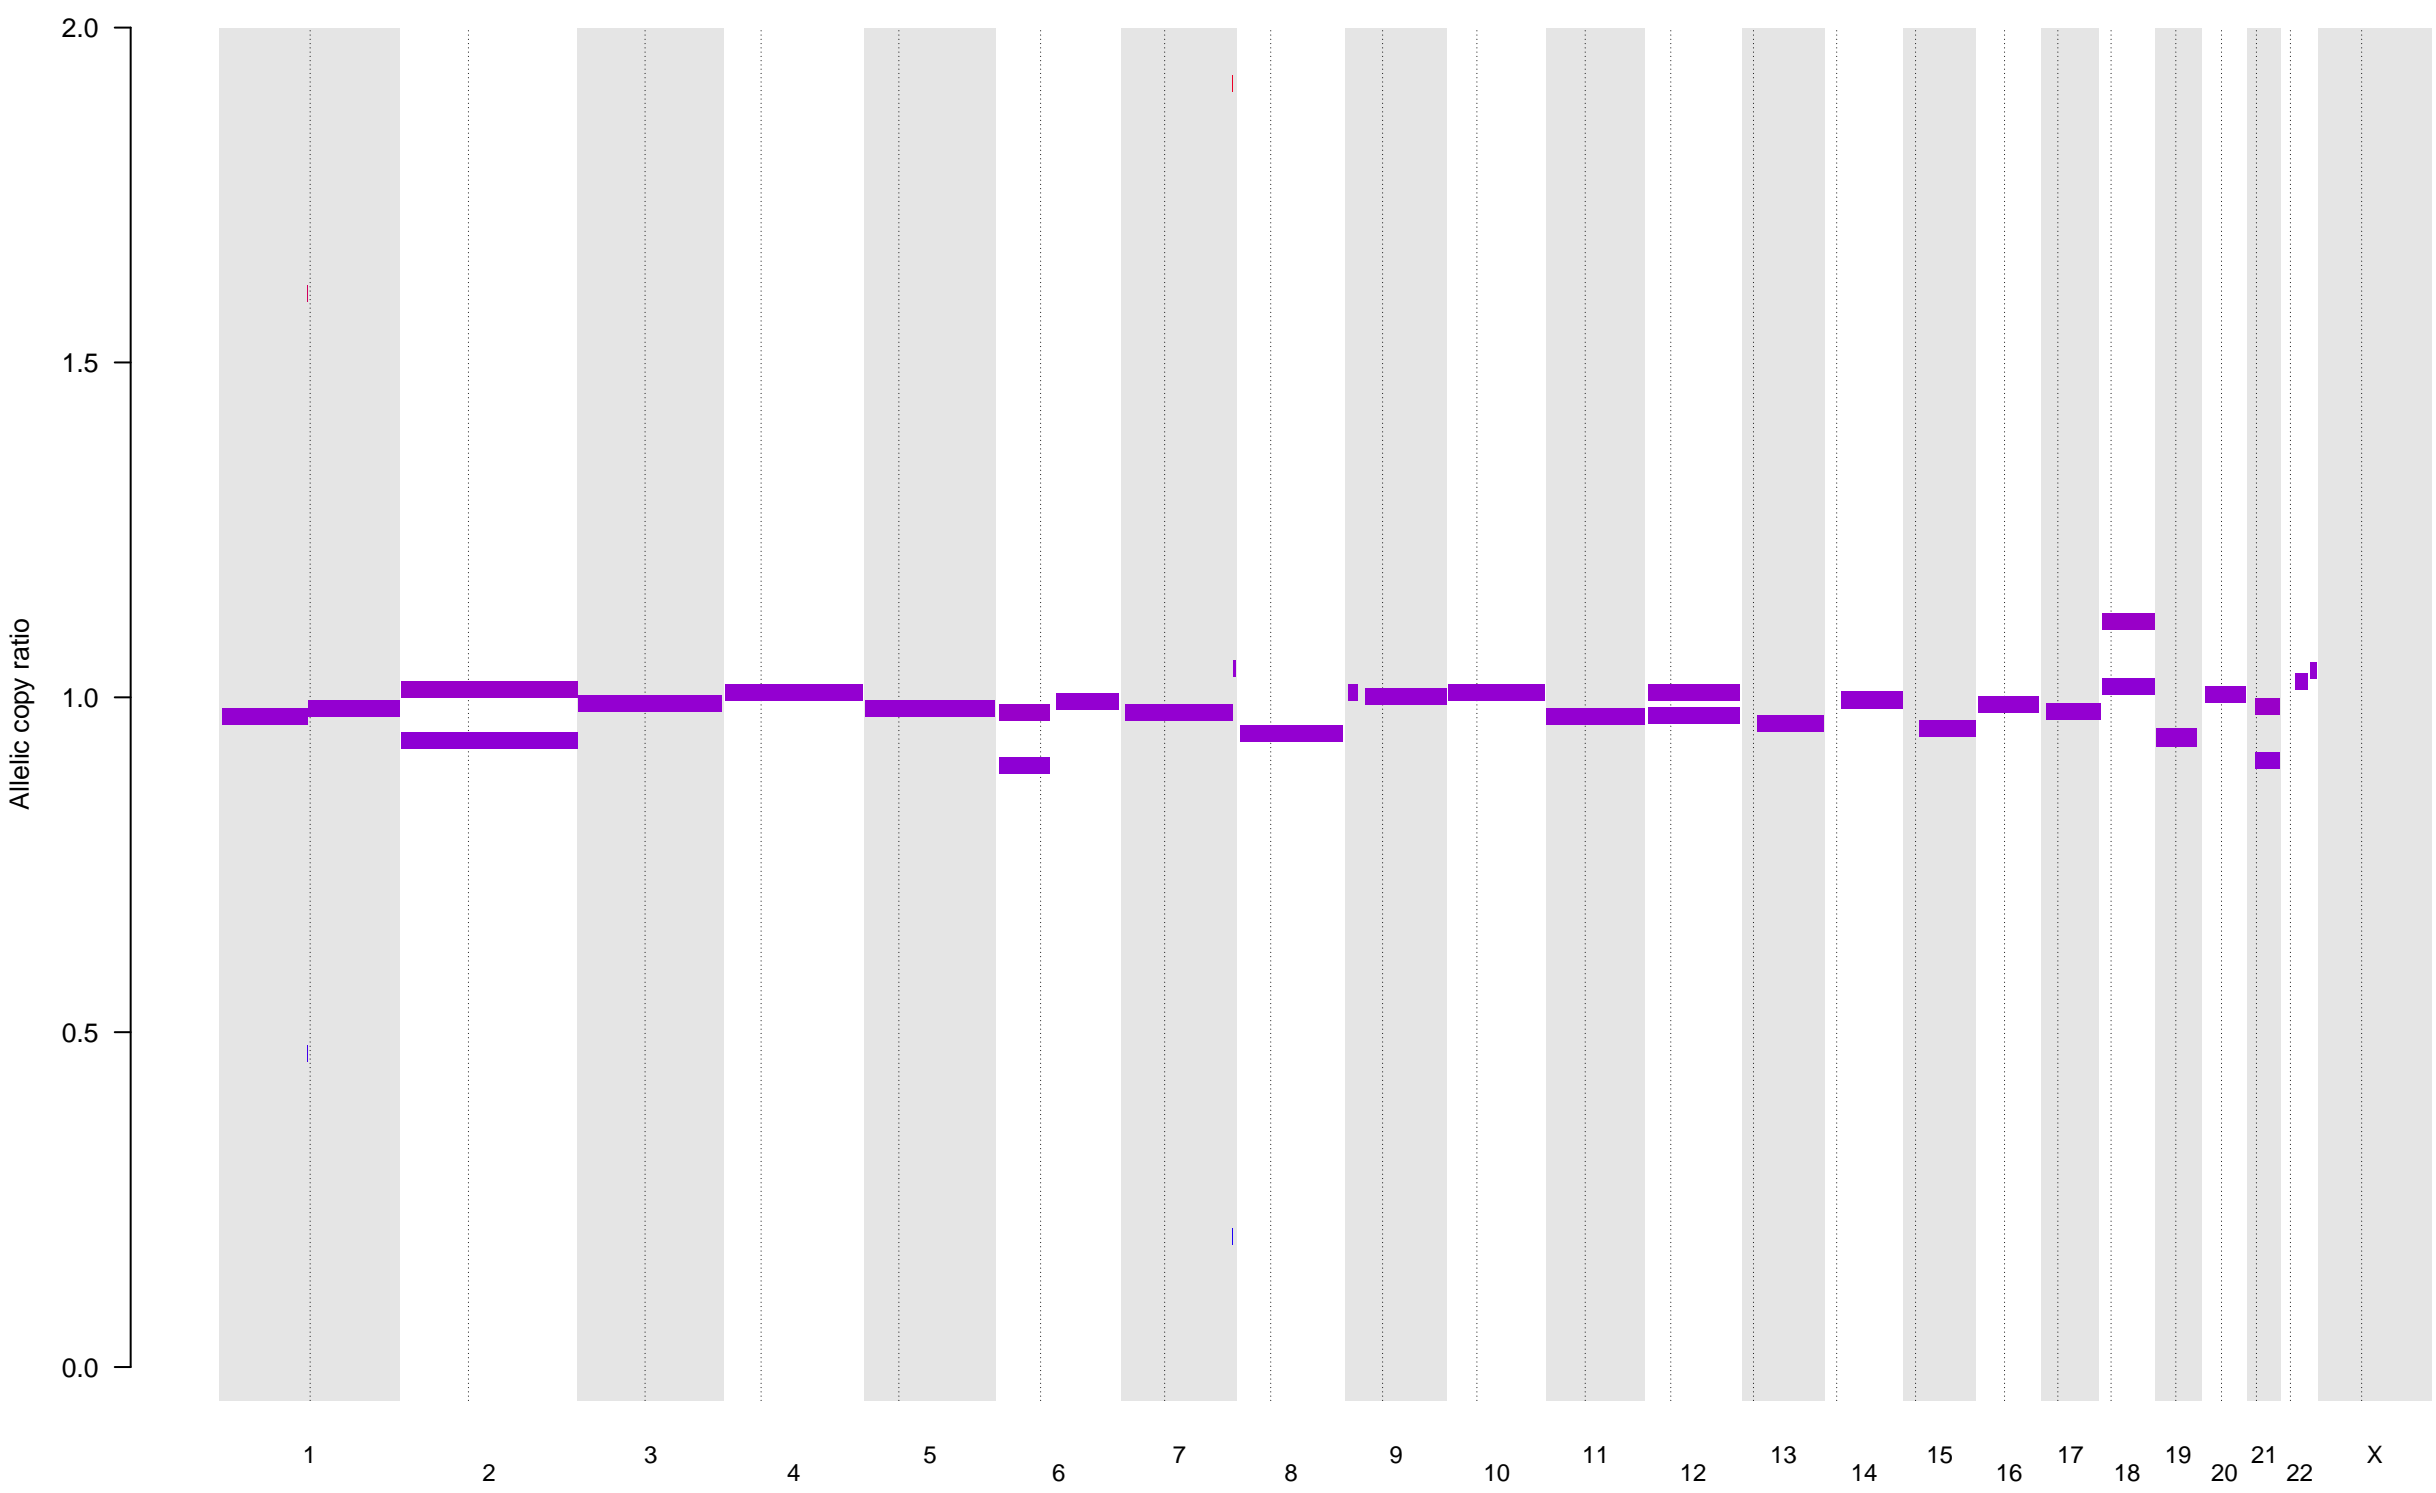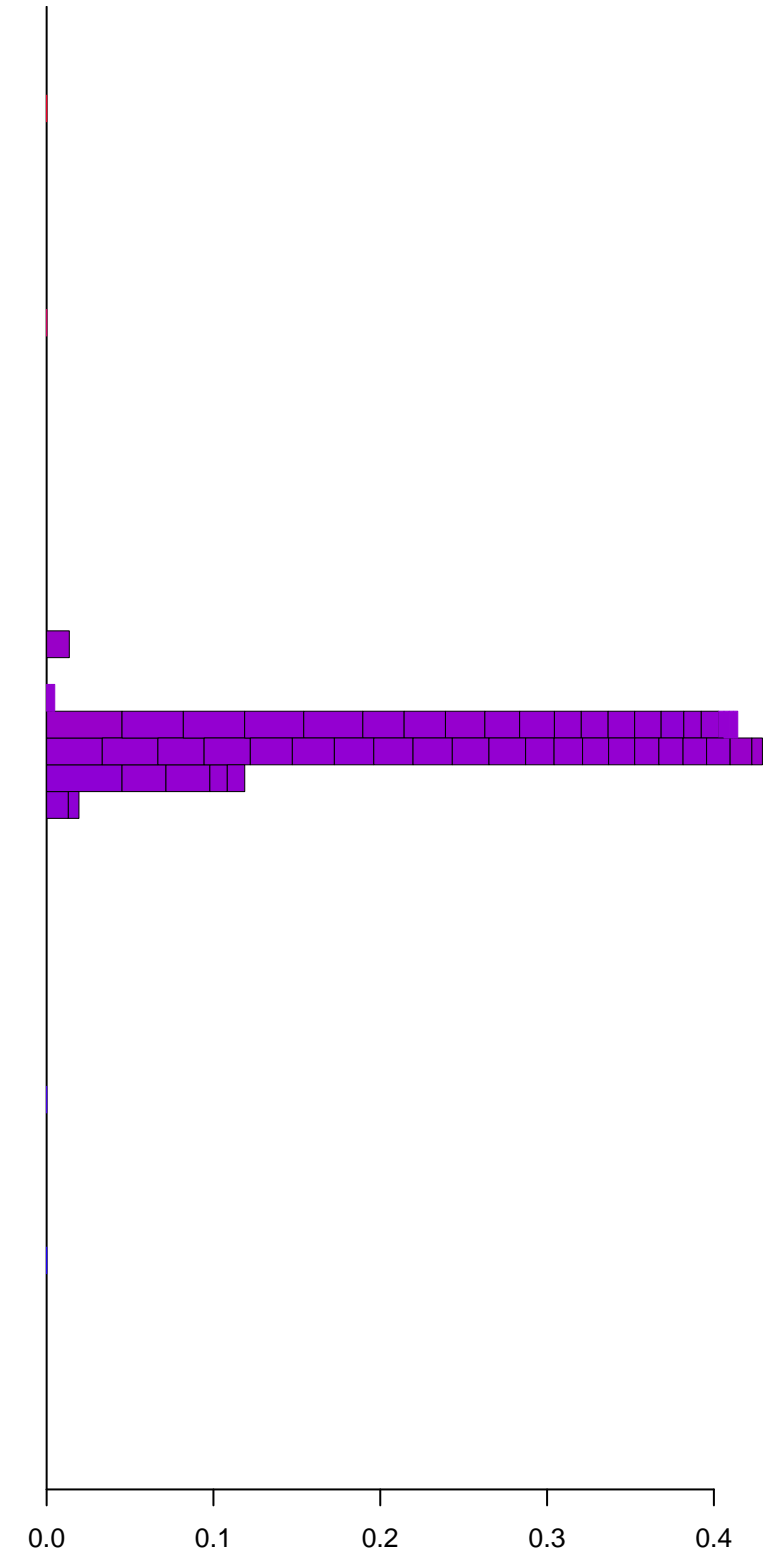

$\text{purity}(\hat{\lambda}) = 0.14$ , ploidy:  $\hat{t} = 2$ ,  $\hat{t}_0 = 1.96$   
 $\theta_z = 0.12$ ,  $\theta_Q = 1.421$ , WGD=0  
 SCNA LL = -235.11, SSNV LL = -8828.55, SCNA Ev = -84.85175

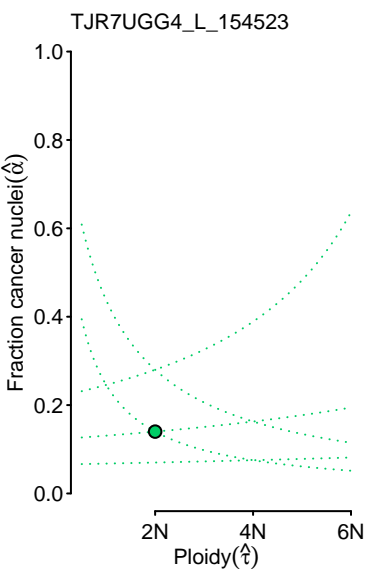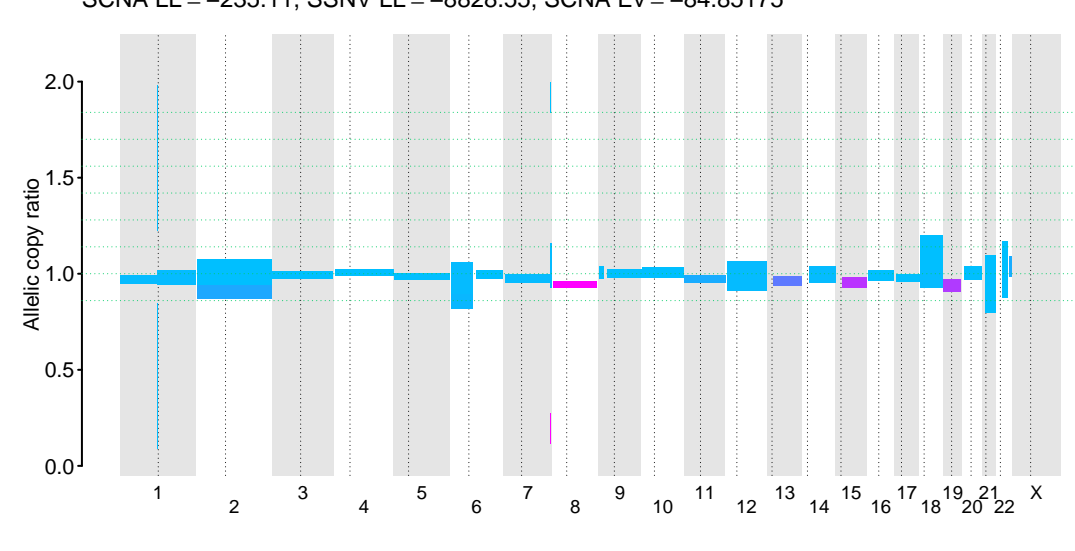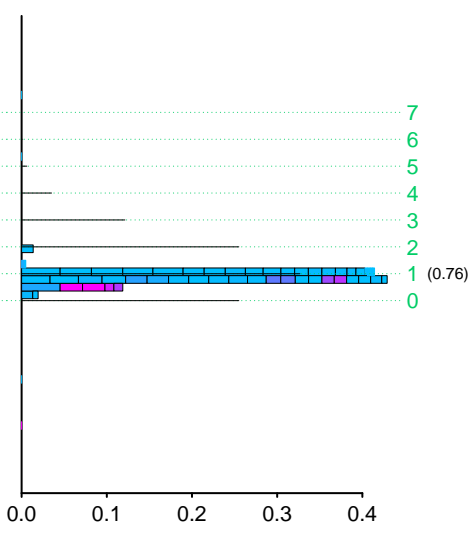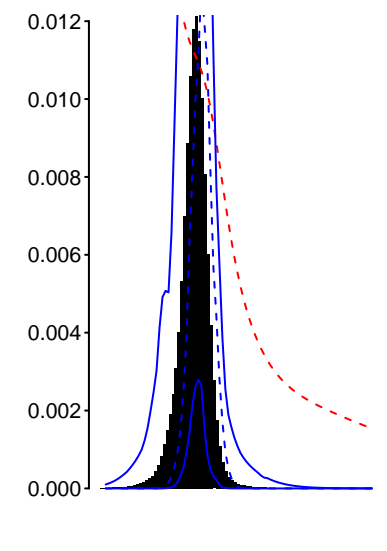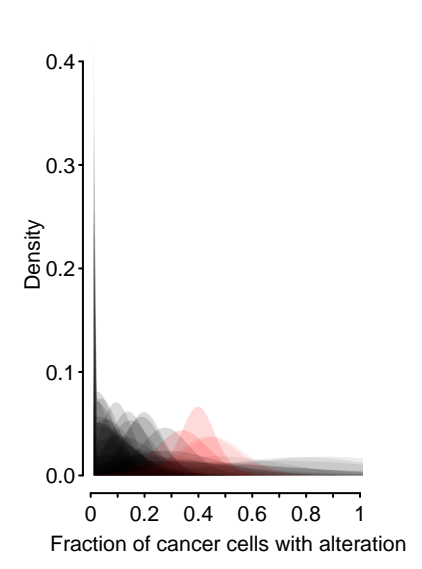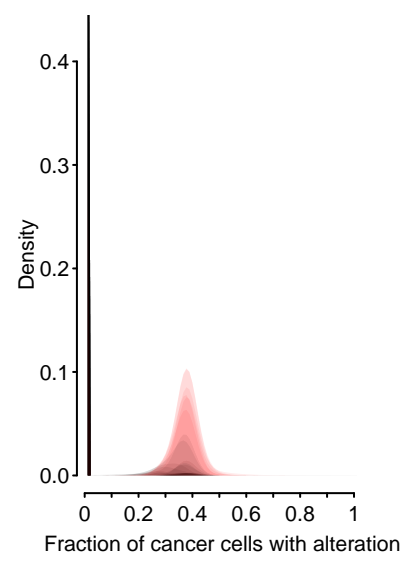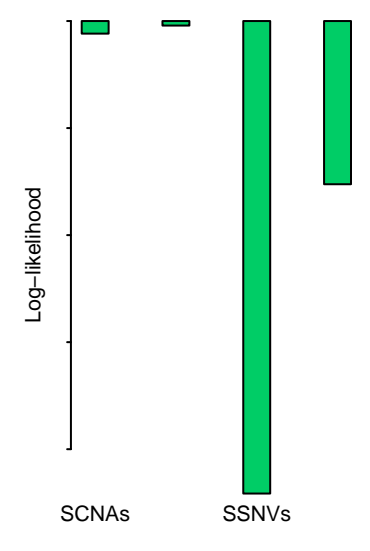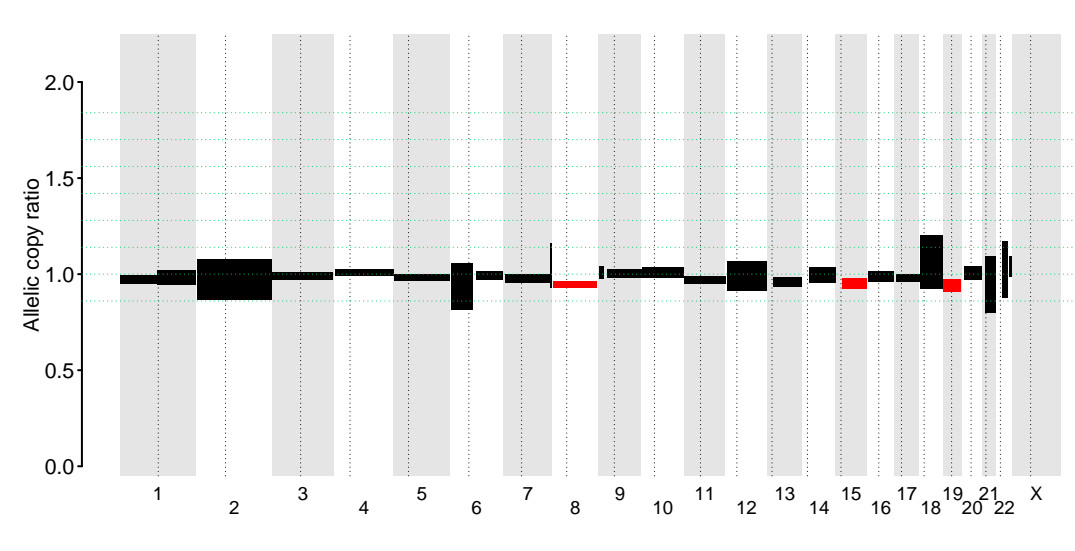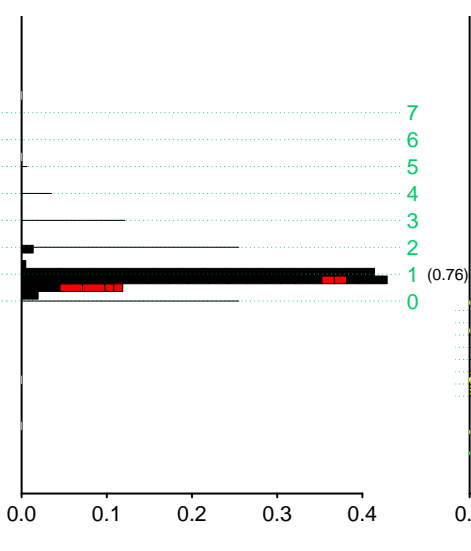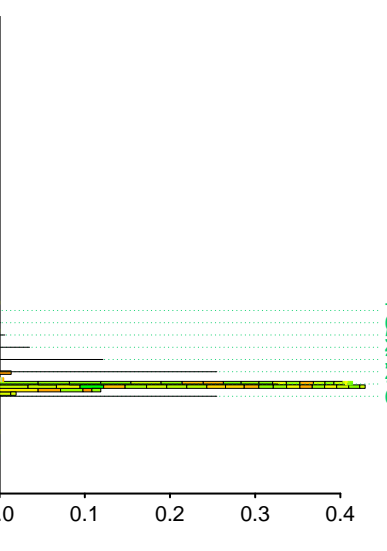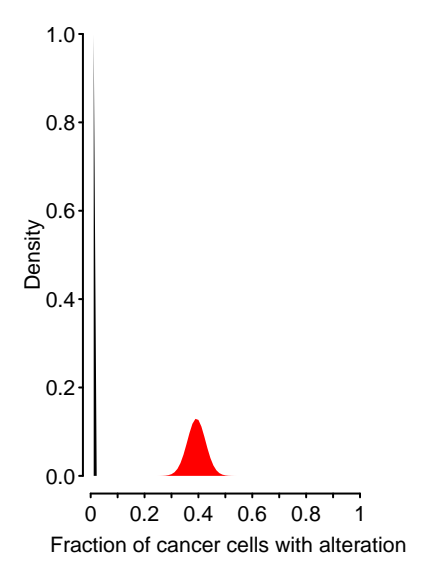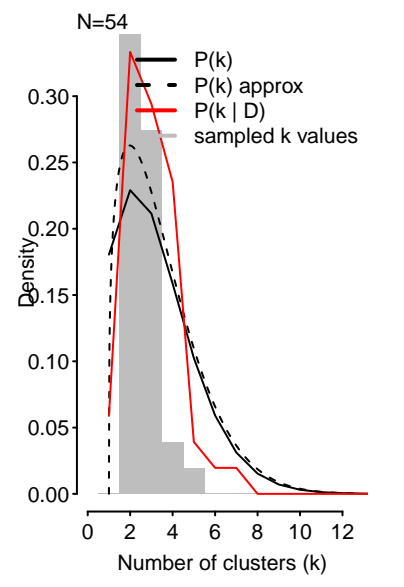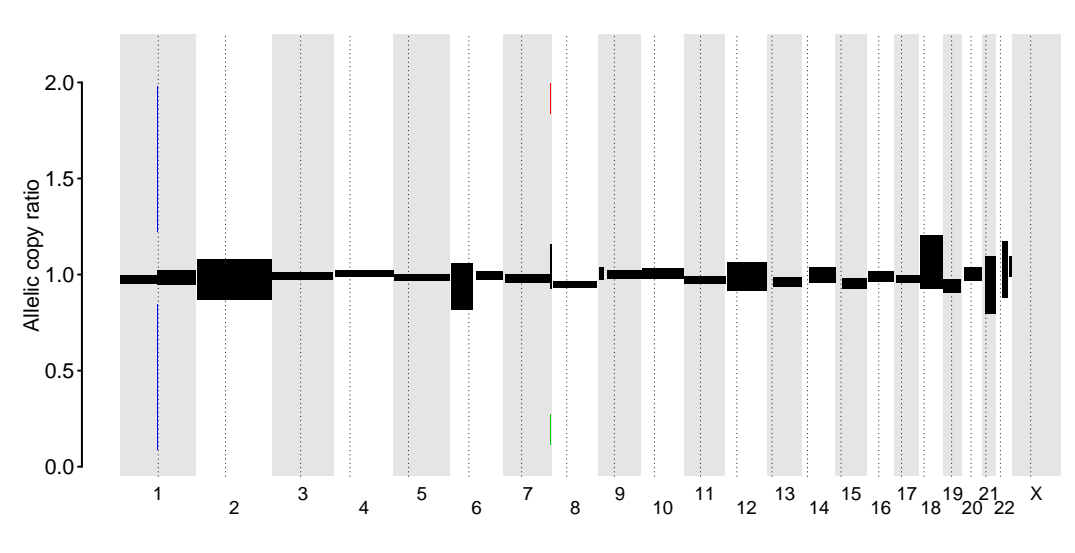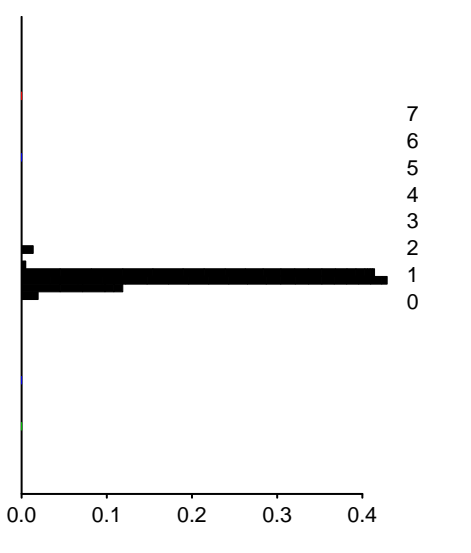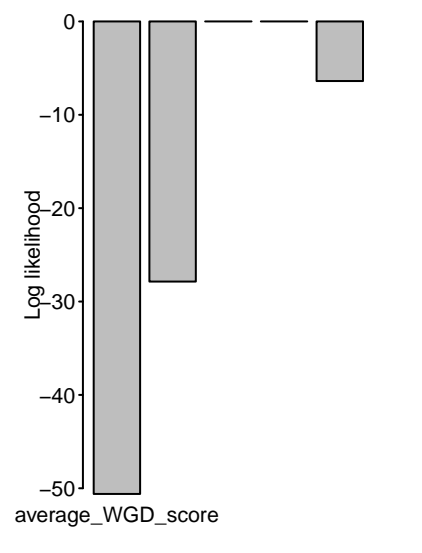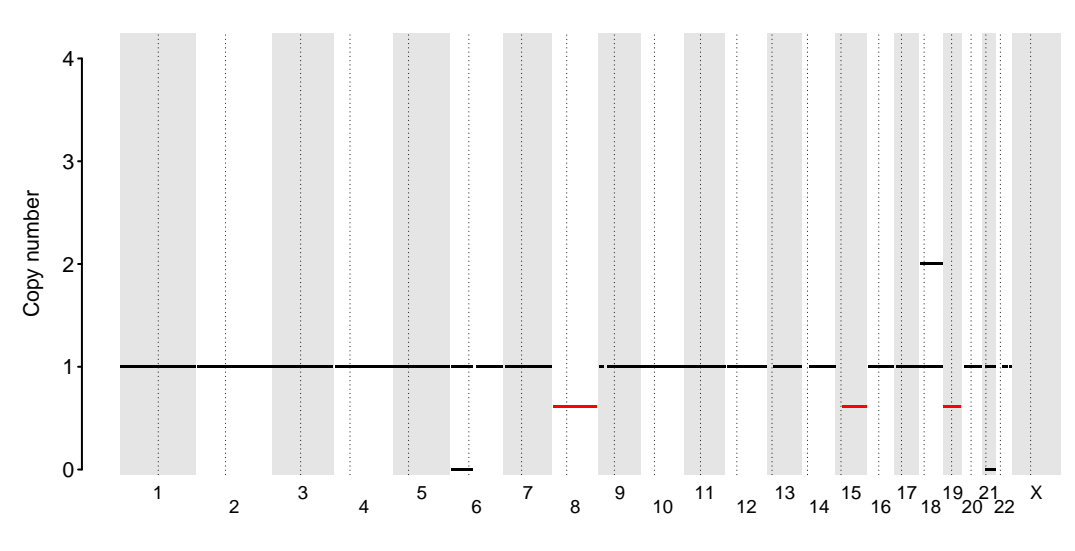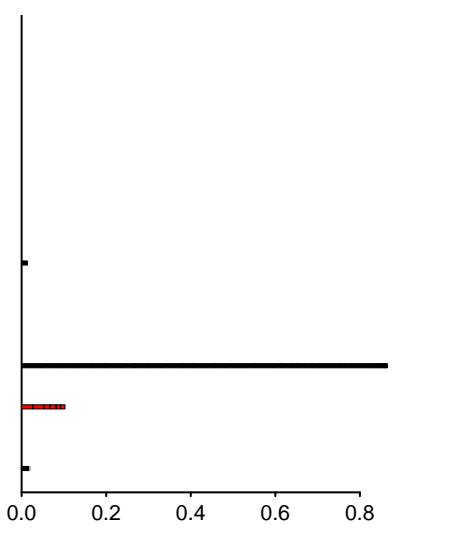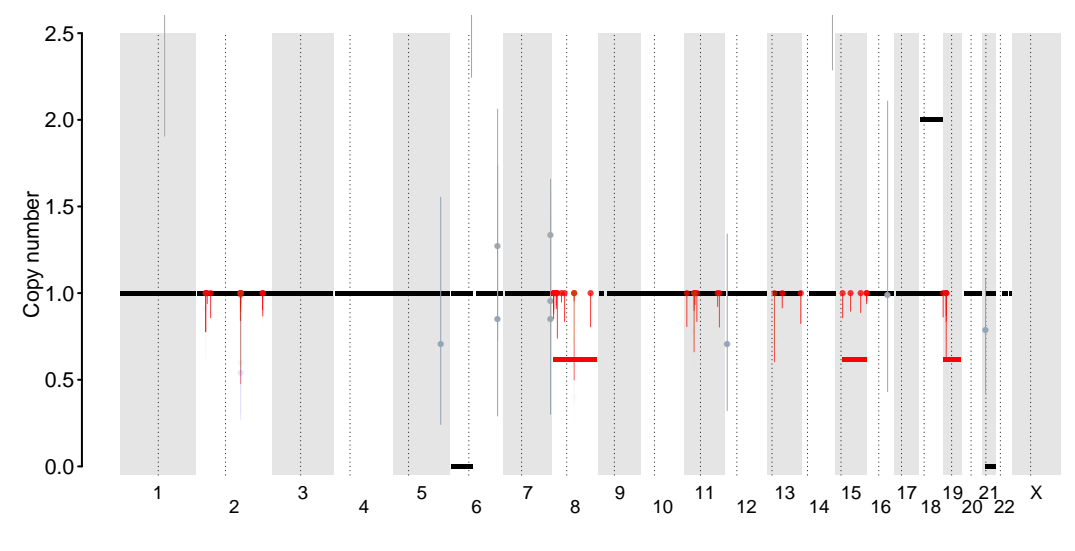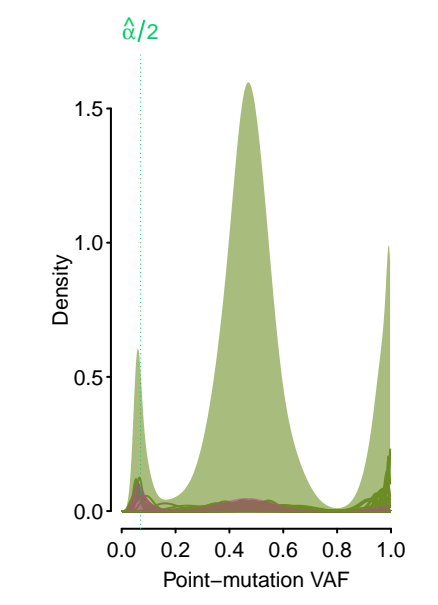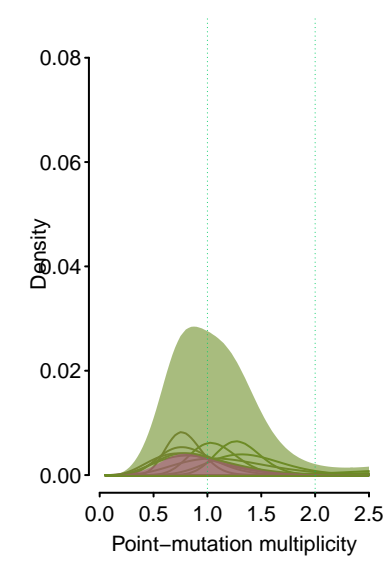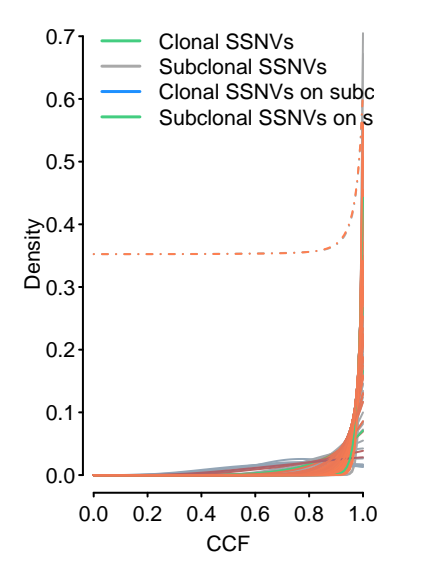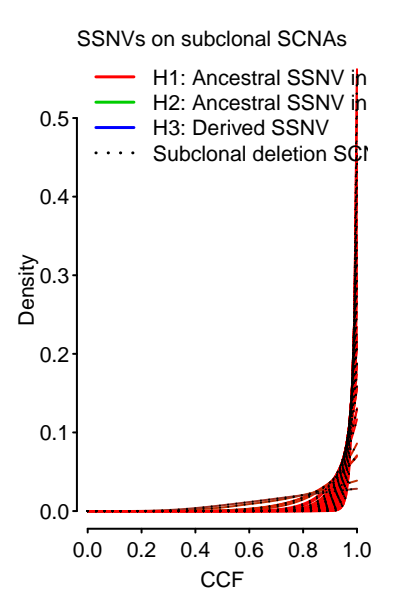

Sample 93

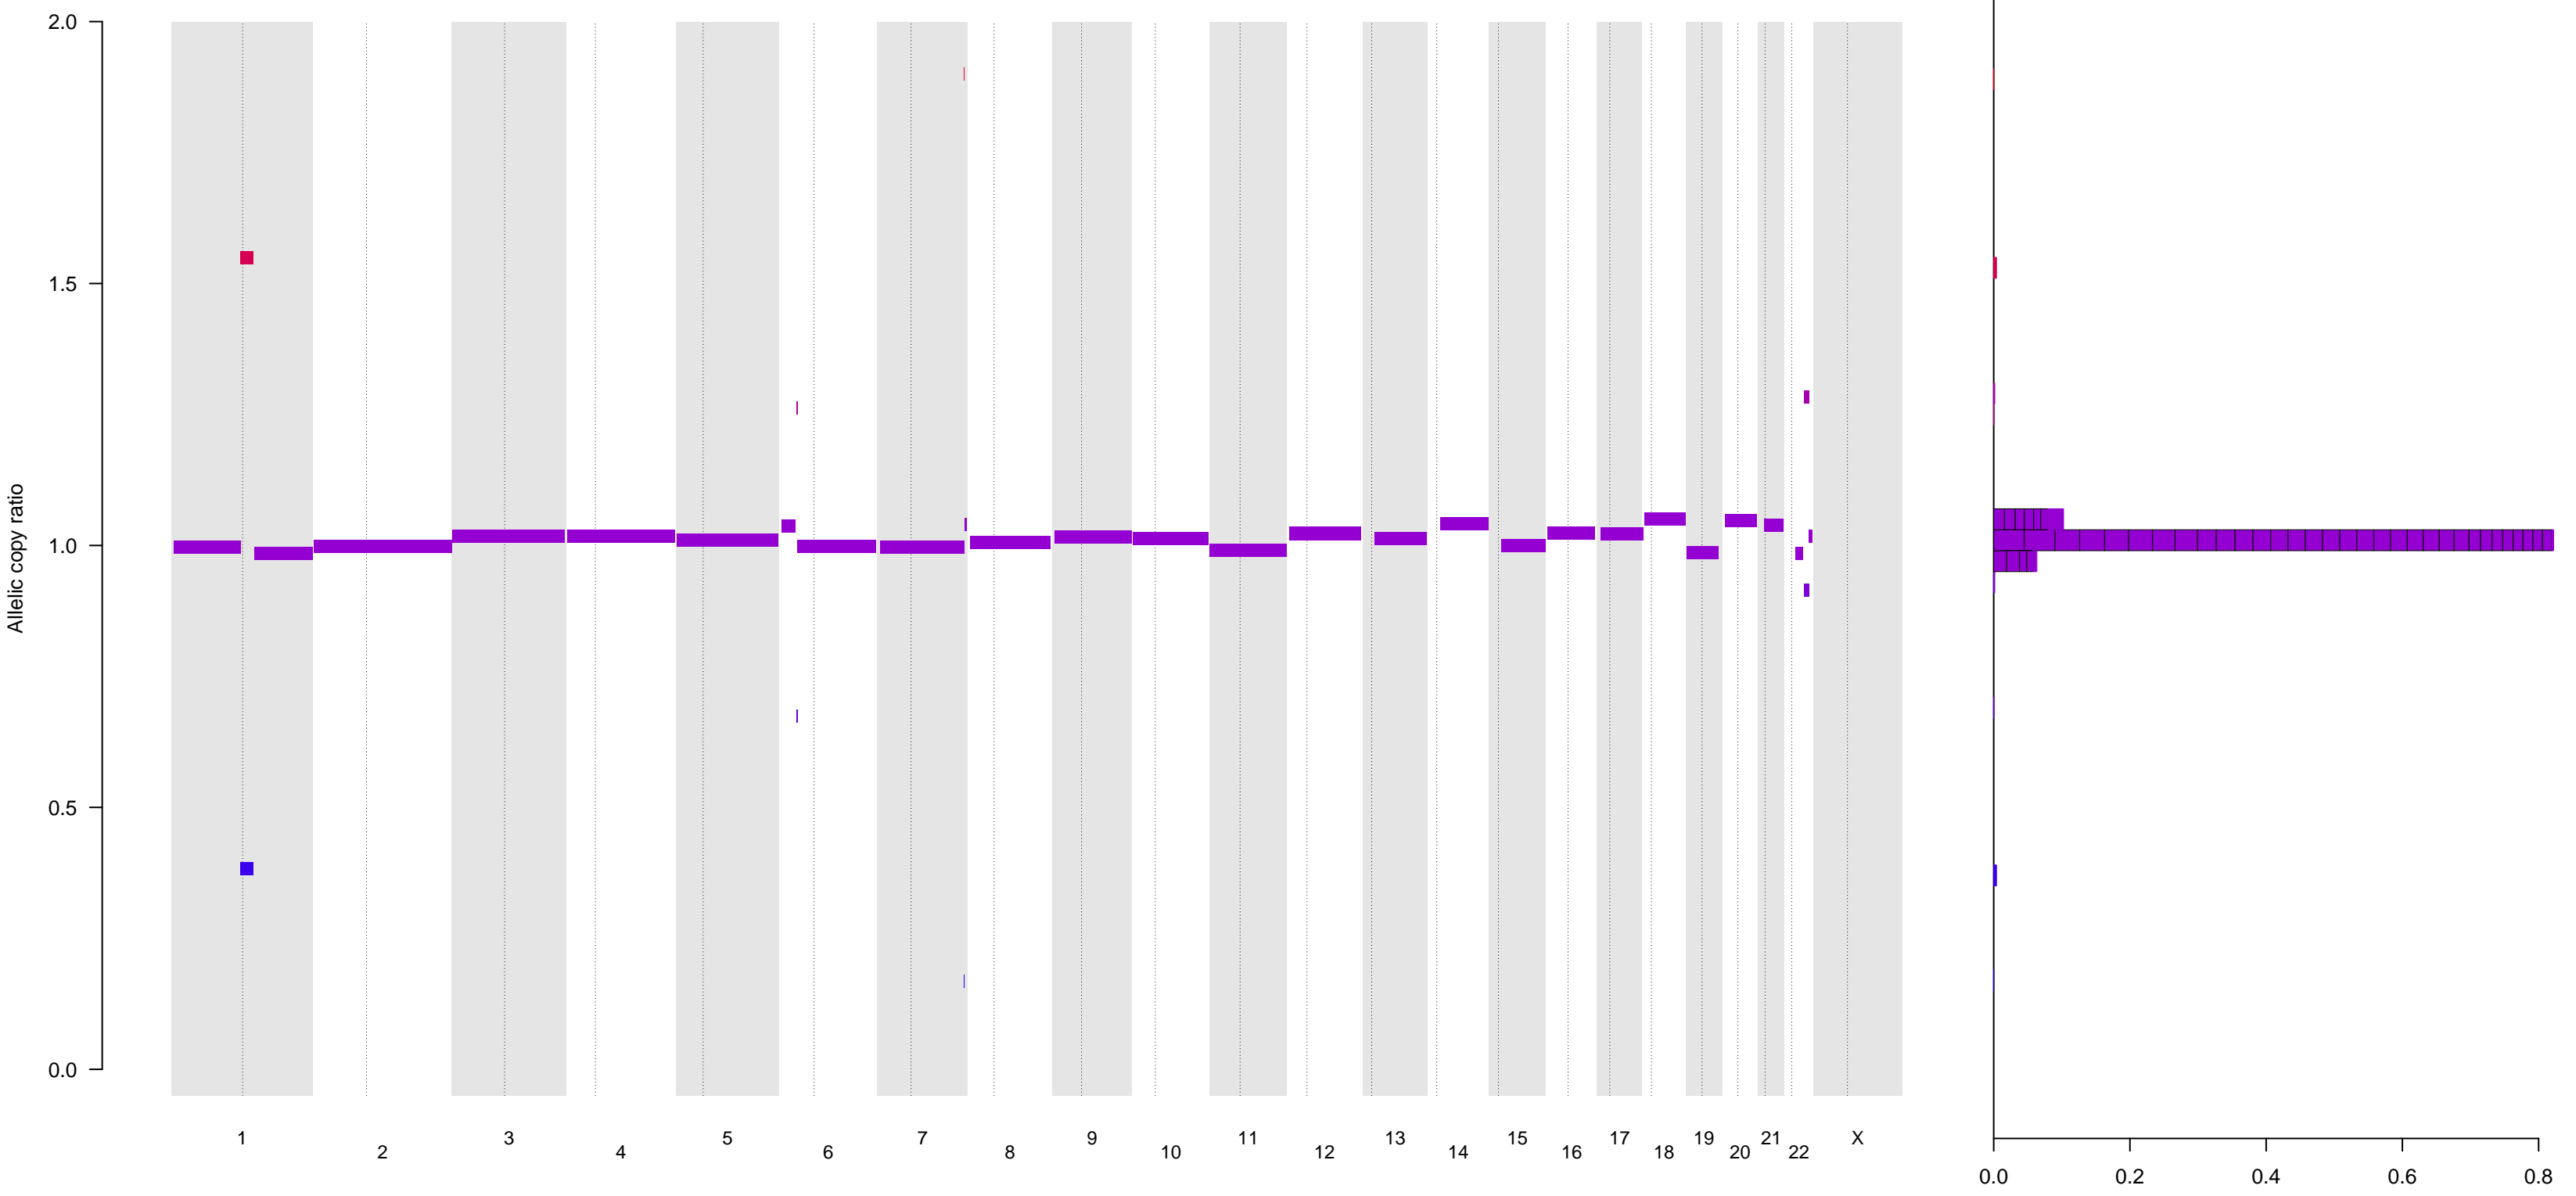

purity( $\hat{\alpha}$ ) = 0.29, ploidy:  $\hat{\tau} = 1.93$ ,  $\hat{\tau}_g = 2.01$   
 $\theta_z = 0$ ,  $\theta_0 = 1.369$ , WGD=0  
 SCNA LL = -156.21, SSNV LL = -7848.91, SCNA Ev = -29.60161

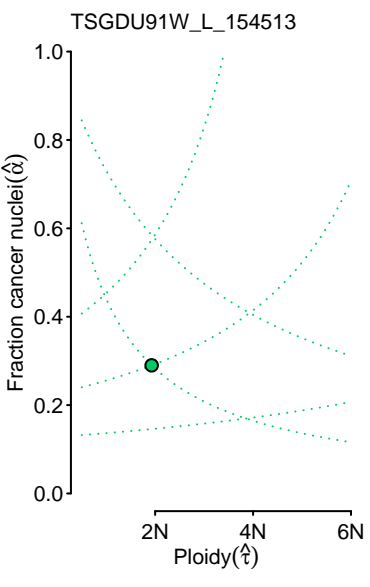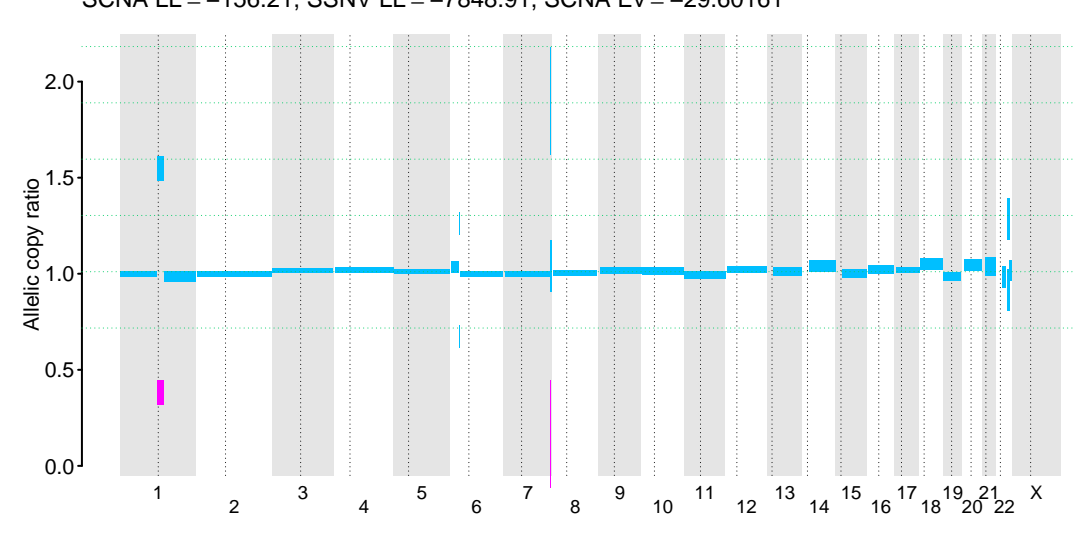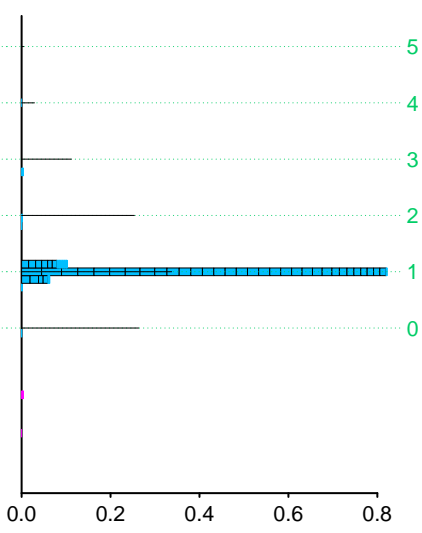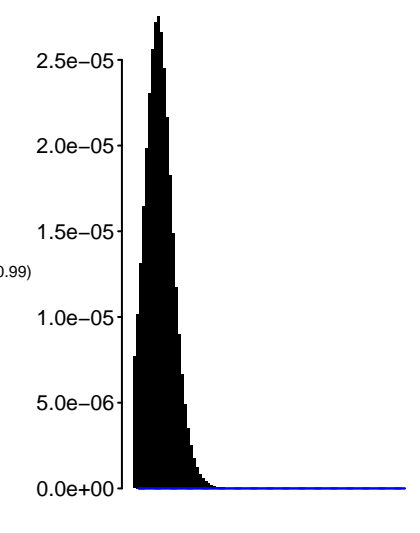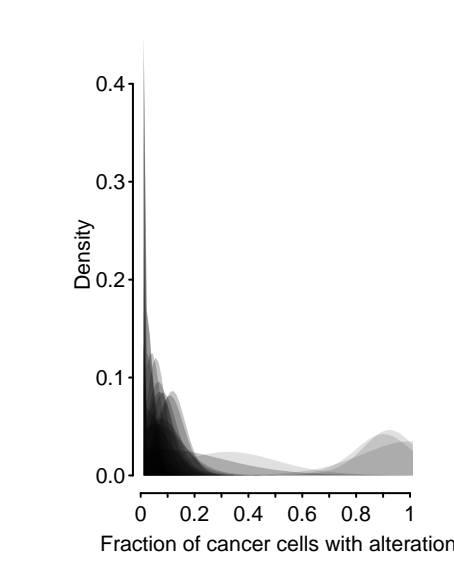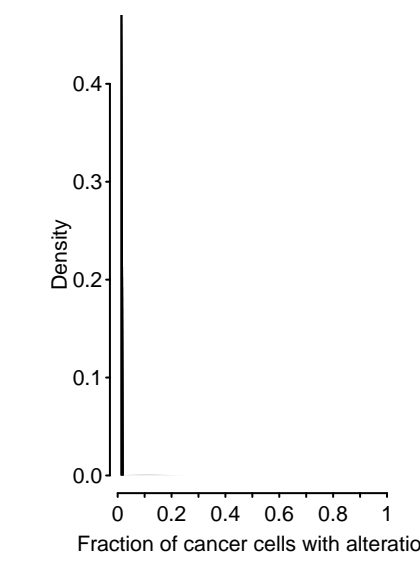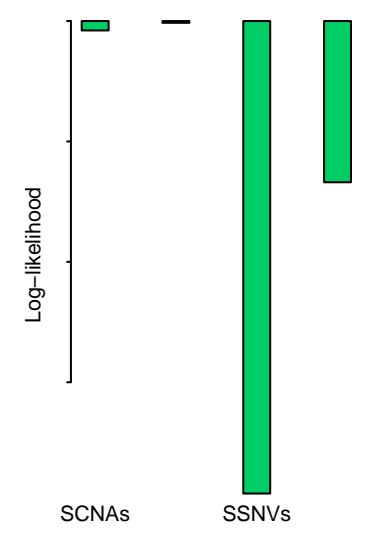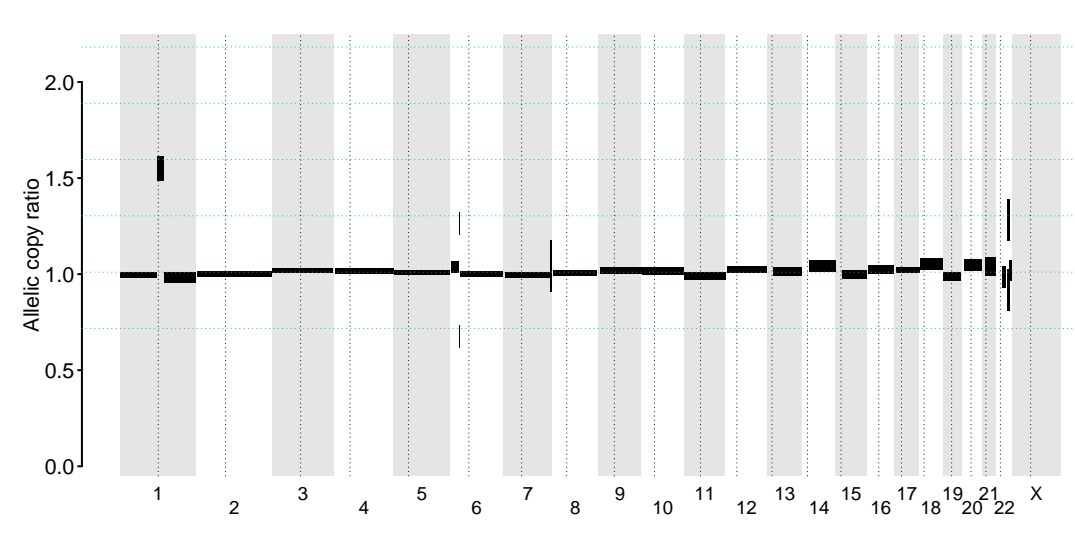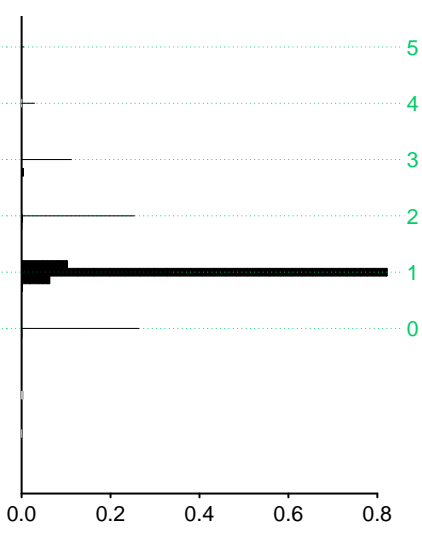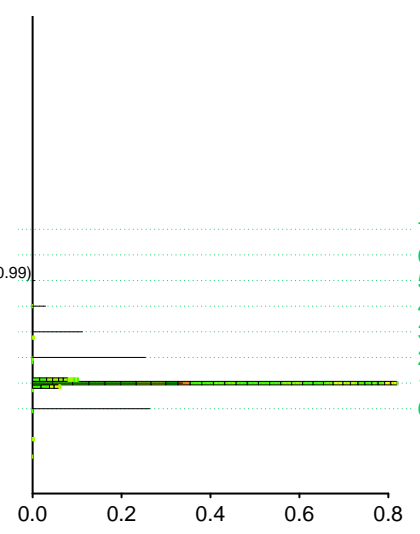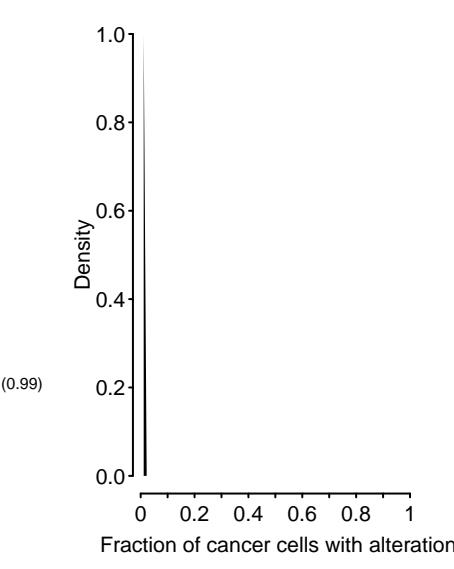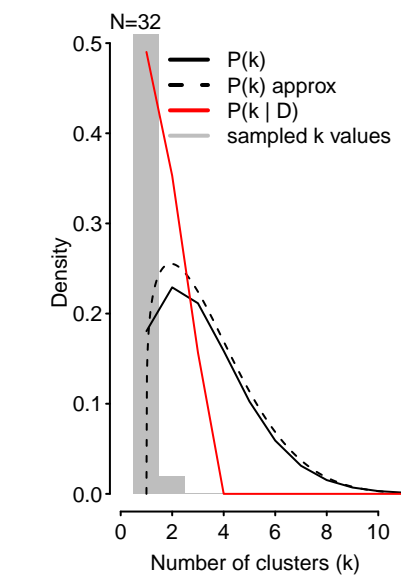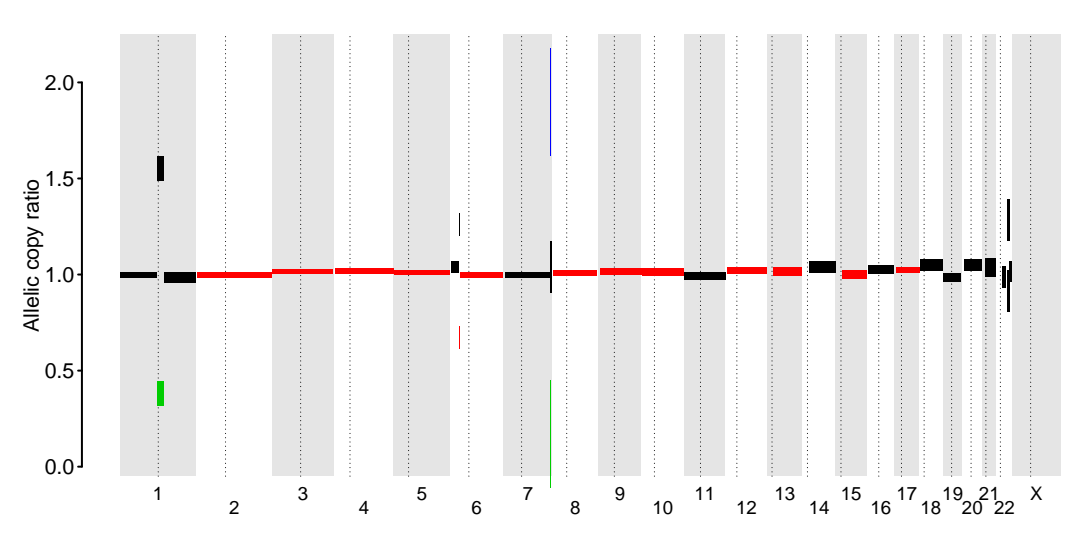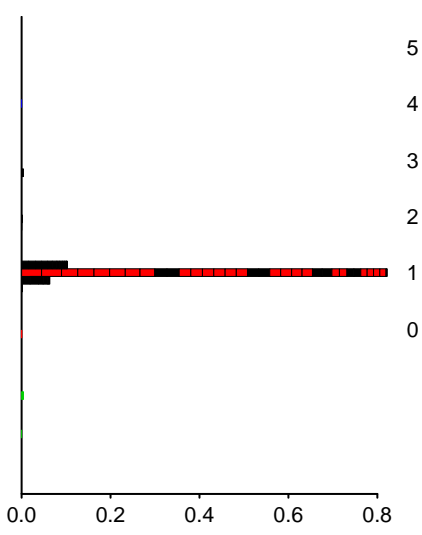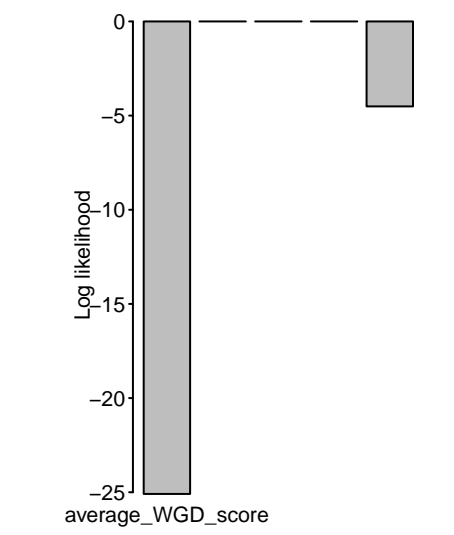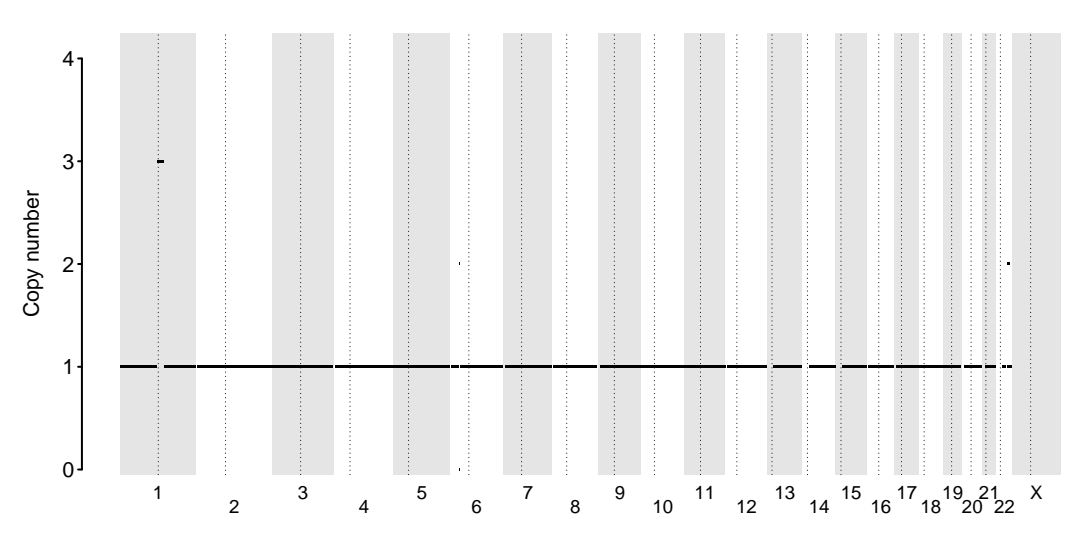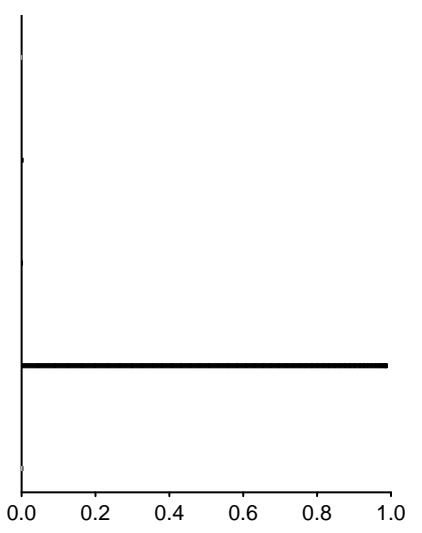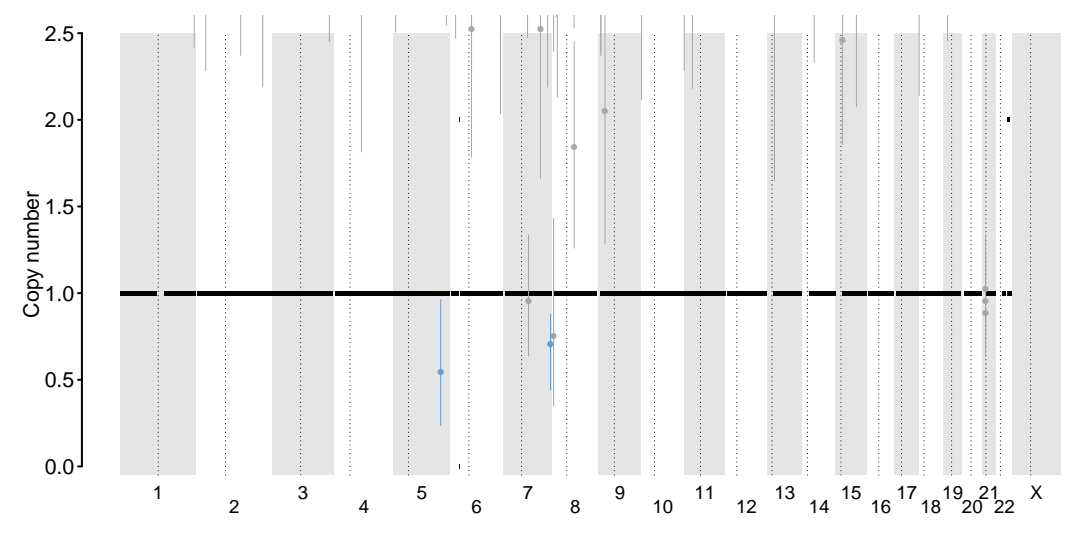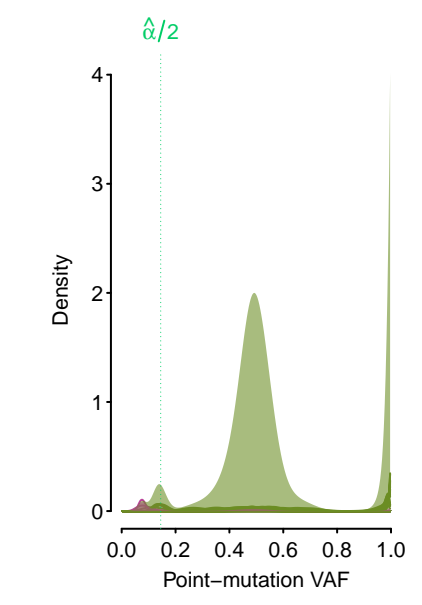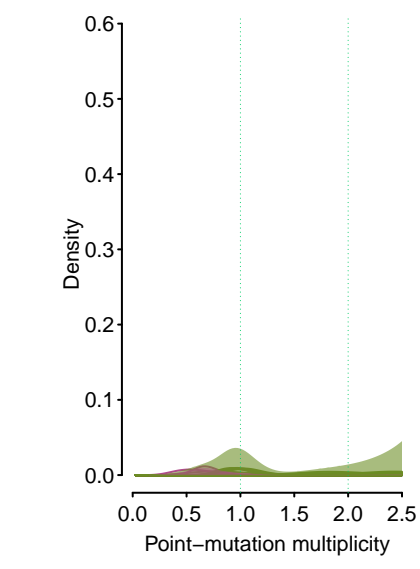

Sample 94

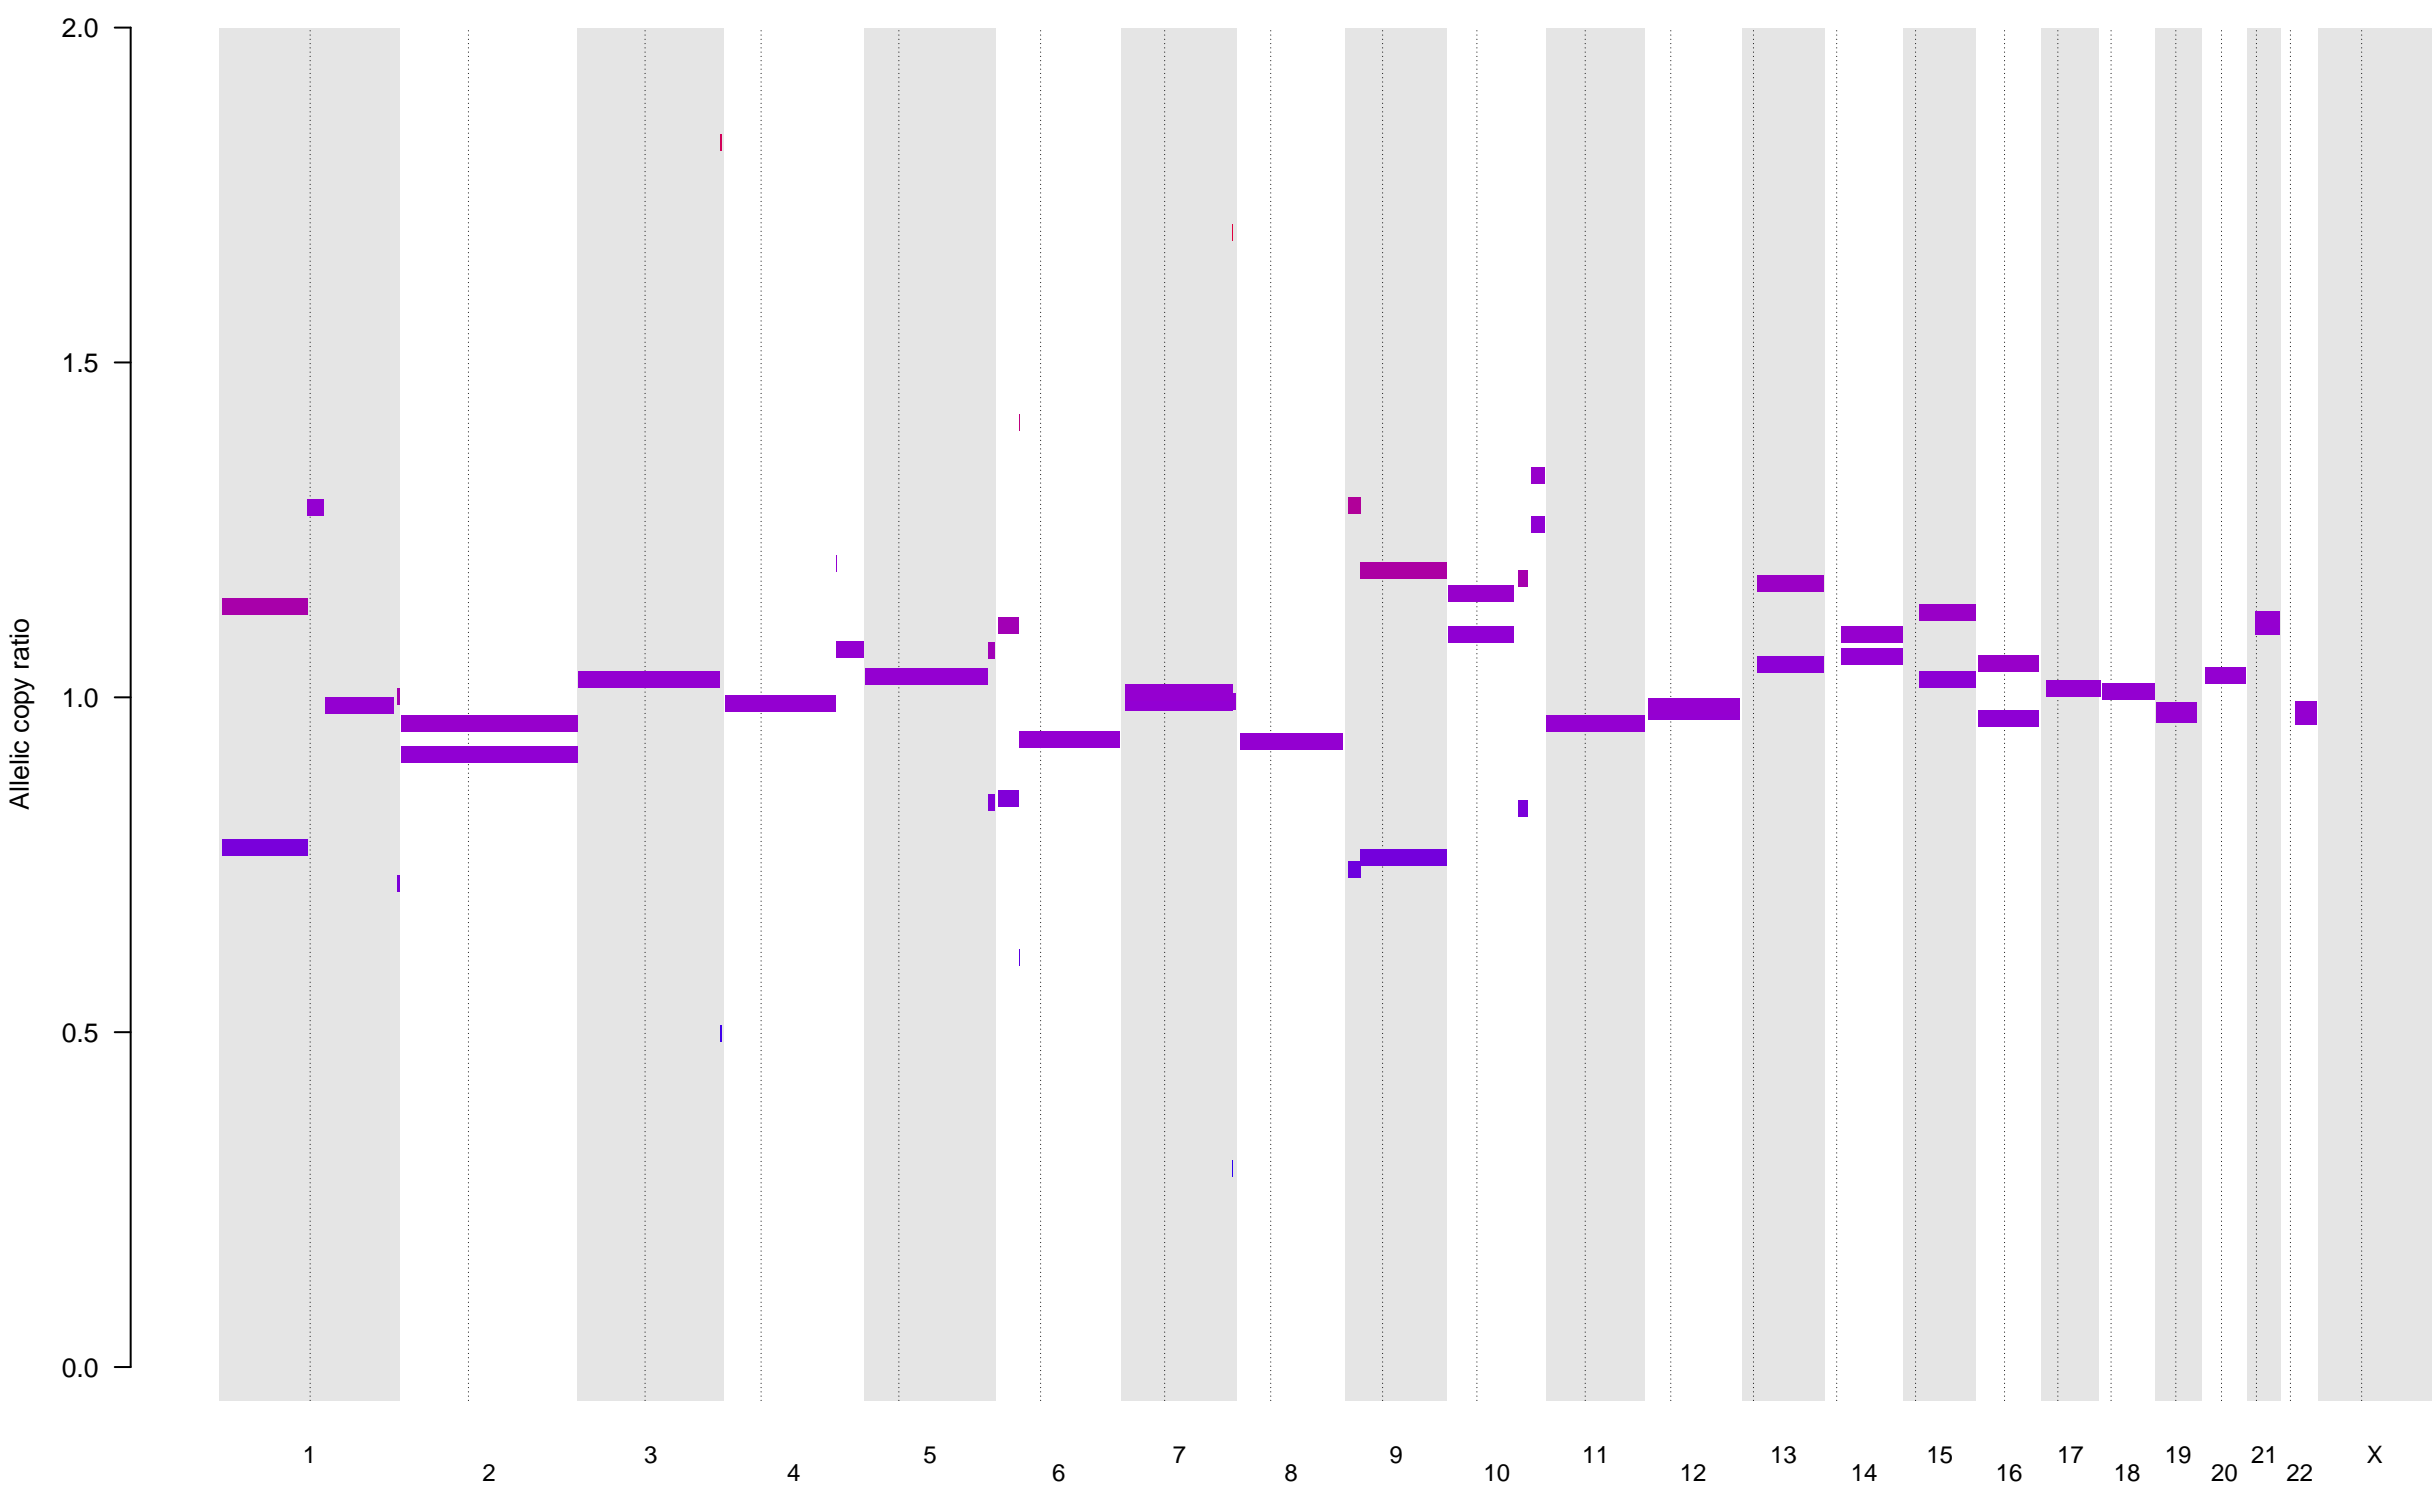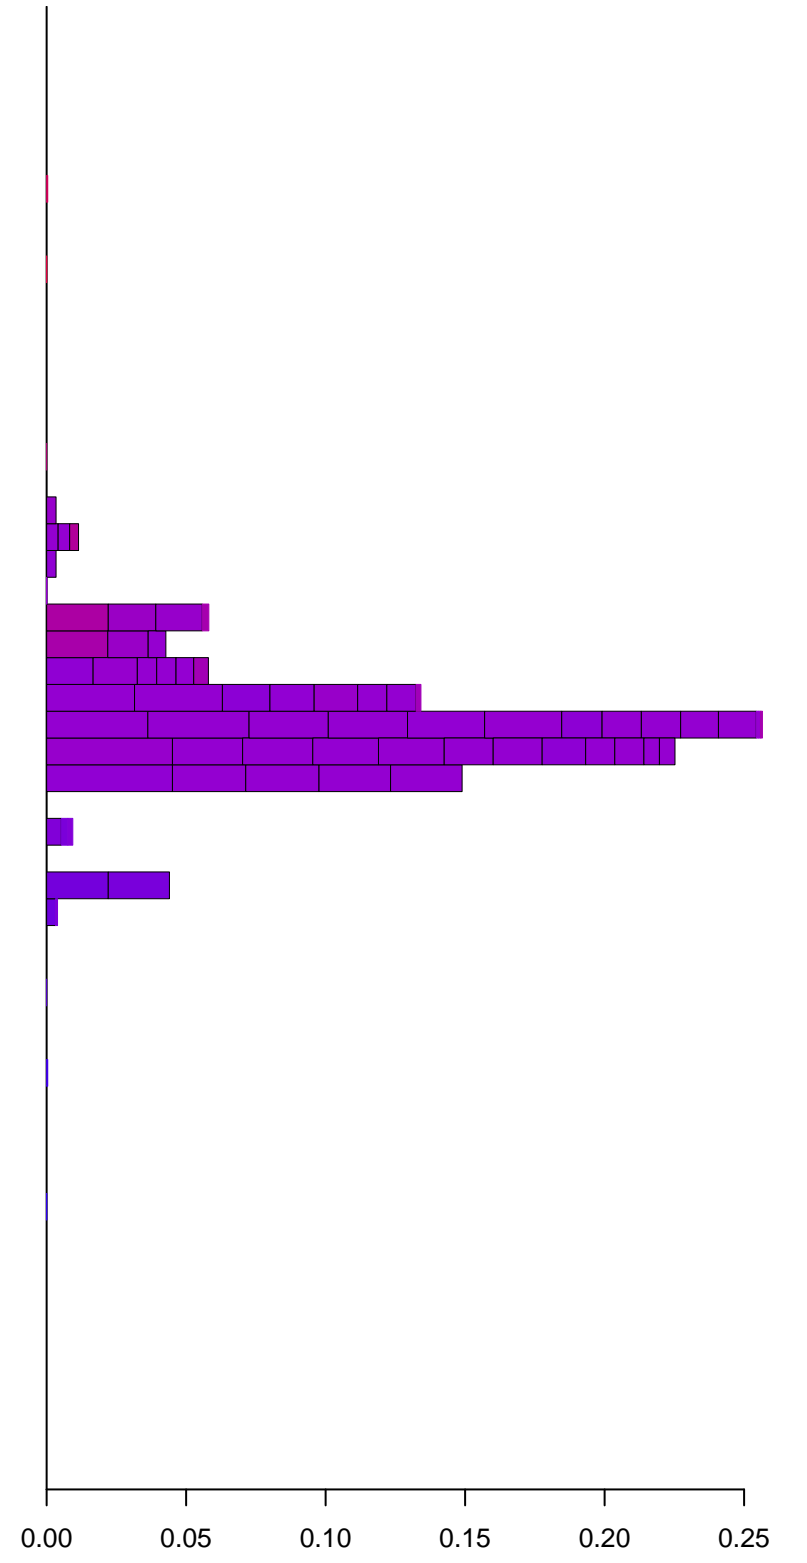



$\hat{\alpha} = 0.14$ , purity( $\hat{\alpha}$ ) = 0.14, ploidy:  $\hat{t} = 3.83$ ,  $\hat{t}_g = 3.85$   
 $\theta_z = 0.13$ ,  $\theta_a = 1.813$ , WGD=1  
 SCNA LL = -324.17, SSNV LL = -5690.34, SCNA Ev = -110.9126

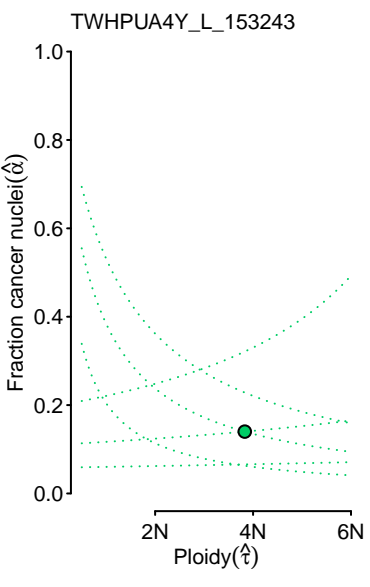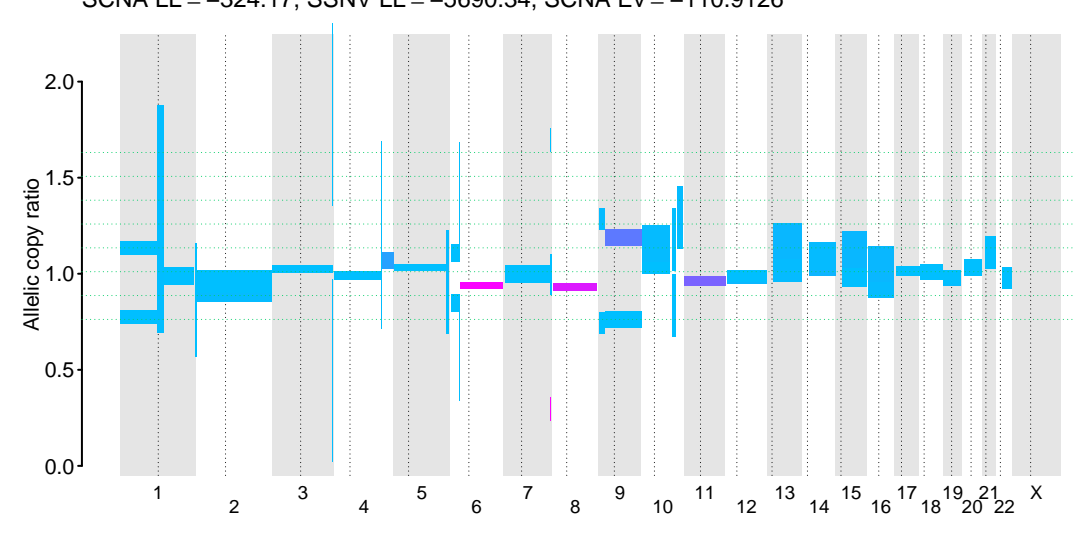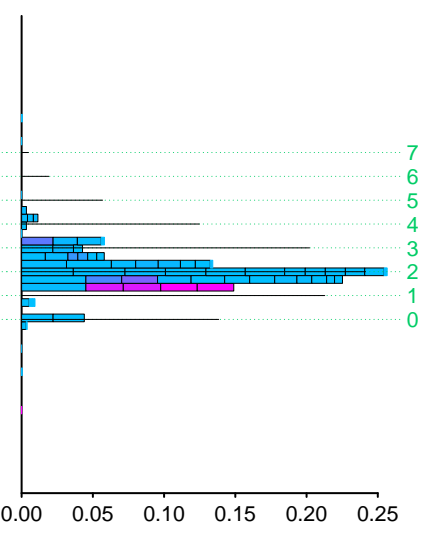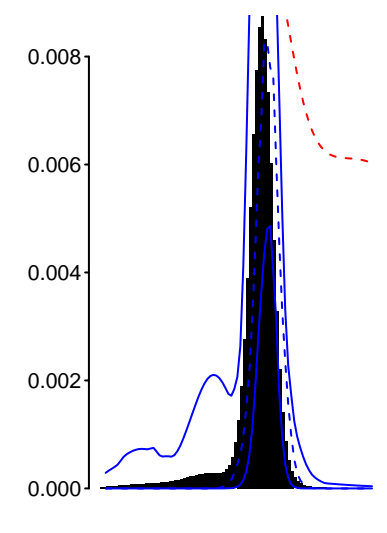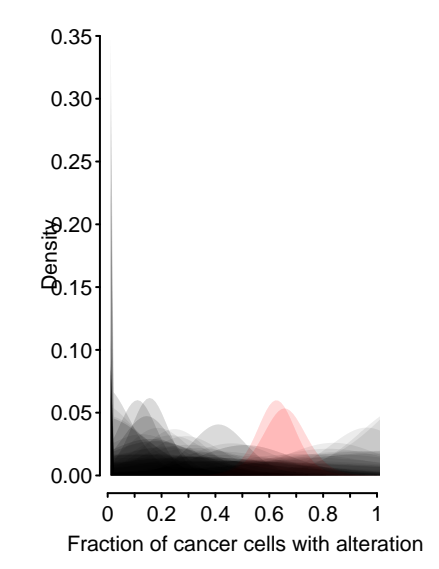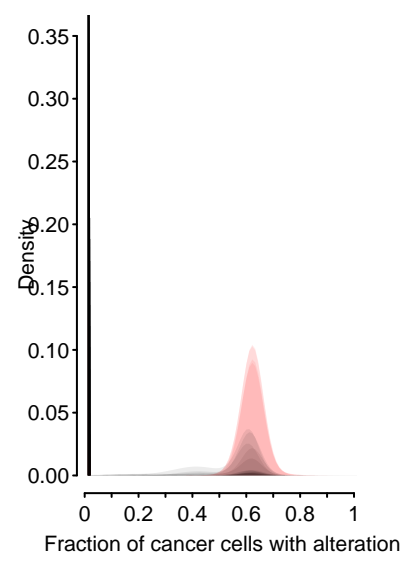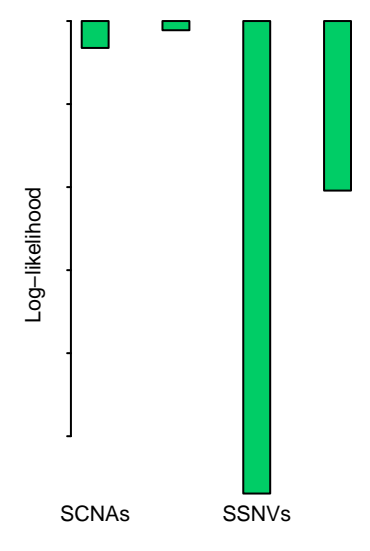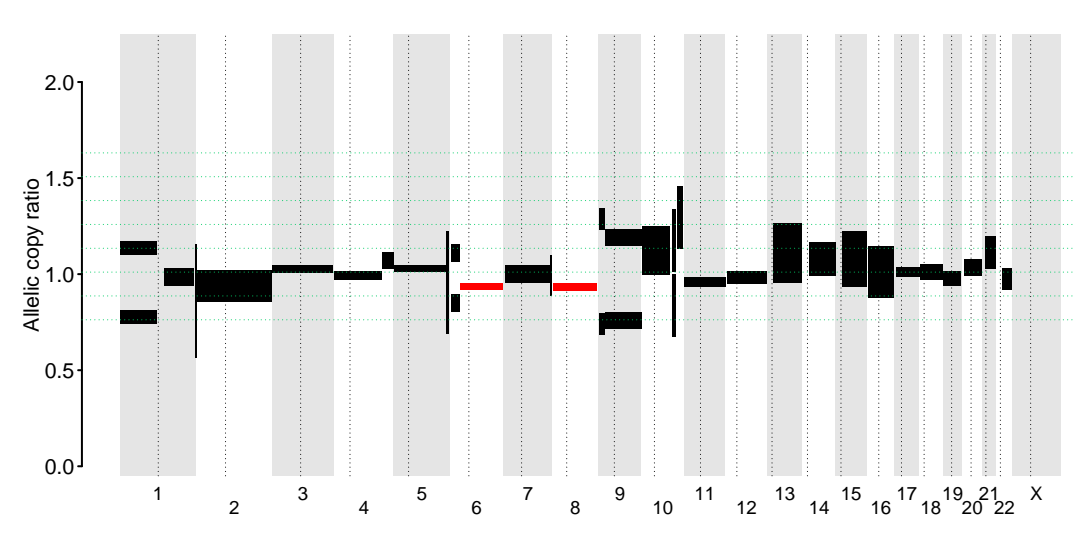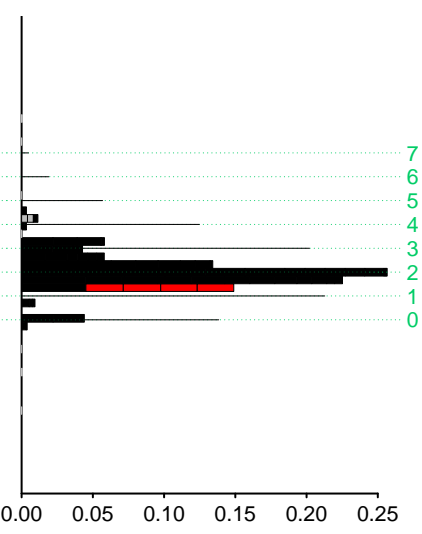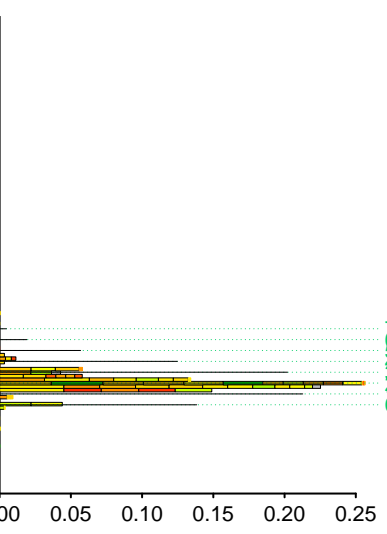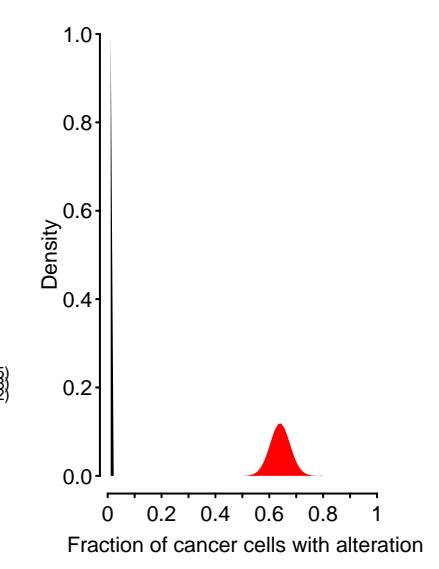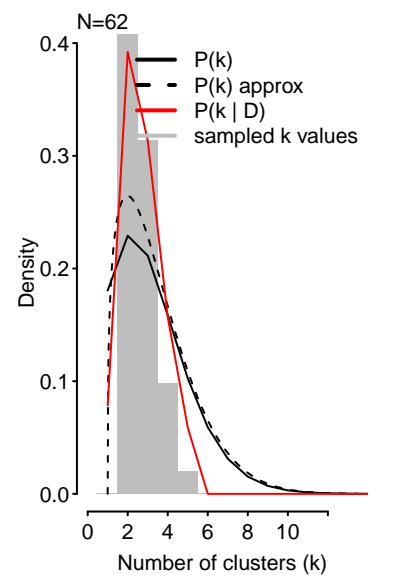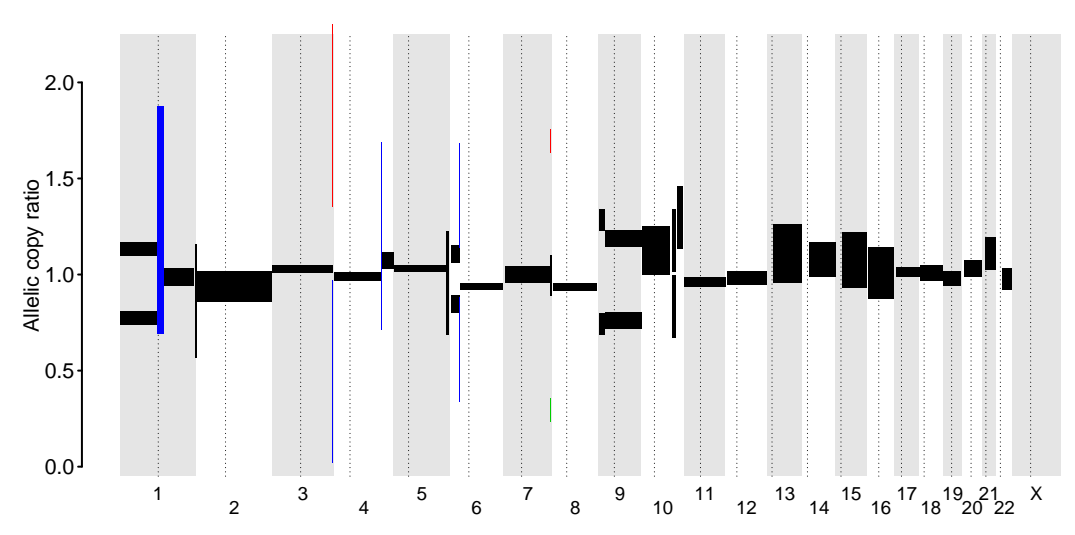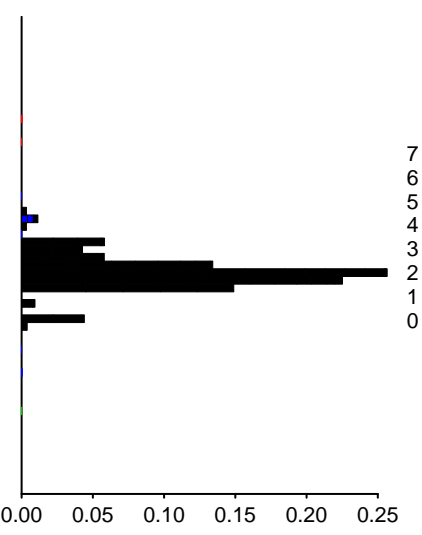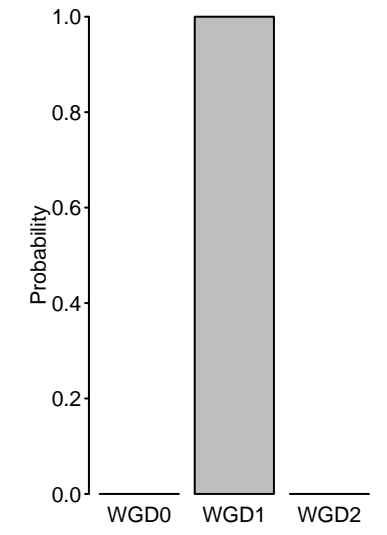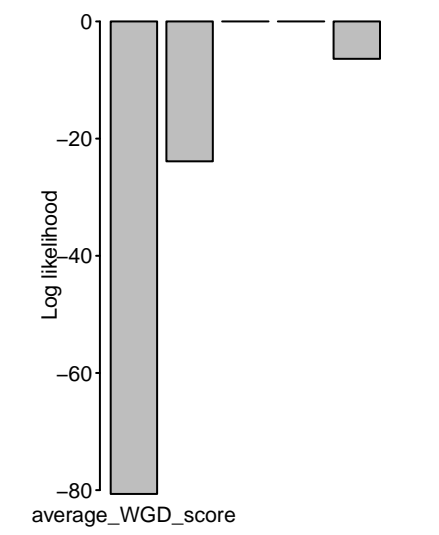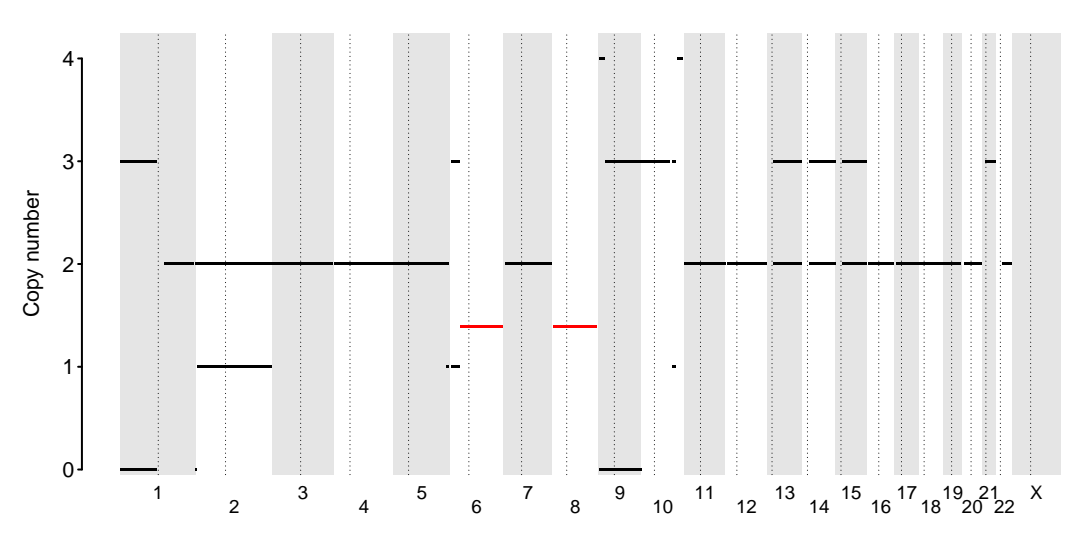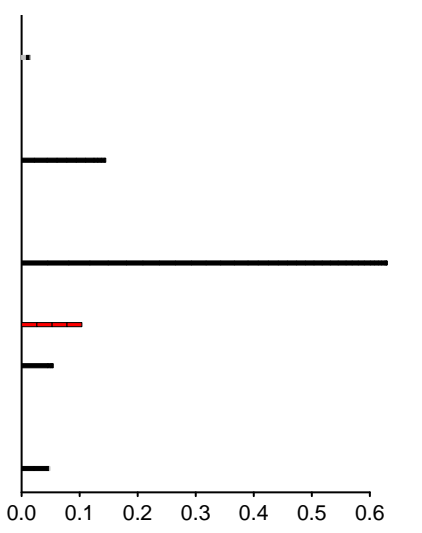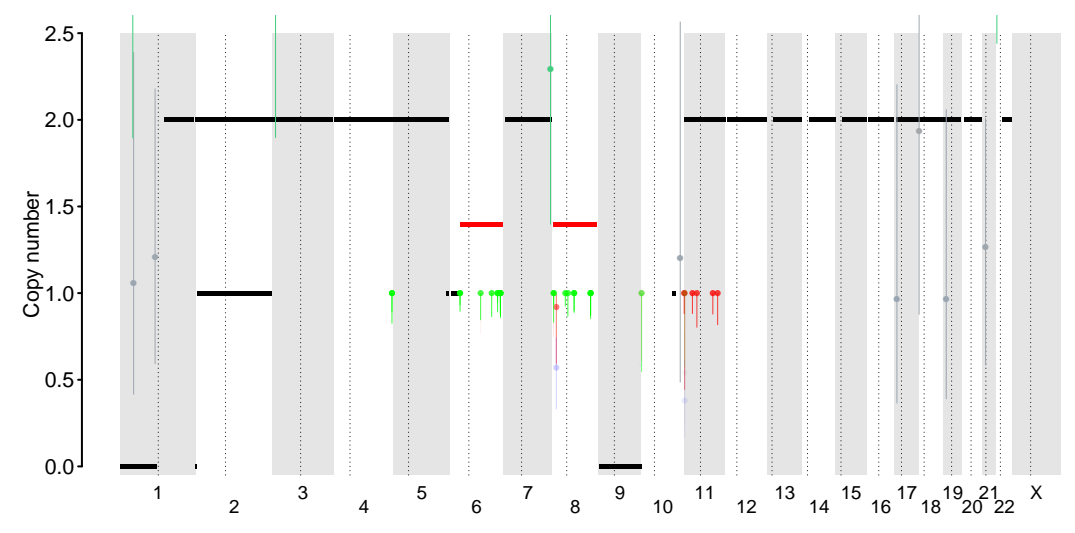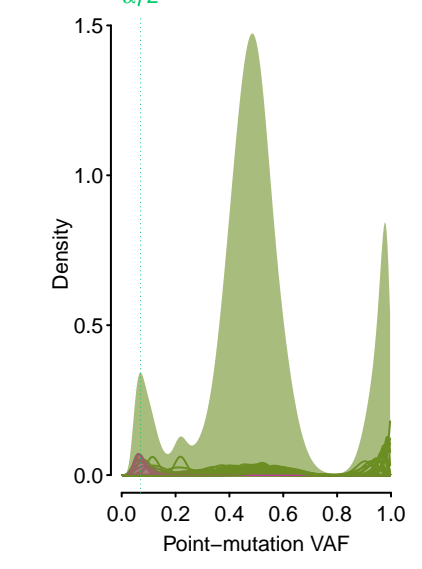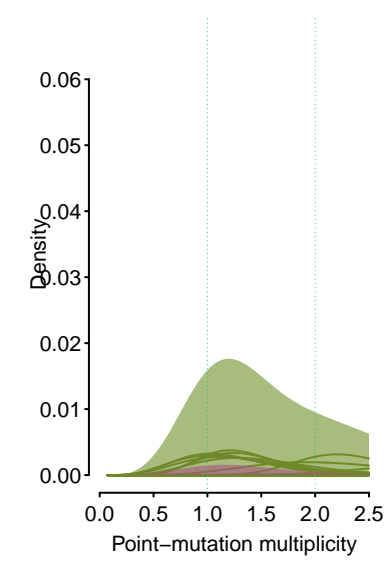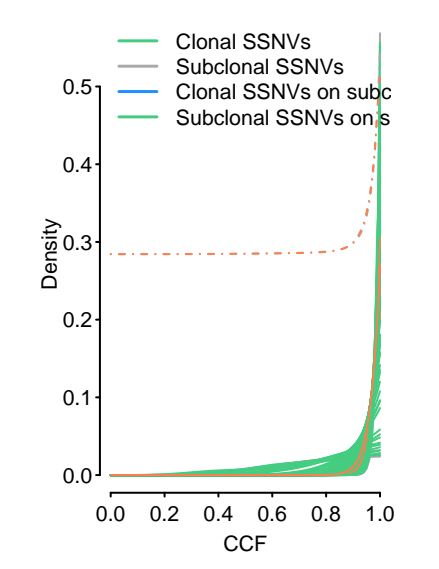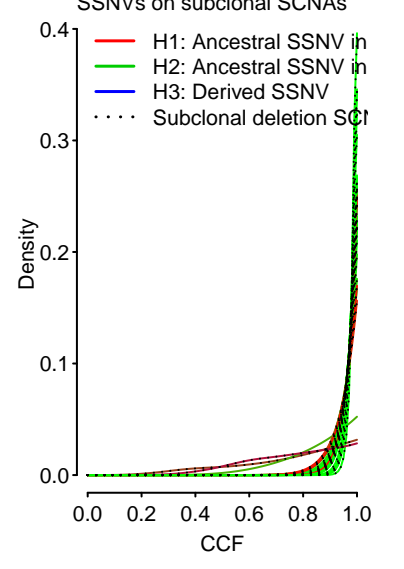



Sample 96

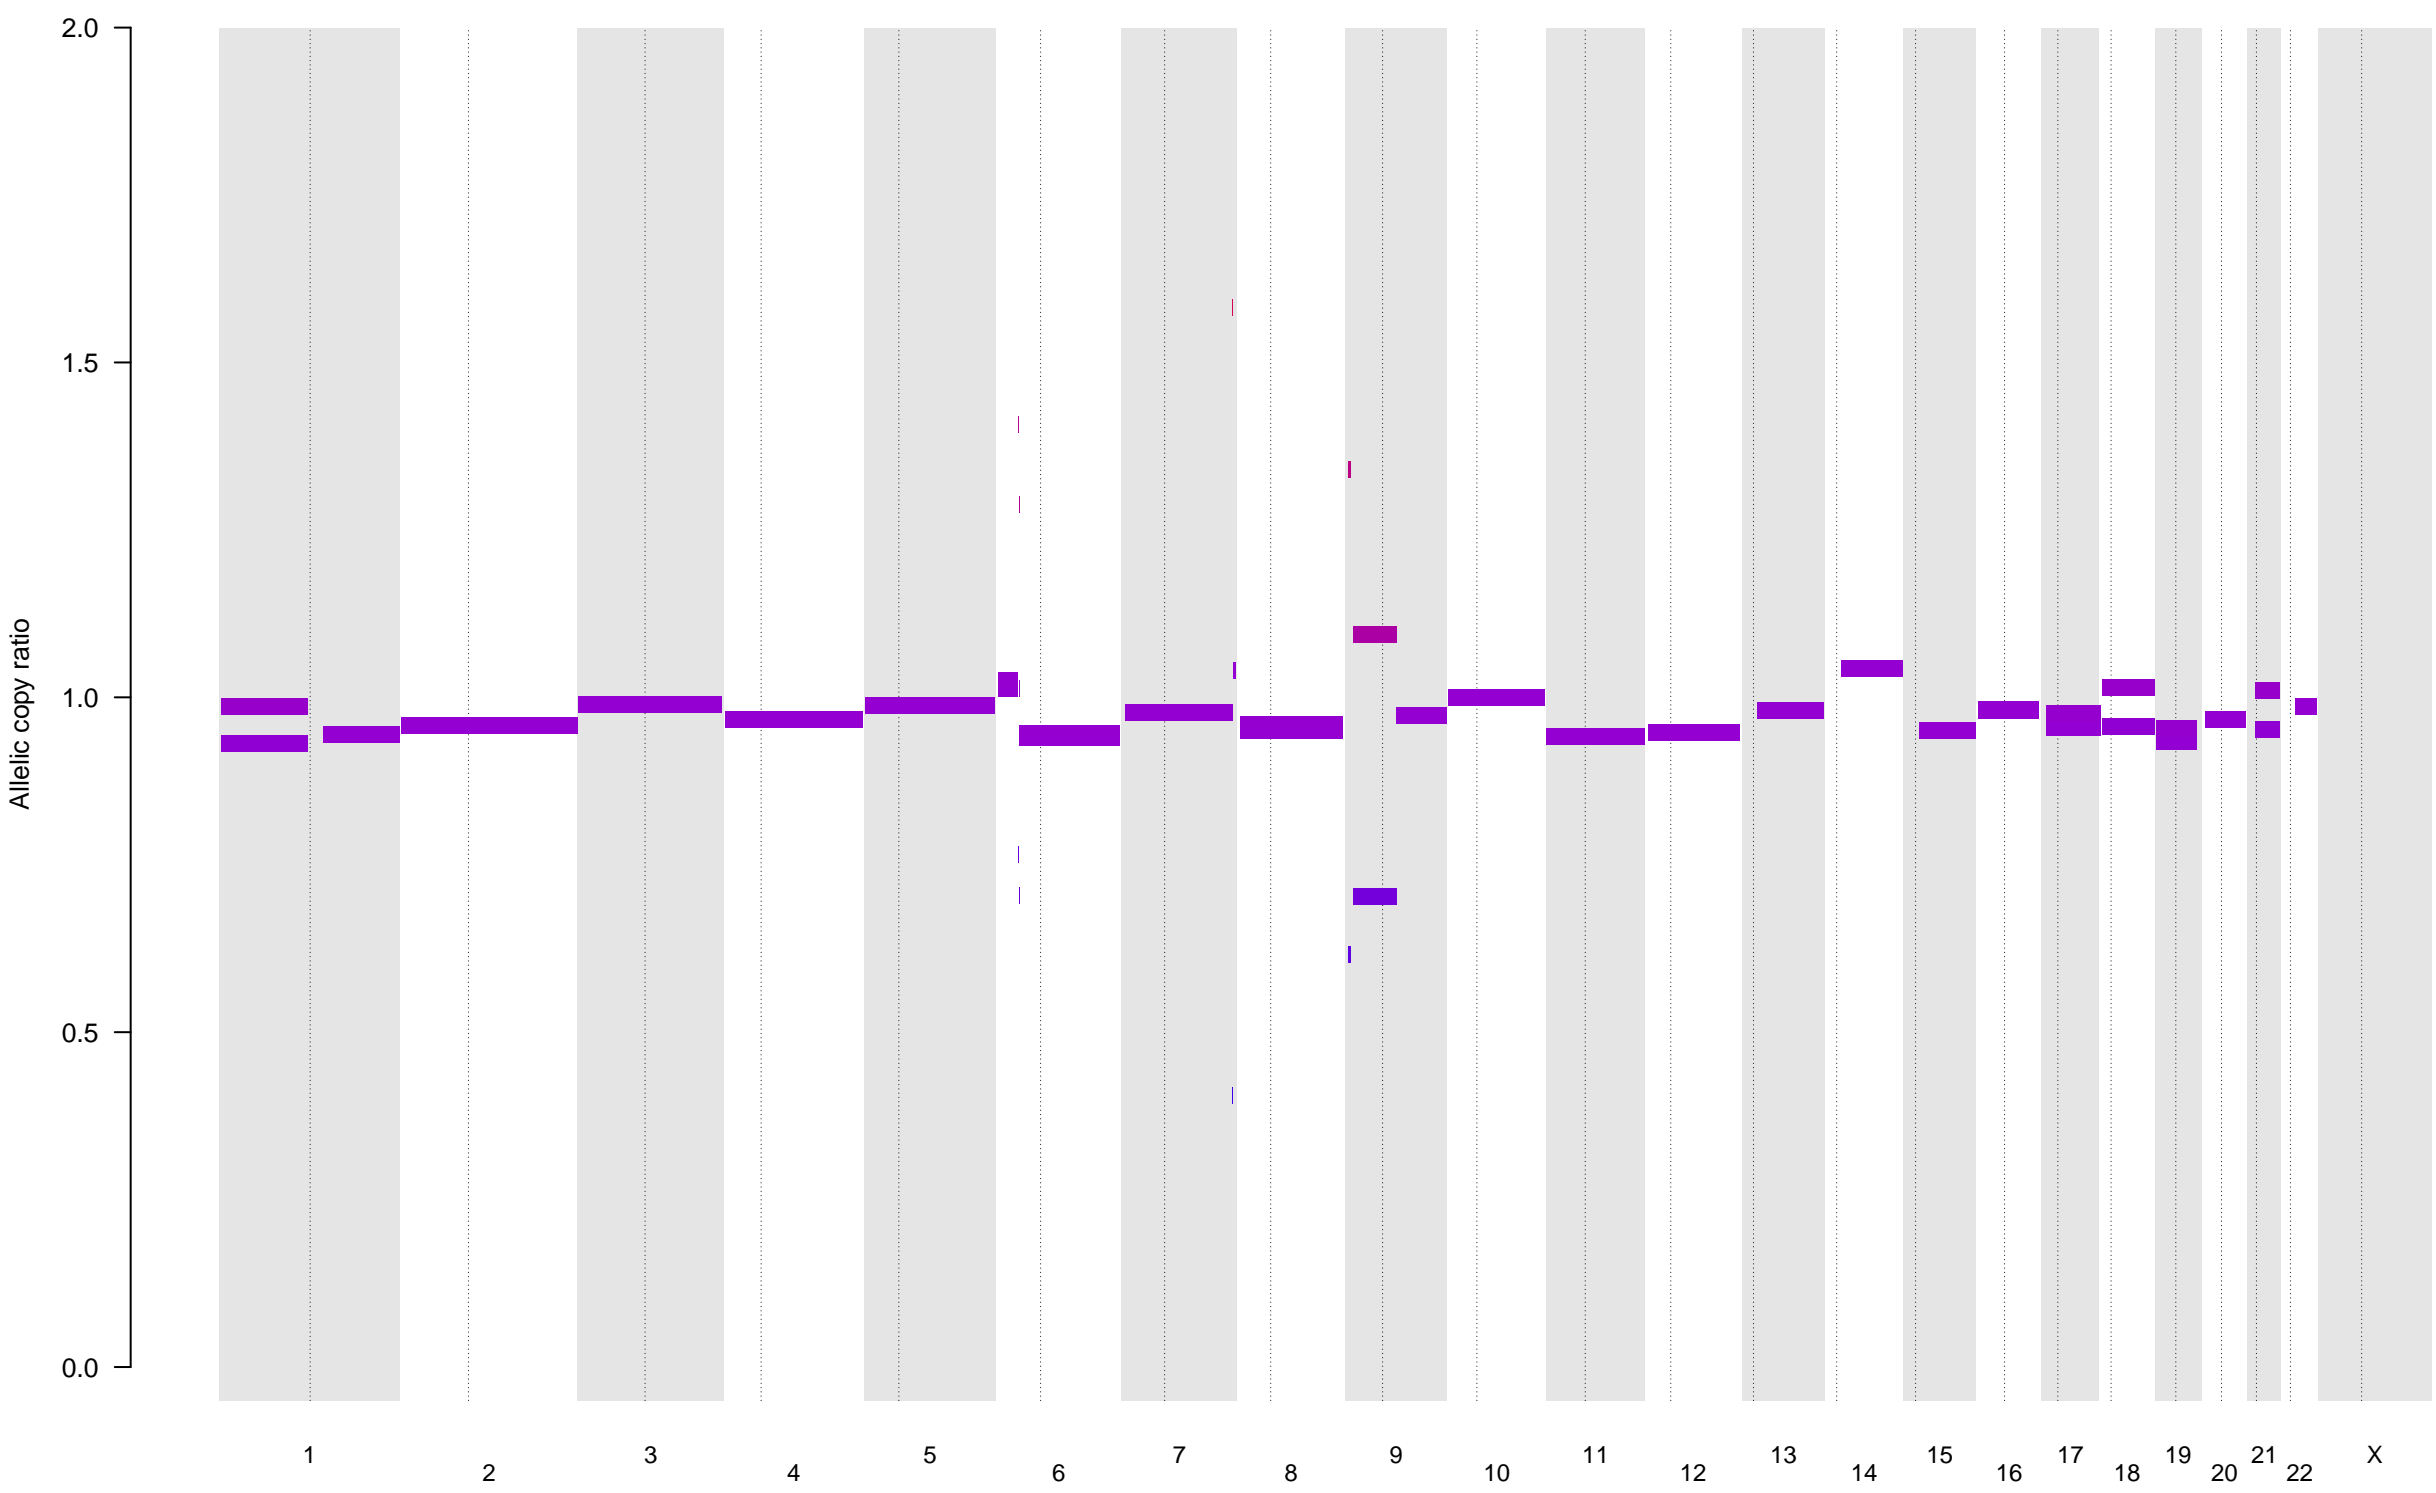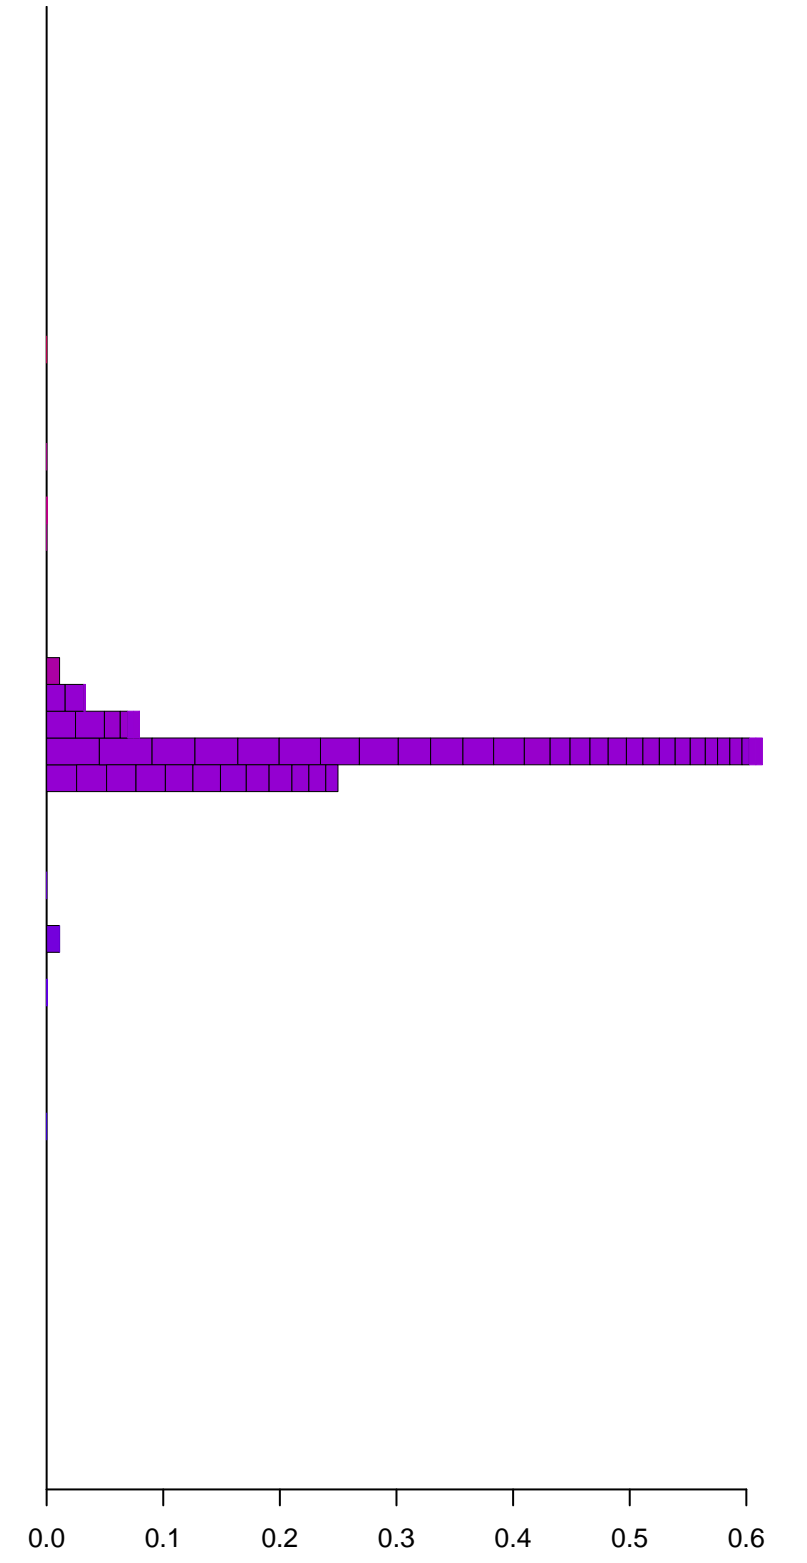

purity( $\hat{\alpha}$ ) = 0.25, ploidy:  $\hat{t} = 2.31$ ,  $\hat{t}_g = 2$   
 $\theta_z = 0.01$ ,  $\theta_a = 1.272$ , WGD=0  
 SCNA LL = -215.5, SSNV LL = -4920.73, SCNA Ev = -33.49066

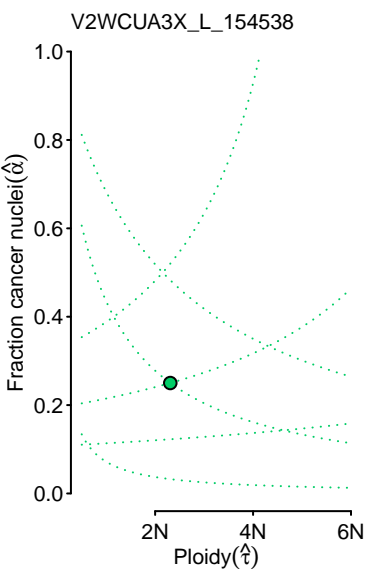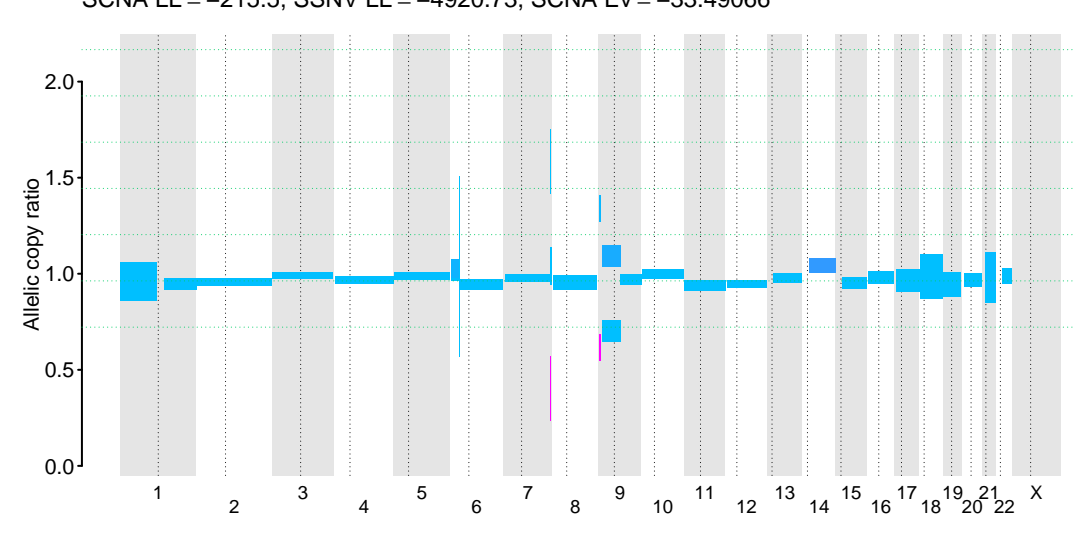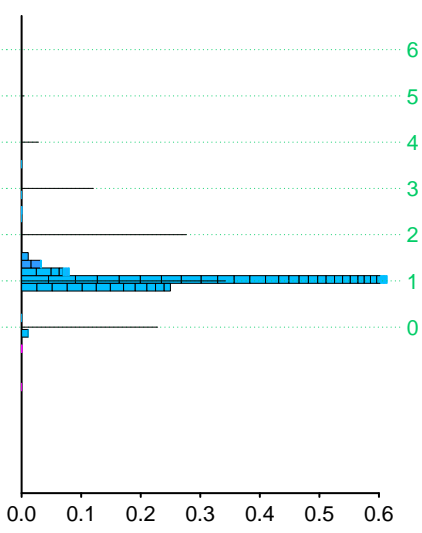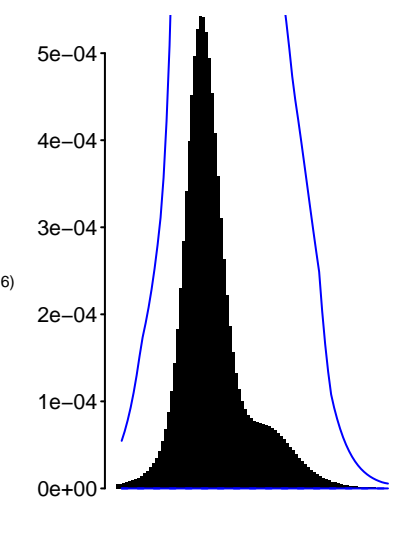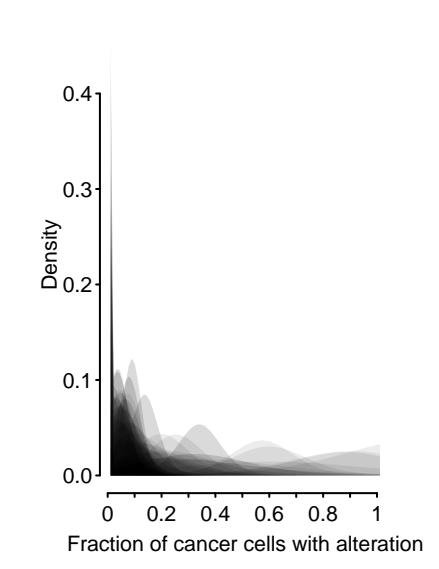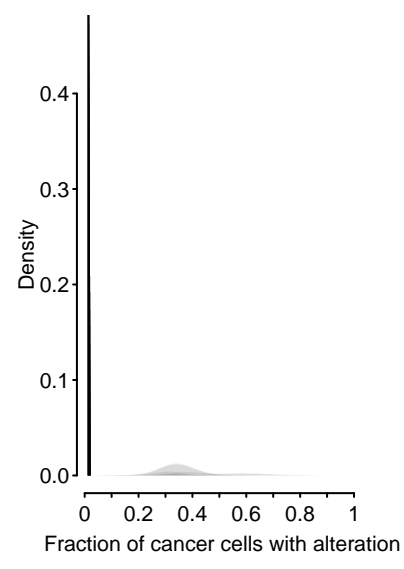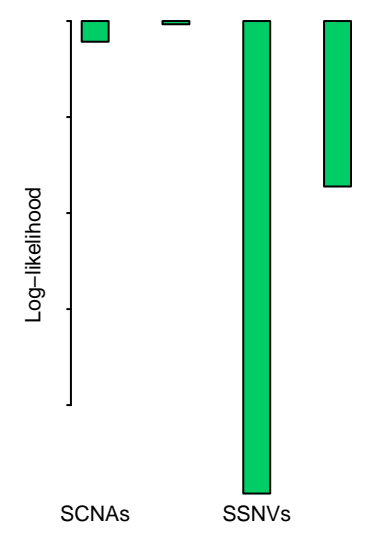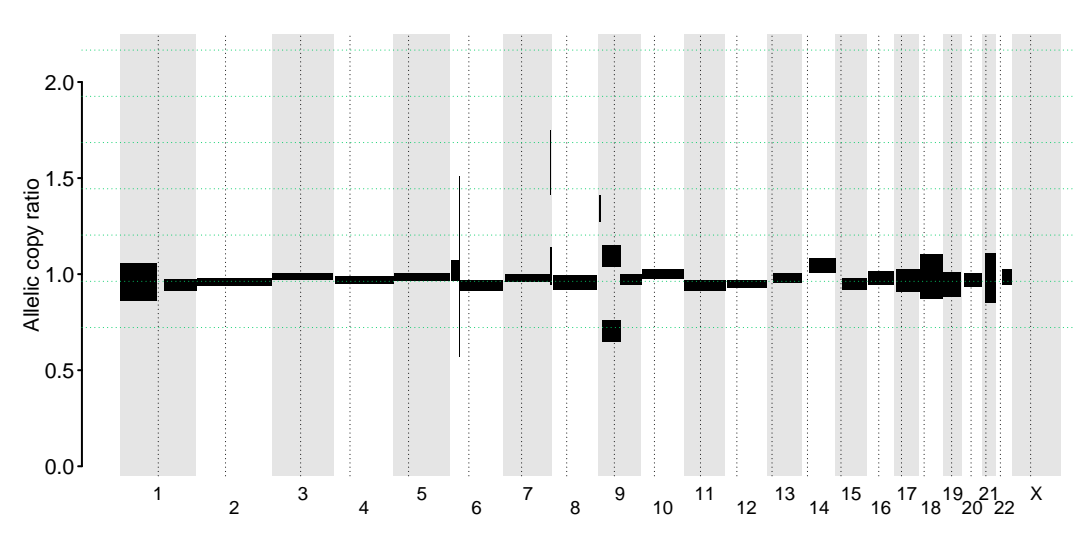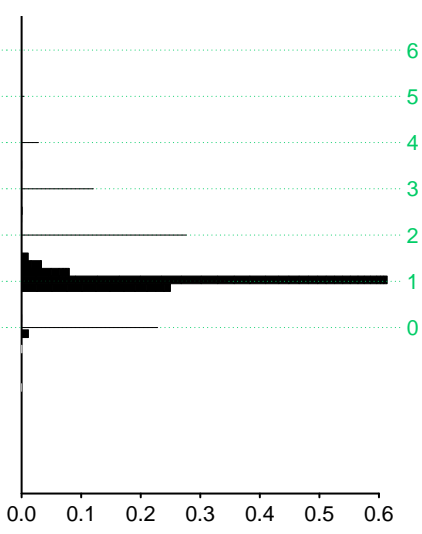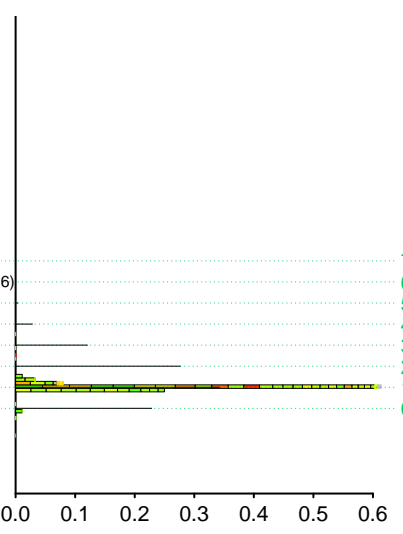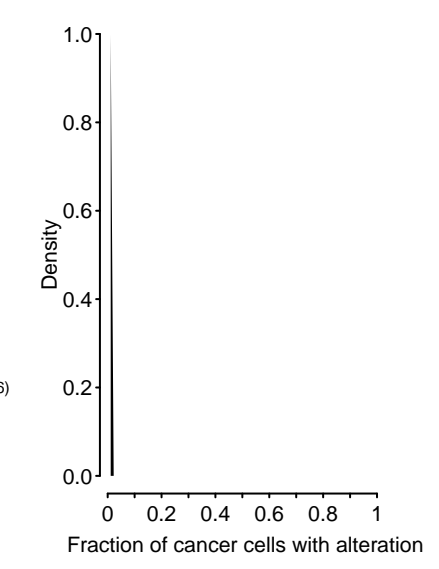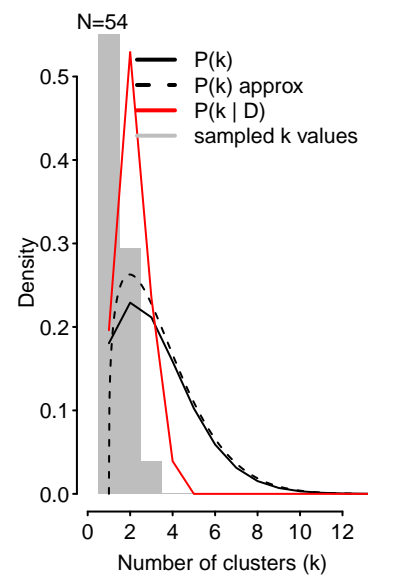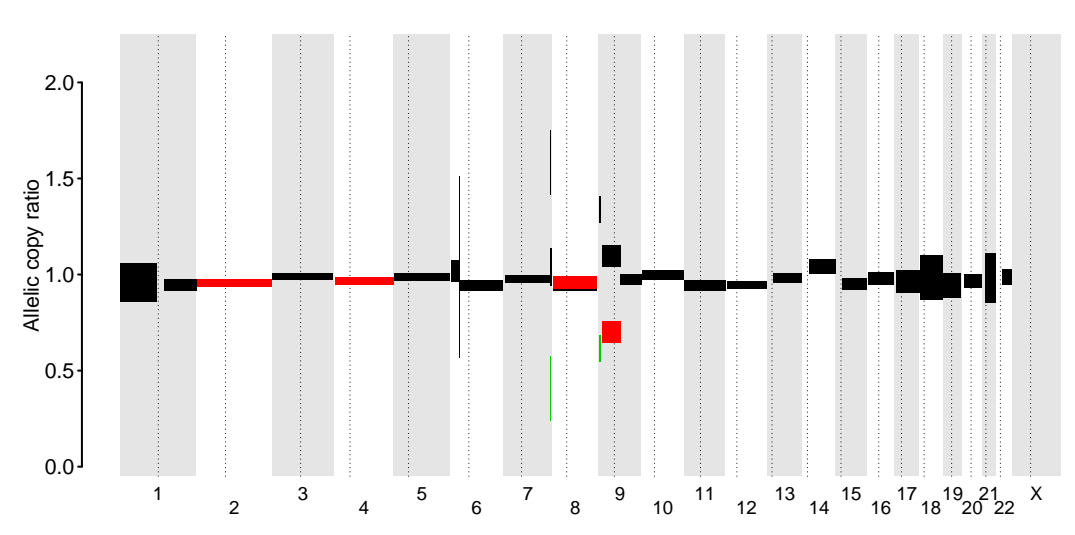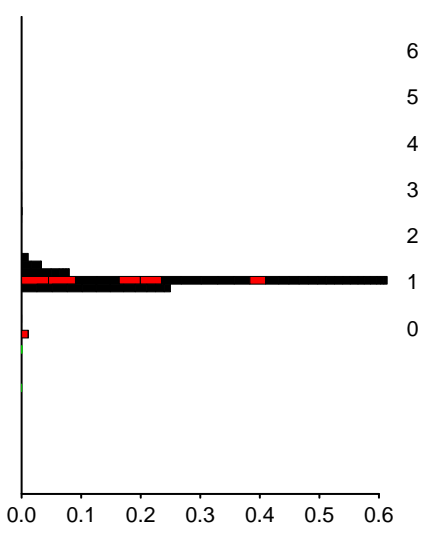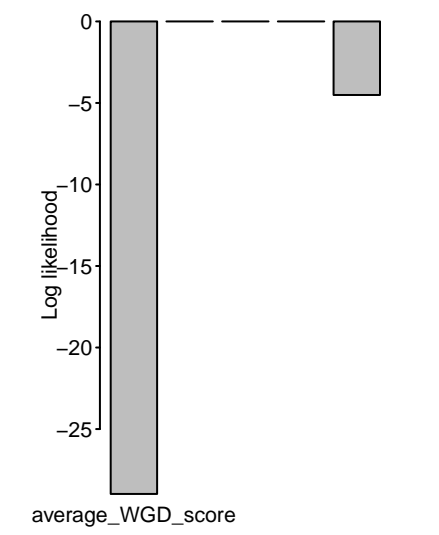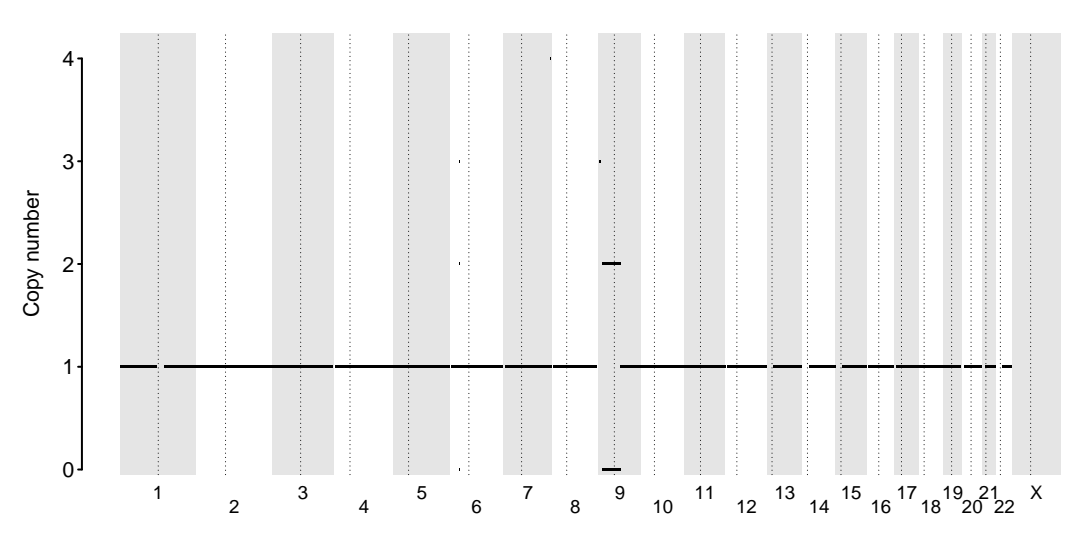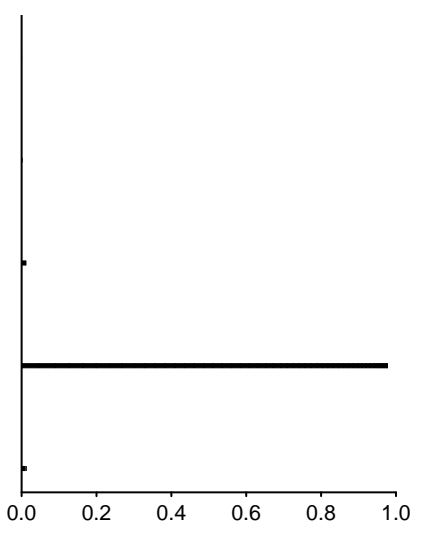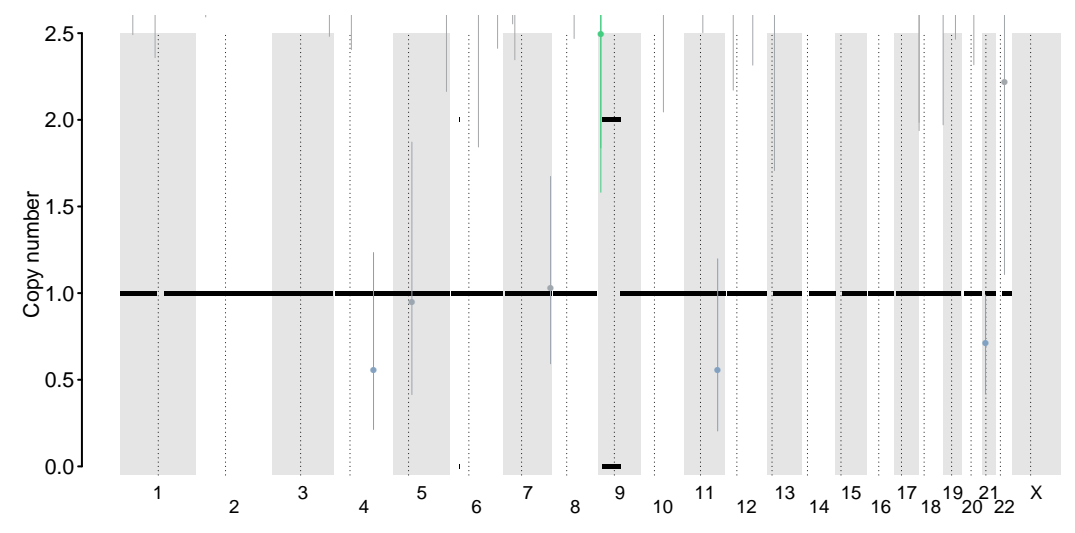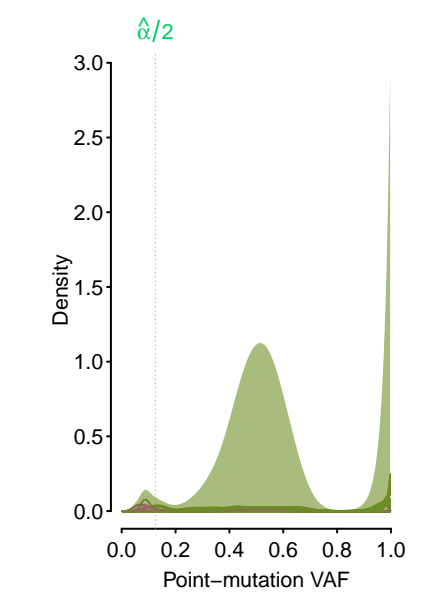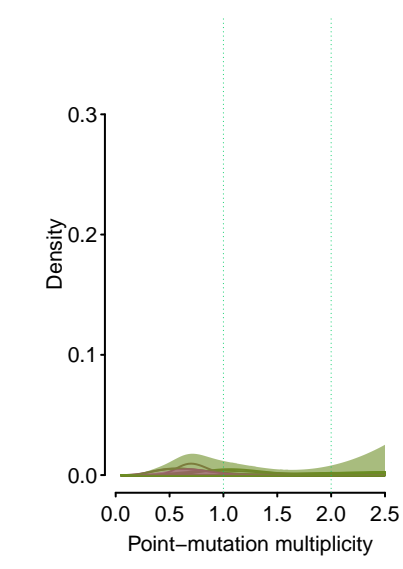

Sample 97

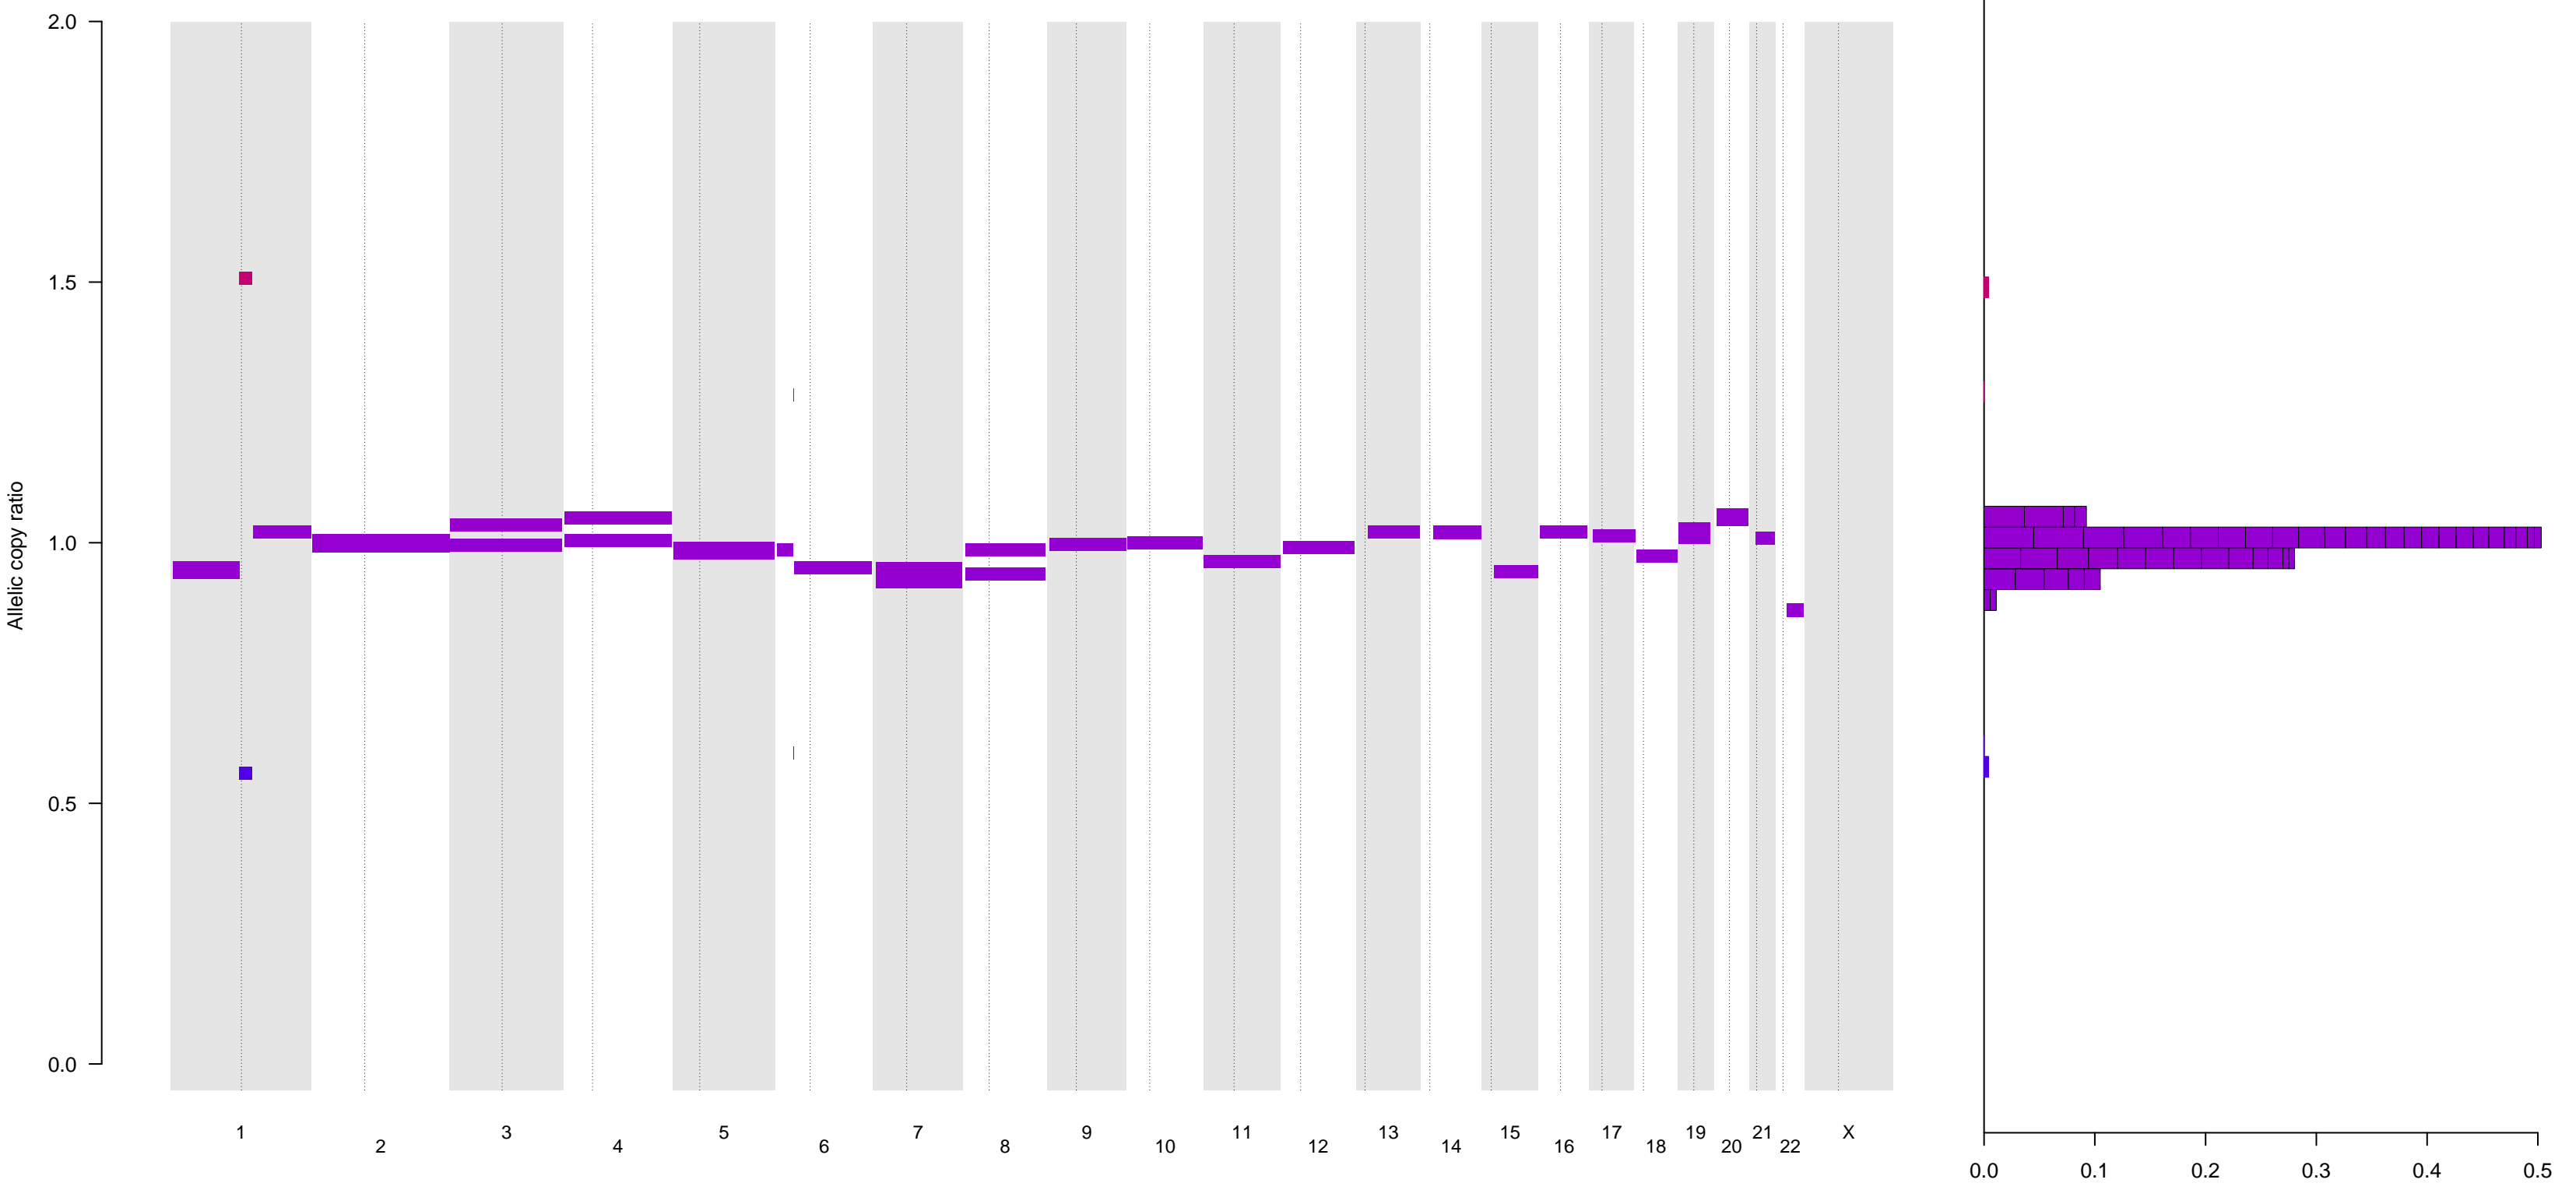

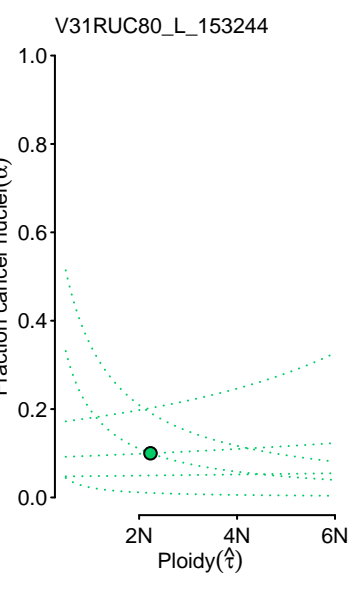

purity( $\hat{\alpha}$ ) = 0.1, ploidy:  $\hat{t} = 2.23$ ,  $\hat{t}_g = 2.03$   
 $\theta_z = 0$ ,  $\theta_0 = 1.586$ , WGD=0  
 SCNA LL = -214.98, SSNV LL = -5157.76, SCNA Ev = -48.89119

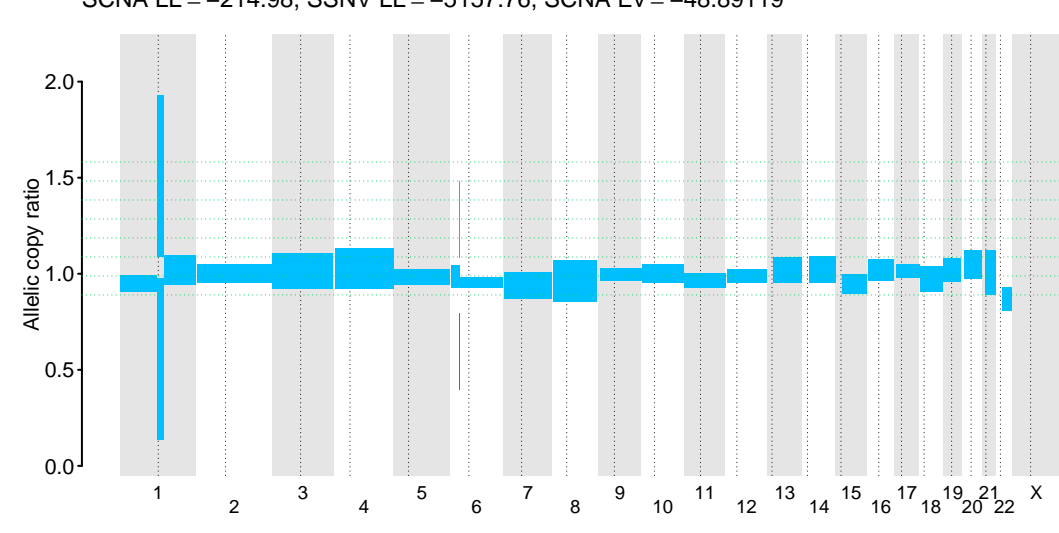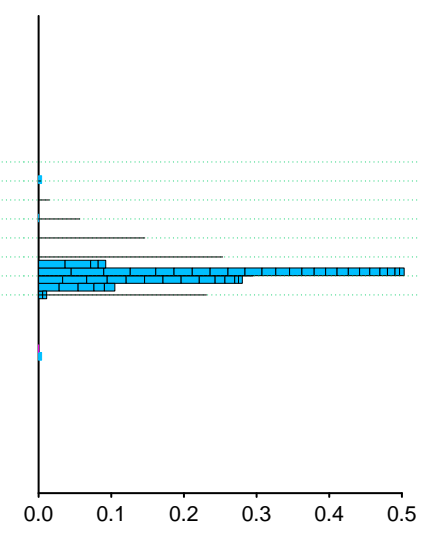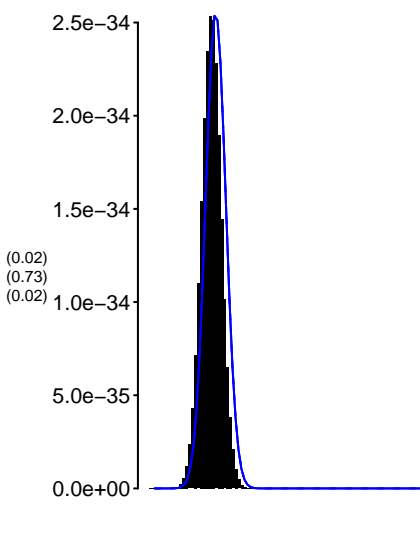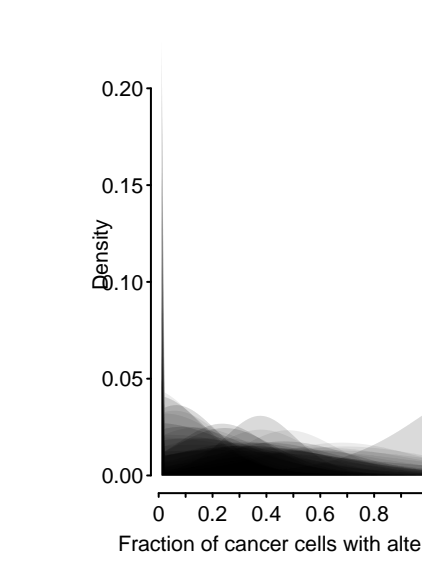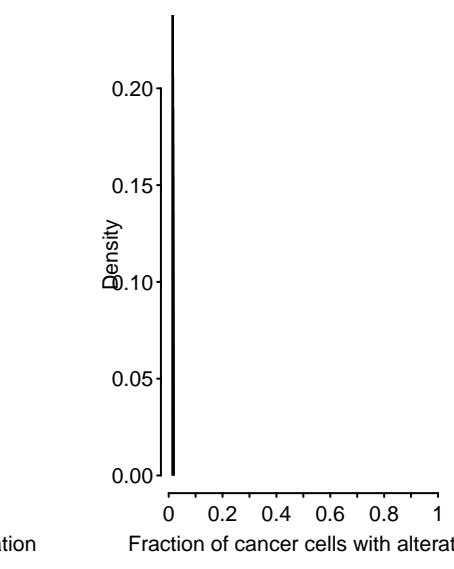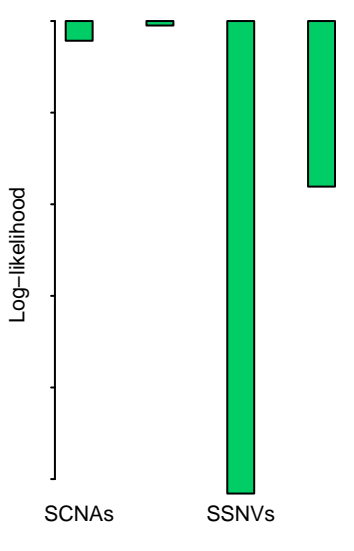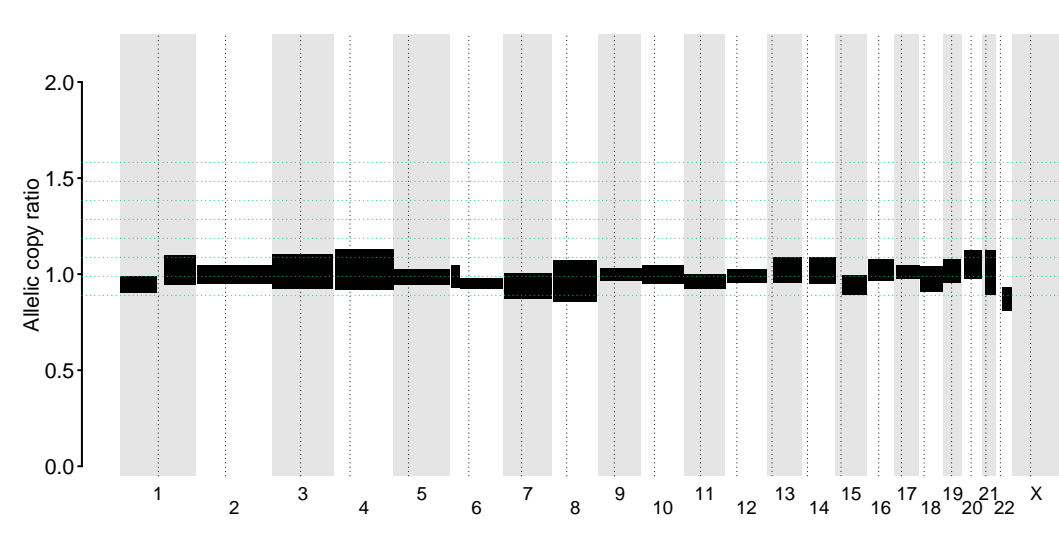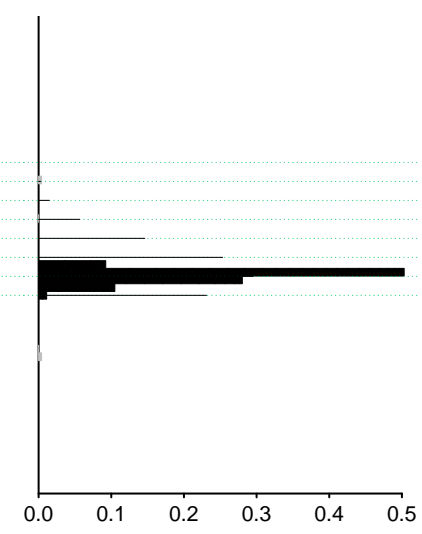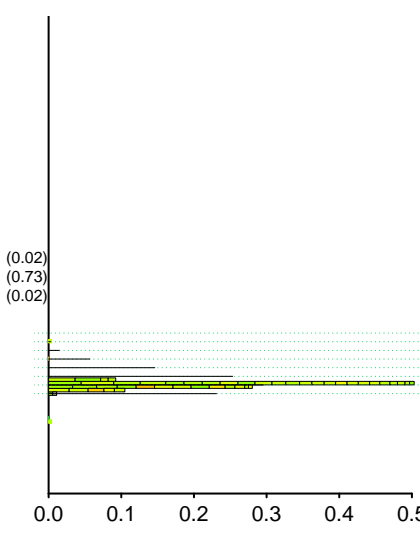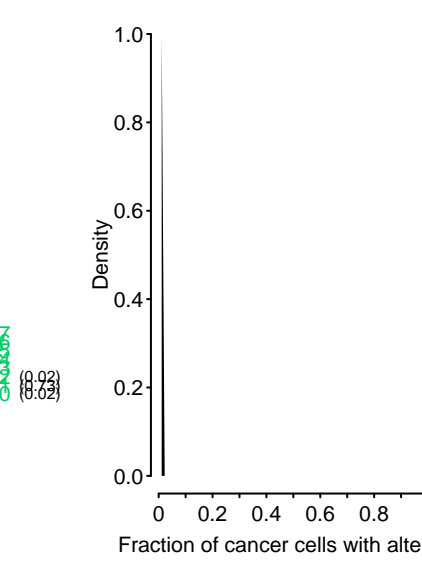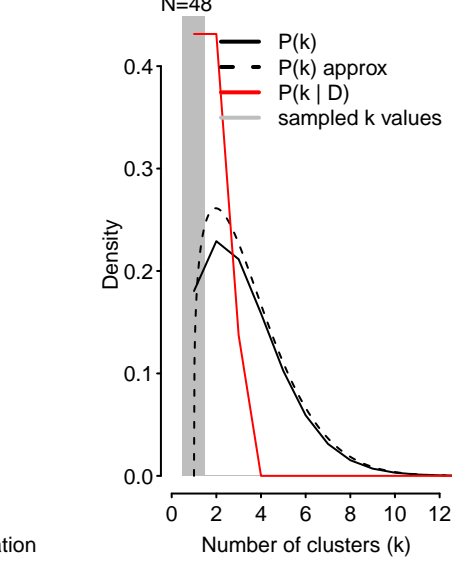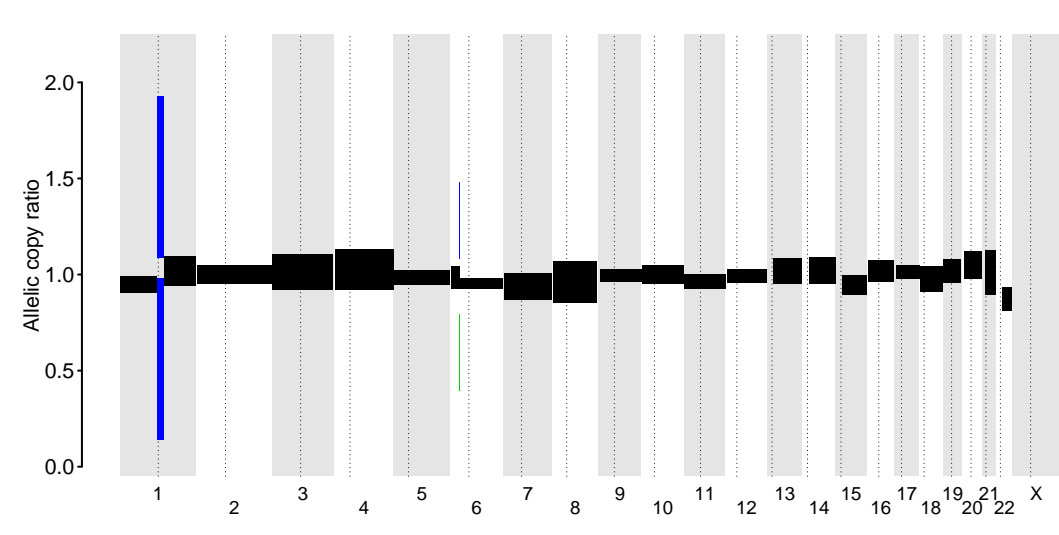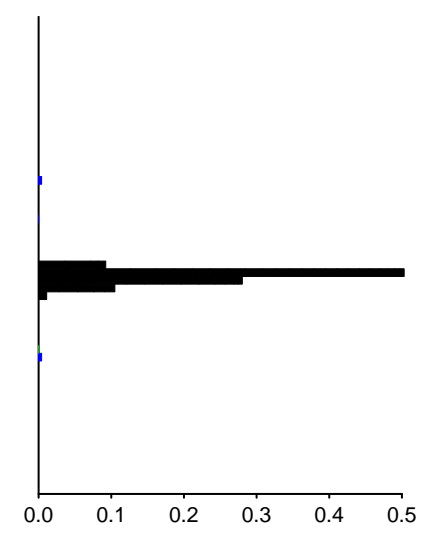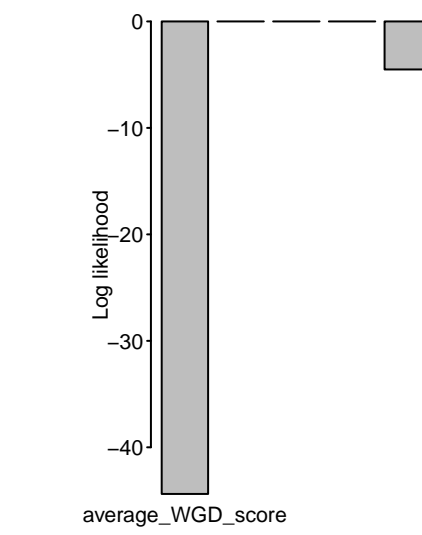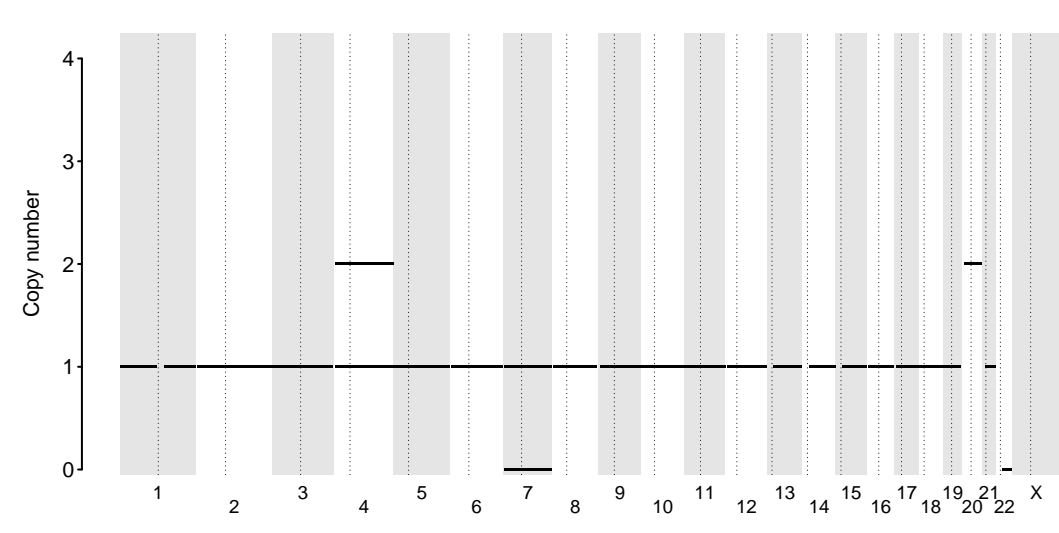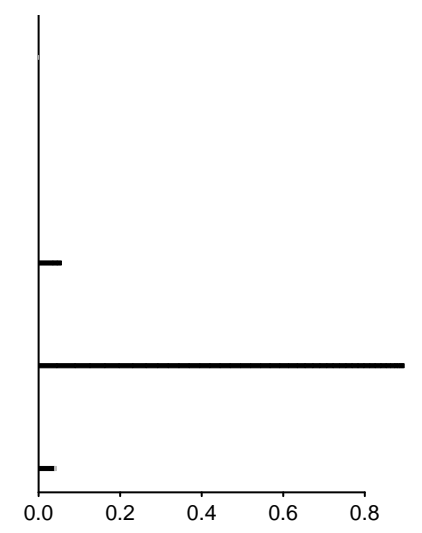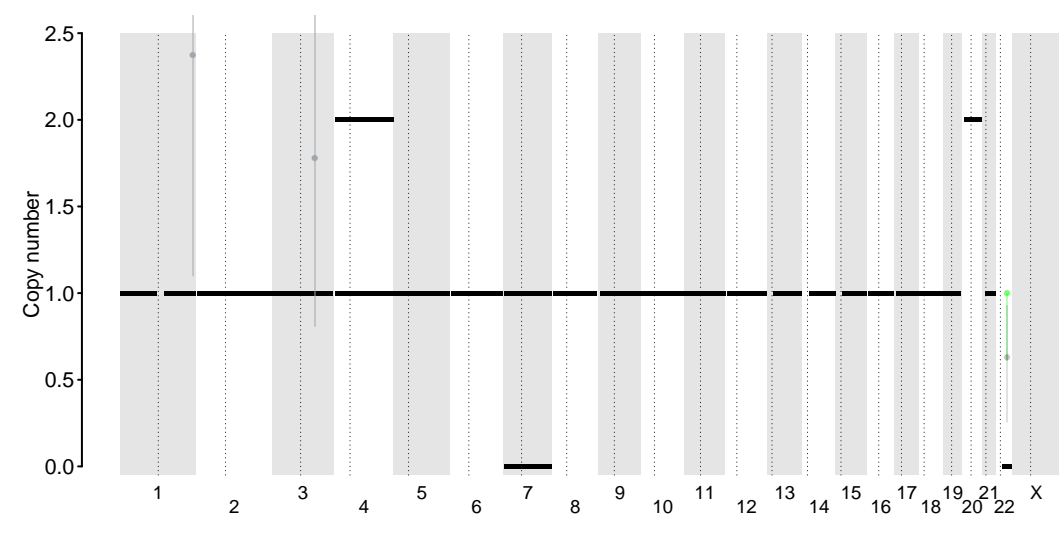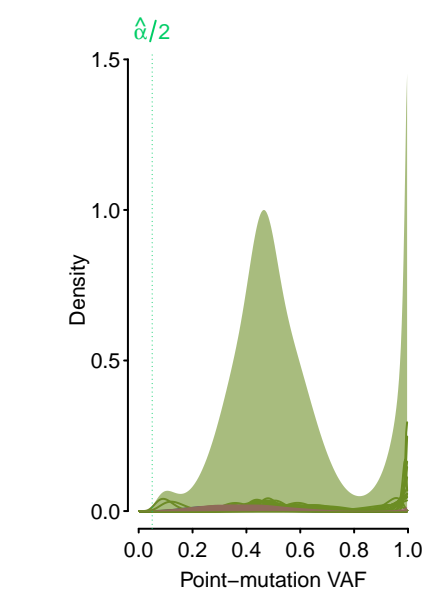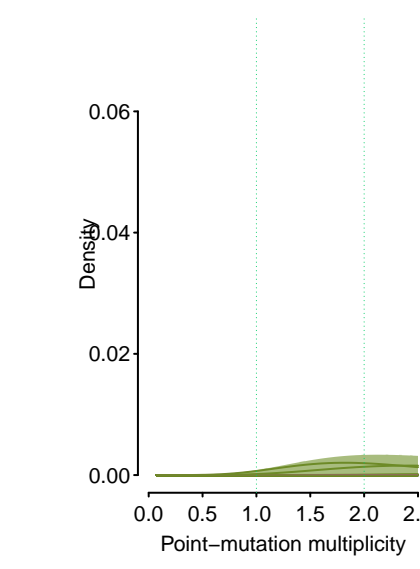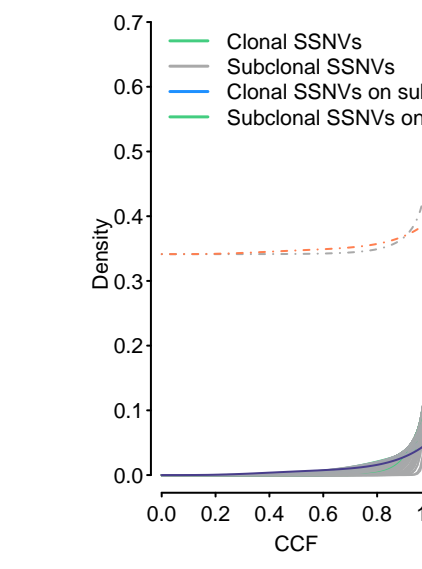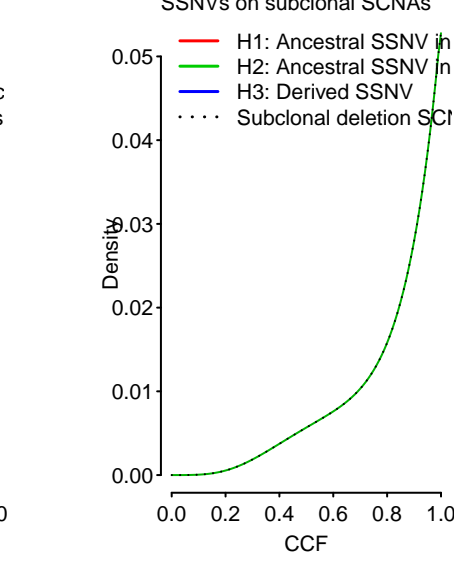

Sample 98

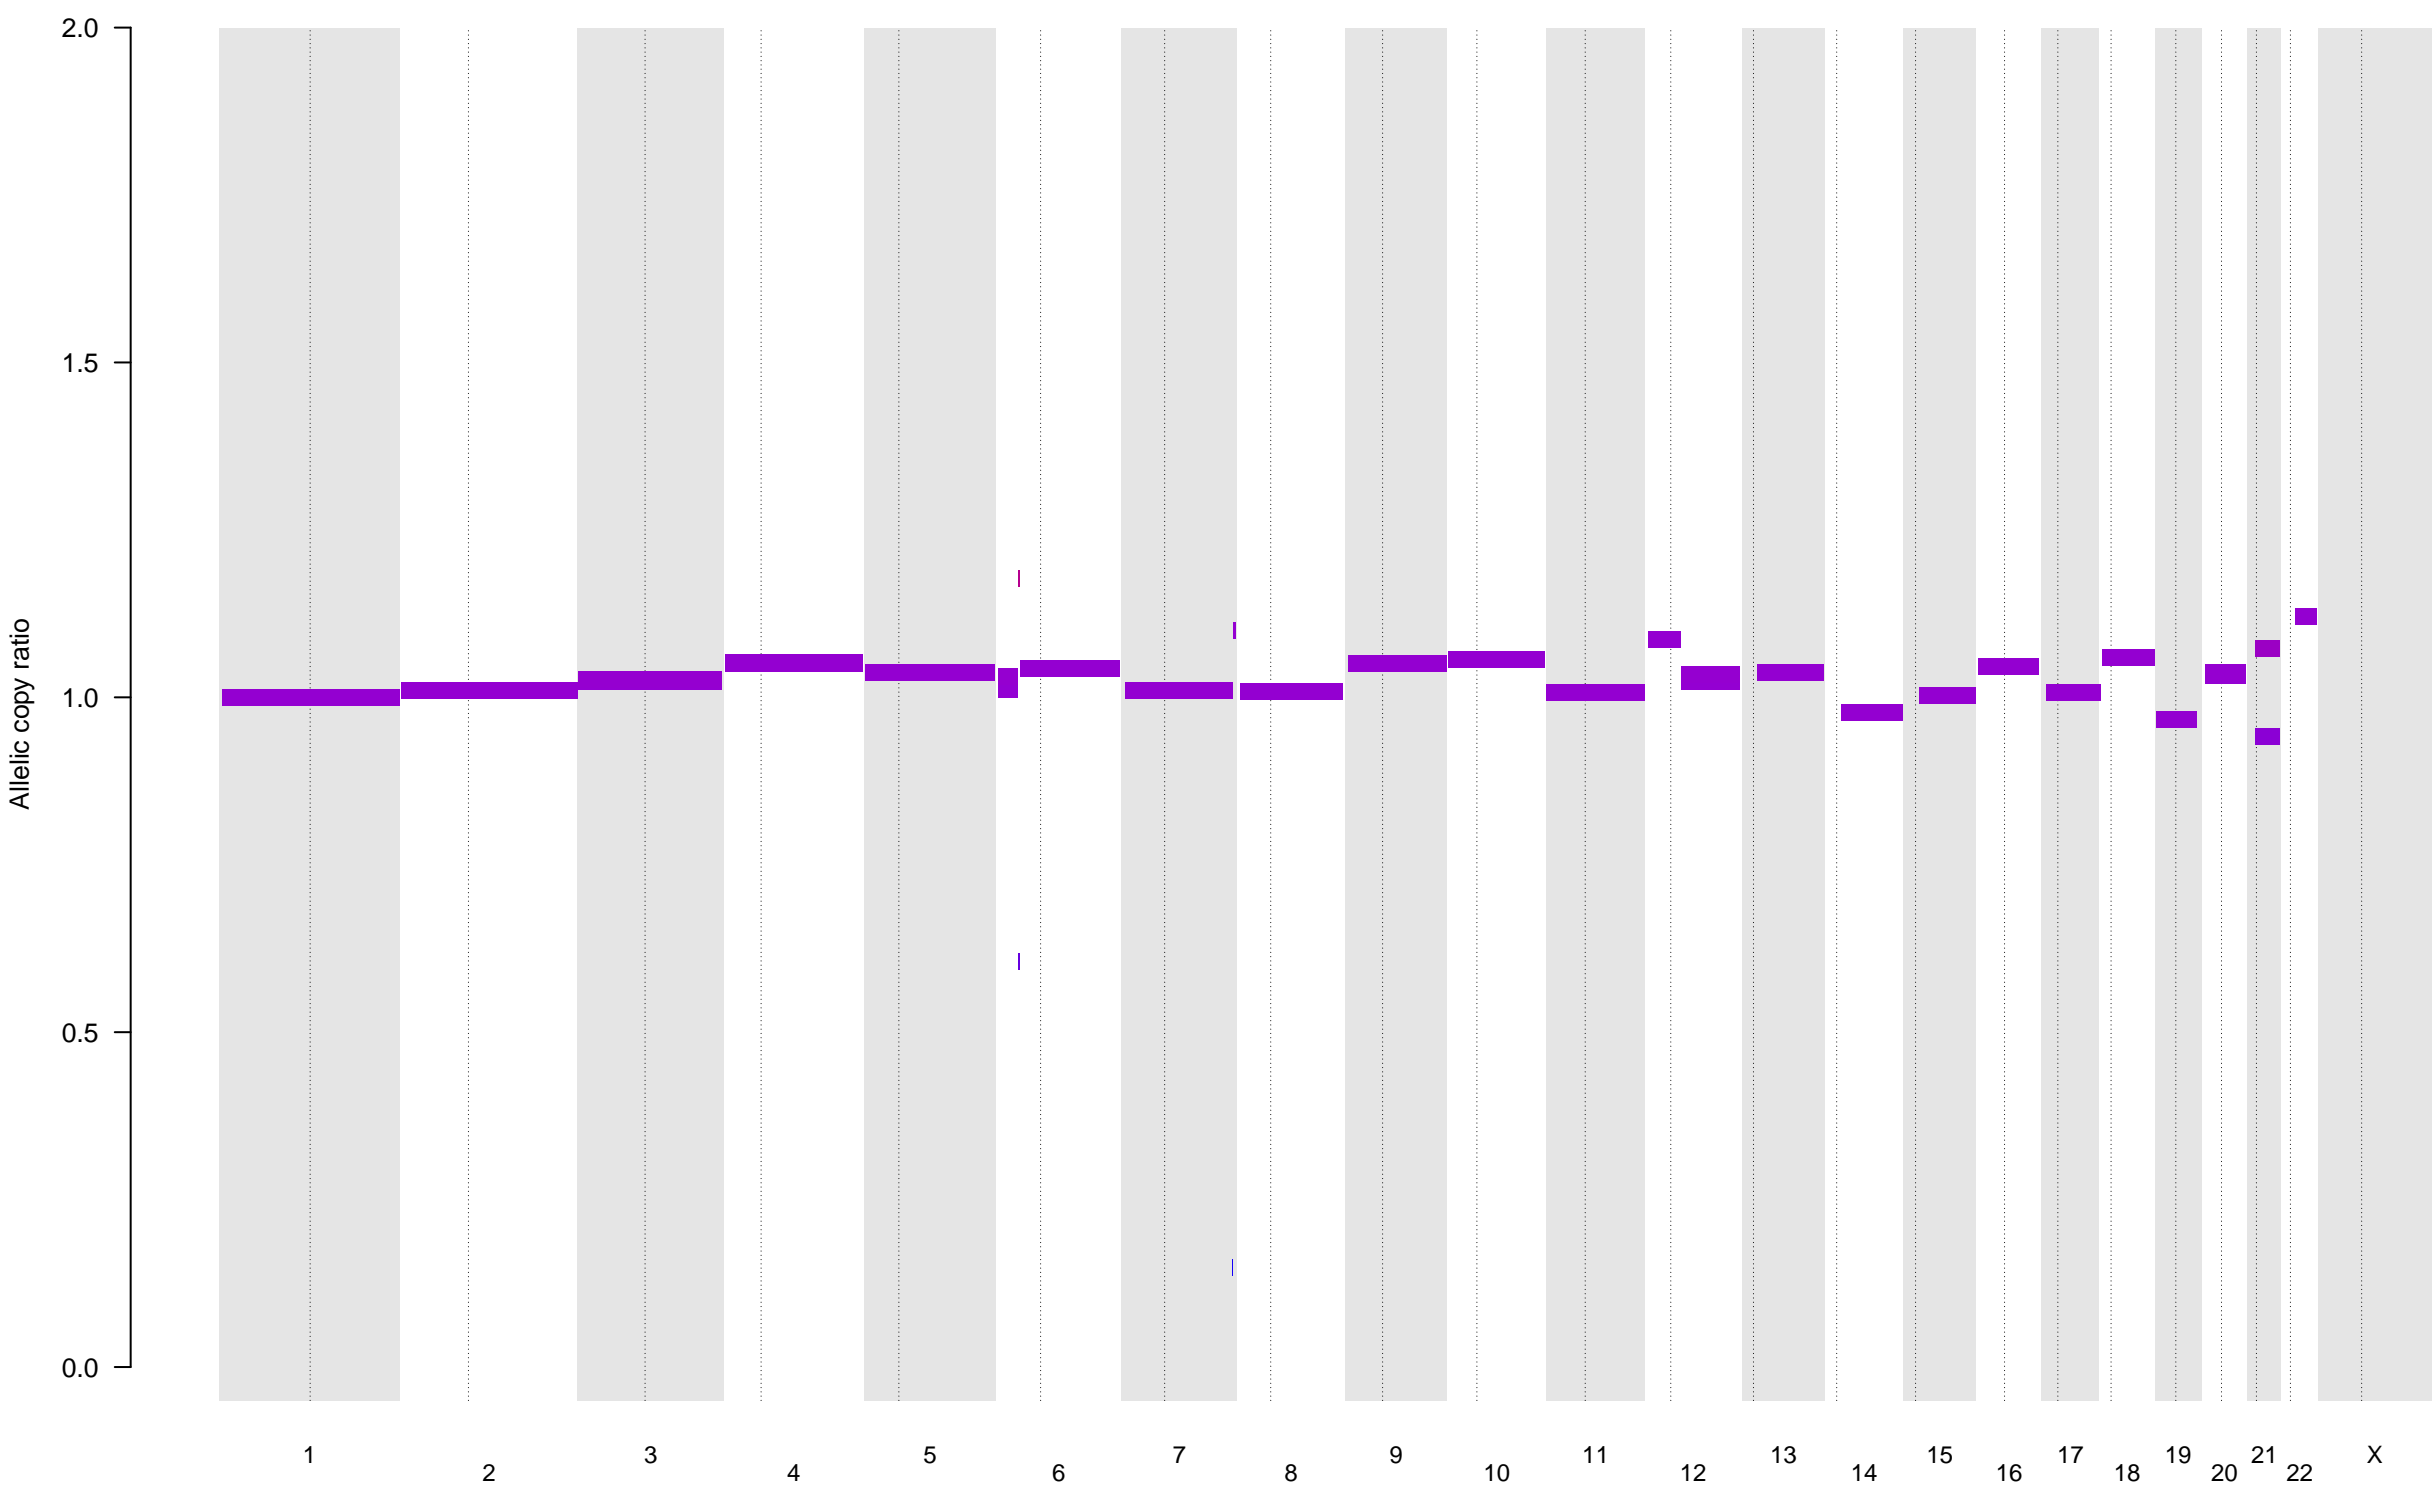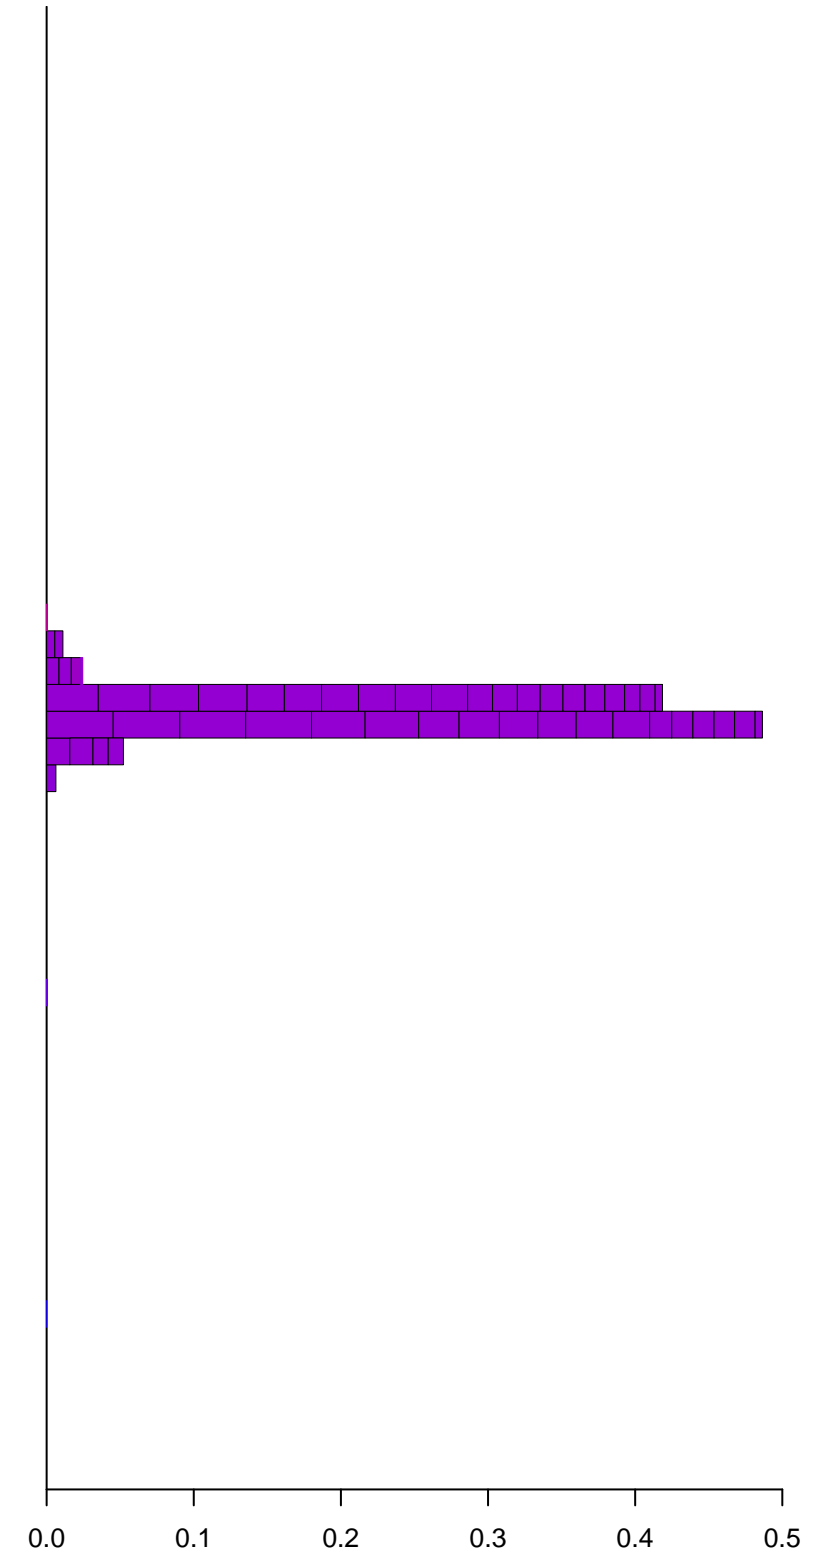

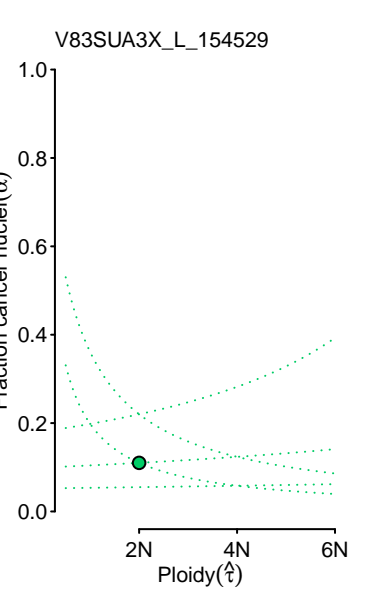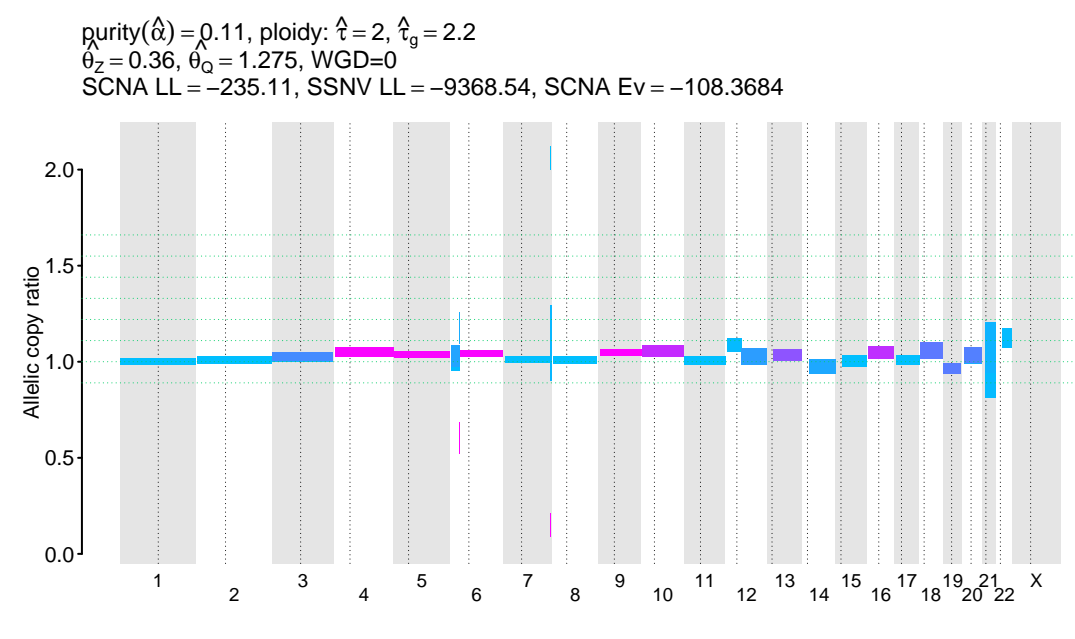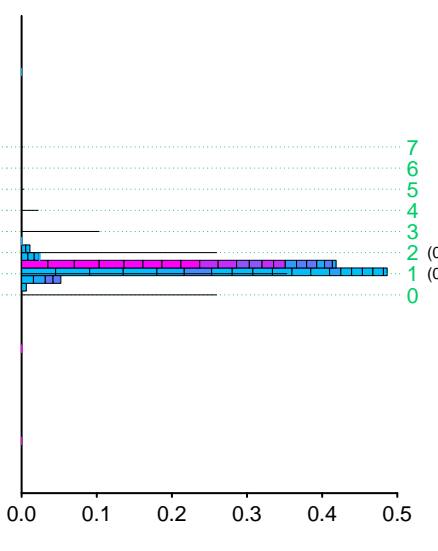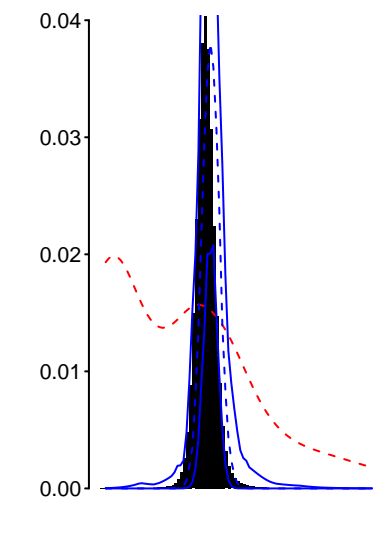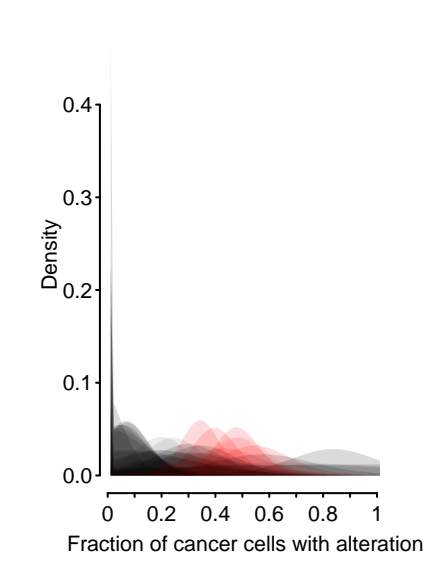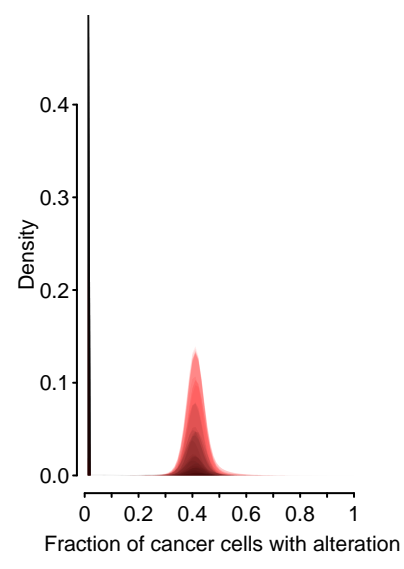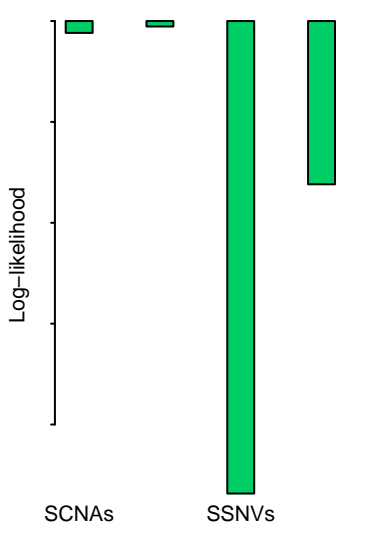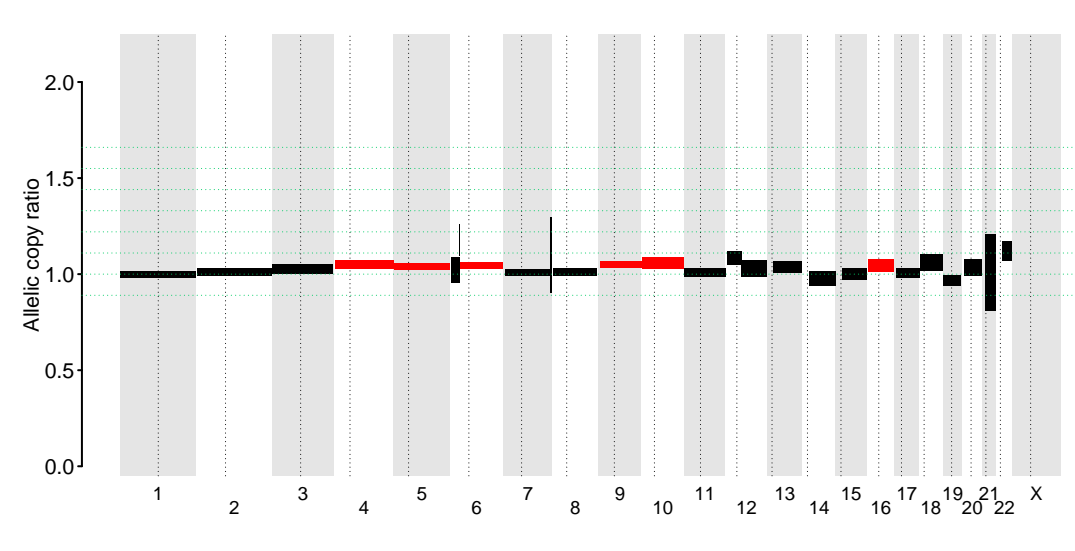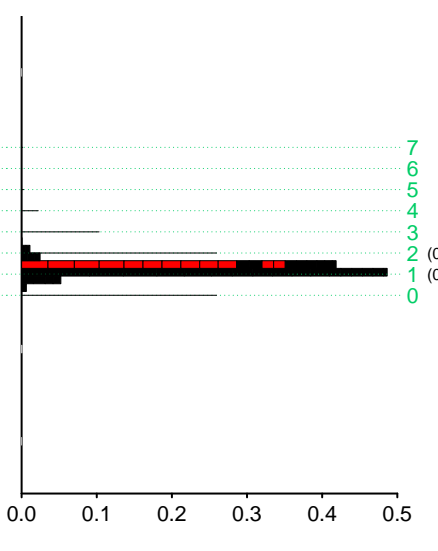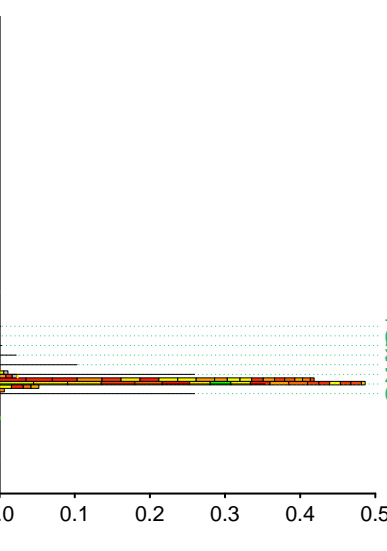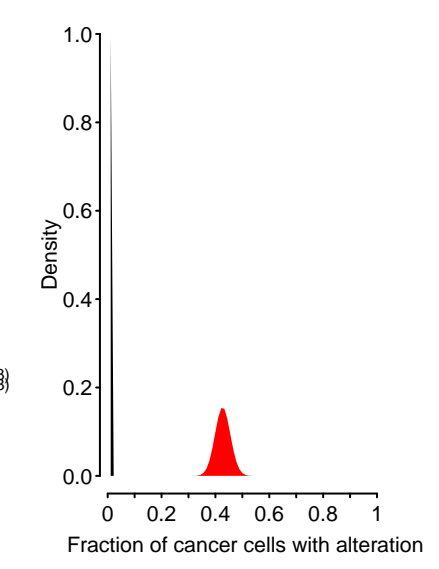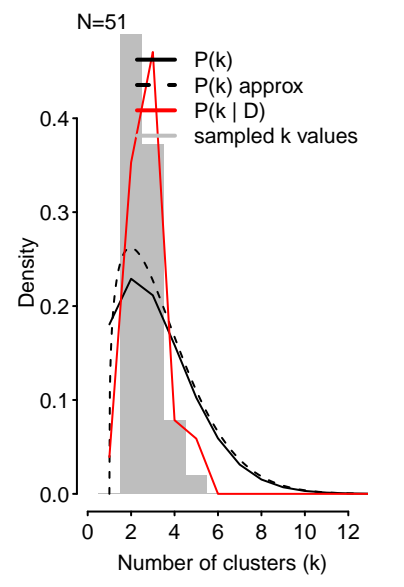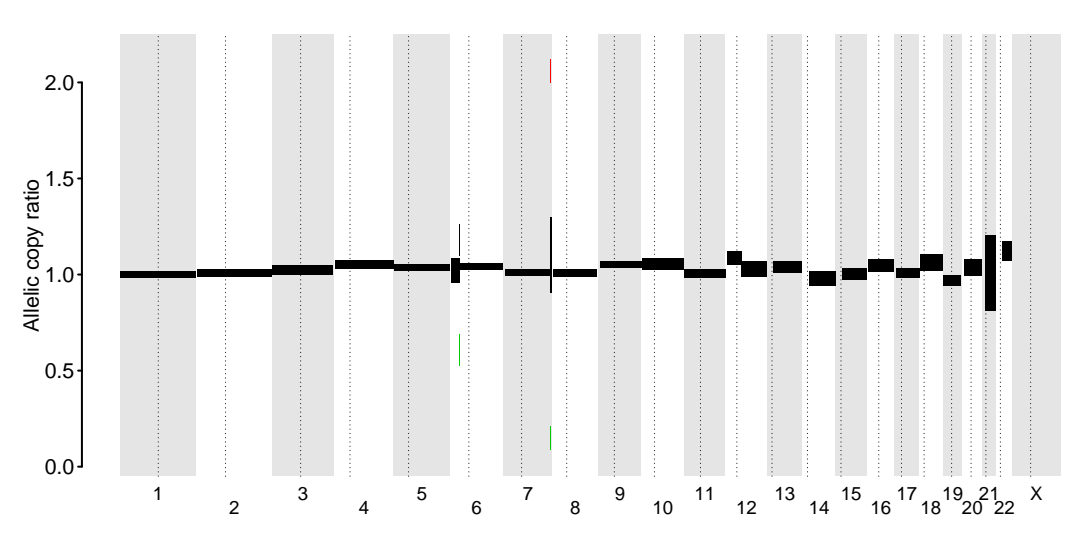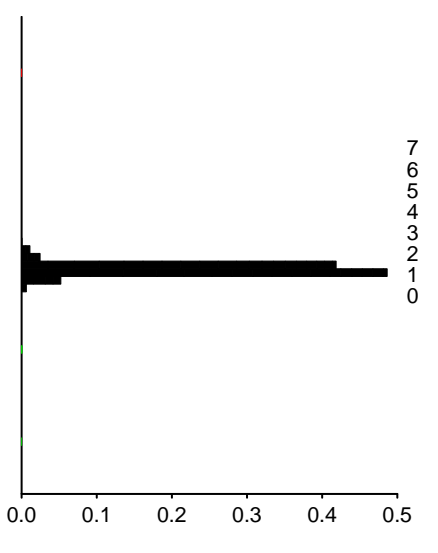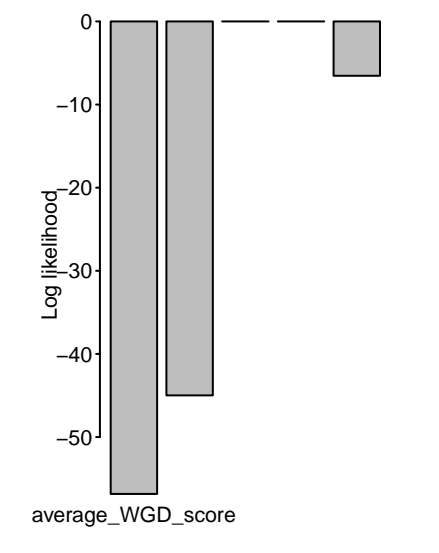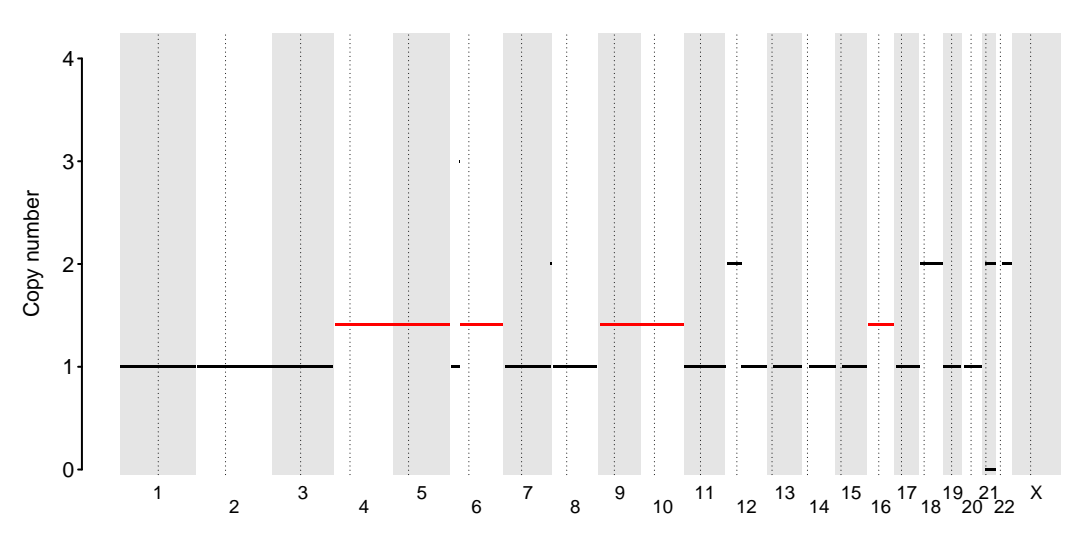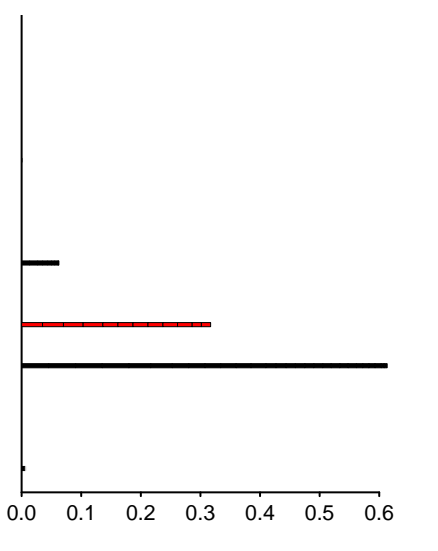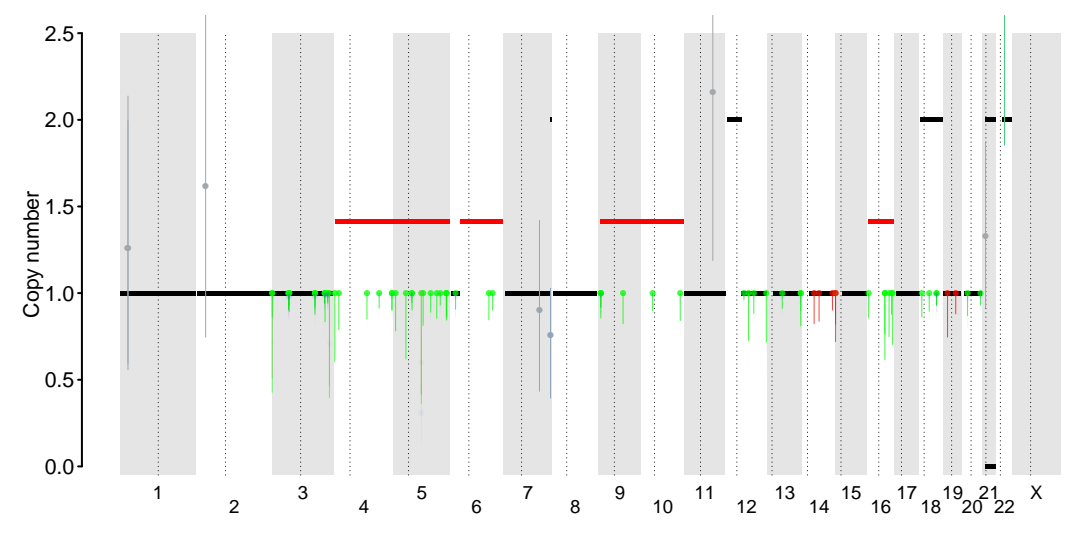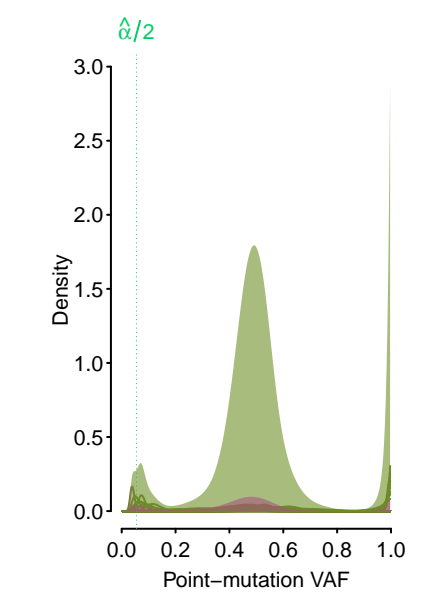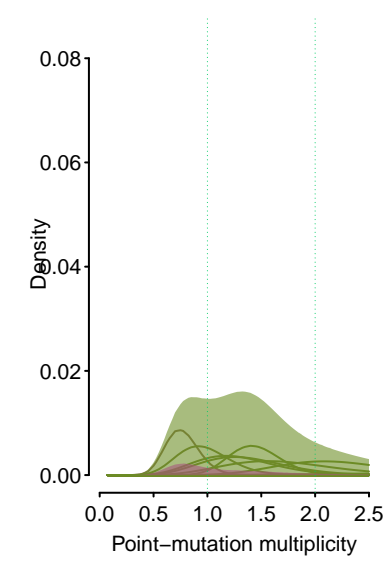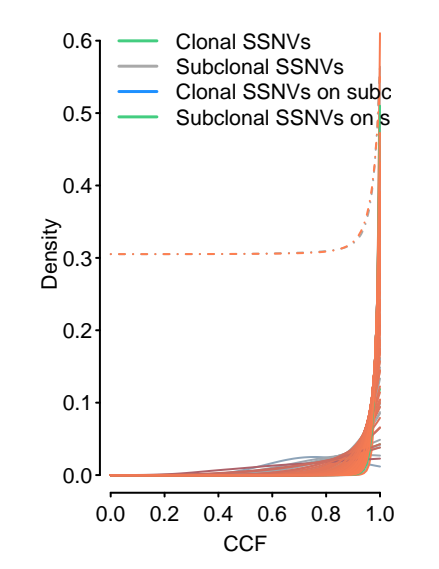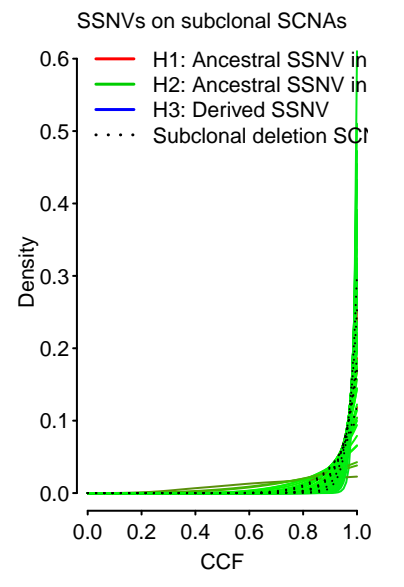

Sample 99

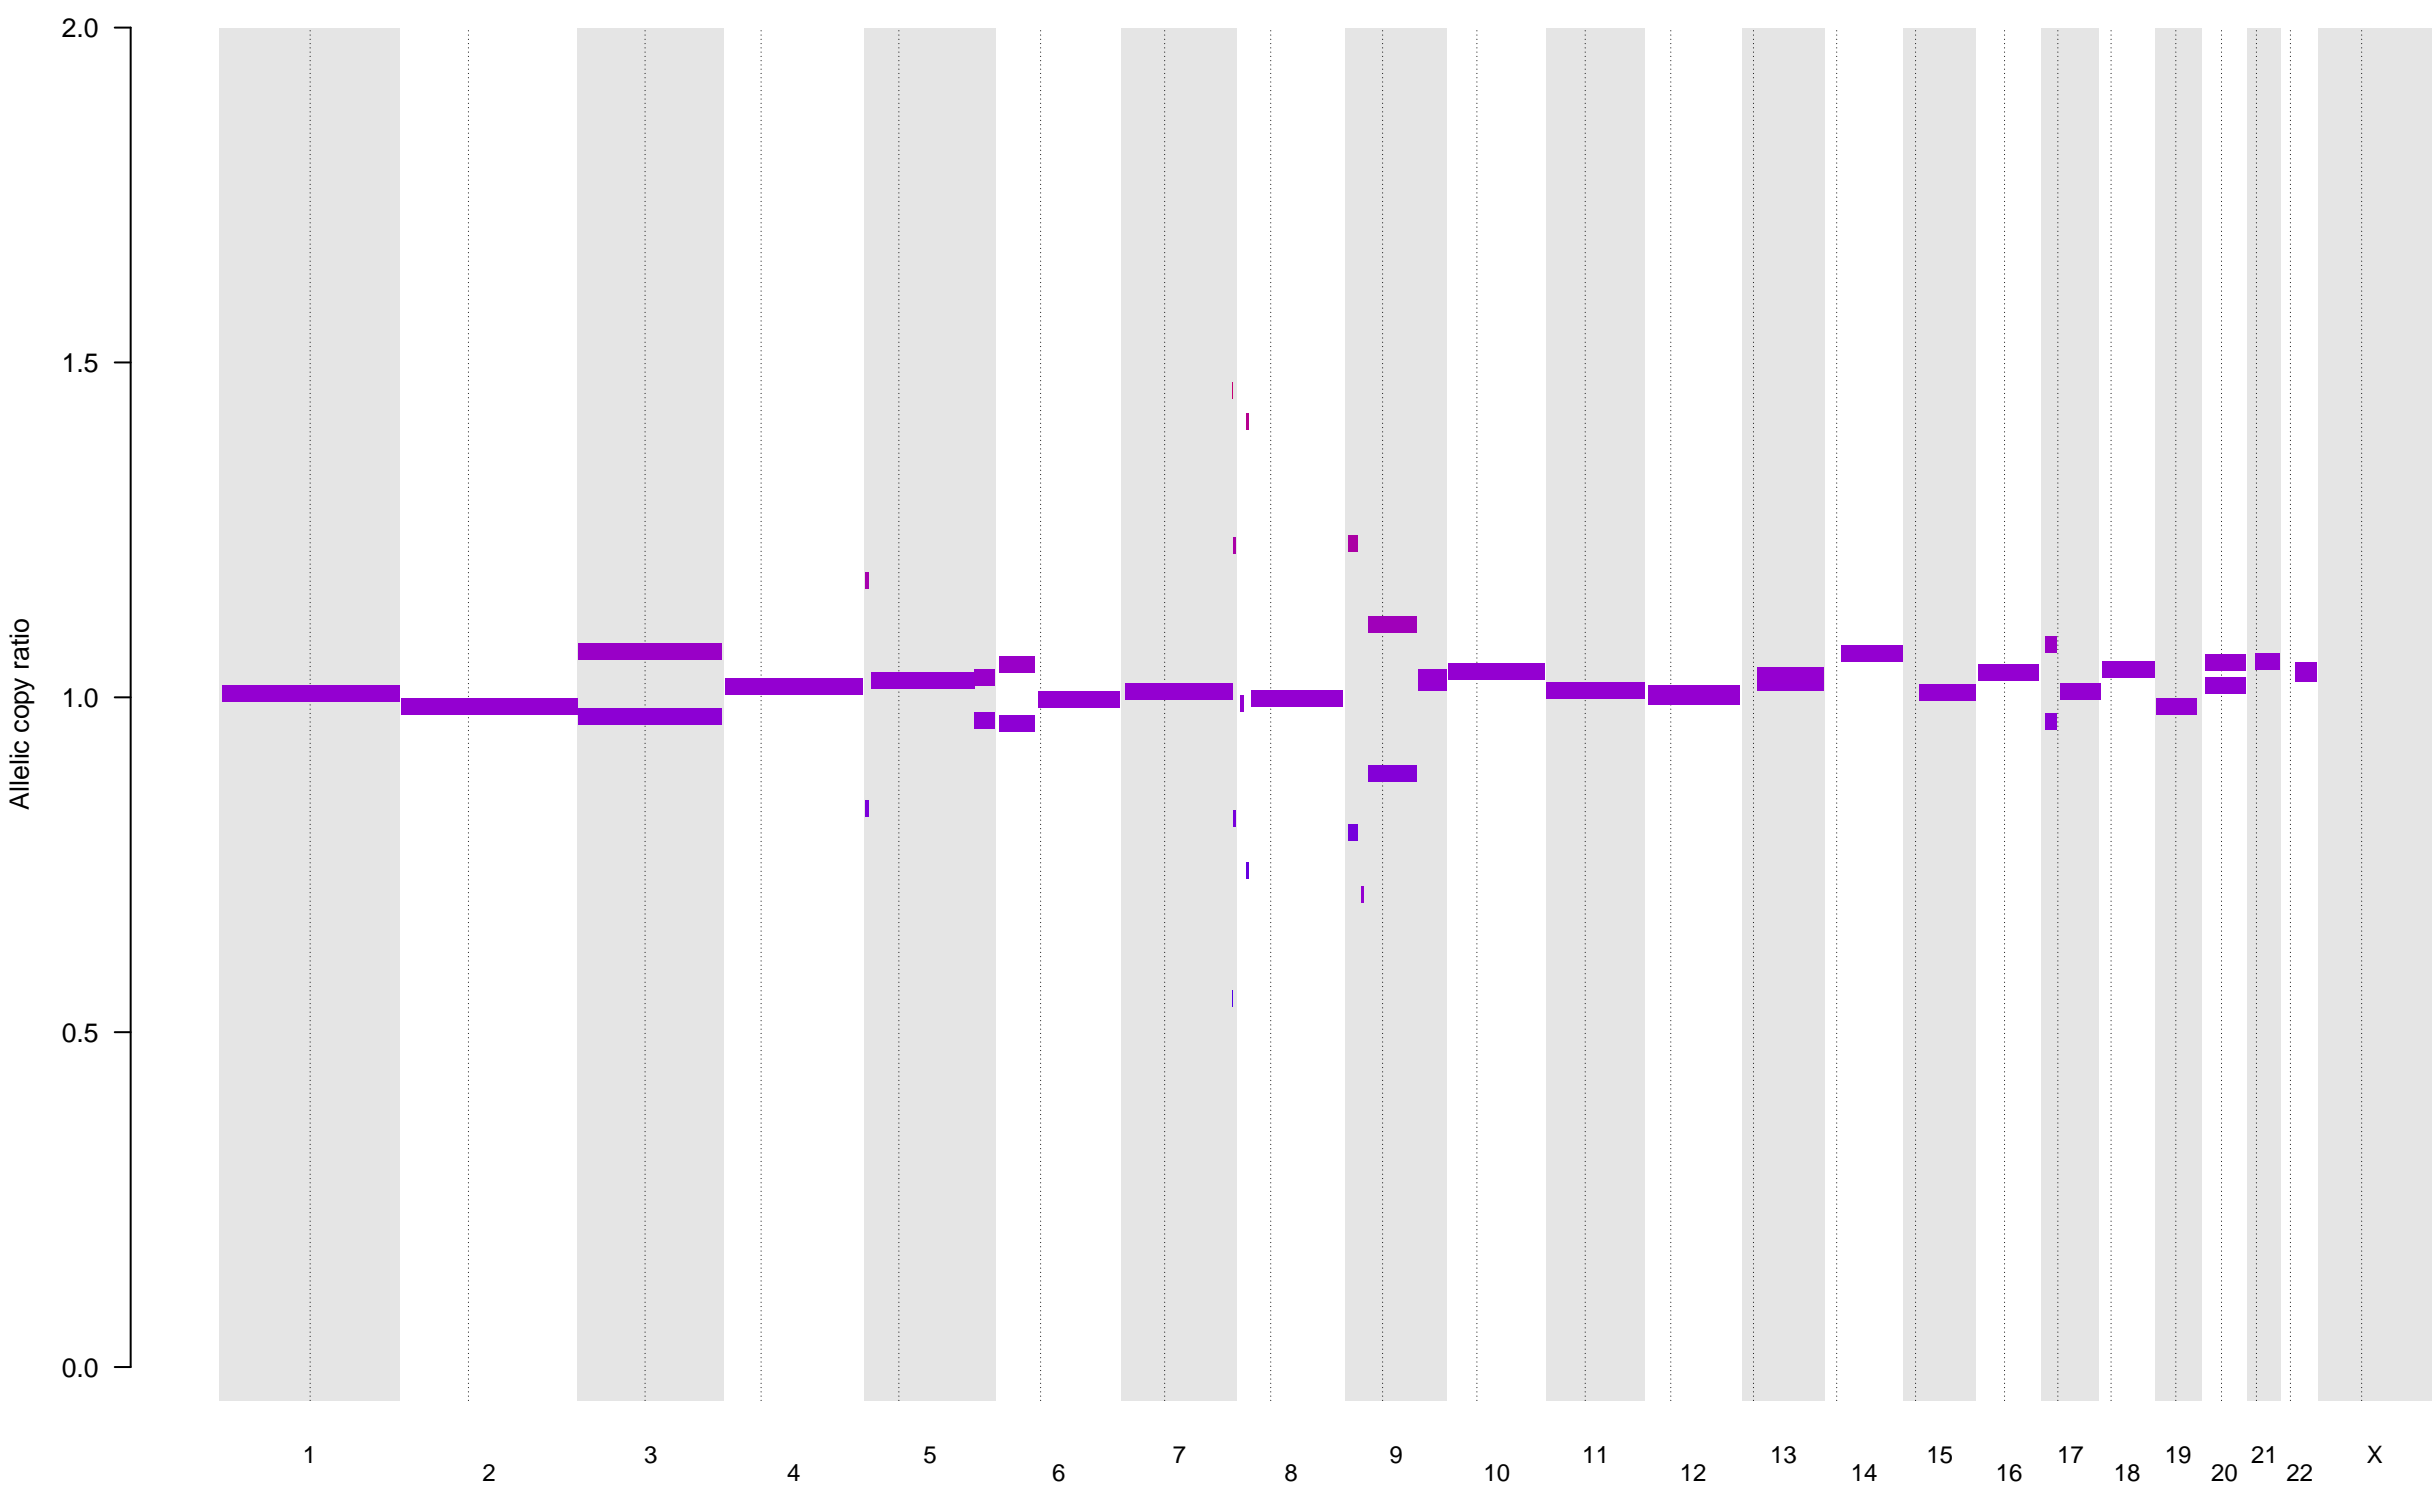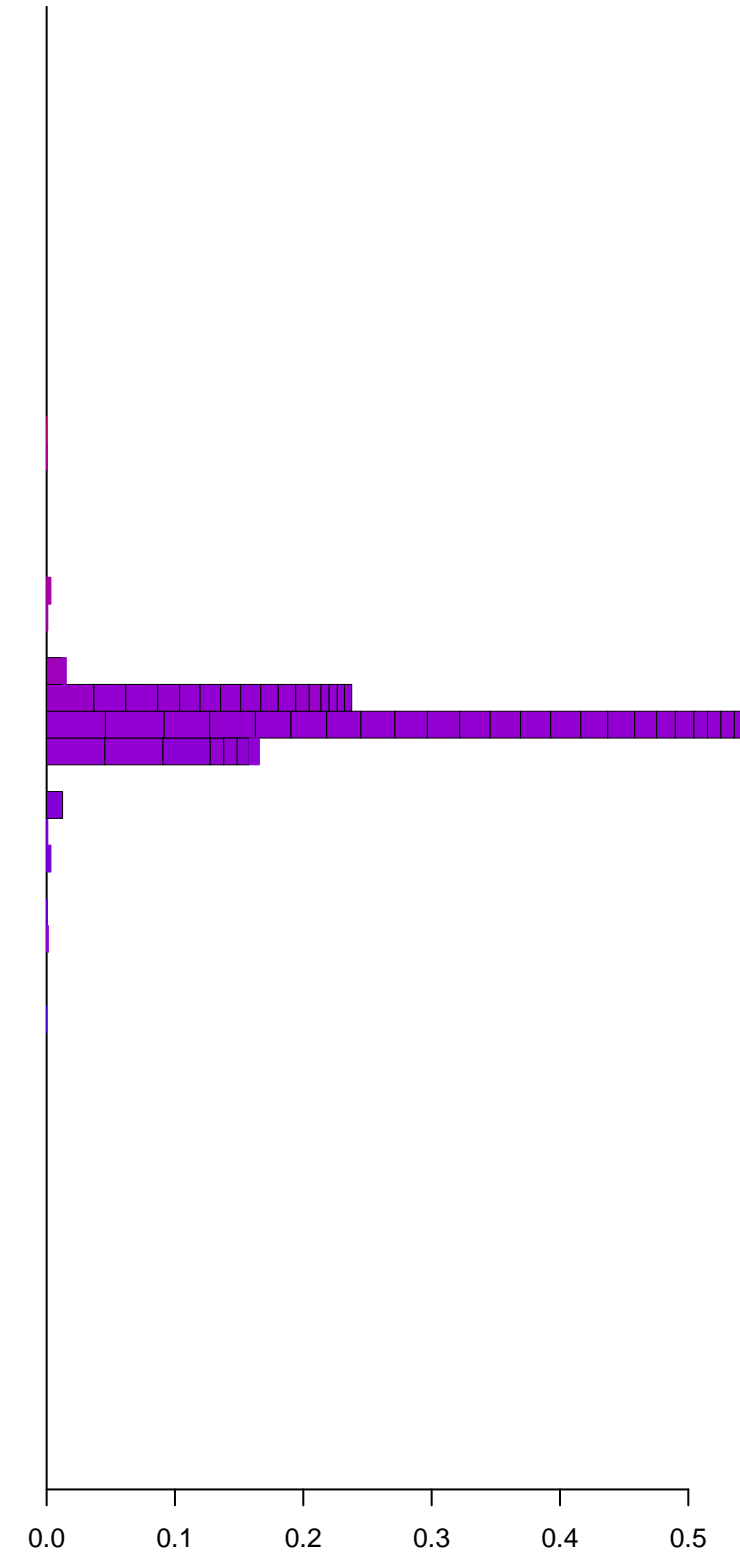

purity( $\hat{\alpha}$ ) = 0.19, ploidy:  $\hat{\tau} = 1.91$ ,  $\hat{\tau}_g = 1.99$   
 $\theta_z = 0$ ,  $\theta_0 = 1.383$ , WGD=0  
 SCNA LL = -225.96, SSNV LL = -6383.29, SCNA Ev = -37.36297

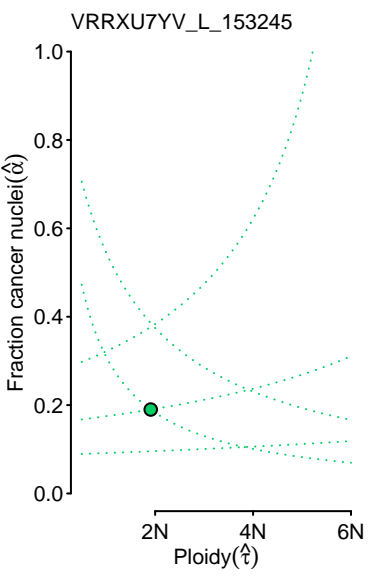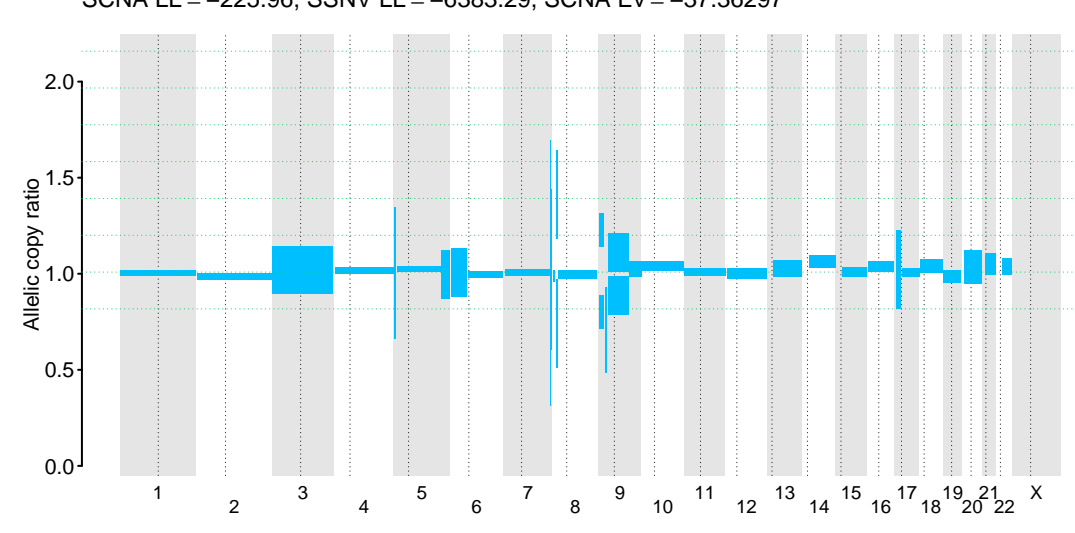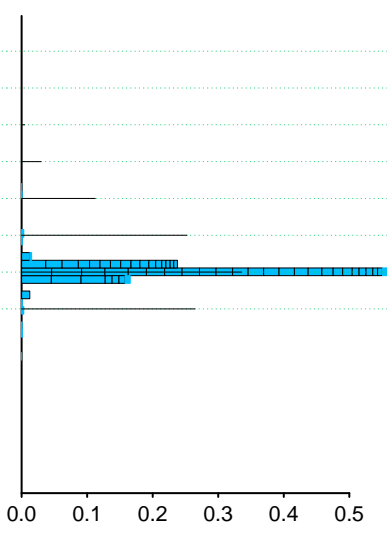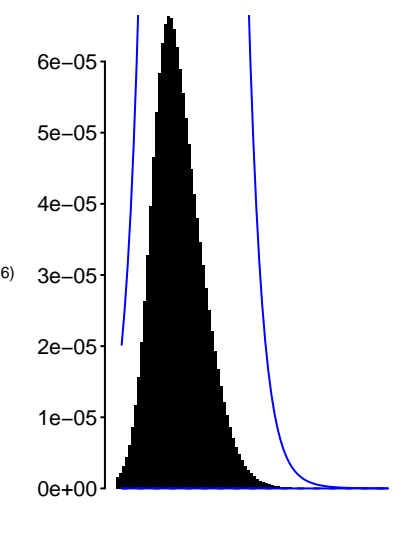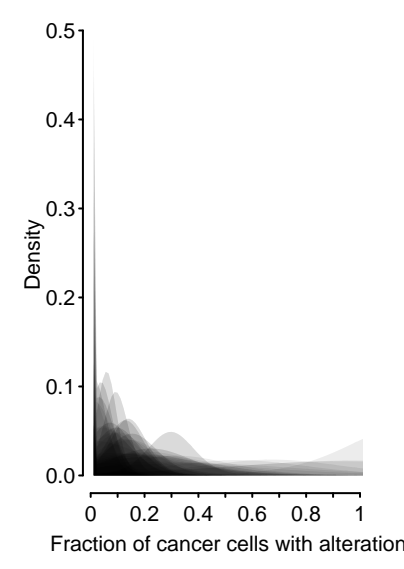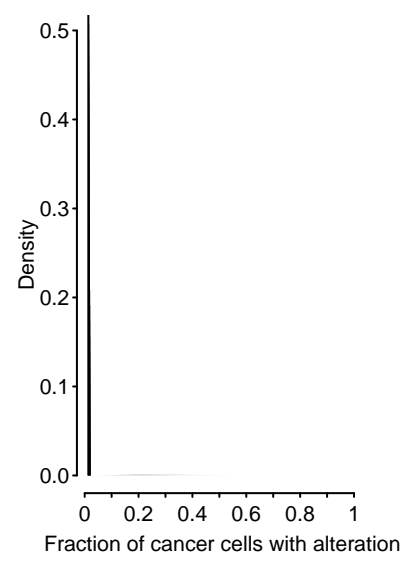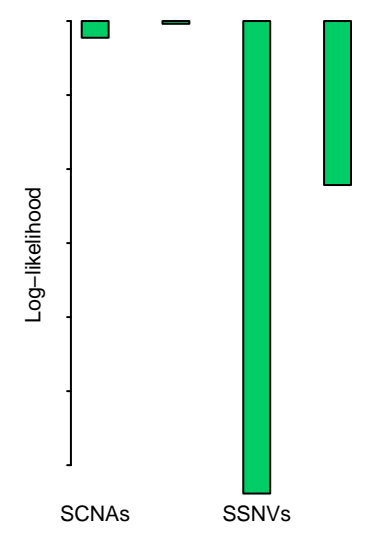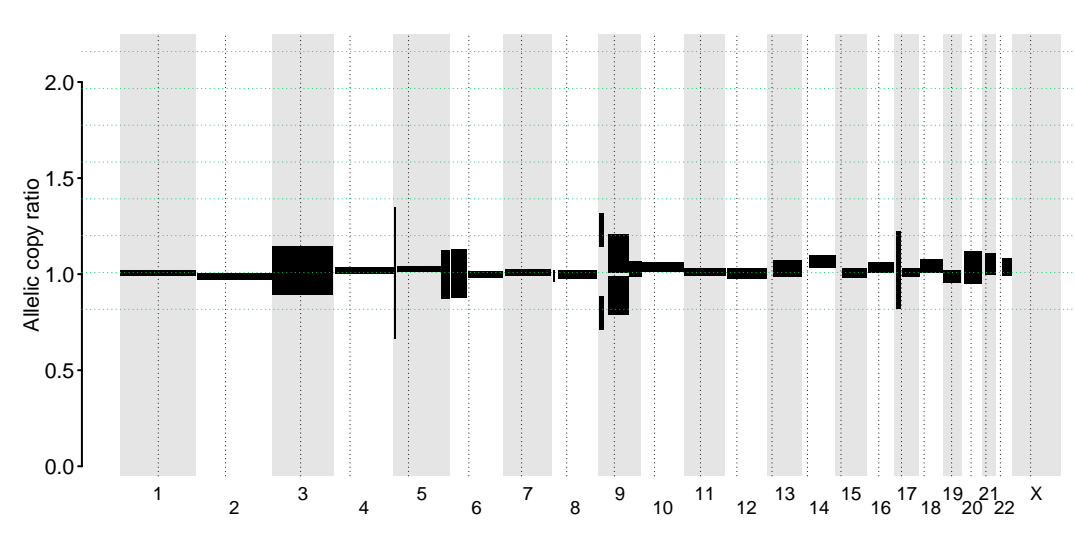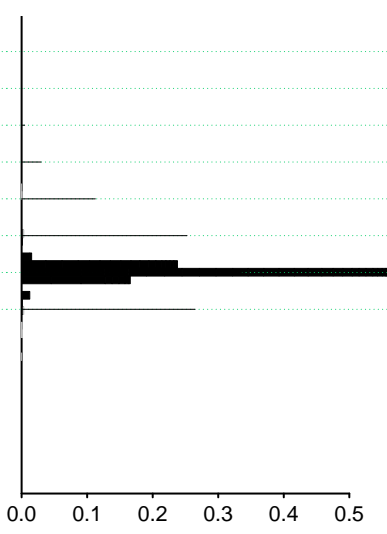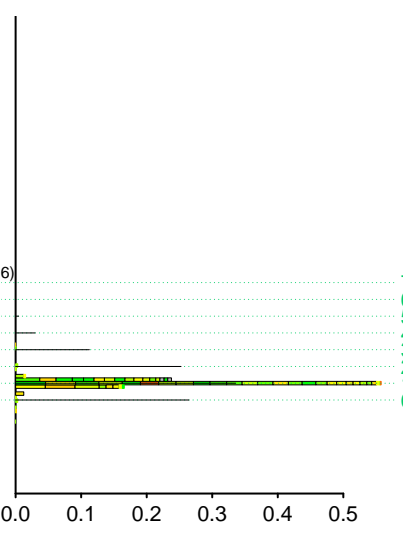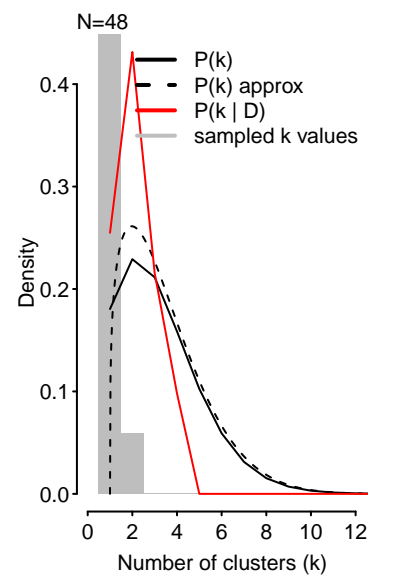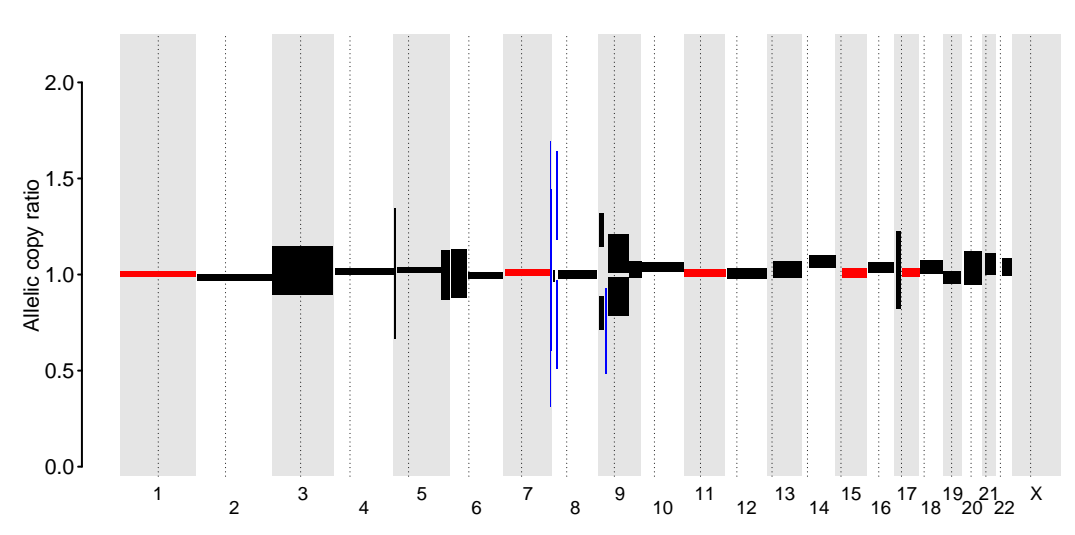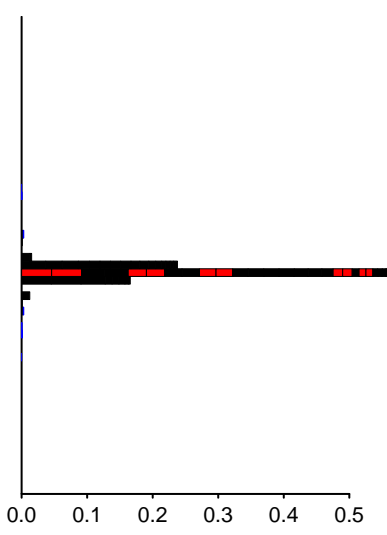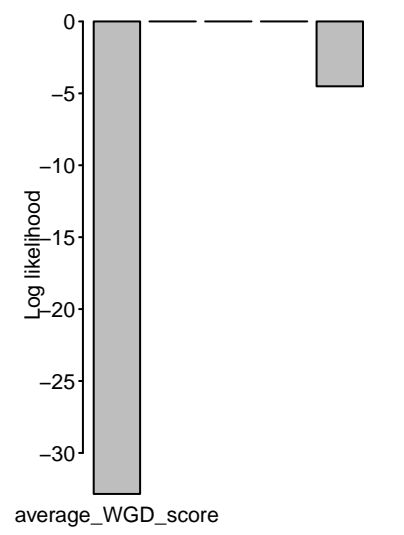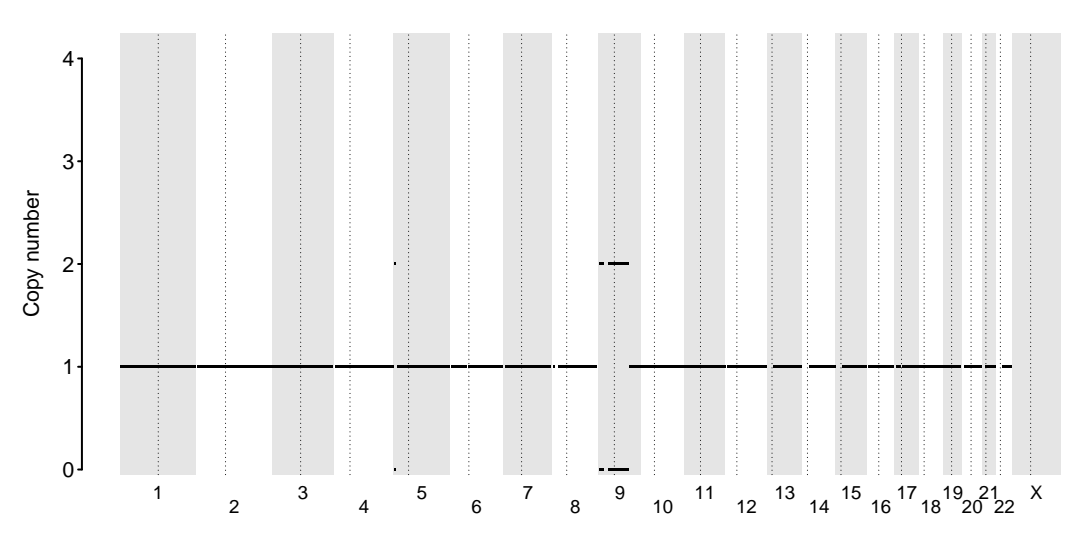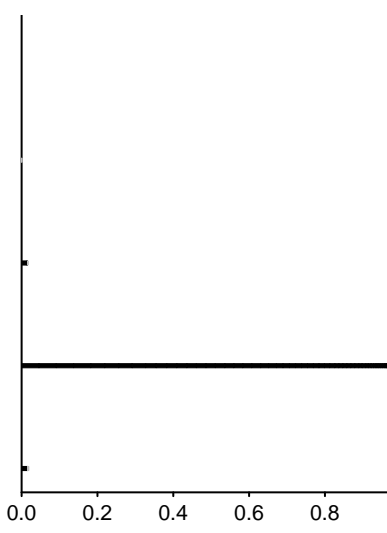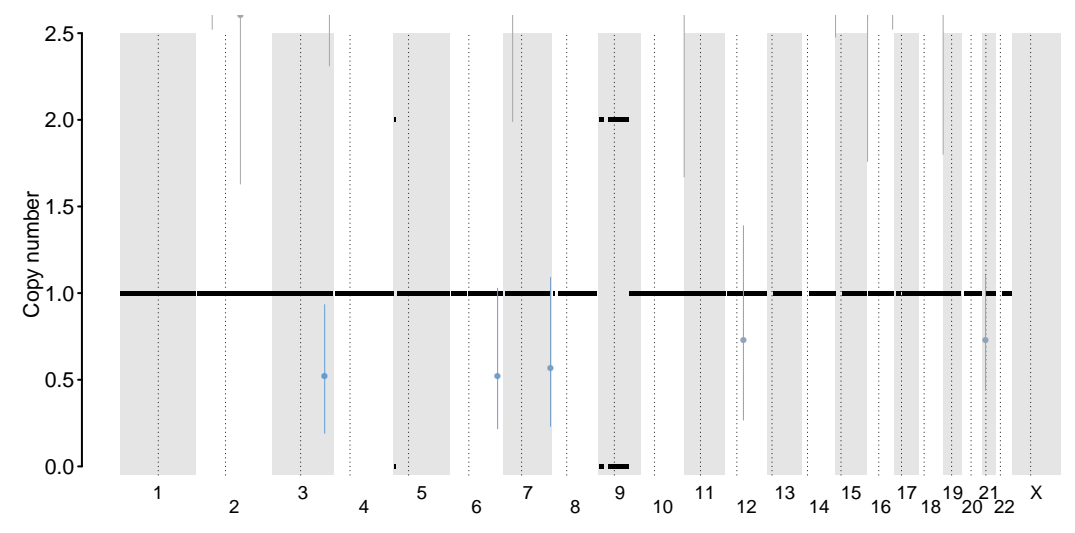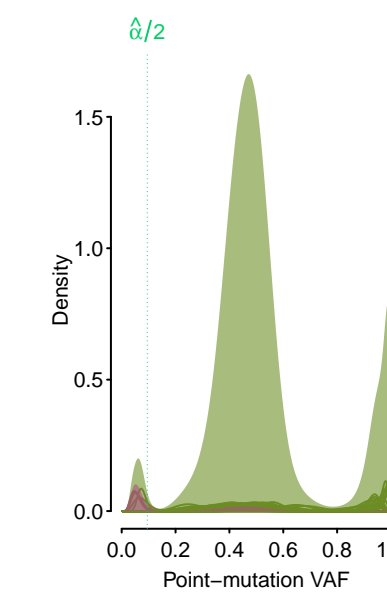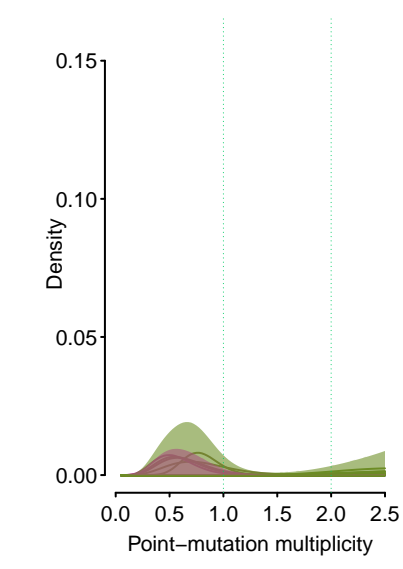



Sample 102

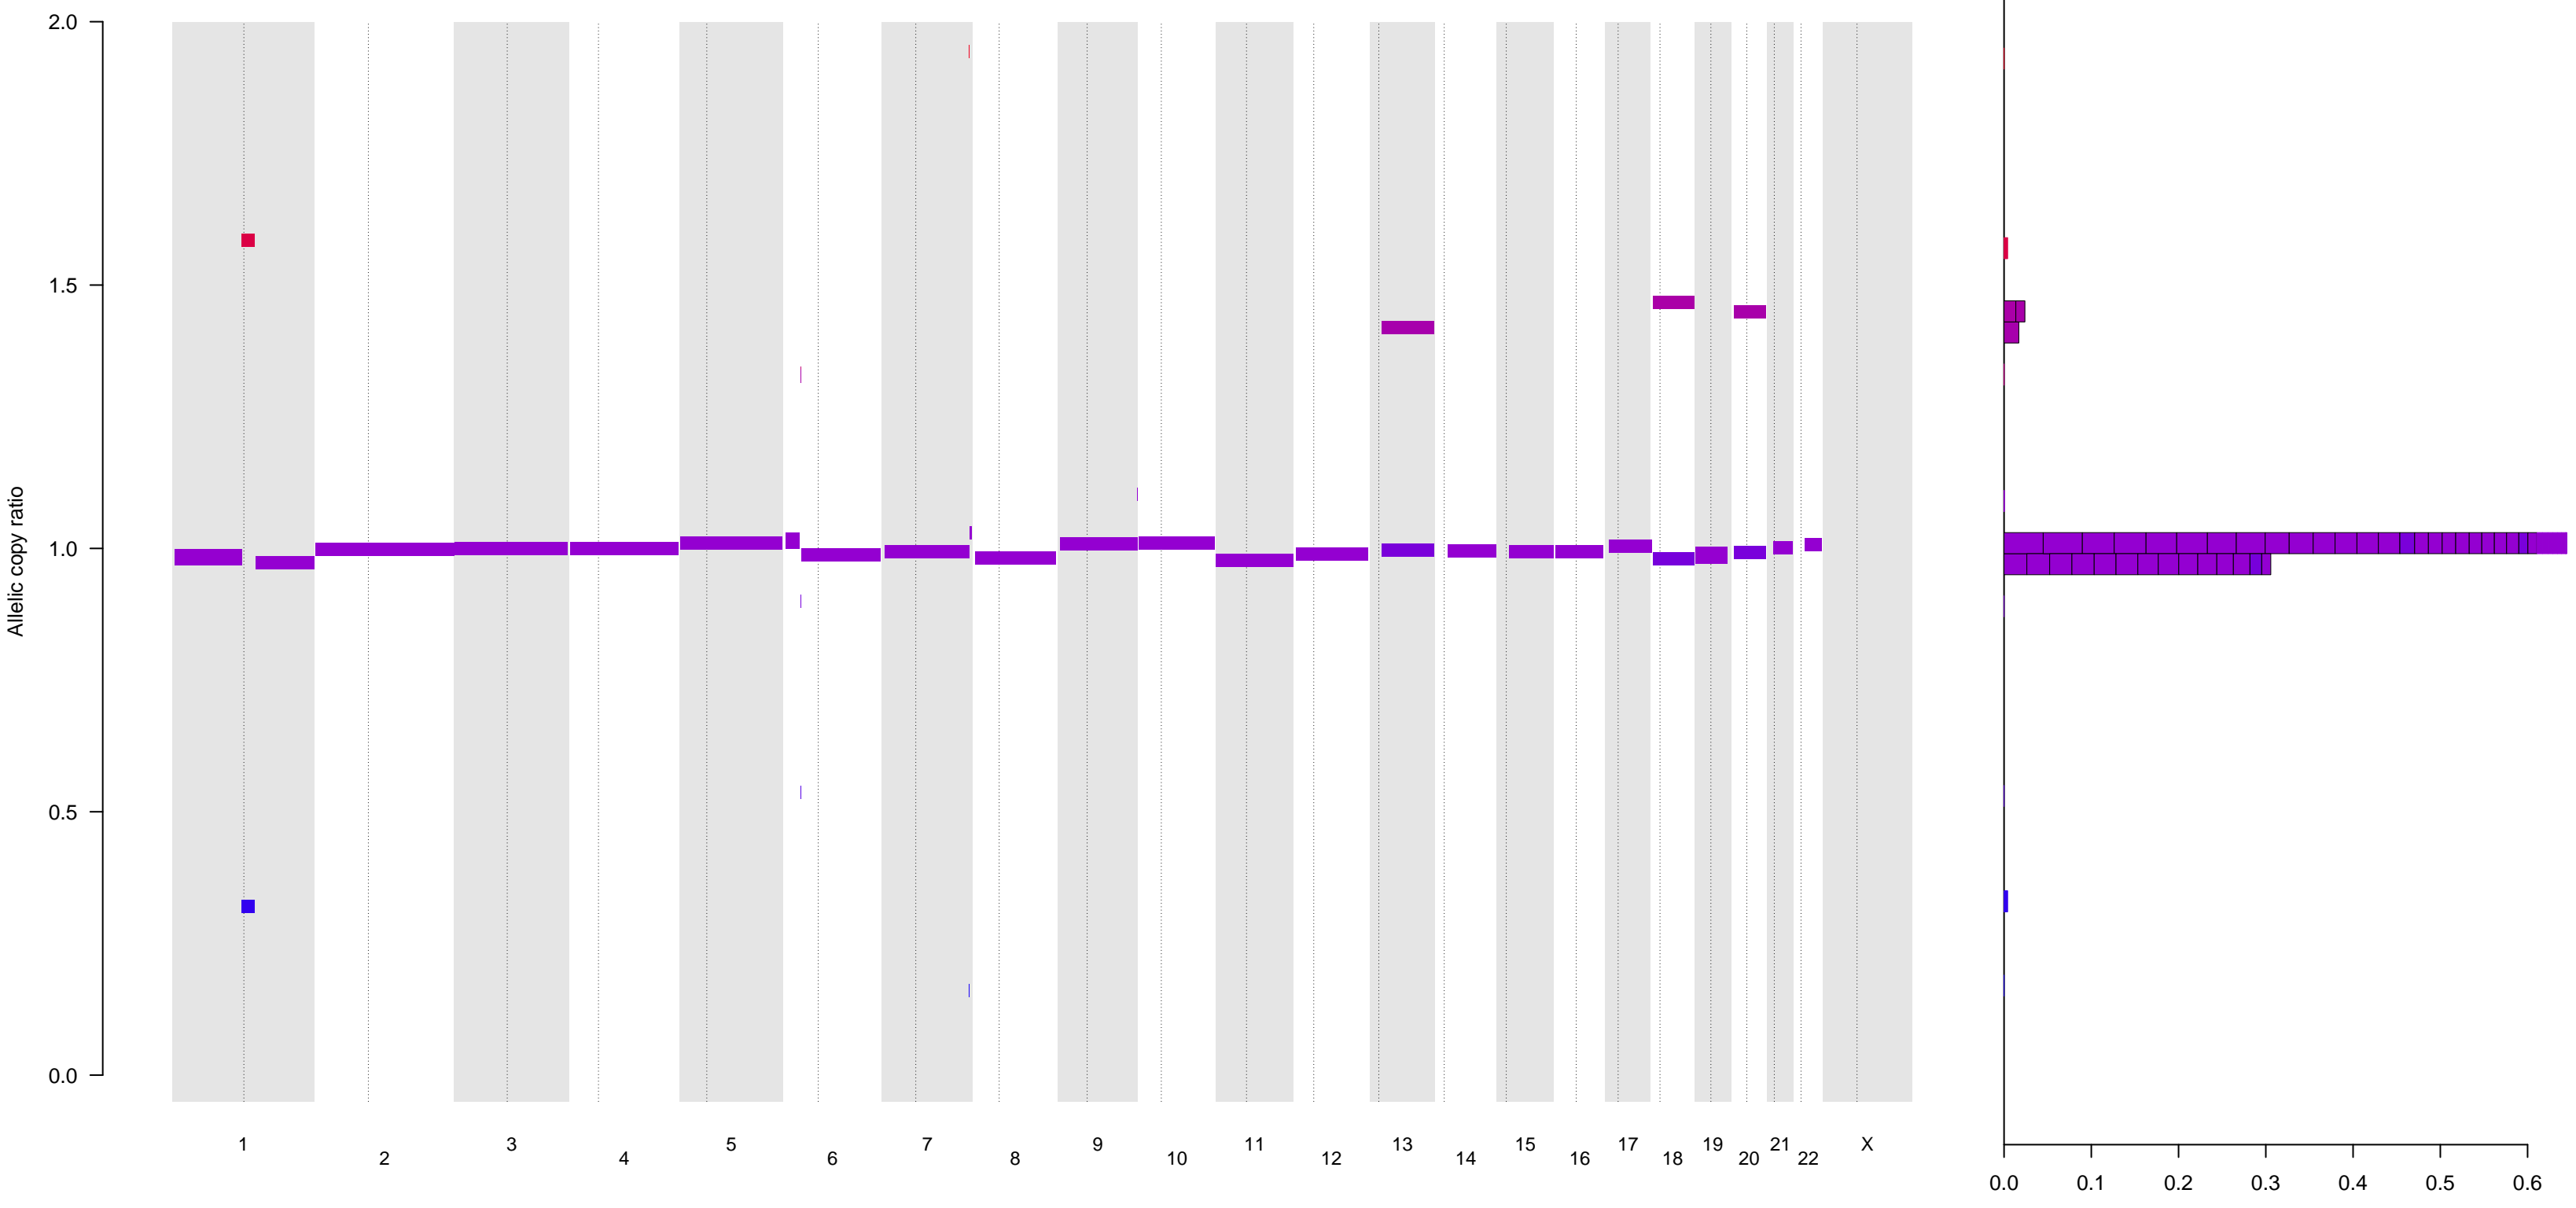

purity( $\hat{\alpha}$ ) = 0.47, ploidy:  $\hat{t} = 2.02$ ,  $\hat{t}_g = 2.08$   
 $\theta_z = 0$ ,  $\theta_0 = 1.307$ , WGD=0  
 SCNA LL = -113.63, SSNV LL = -7532.66, SCNA Ev = -39.32484

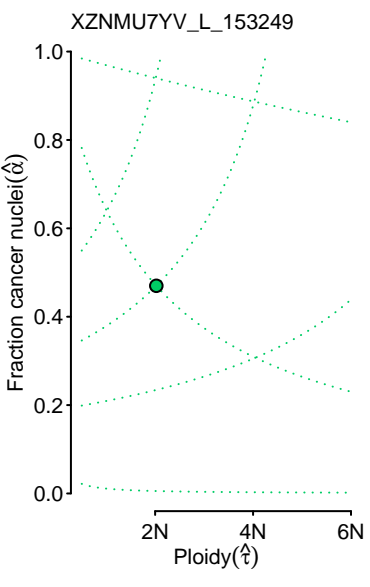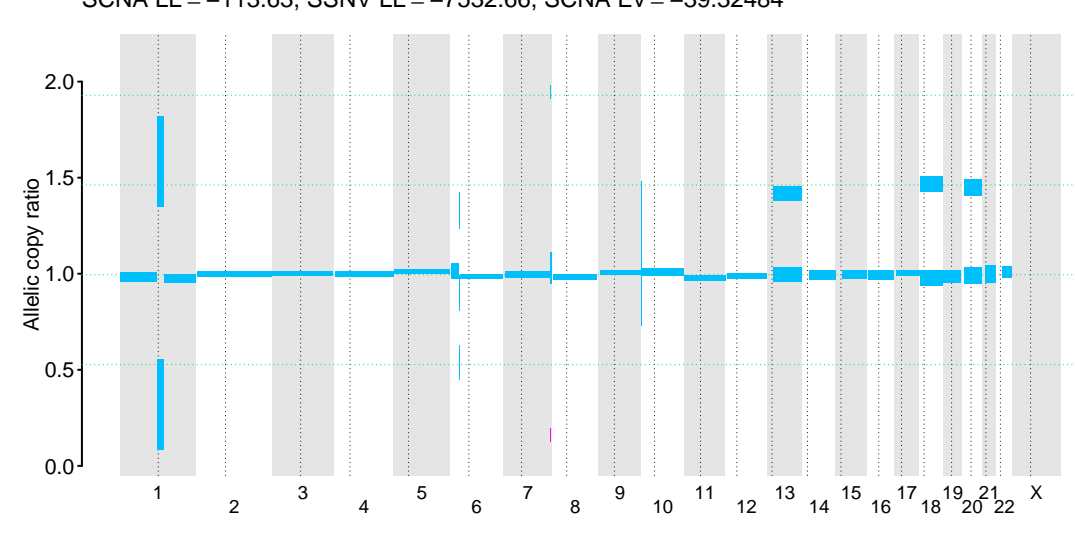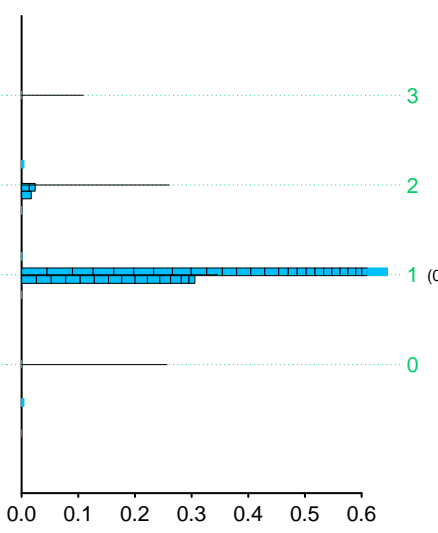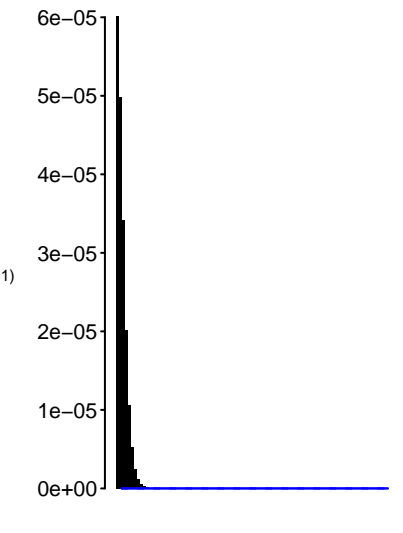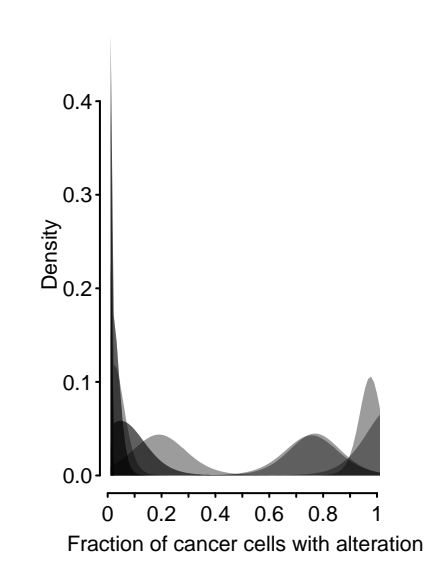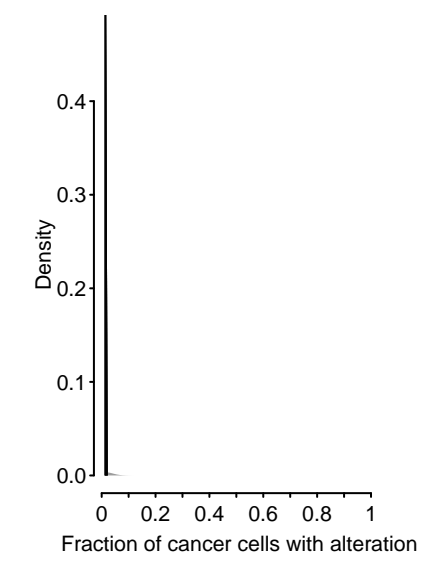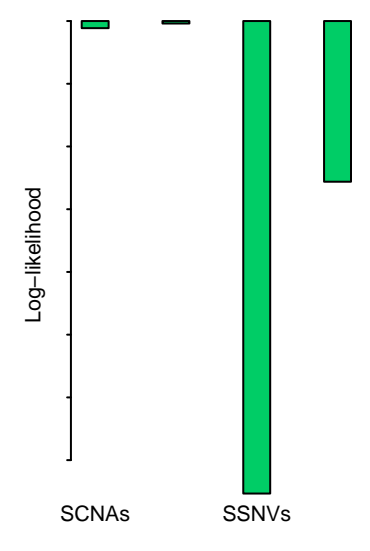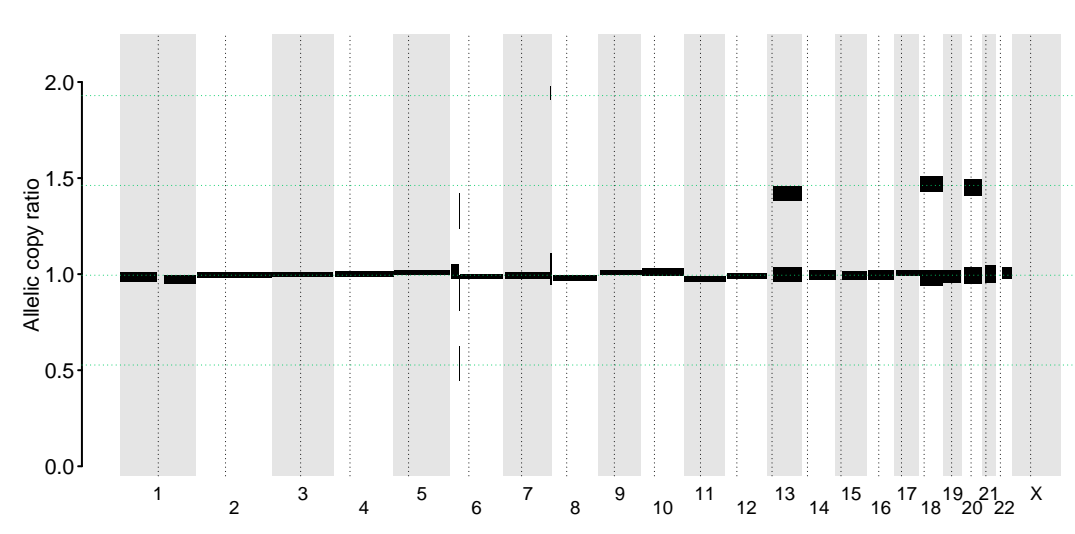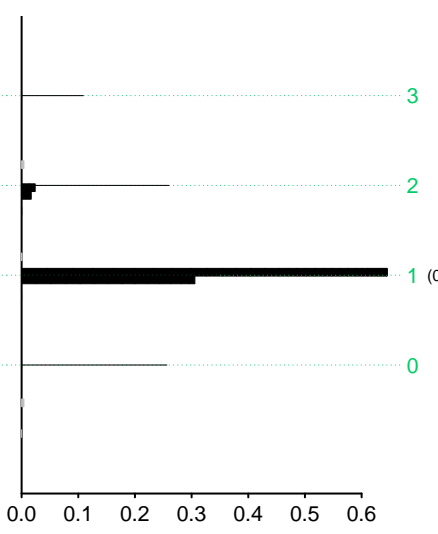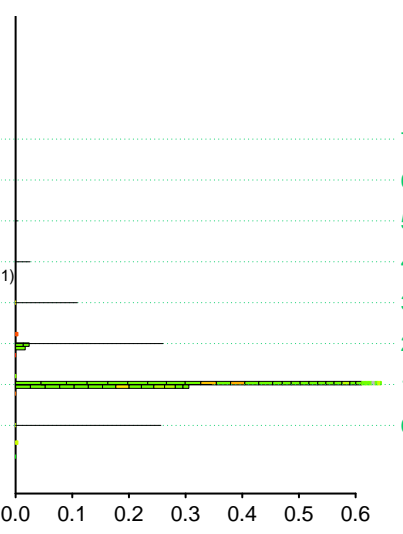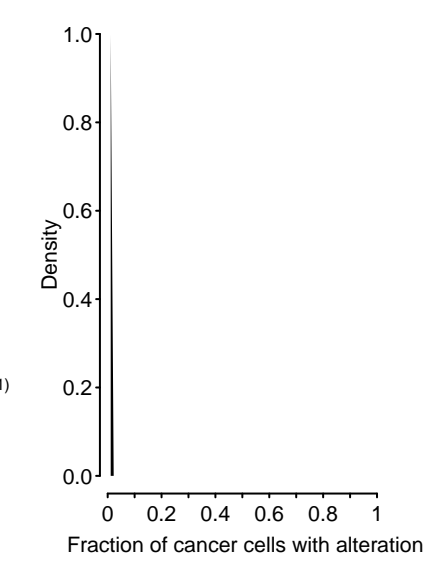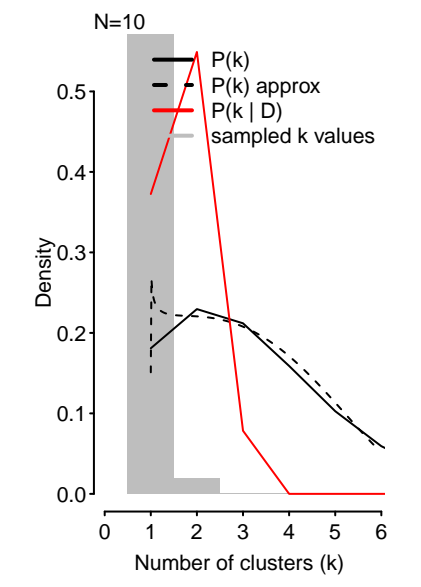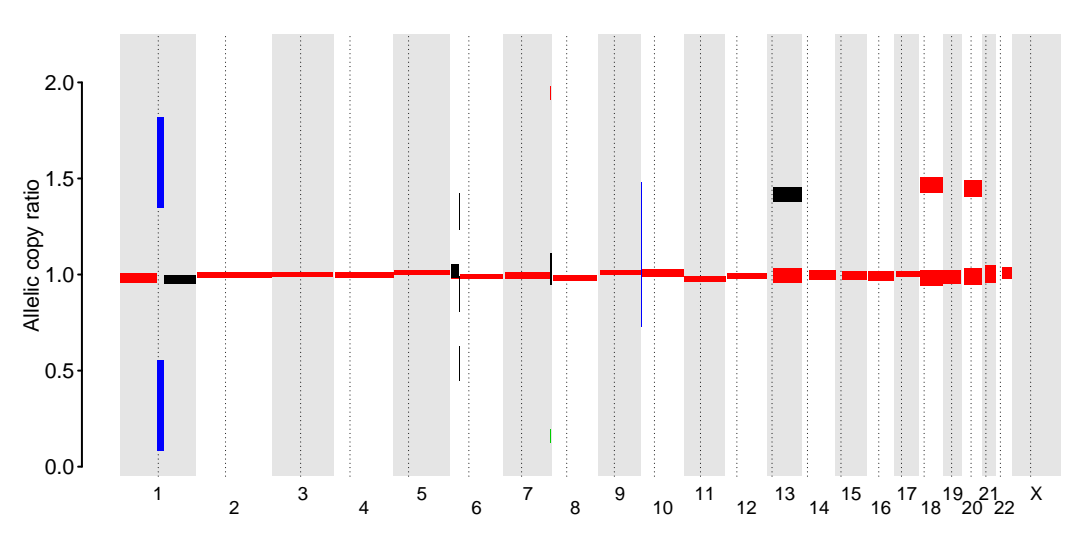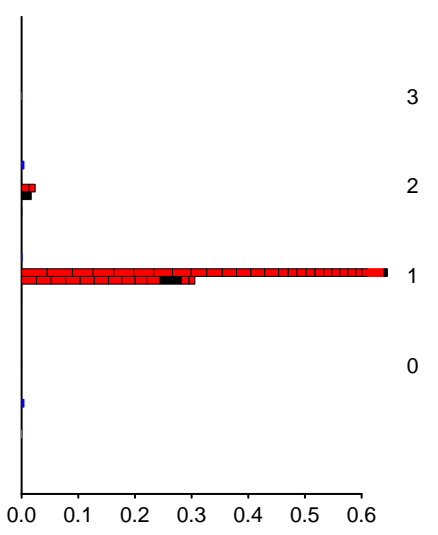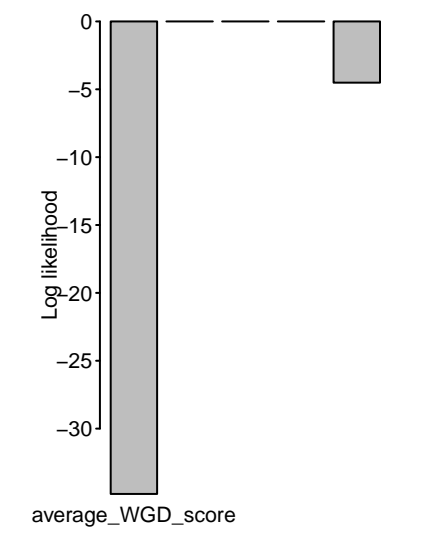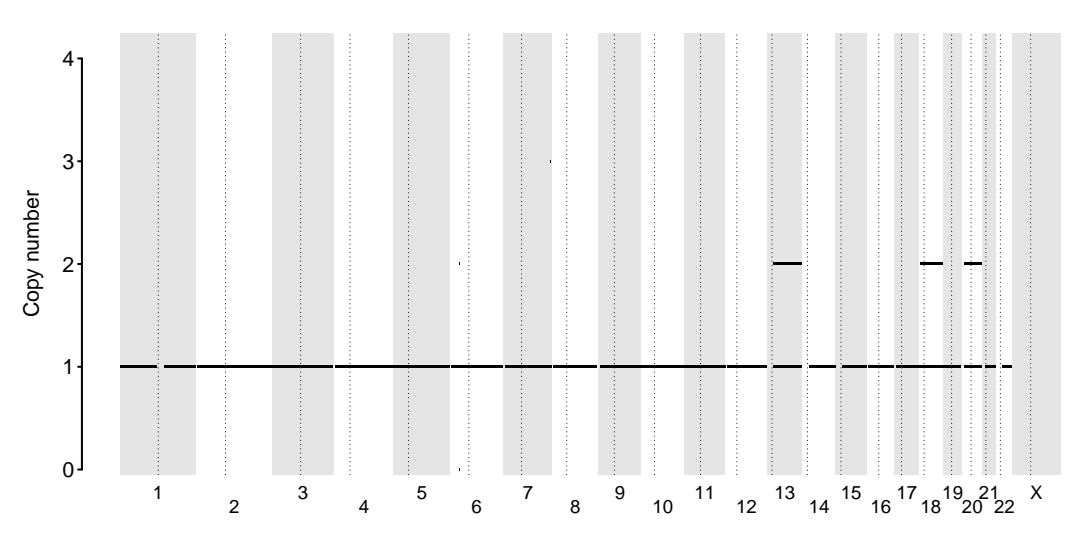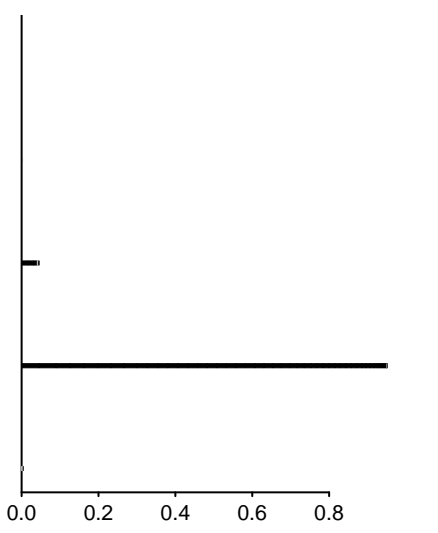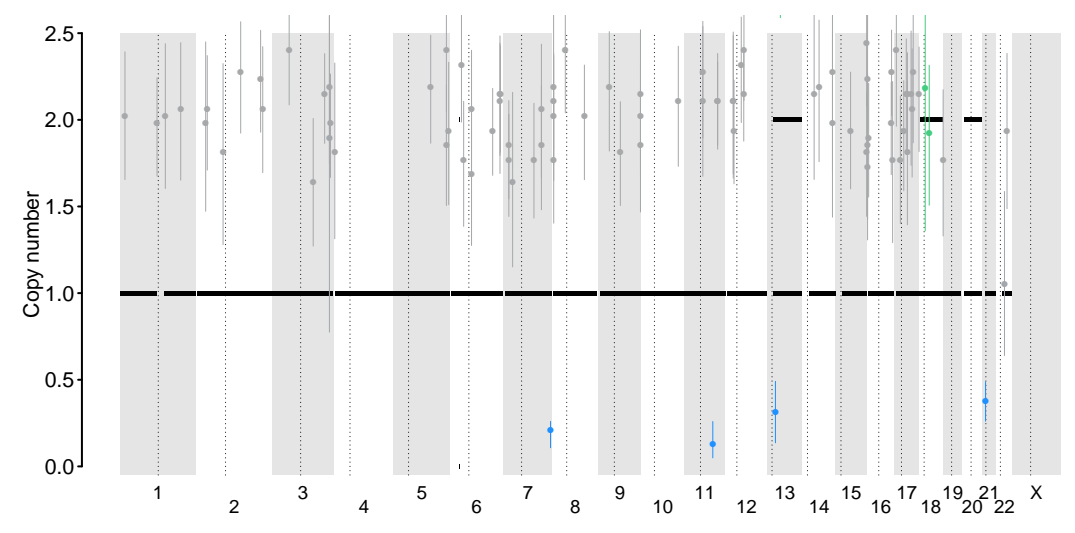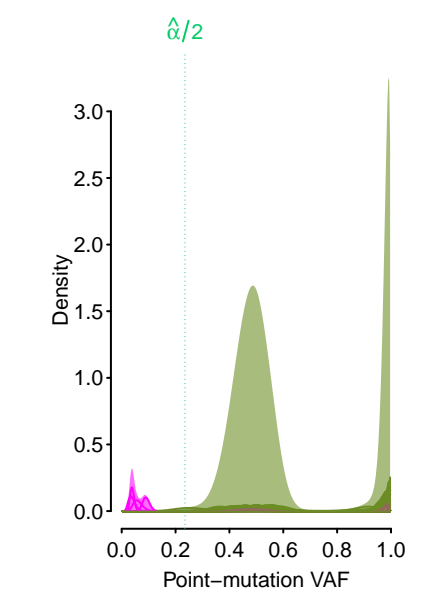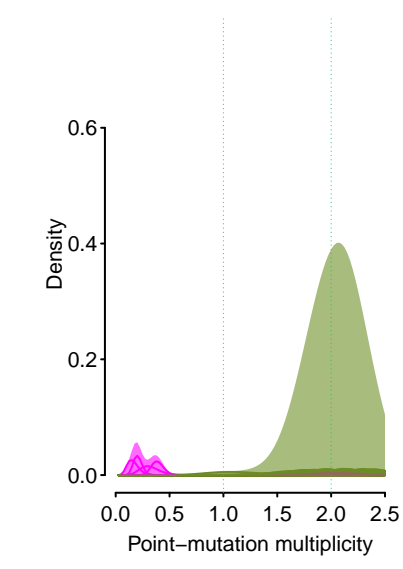

Sample 103

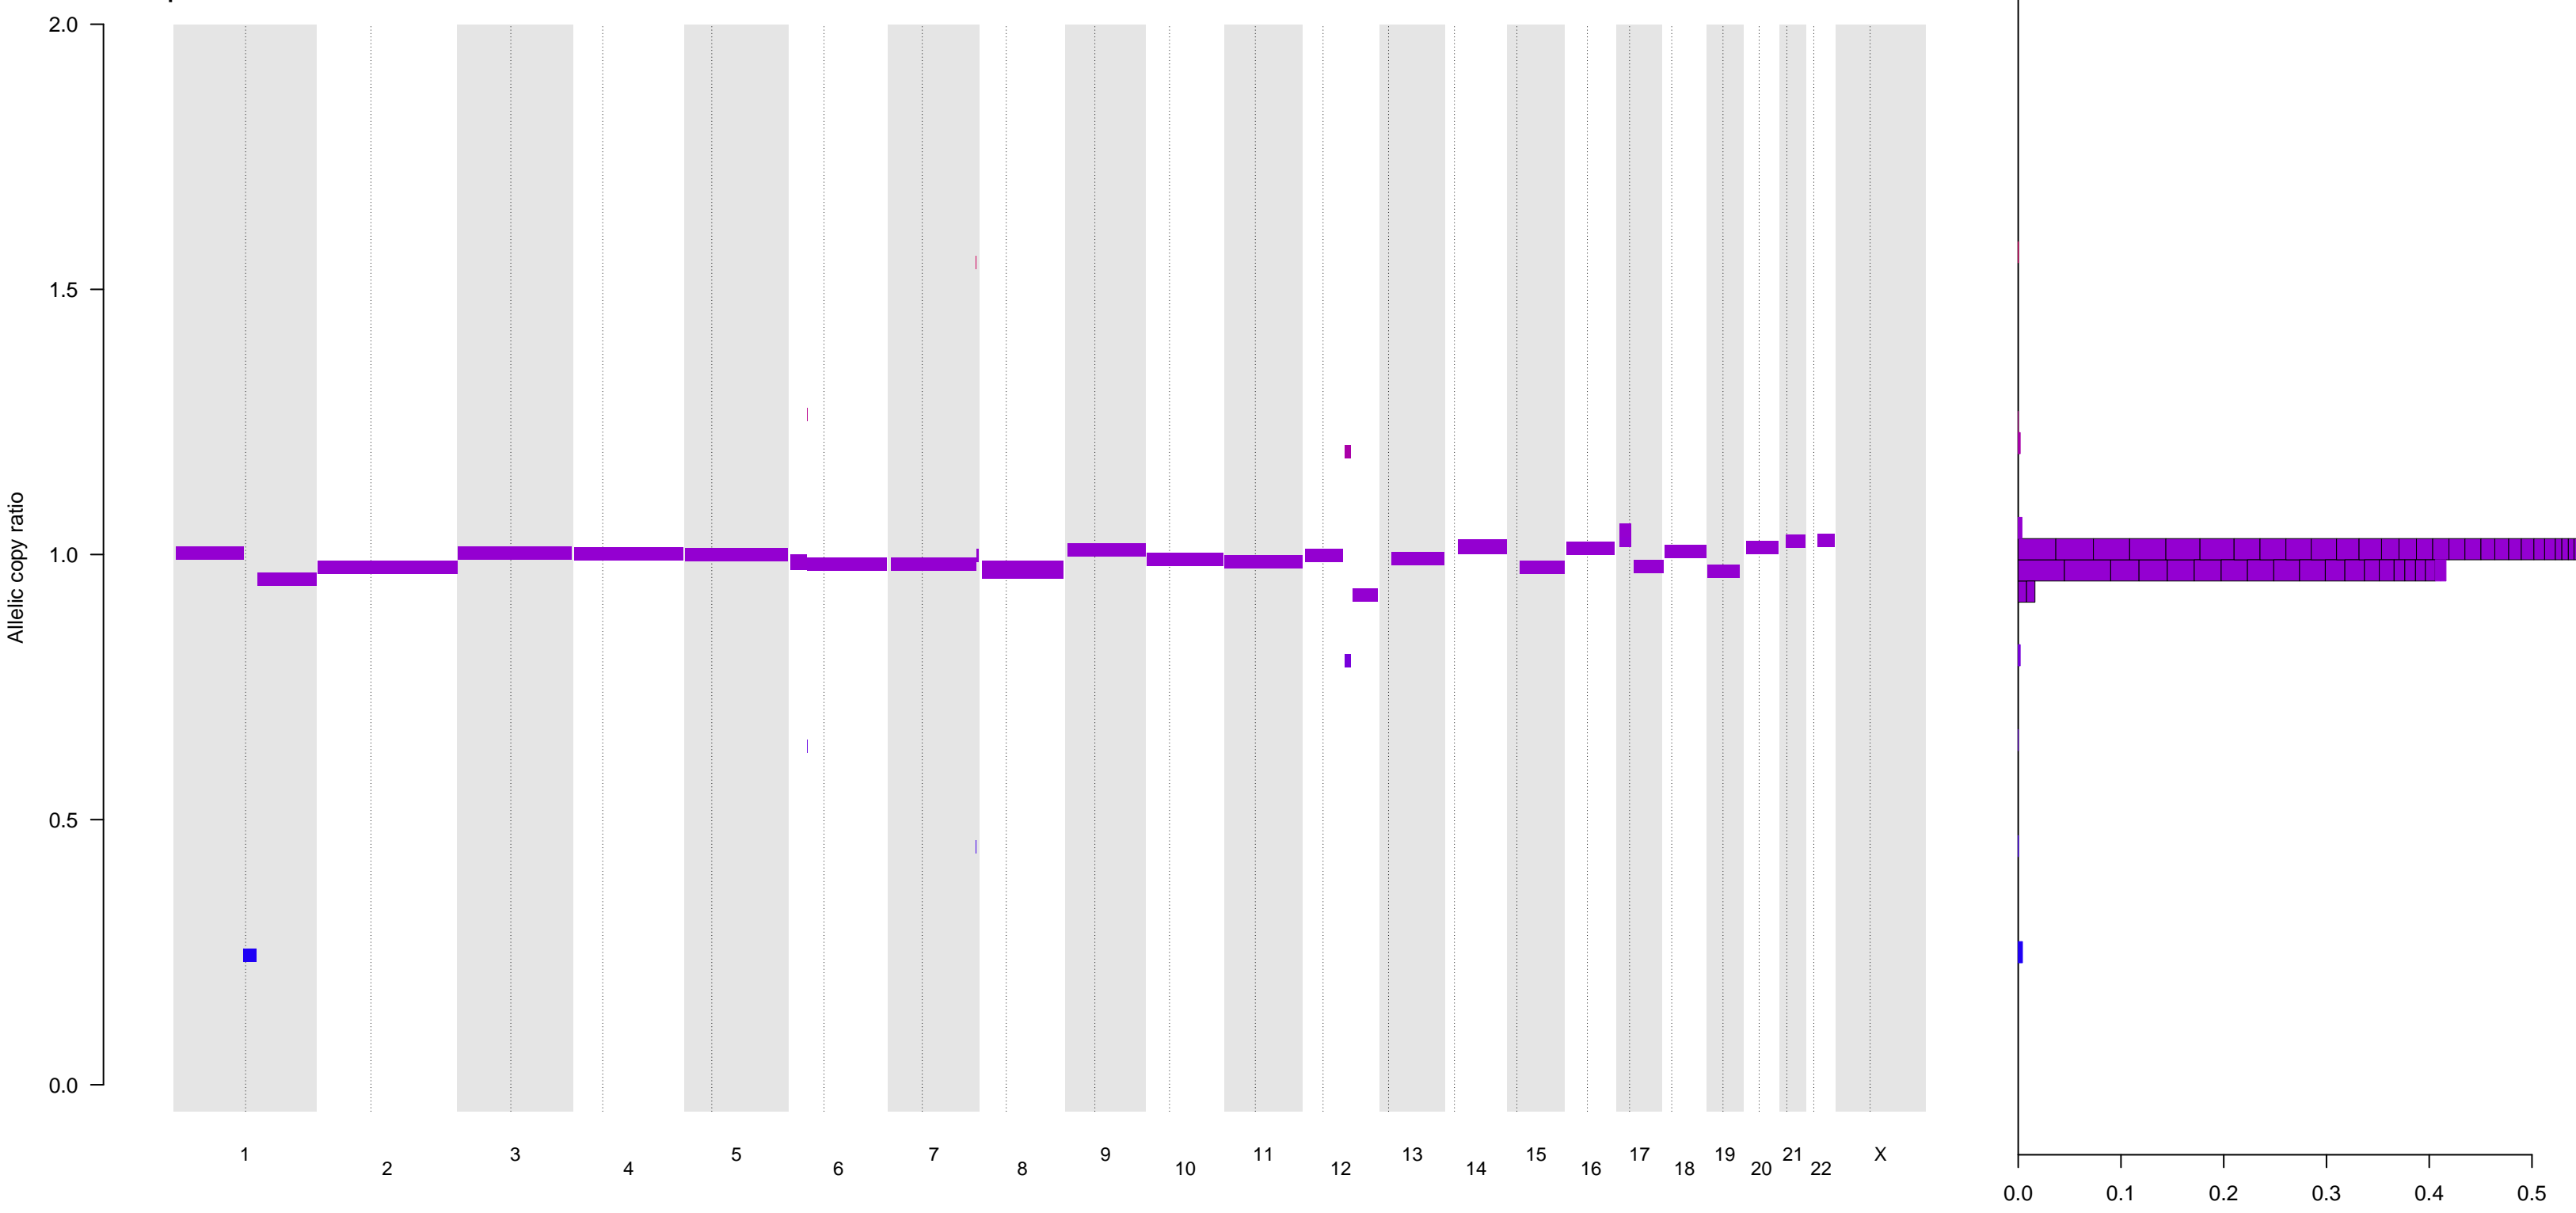

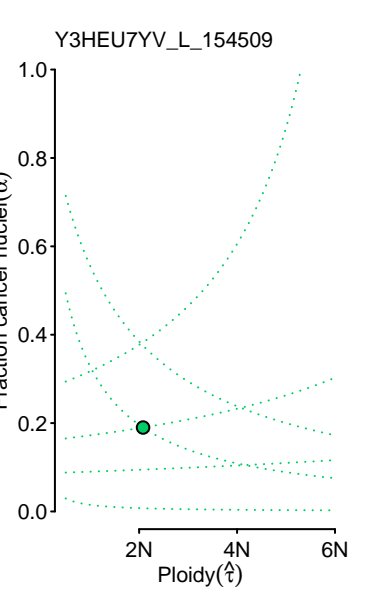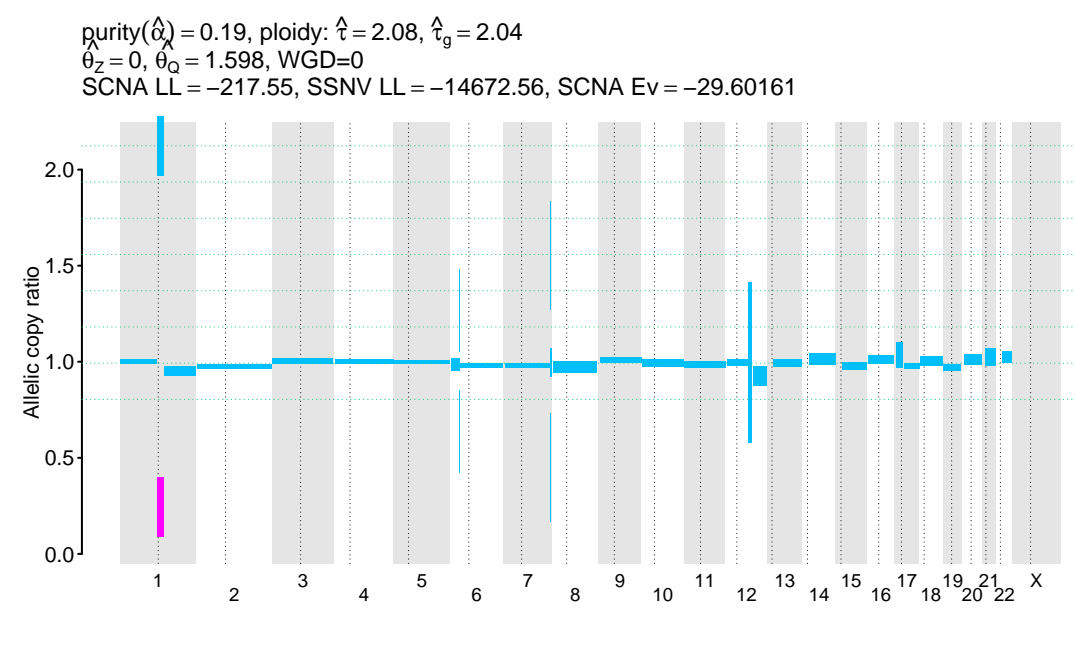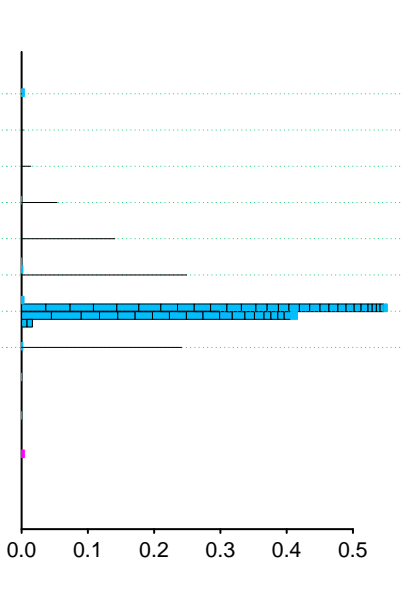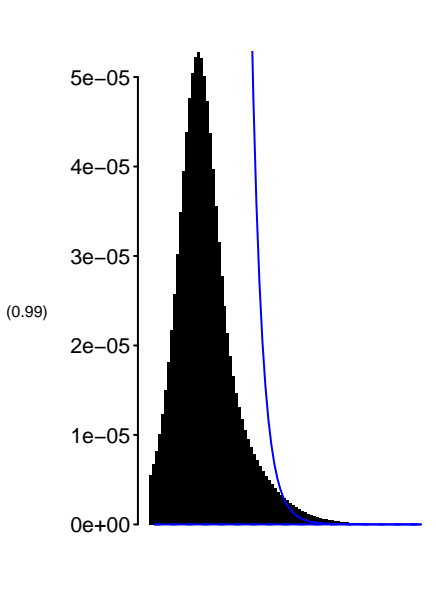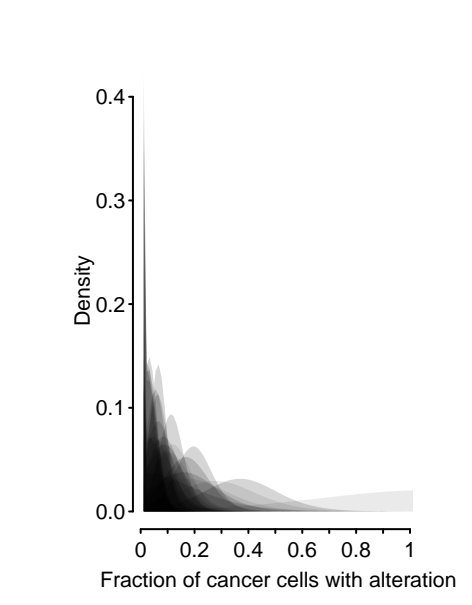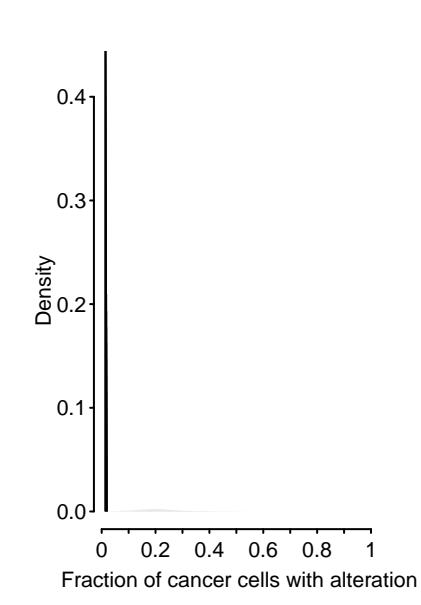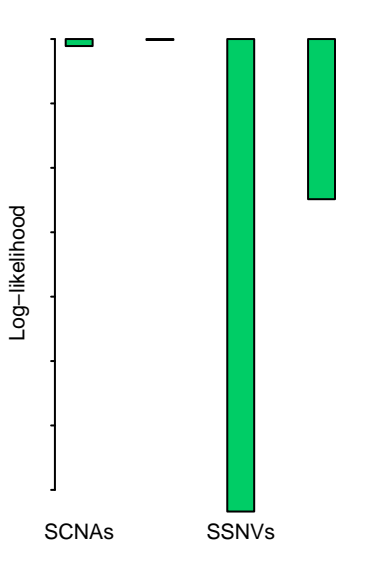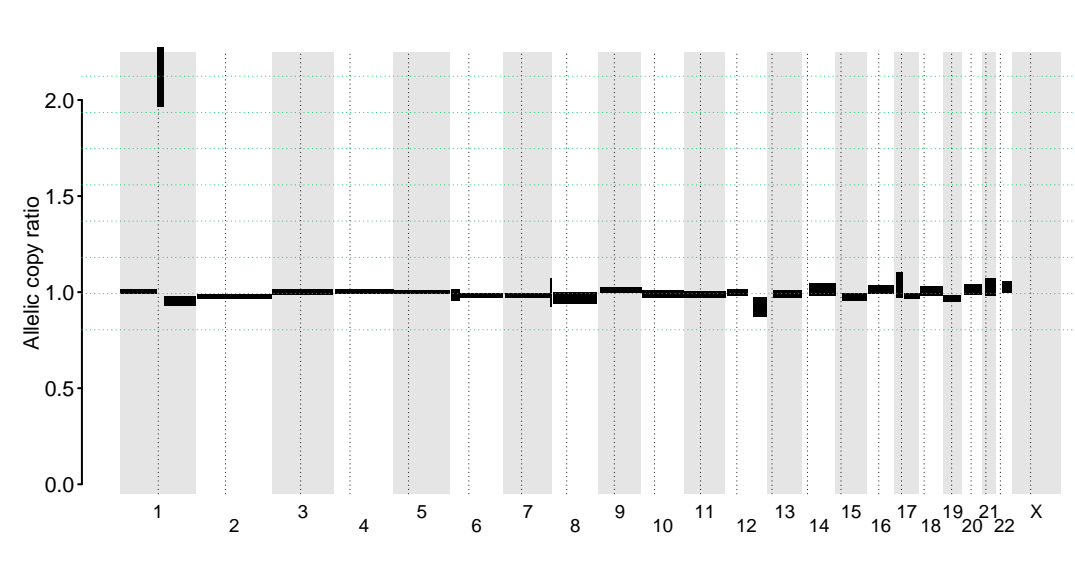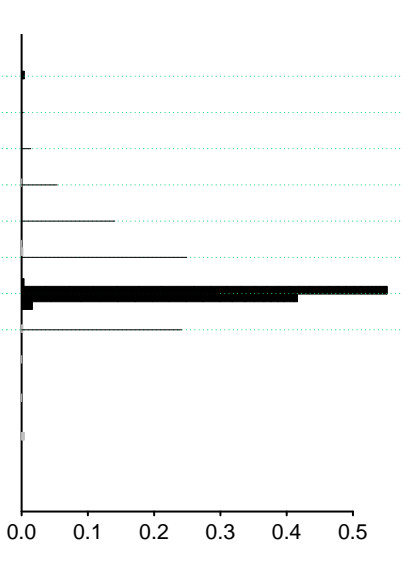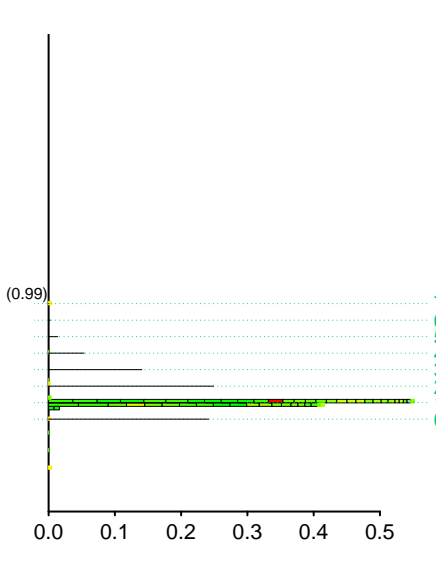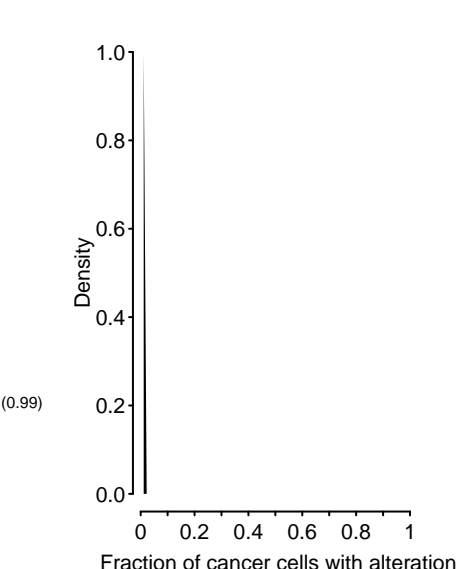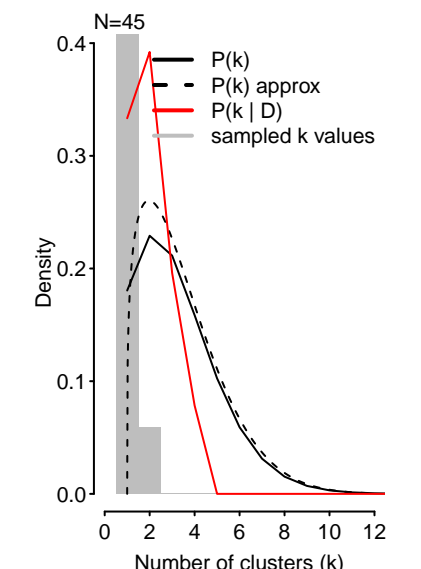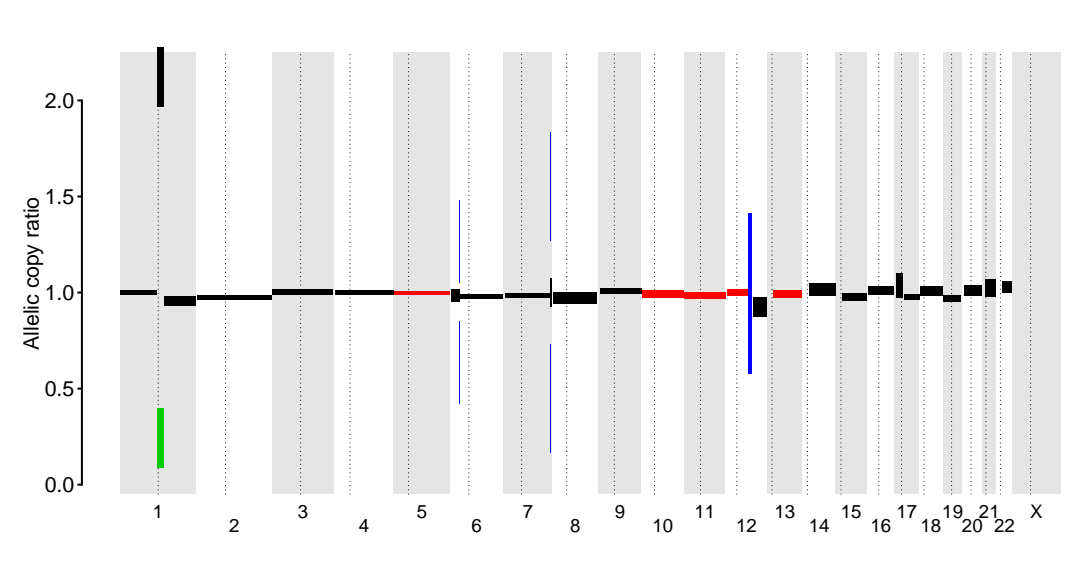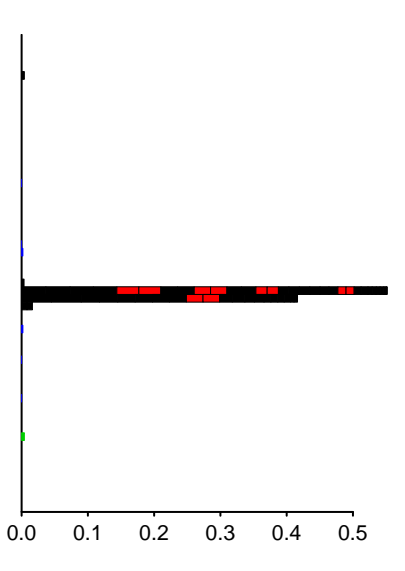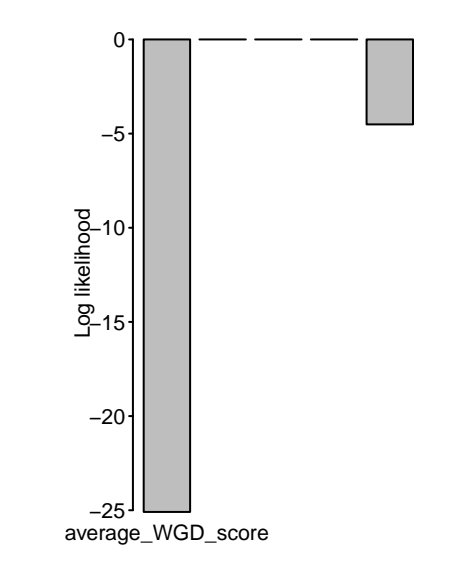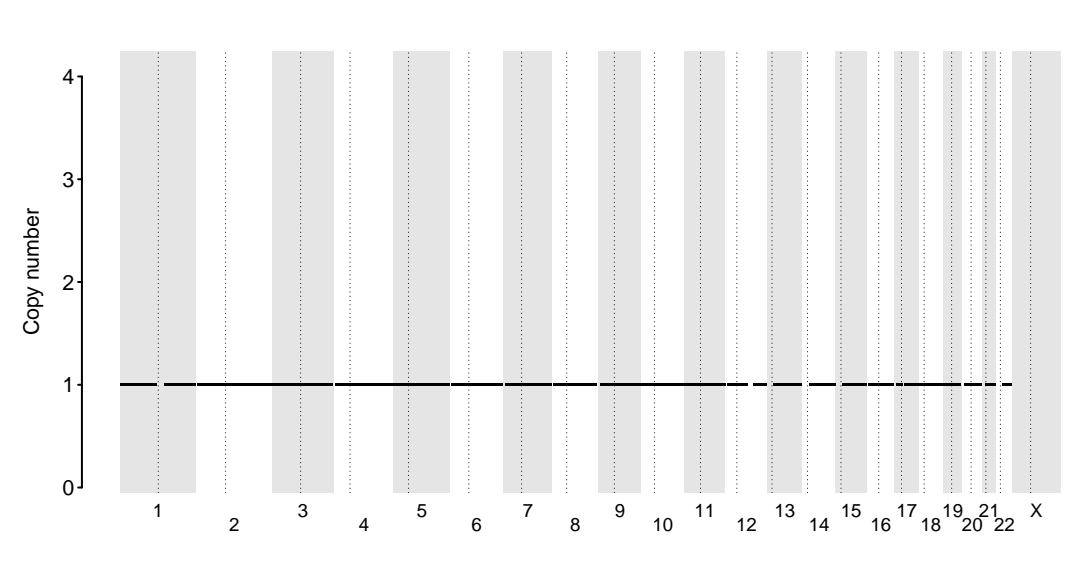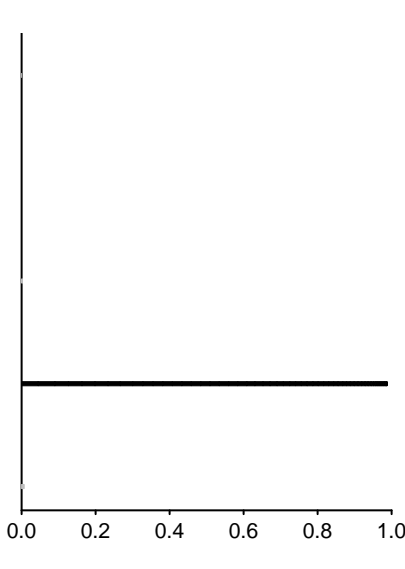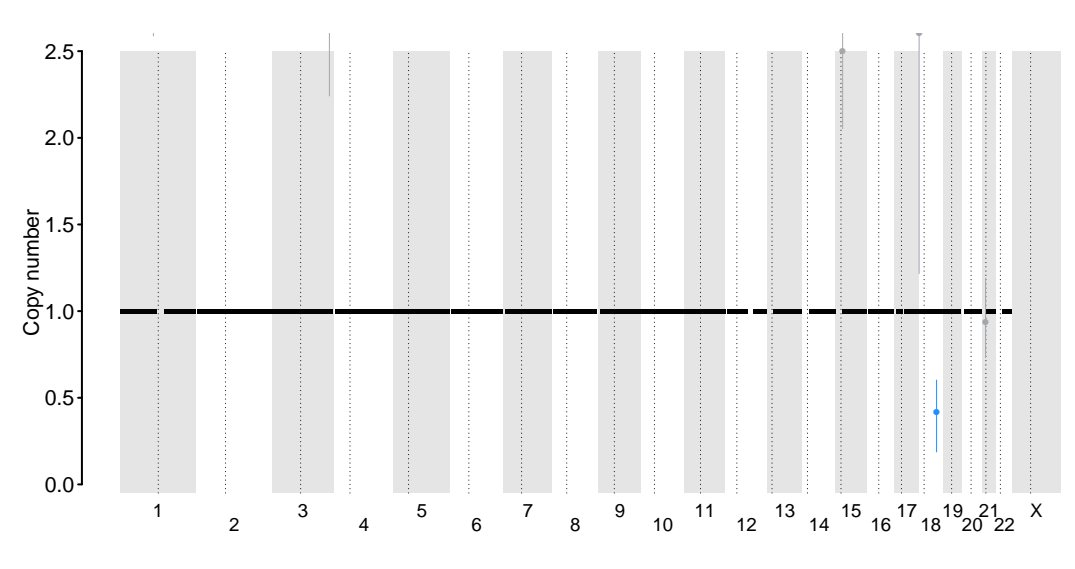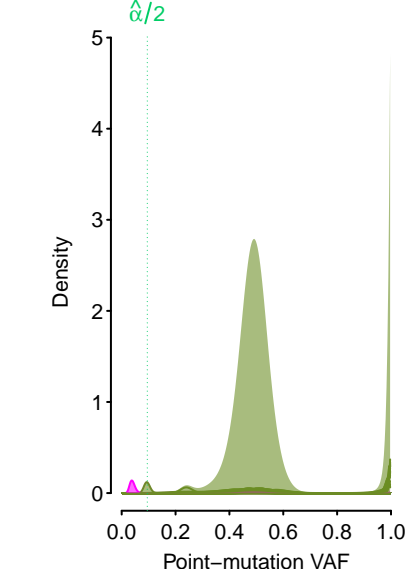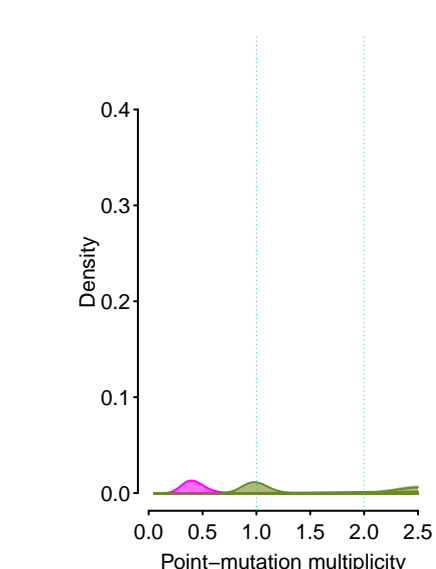

Sample 104

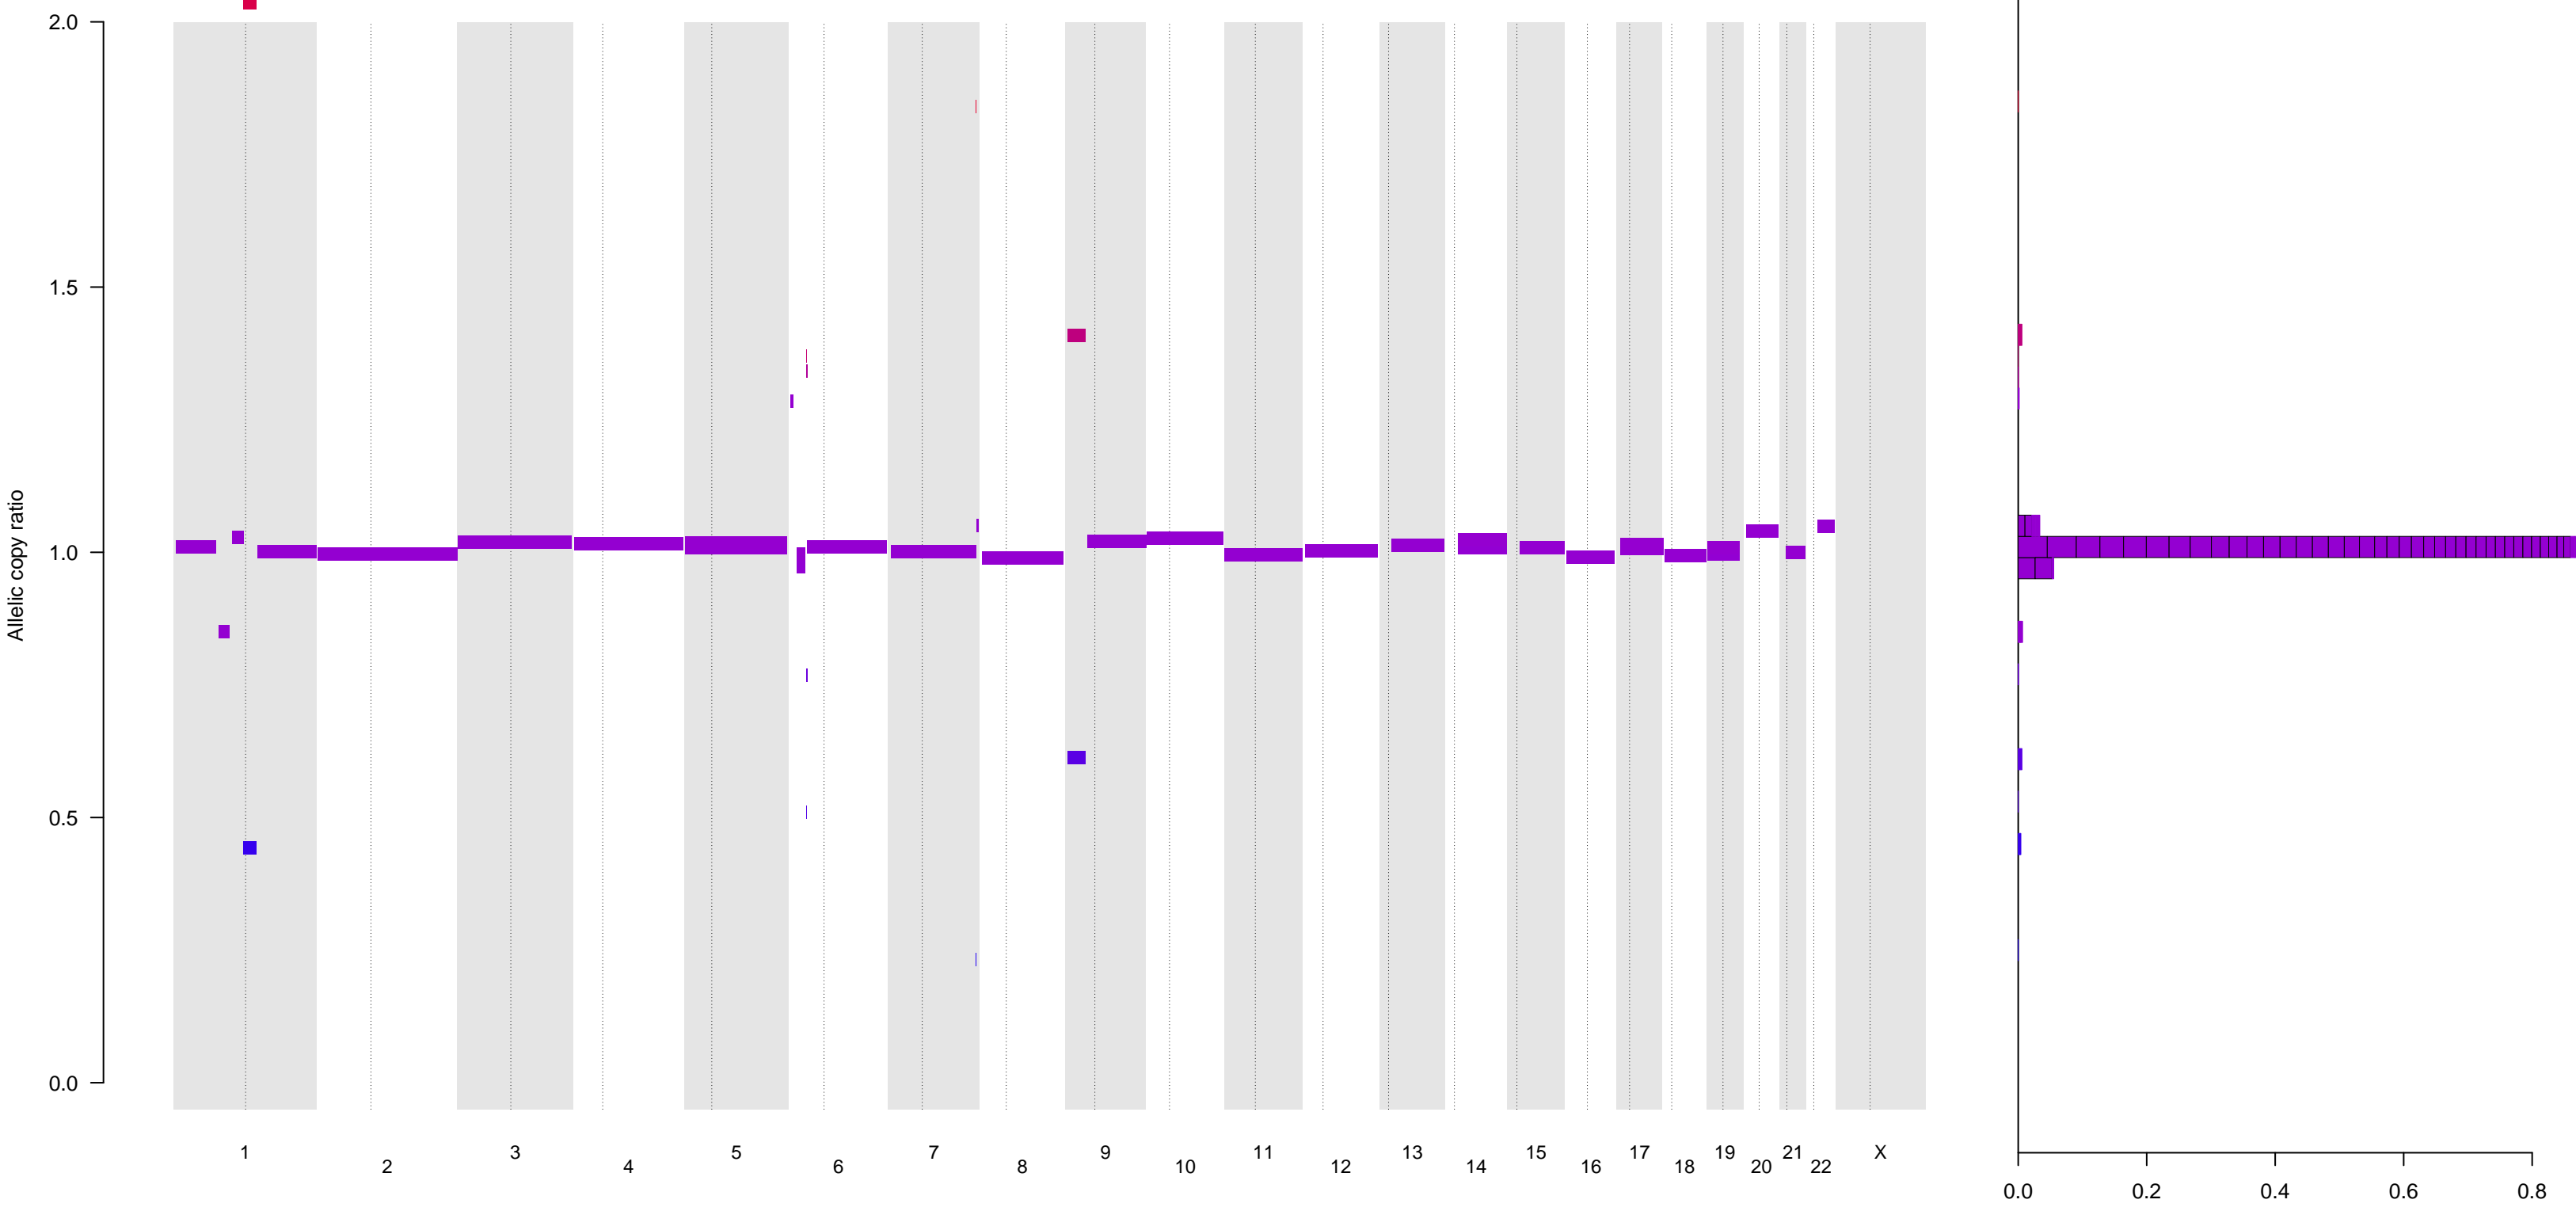

purity( $\hat{\alpha}$ ) = 0.37, ploidy:  $\hat{t} = 1.97$ ,  $\hat{t}_g = 2.02$   
 $\theta_z = 0$ ,  $\theta_0 = 1.358$ , WGD=0  
 SCNA LL = -159.18, SSNV LL = -6517.59, SCNA Ev = -33.49066

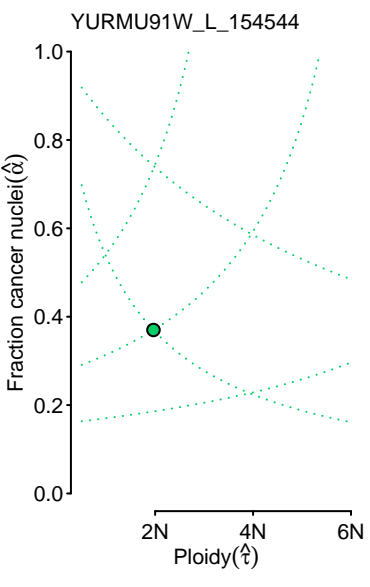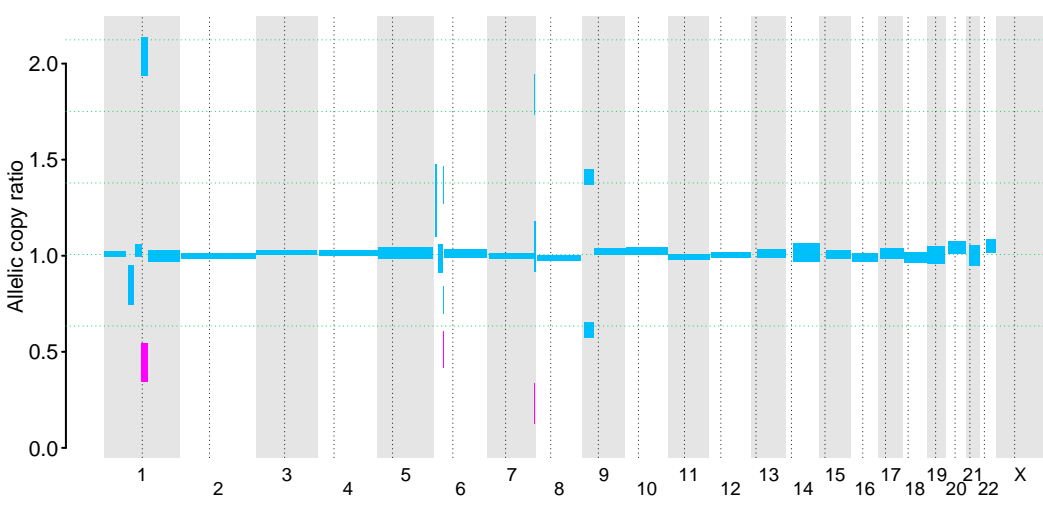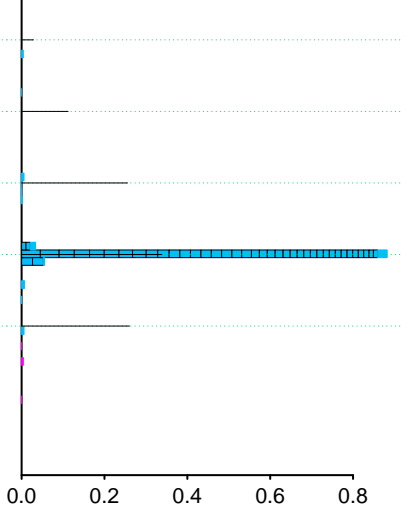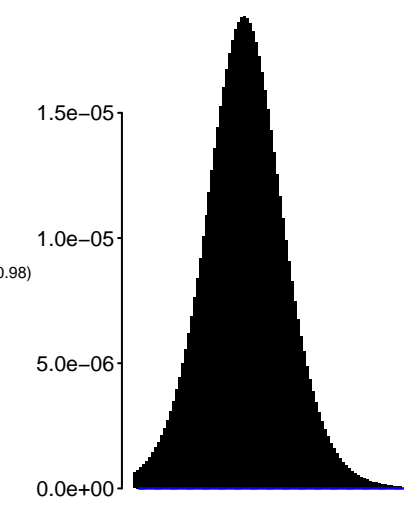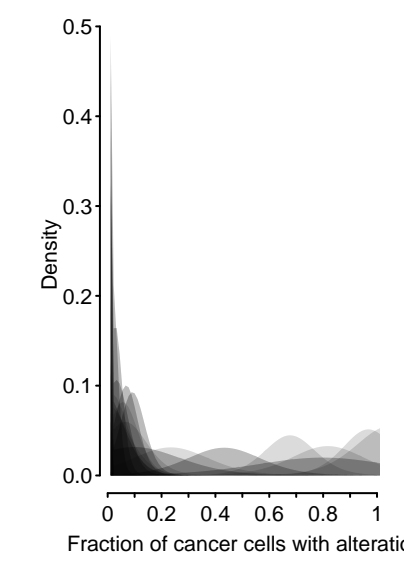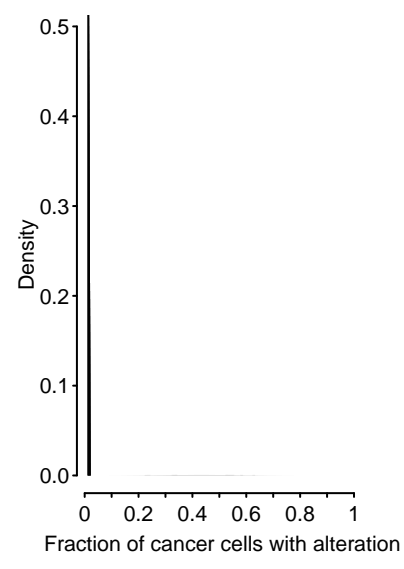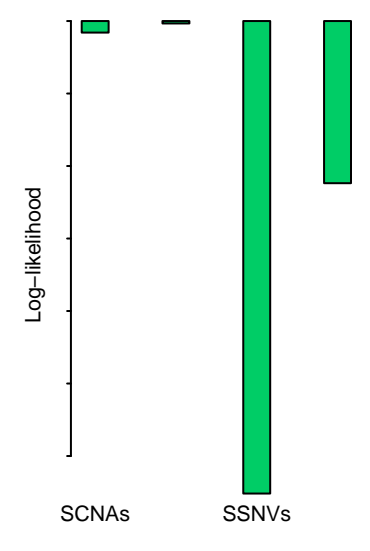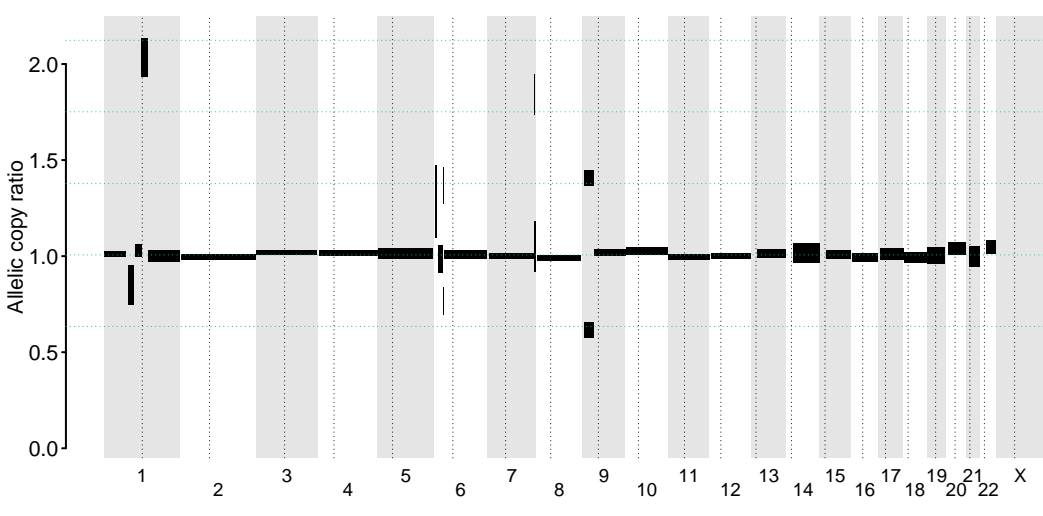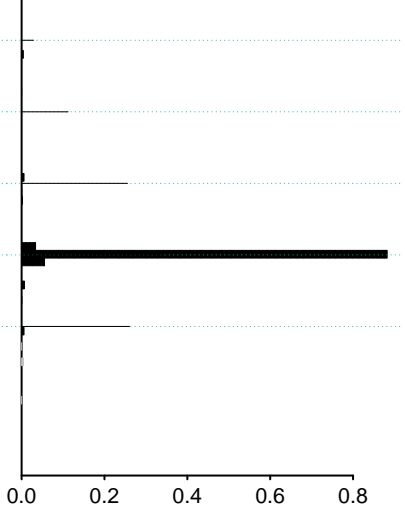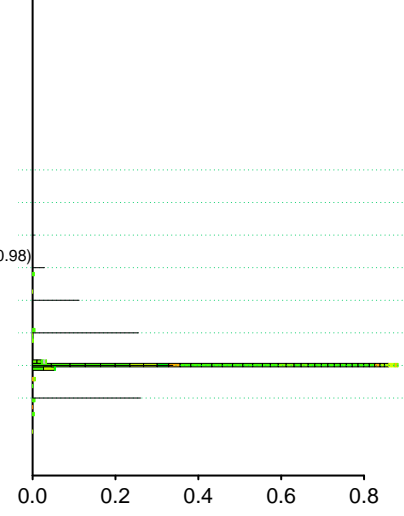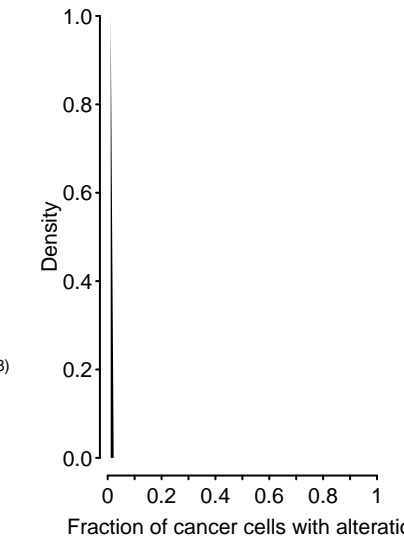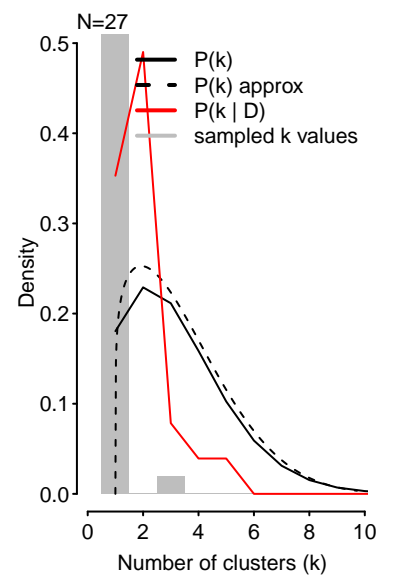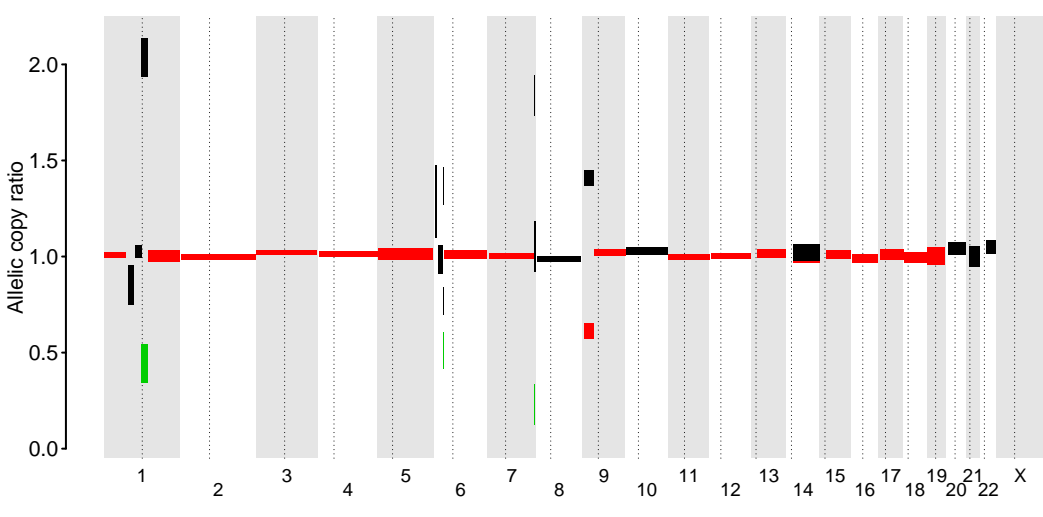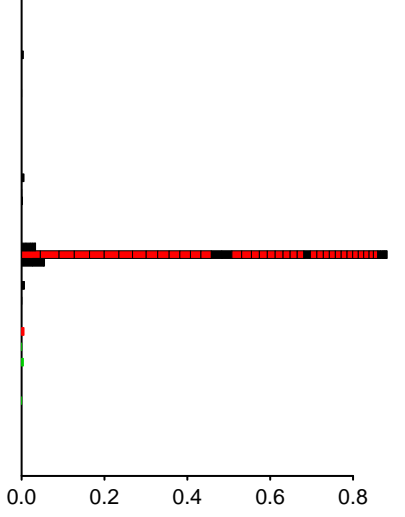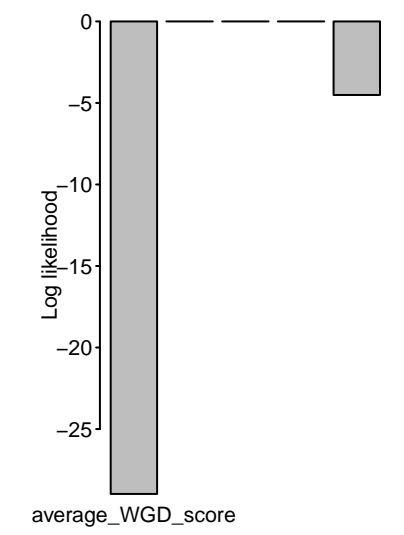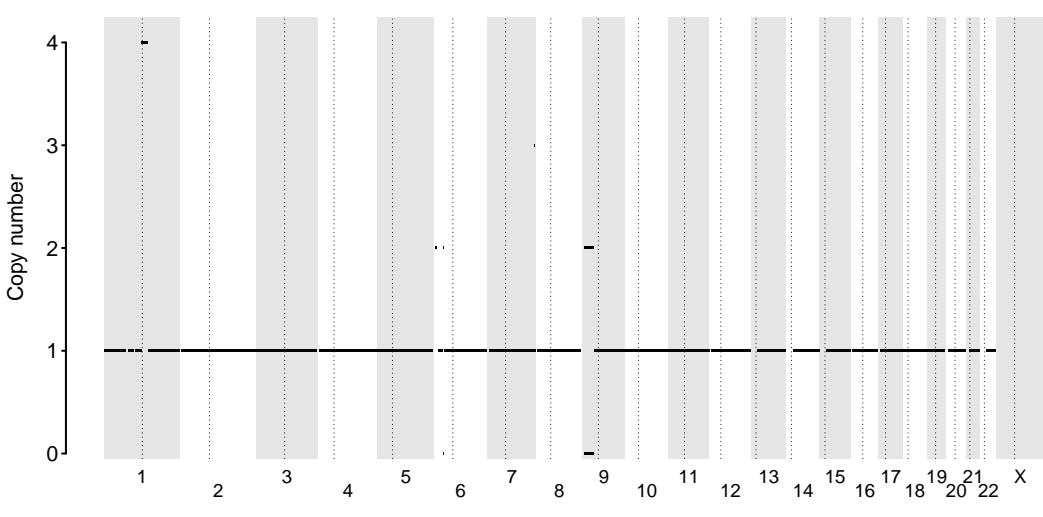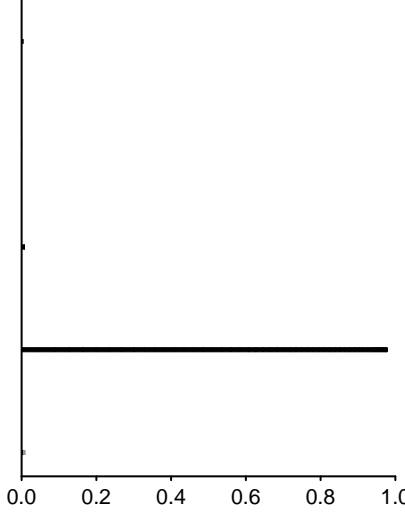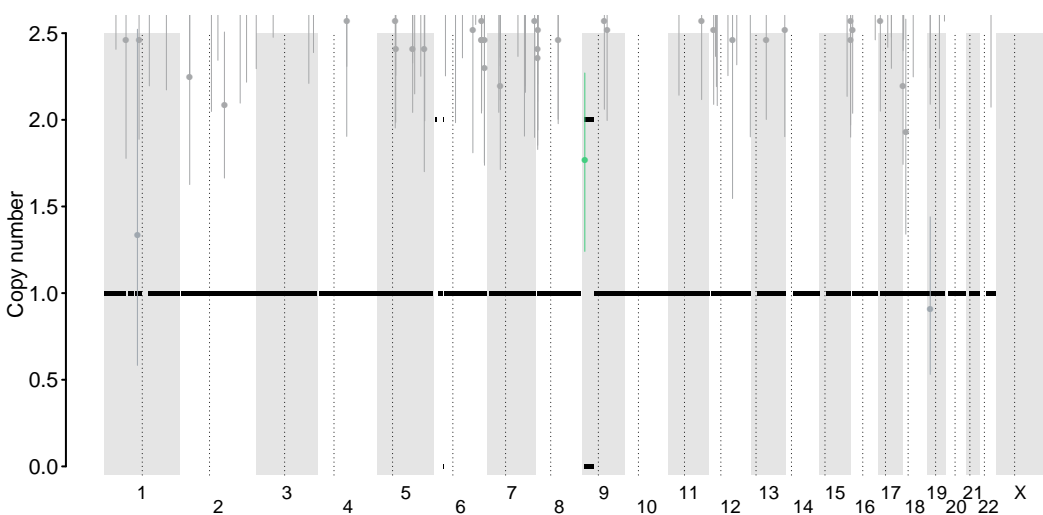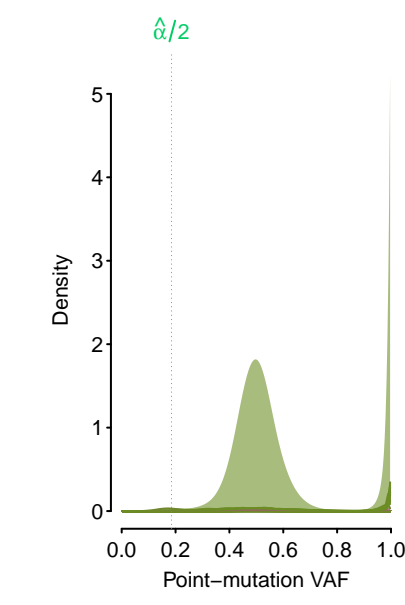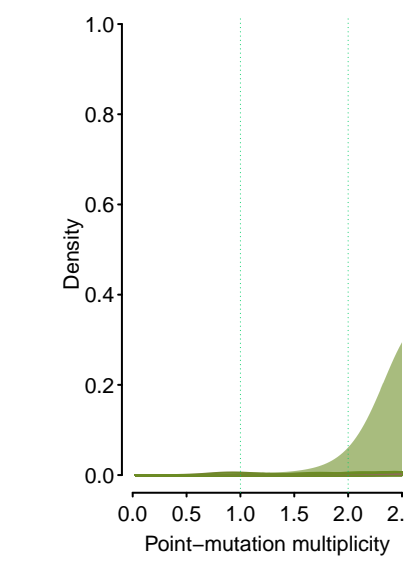

Sample 105

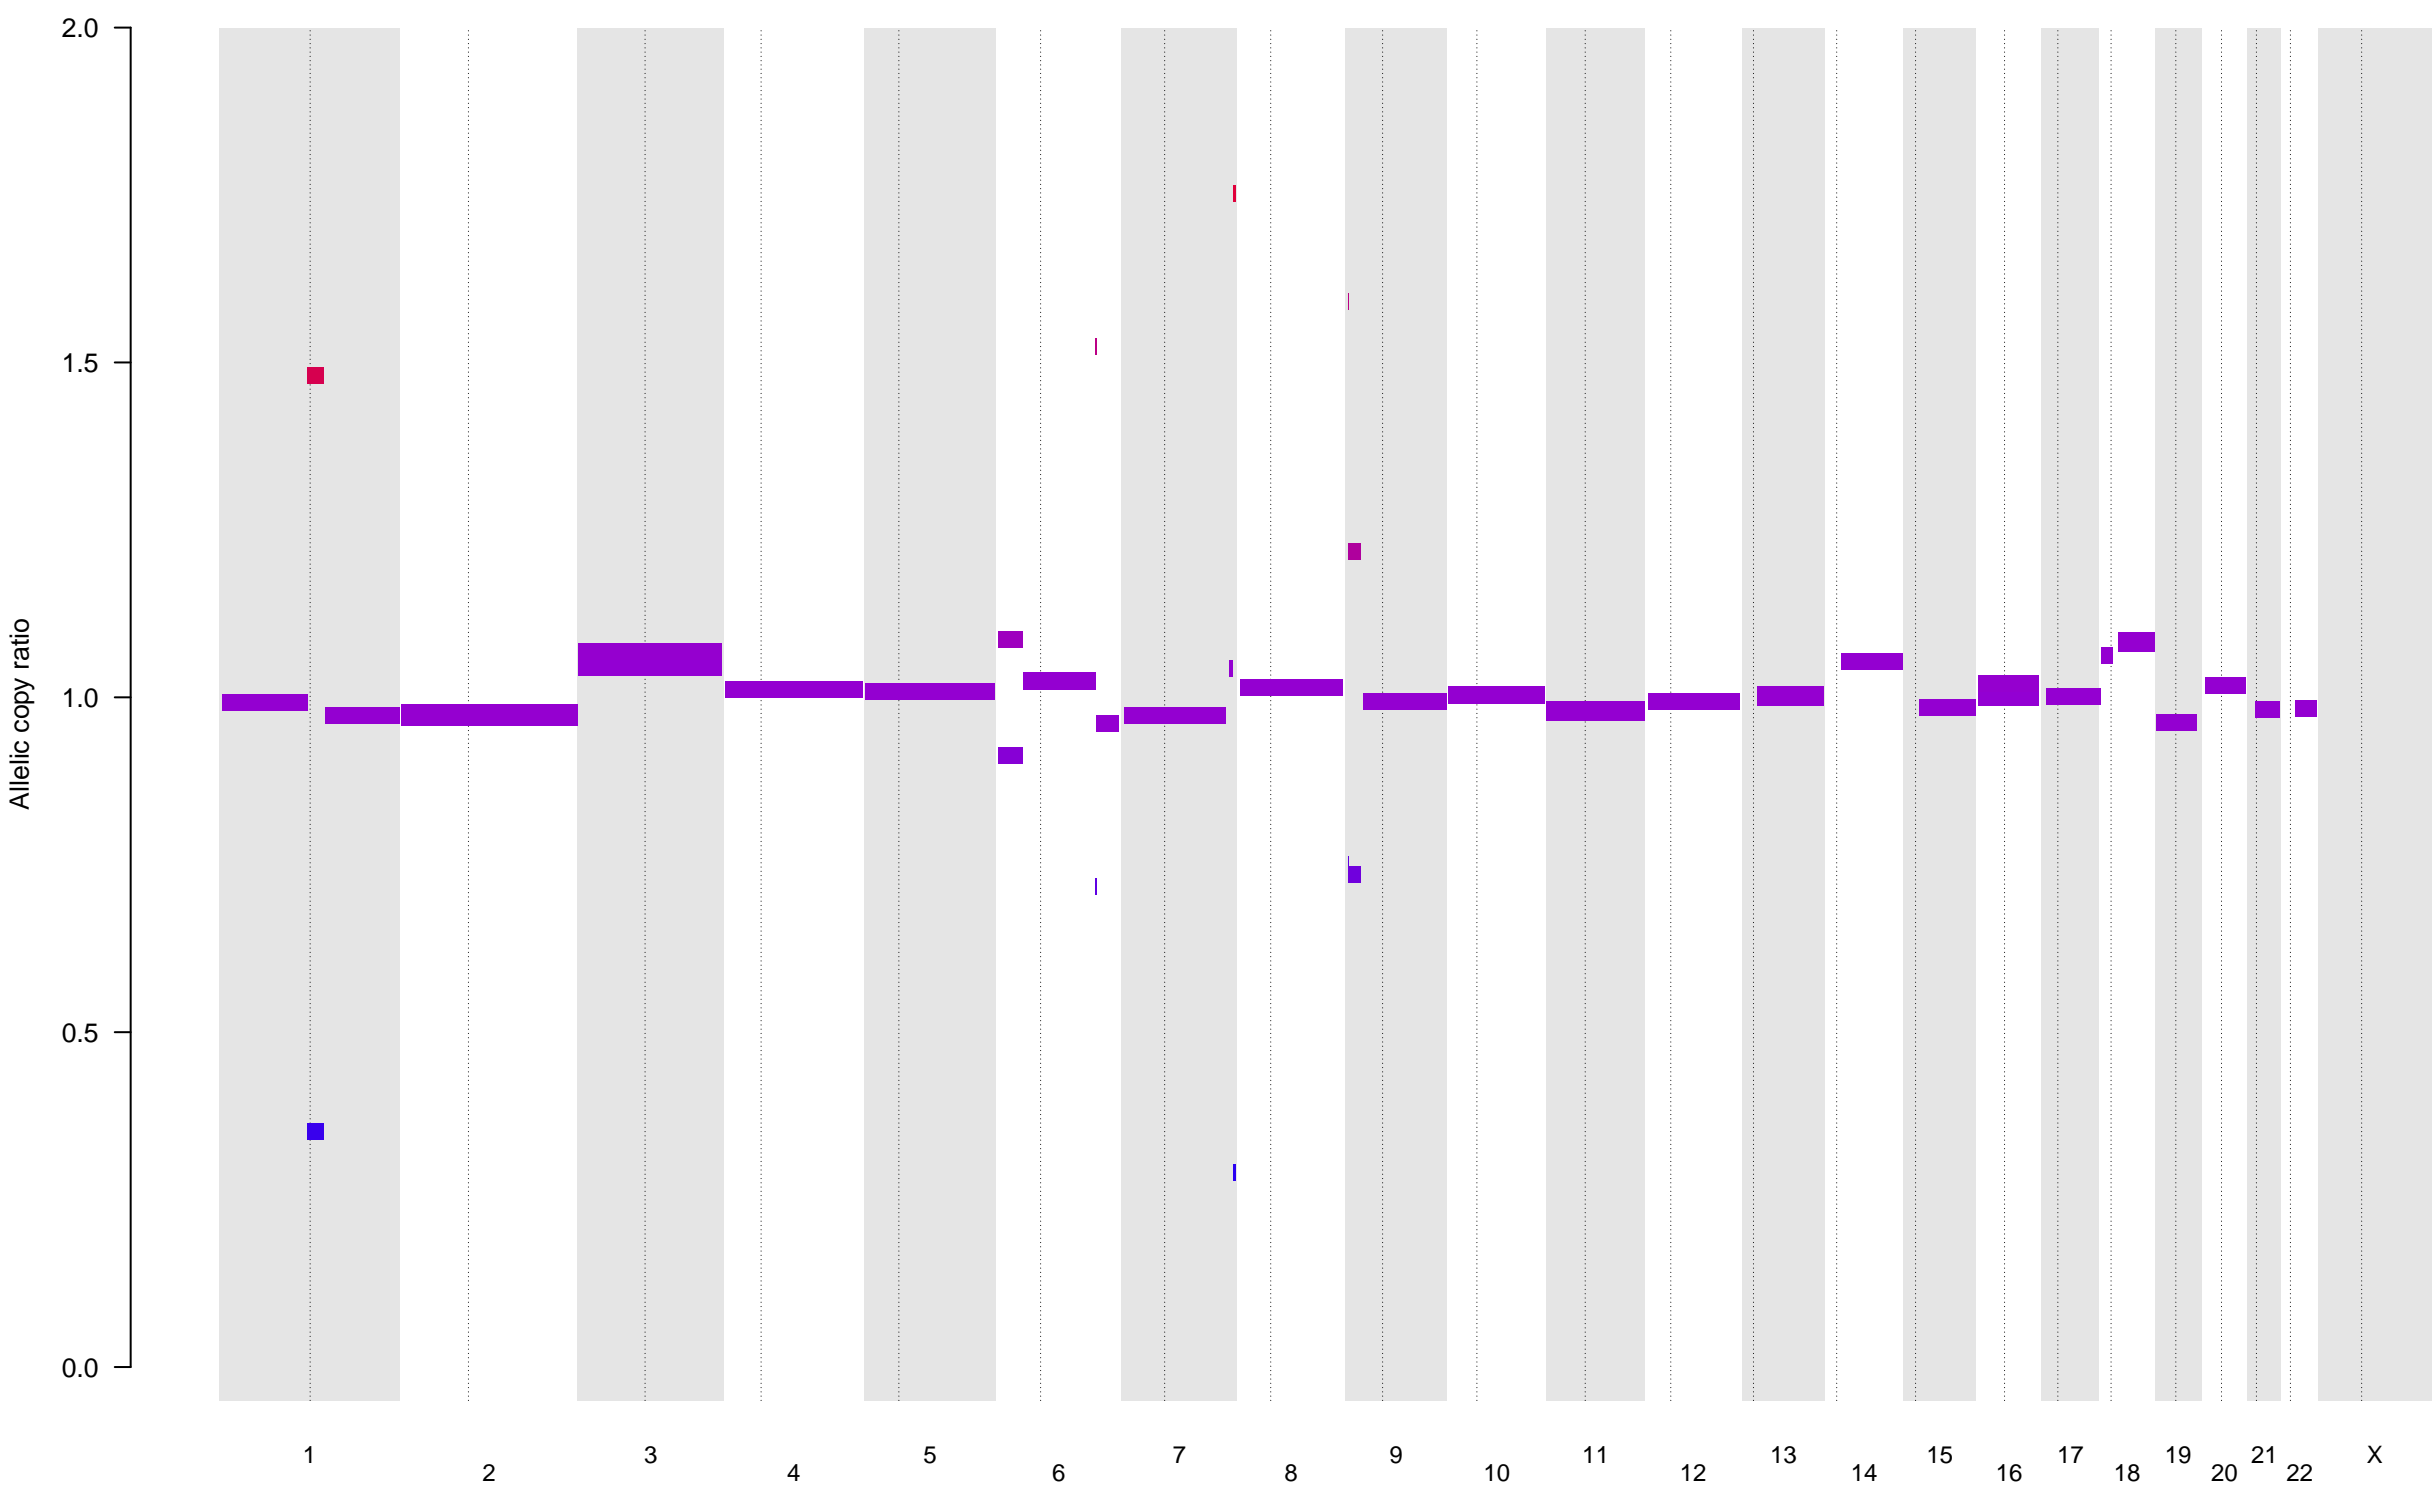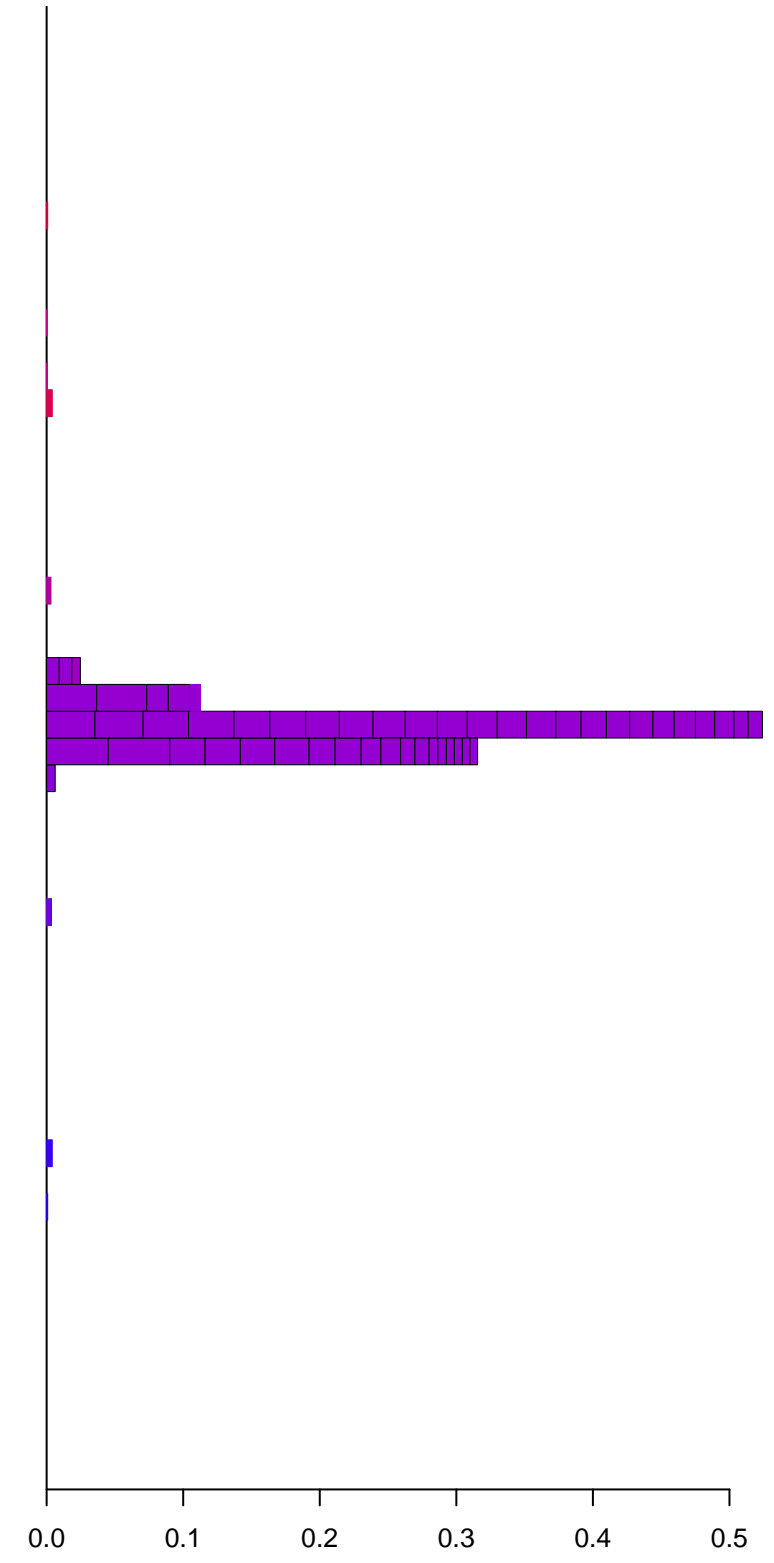

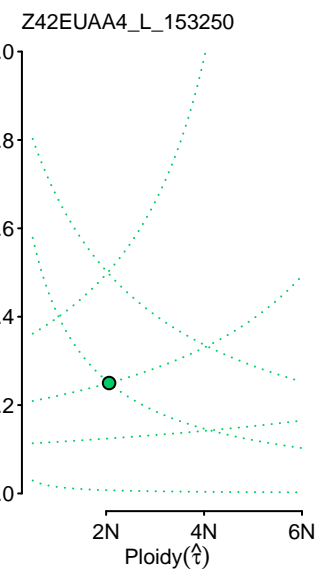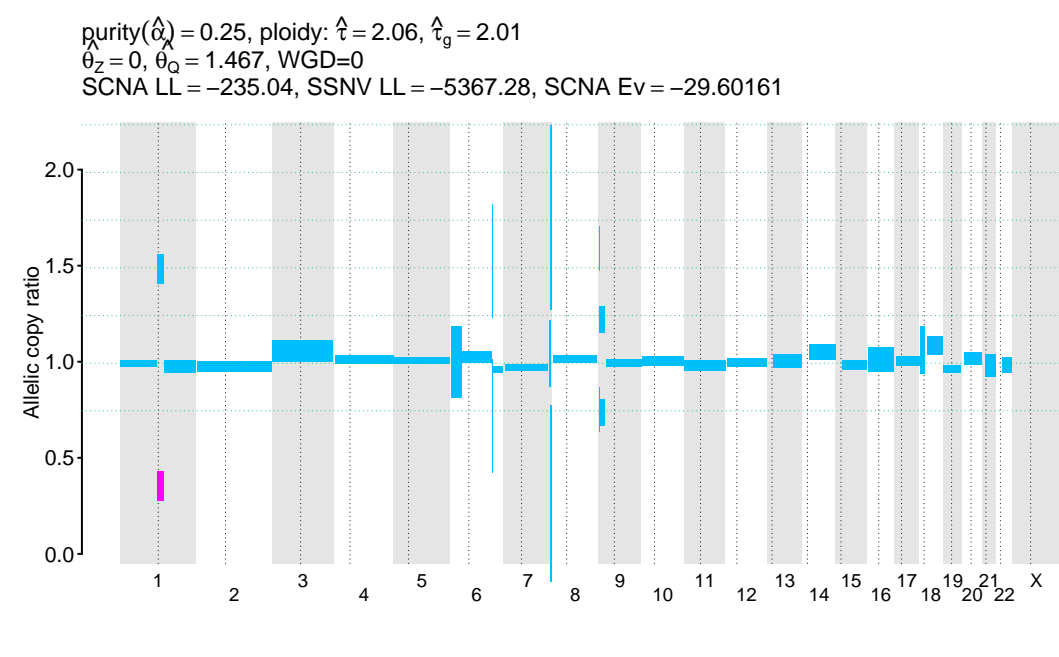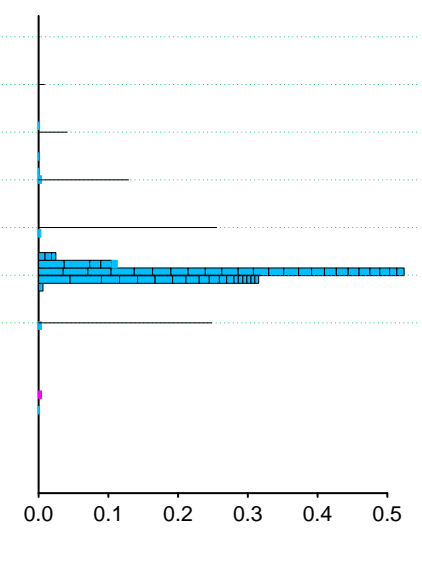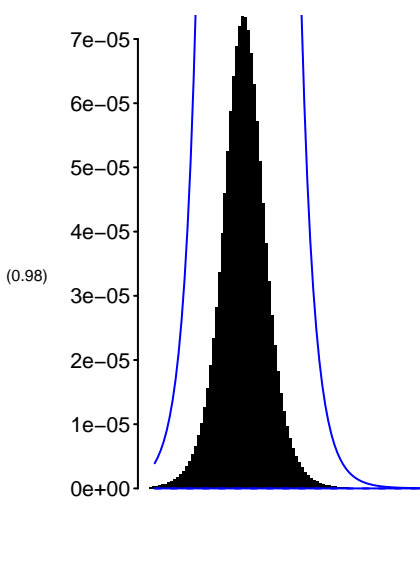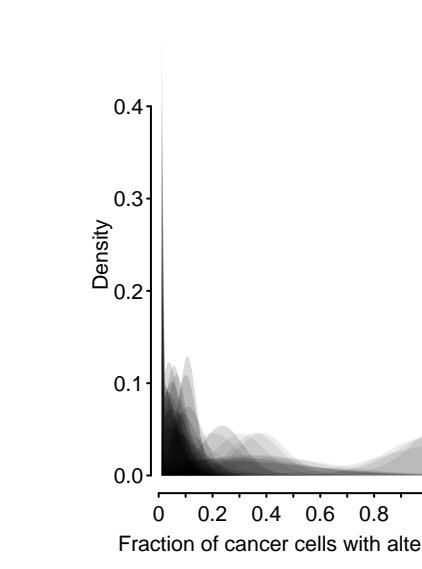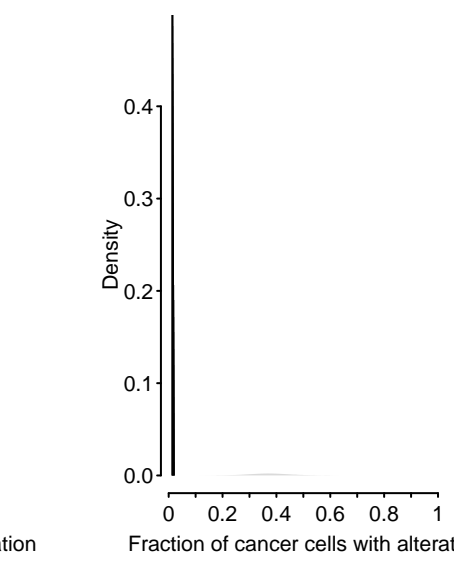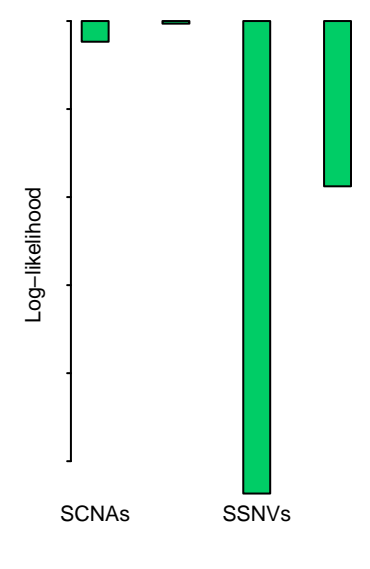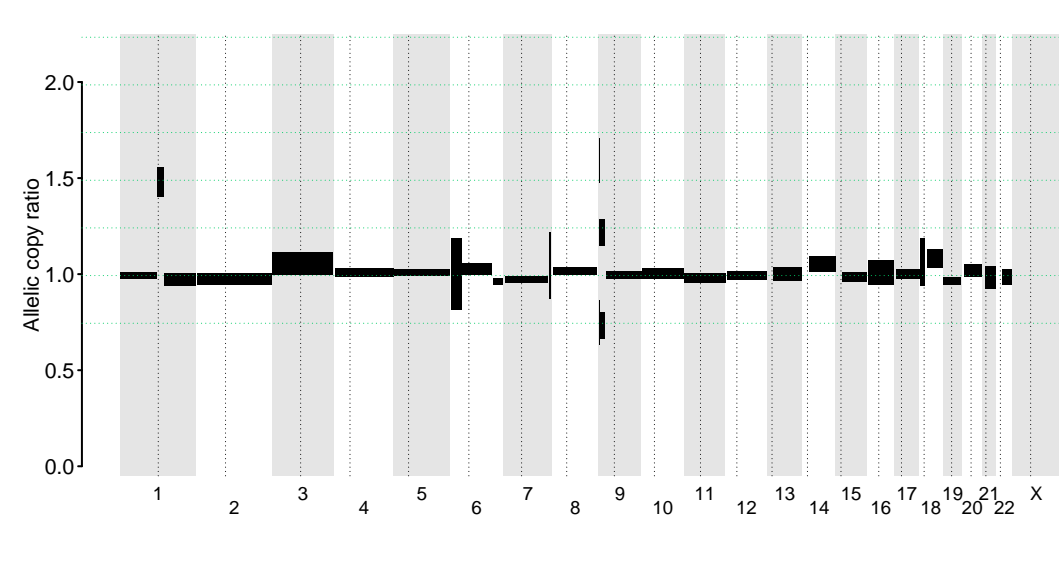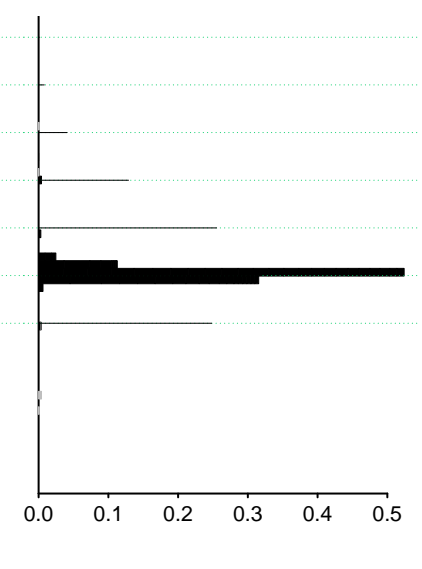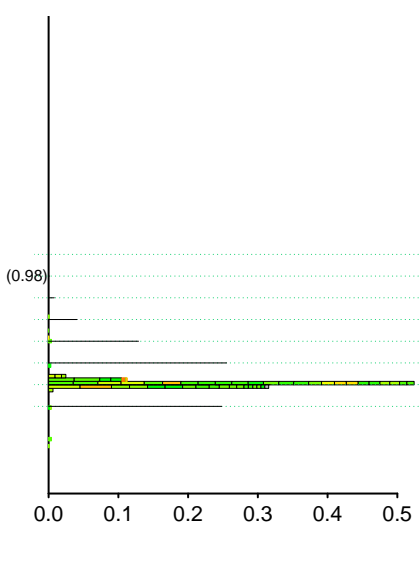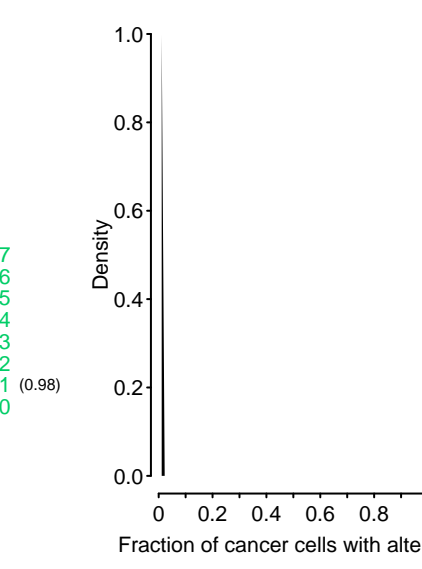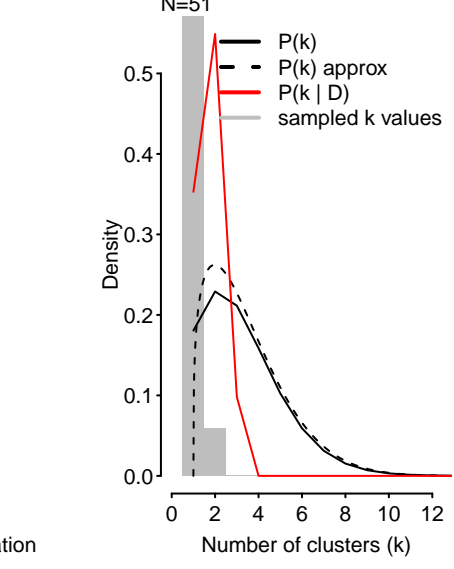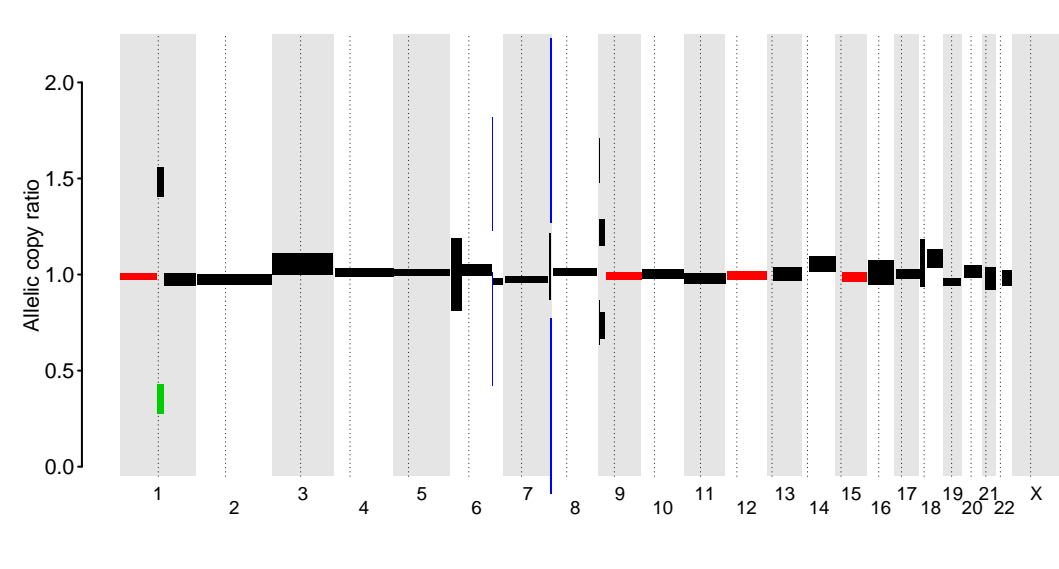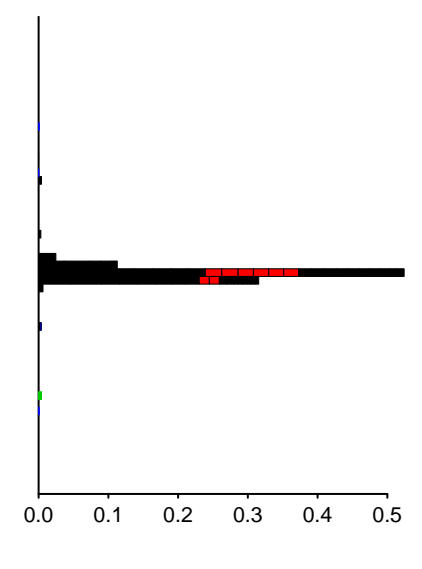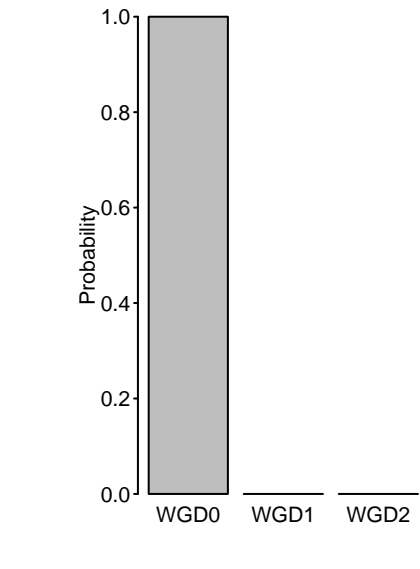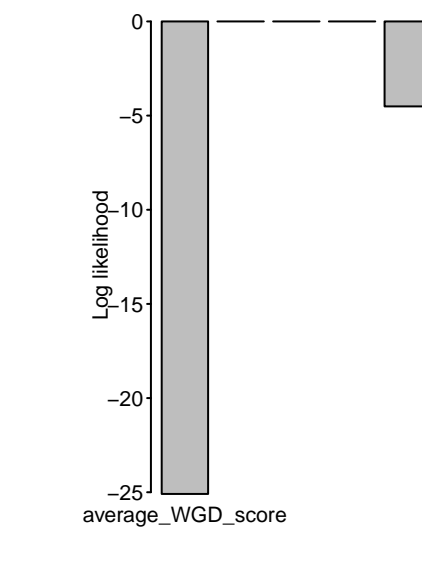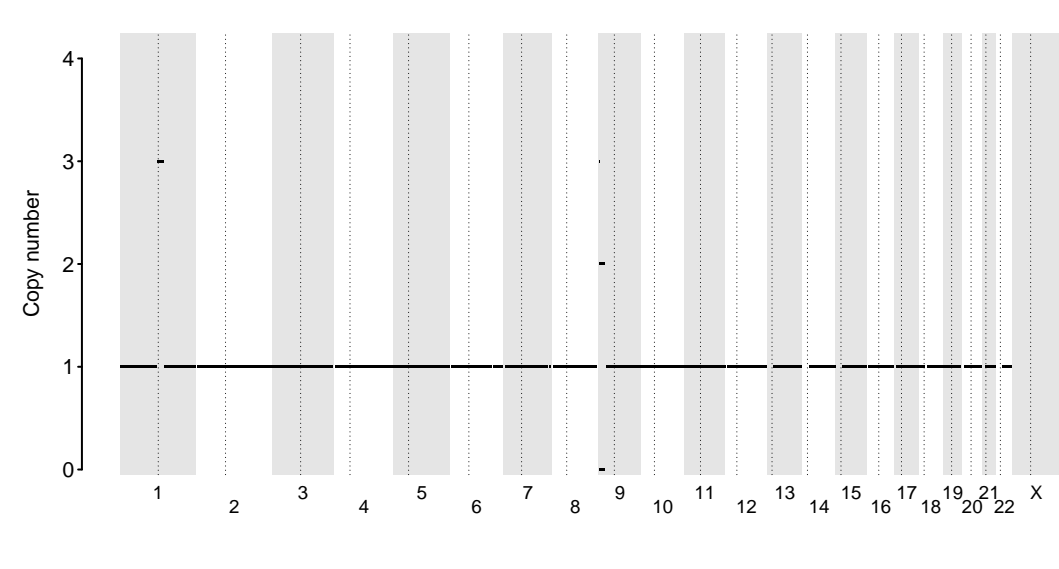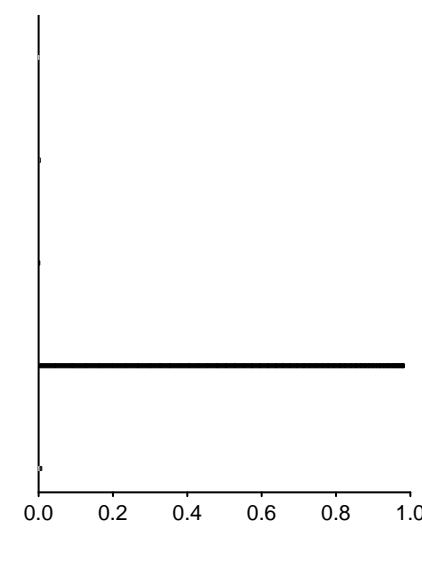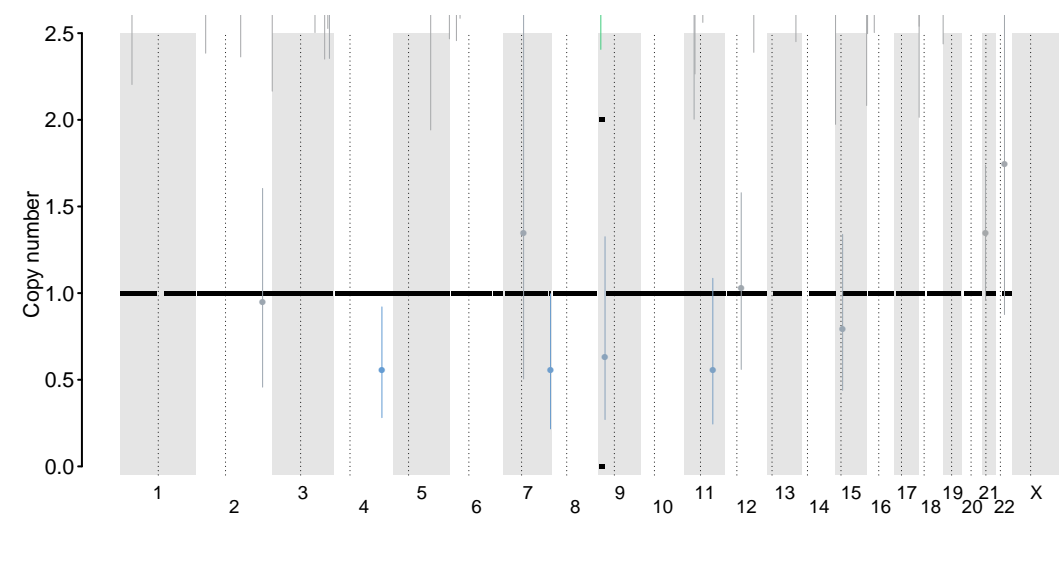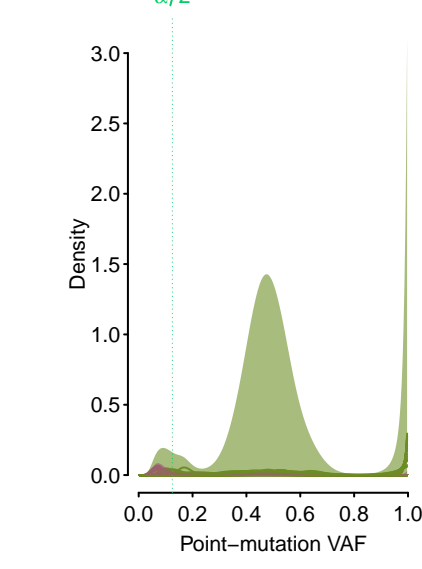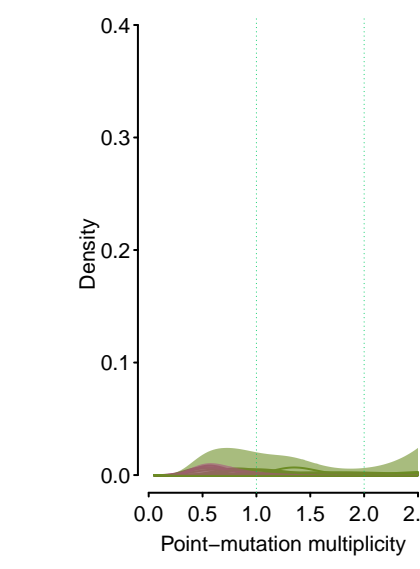



Sample 2

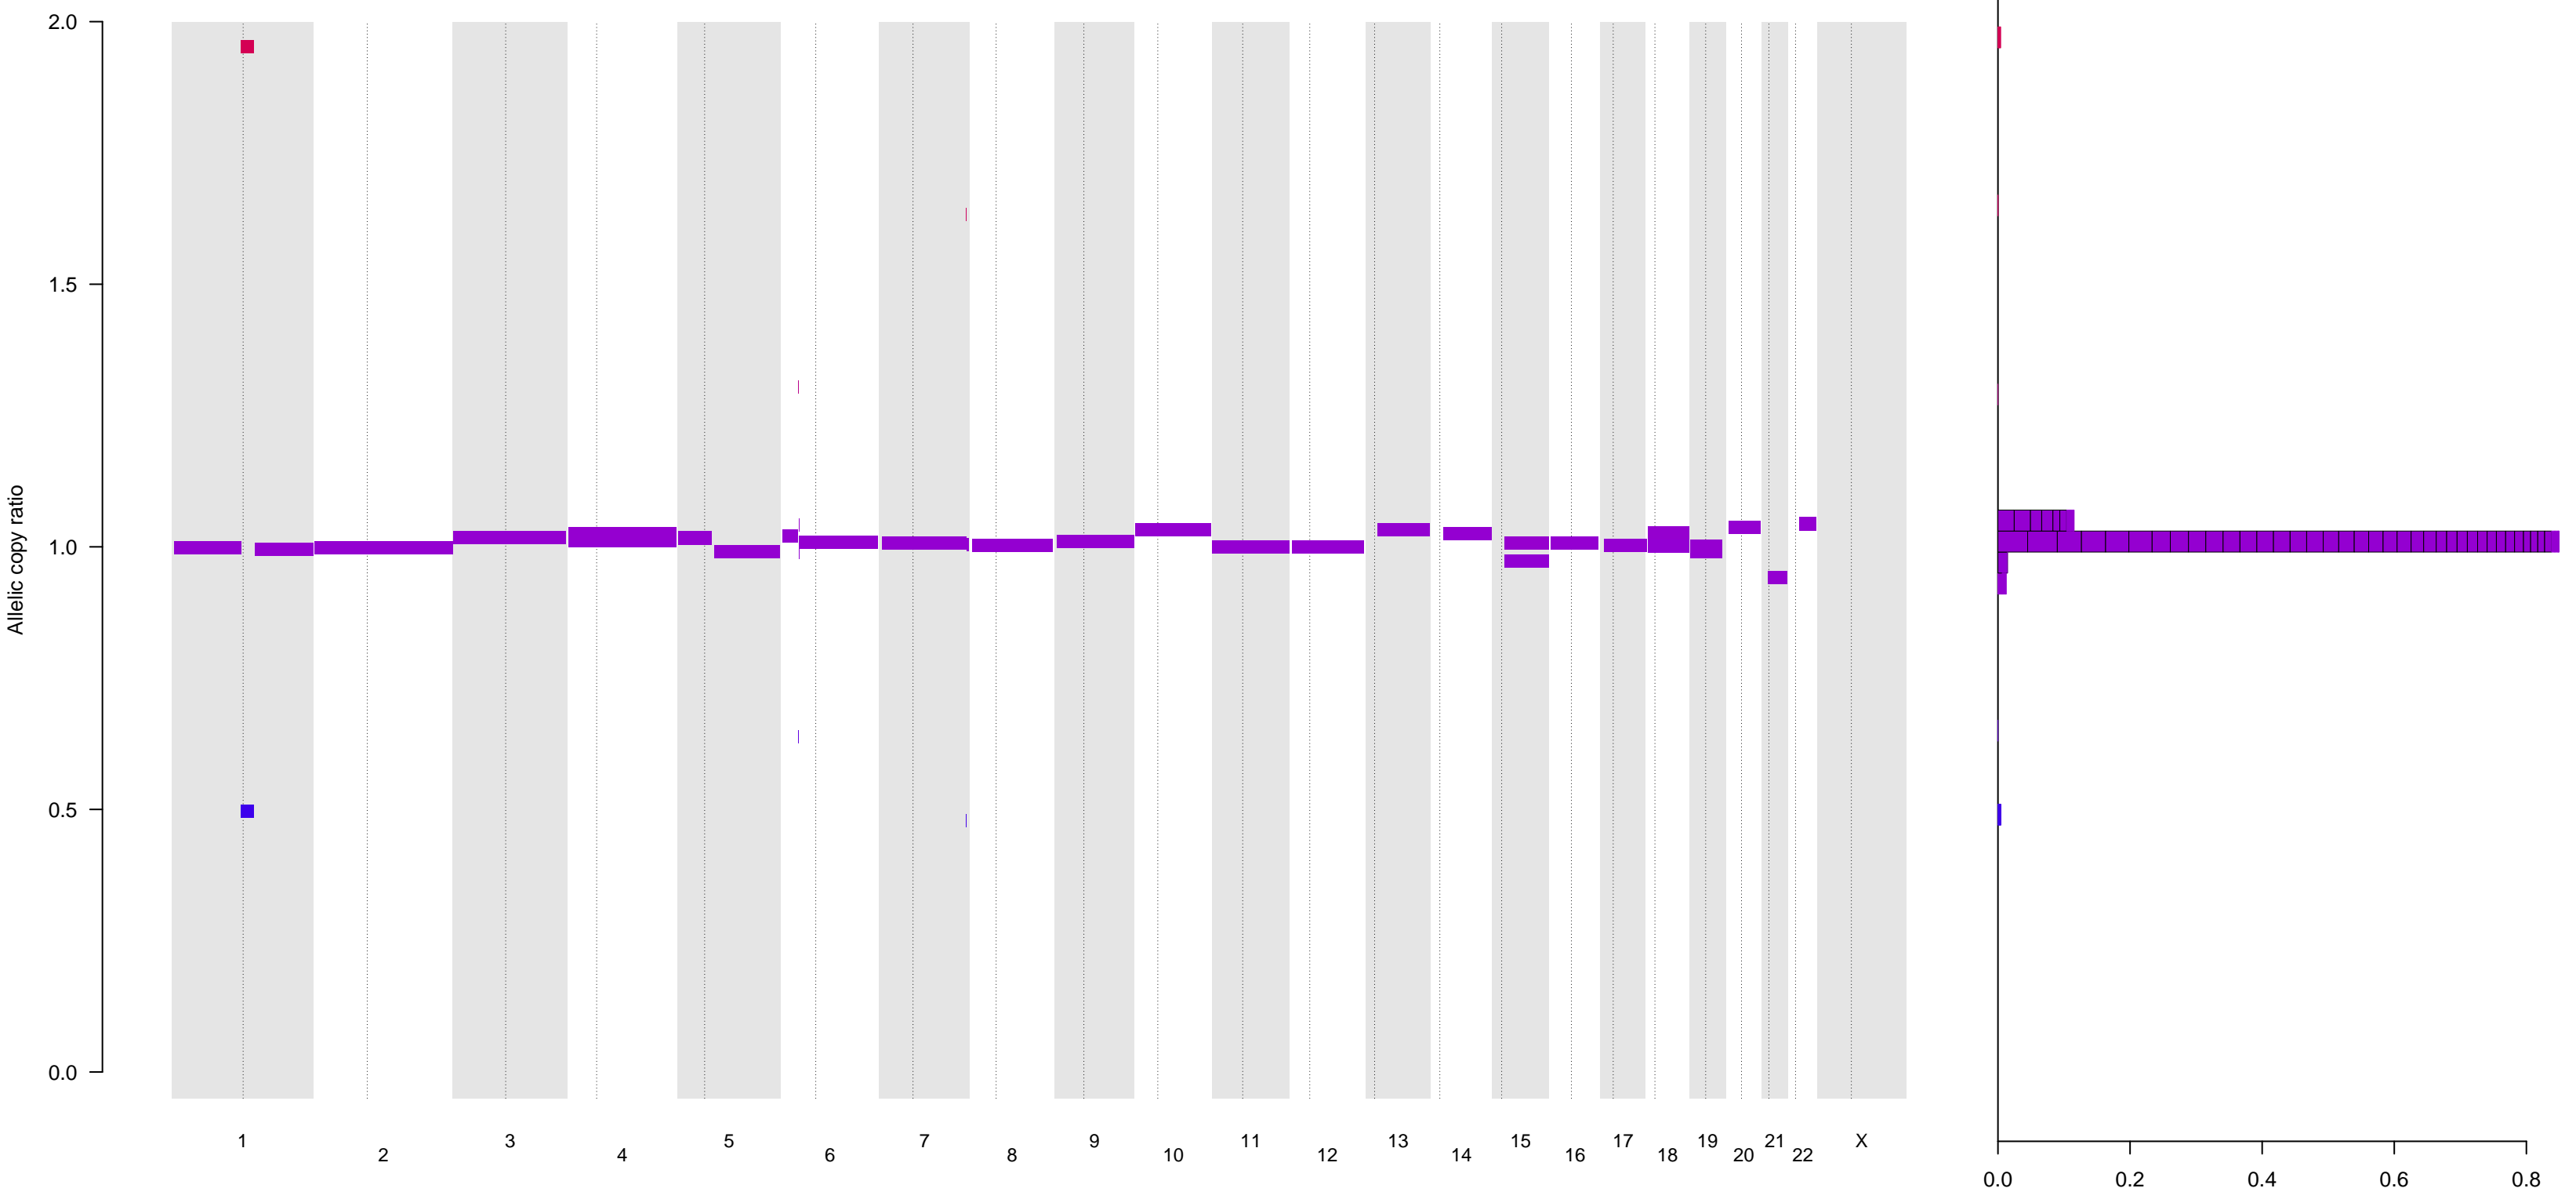

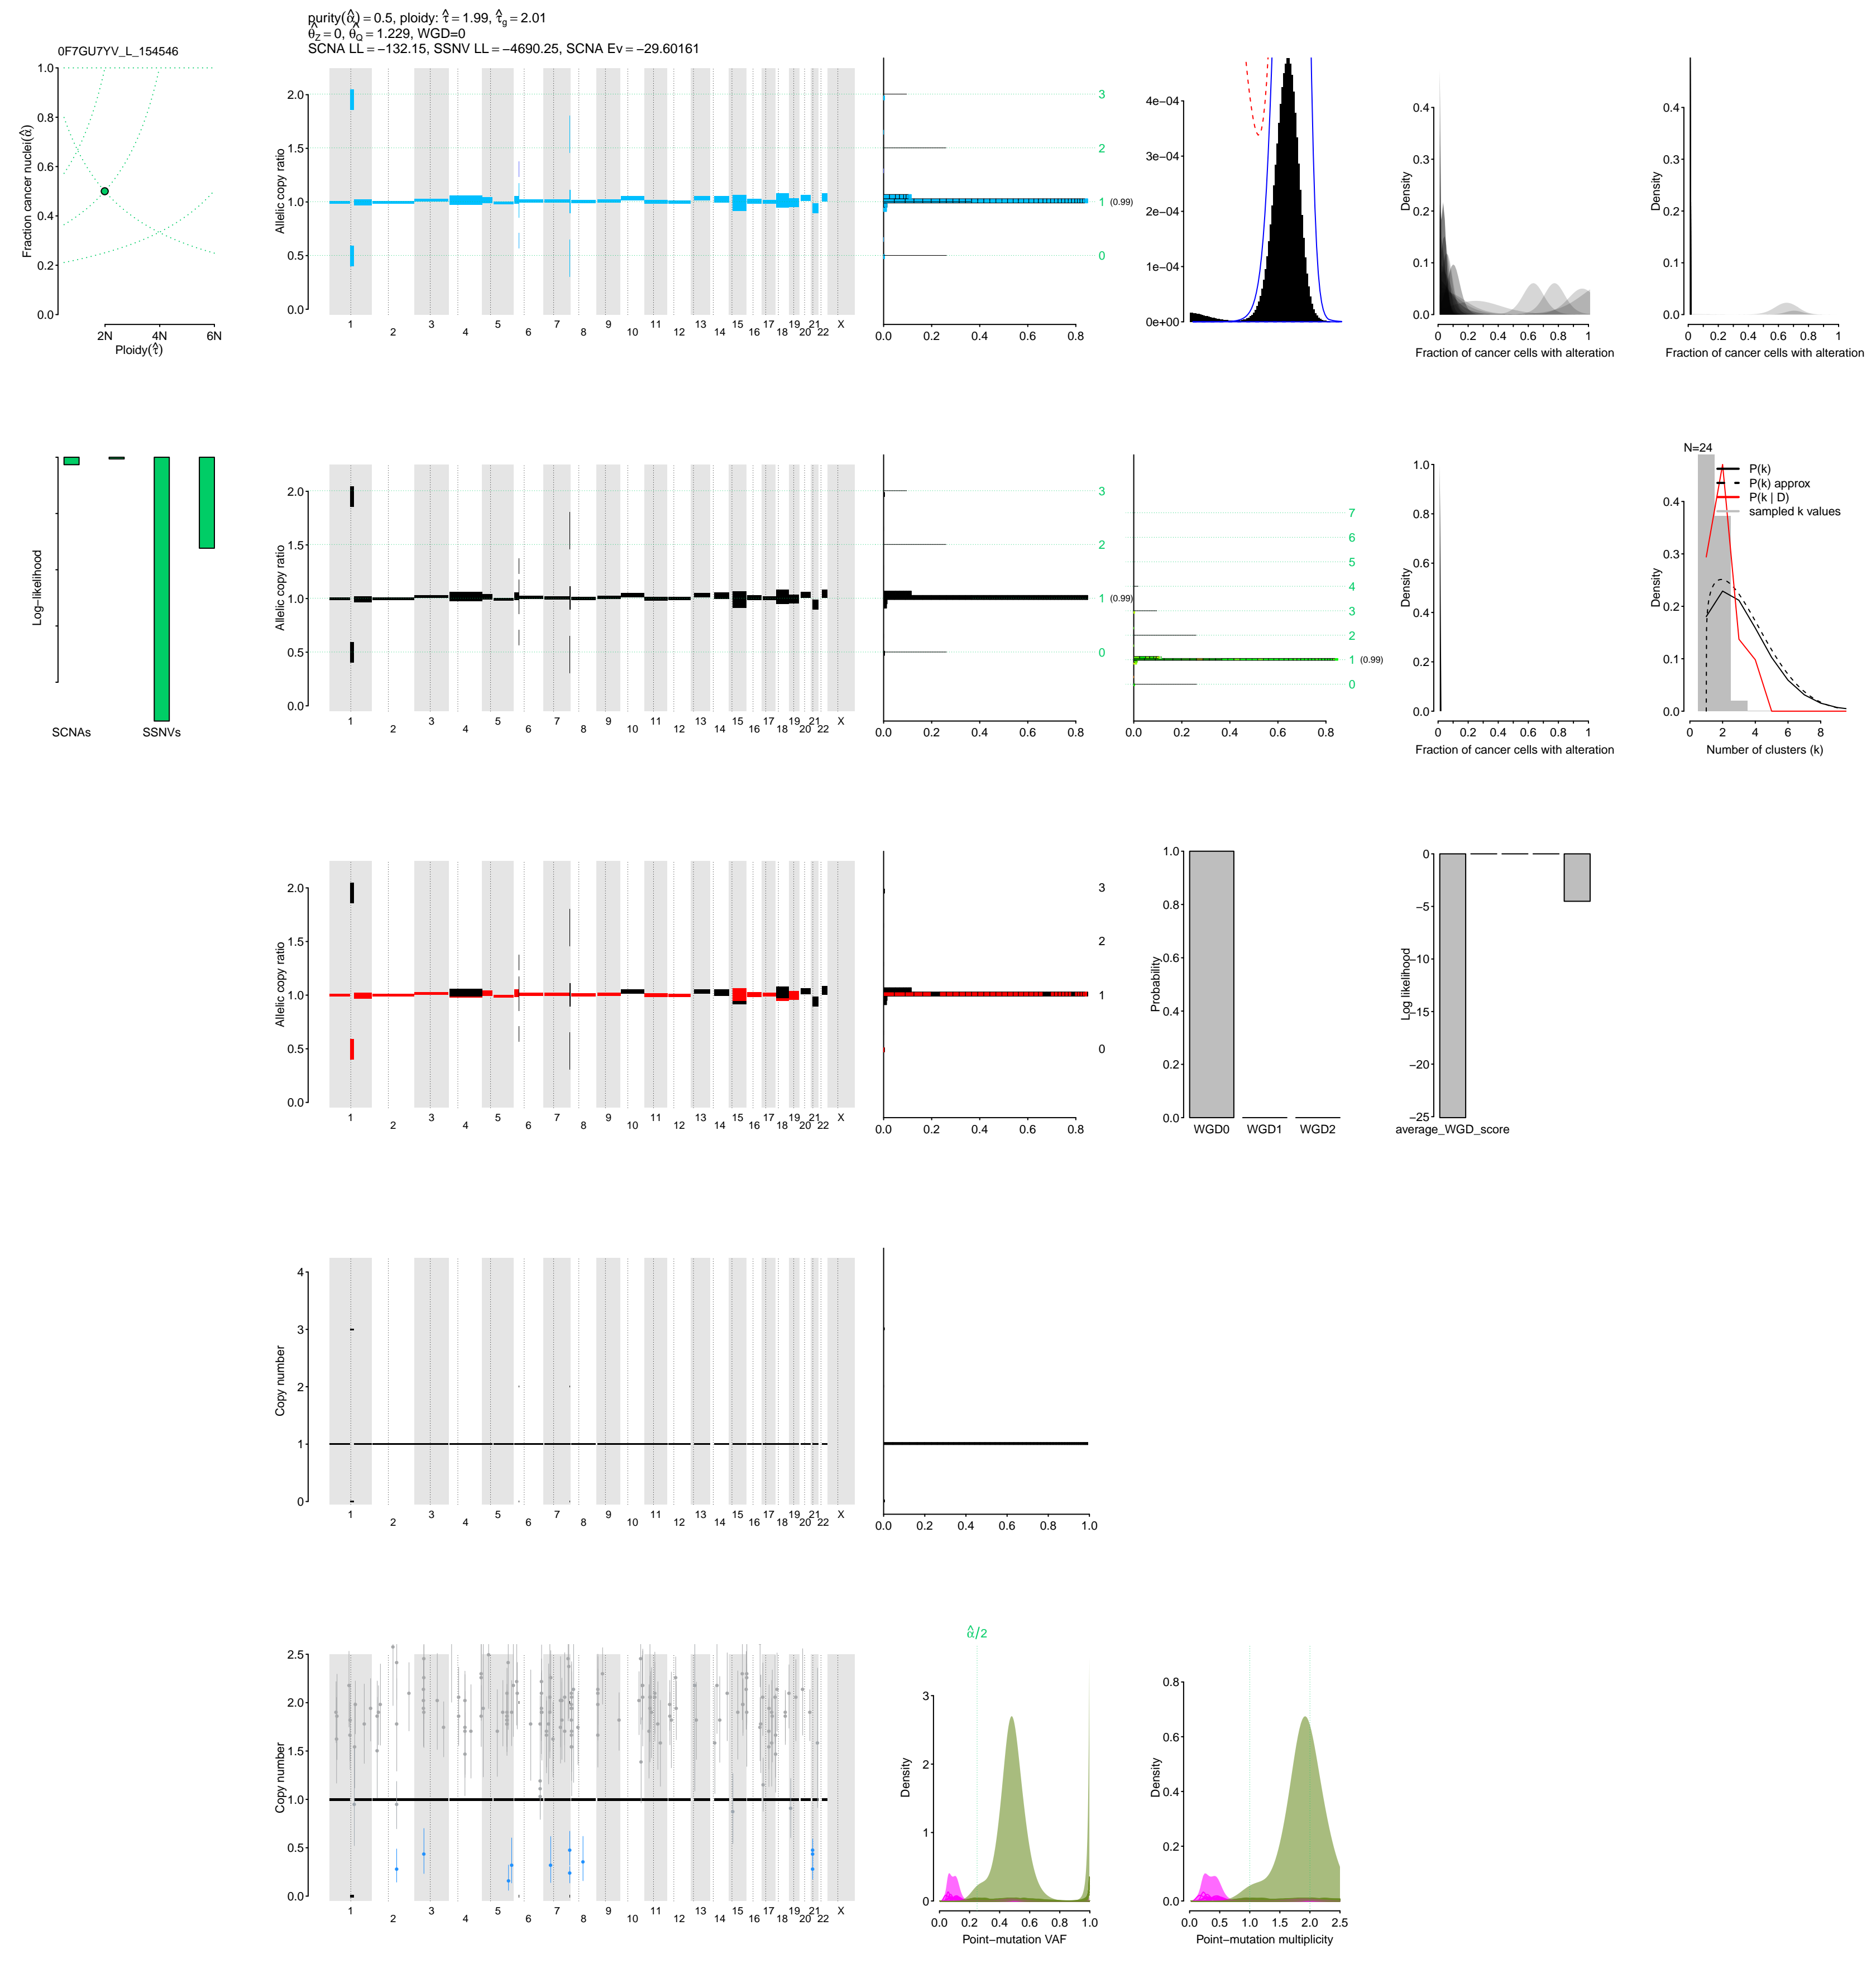

Sample 3

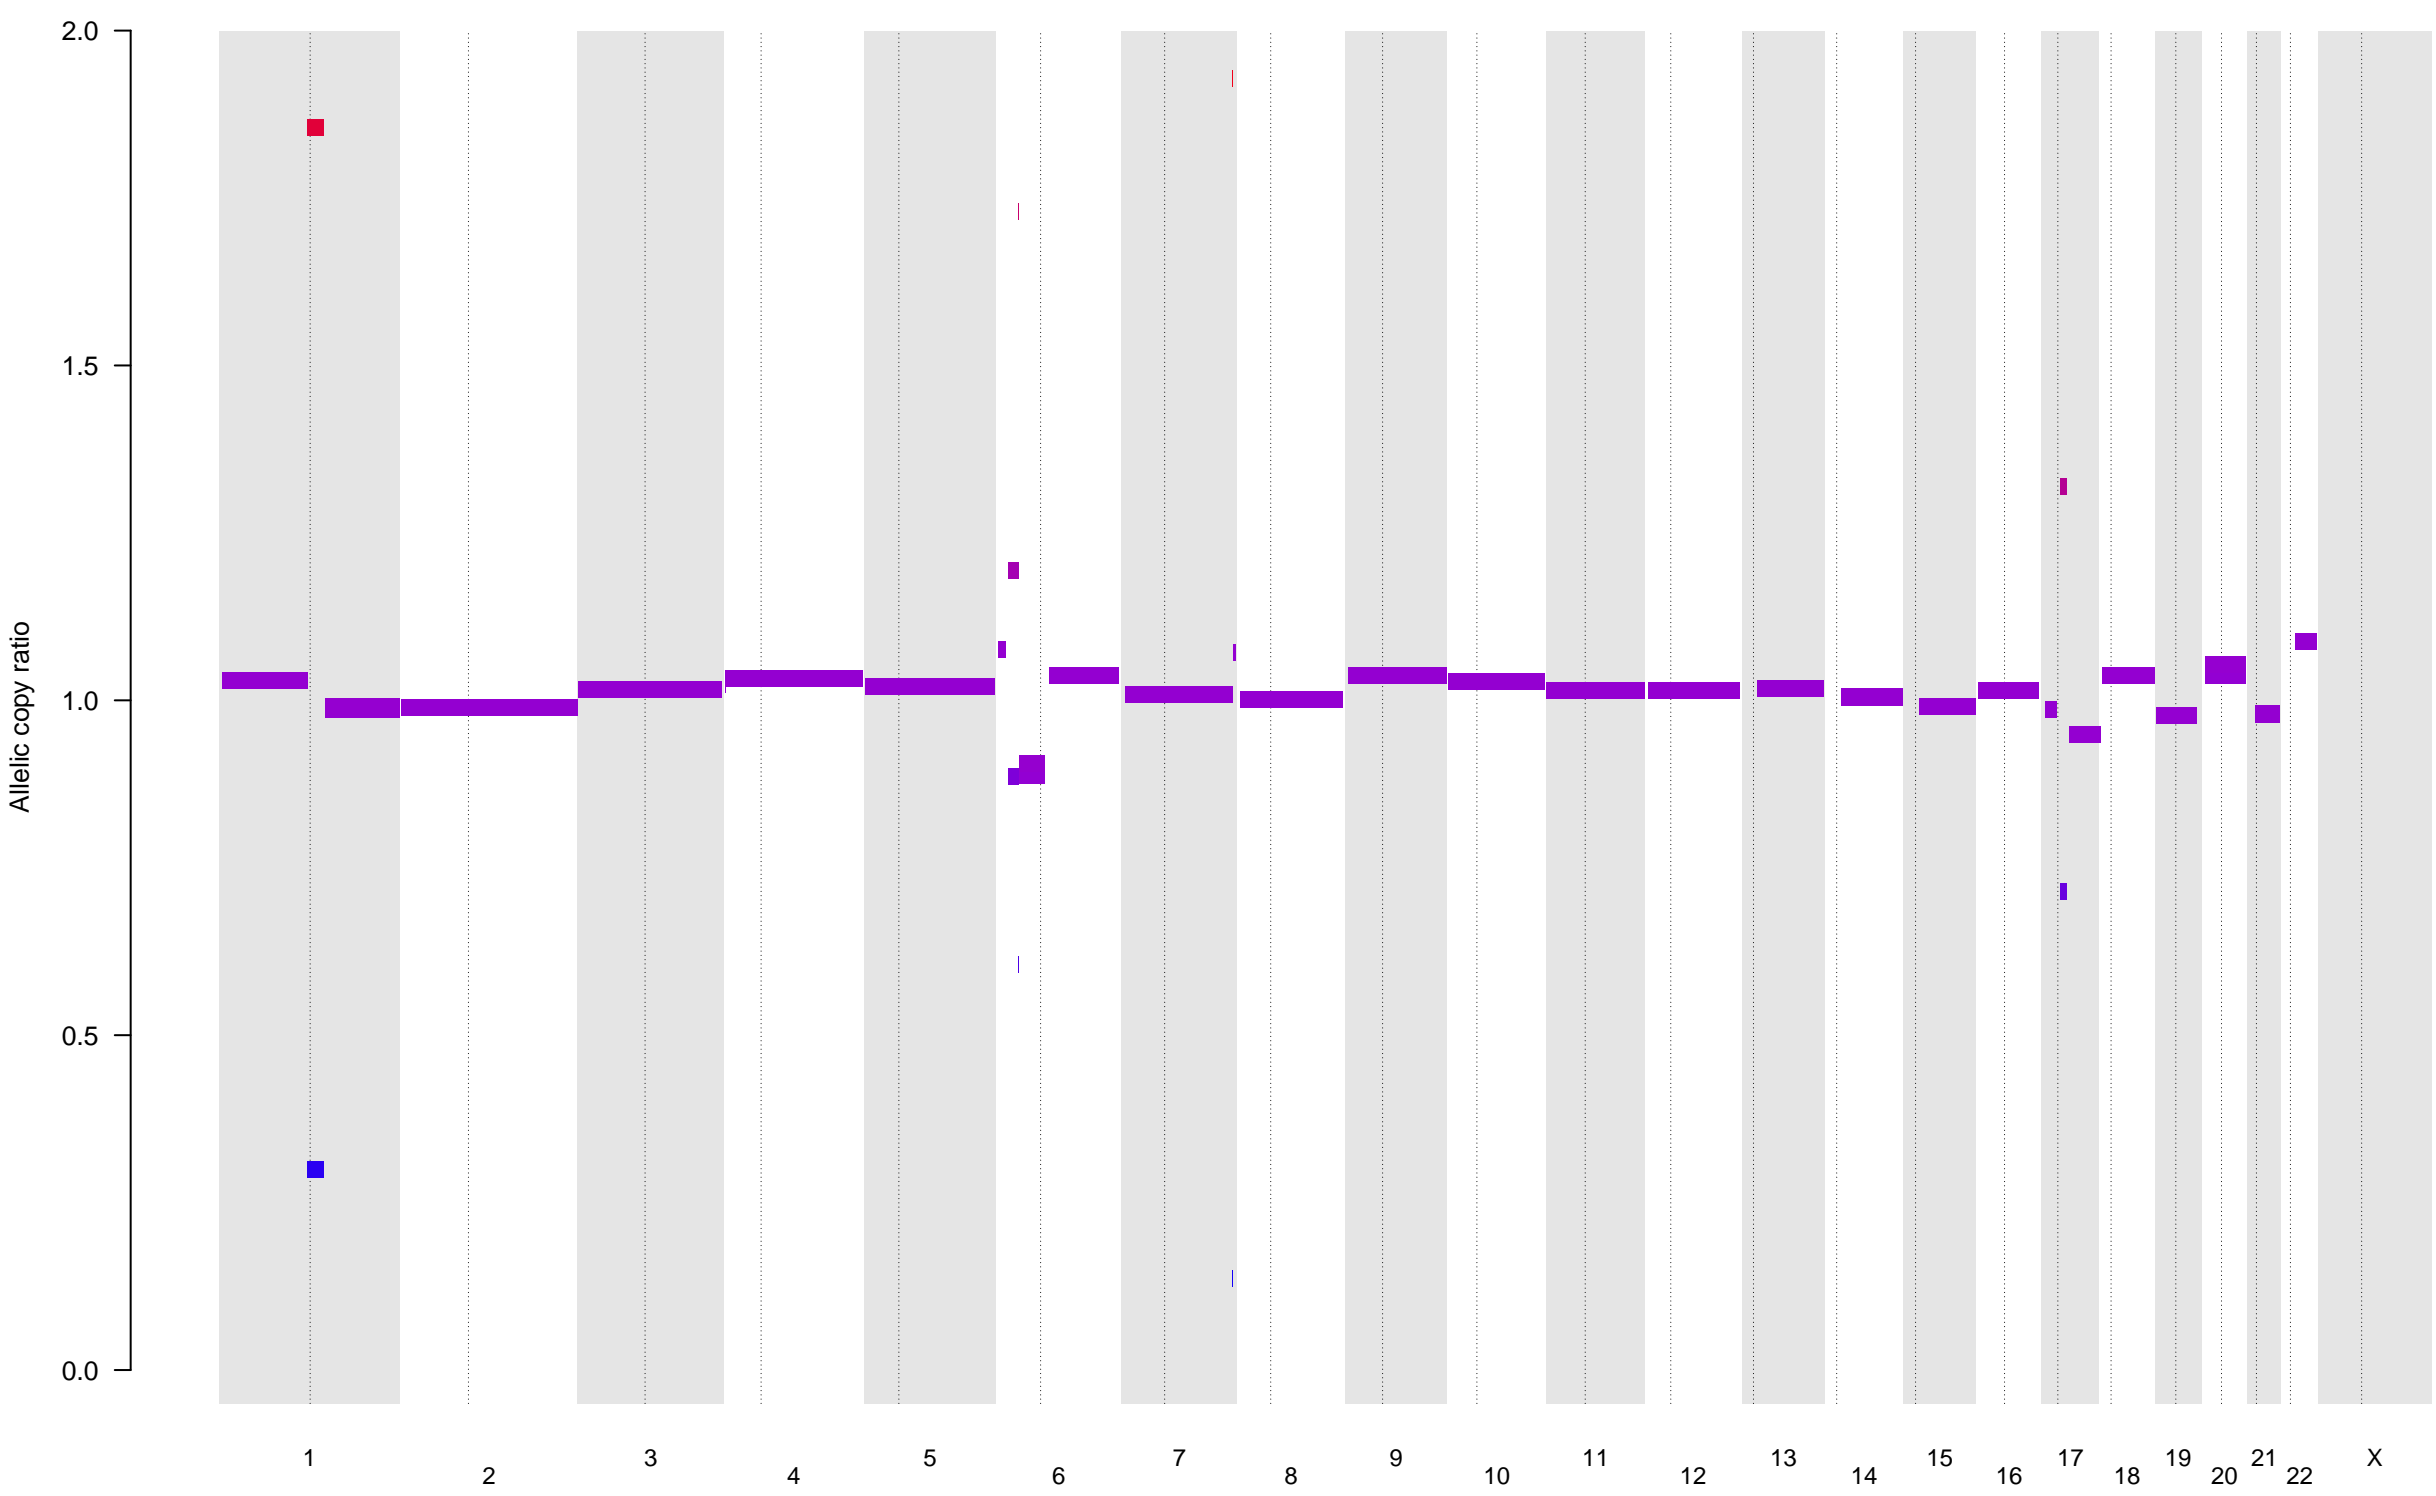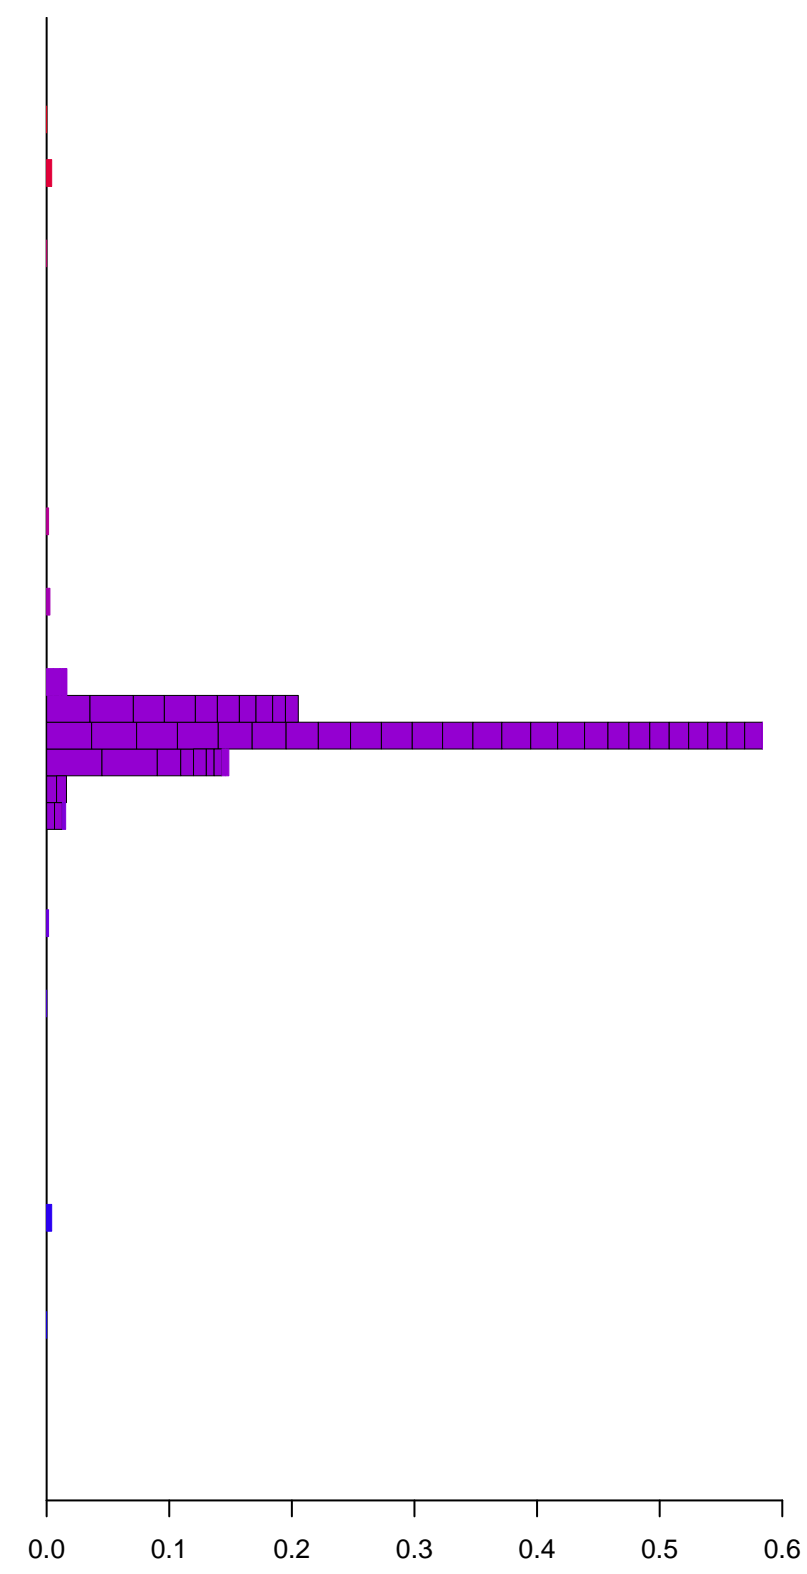

$\text{purity}(\hat{\alpha}) = 0.15$ , ploidy:  $\hat{t} = 1.73$ ,  $\hat{t}_g = 2.01$   
 $\theta_z = 0.03$ ,  $\theta_a = 1.941$ , WGD=0  
 SCNA LL = -271.29, SSNV LL = -10550, SCNA Ev = -46.8262

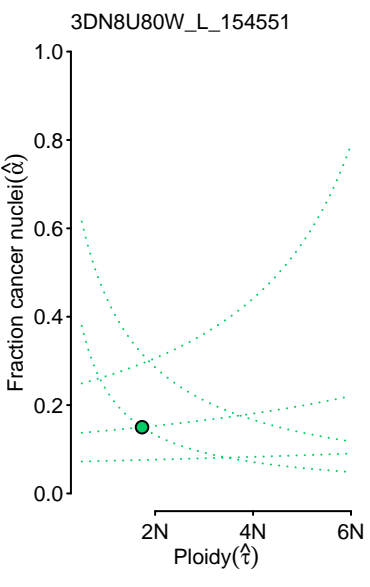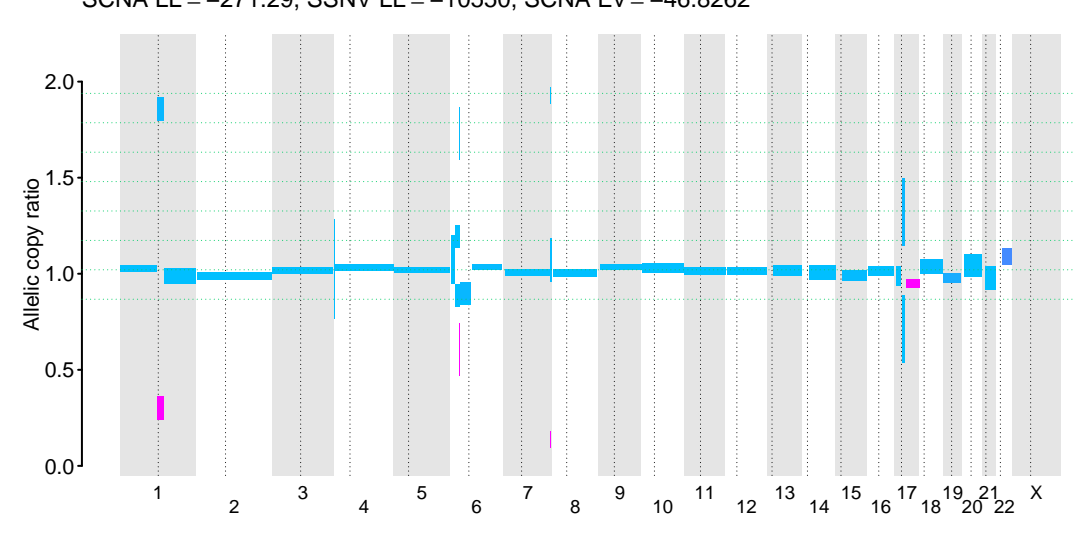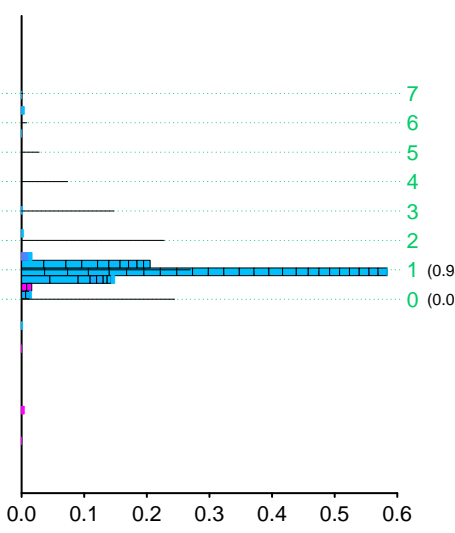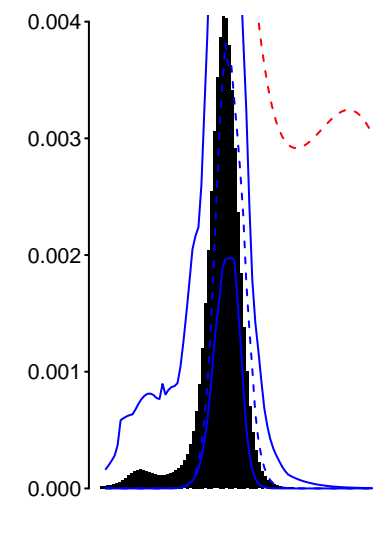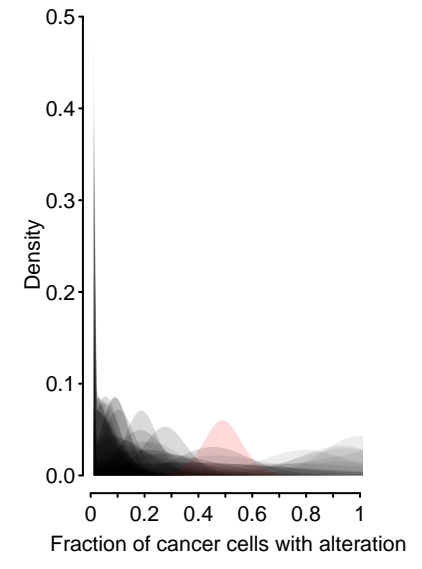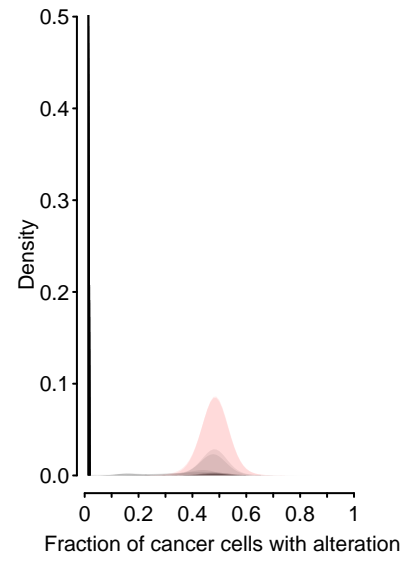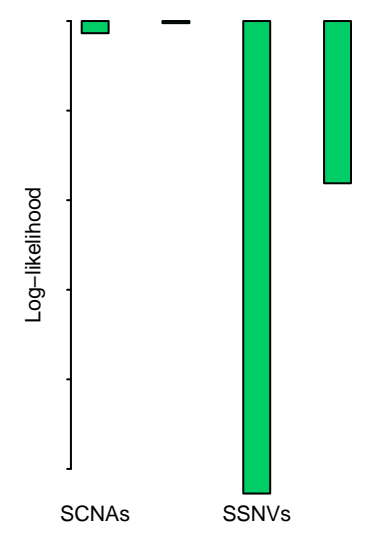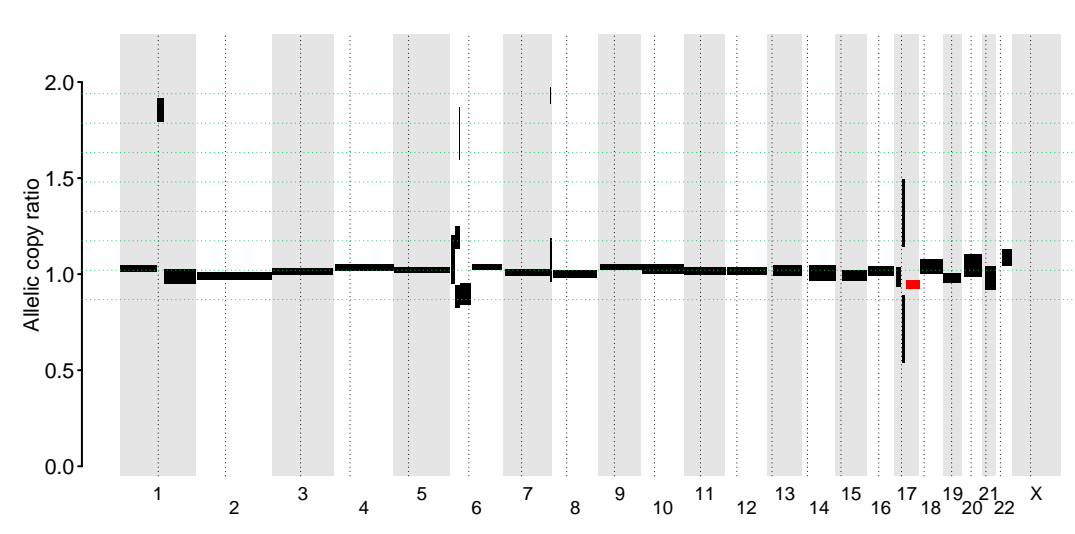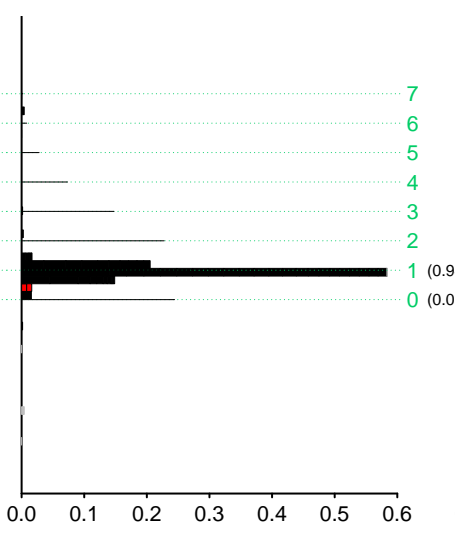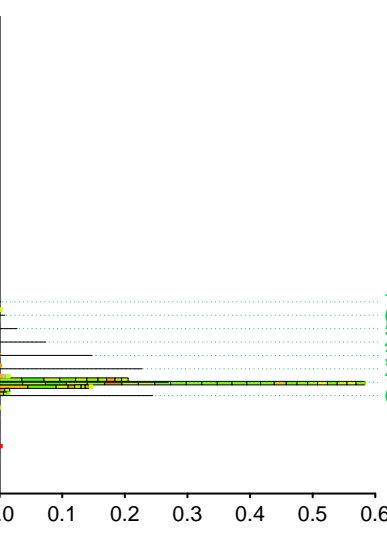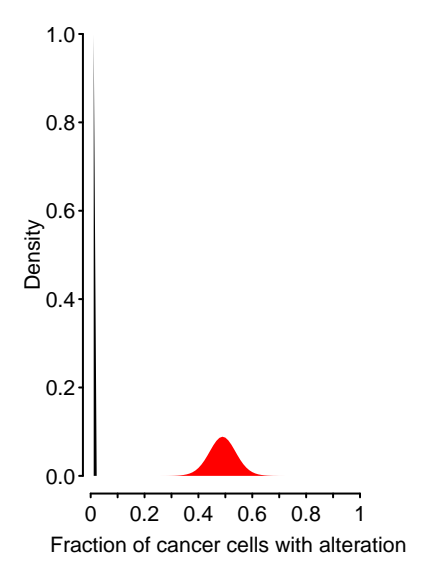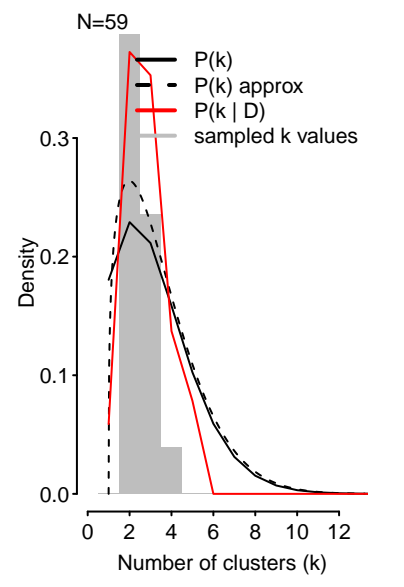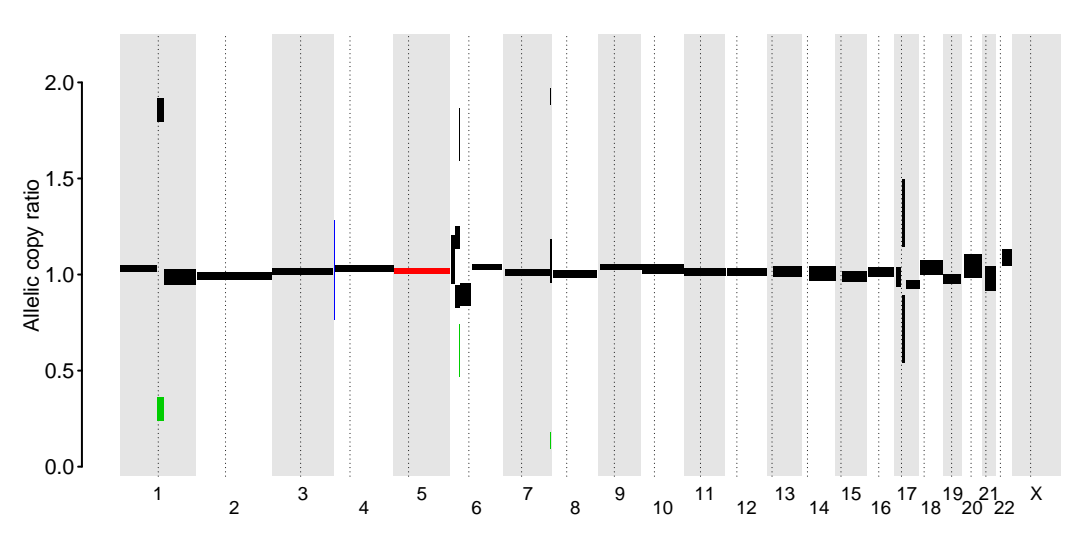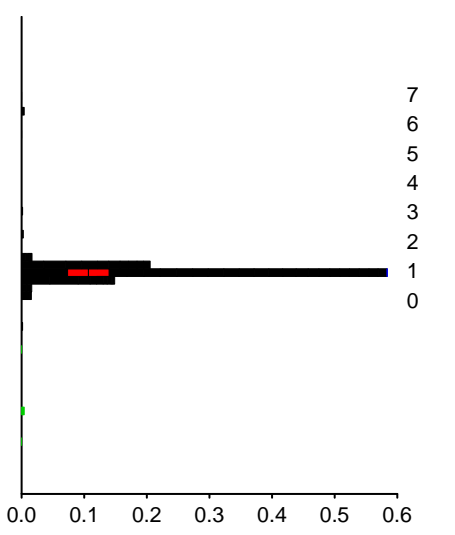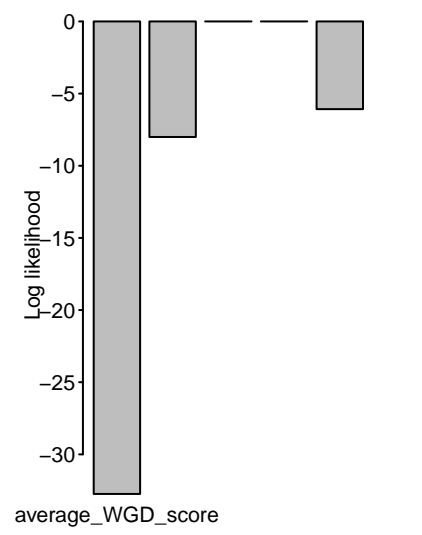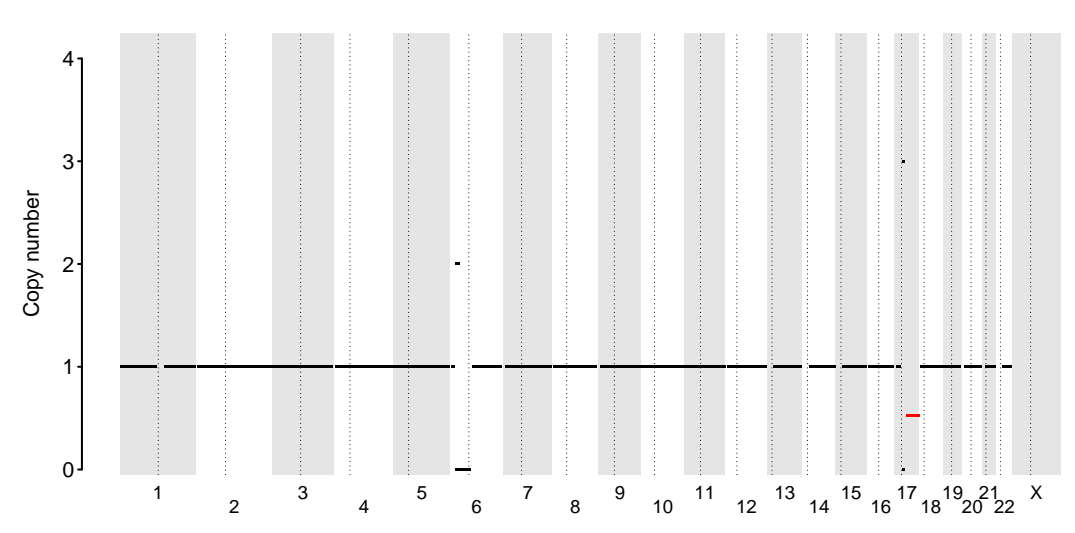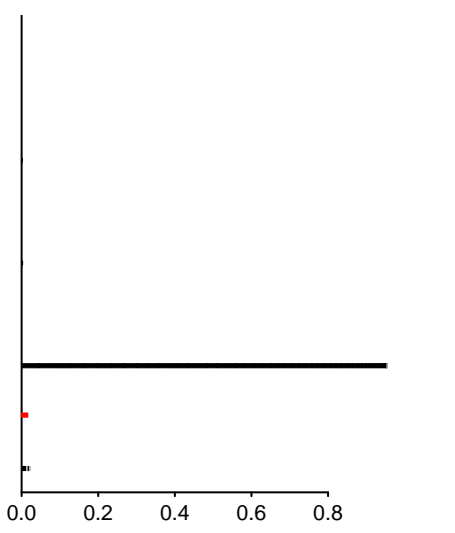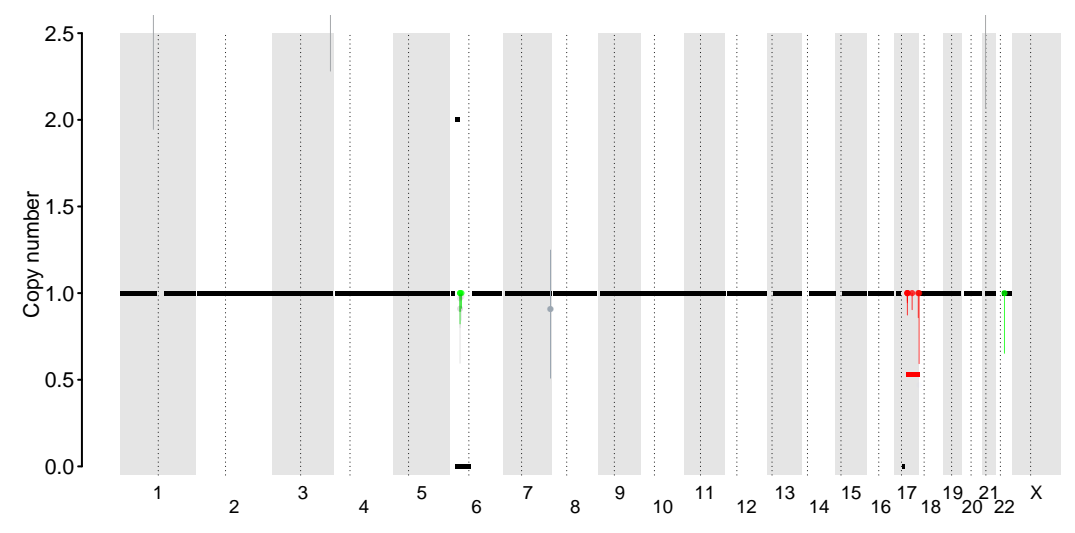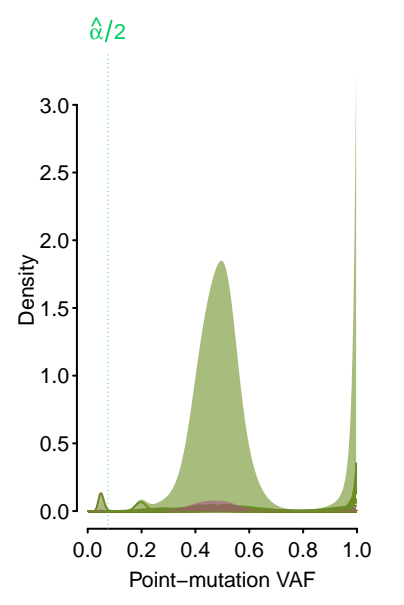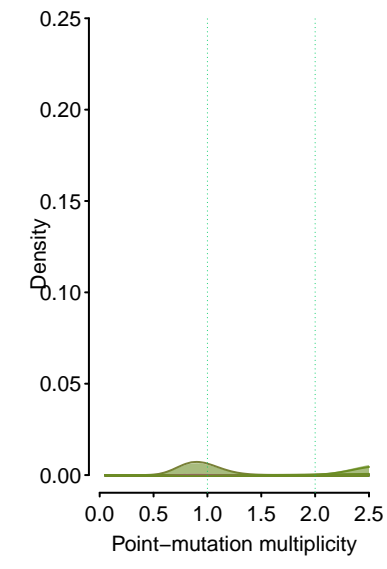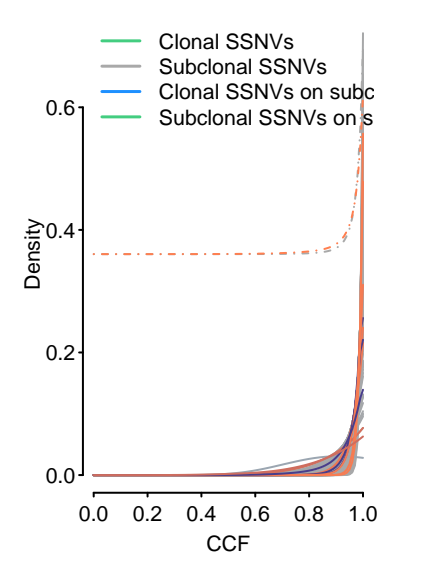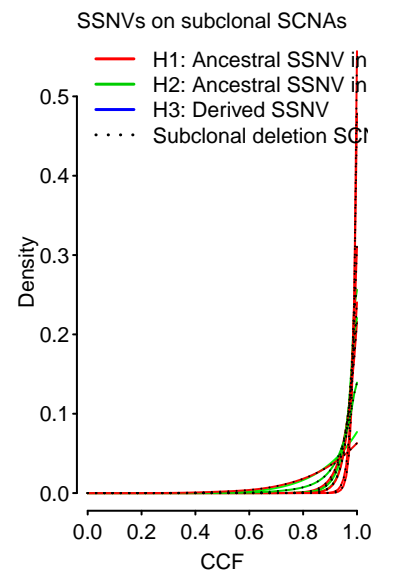

Sample 4

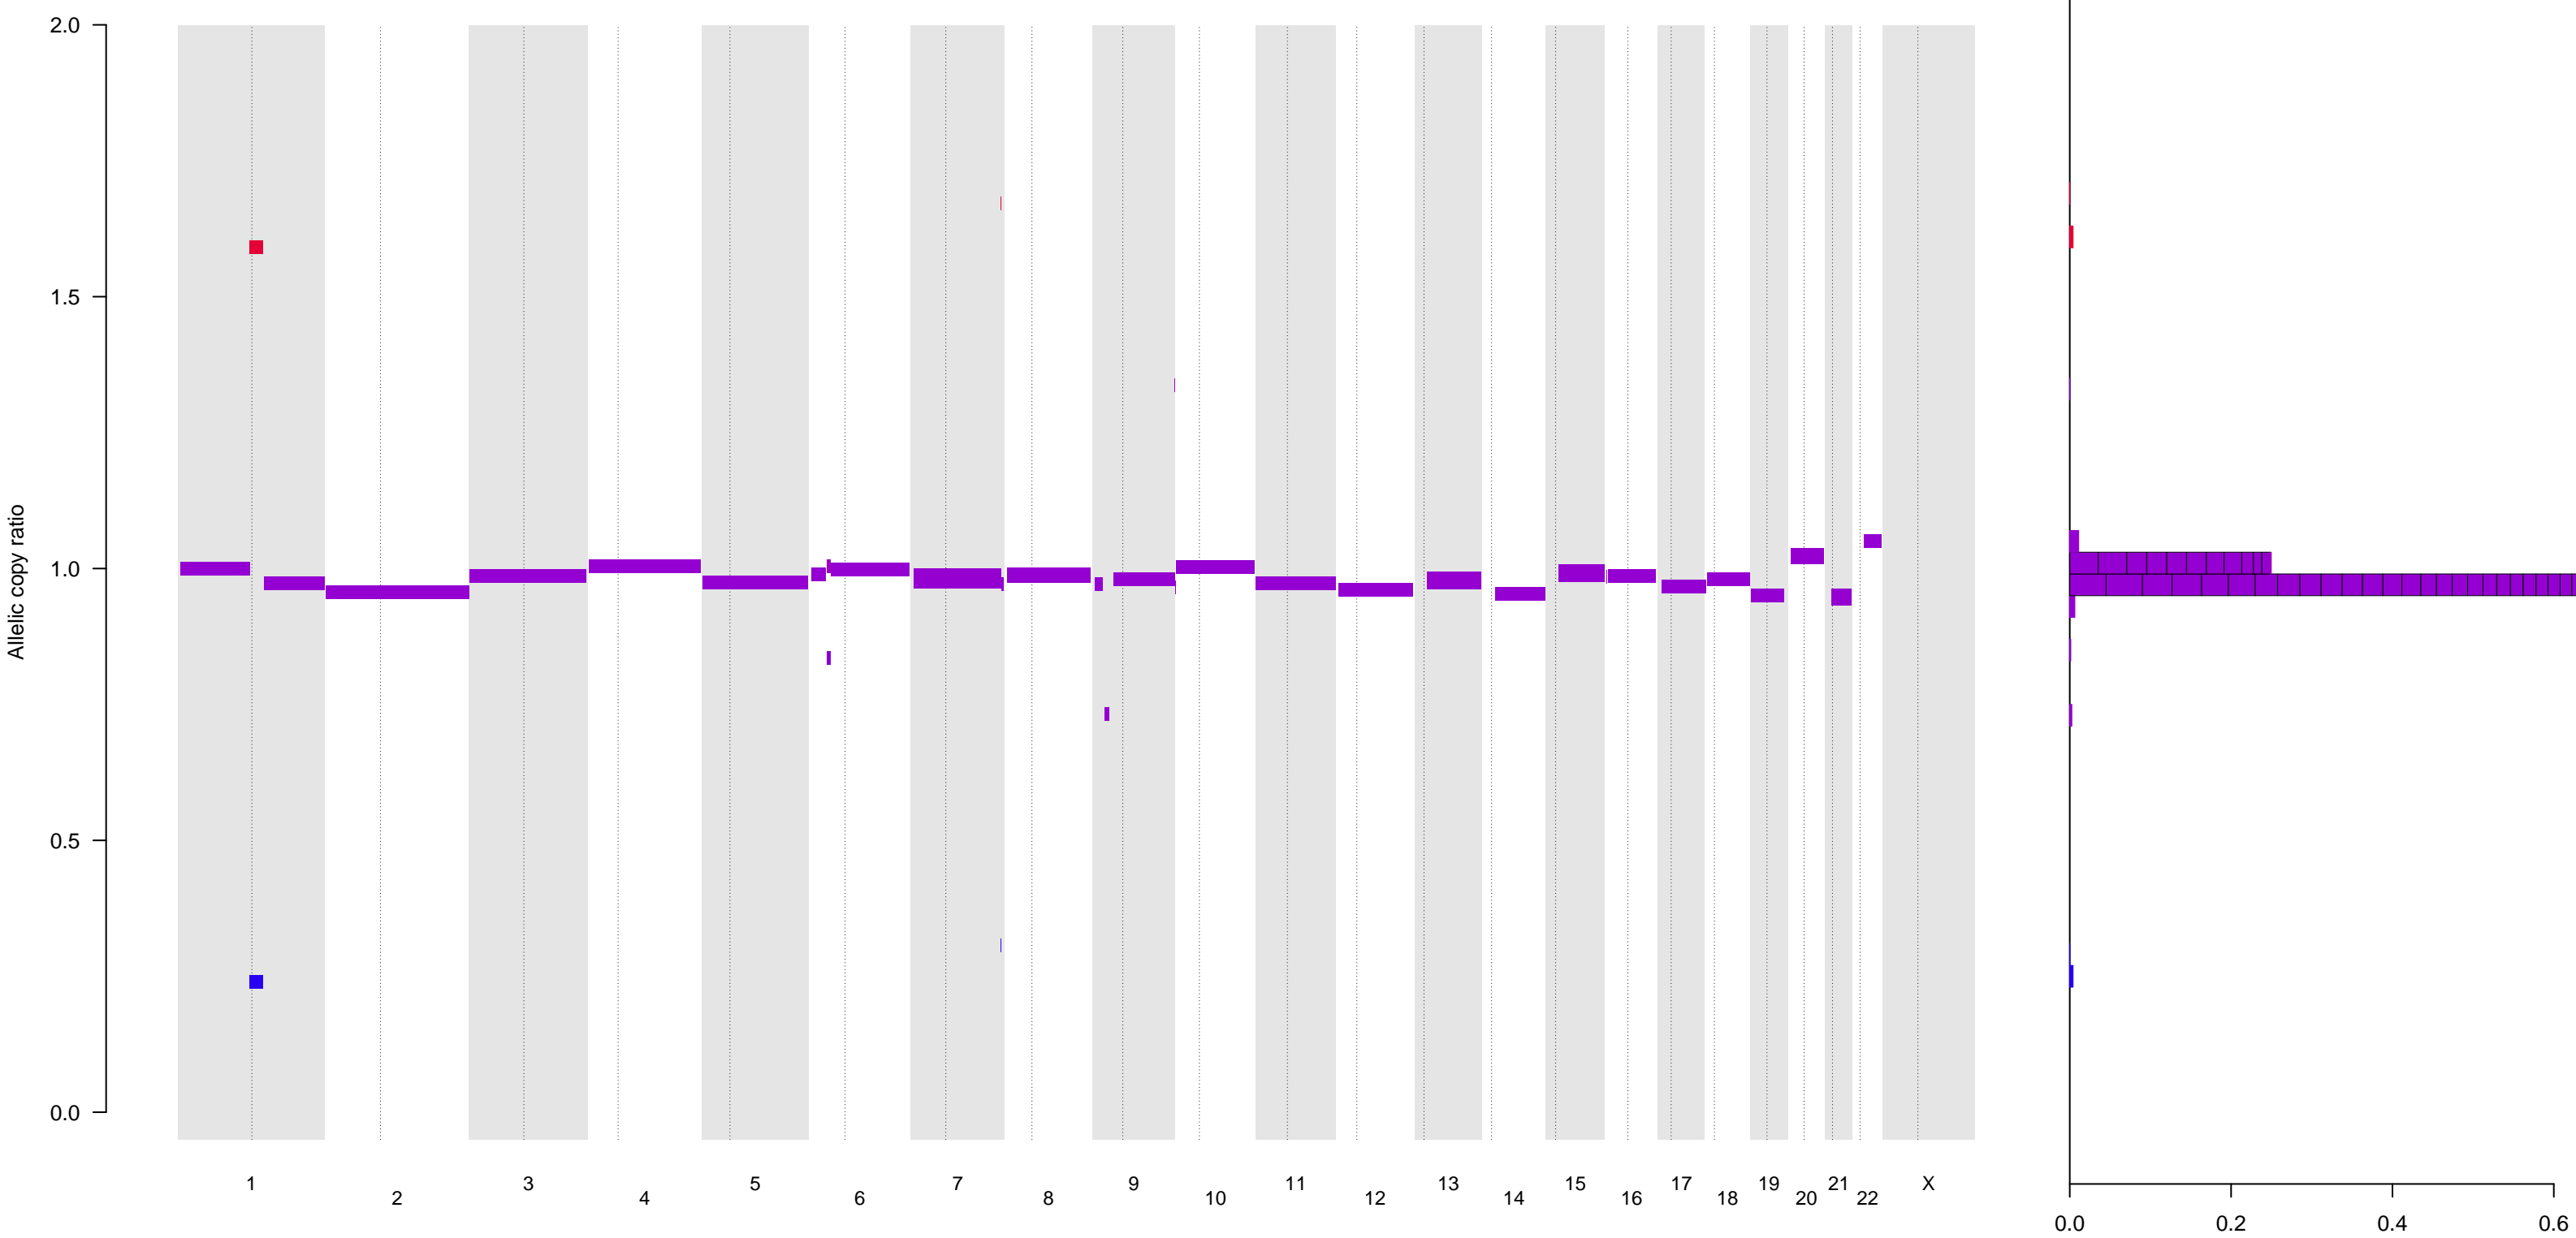

$\hat{\alpha} = 0.29$ , purity:  $\hat{\tau} = 2.13$ ,  $\hat{\tau}_g = 2$   
 $\theta_z = 0.01$ ,  $\theta_a = 1.362$ , WGD=0  
 SCNA LL = -204.01, SSNV LL = -7468.88, SCNA Ev = -29.60161

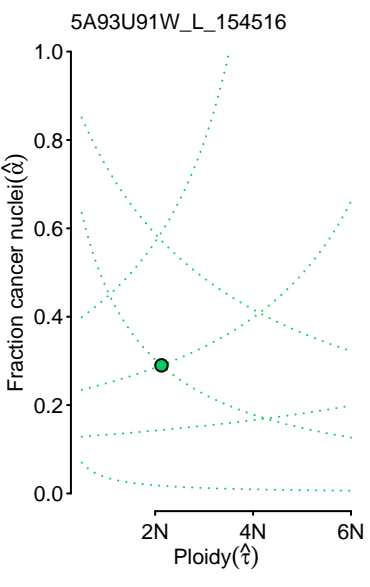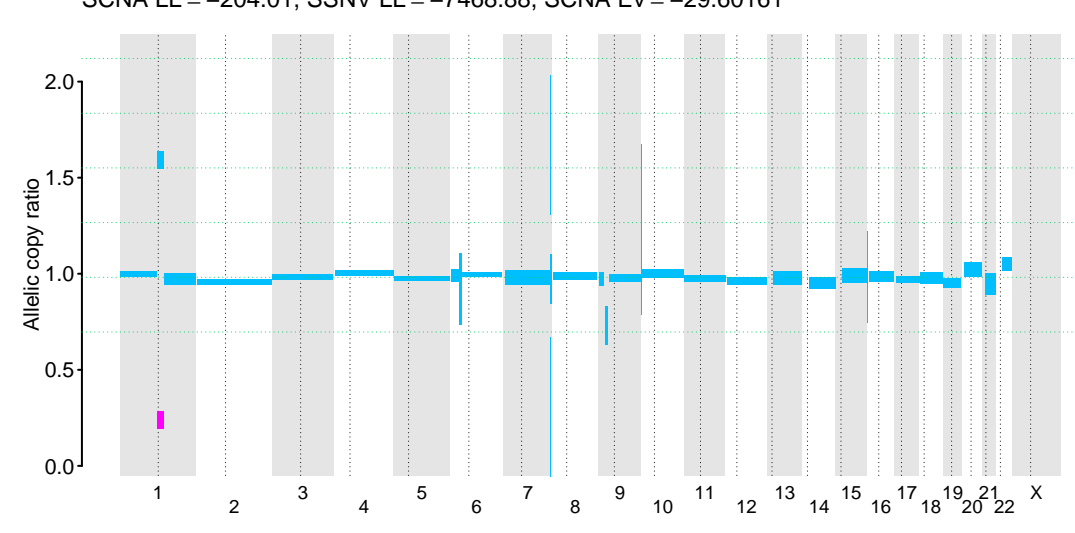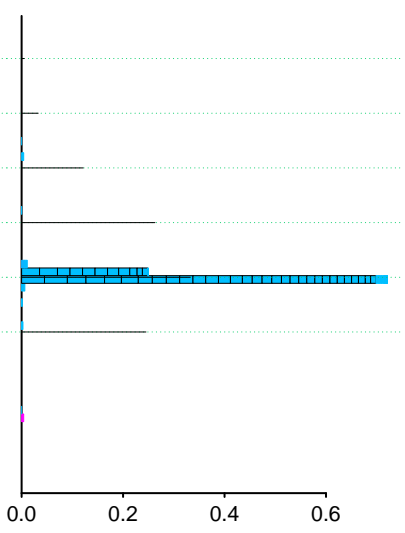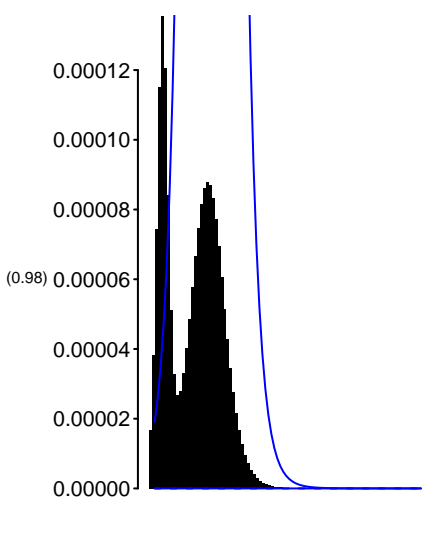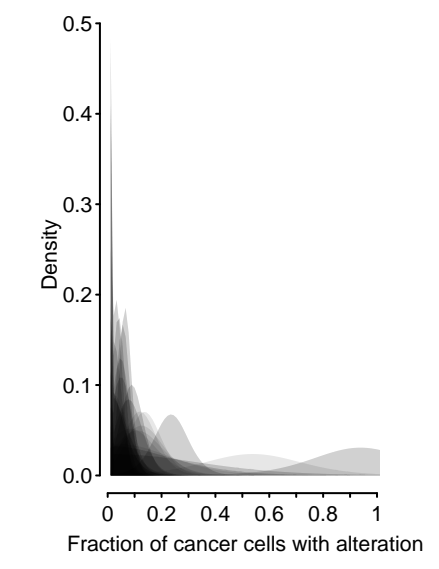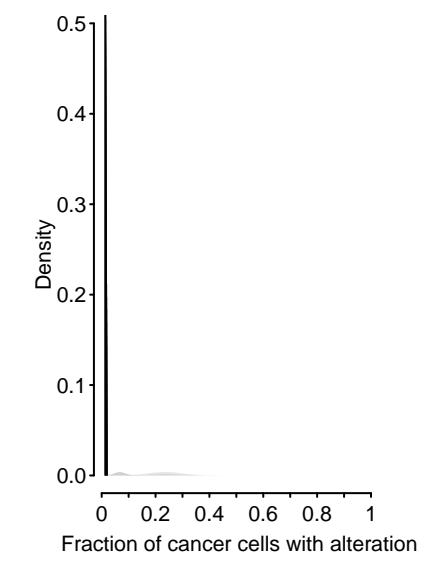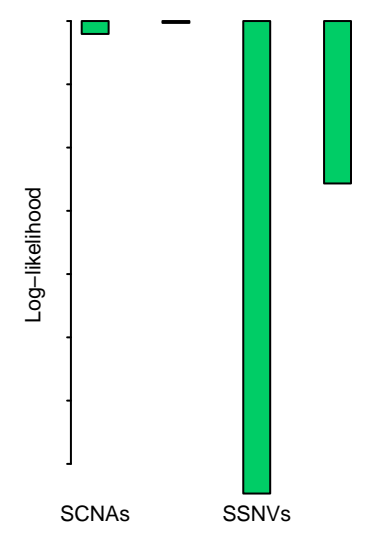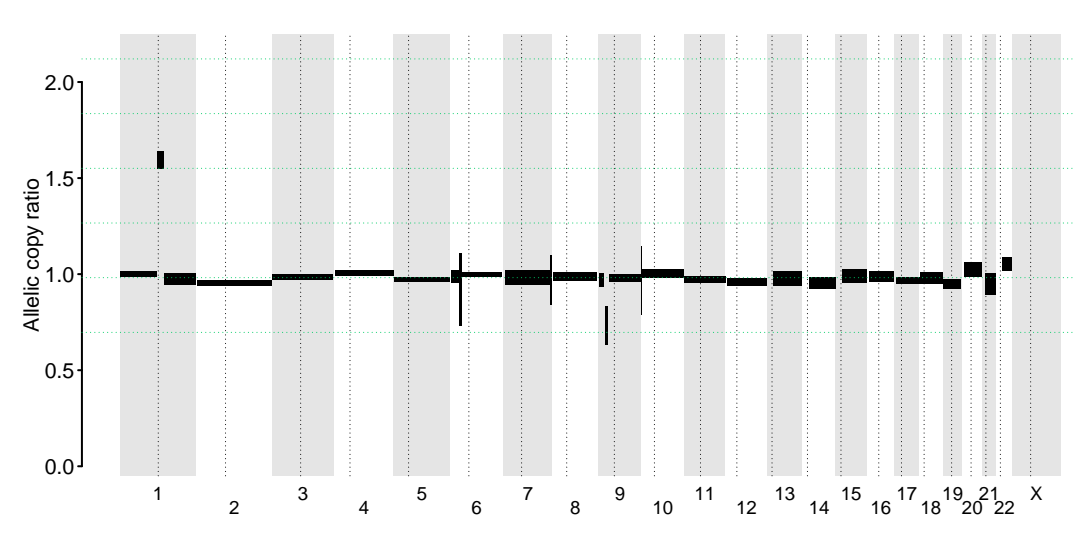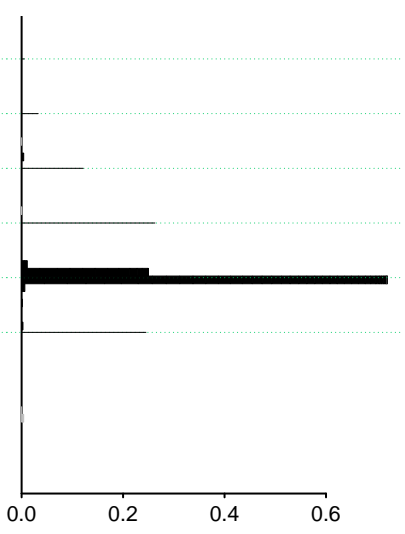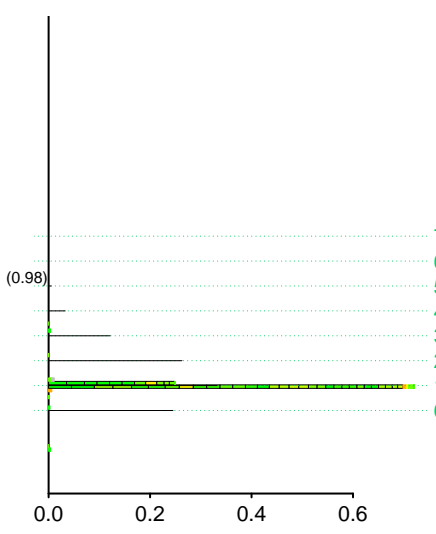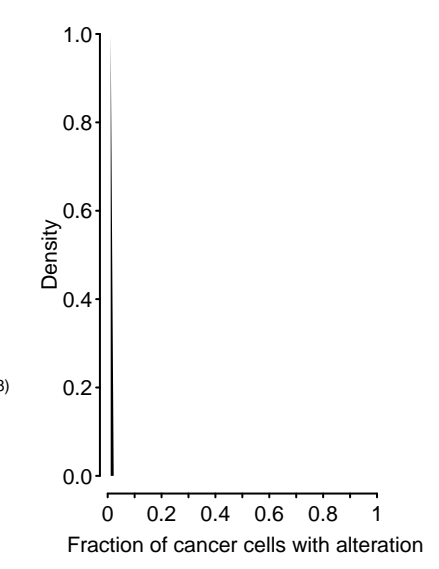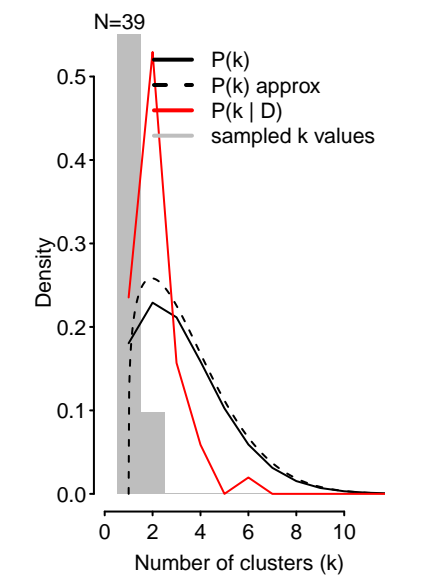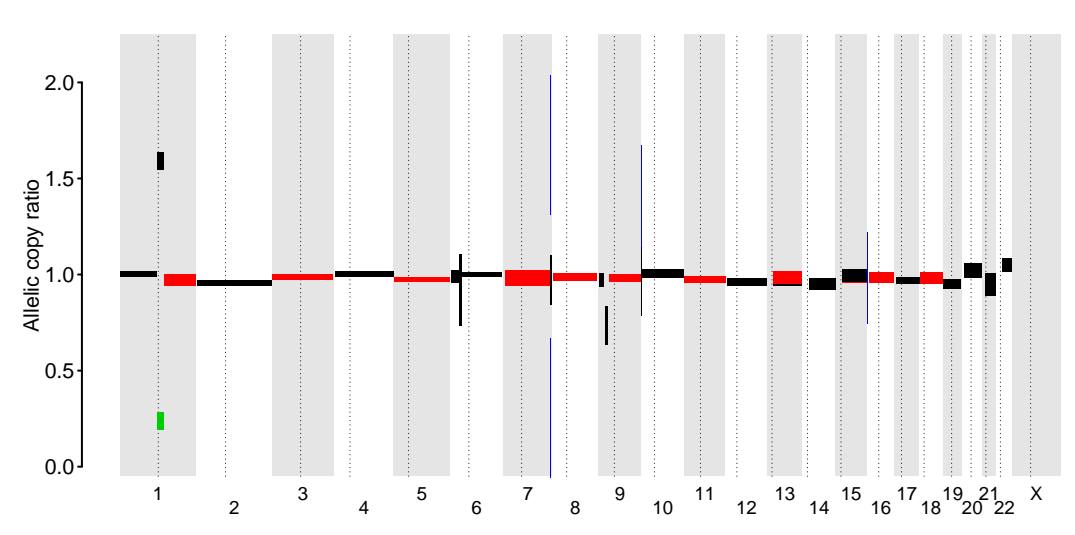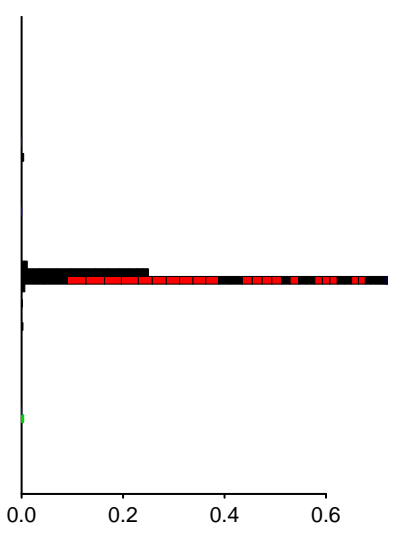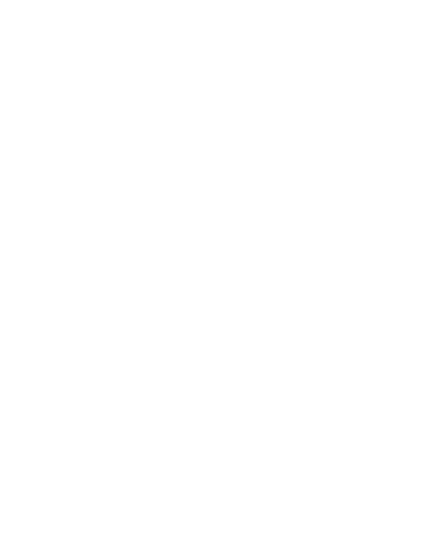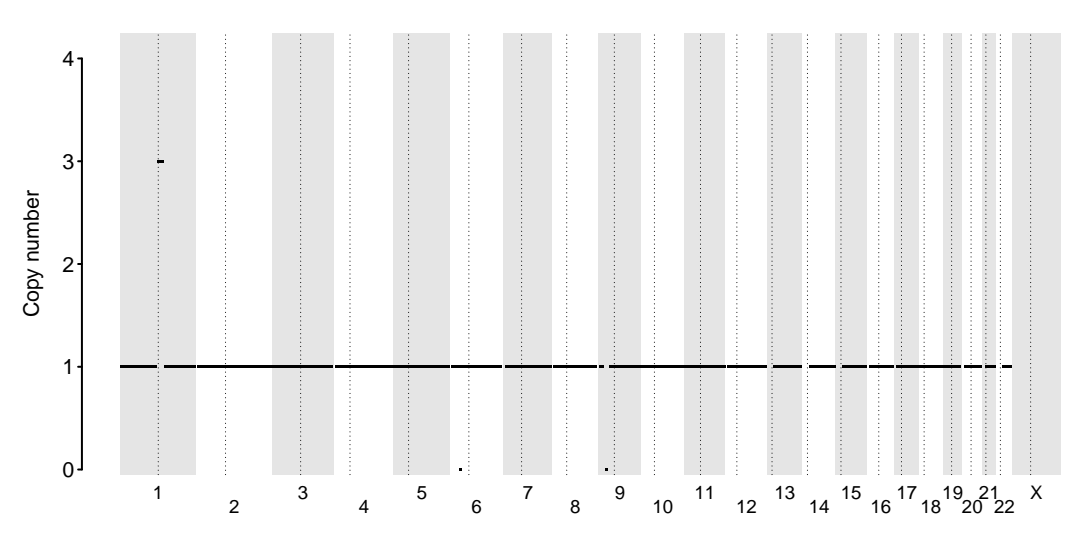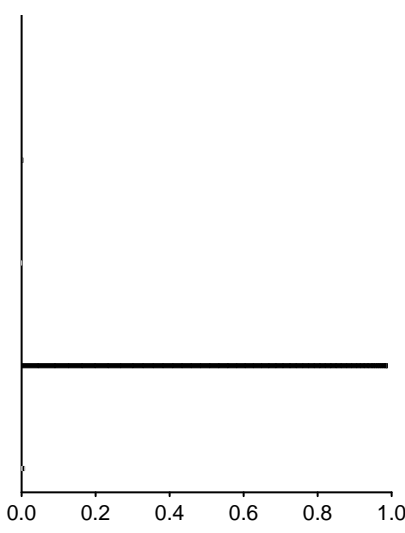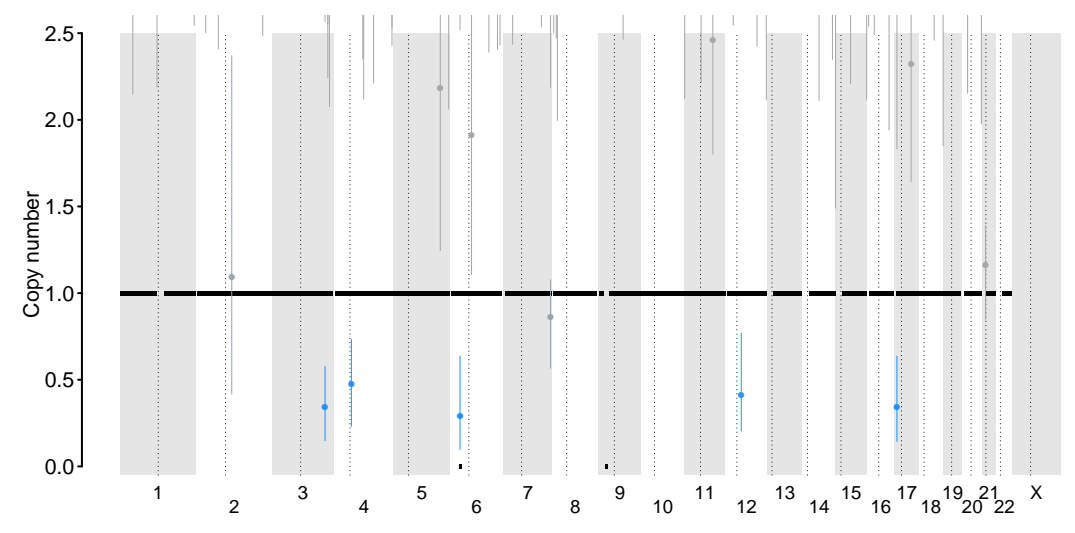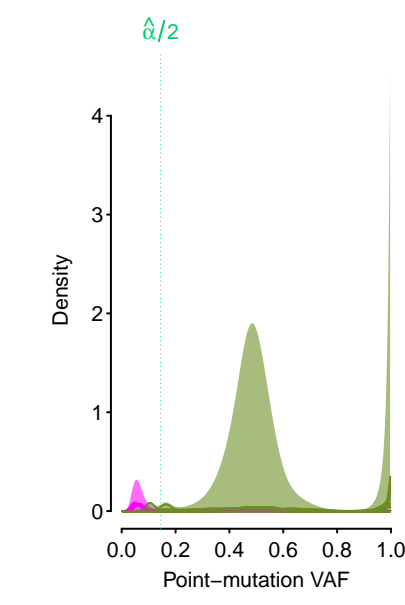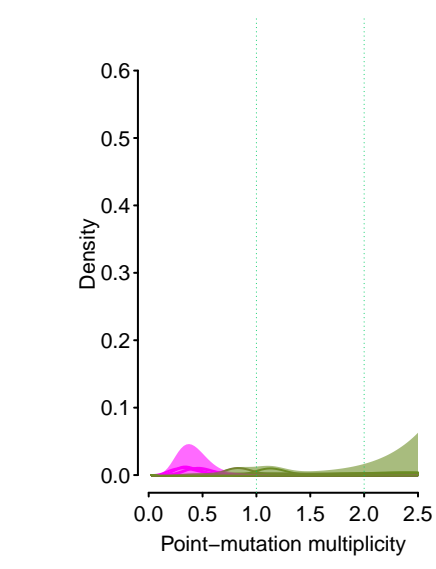

Sample 5

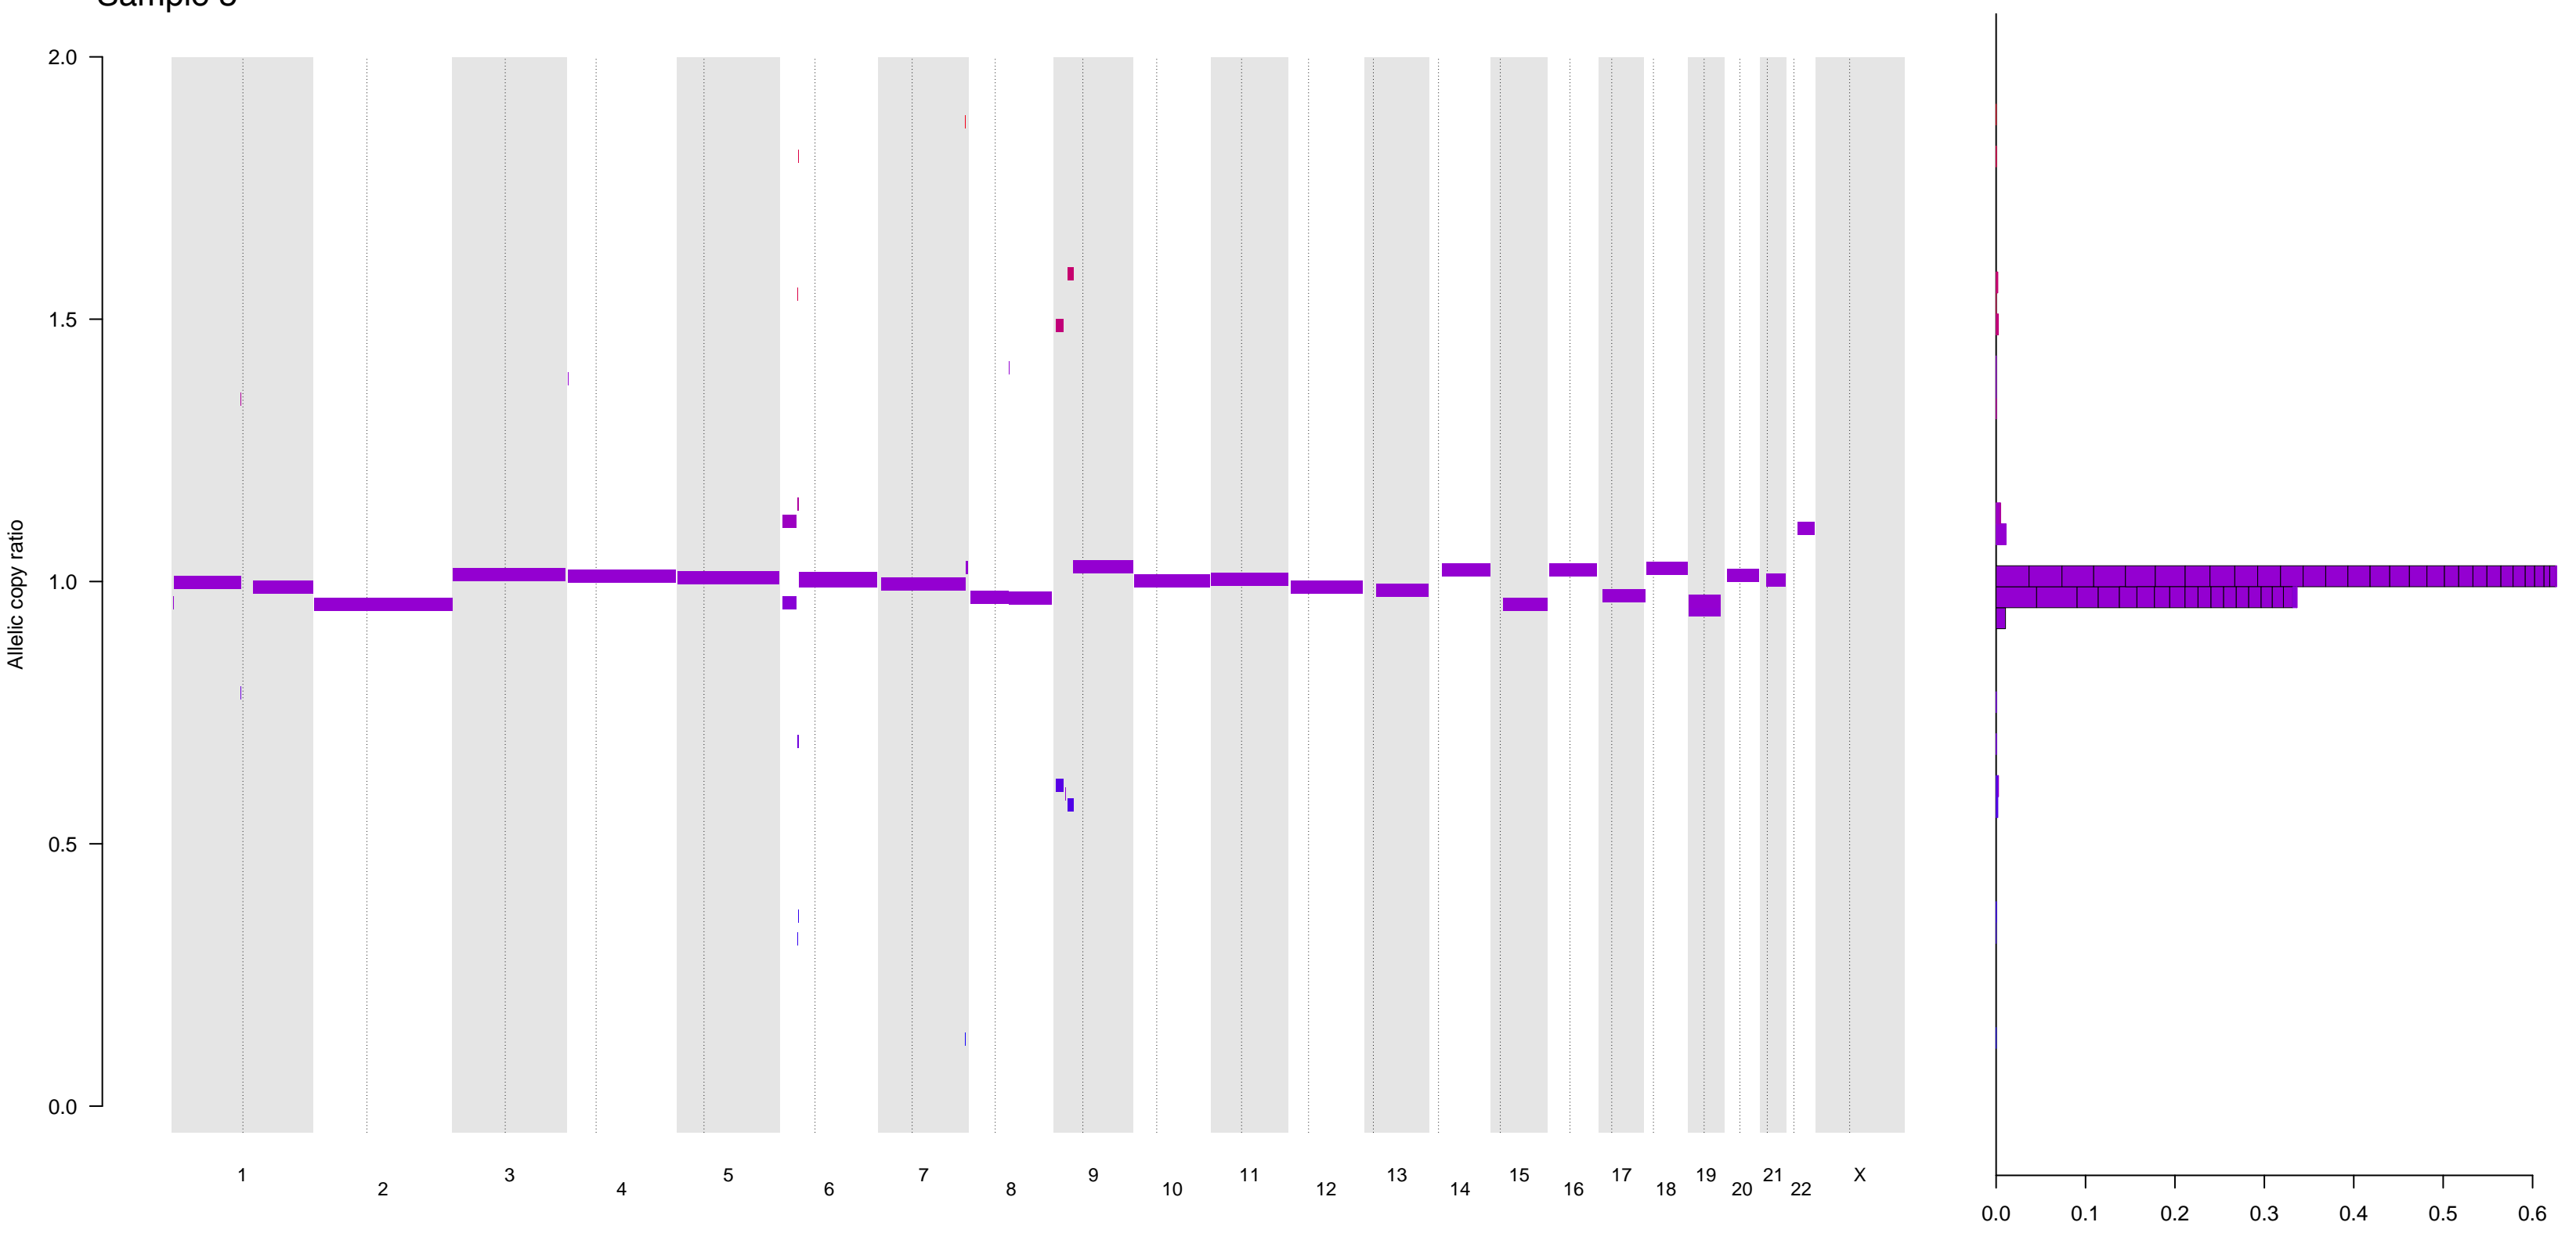

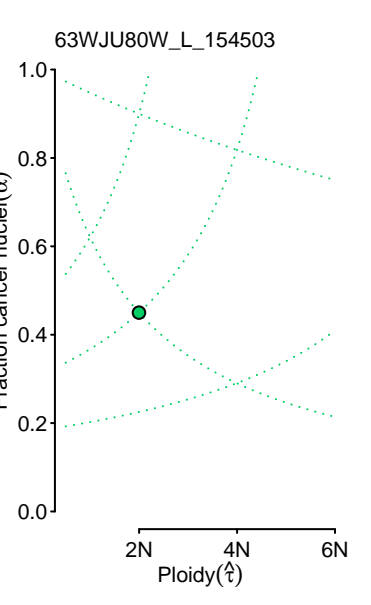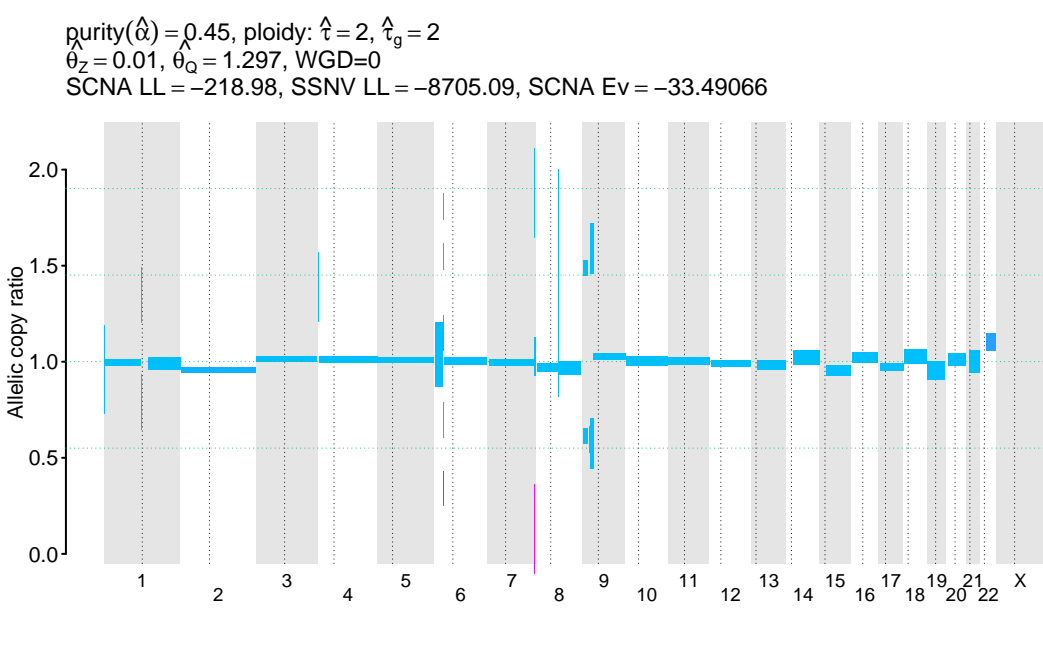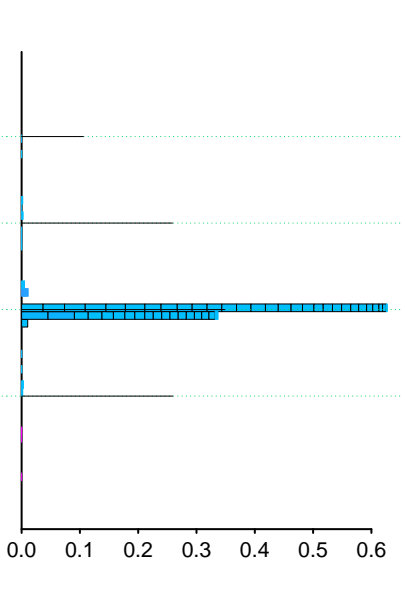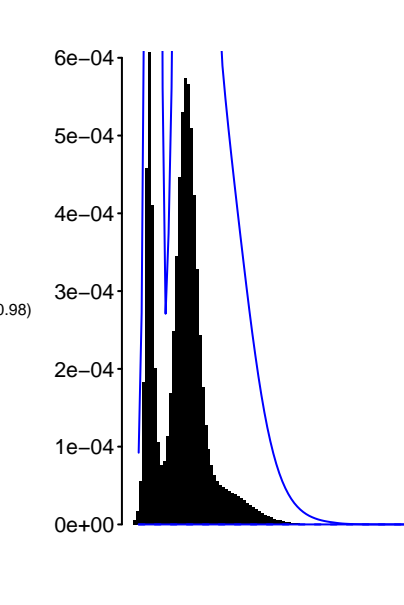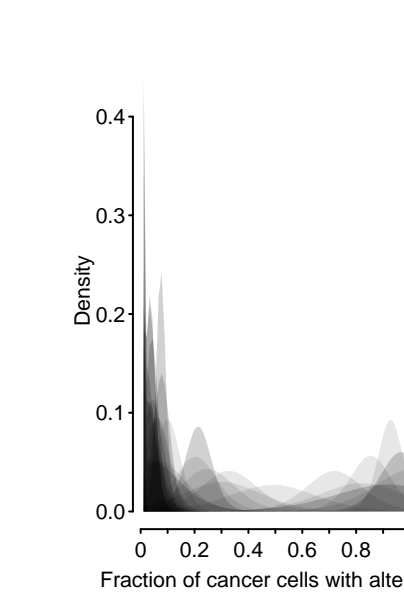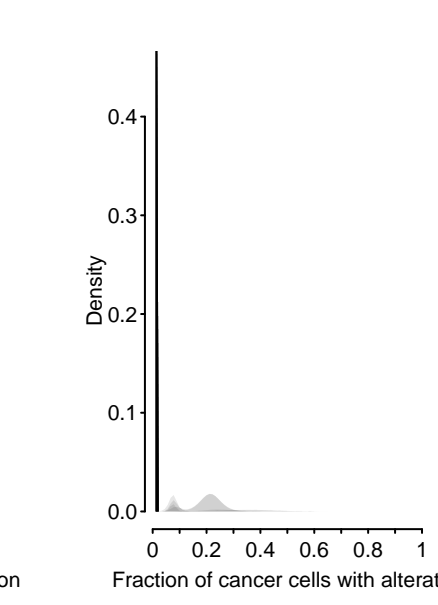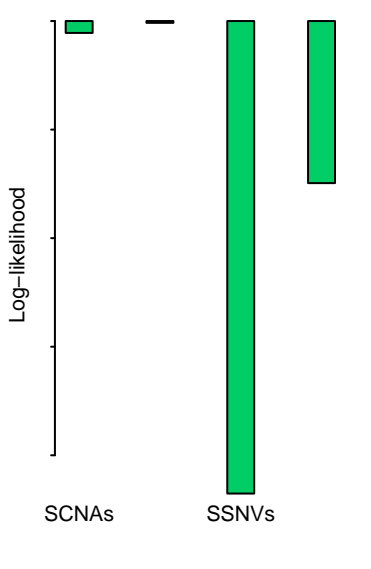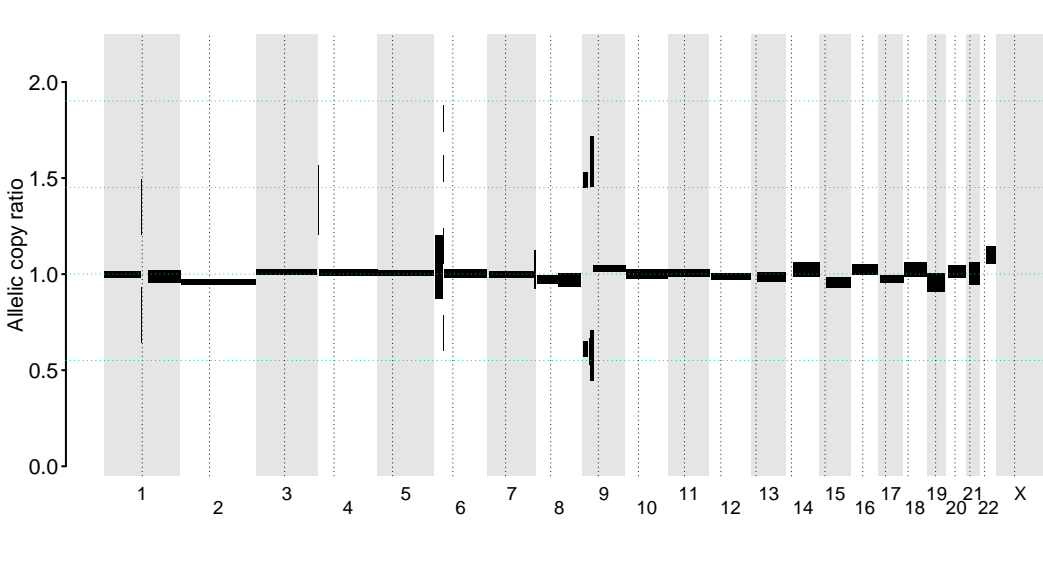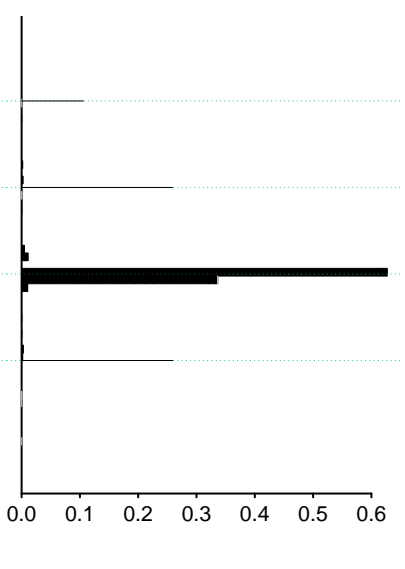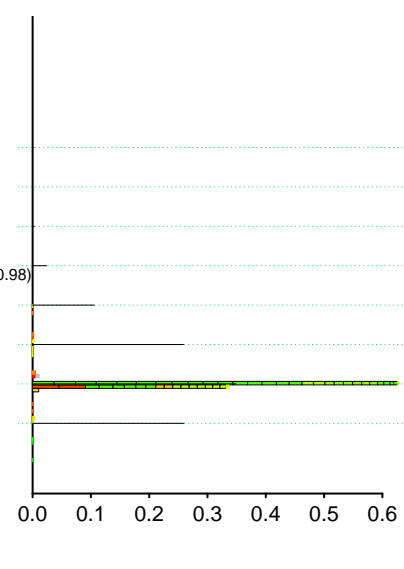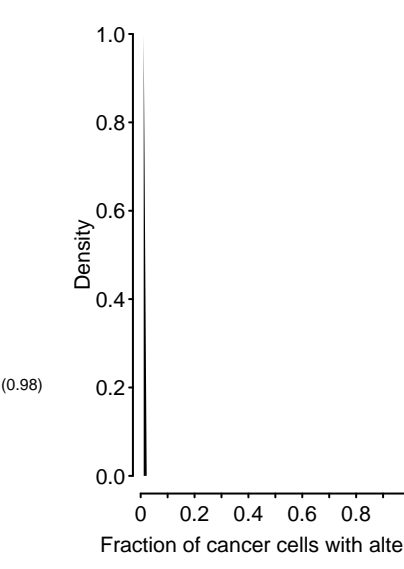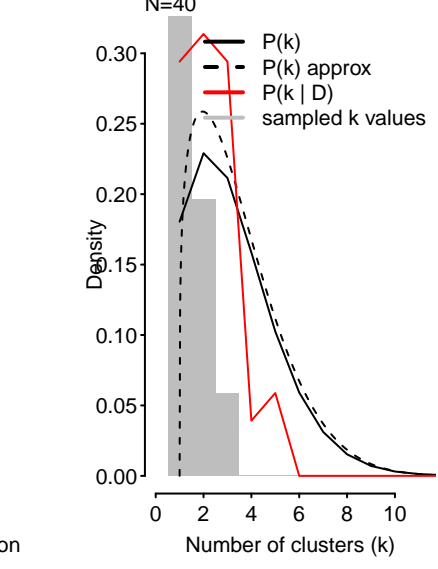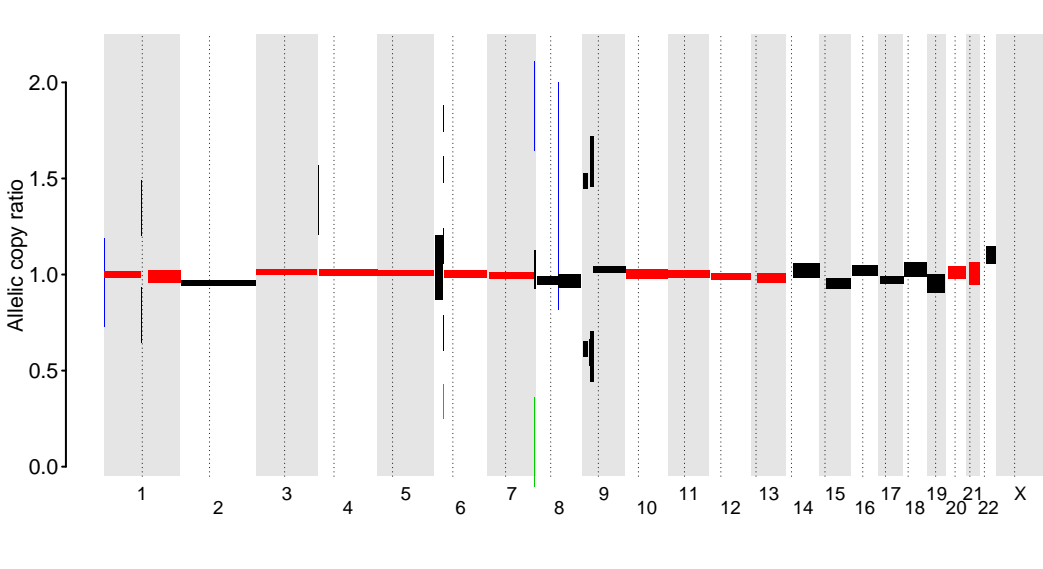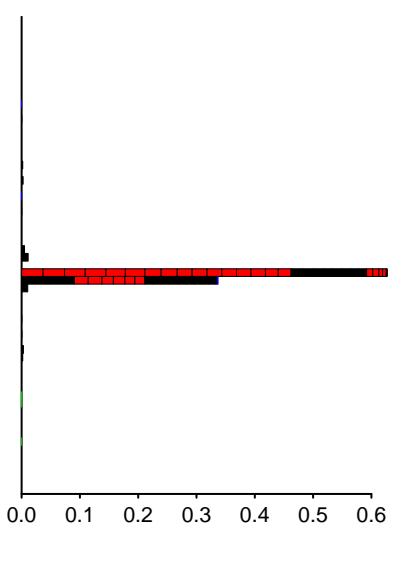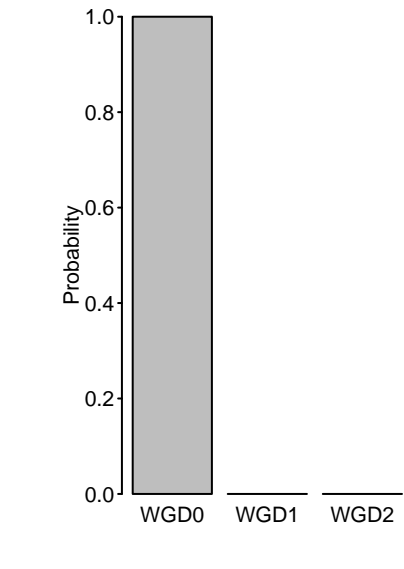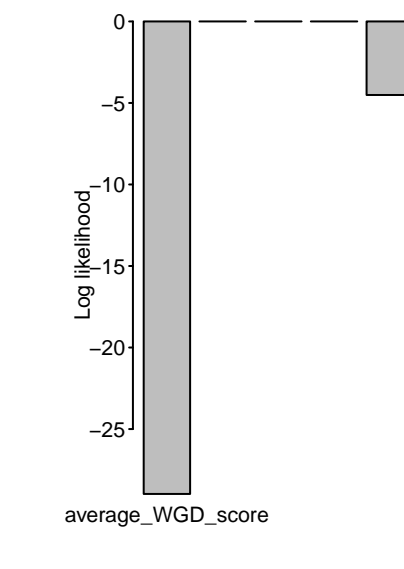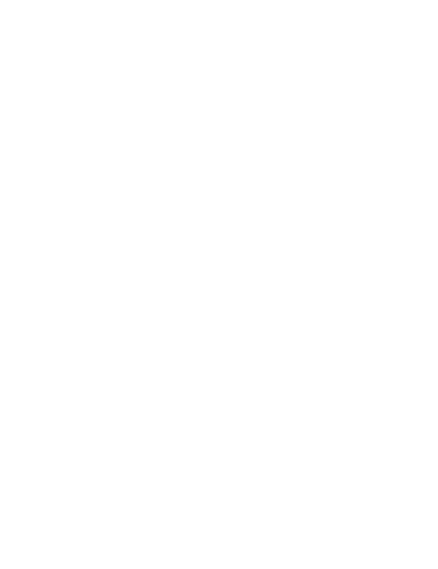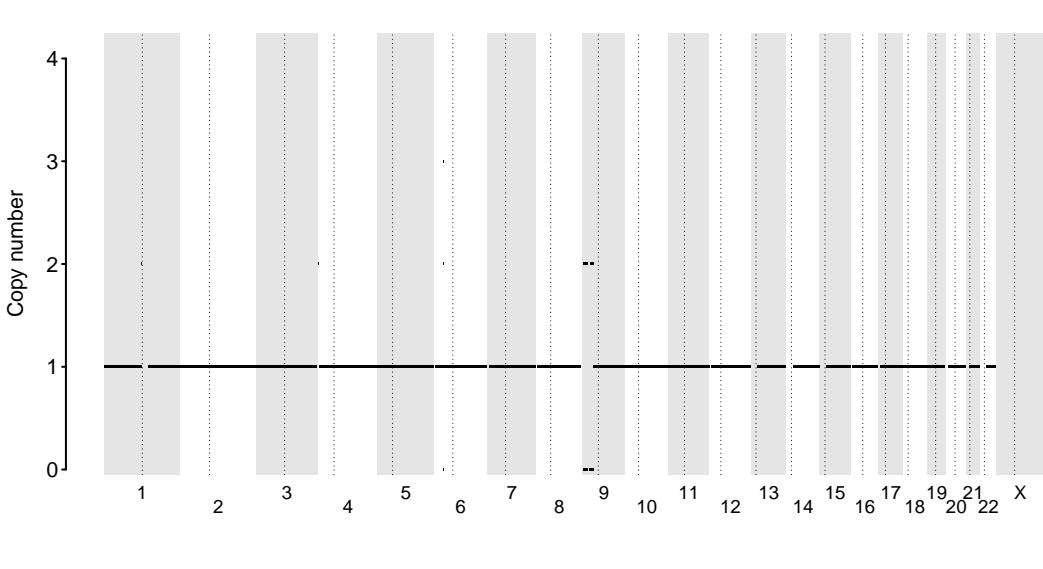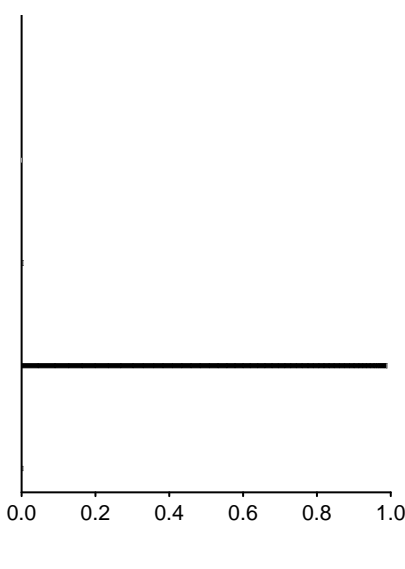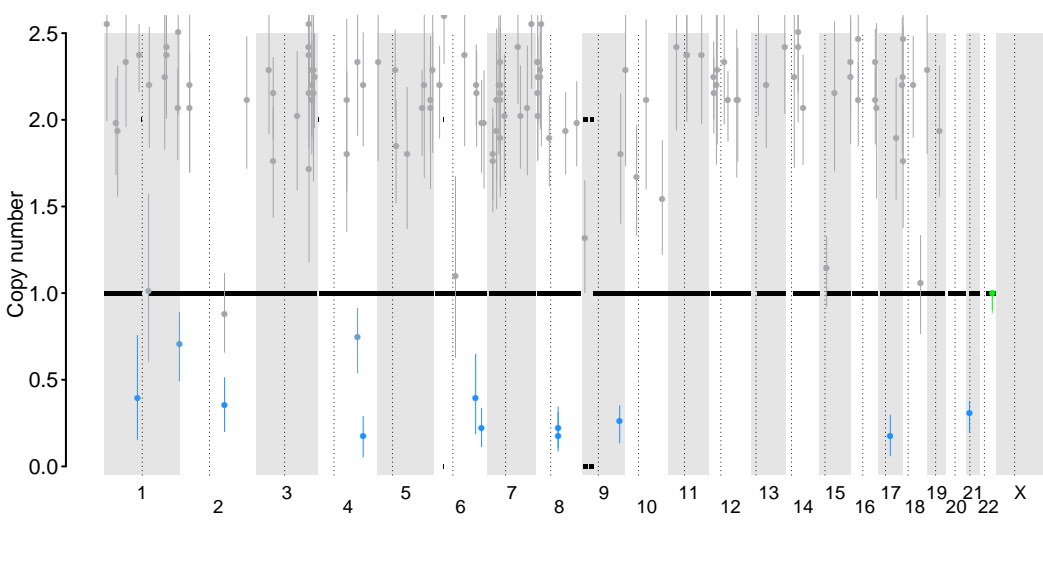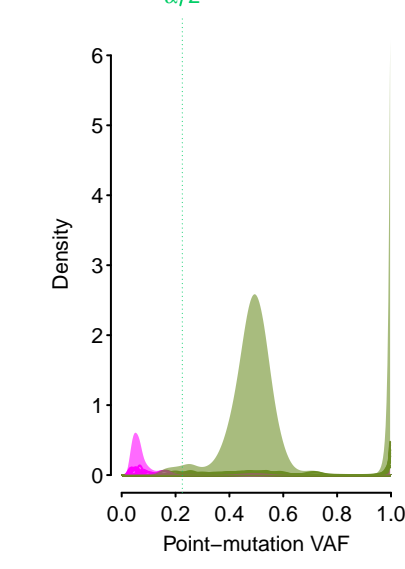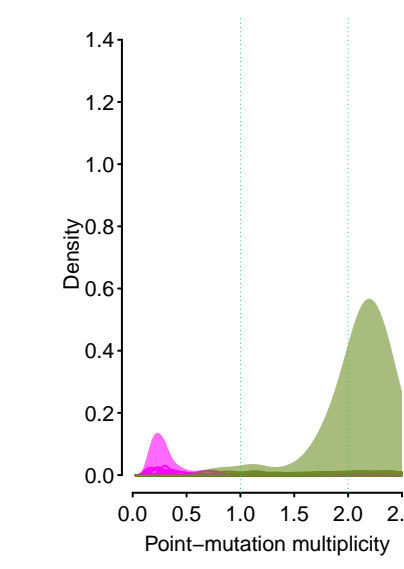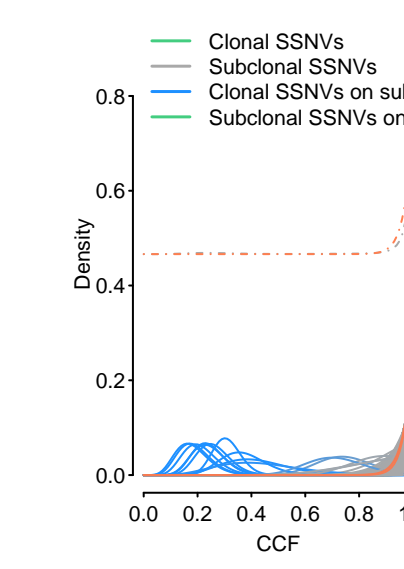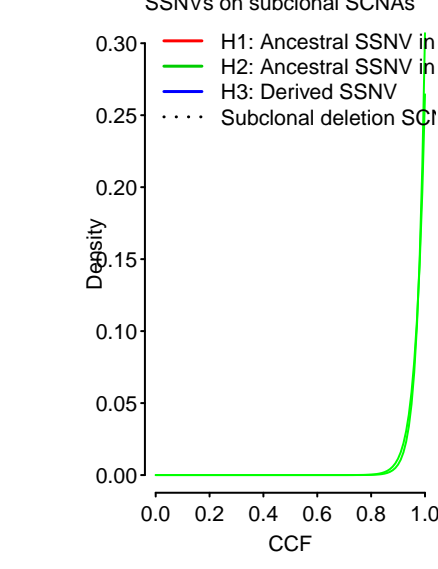



Sample 6

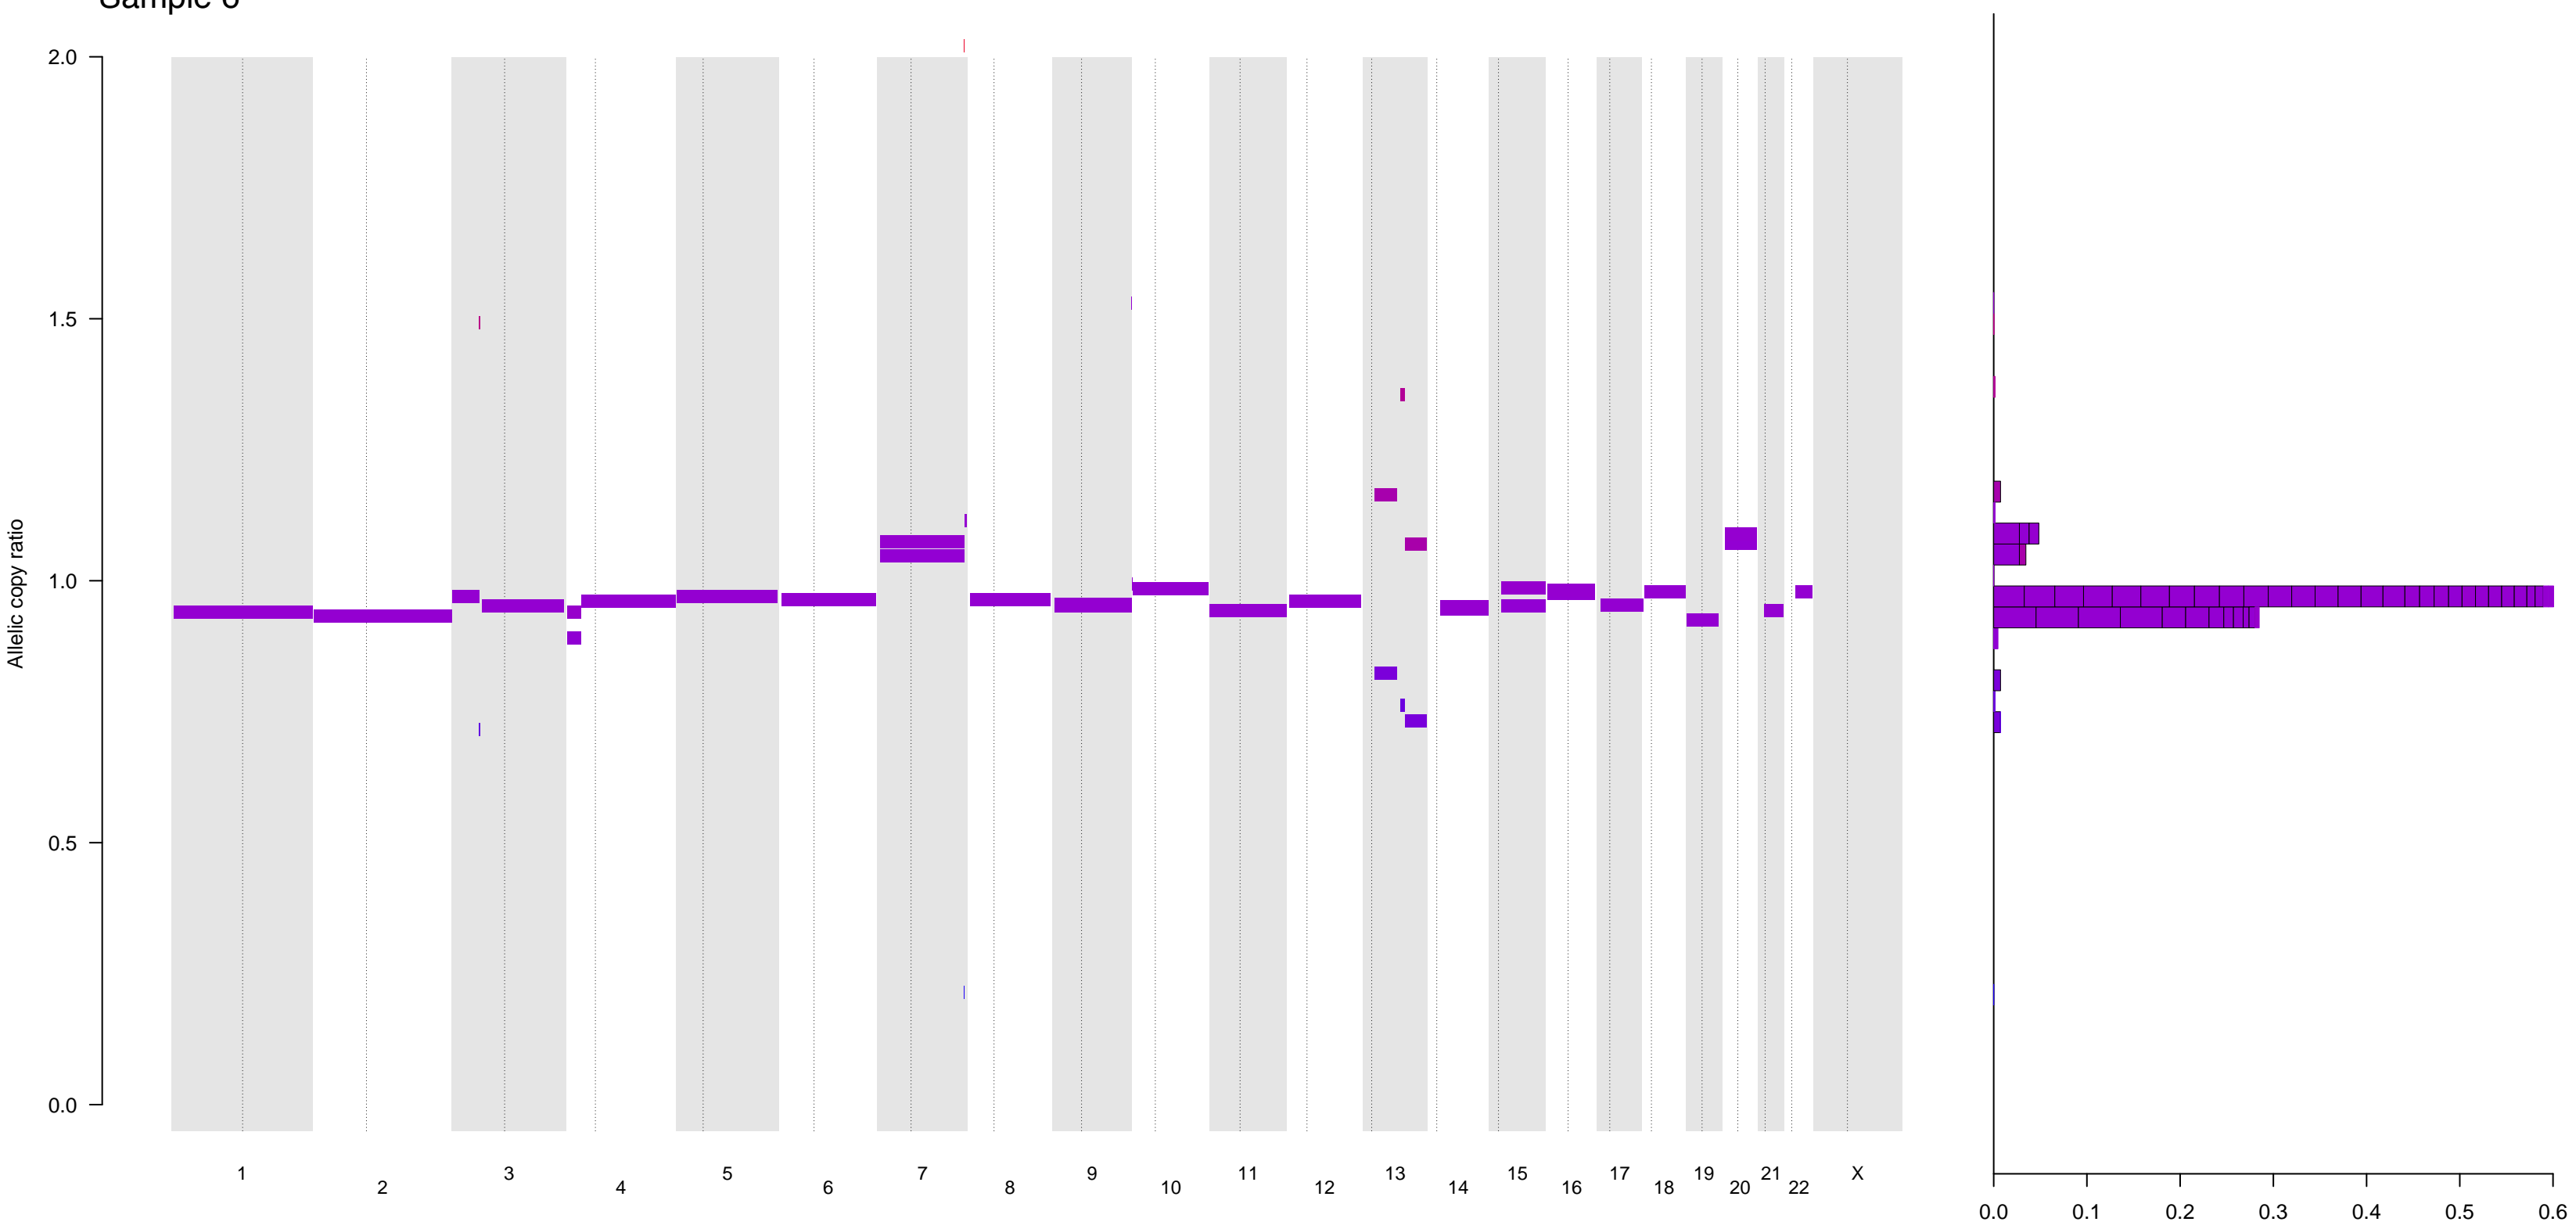

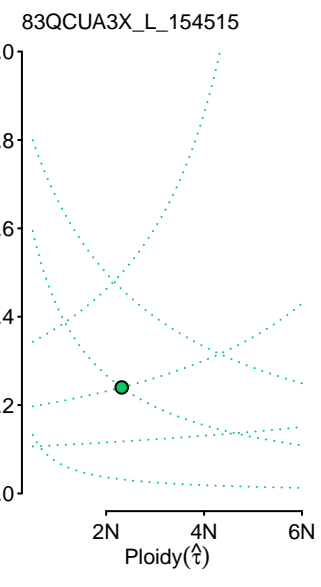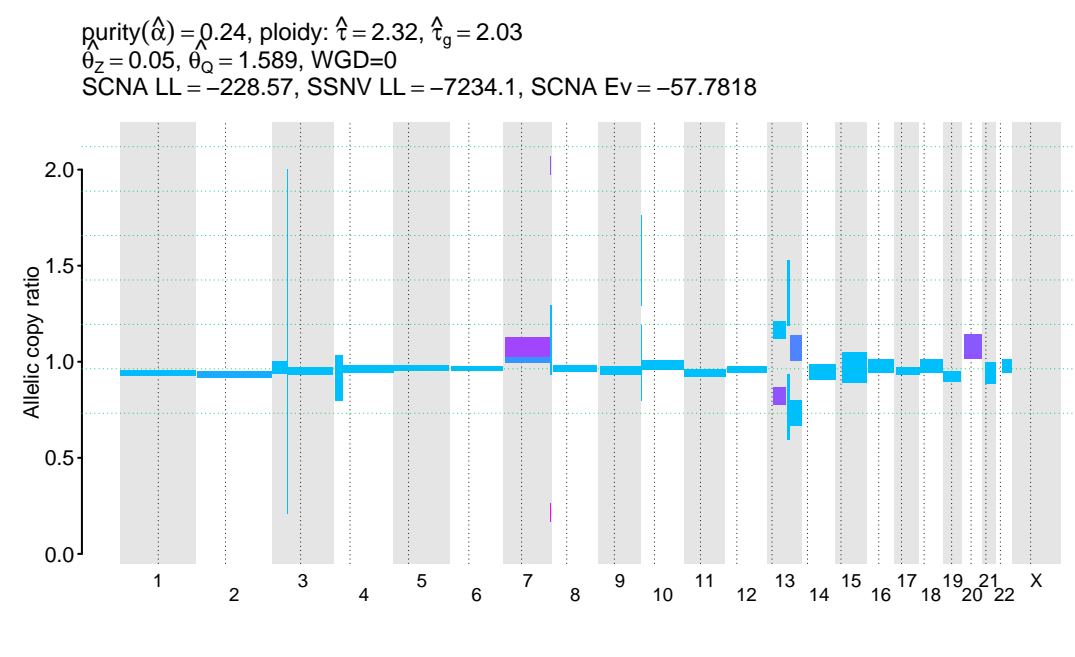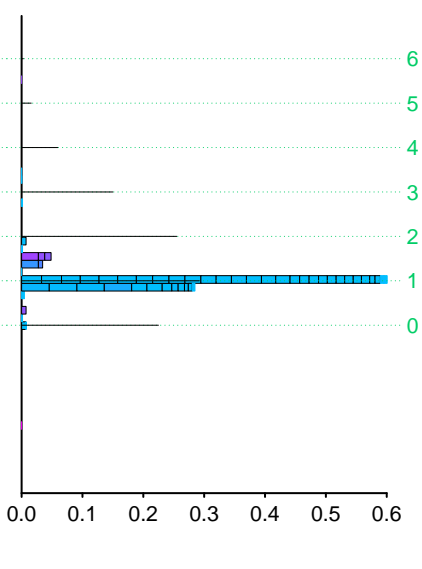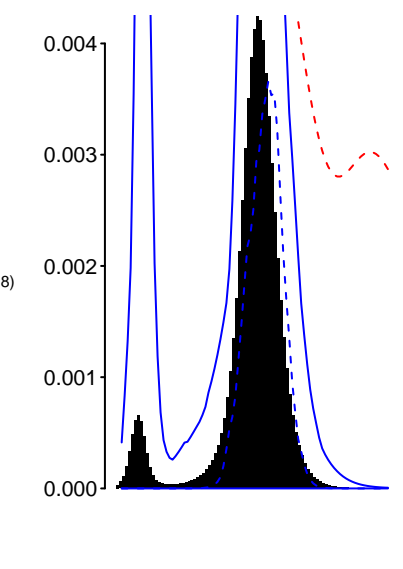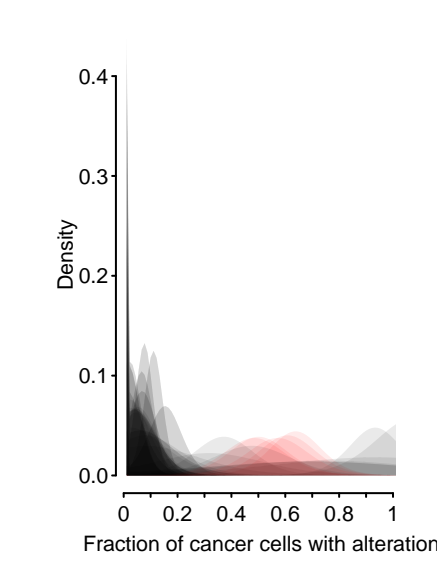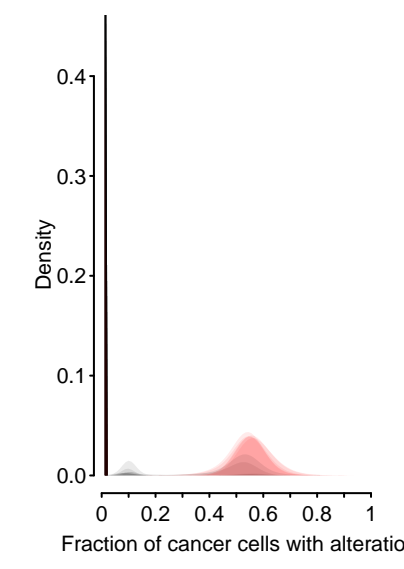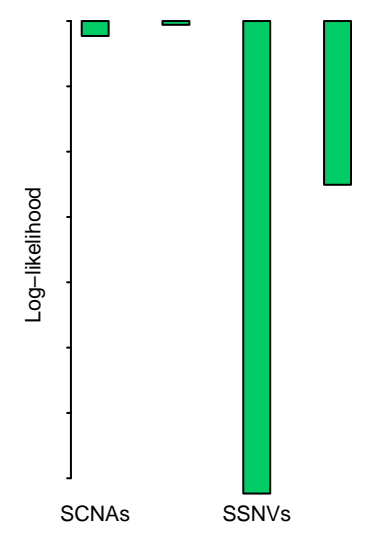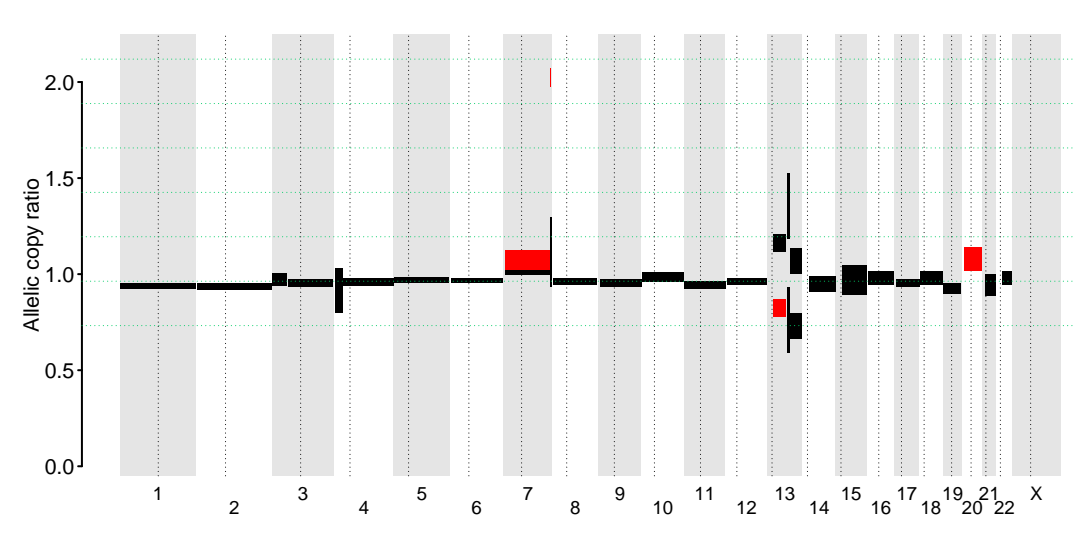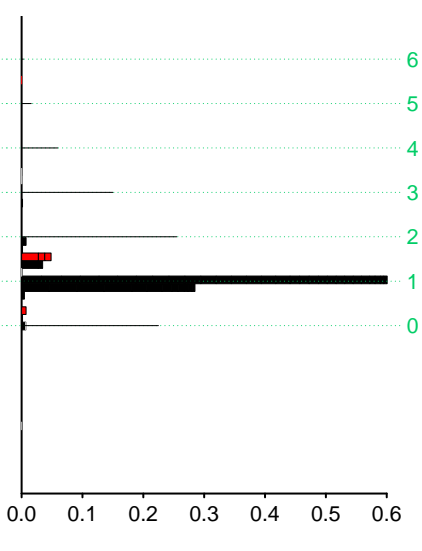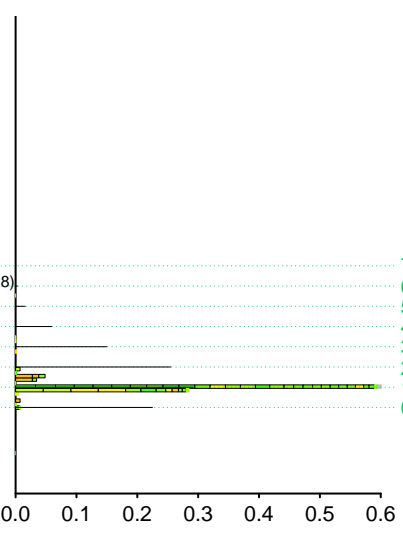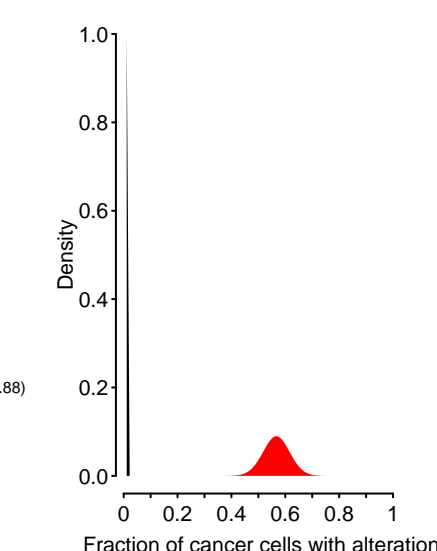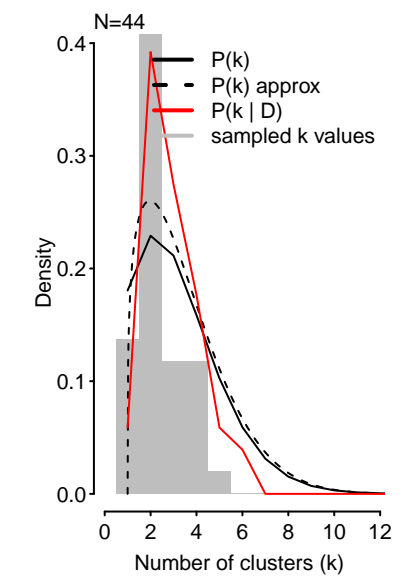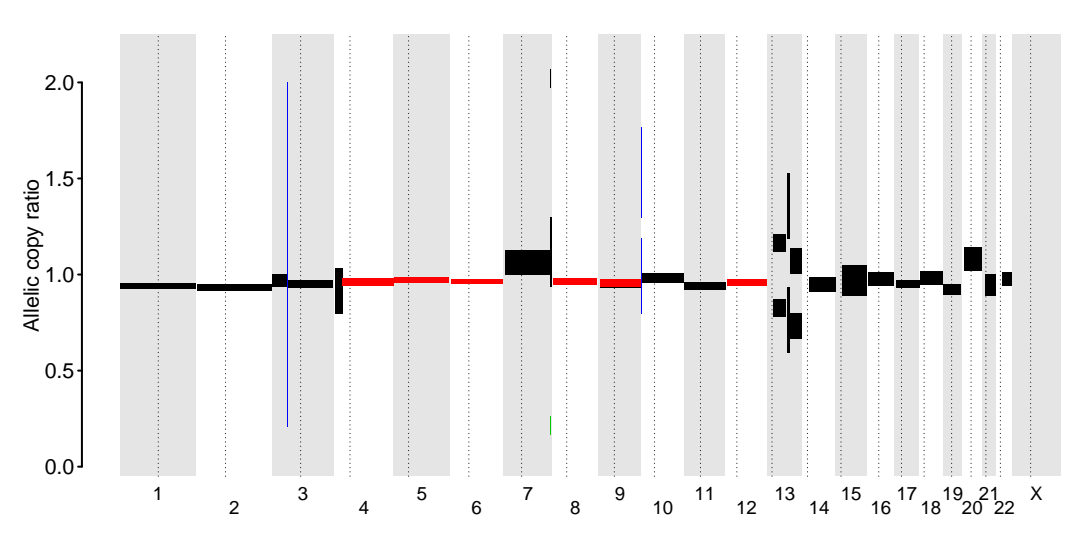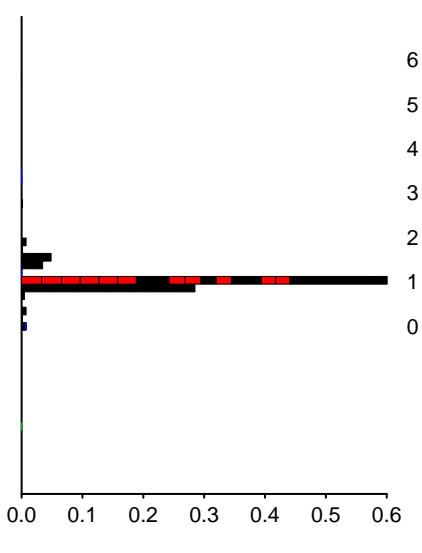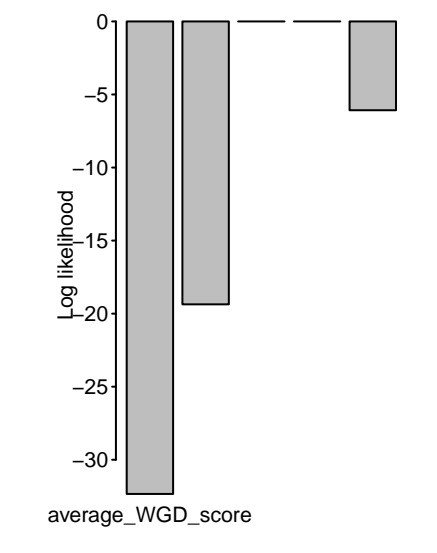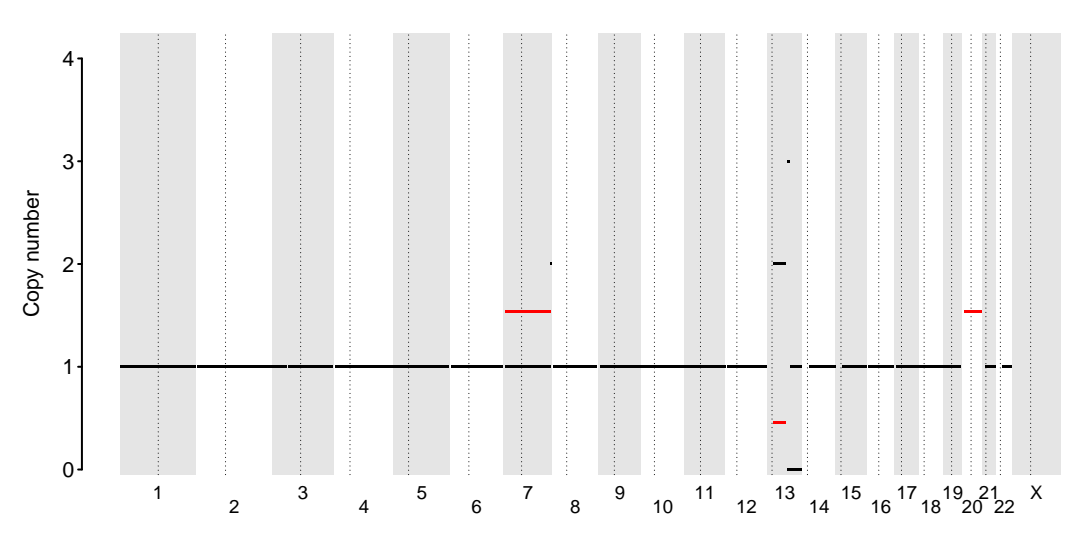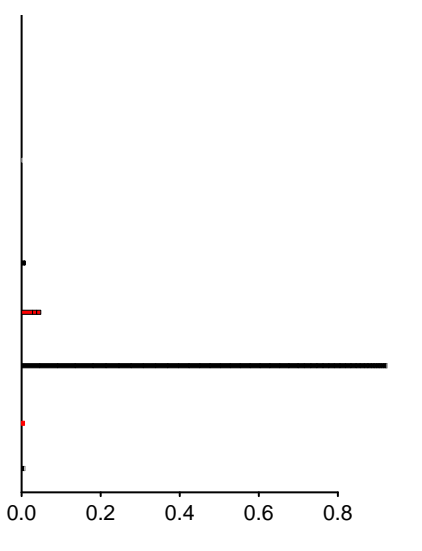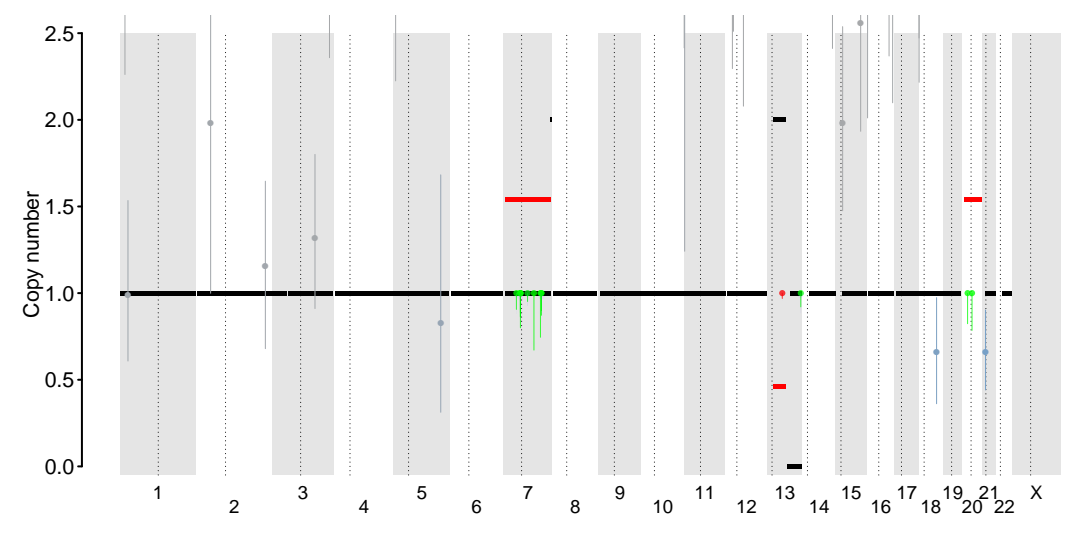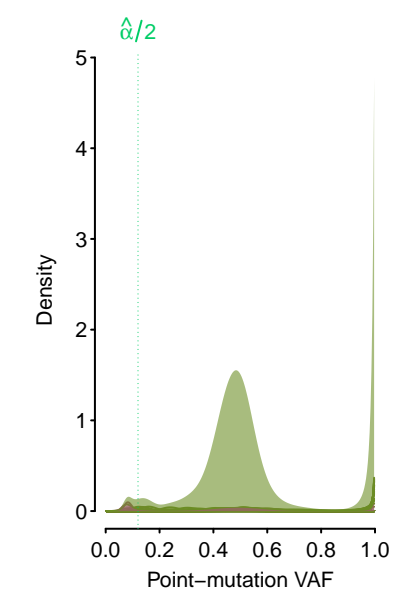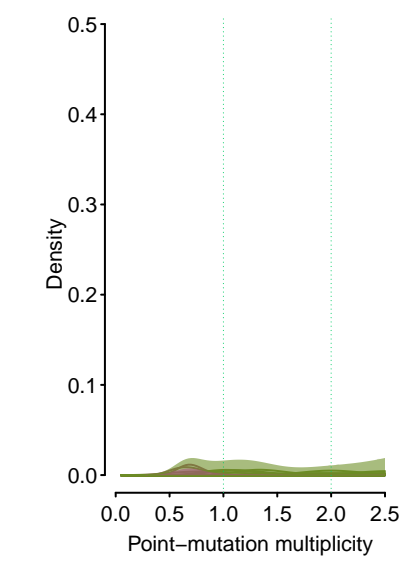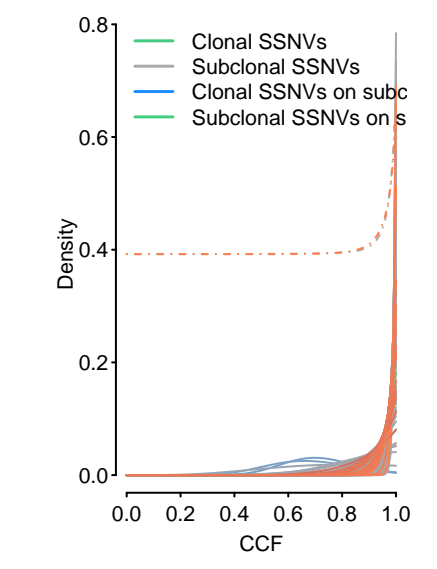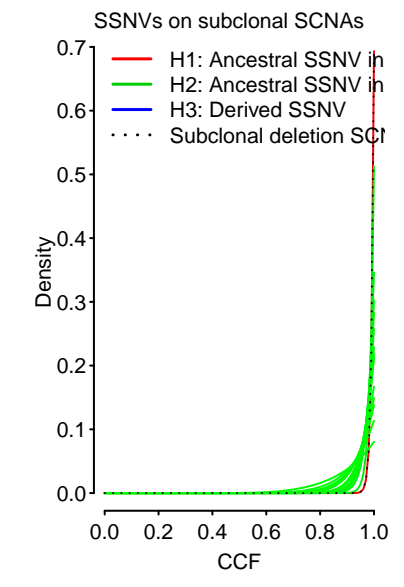

Sample 7

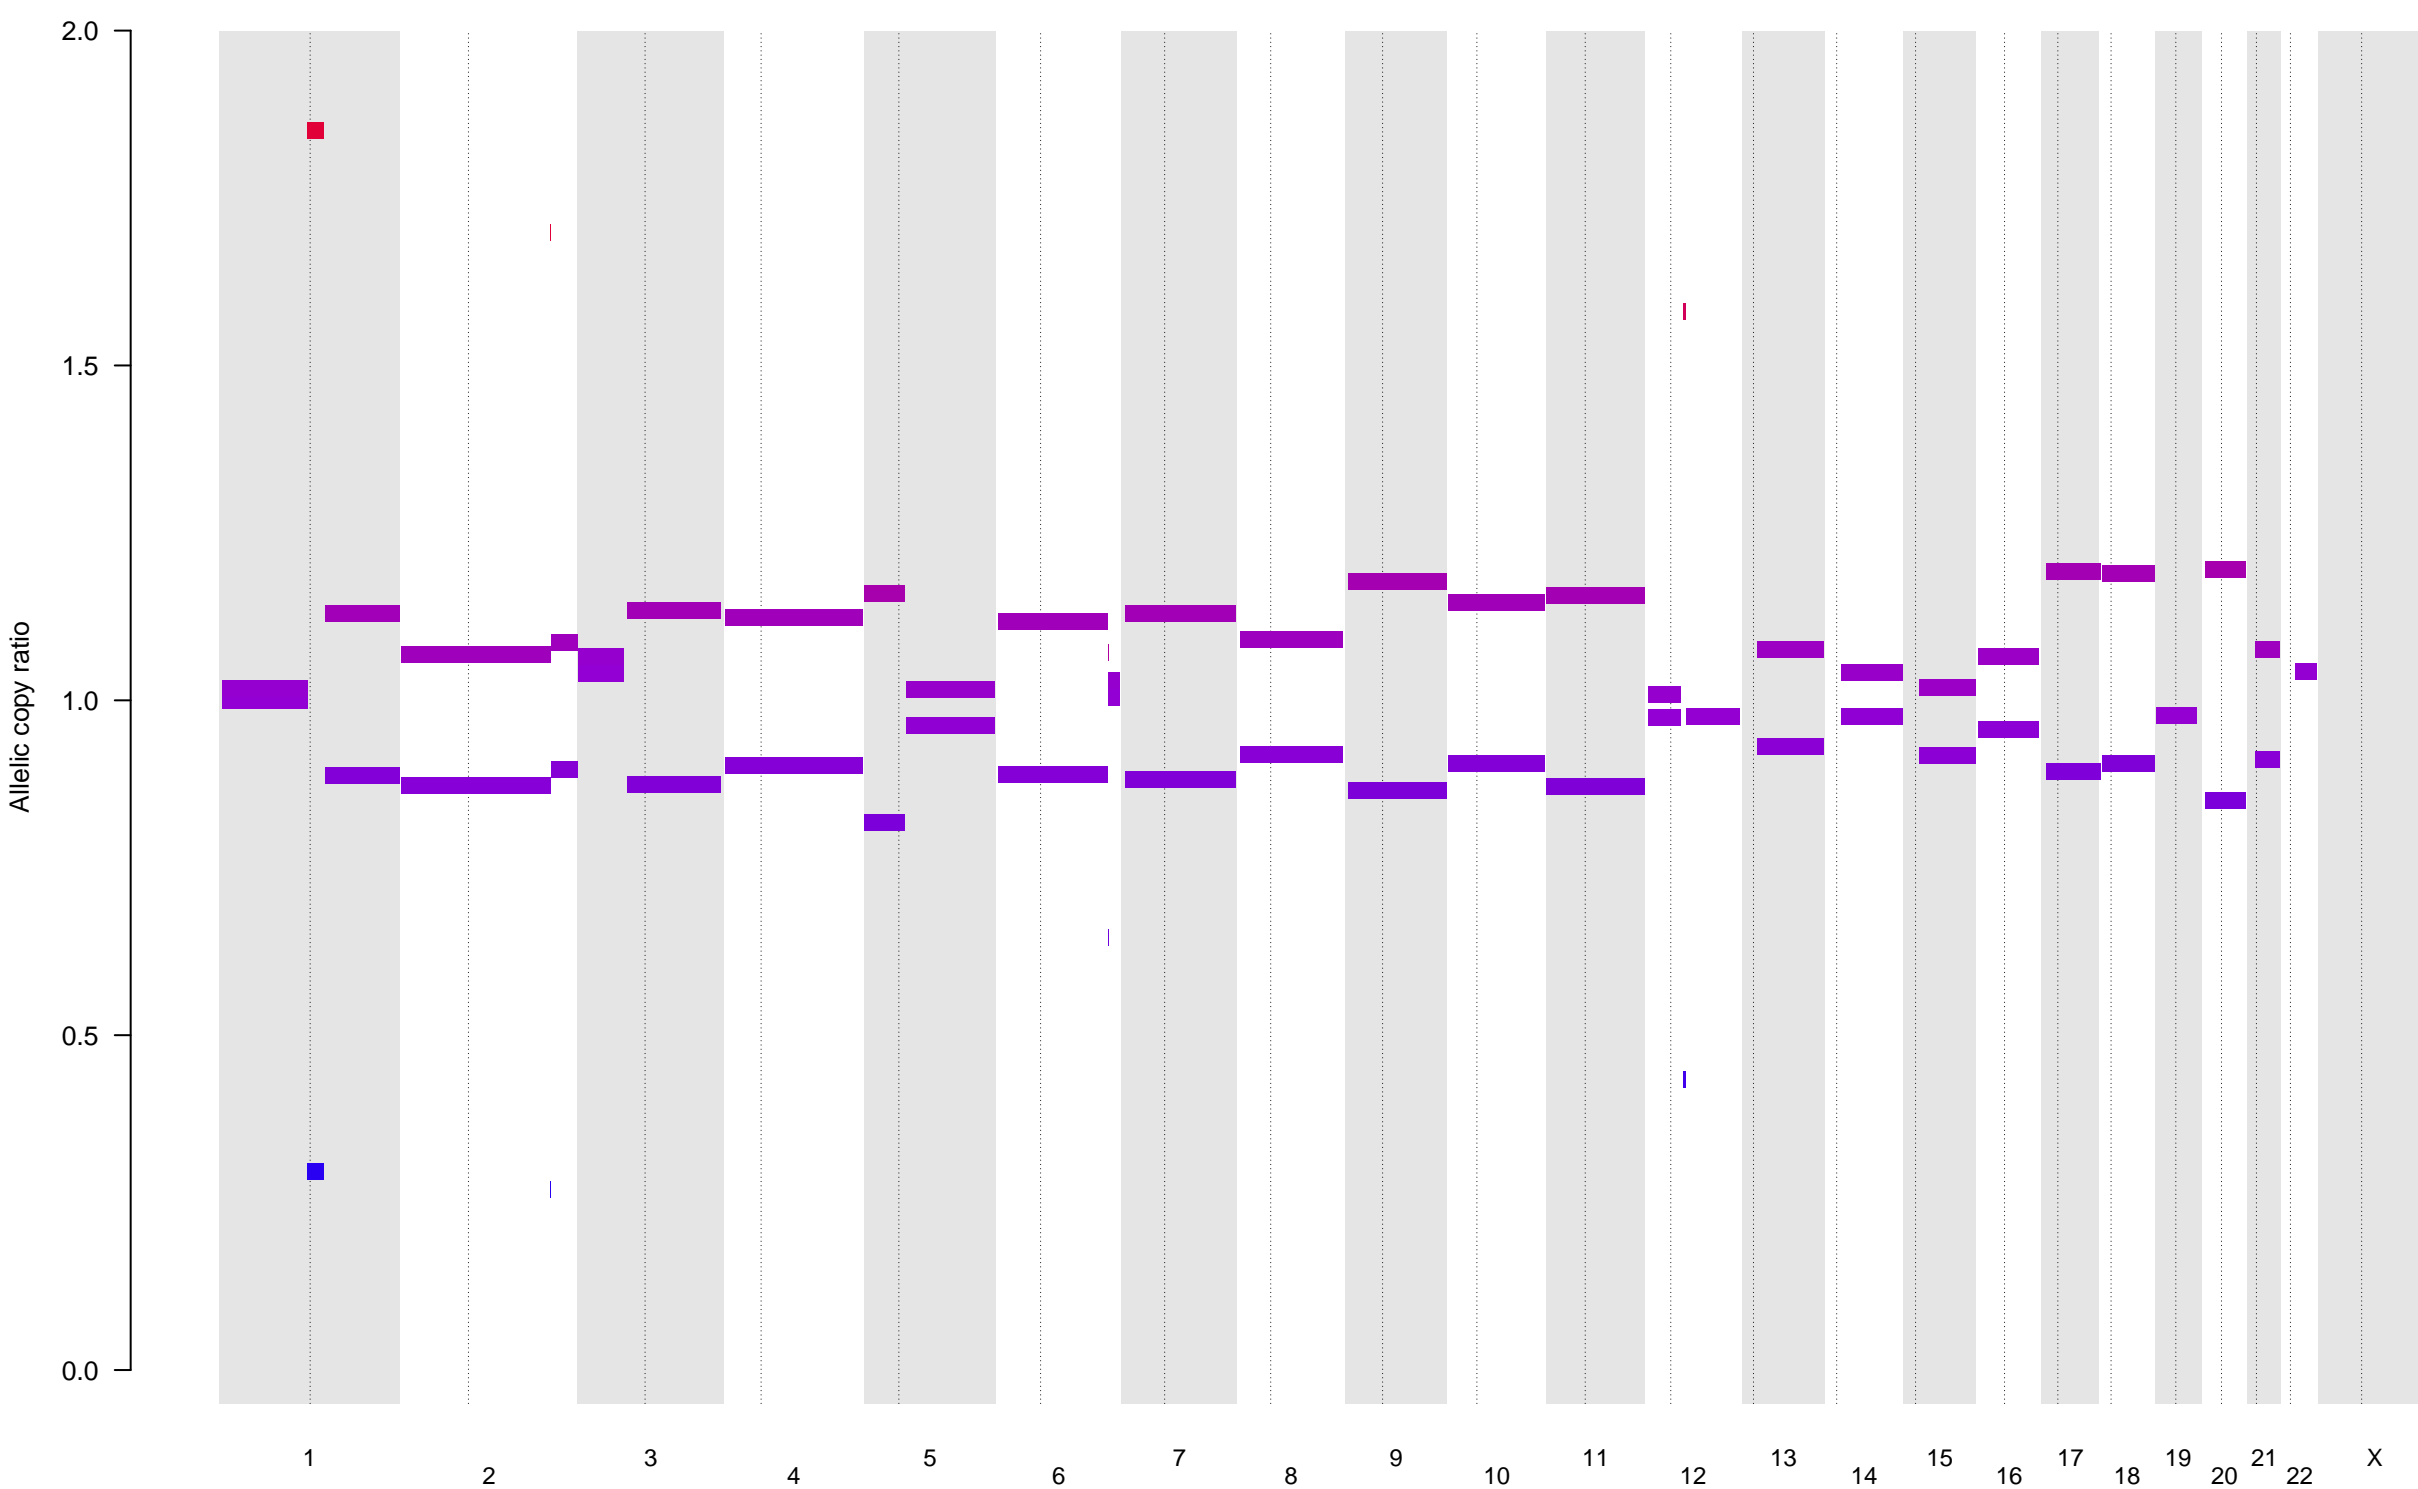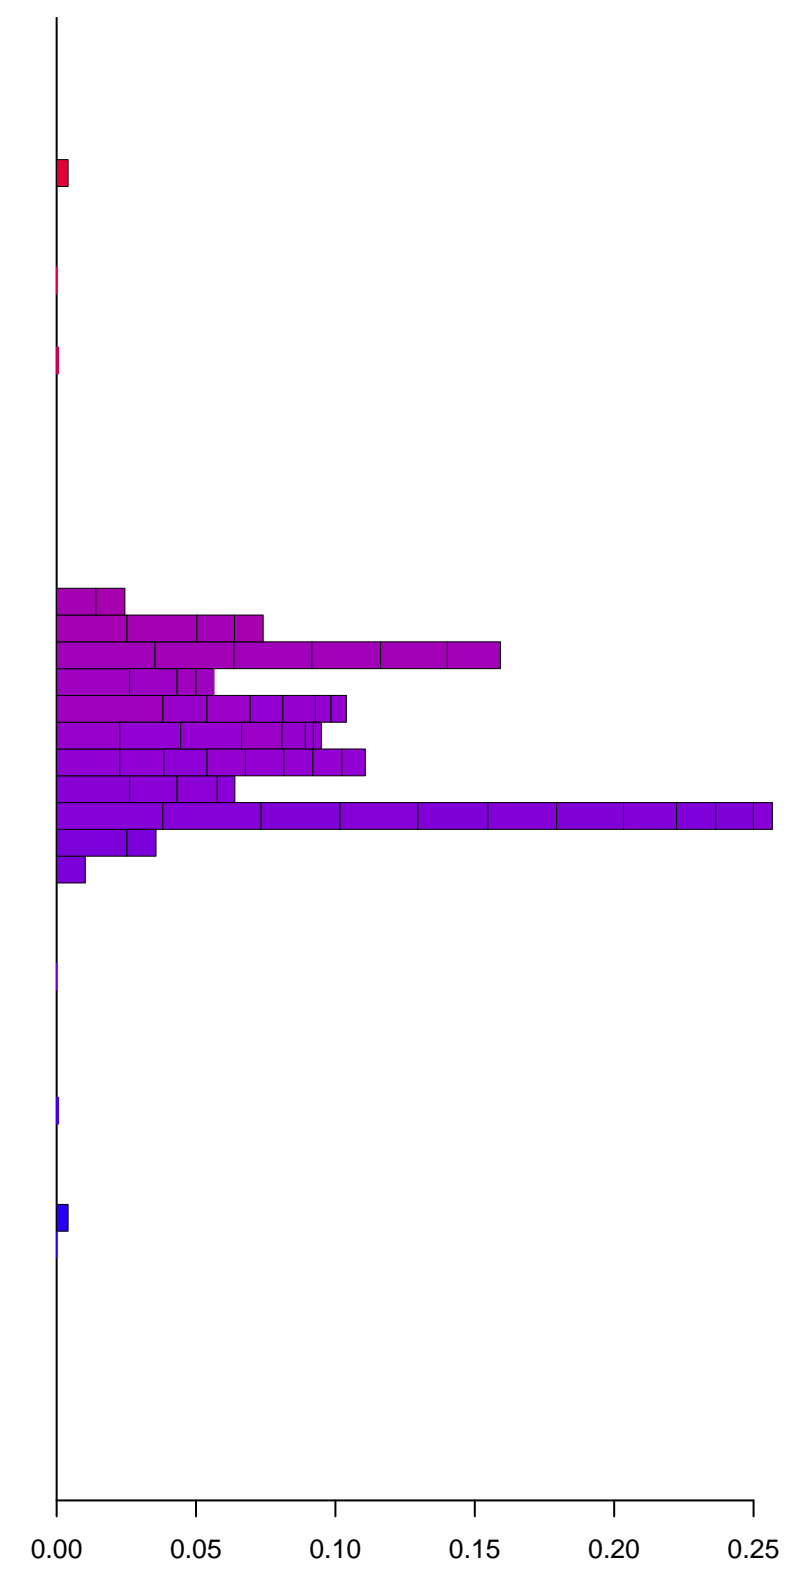

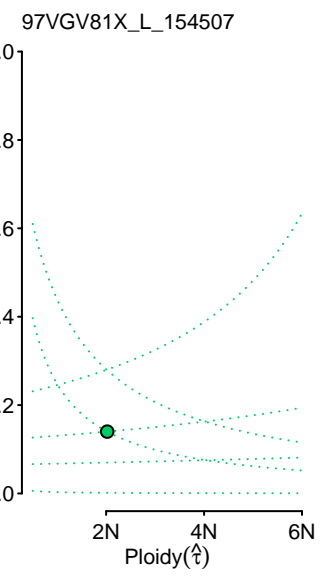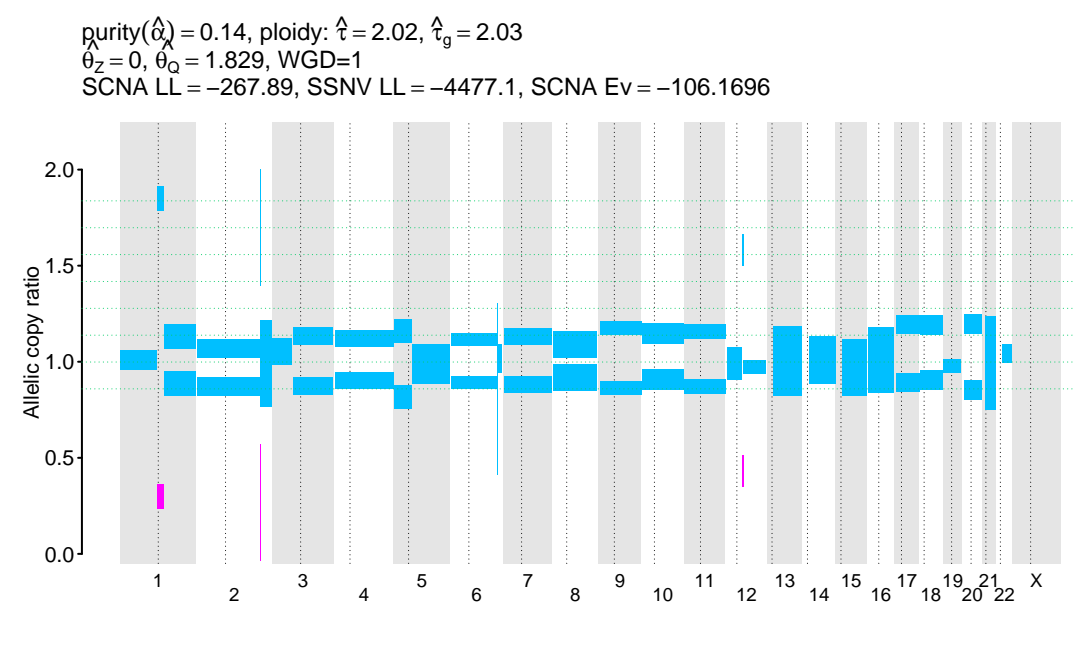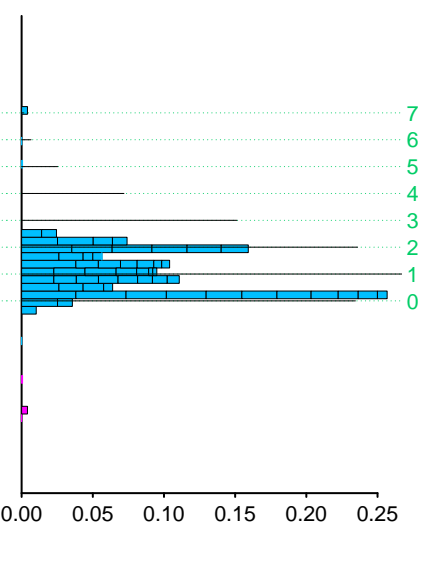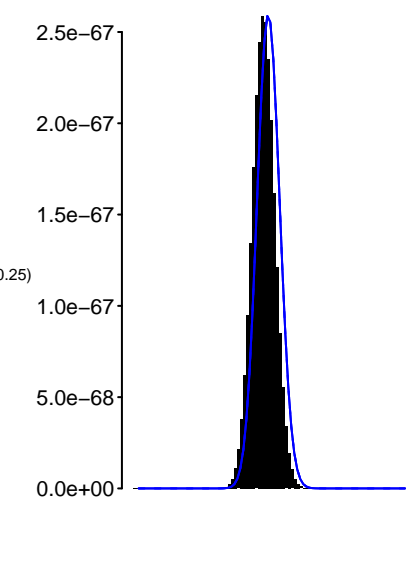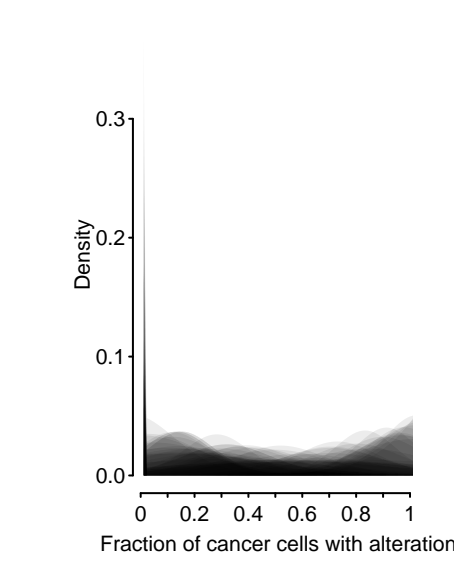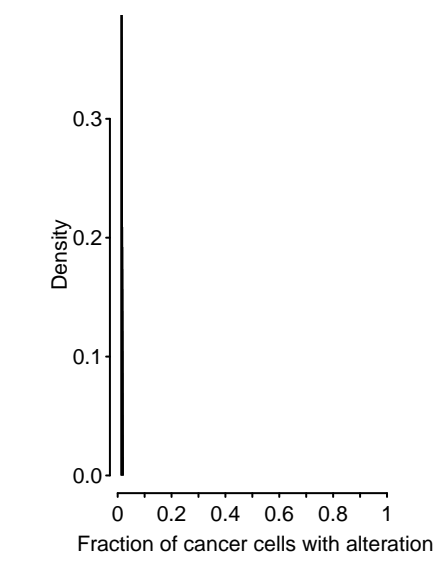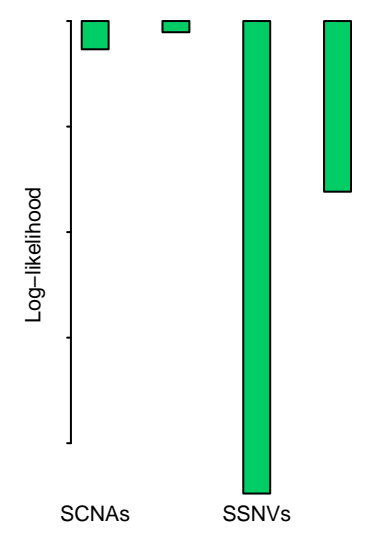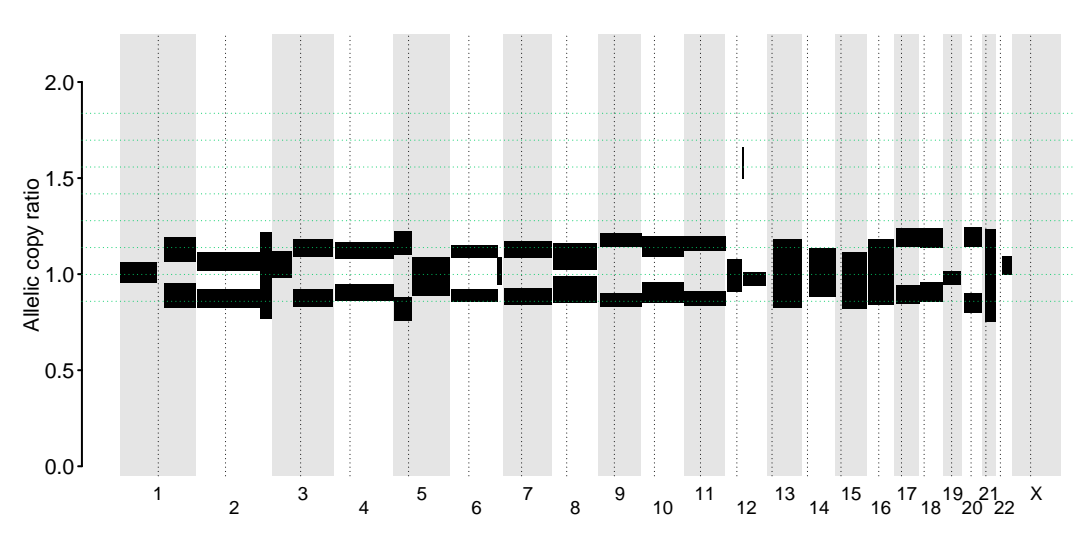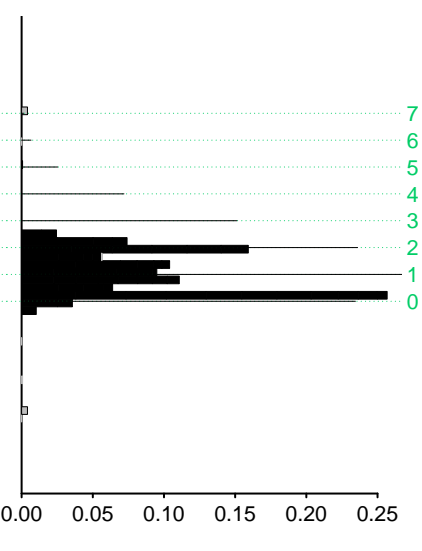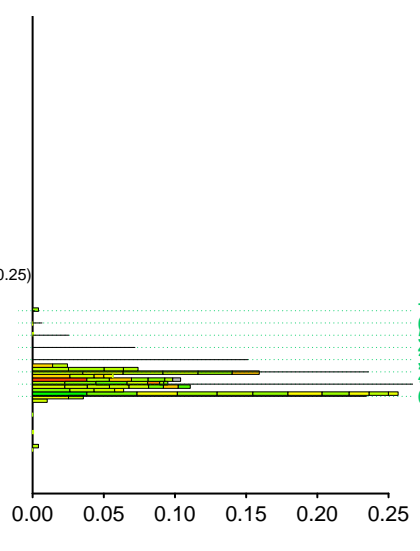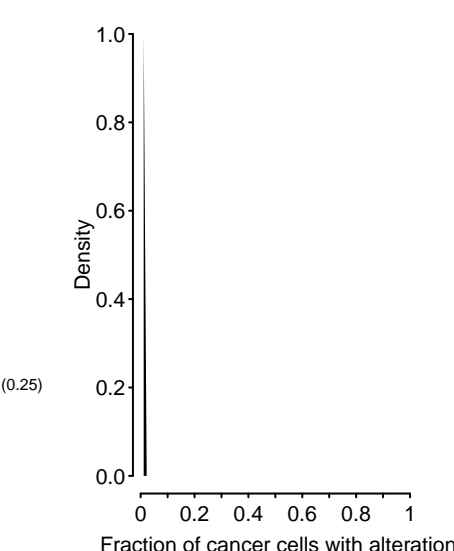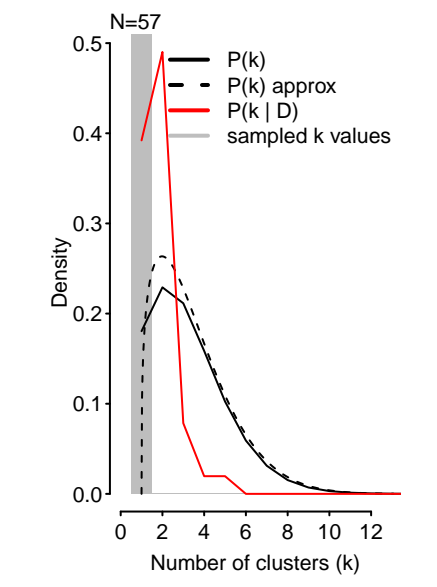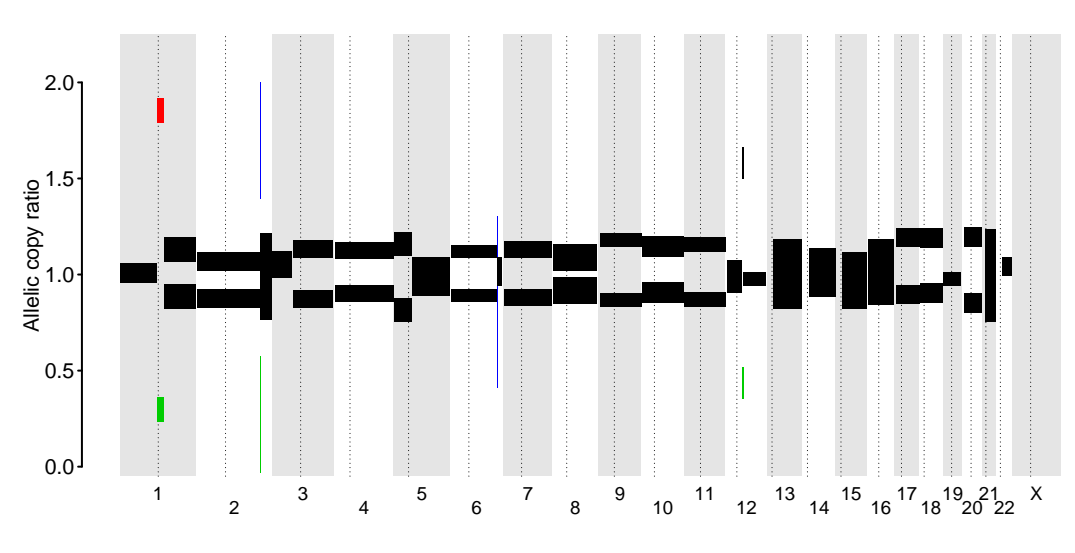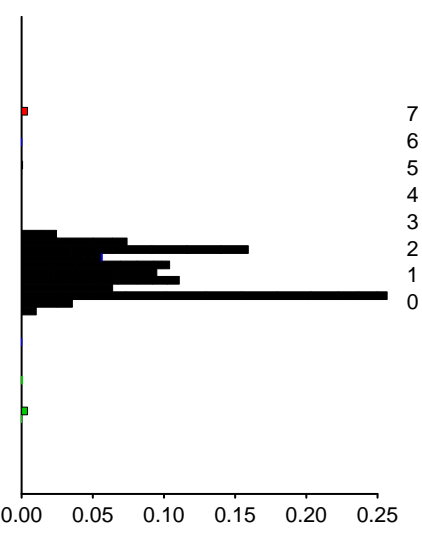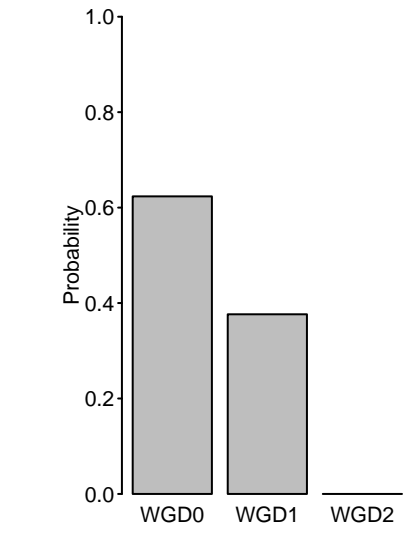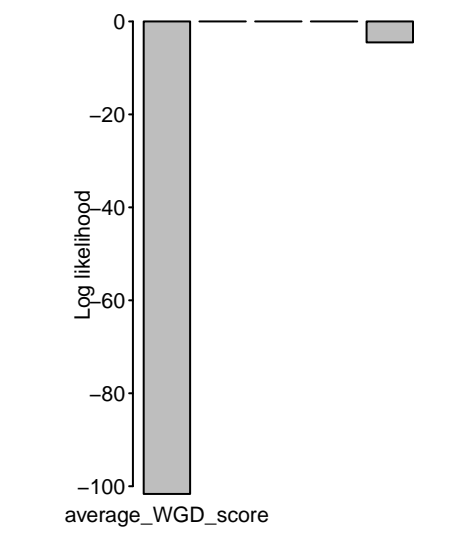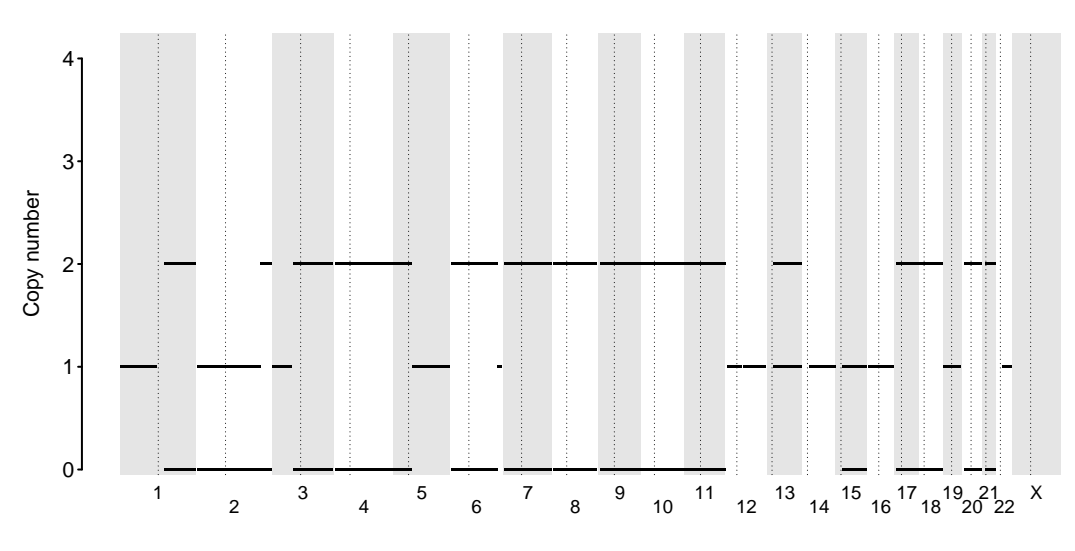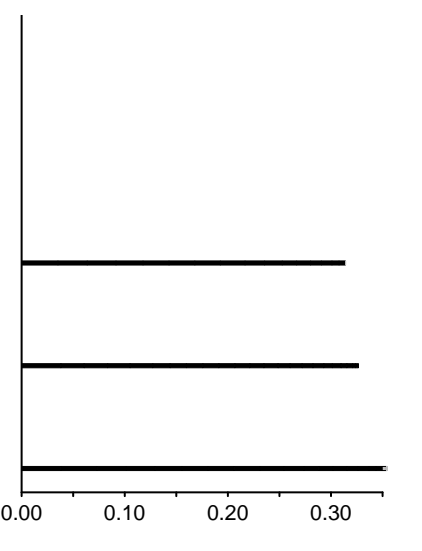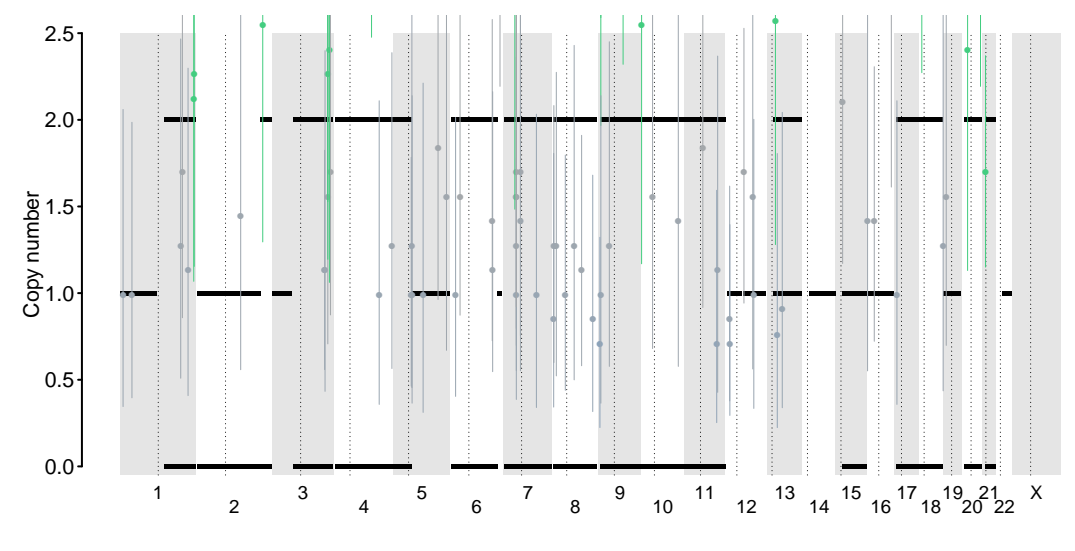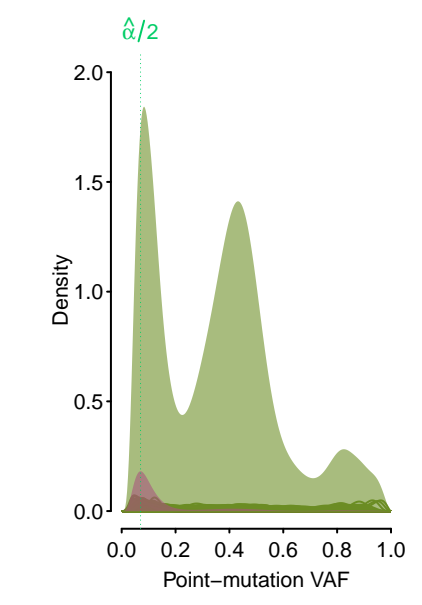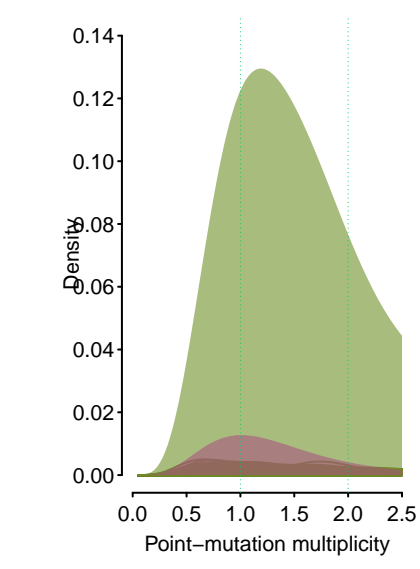

Sample 8

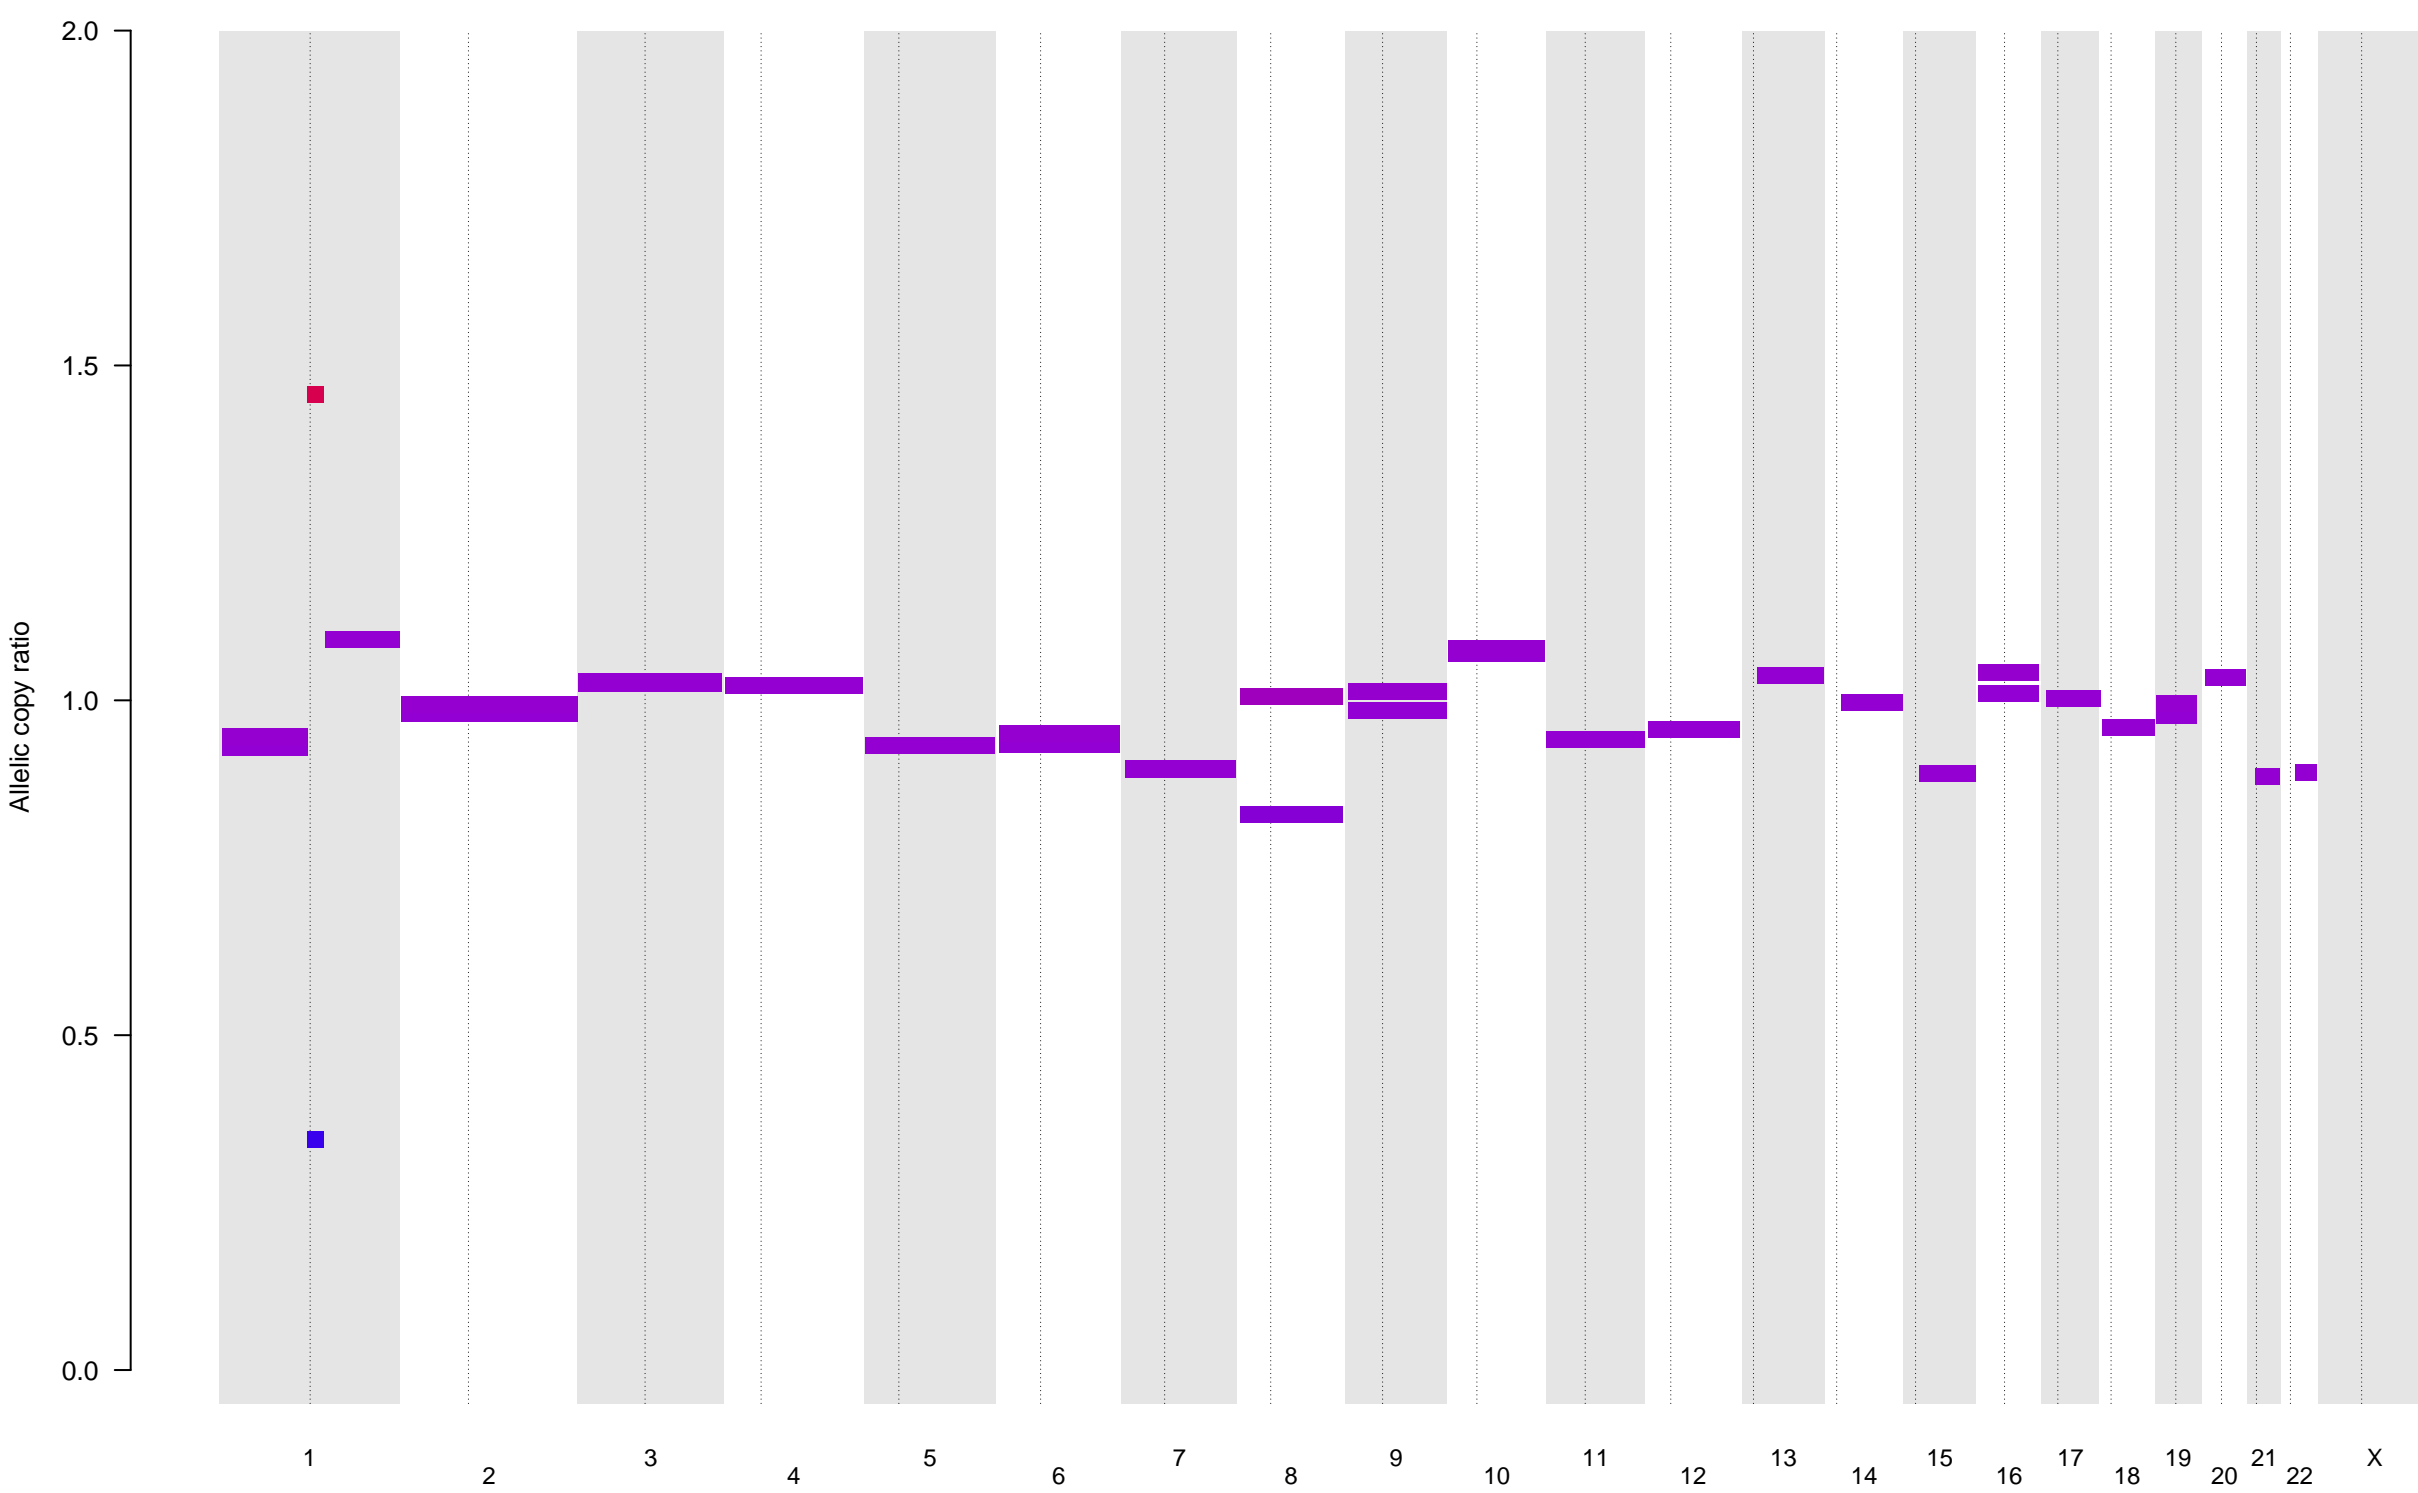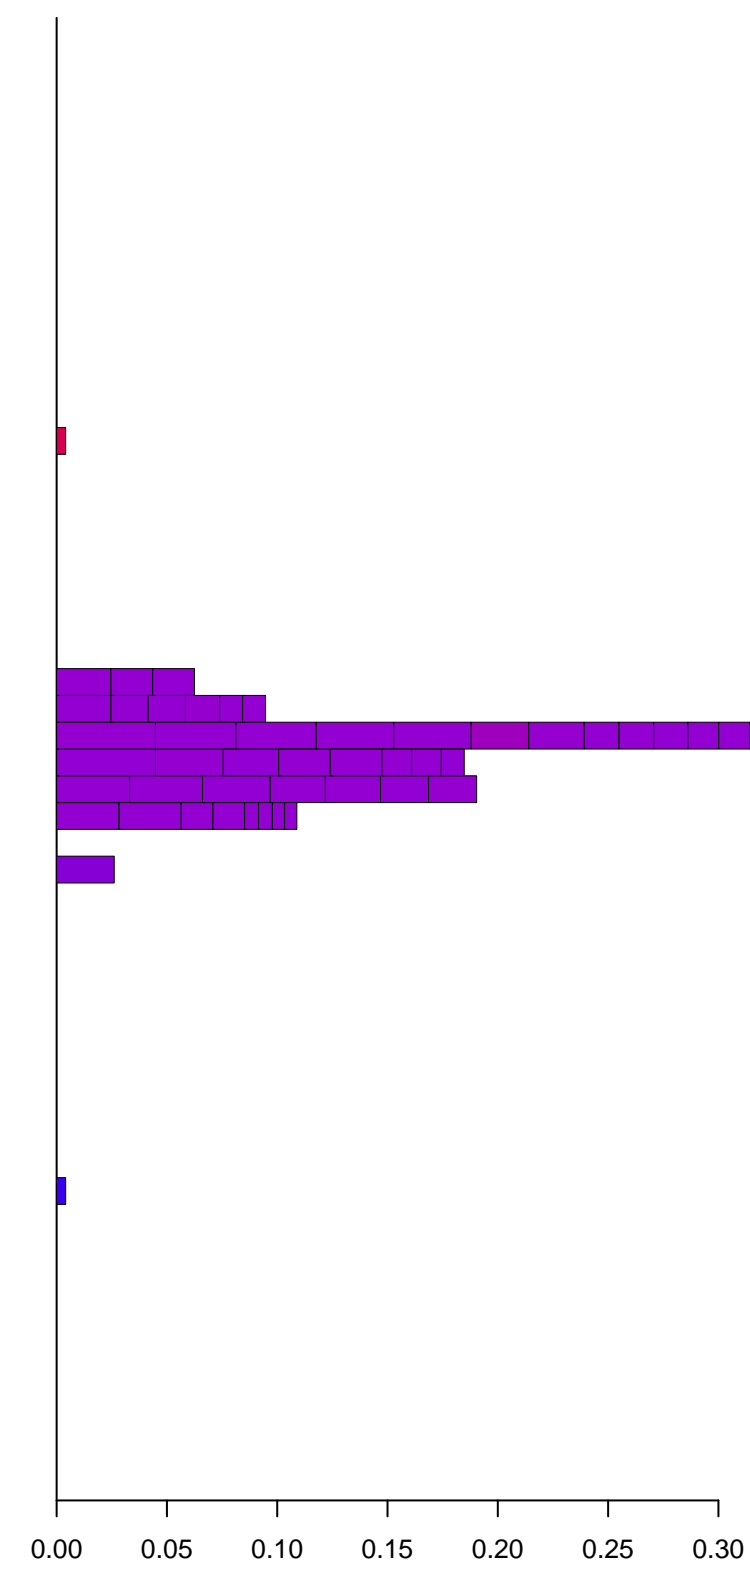

$\hat{\alpha} = 0.27$ , ploidy:  $\hat{\tau} = 2.09$ ,  $\hat{\tau}_g = 1.97$   
 $\theta_z = 0.12$ ,  $\theta_G = 1.197$ , WGD=0  
 SCNA LL = -213.15, SSNV LL = -2731.38, SCNA Ev = -64.87275

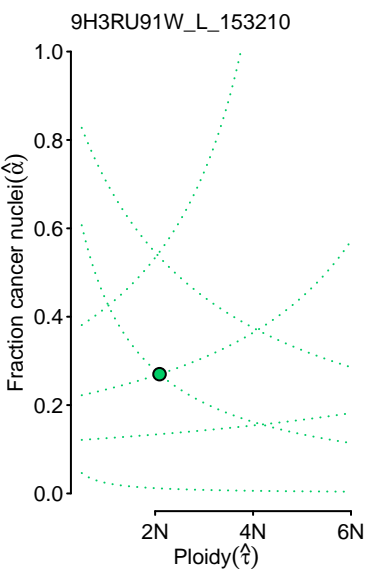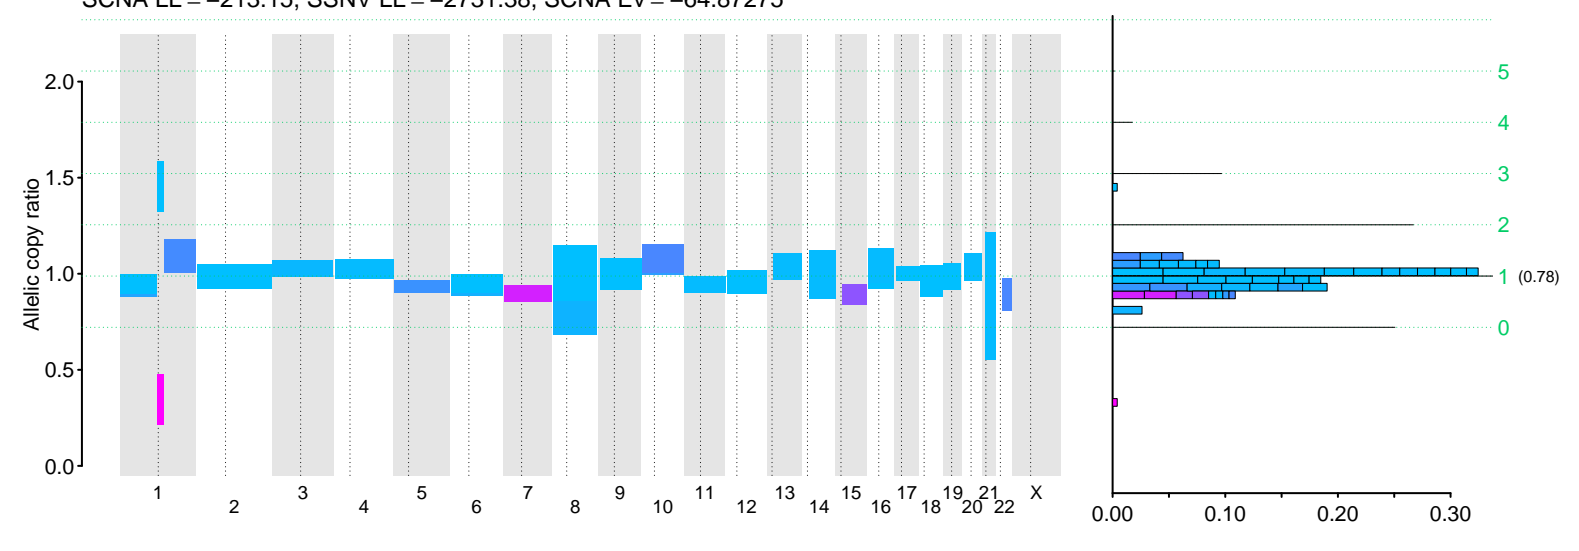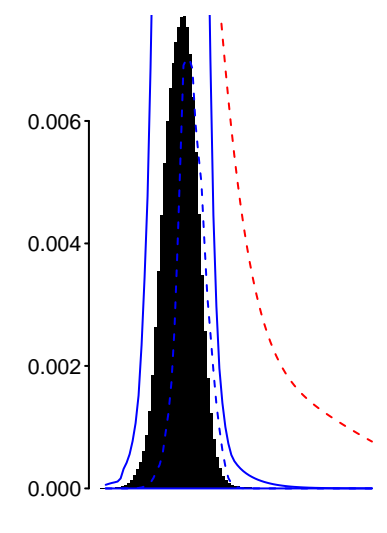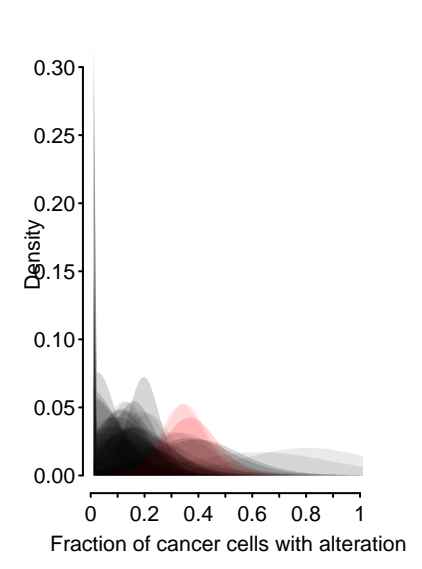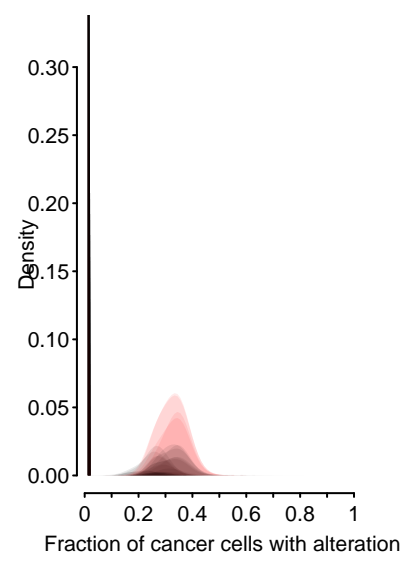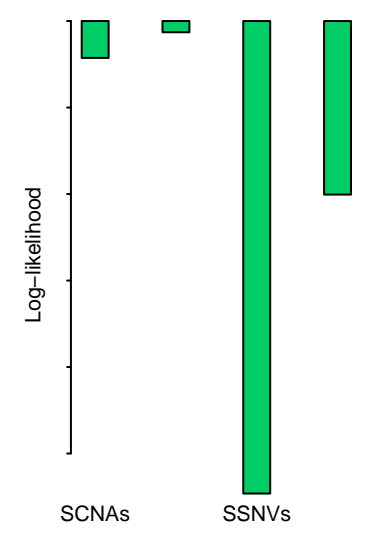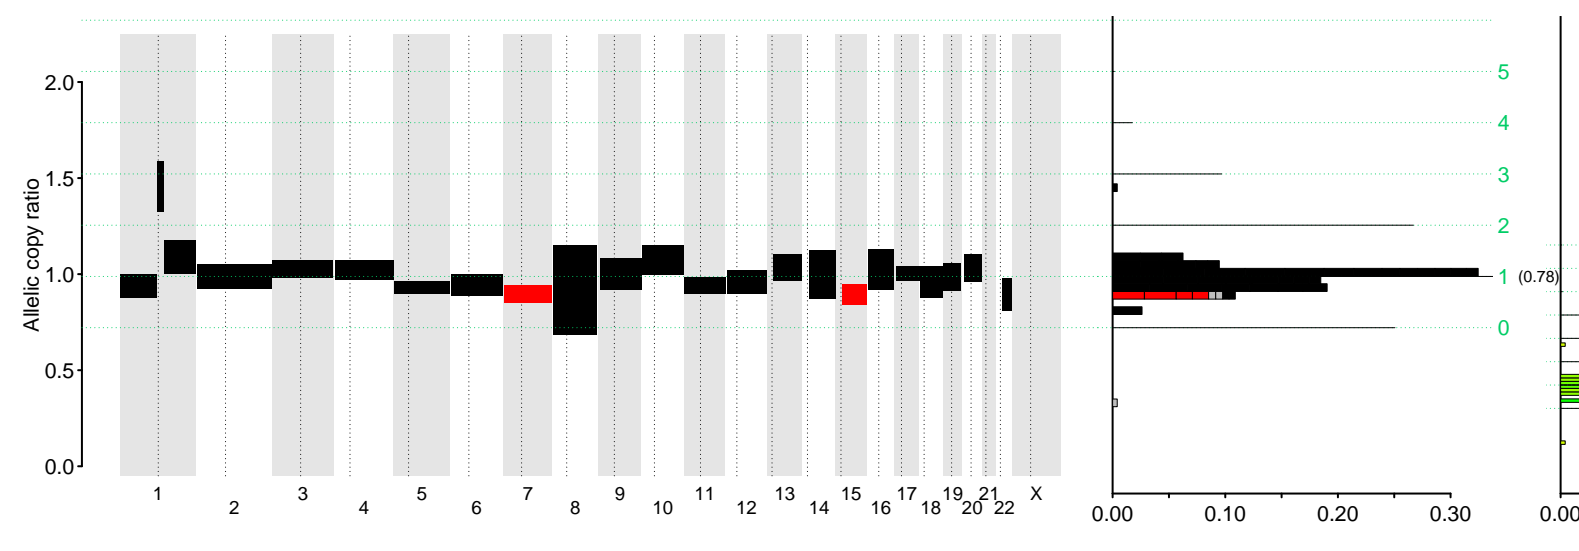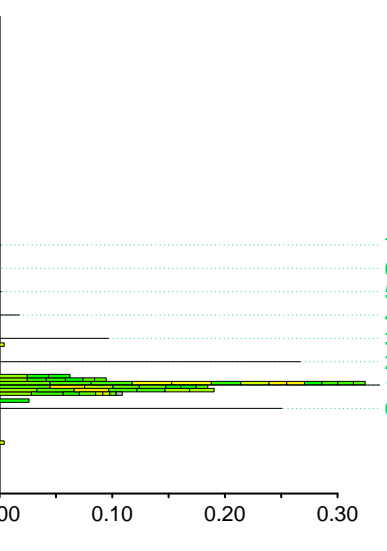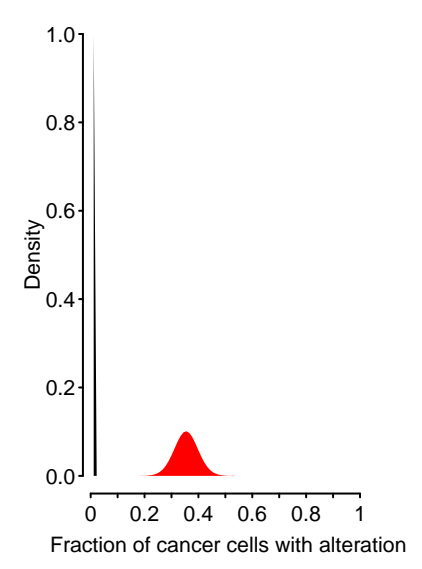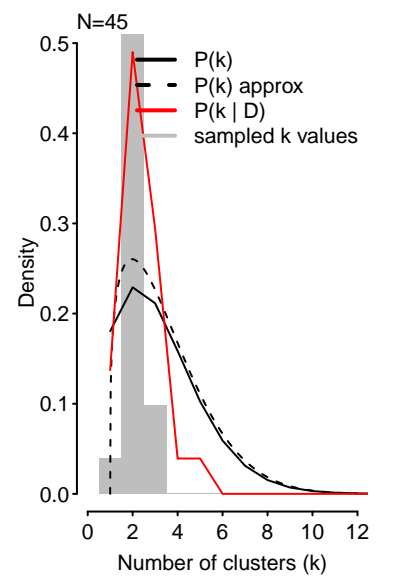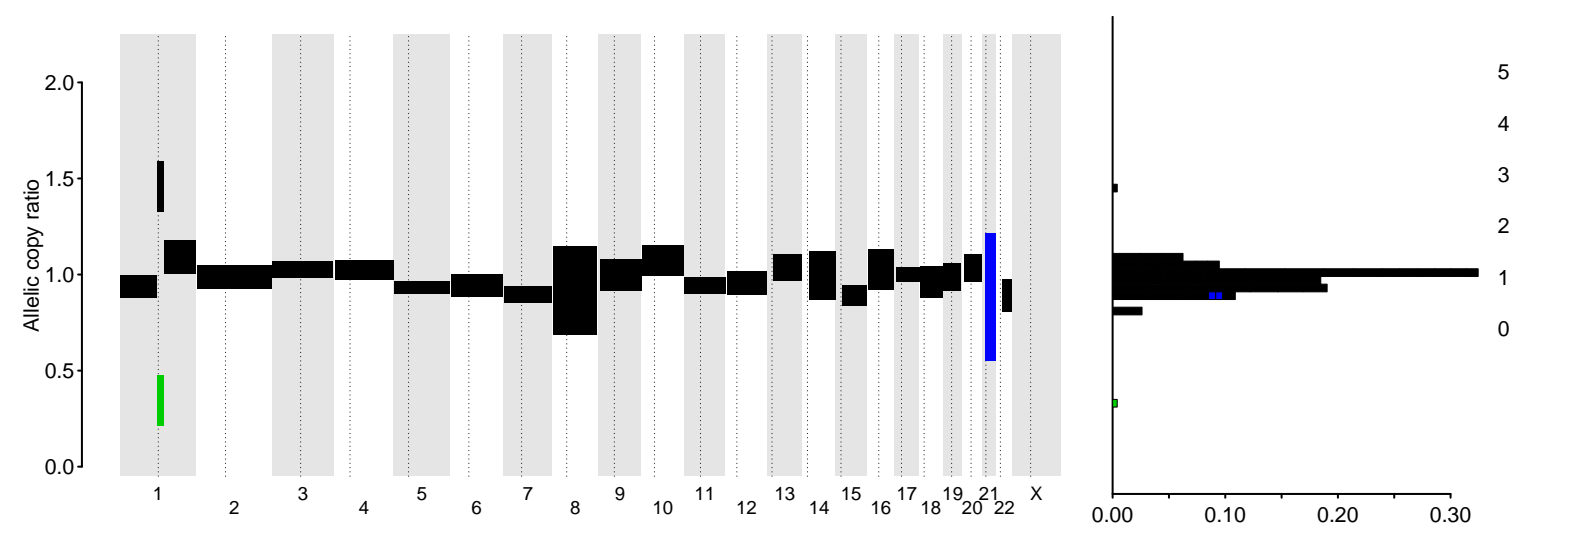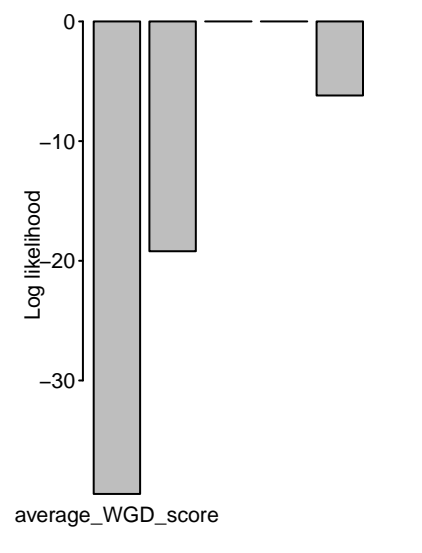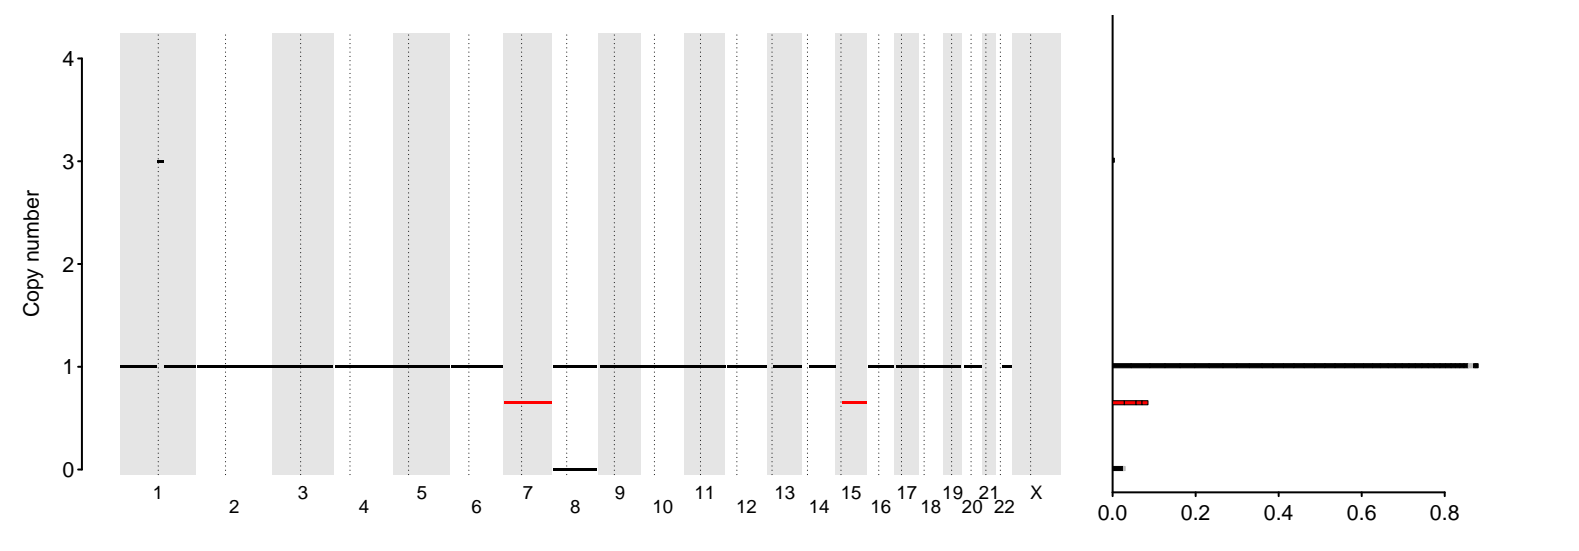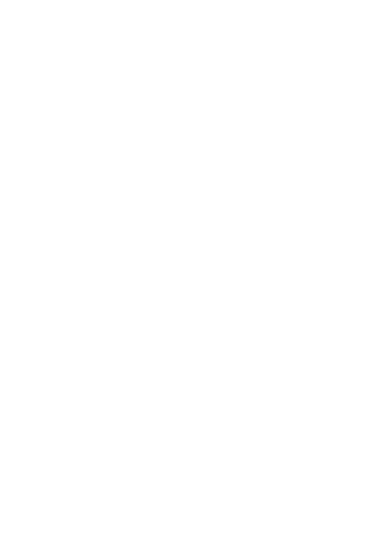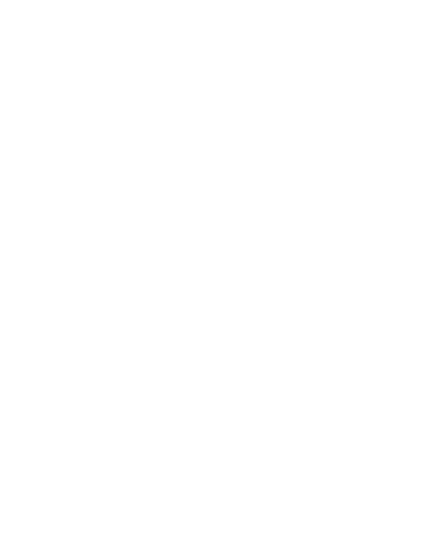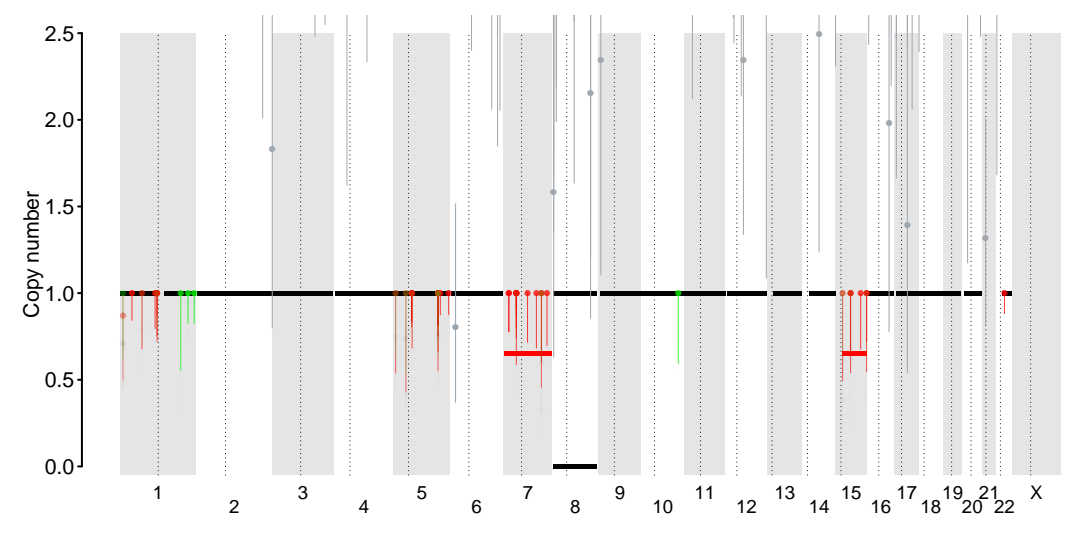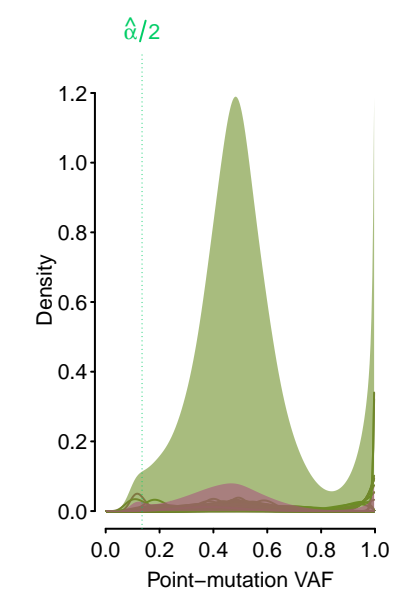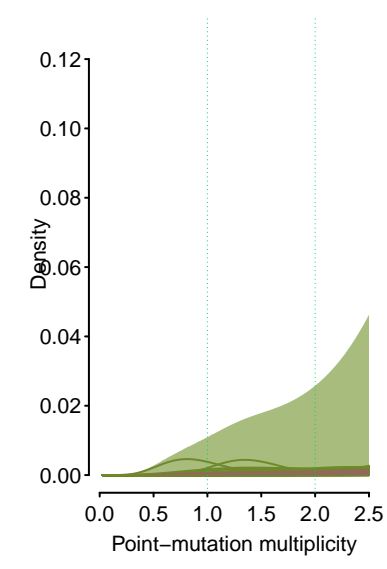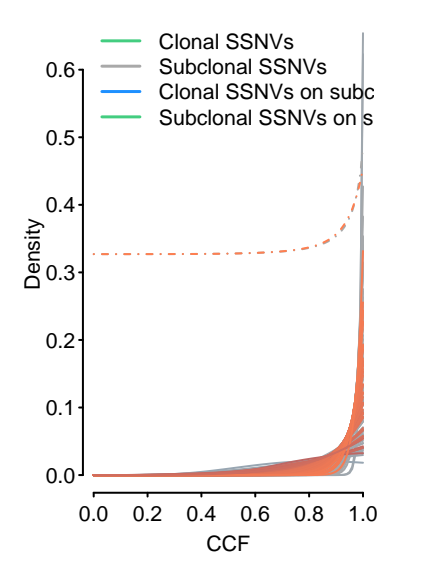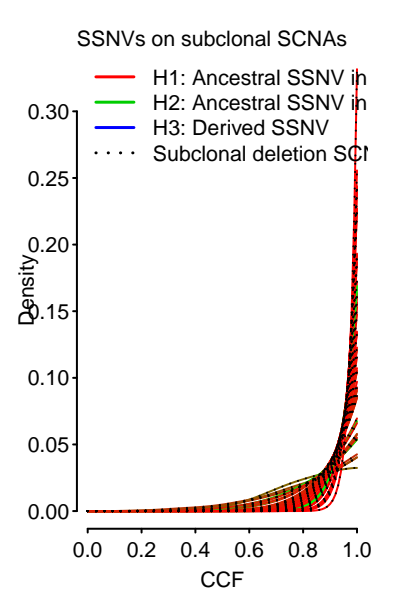

Sample 9

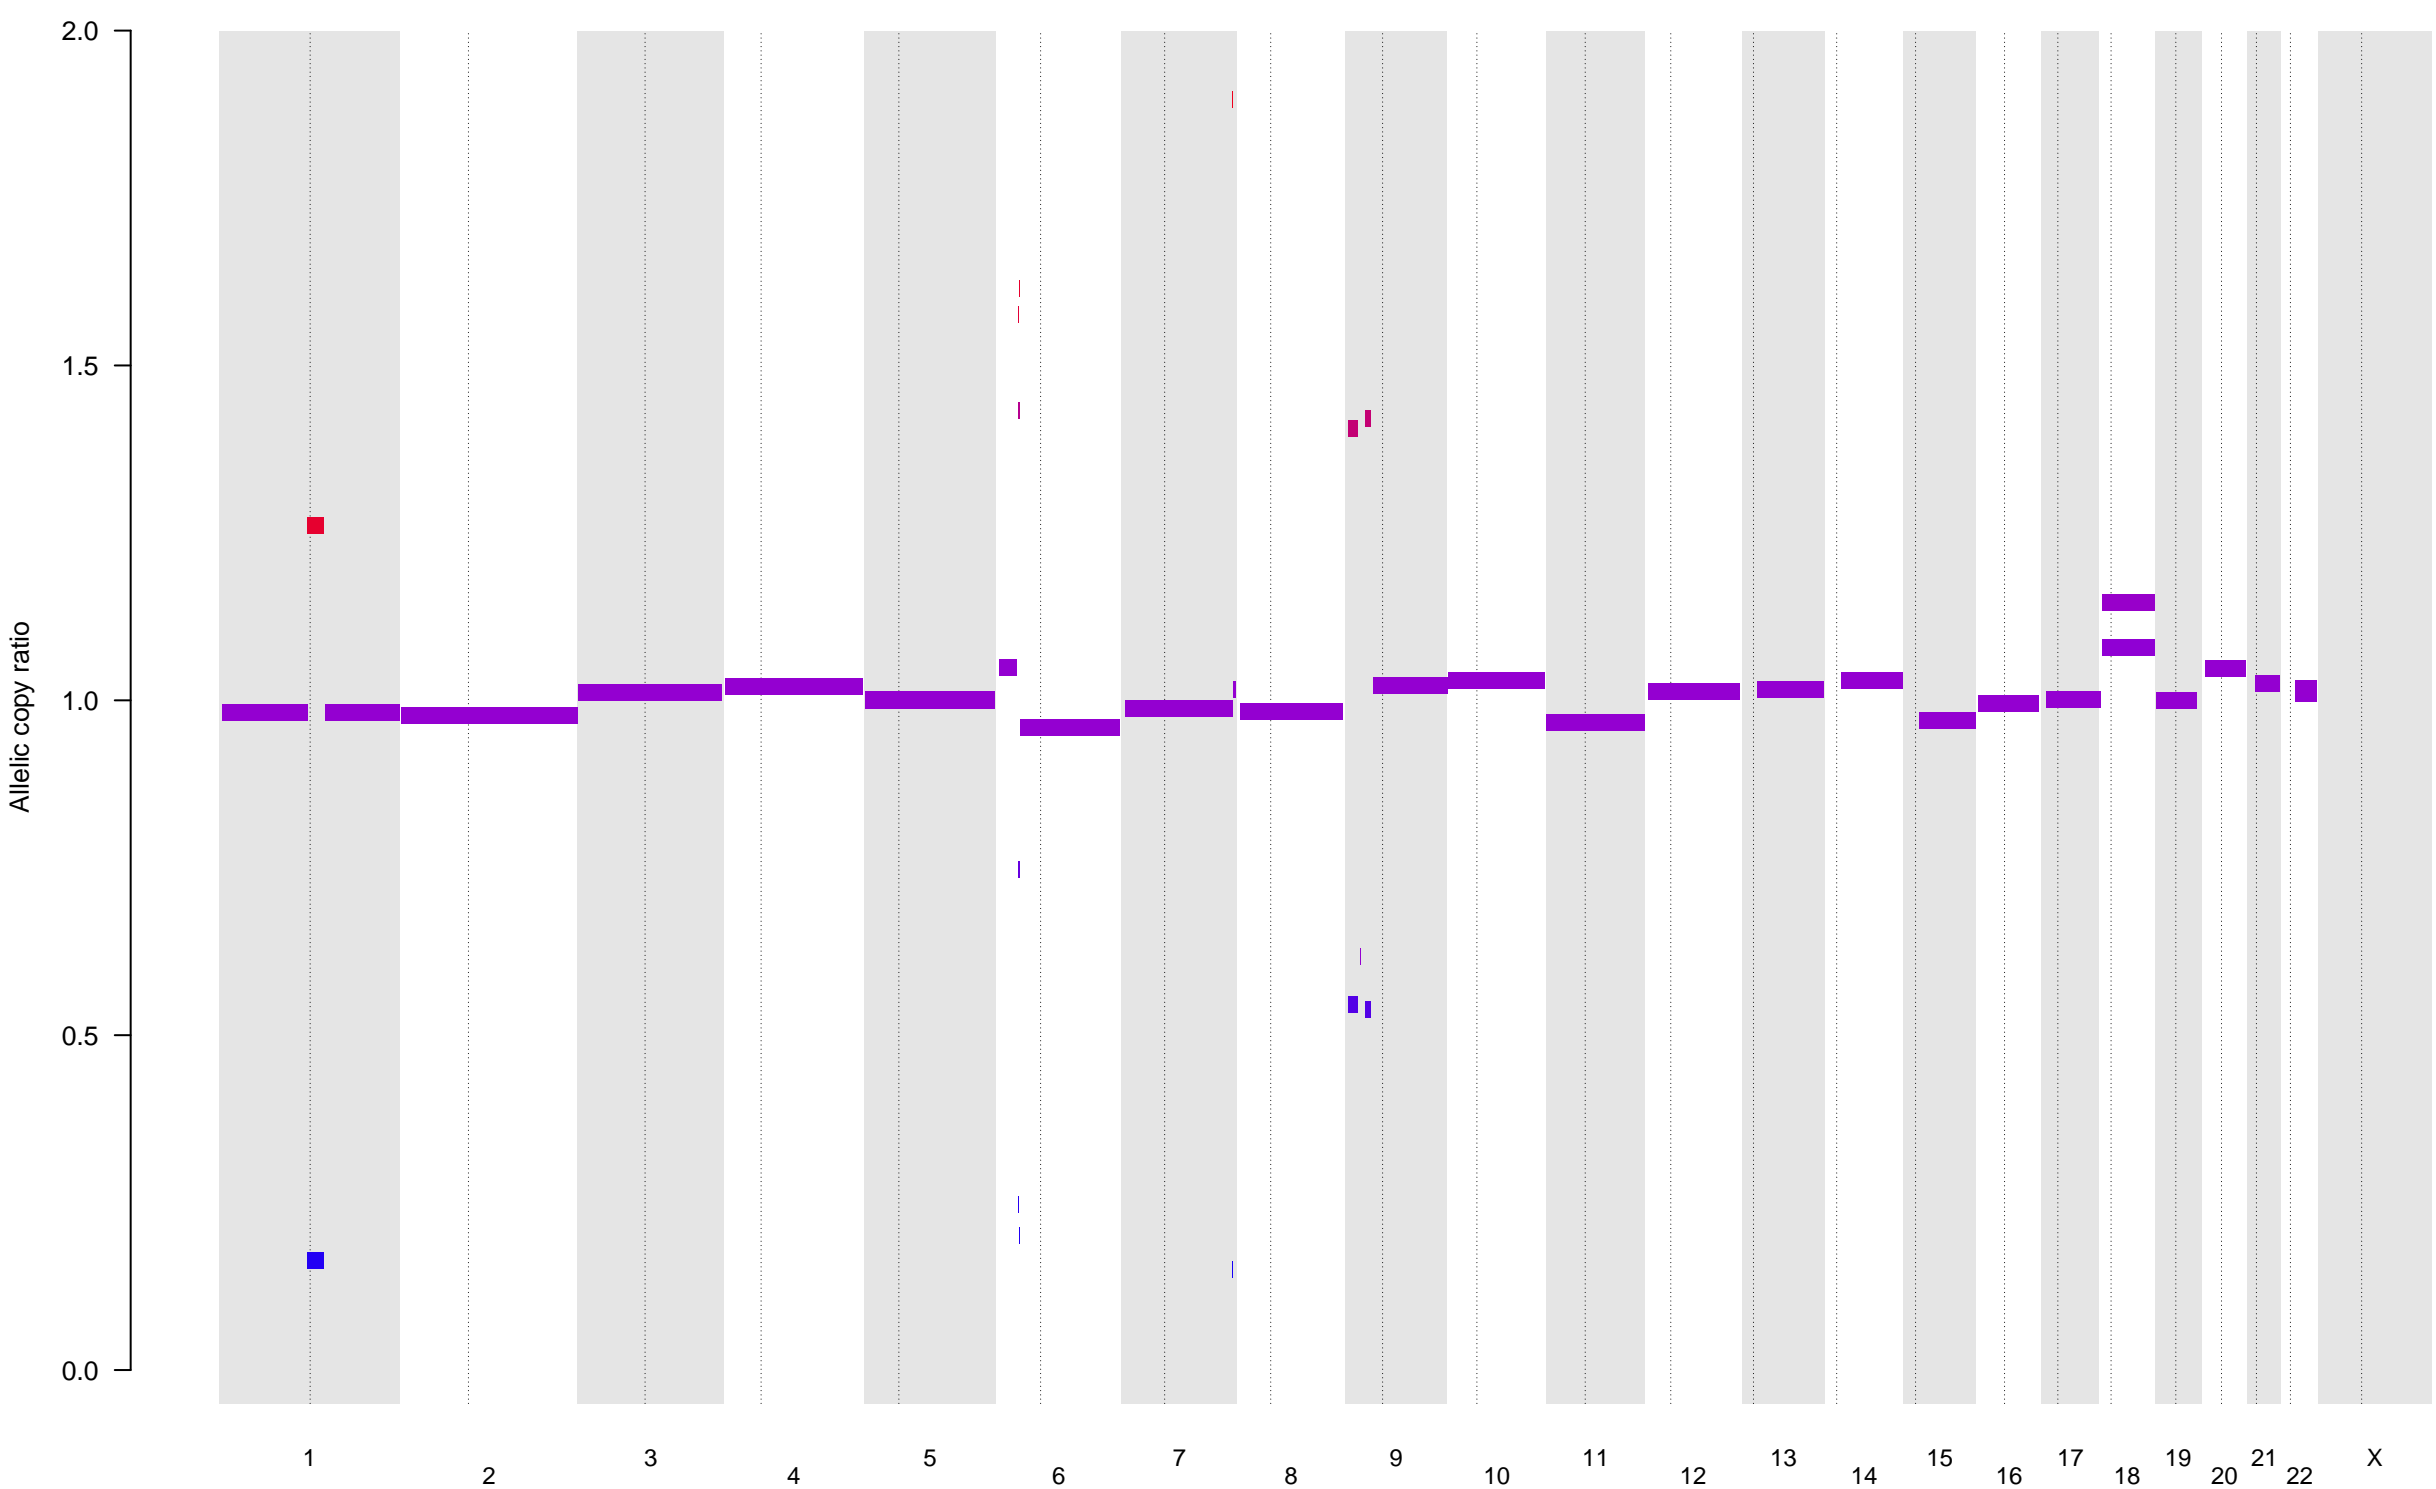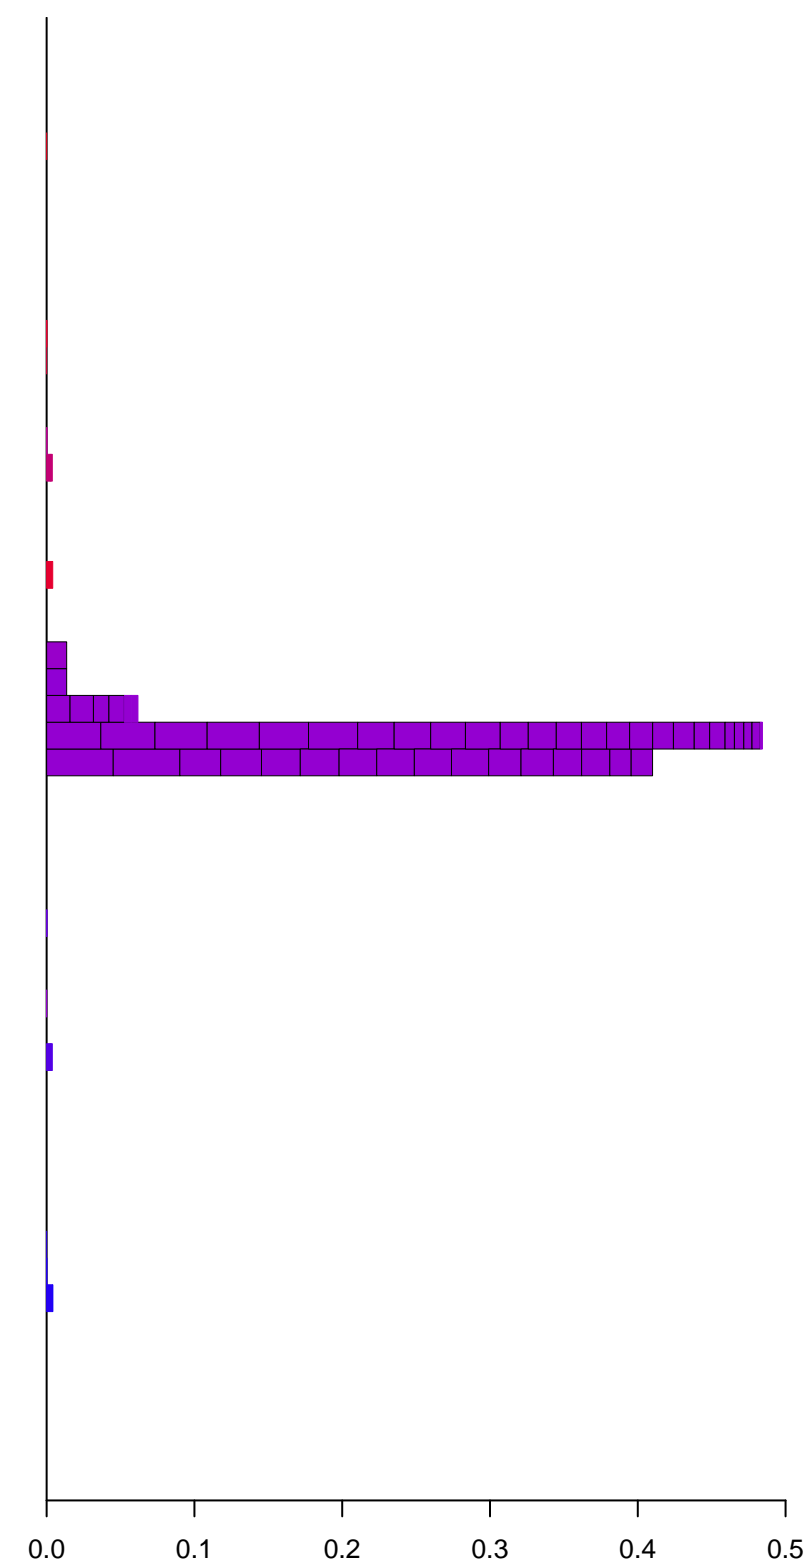



$\hat{\alpha} = 0.5$ , ploidy:  $\hat{t} = 2.01$ ,  $\hat{t}_g = 2$   
 $\hat{\theta}_z = 0.02$ ,  $\hat{\theta}_Q = 1.253$ , WGD=0  
 SCNA LL = -199.04, SSNV LL = -5959.72, SCNA Ev = -37.23426

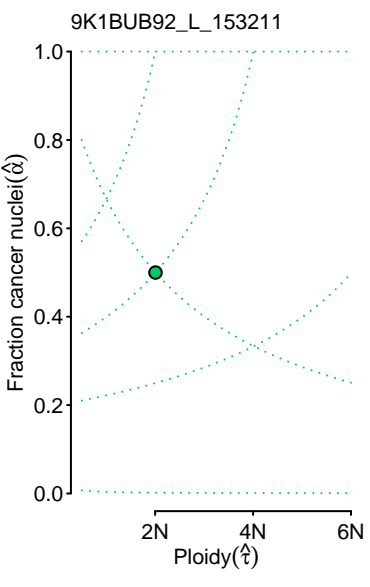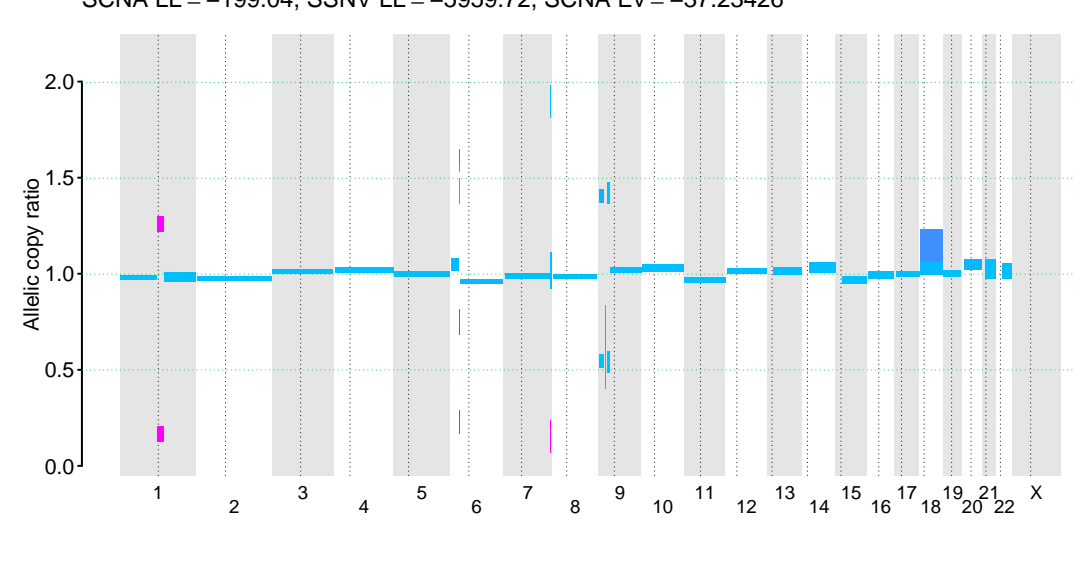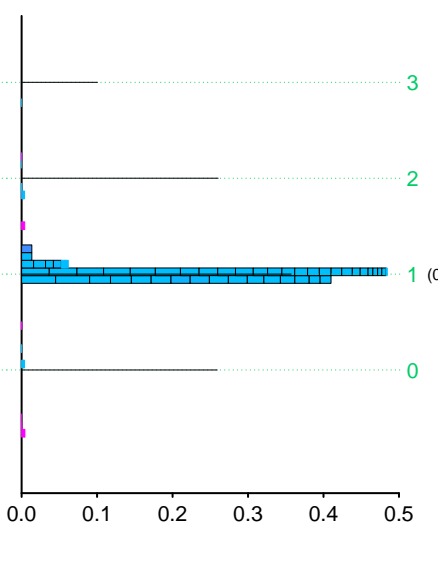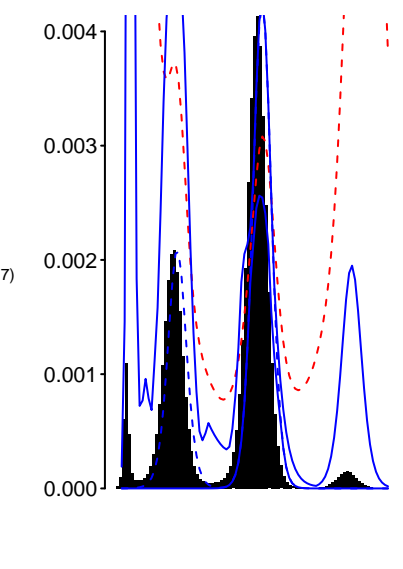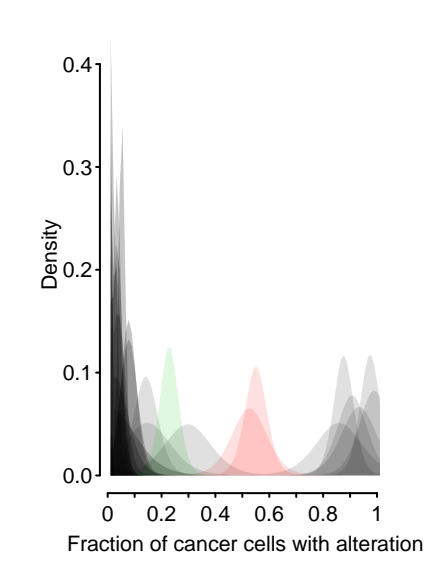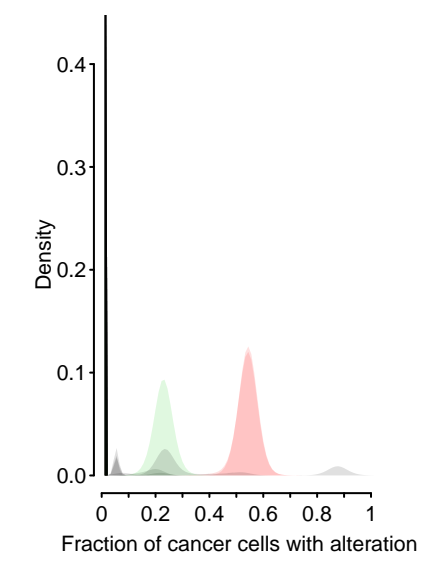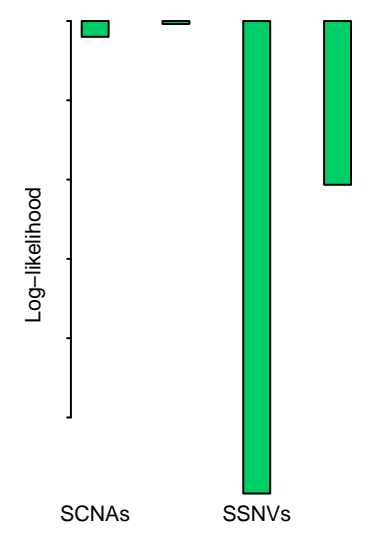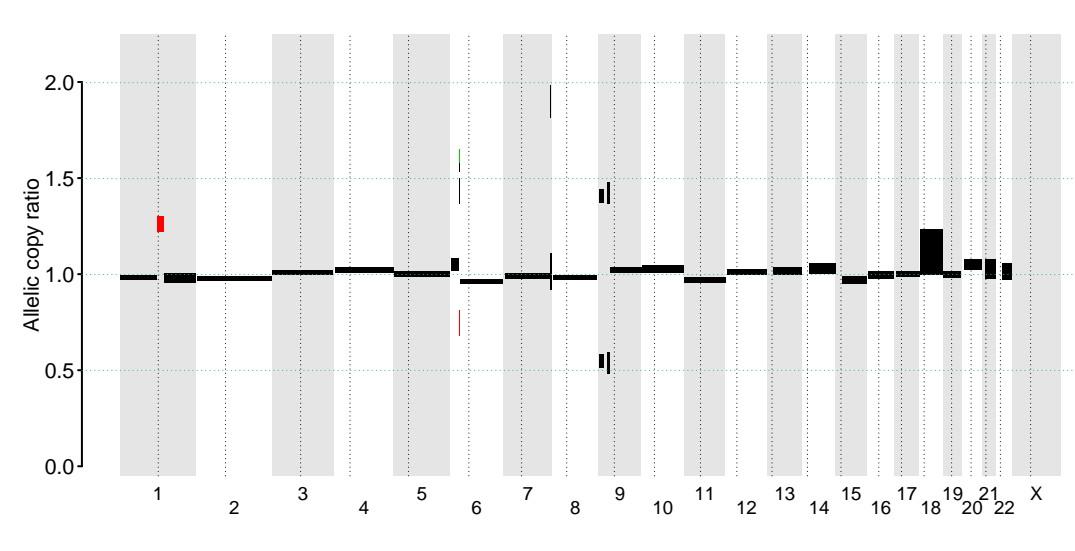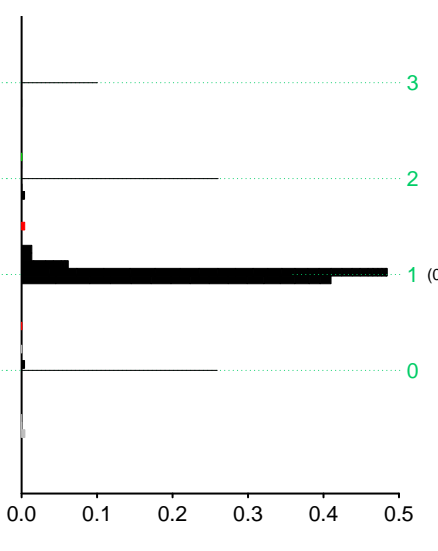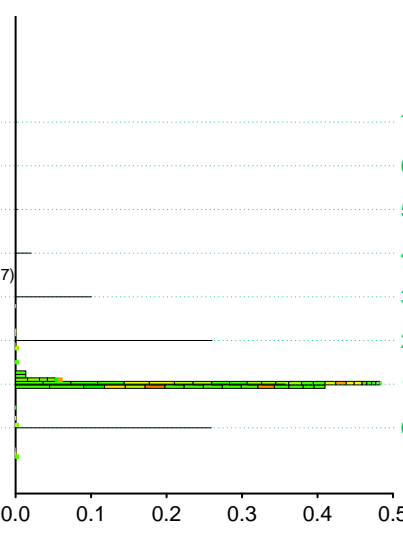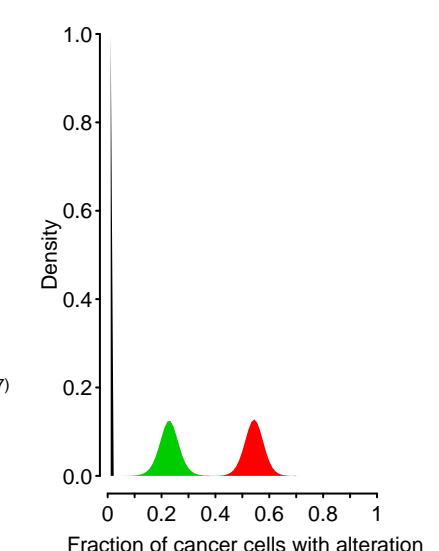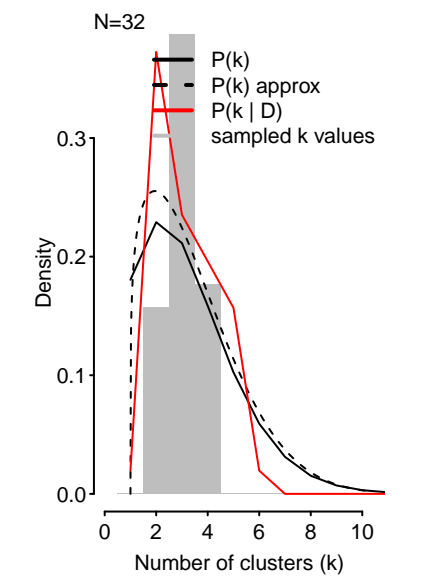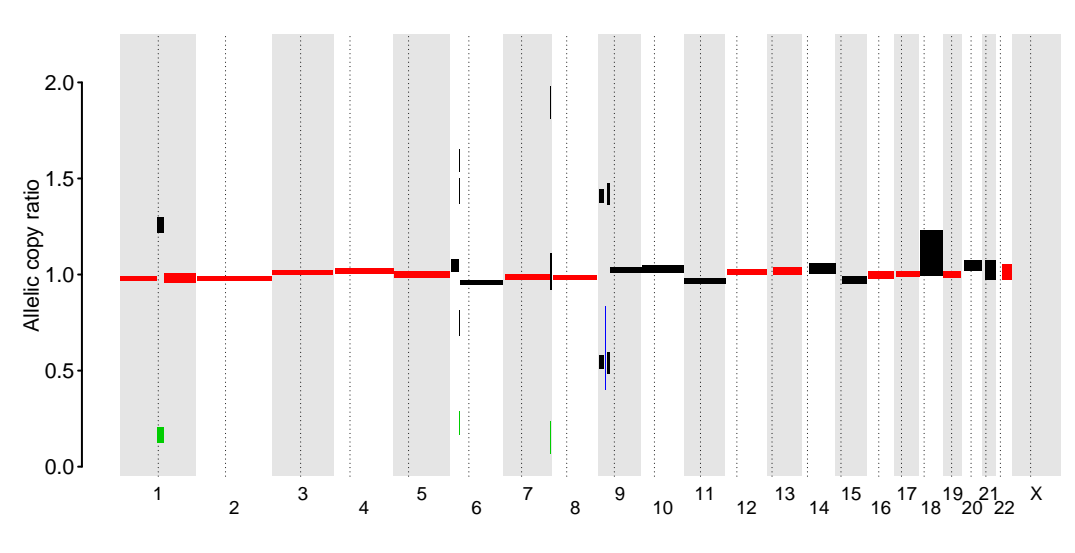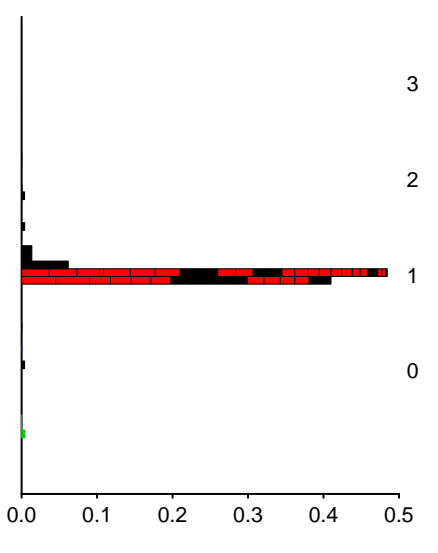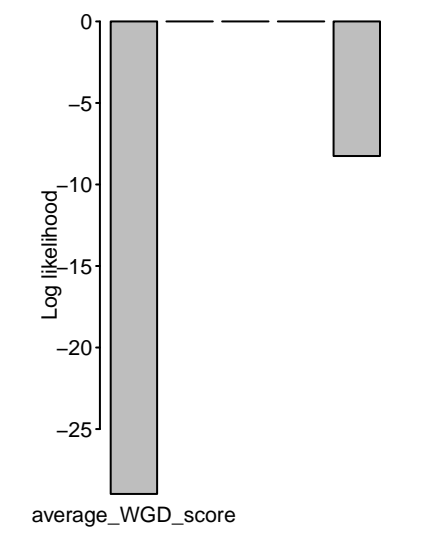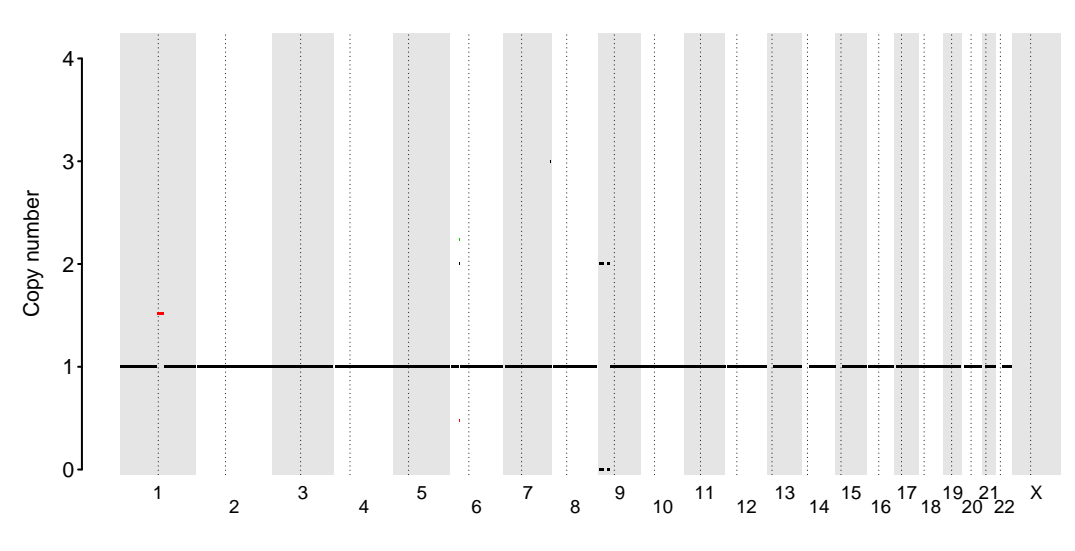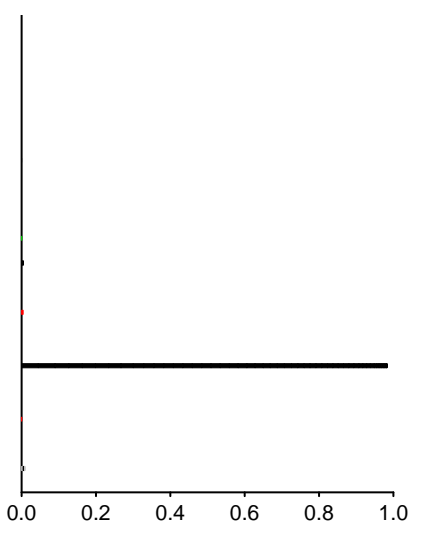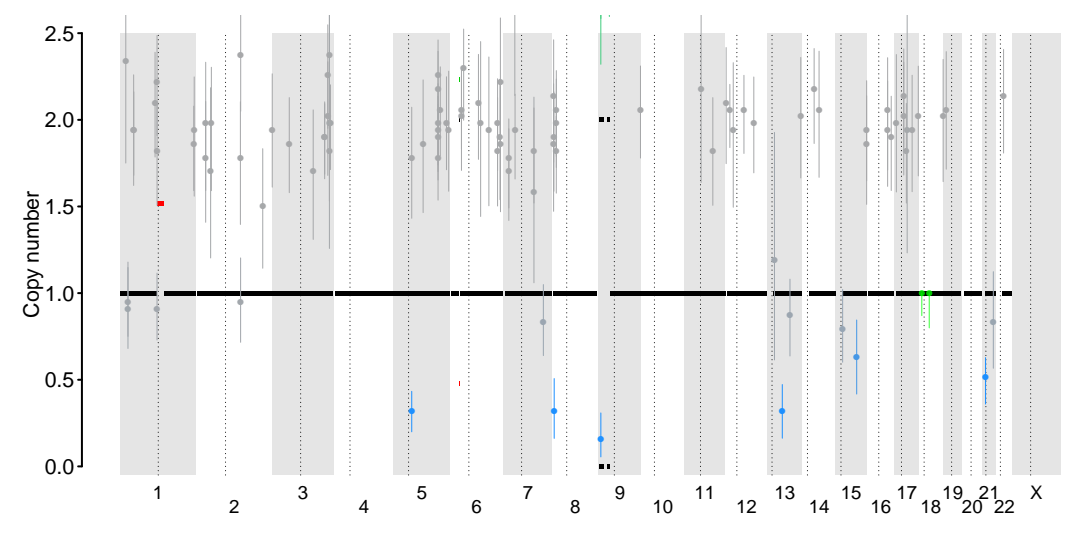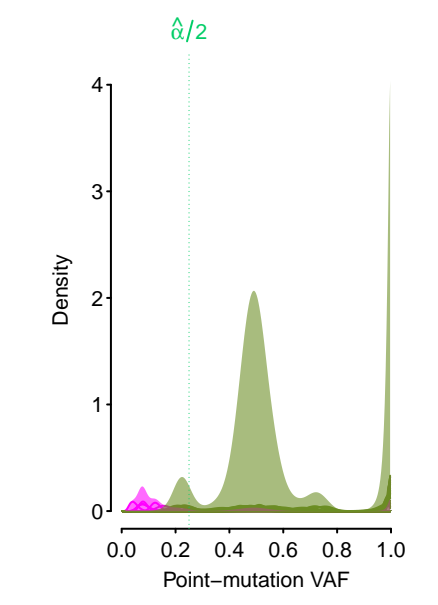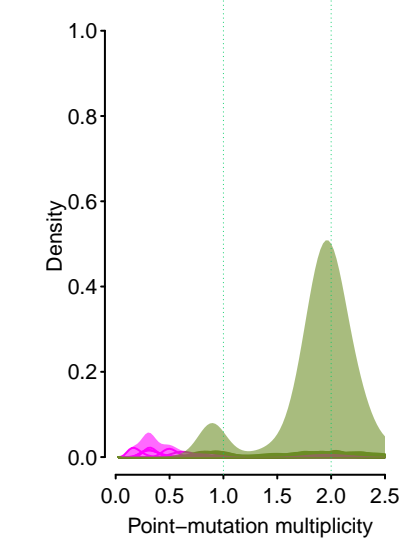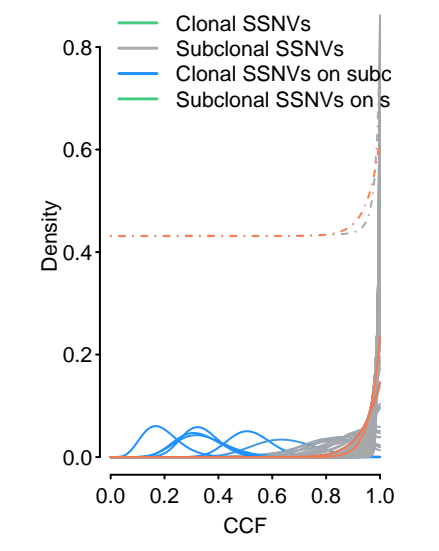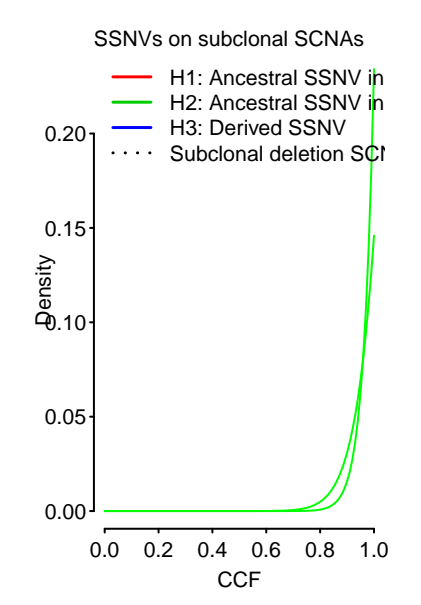



Sample 10

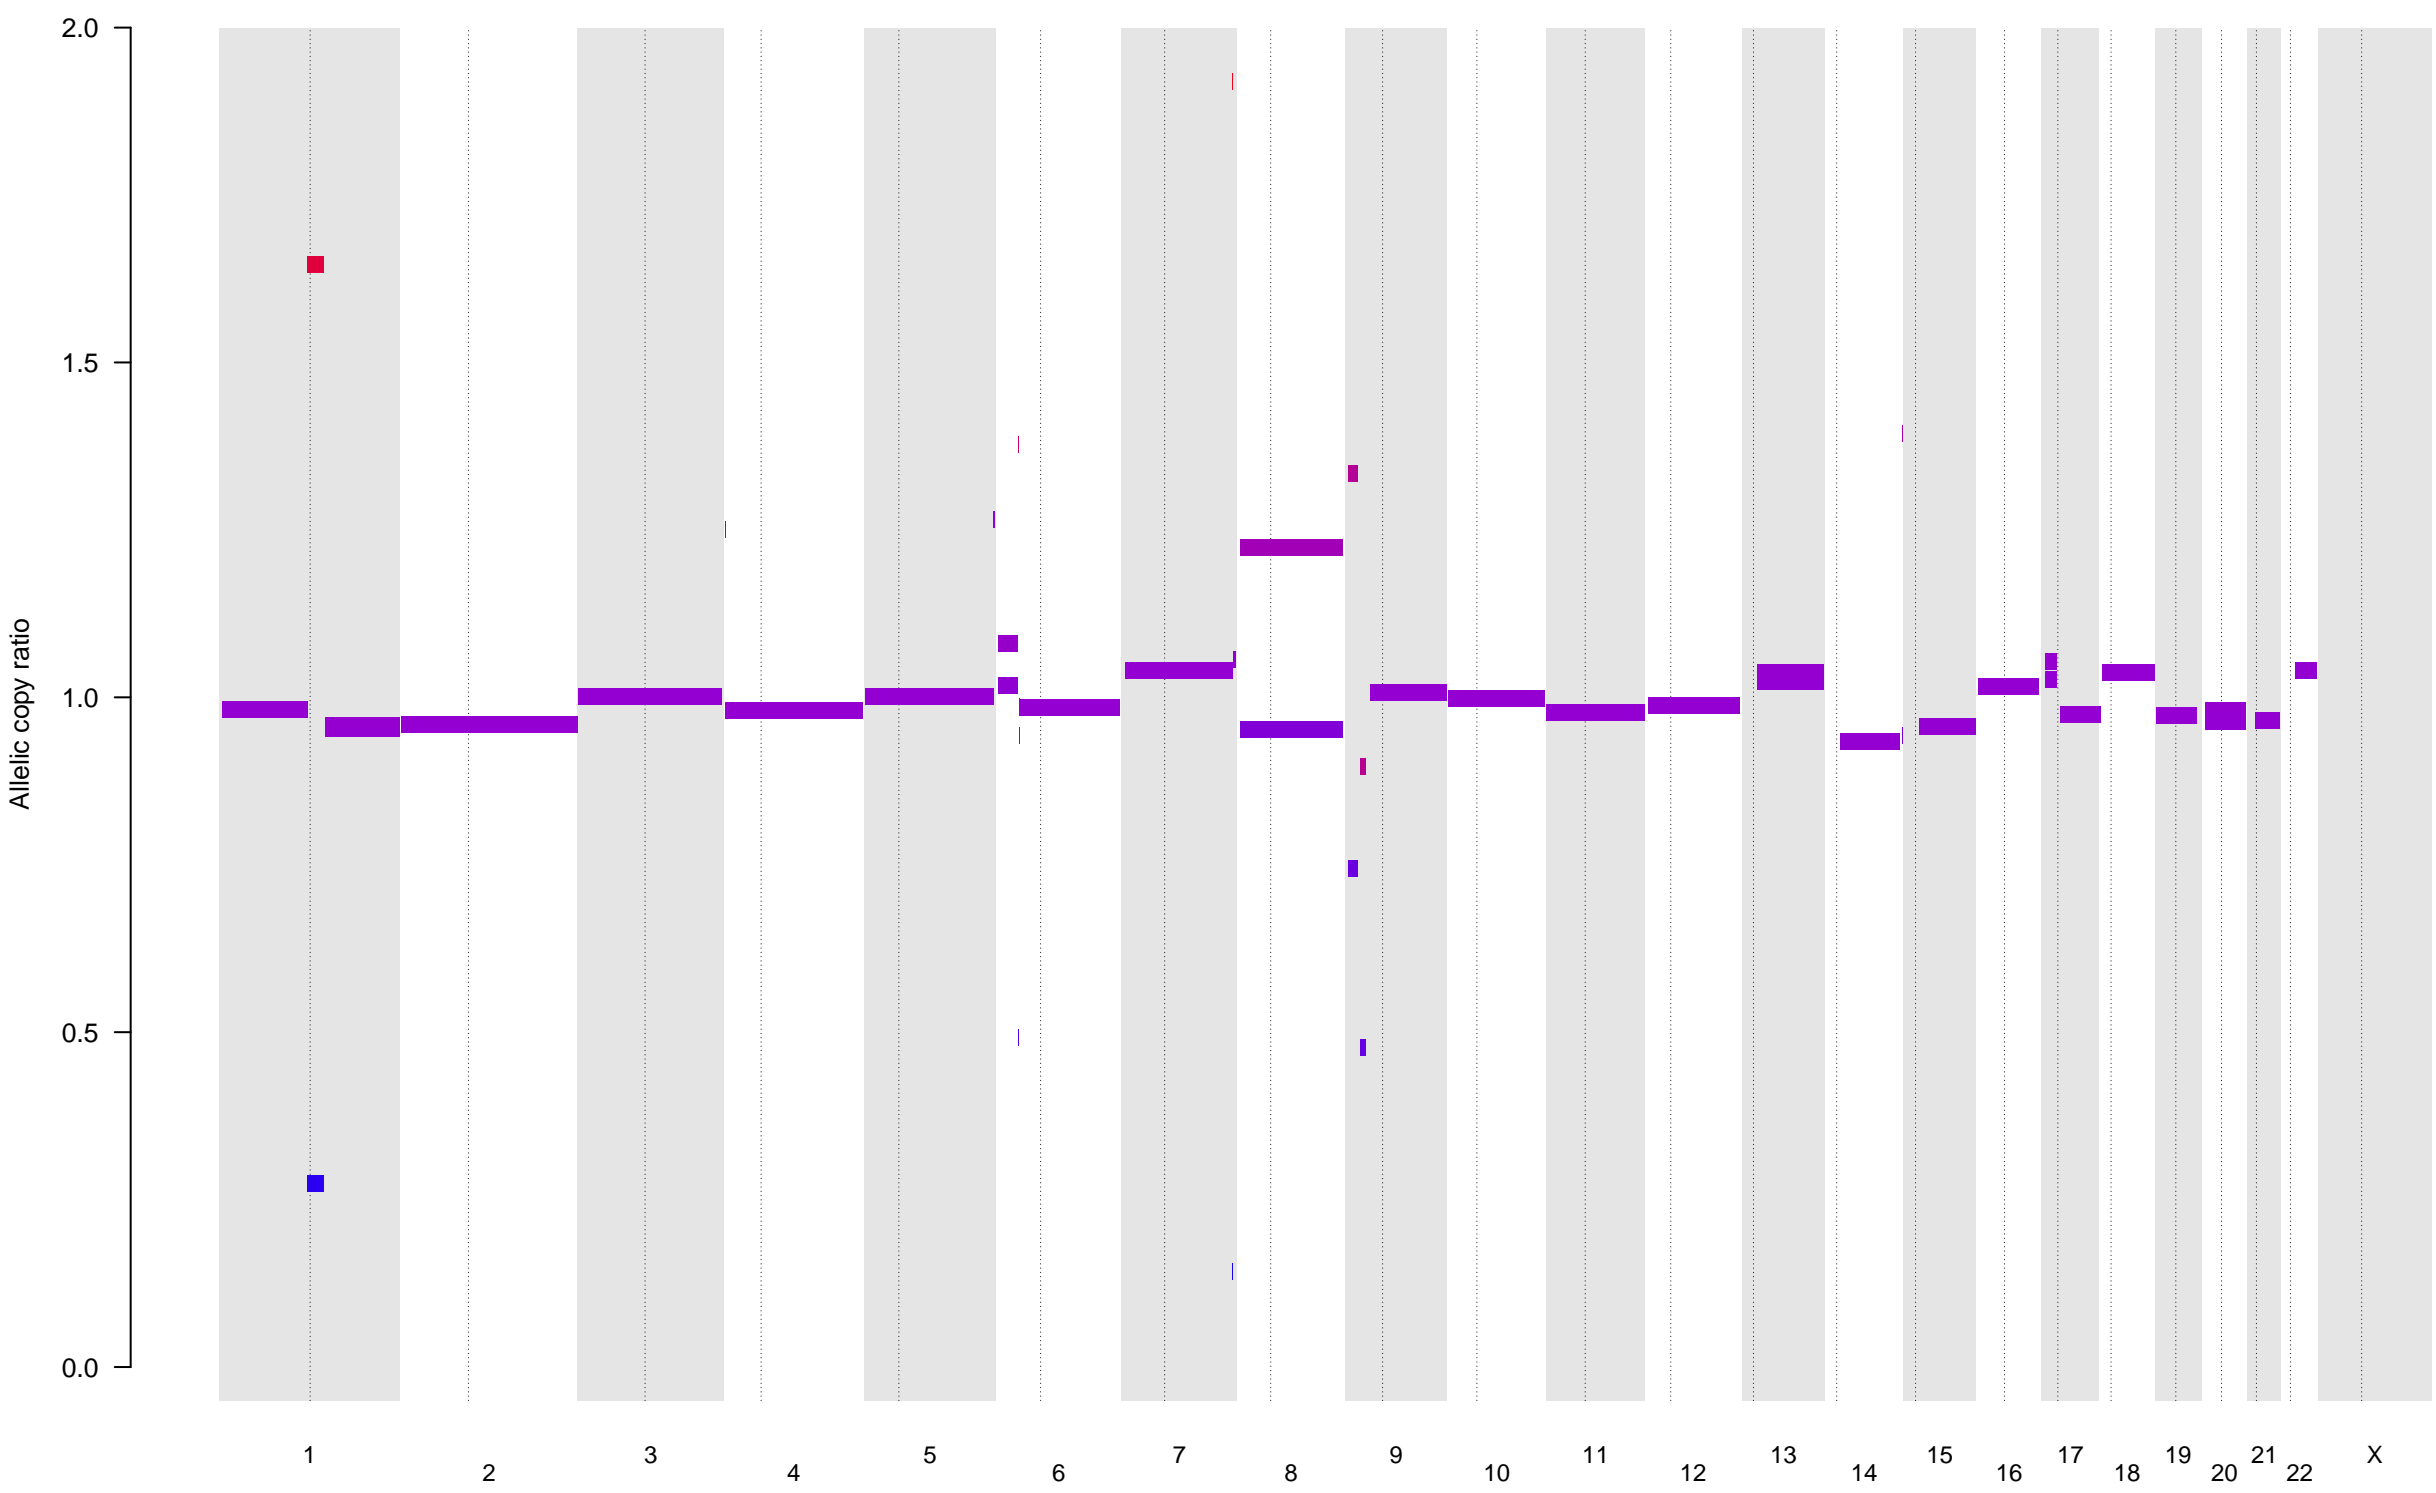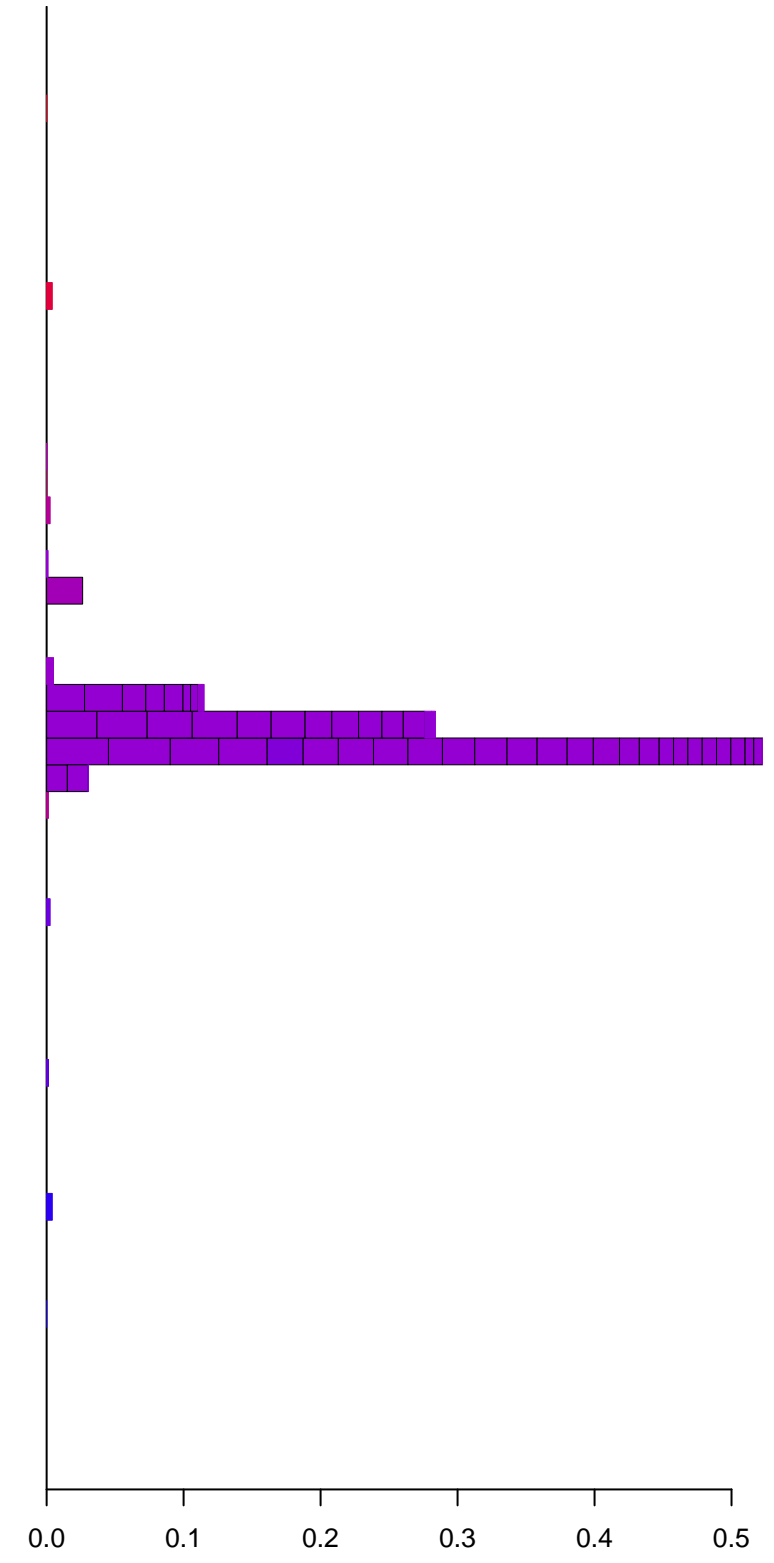

$\hat{p}_x = 0.23$ , ploidy:  $\hat{t} = 2.14$ ,  $\hat{t}_g = 2.07$   
 $\hat{\theta}_z = 0.09$ ,  $\hat{\theta}_a = 1.601$ , WGD=0  
 SCNA LL = -276.22, SSNV LL = -8203.62, SCNA Ev = -53.87688

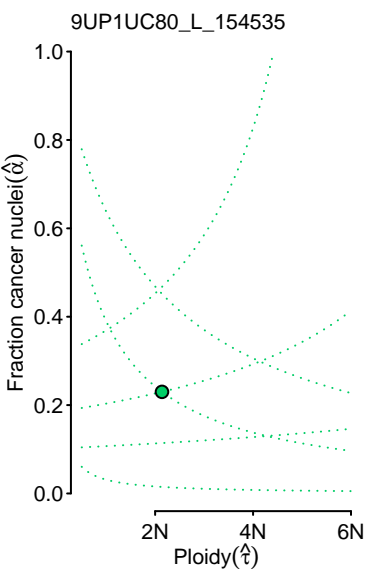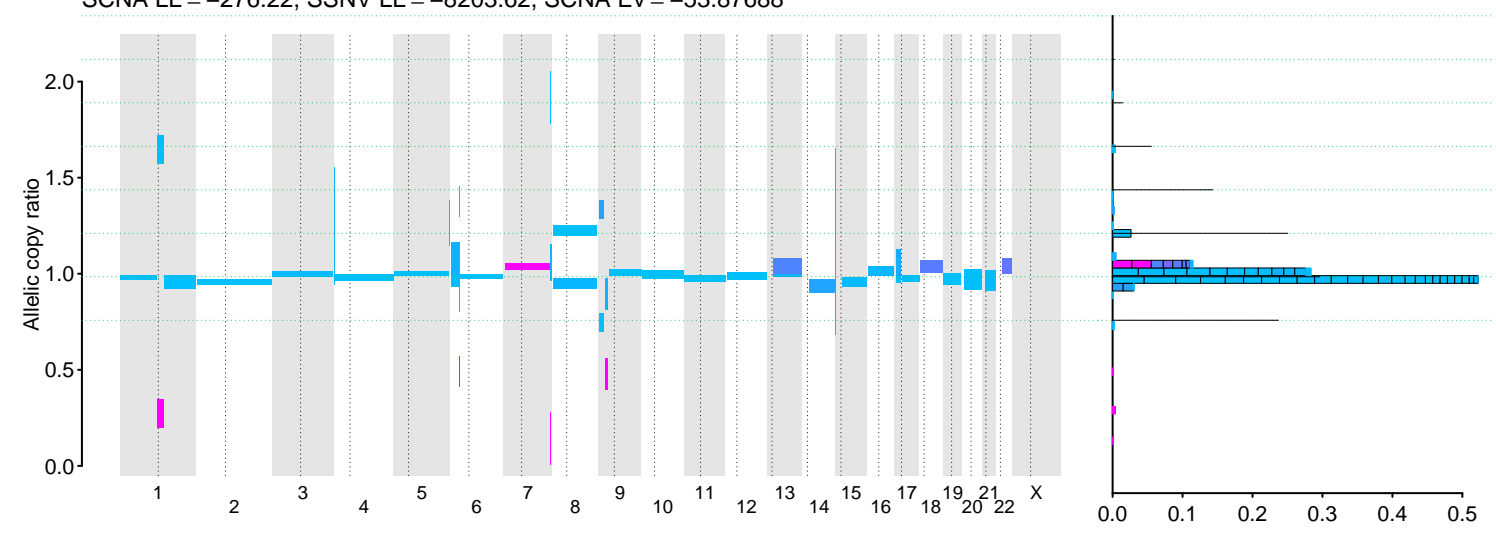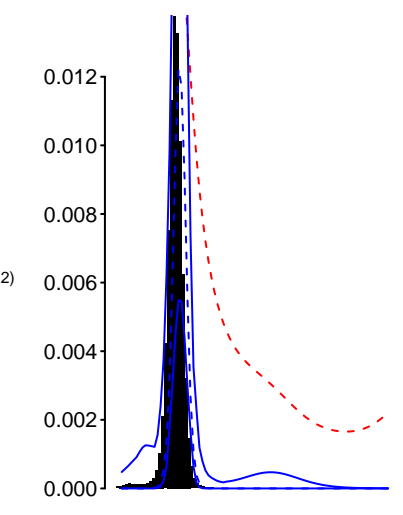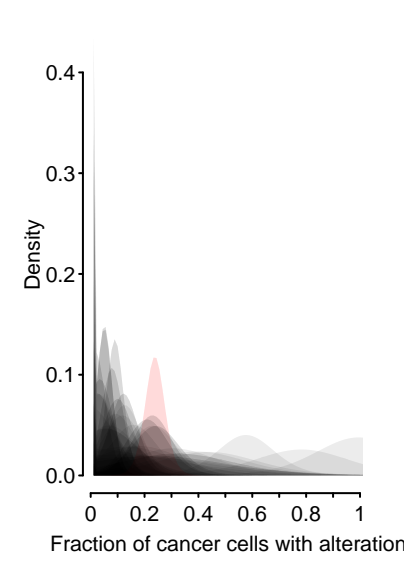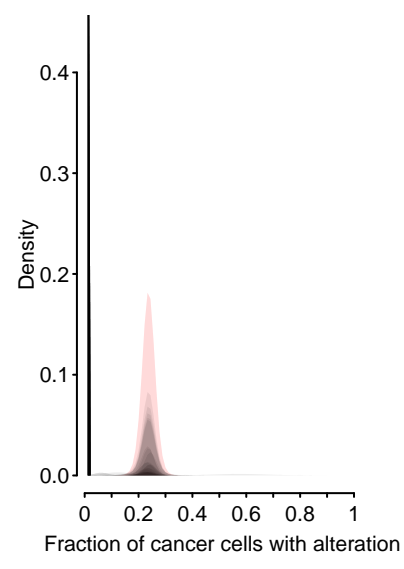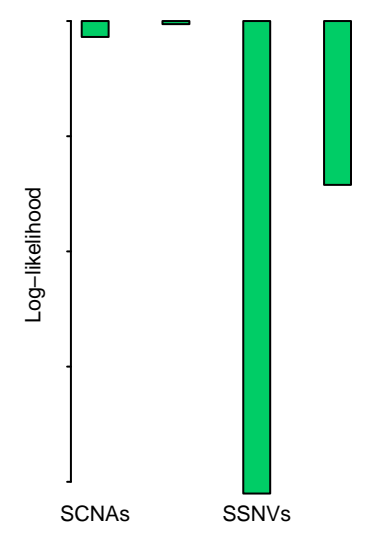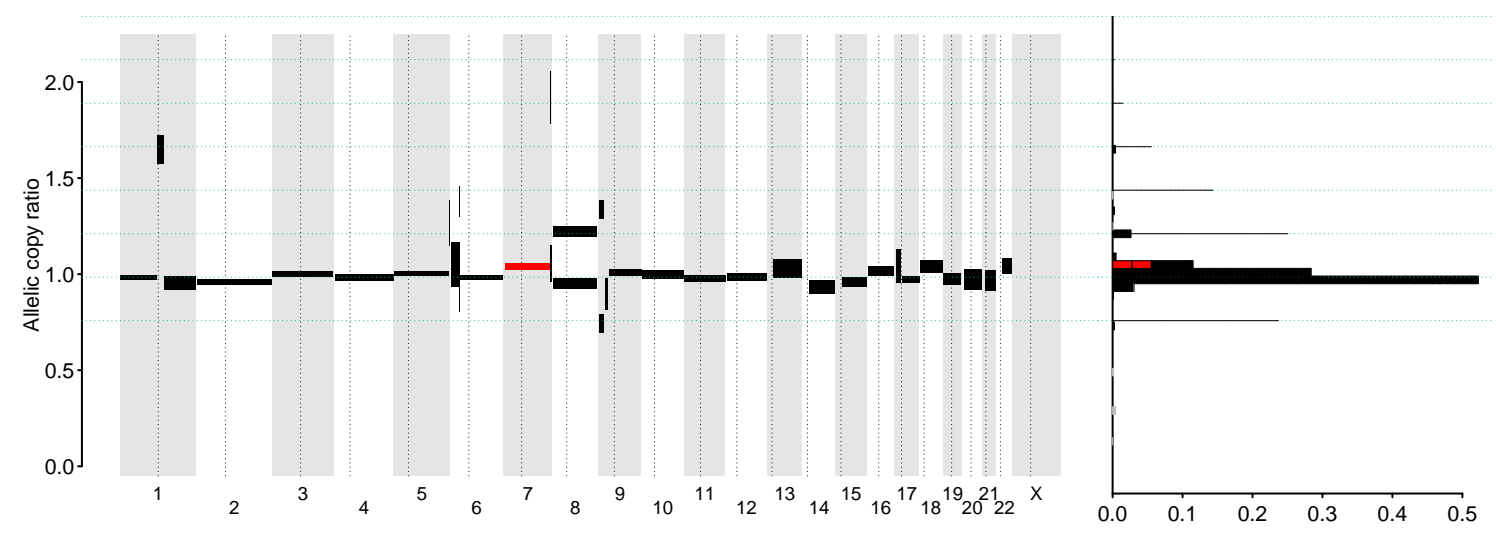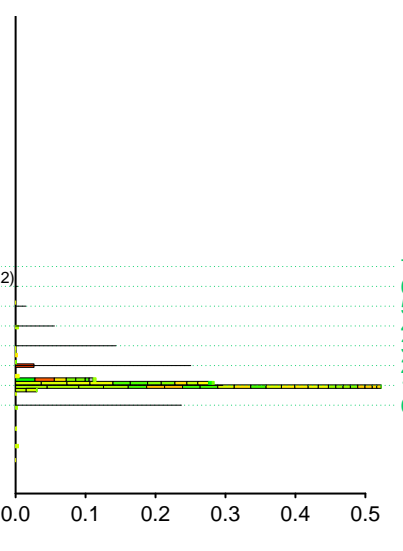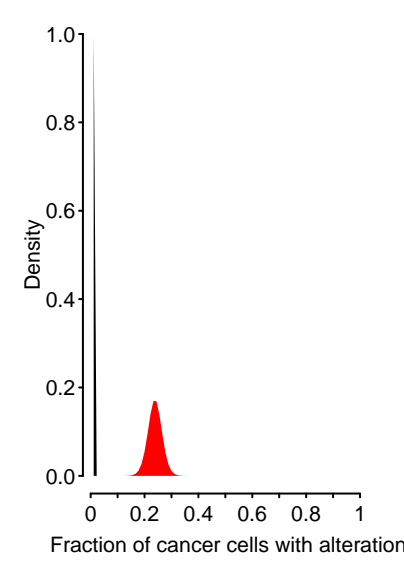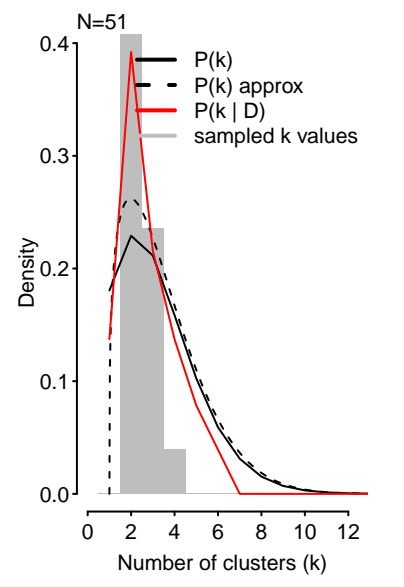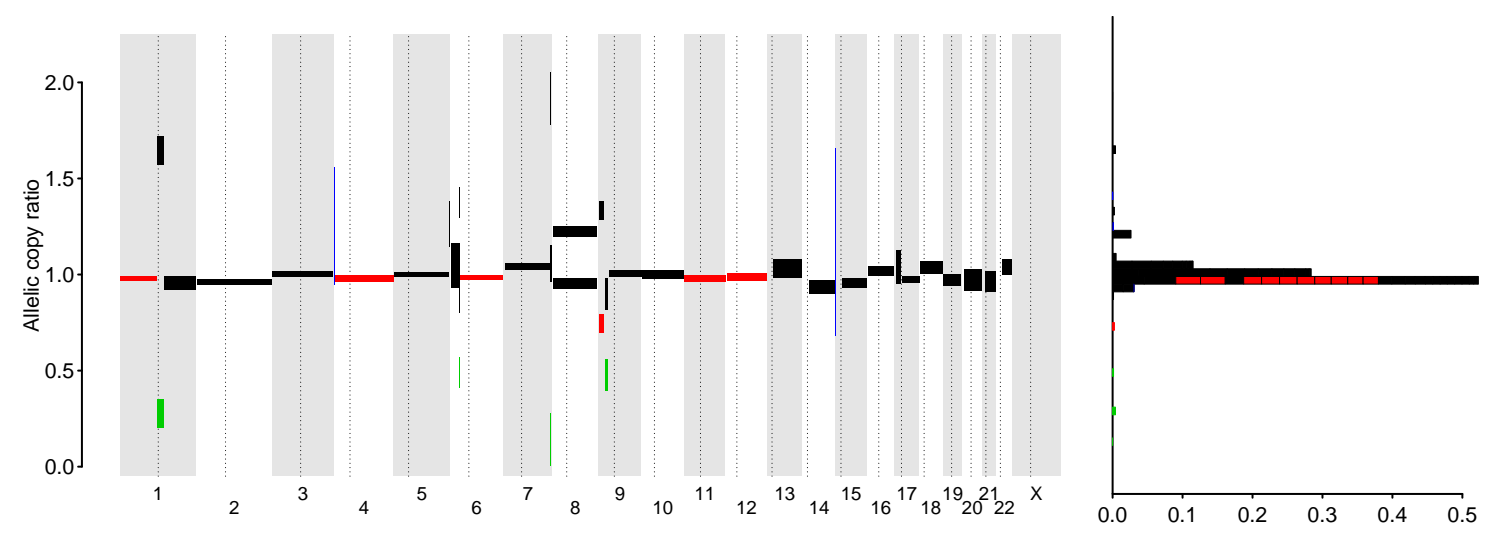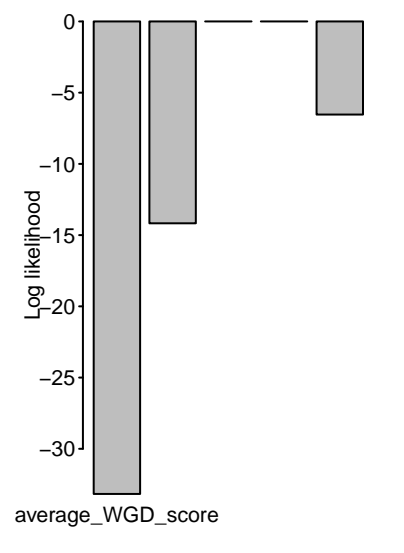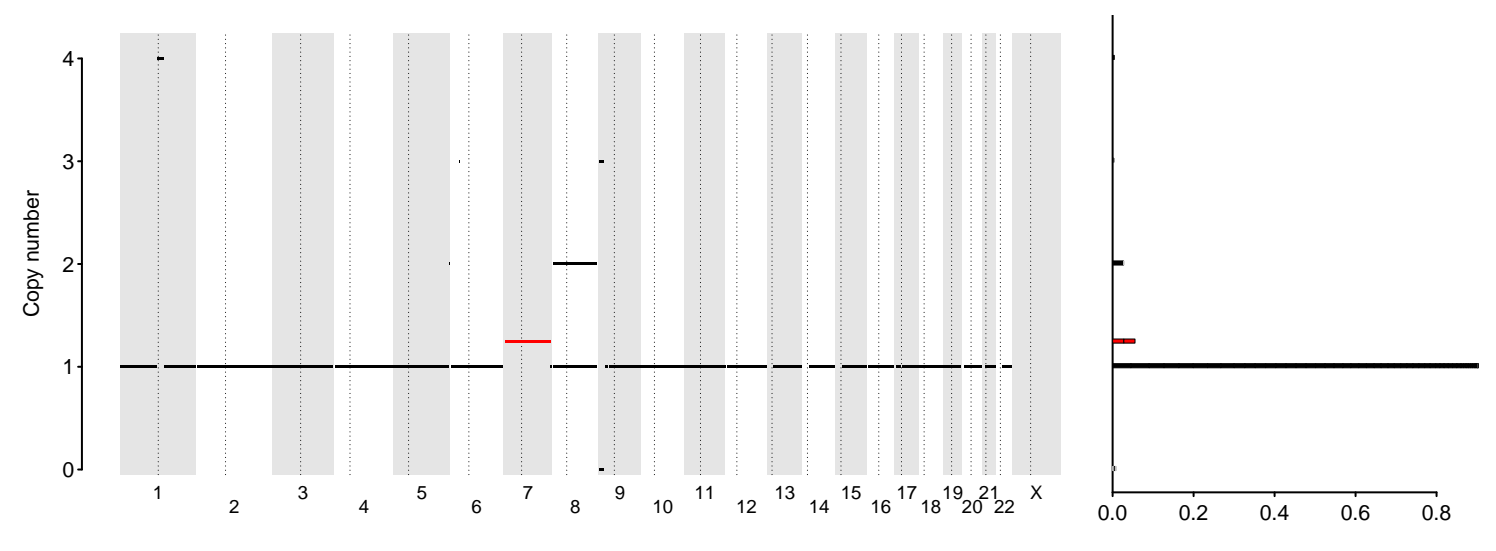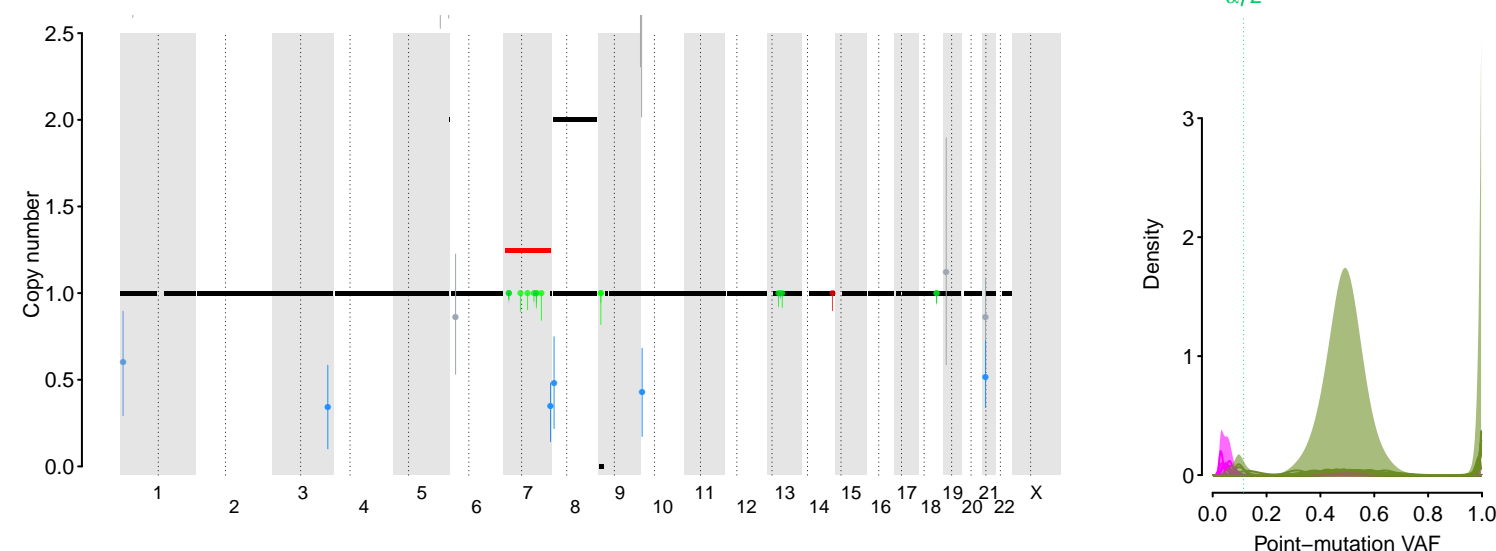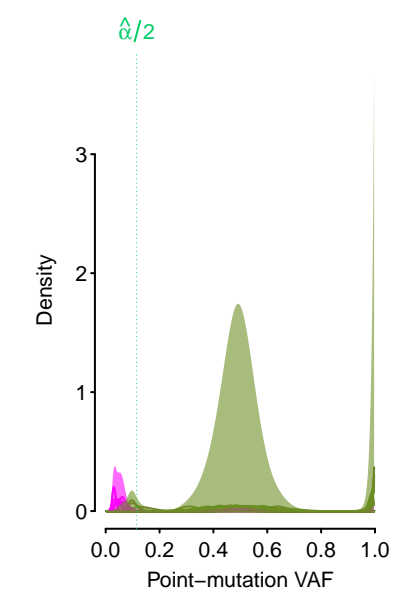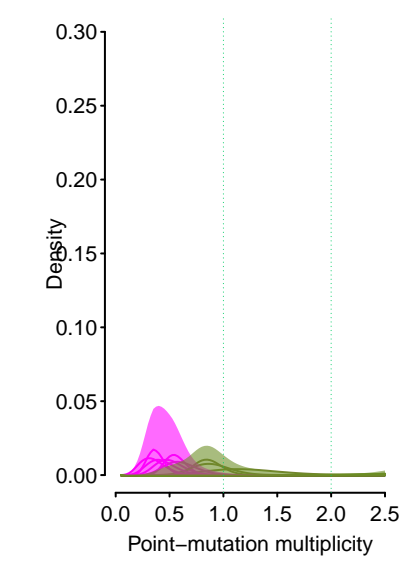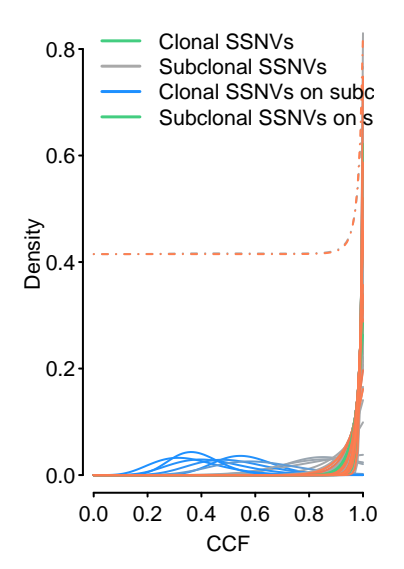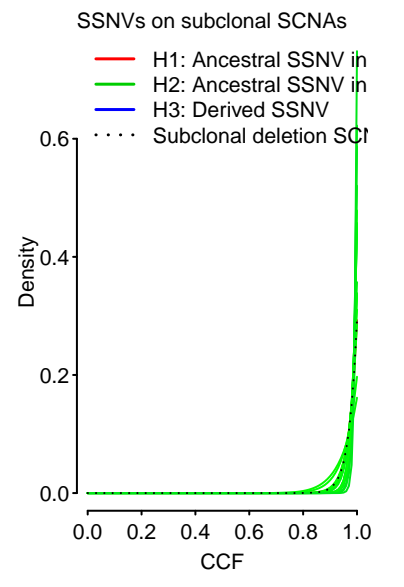

Sample 11

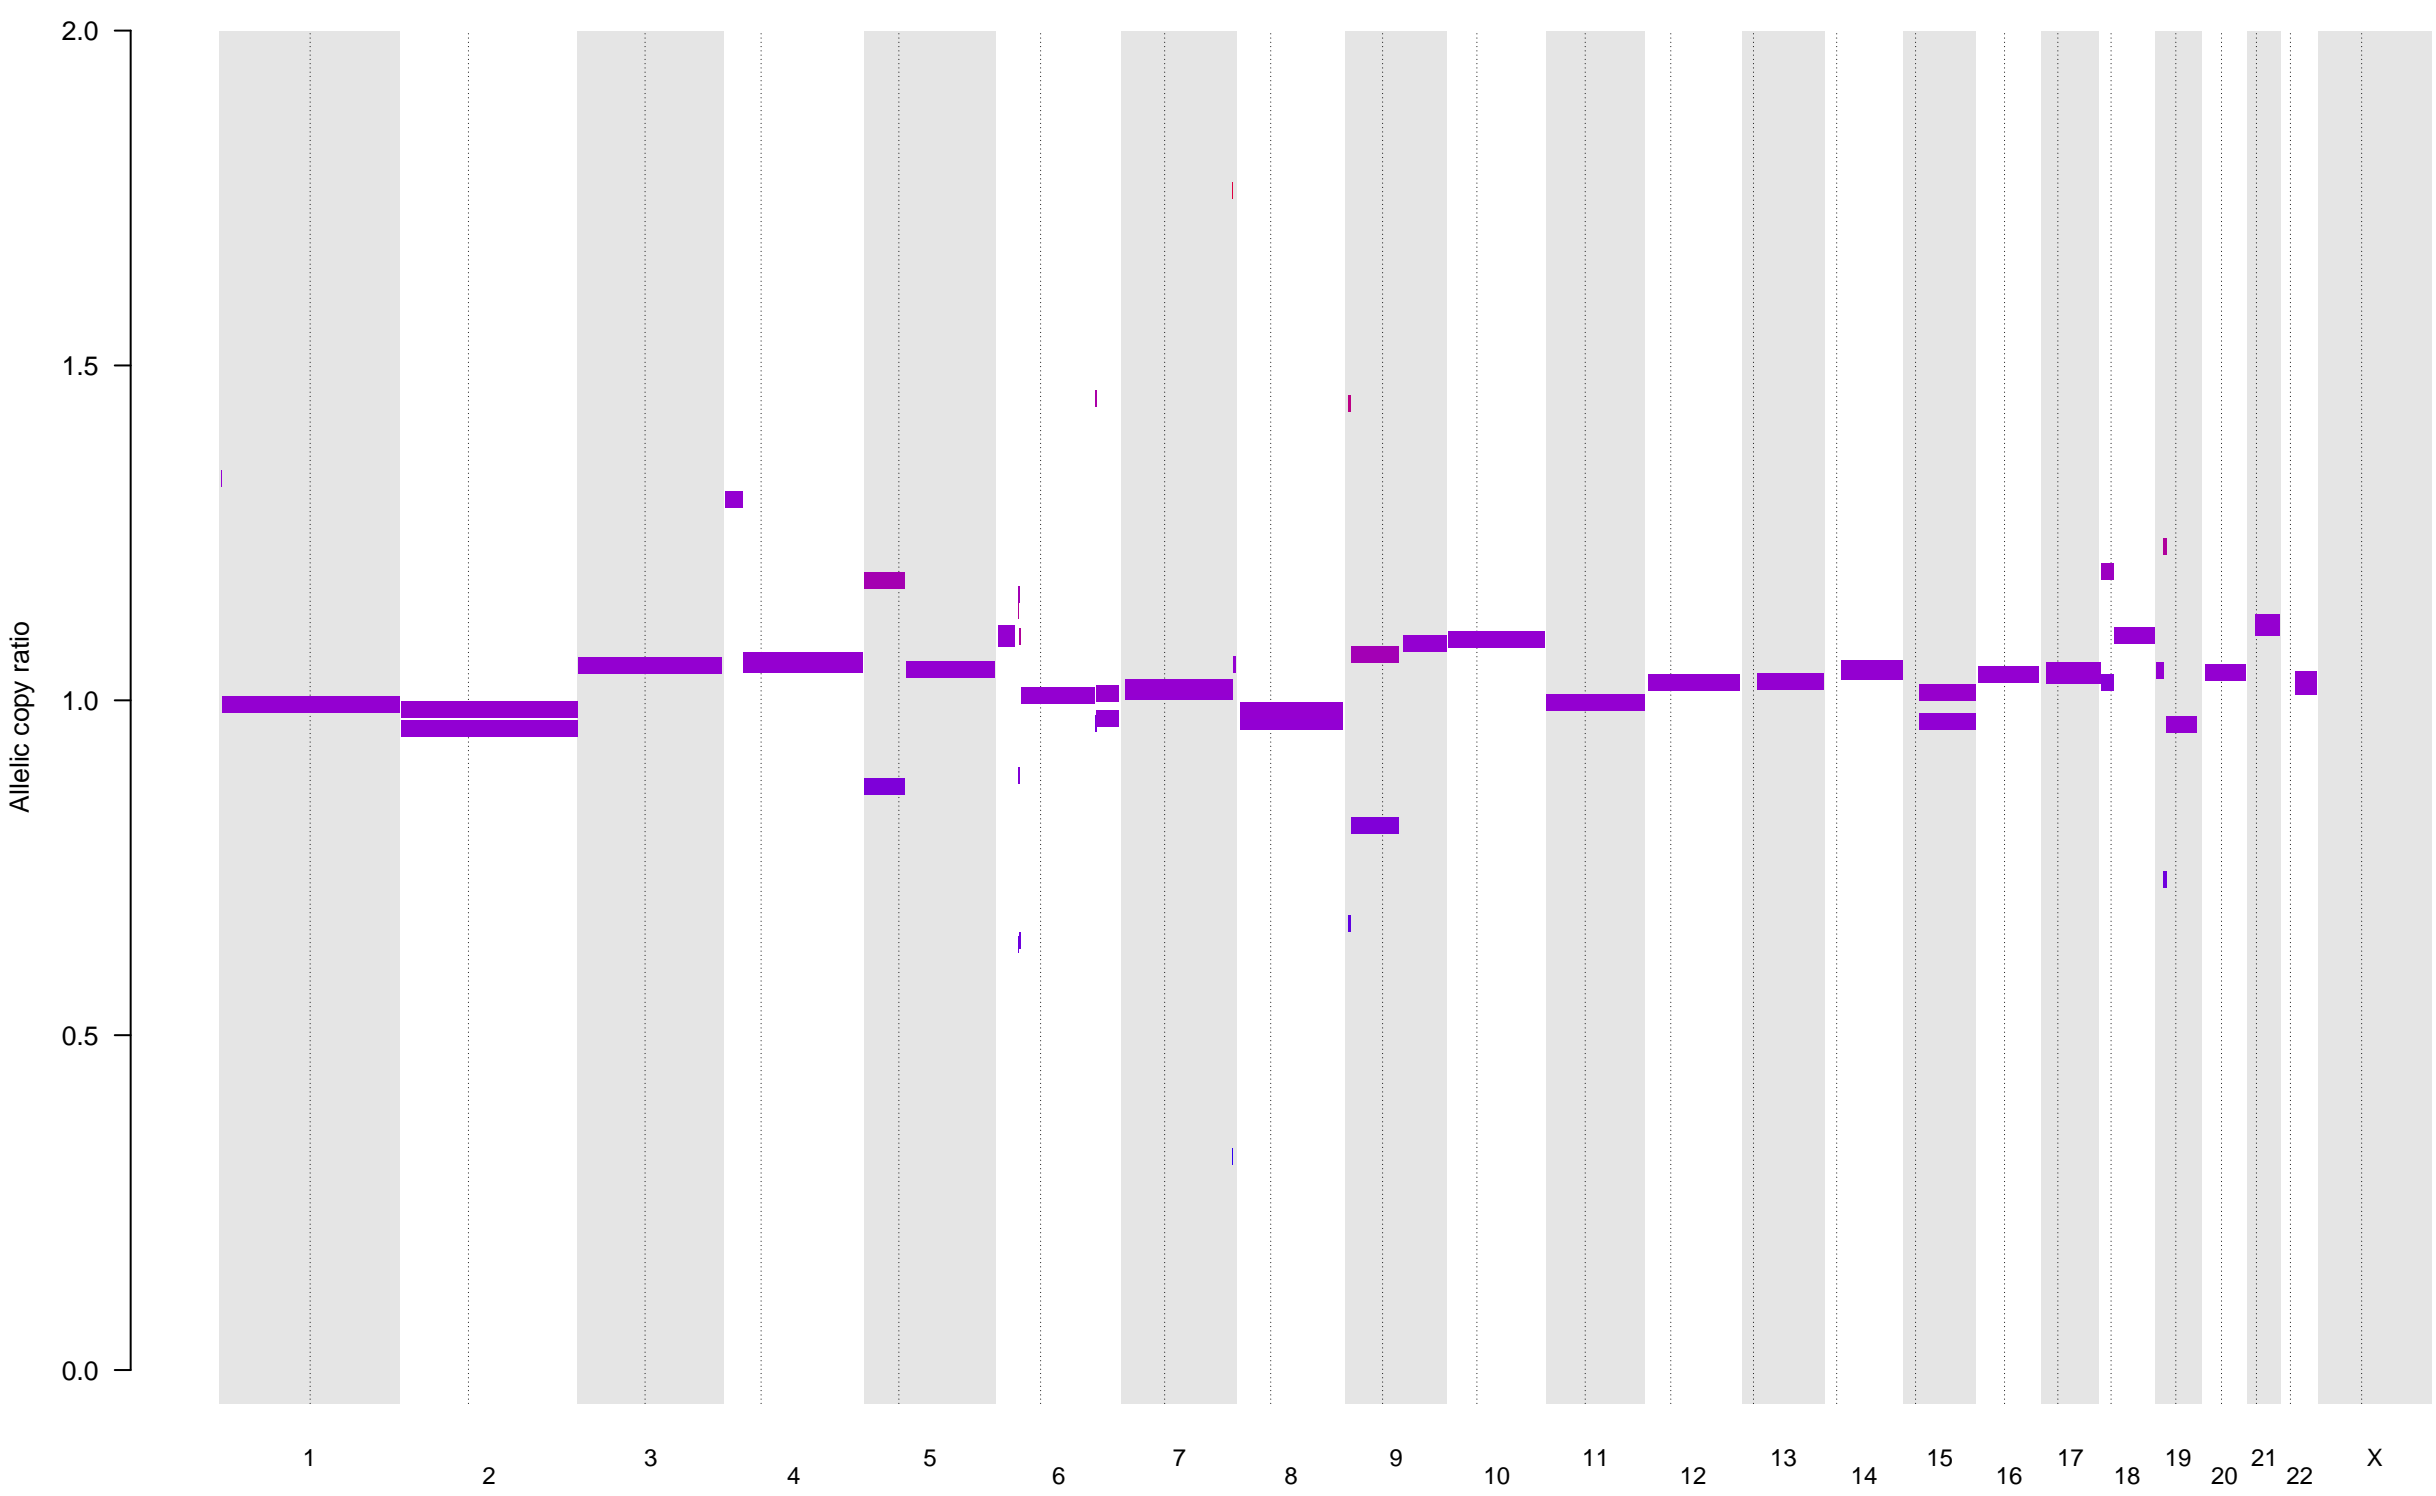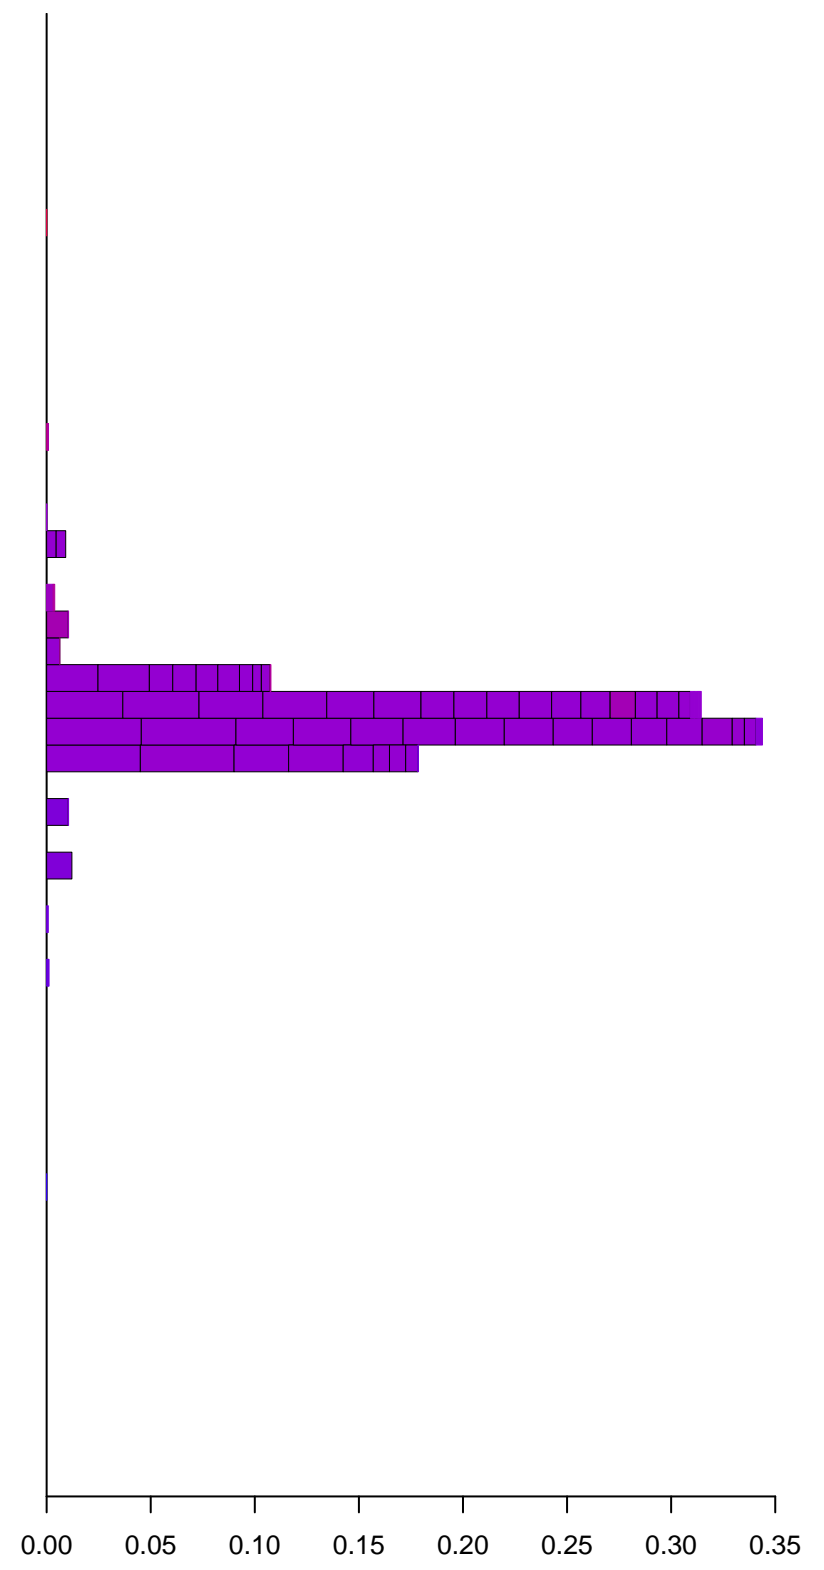

$\hat{\alpha} = 0.18$ , ploidy:  $\hat{\tau} = 1.71$ ,  $\hat{\tau}_g = 2.01$   
 $\theta_z = 0.16$ ,  $\theta_a = 1.604$ , WGD=0  
 SCNA LL = -316.96, SSNV LL = -6764.39, SCNA Ev = -84.36891

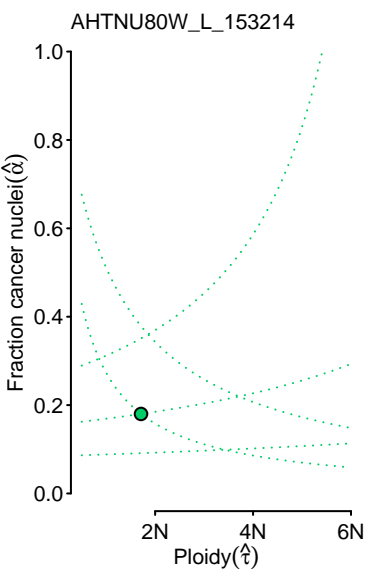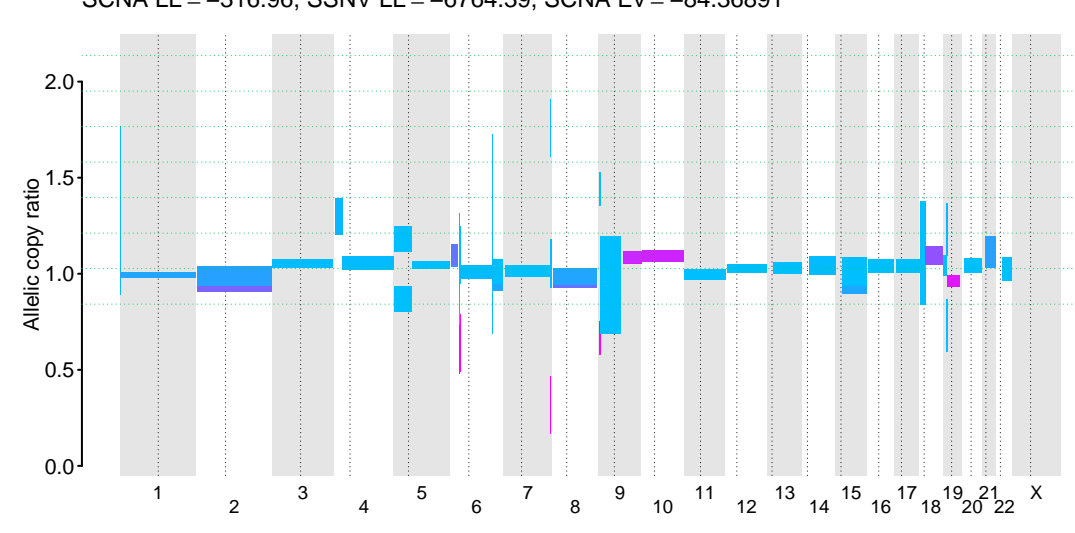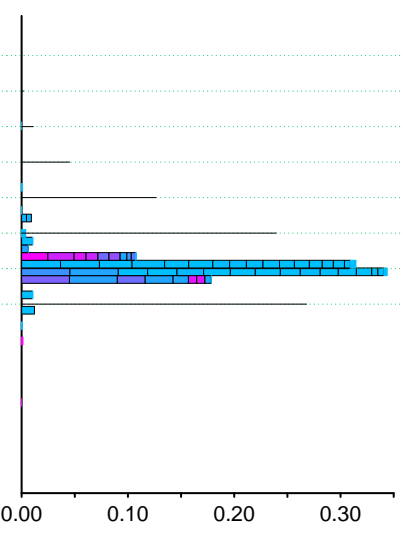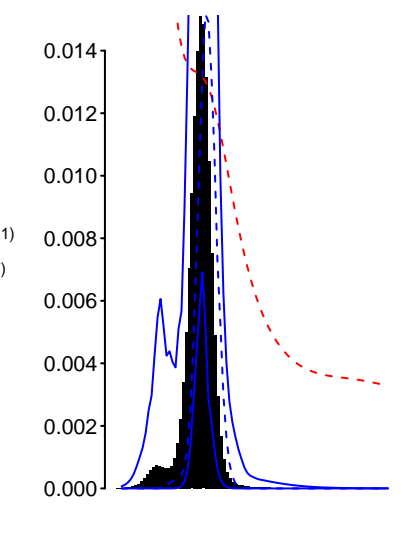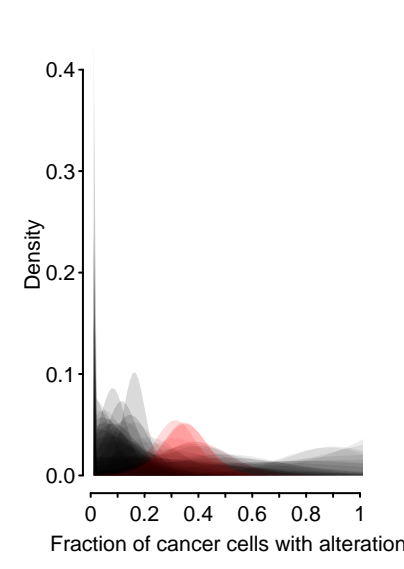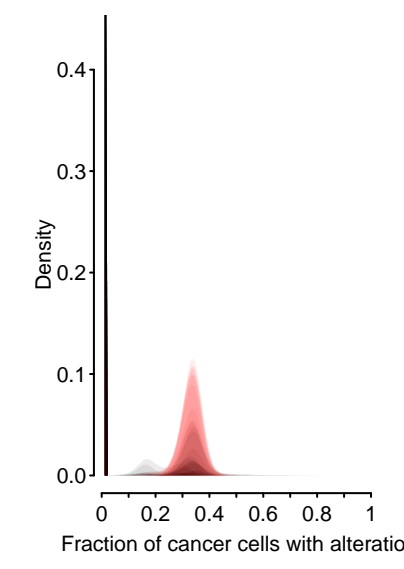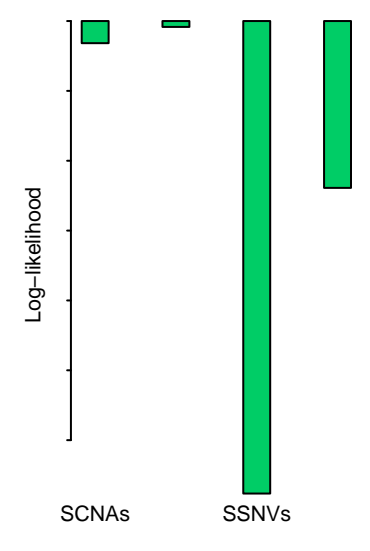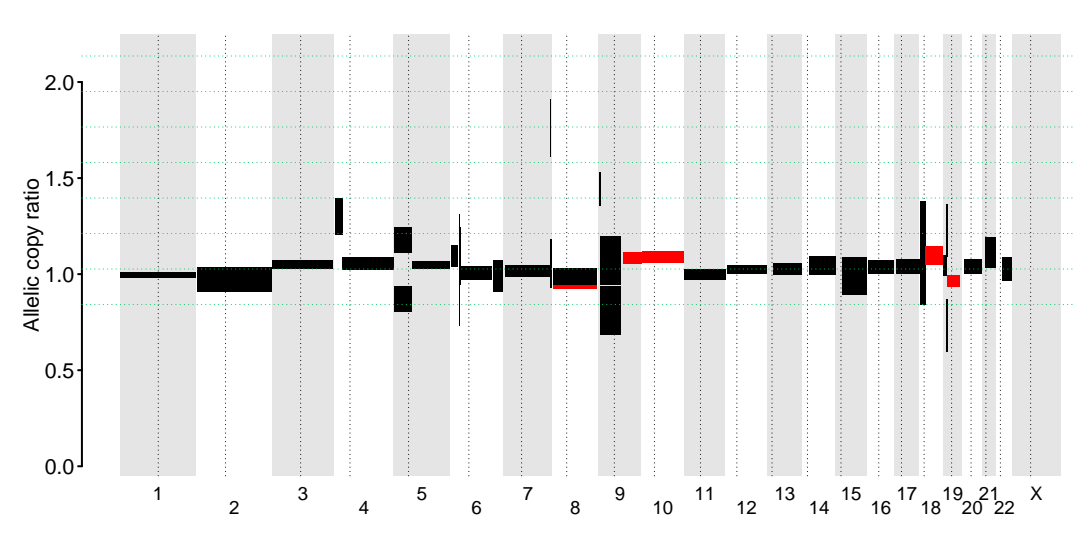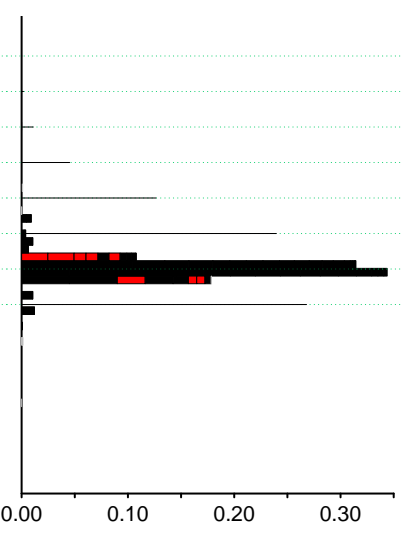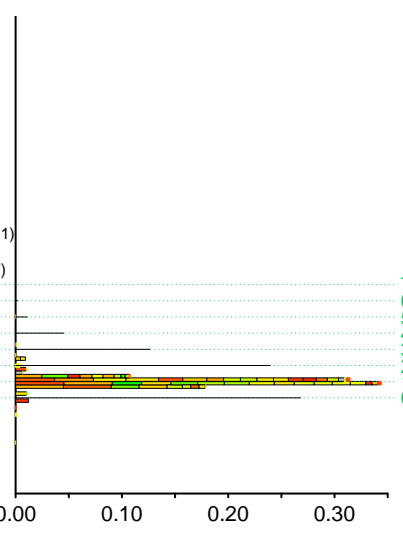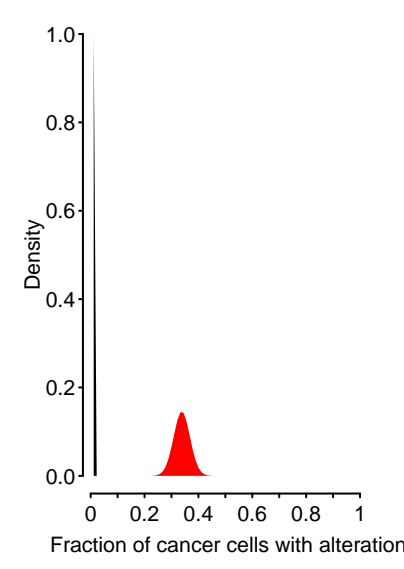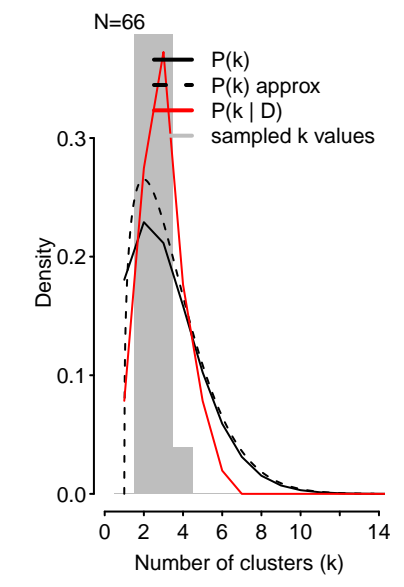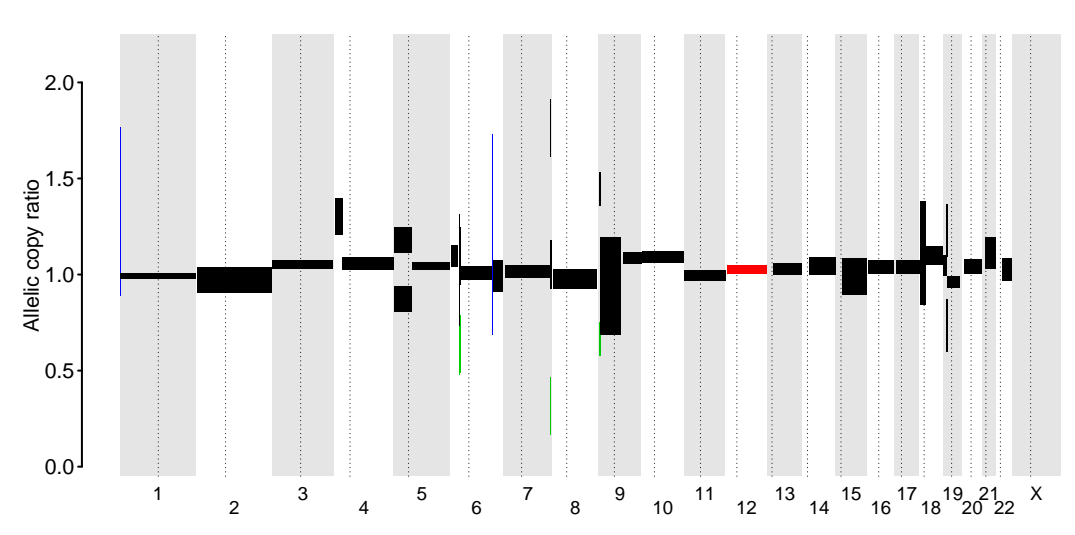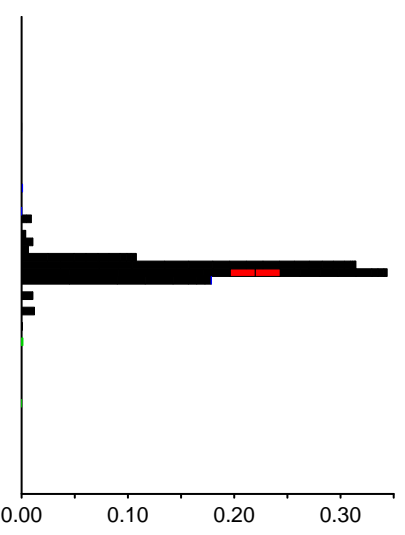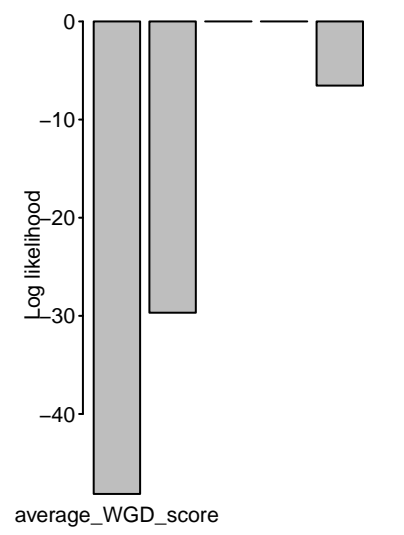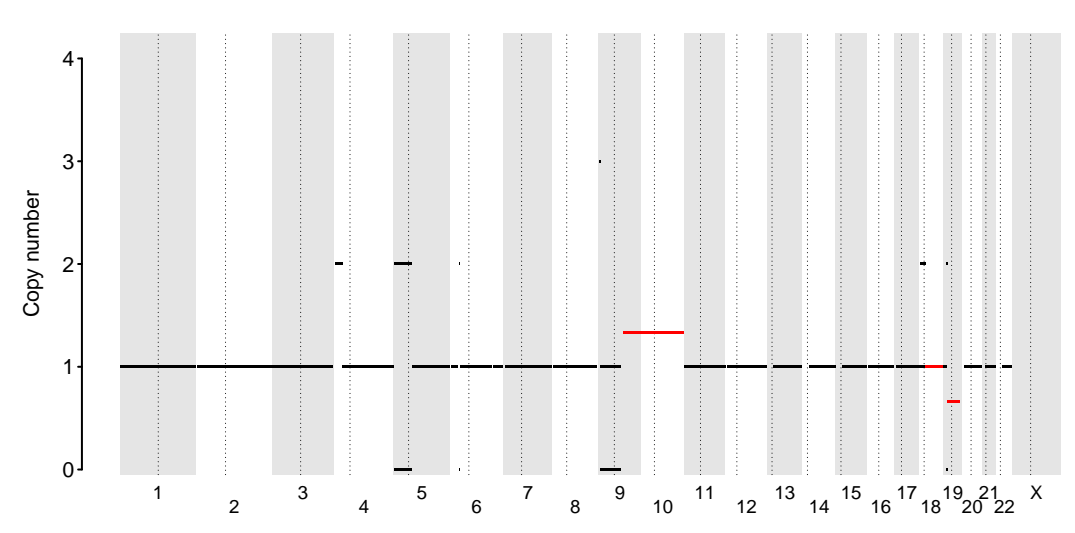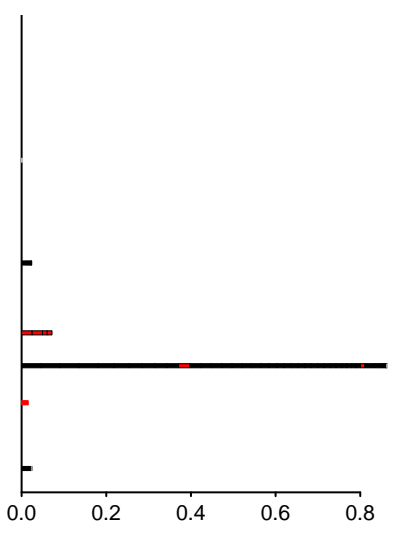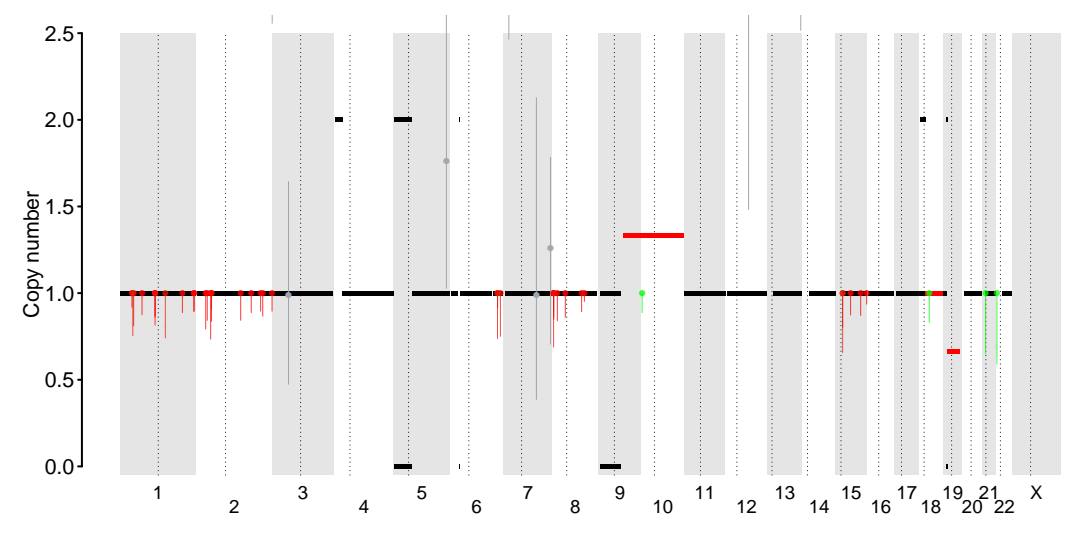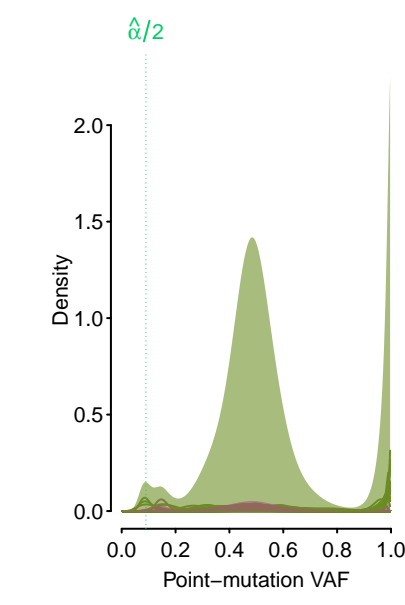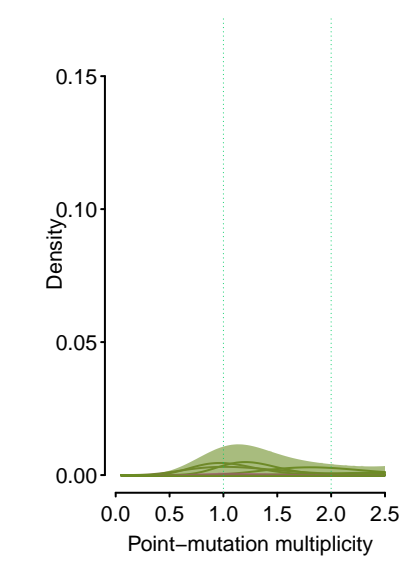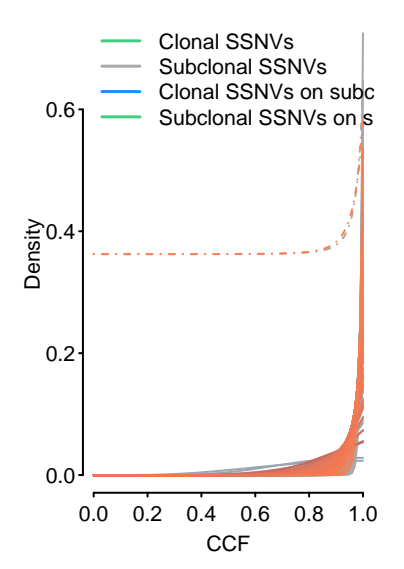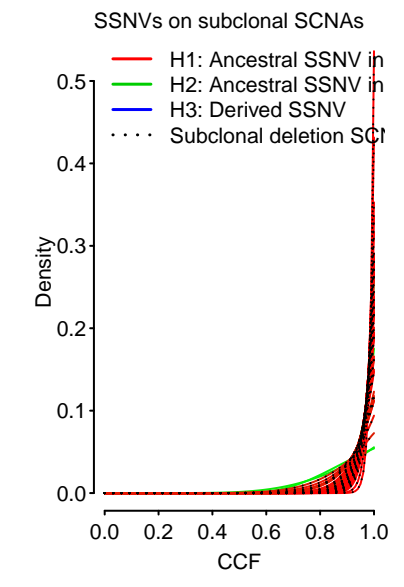

Sample 12

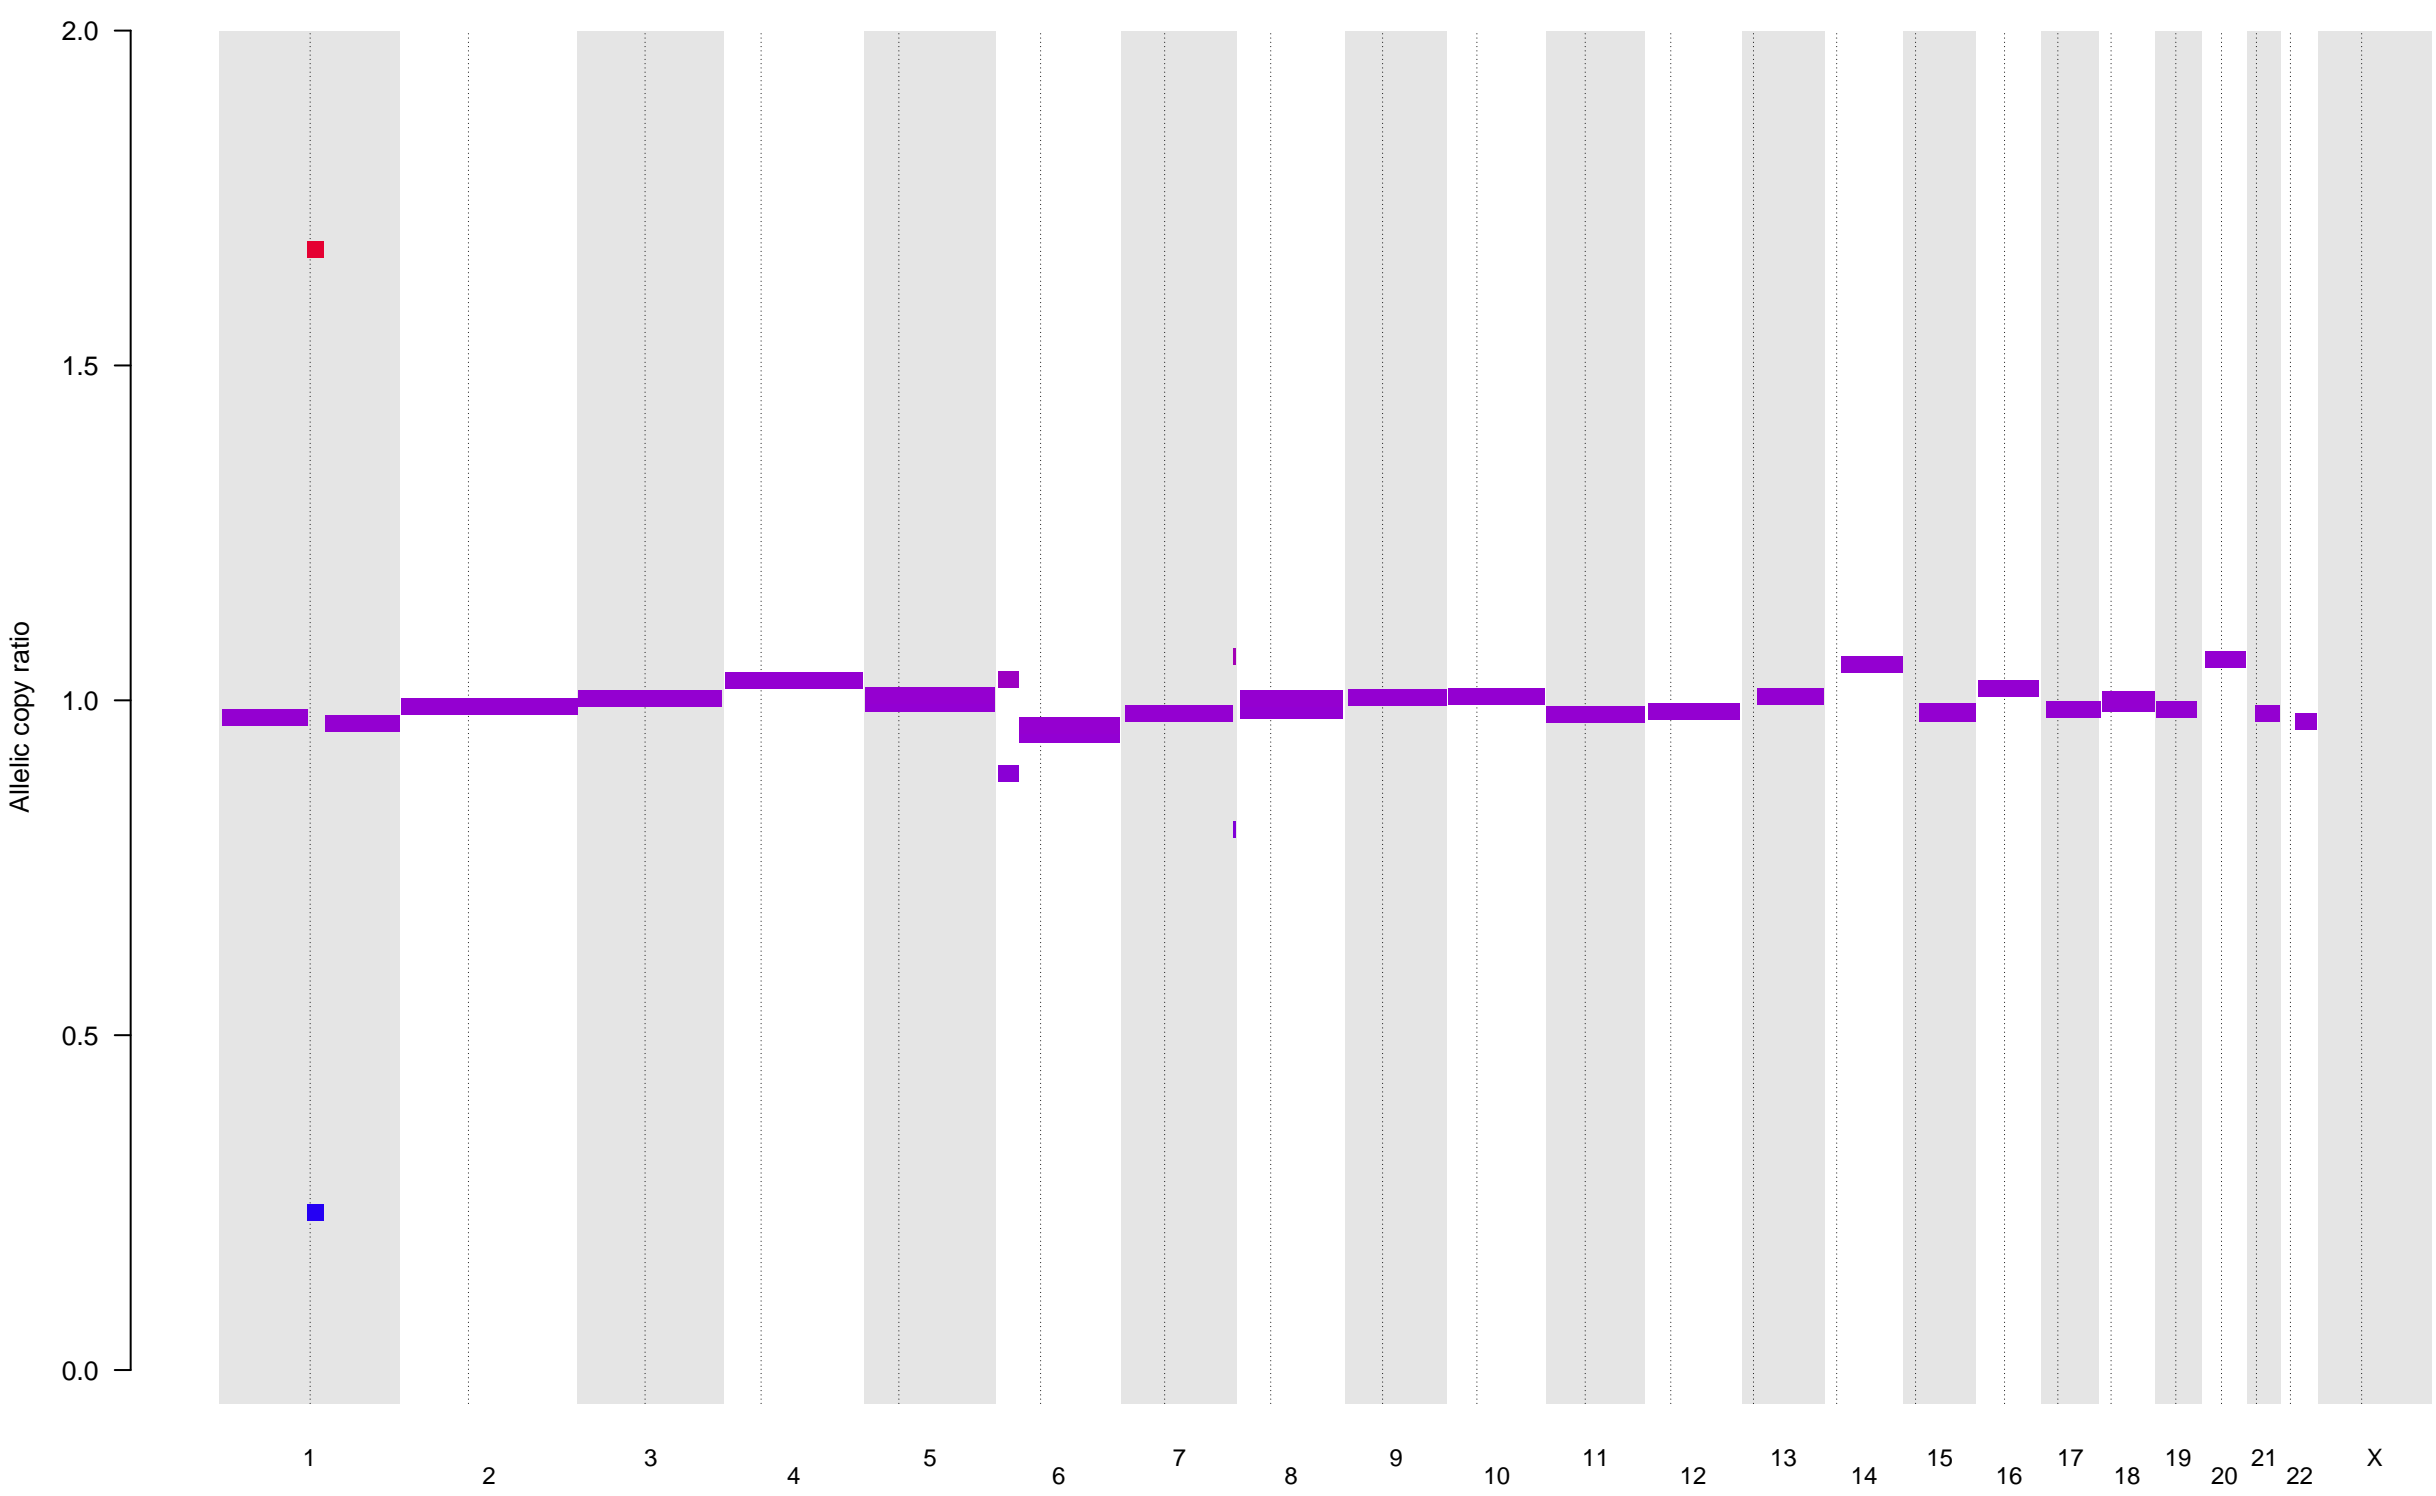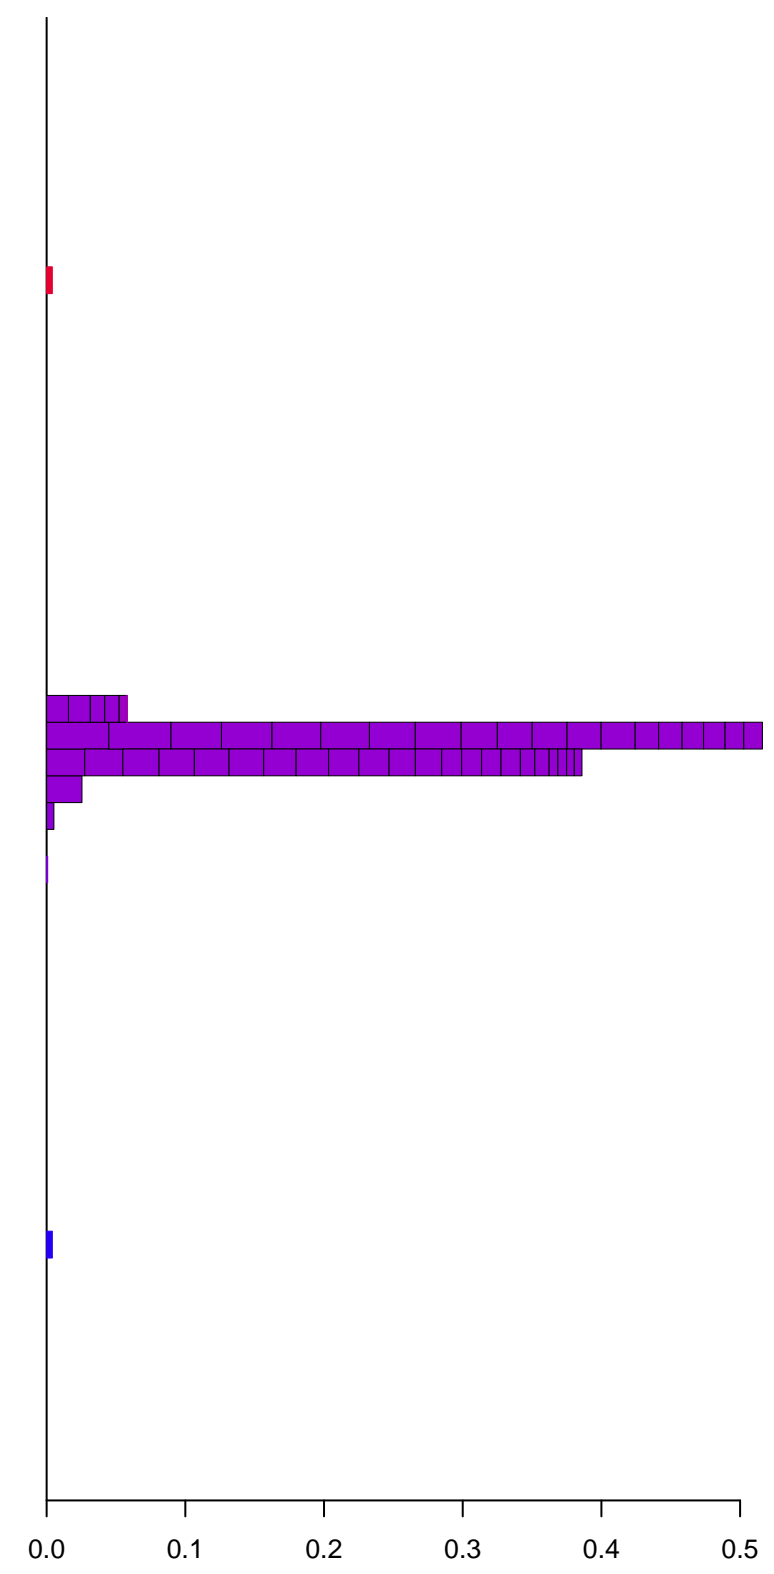

BZDLUA60\_L\_153217

purity( $\hat{\alpha}$ ) = 0.1, ploidy:  $\hat{t} = 2.21$ ,  $\hat{t}_g = 2.13$   
 $\hat{\theta}_z = 0.02$ ,  $\hat{\theta}_Q = 1.149$ , WGD=0  
SCNA LL = -205.3, SSNV LL = -10391.58, SCNA Ev = -41.24438

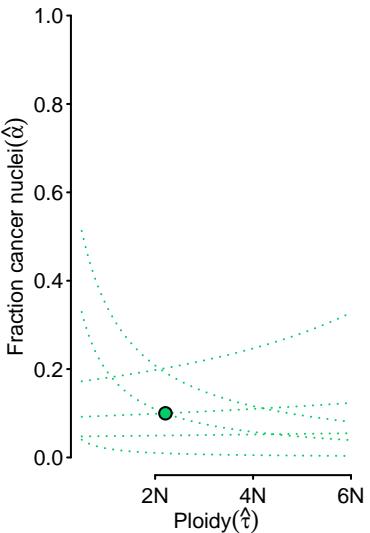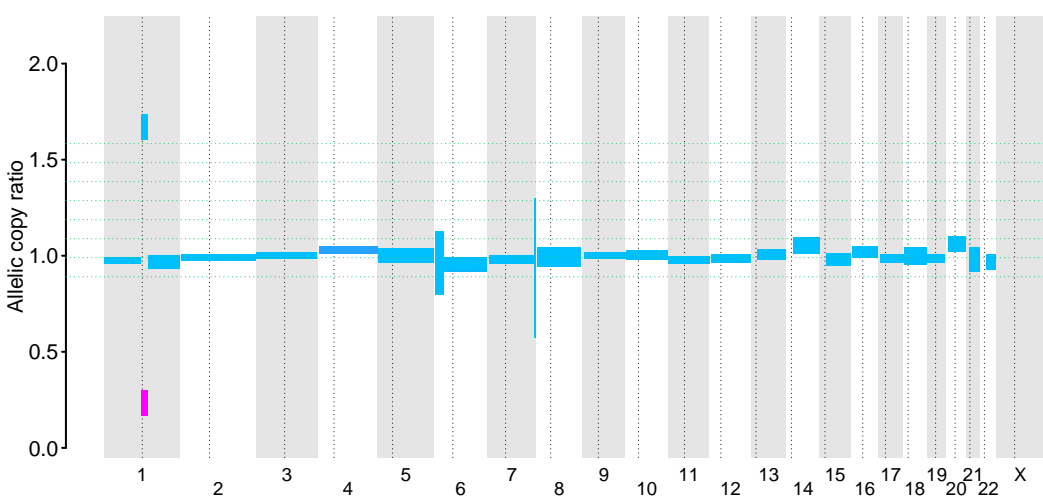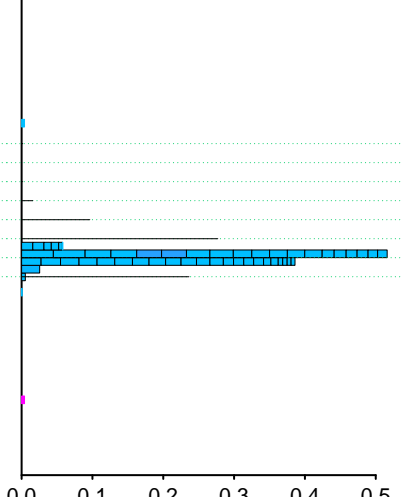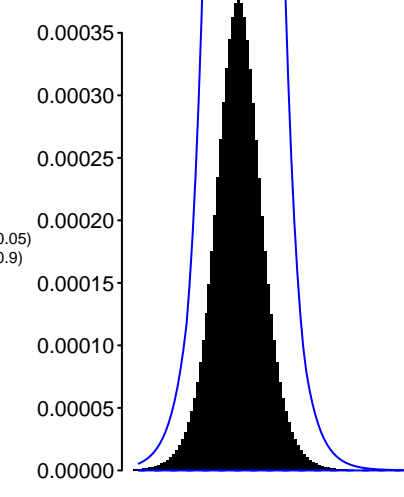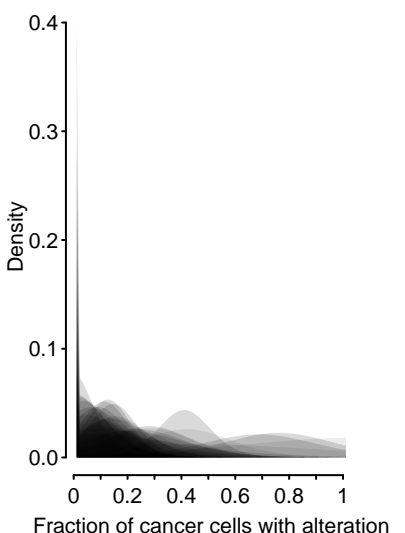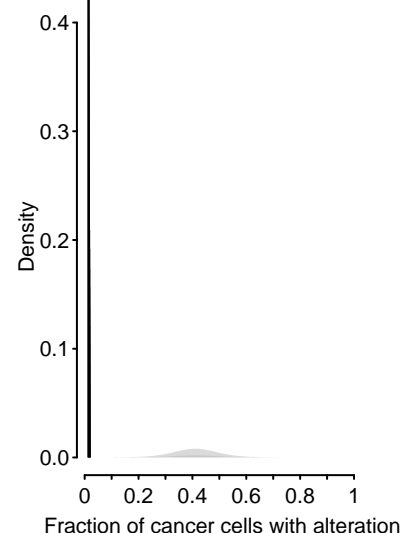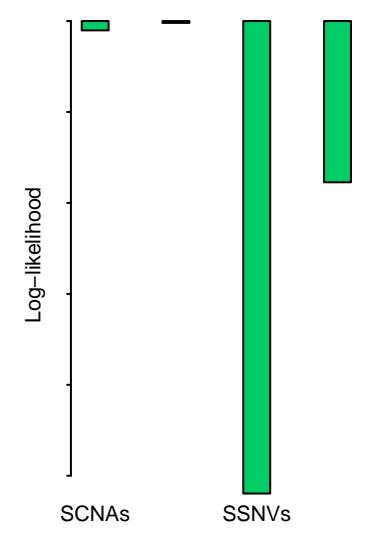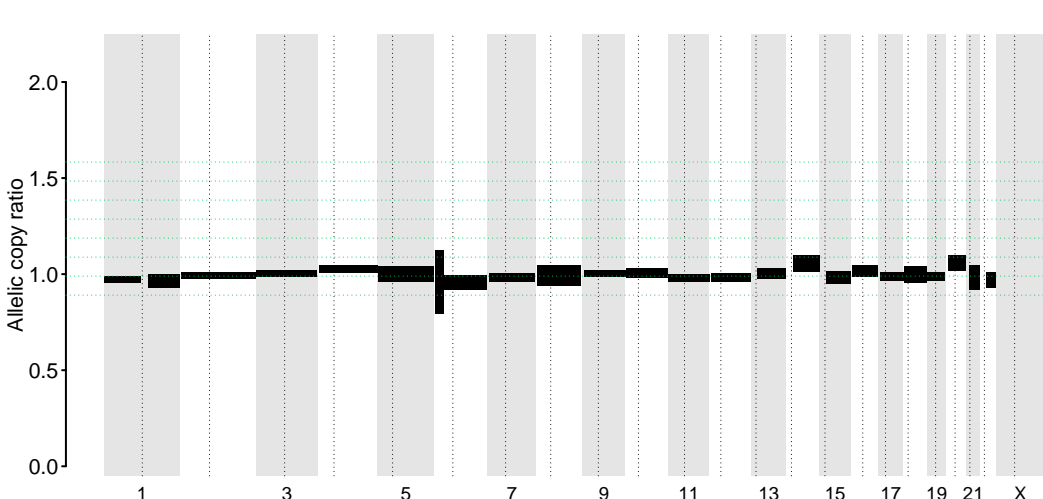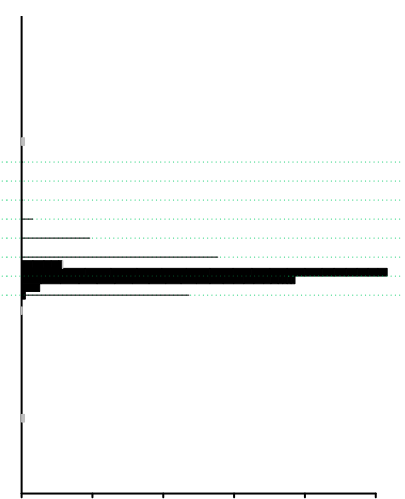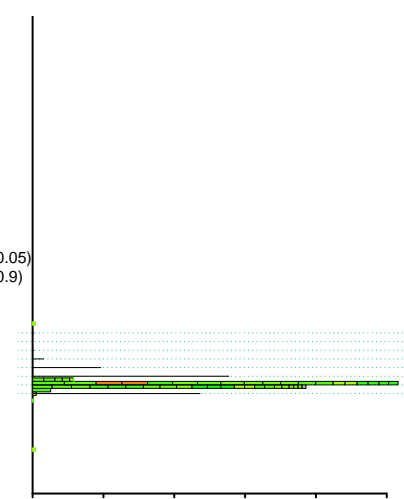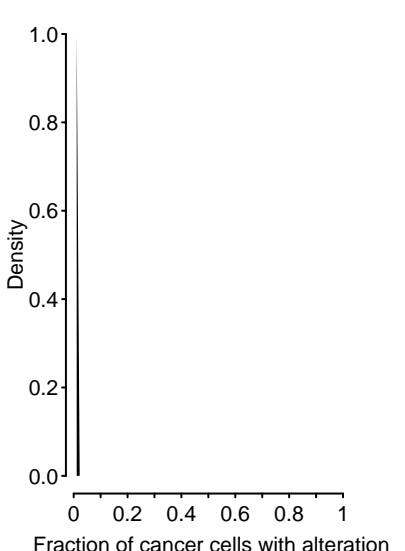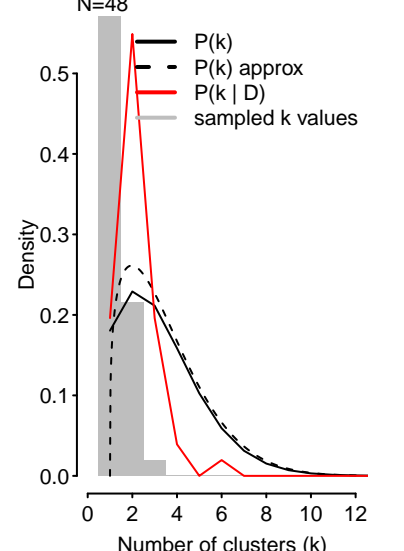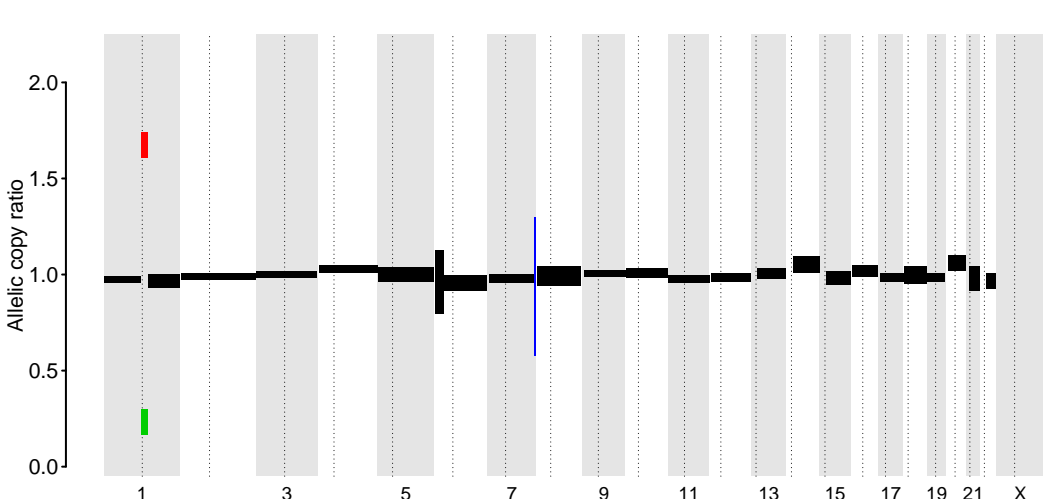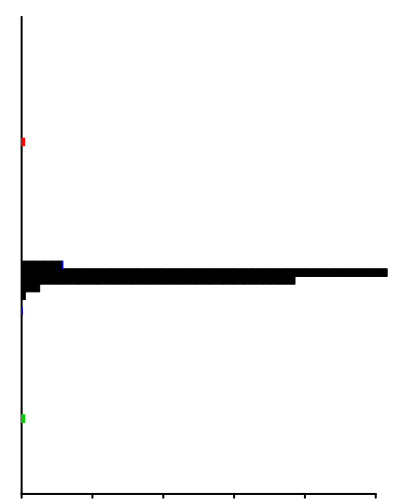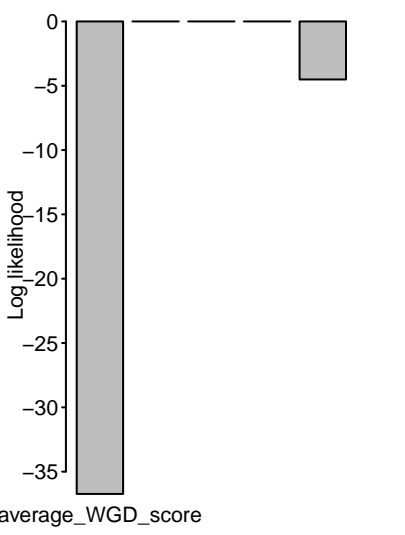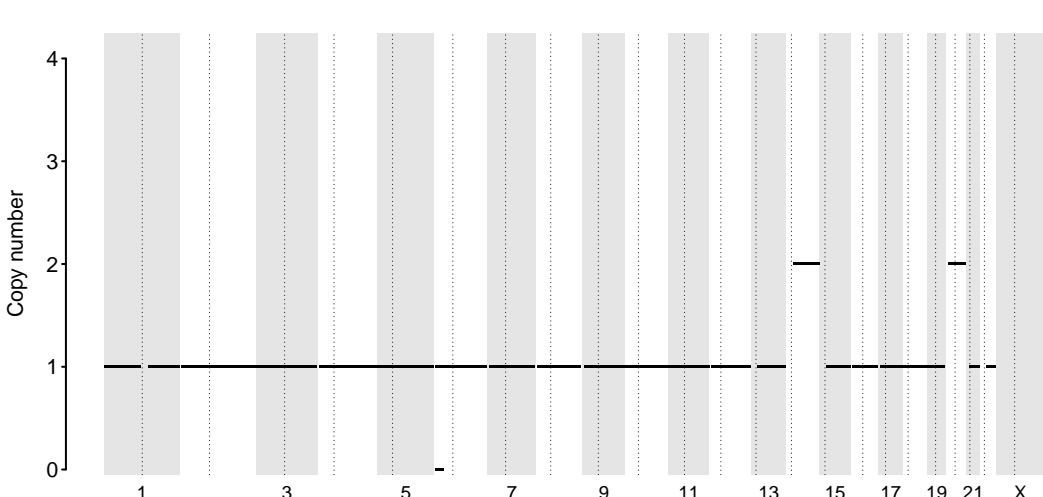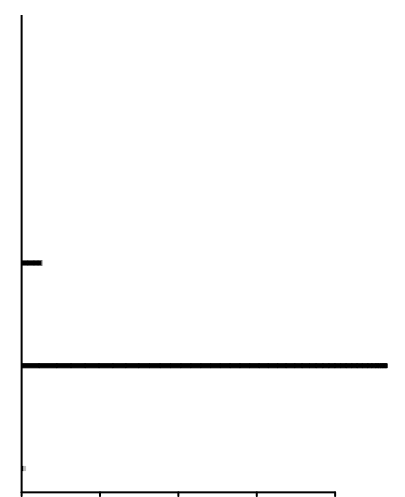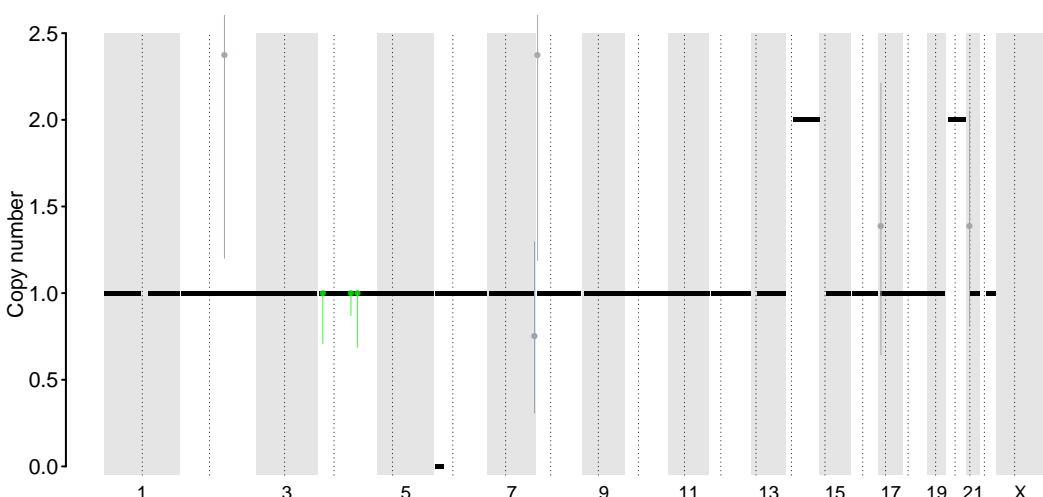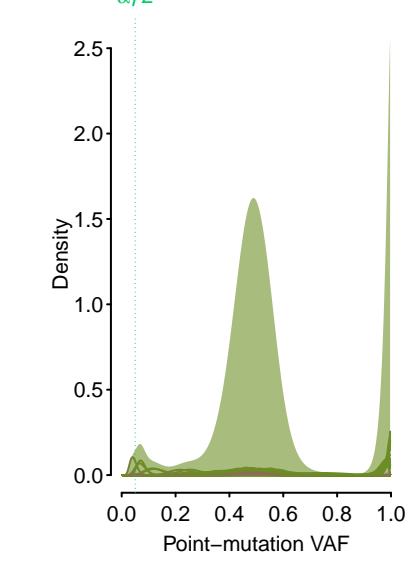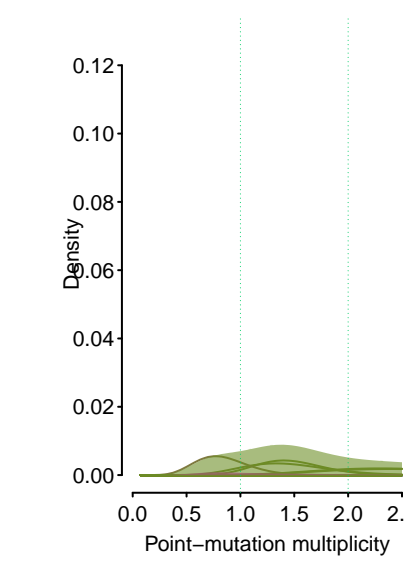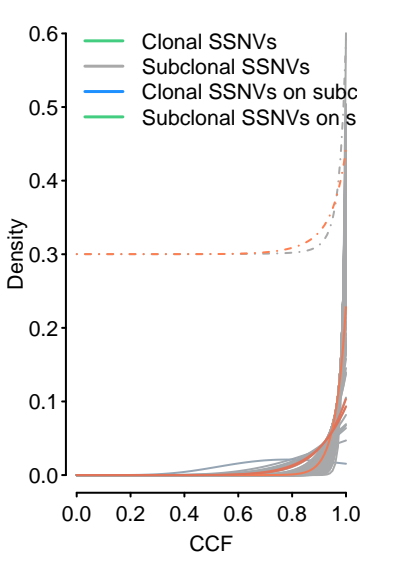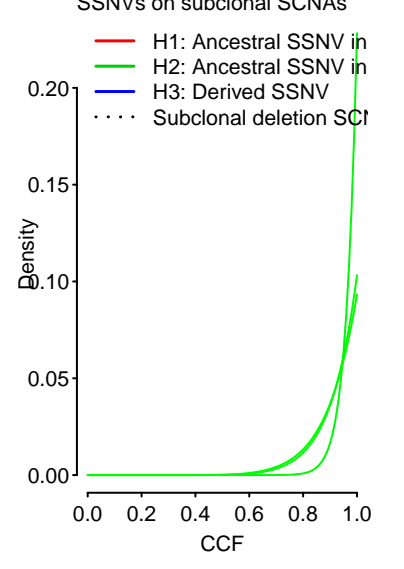

Sample 13

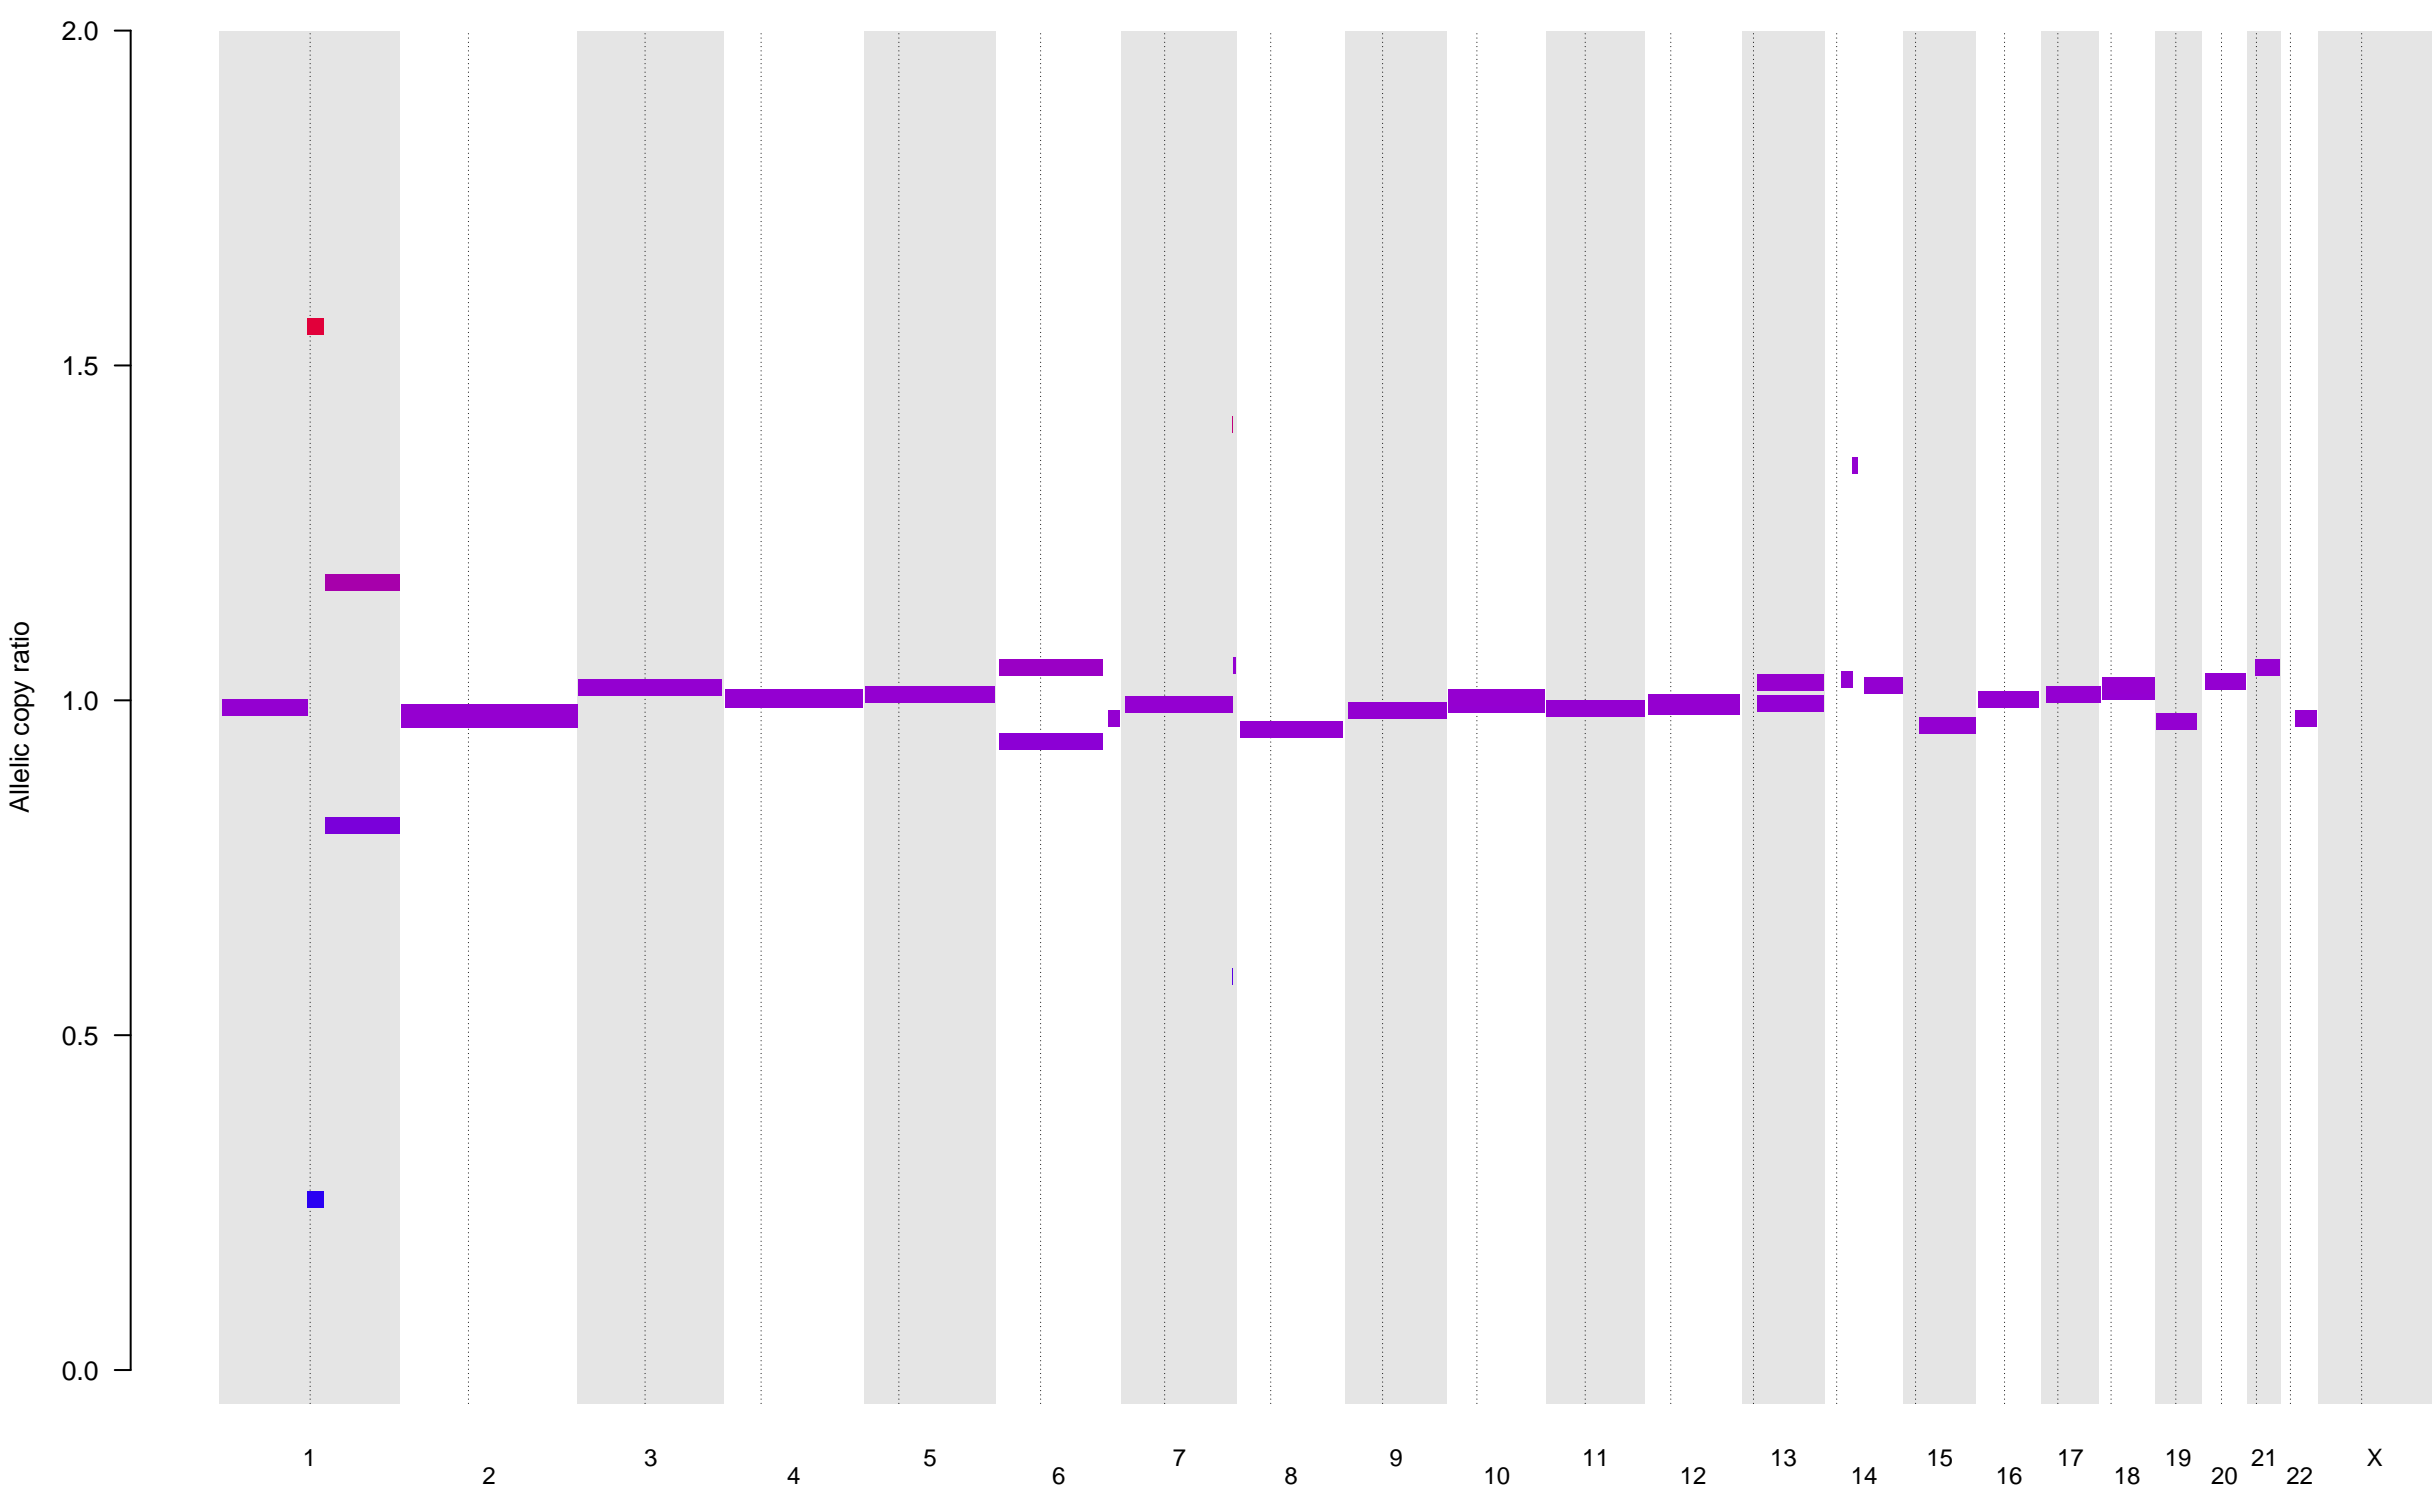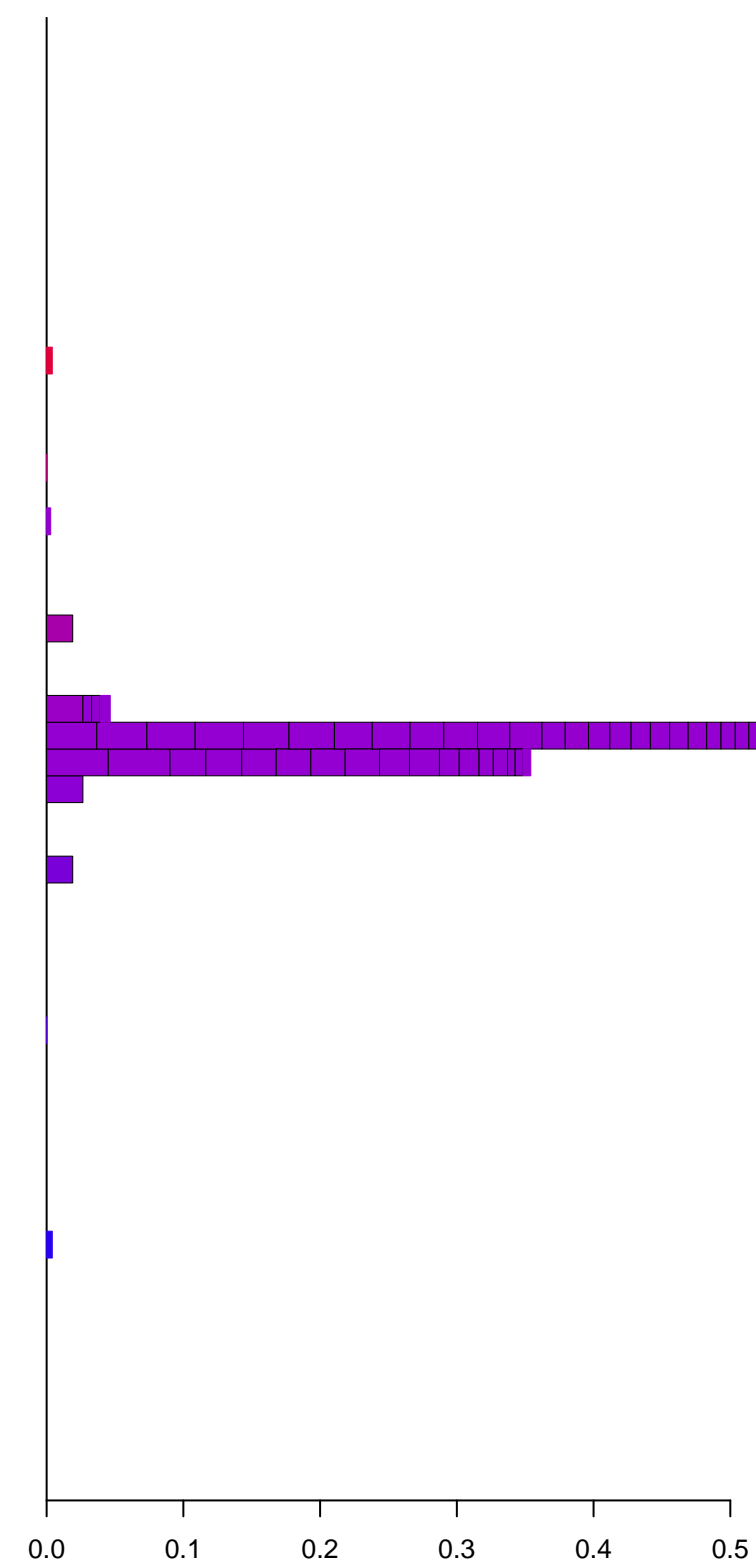



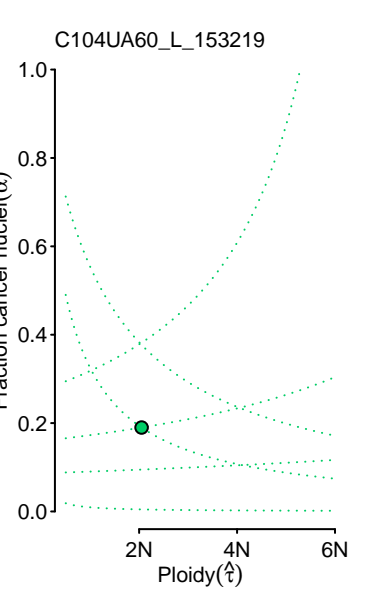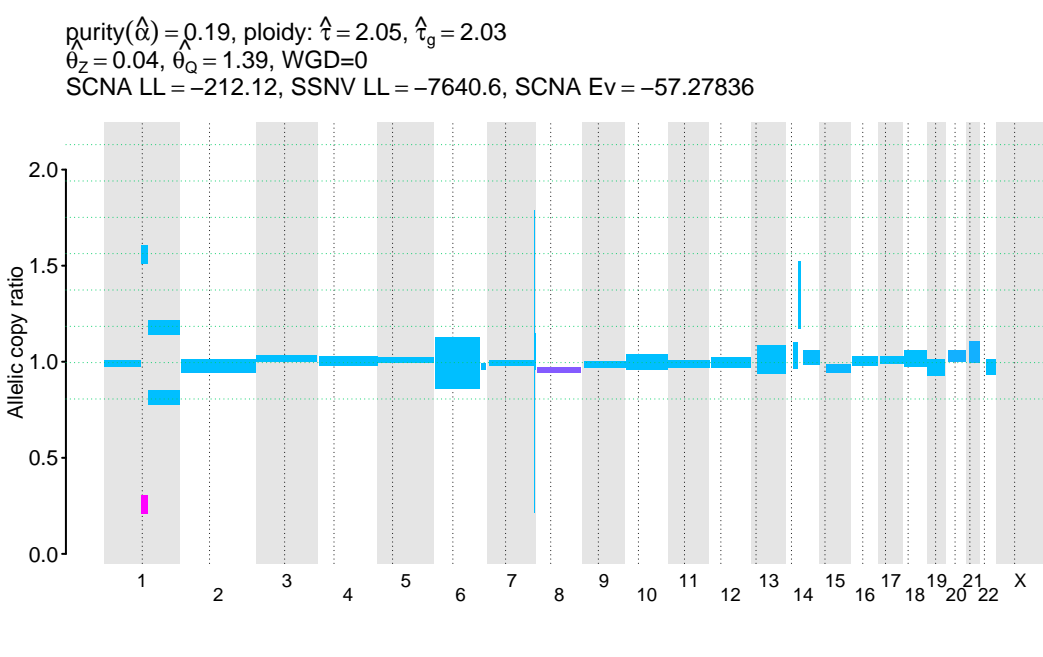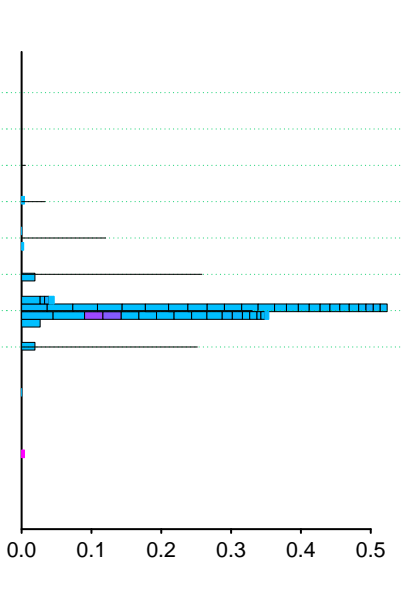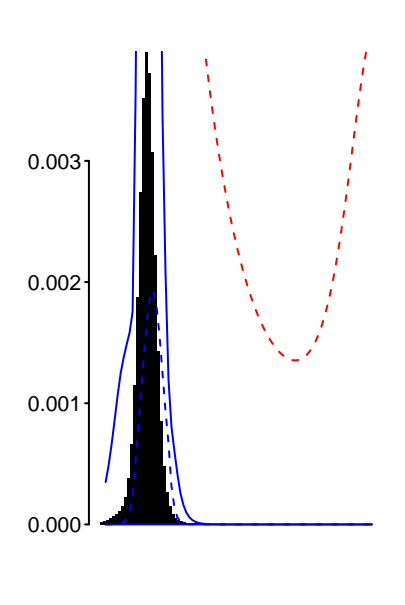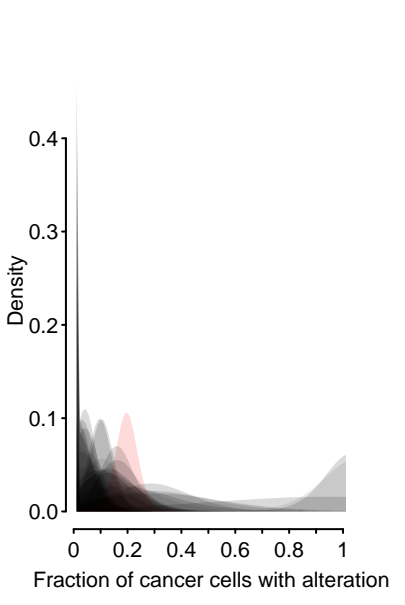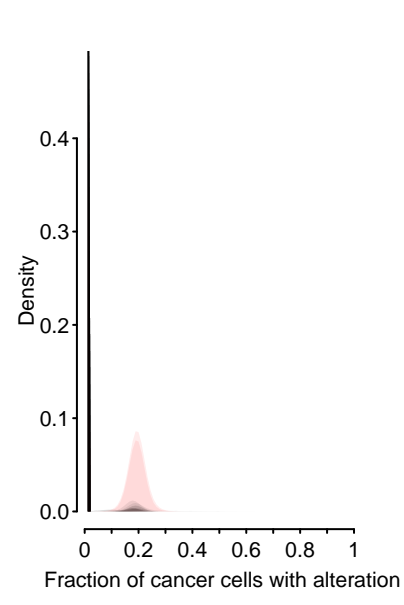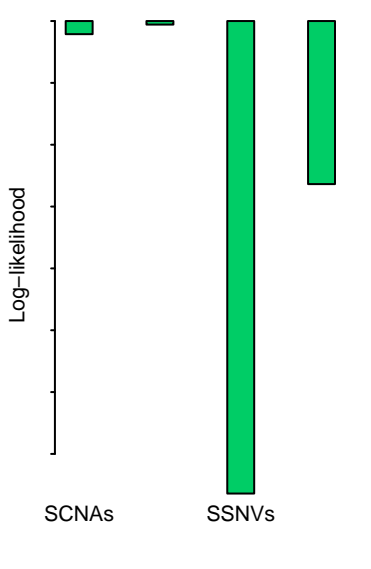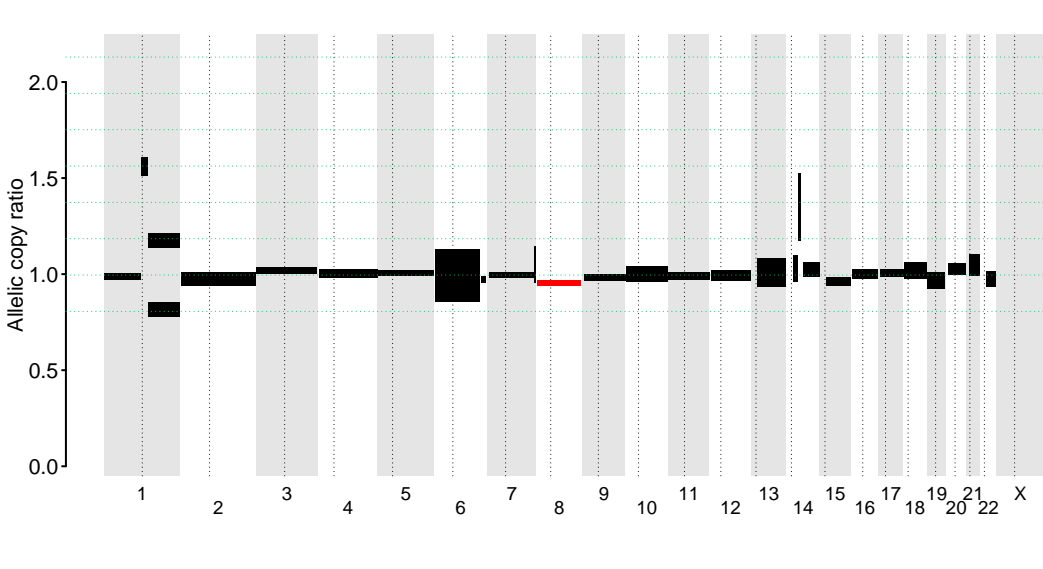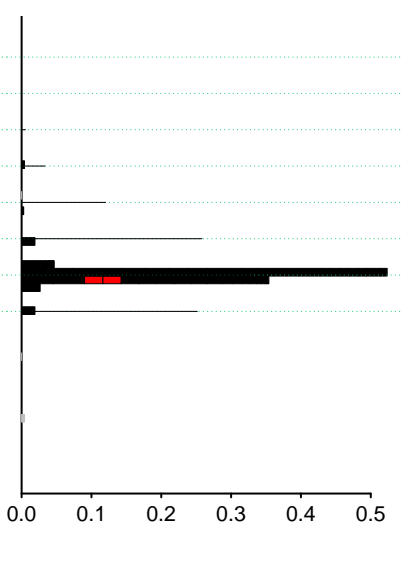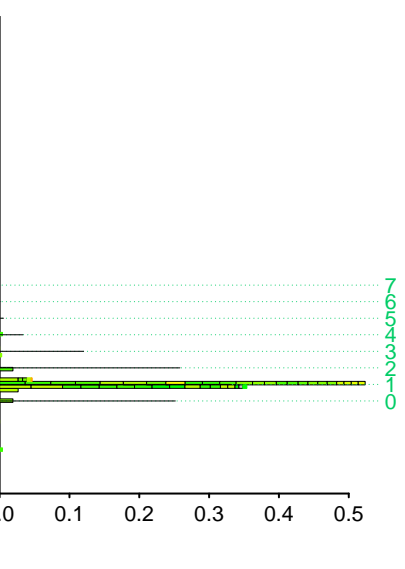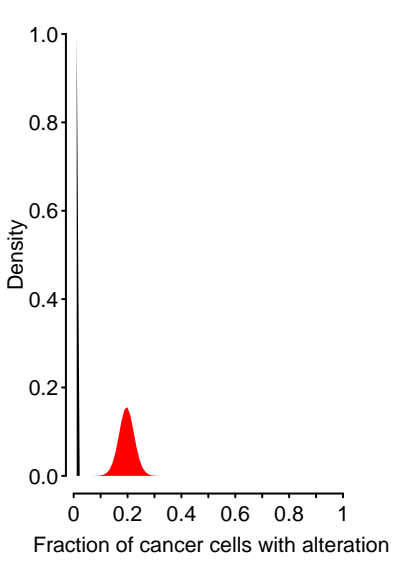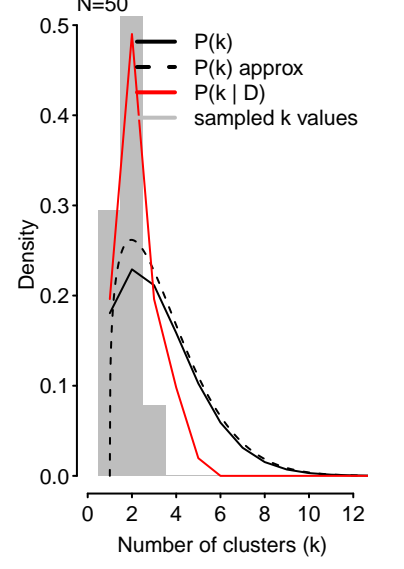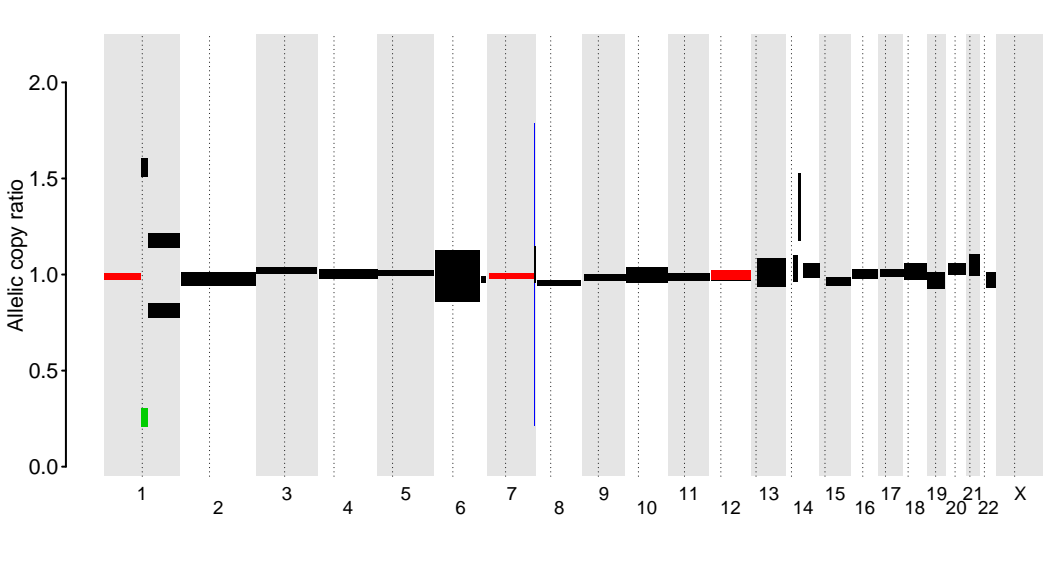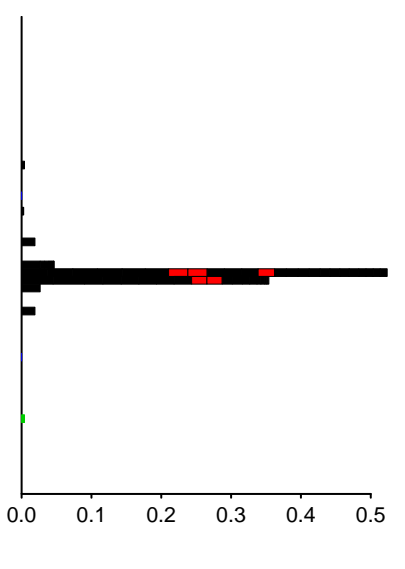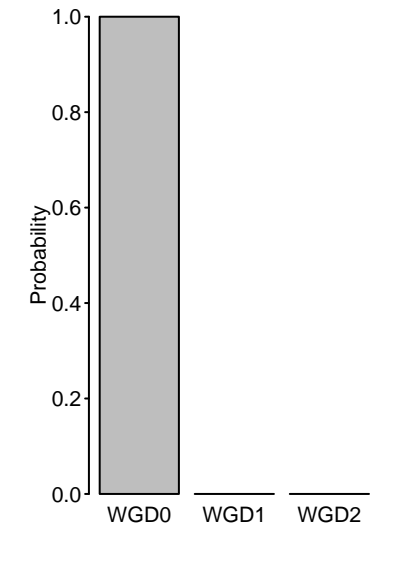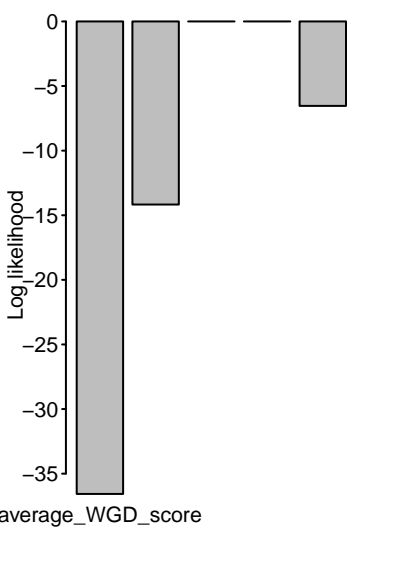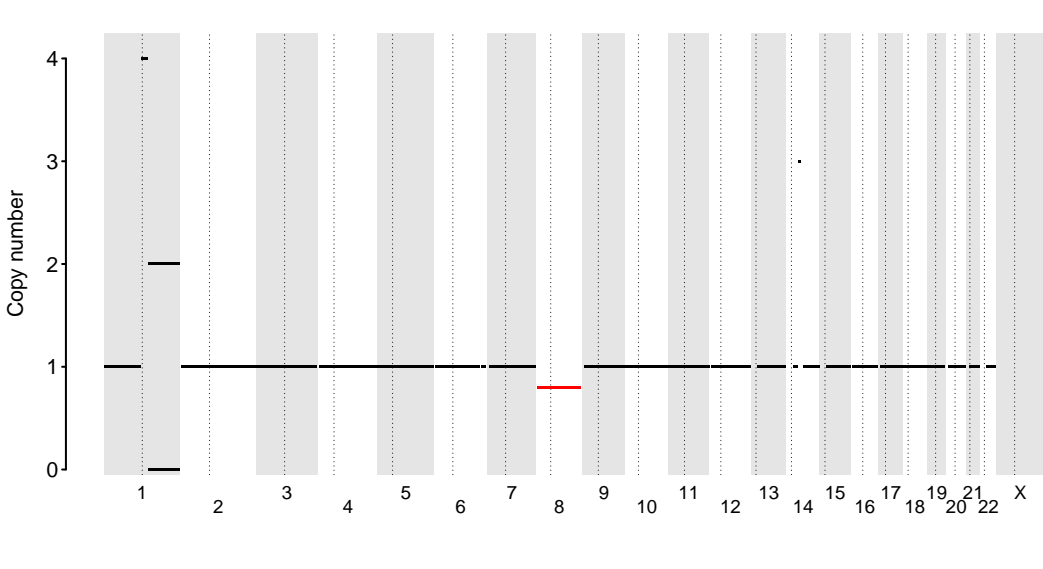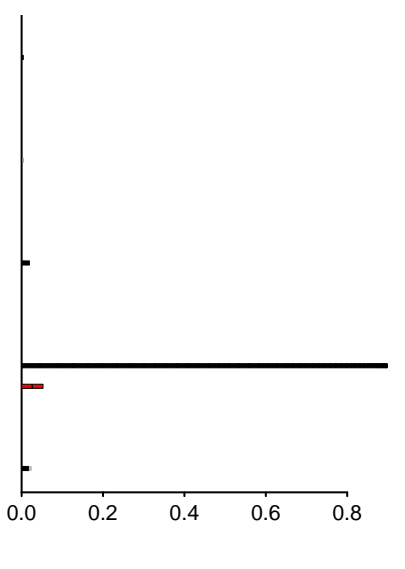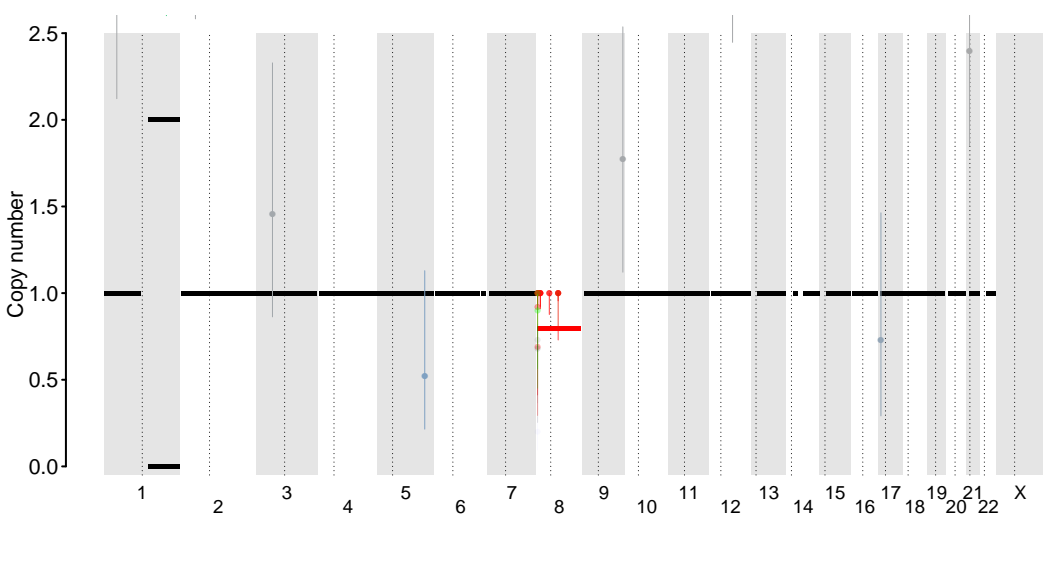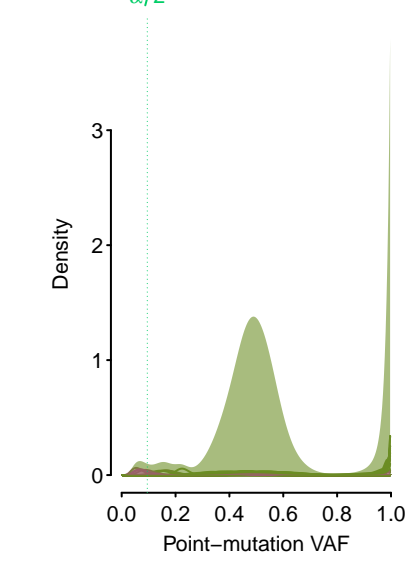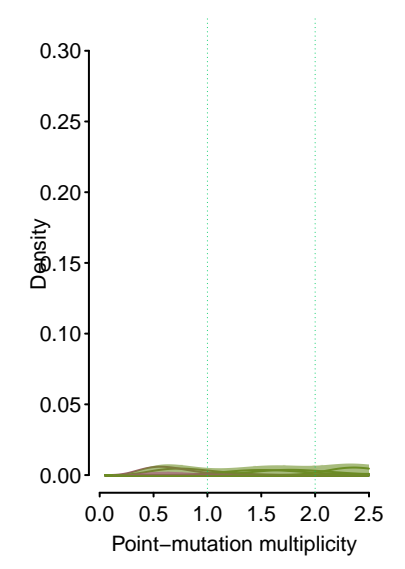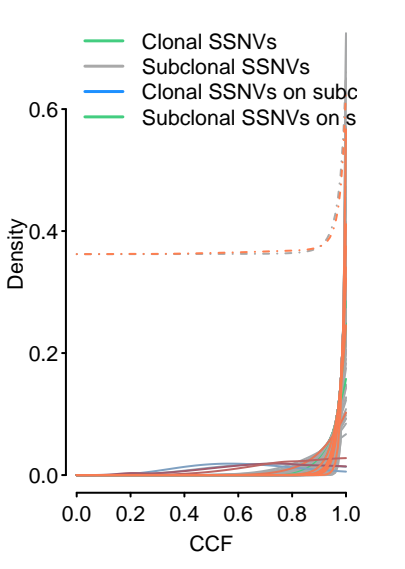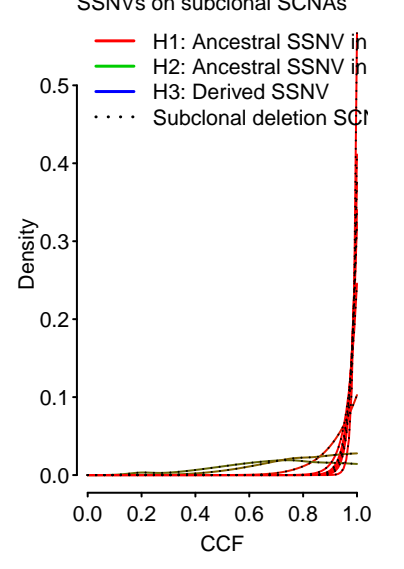



Sample 15

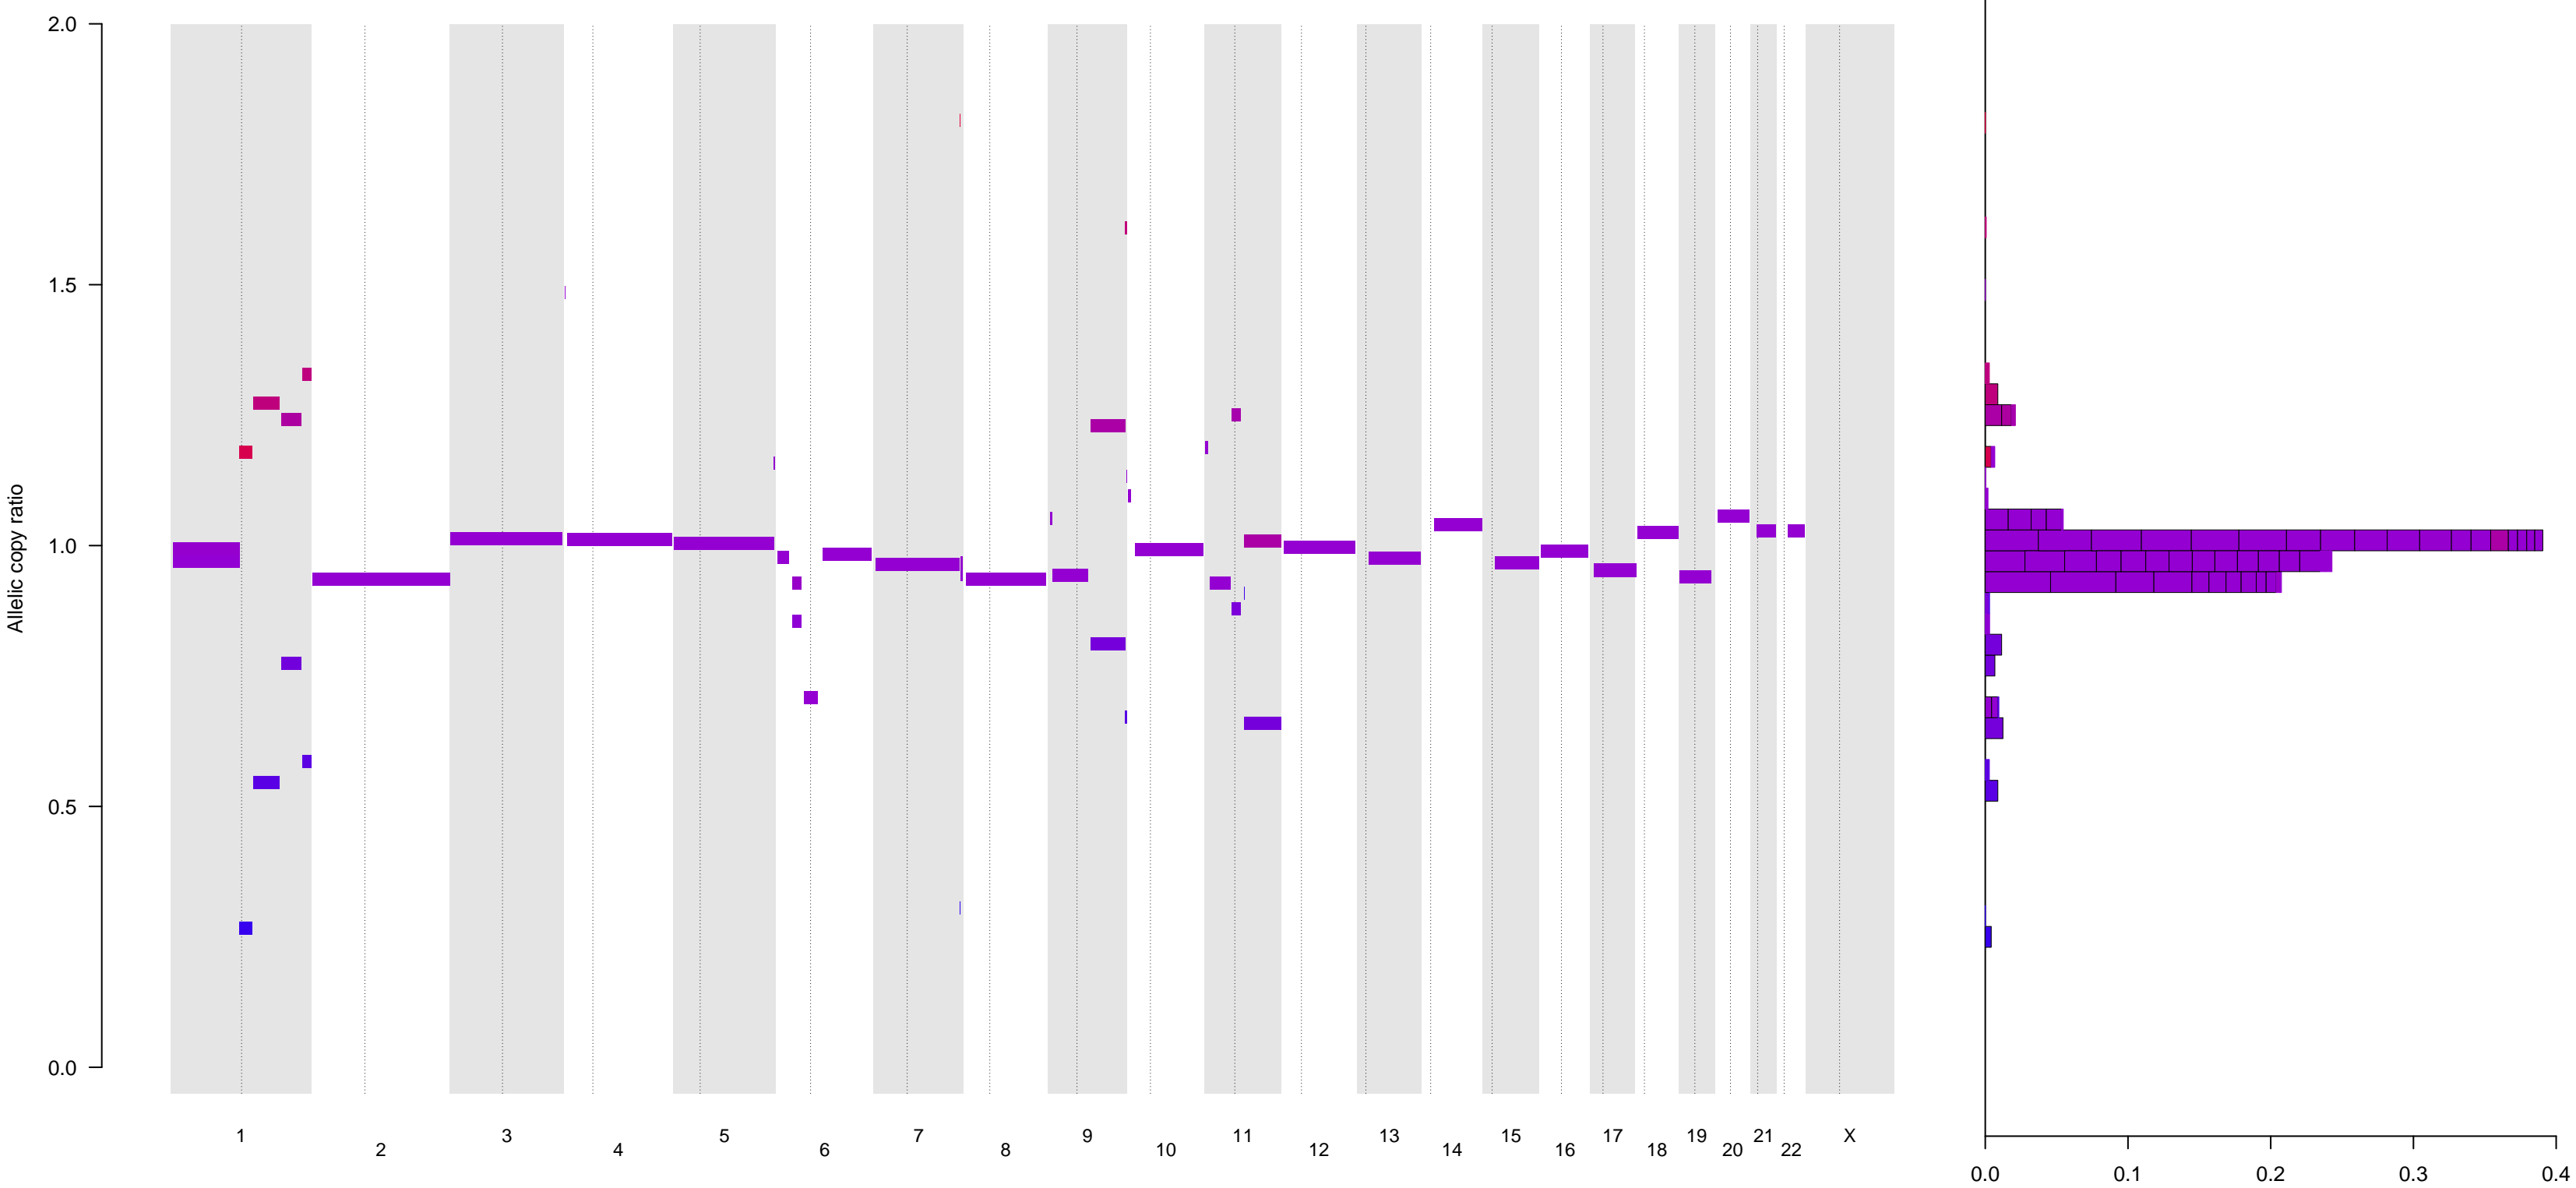

$\hat{p}_x = 0.4$ , ploidy:  $\hat{t} = 2.07$ ,  $\hat{t}_g = 1.98$   
 $\hat{\theta}_z = 0.25$ ,  $\hat{\theta}_a = 1.285$ , WGD=0  
 SCNA LL = -339.23, SSNV LL = -4256.56, SCNA Ev = -111.9478

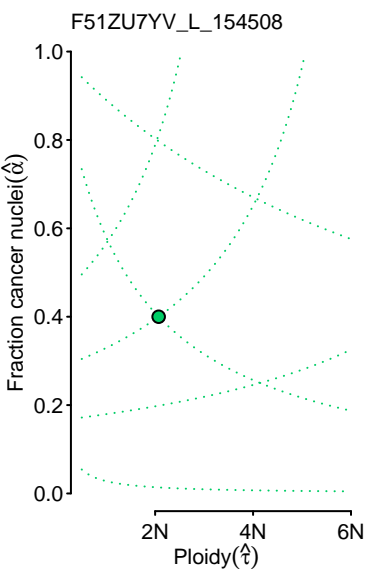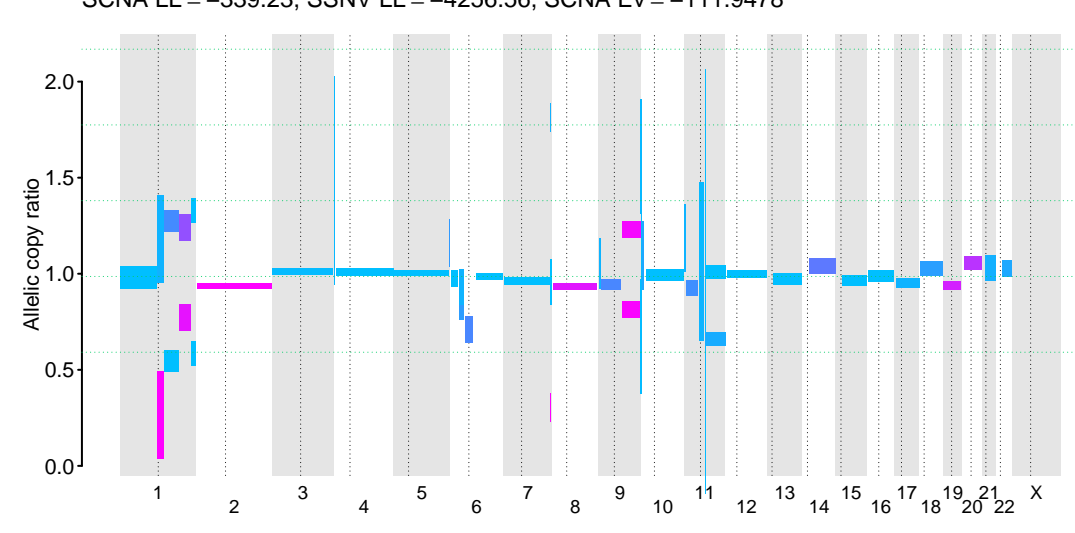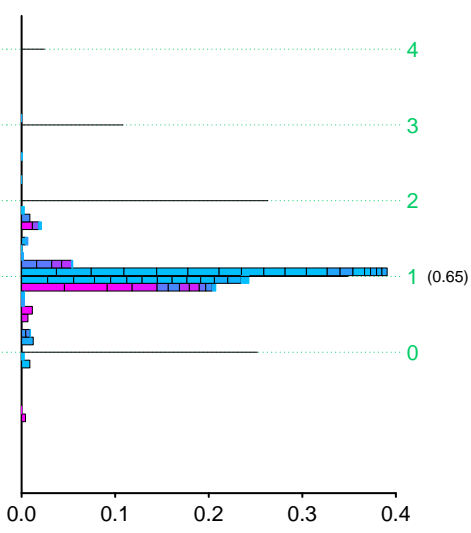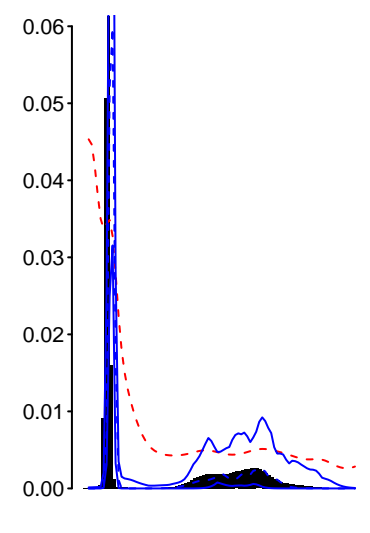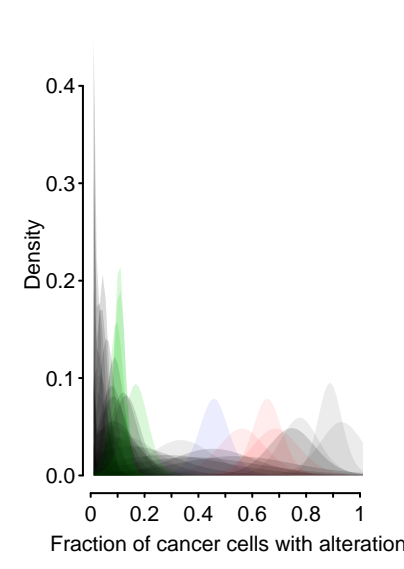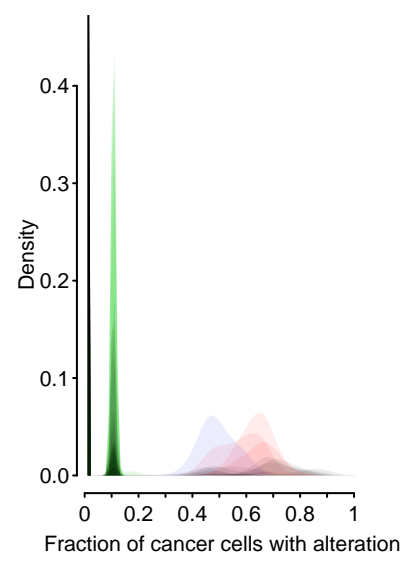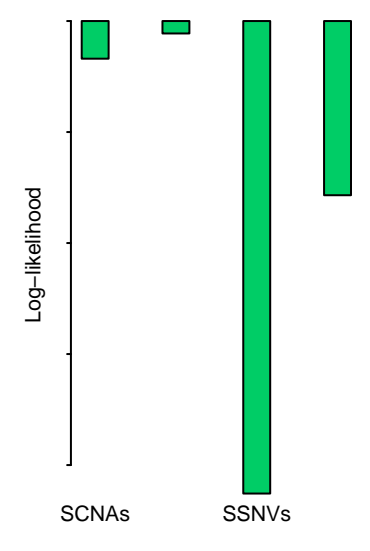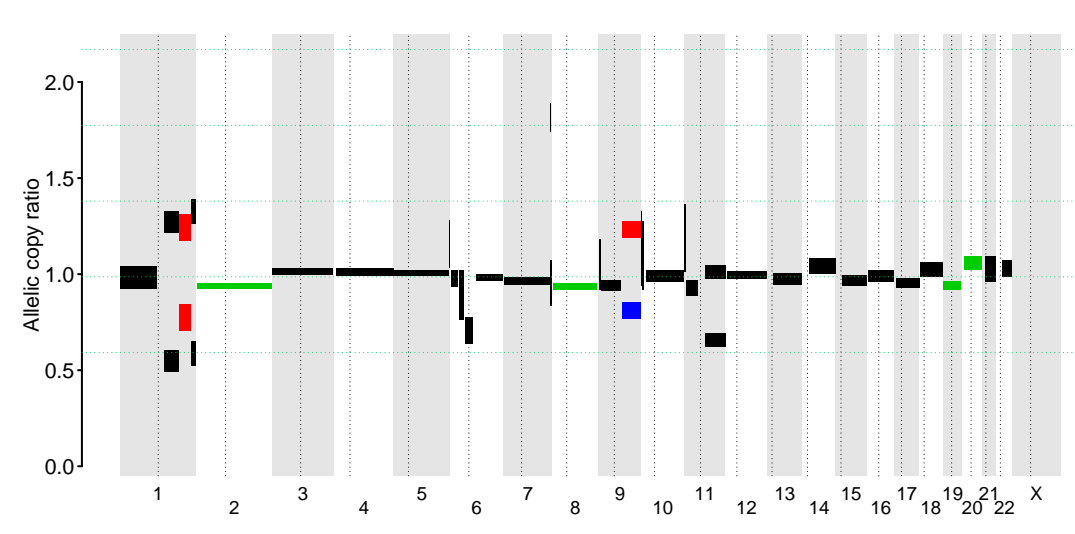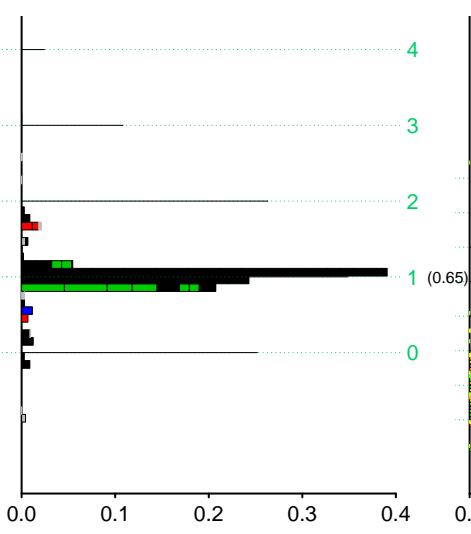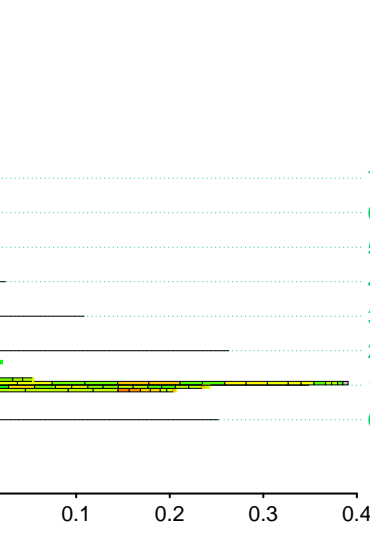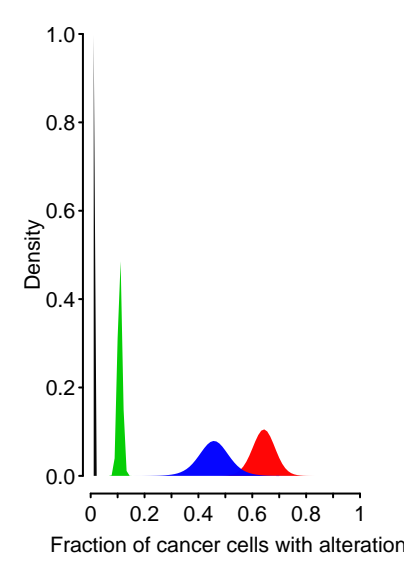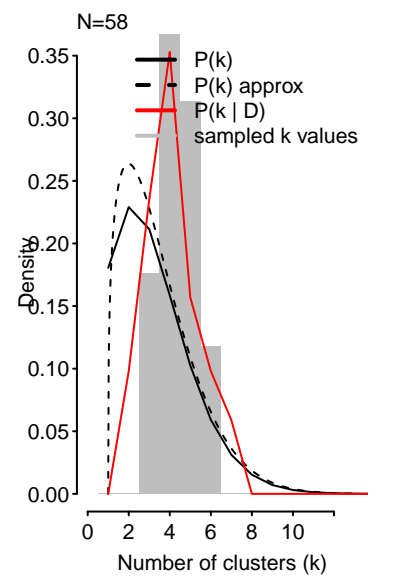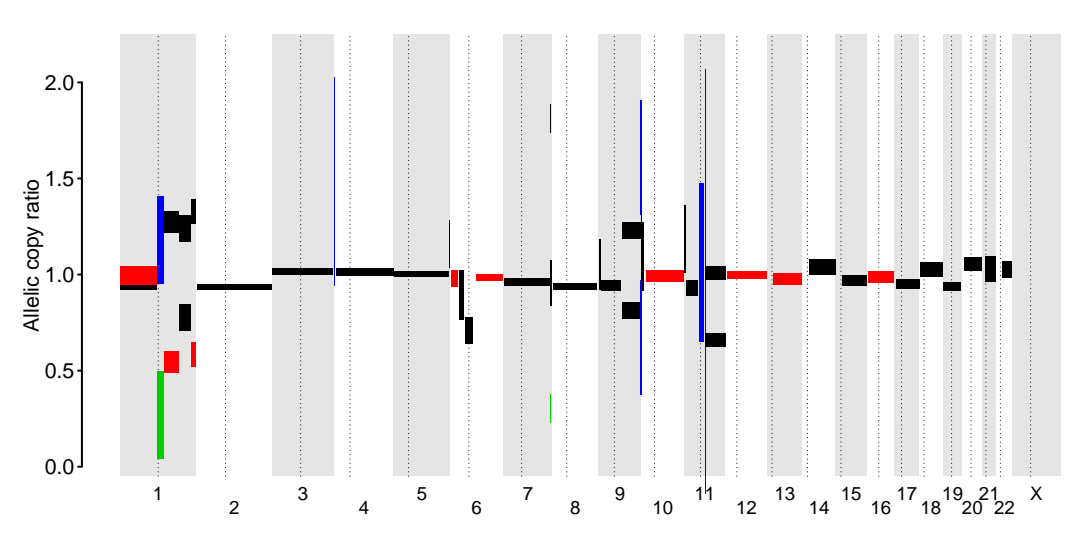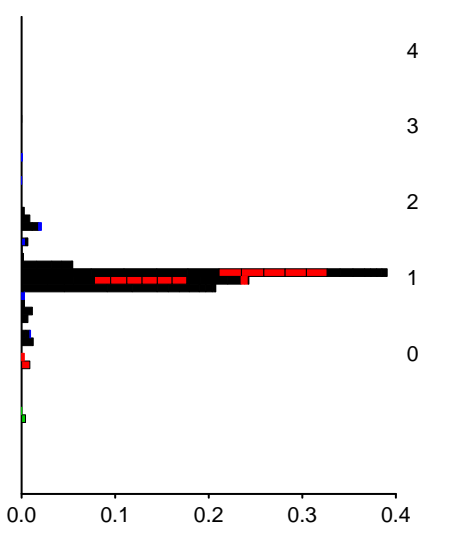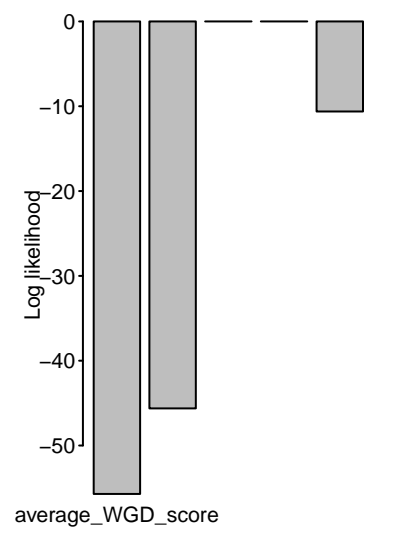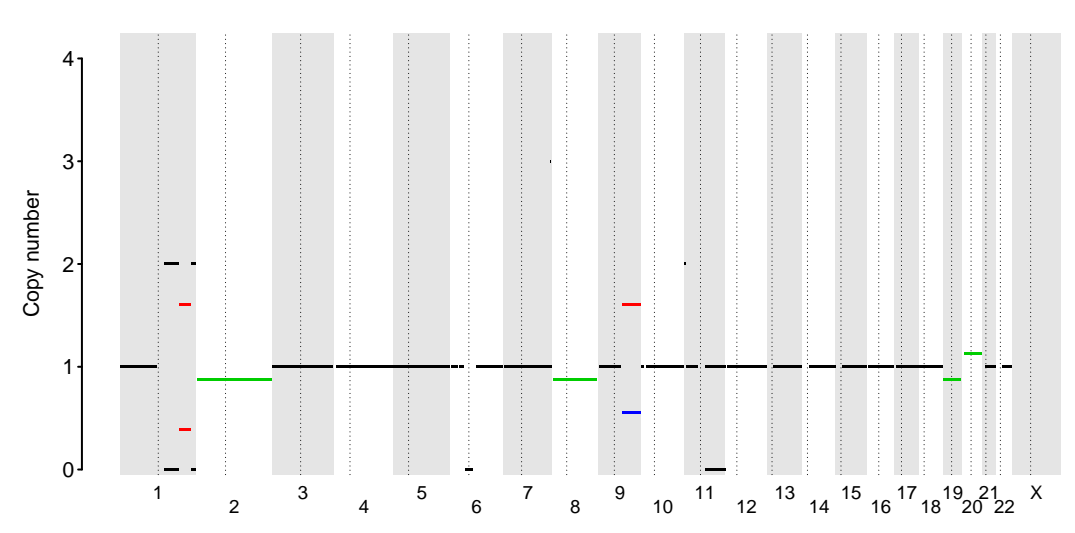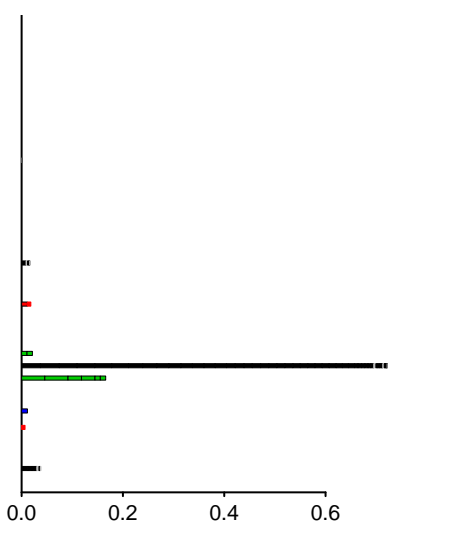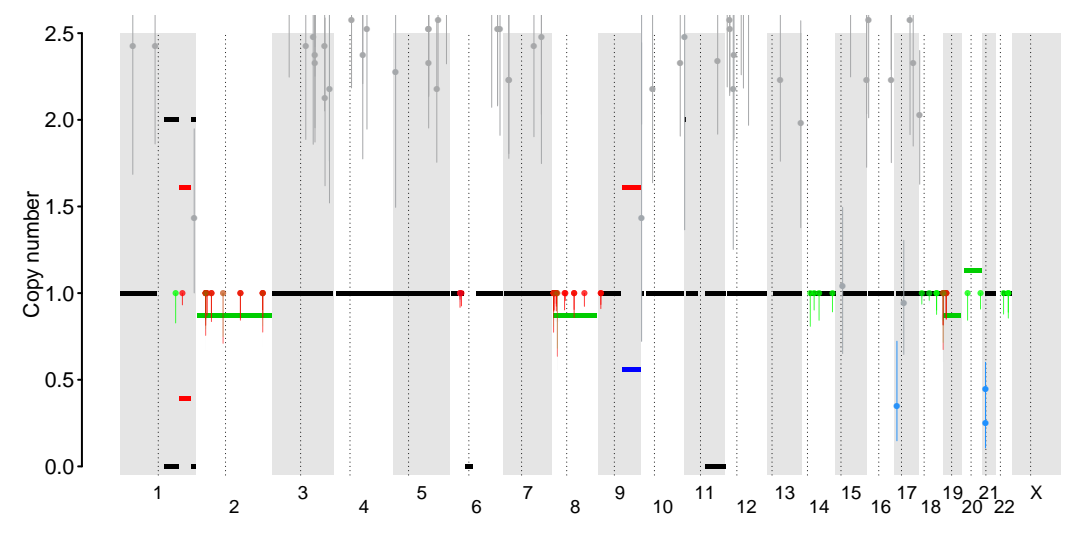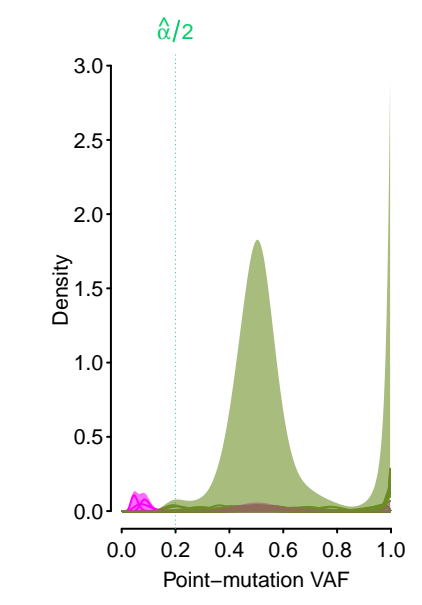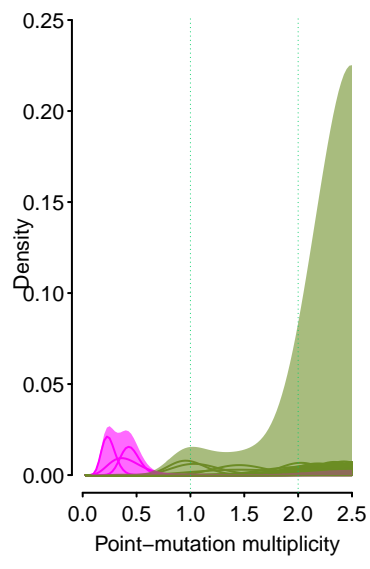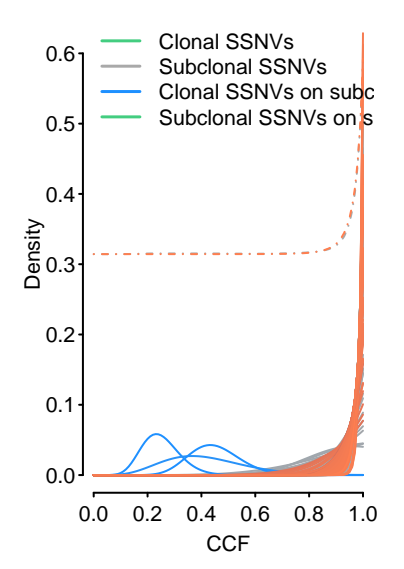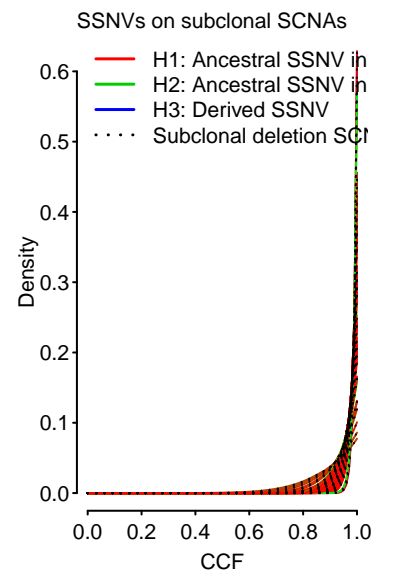

Sample 16

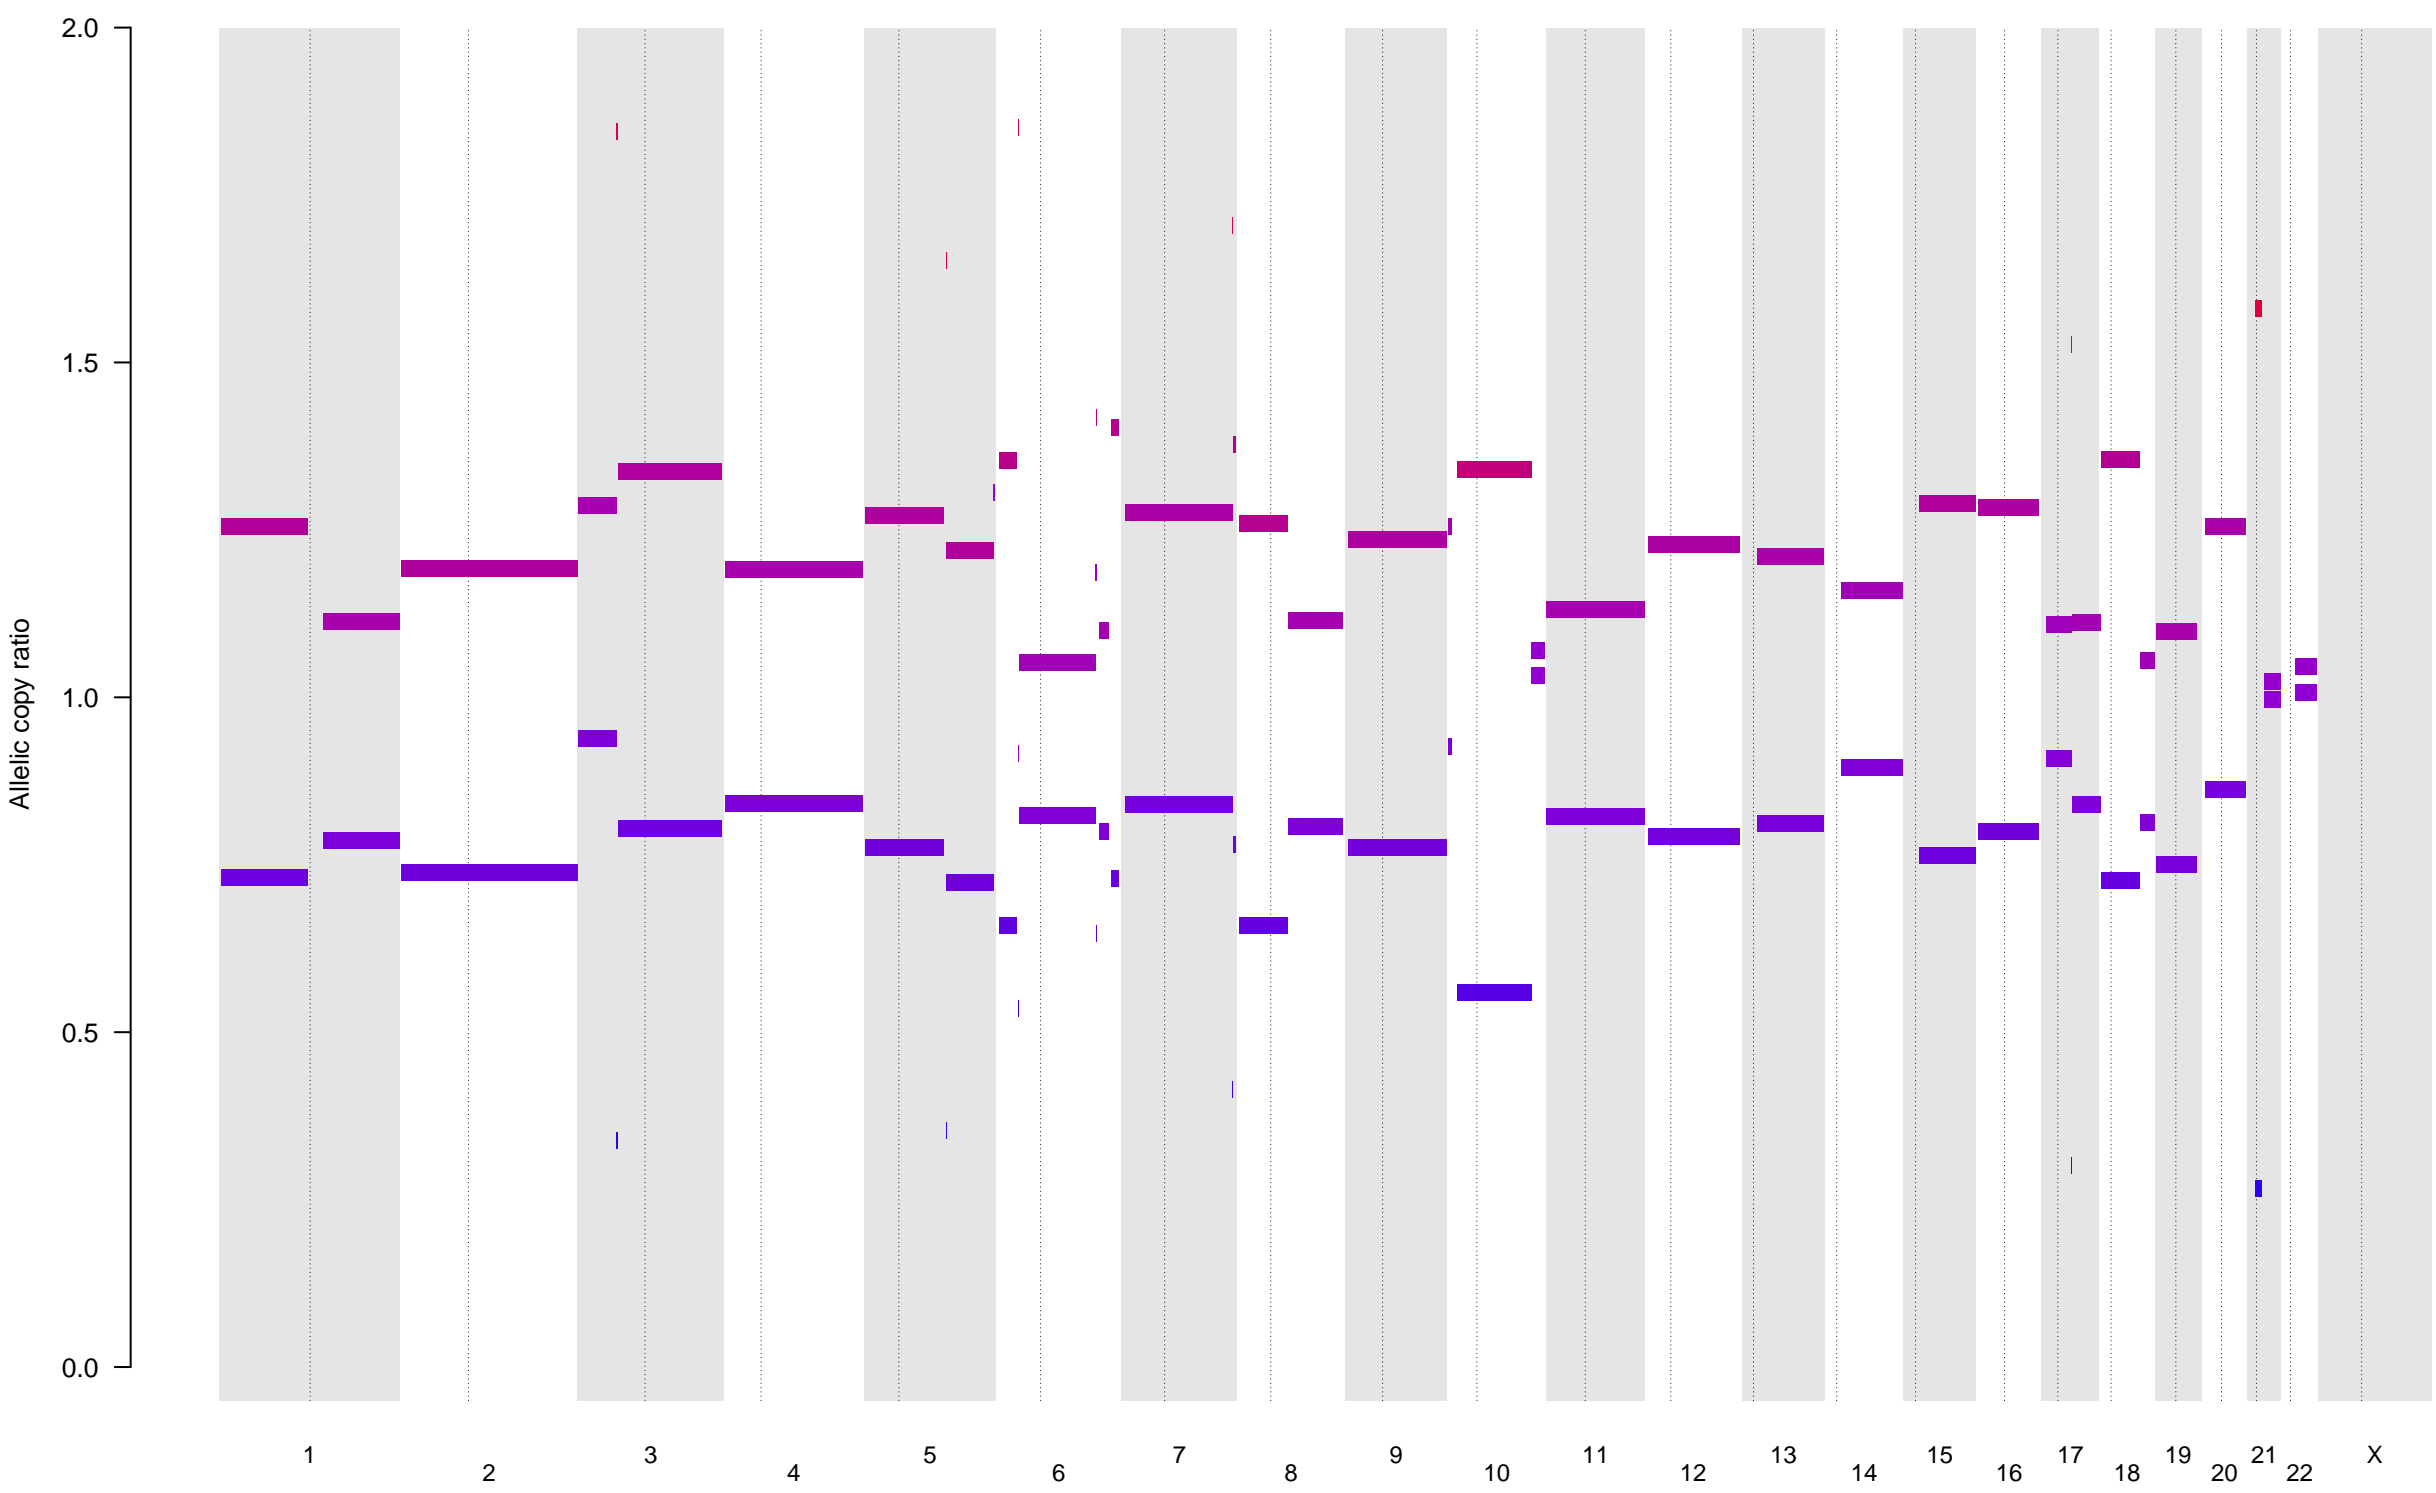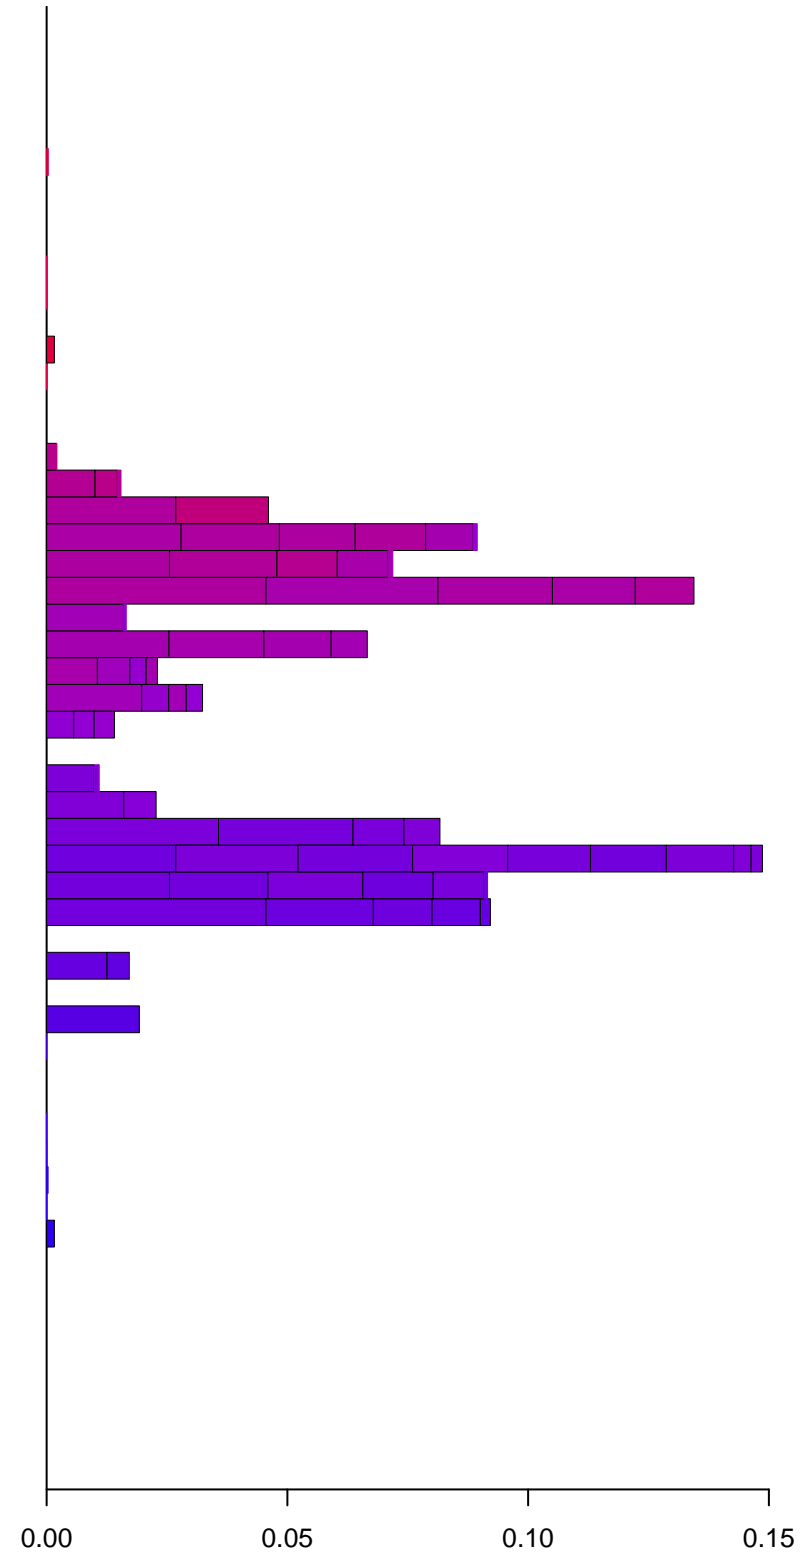

purity( $\hat{\alpha}$ ) = 0.25, ploidy:  $\hat{t} = 3.89, \hat{t}_g = 3.97$   
 $\theta_z = 0.06, \theta_a = 2.369, WGD=2$   
 SCNA LL = -410.08, SSNV LL = -2340.88, SCNA Ev = -142.8704

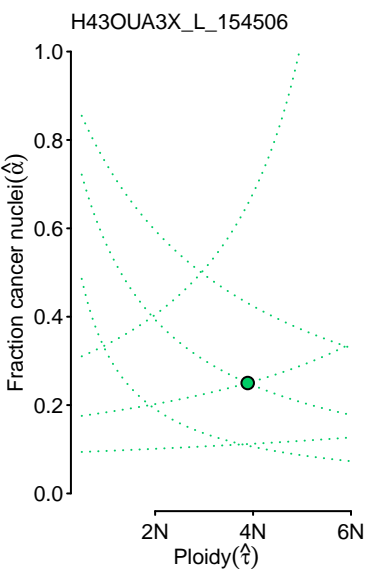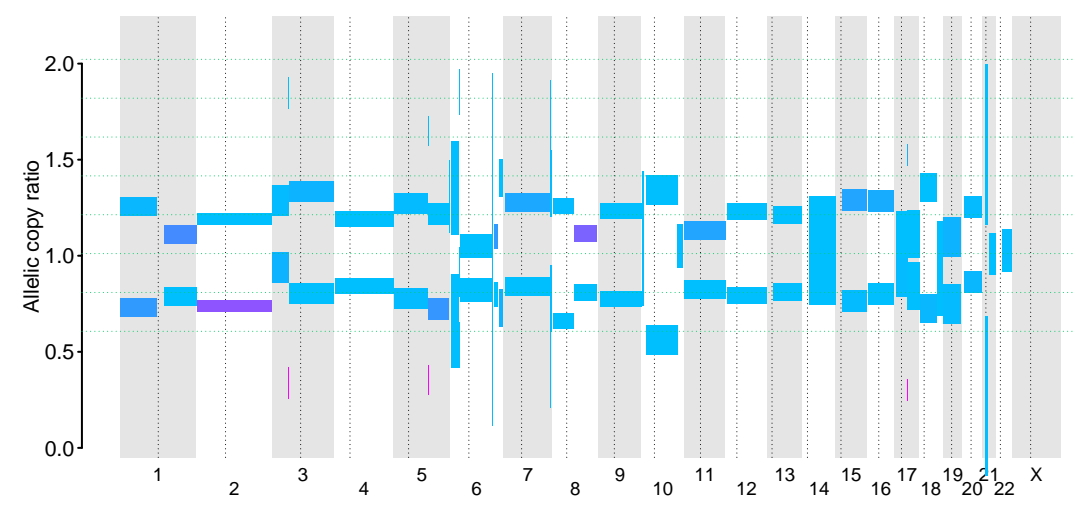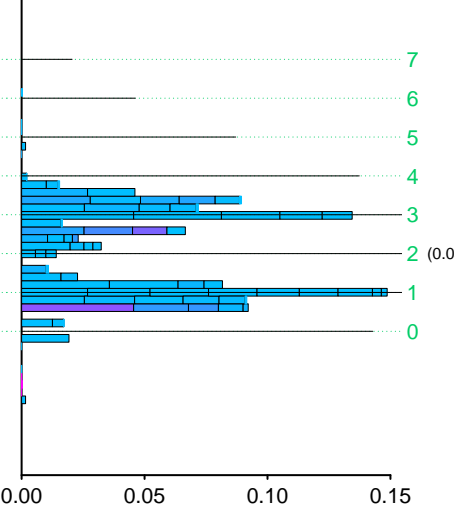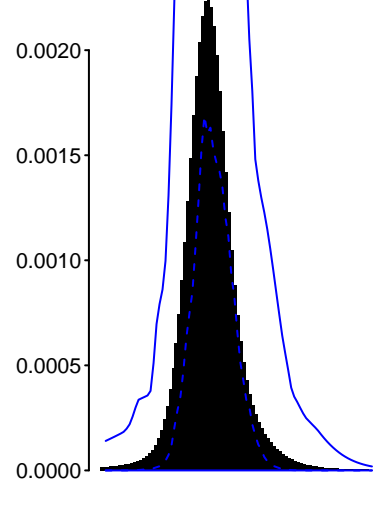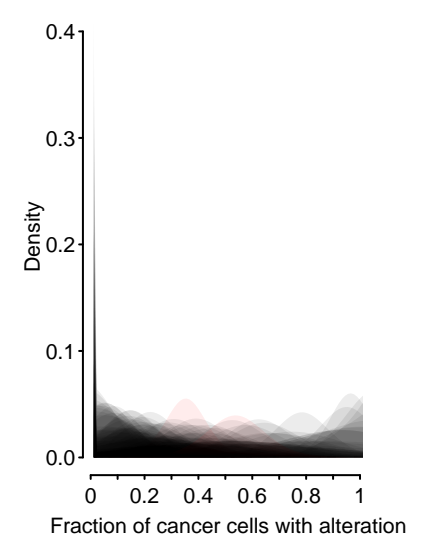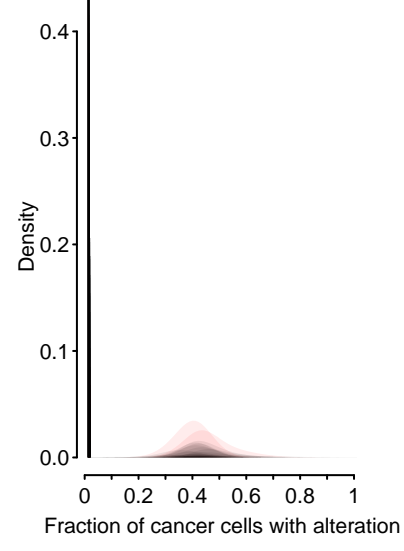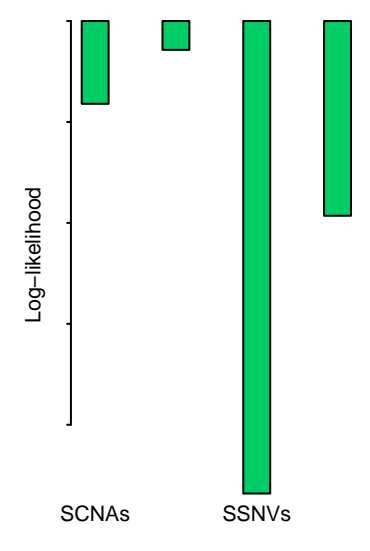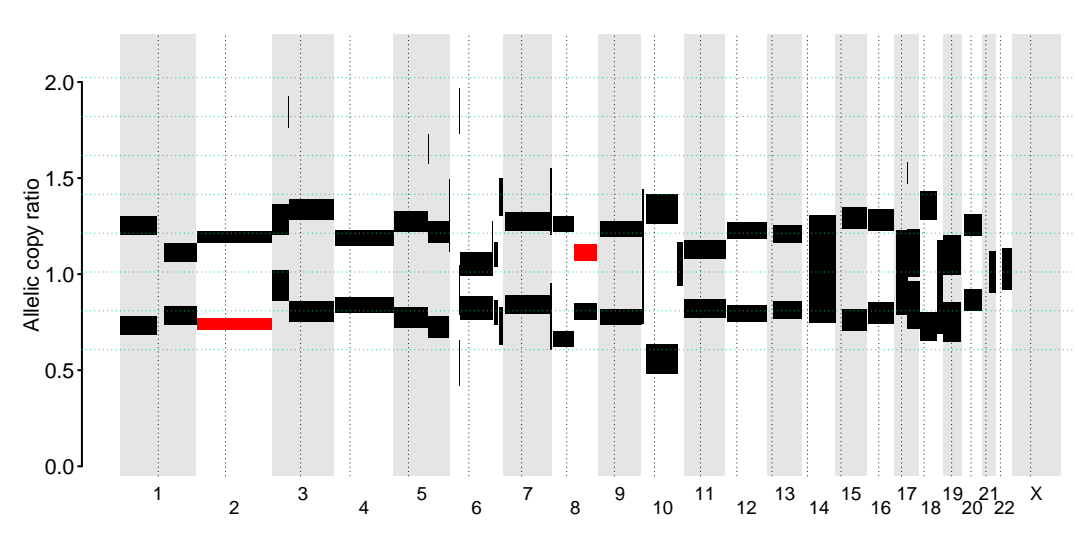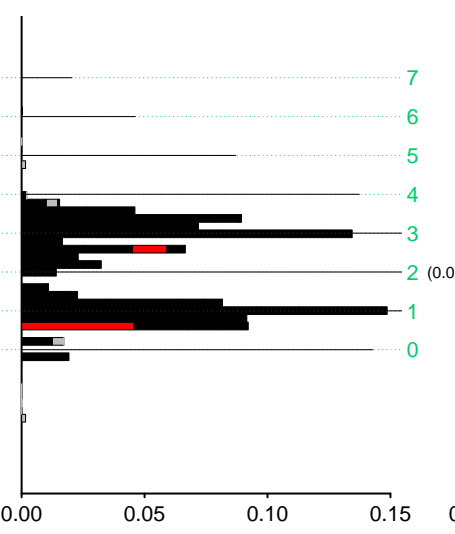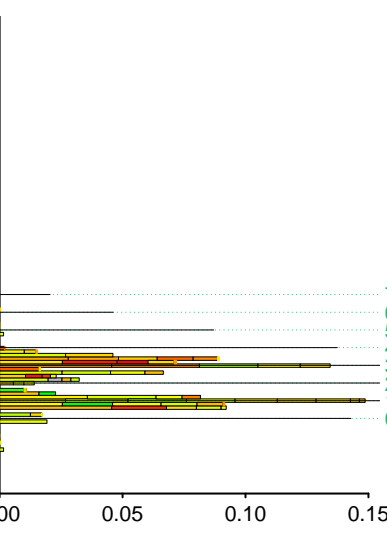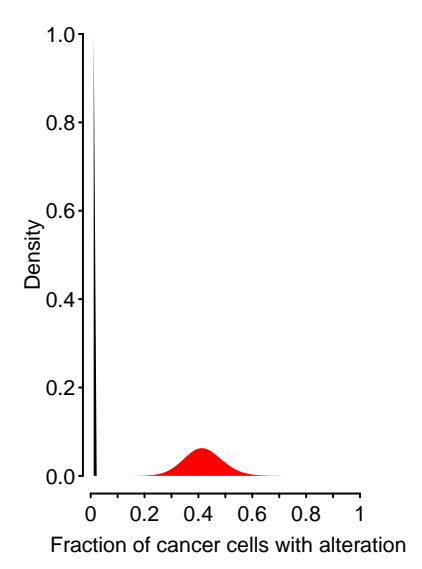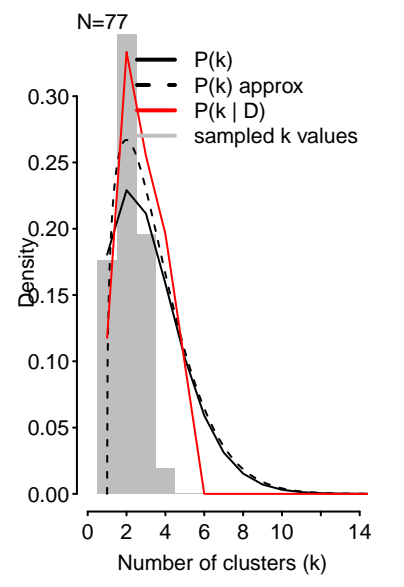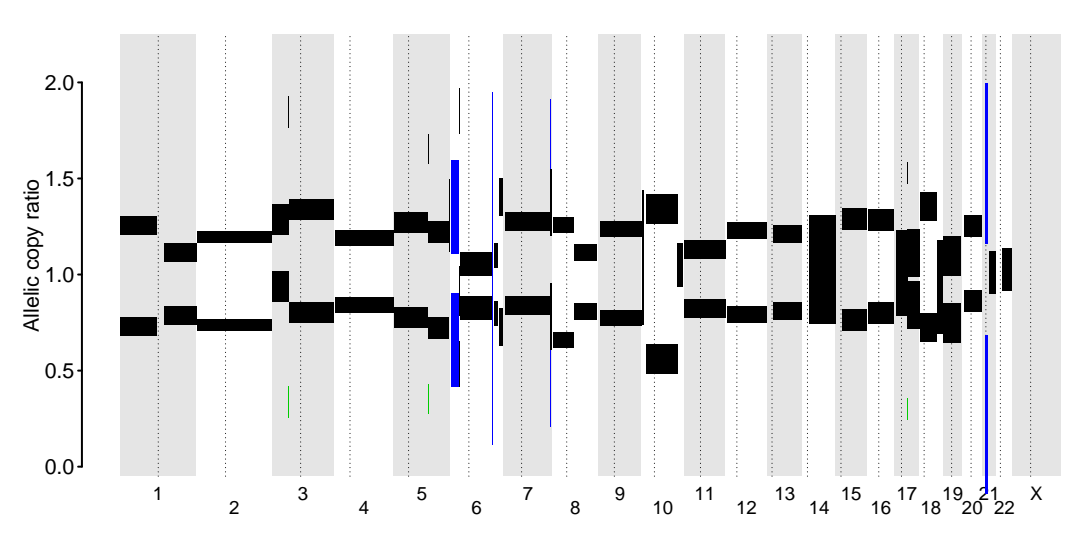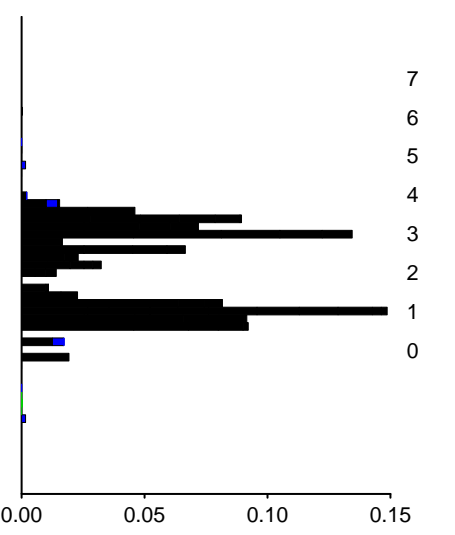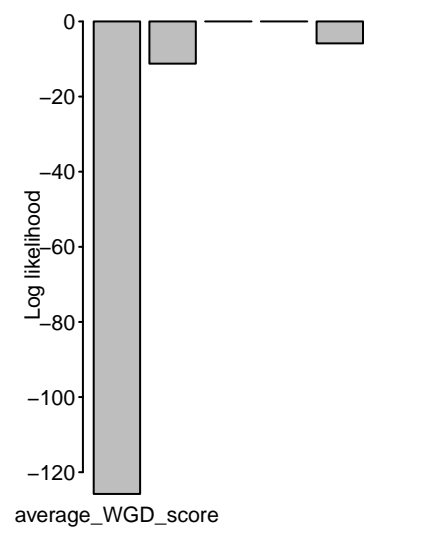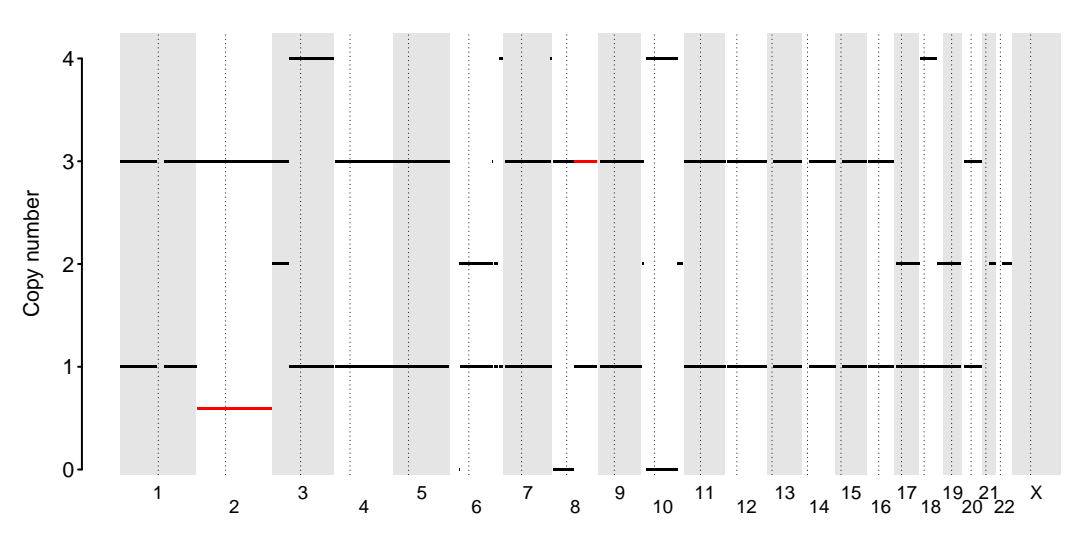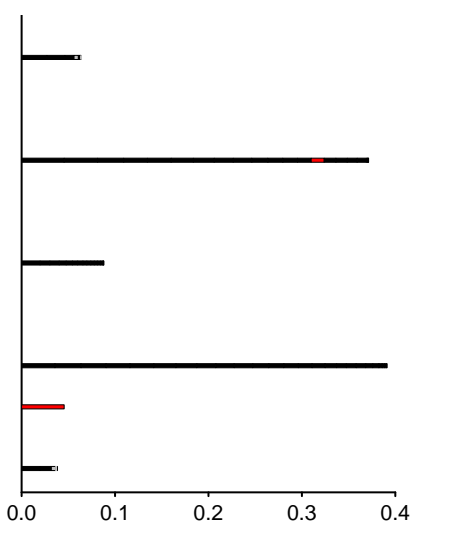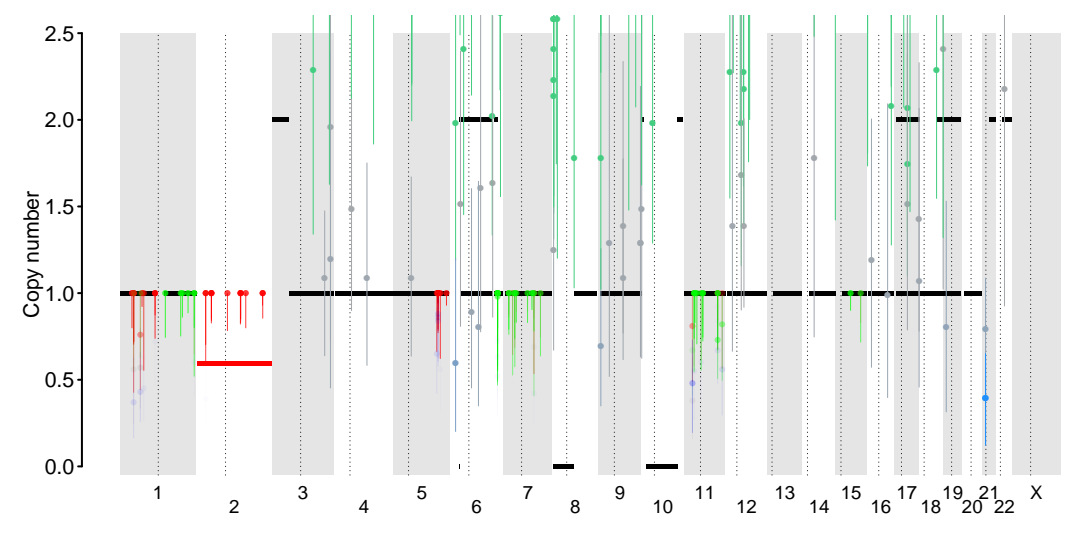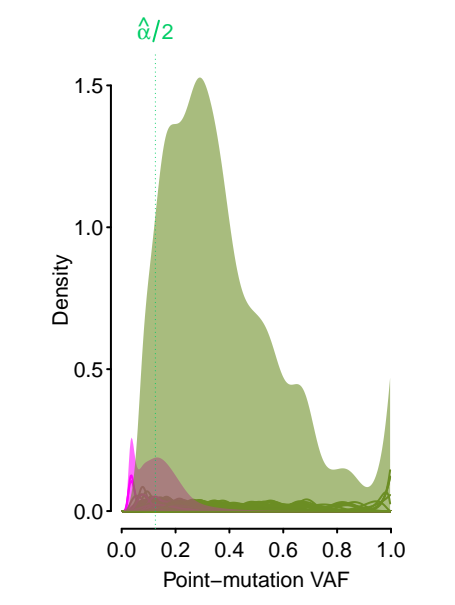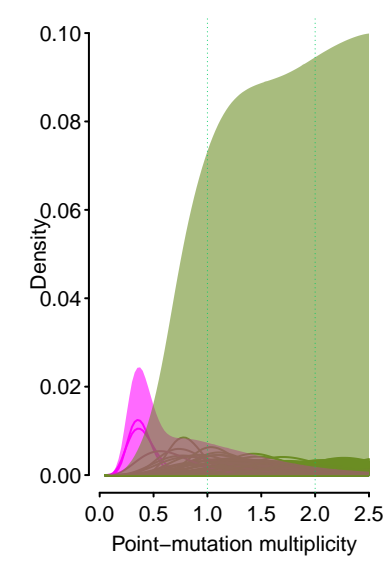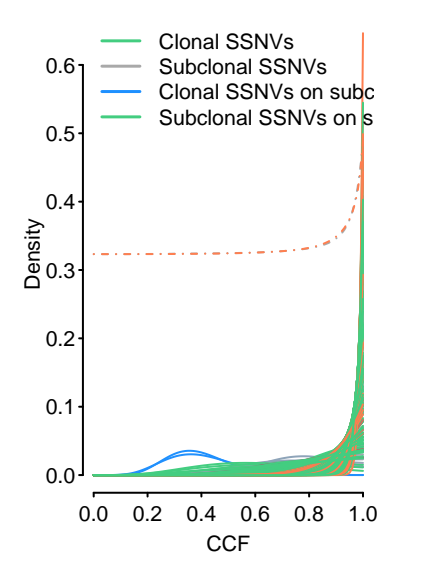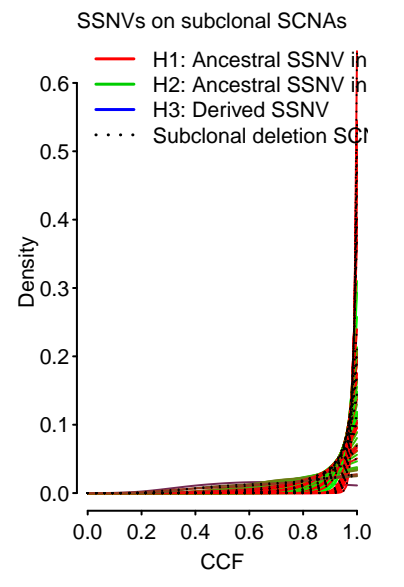

Sample 17

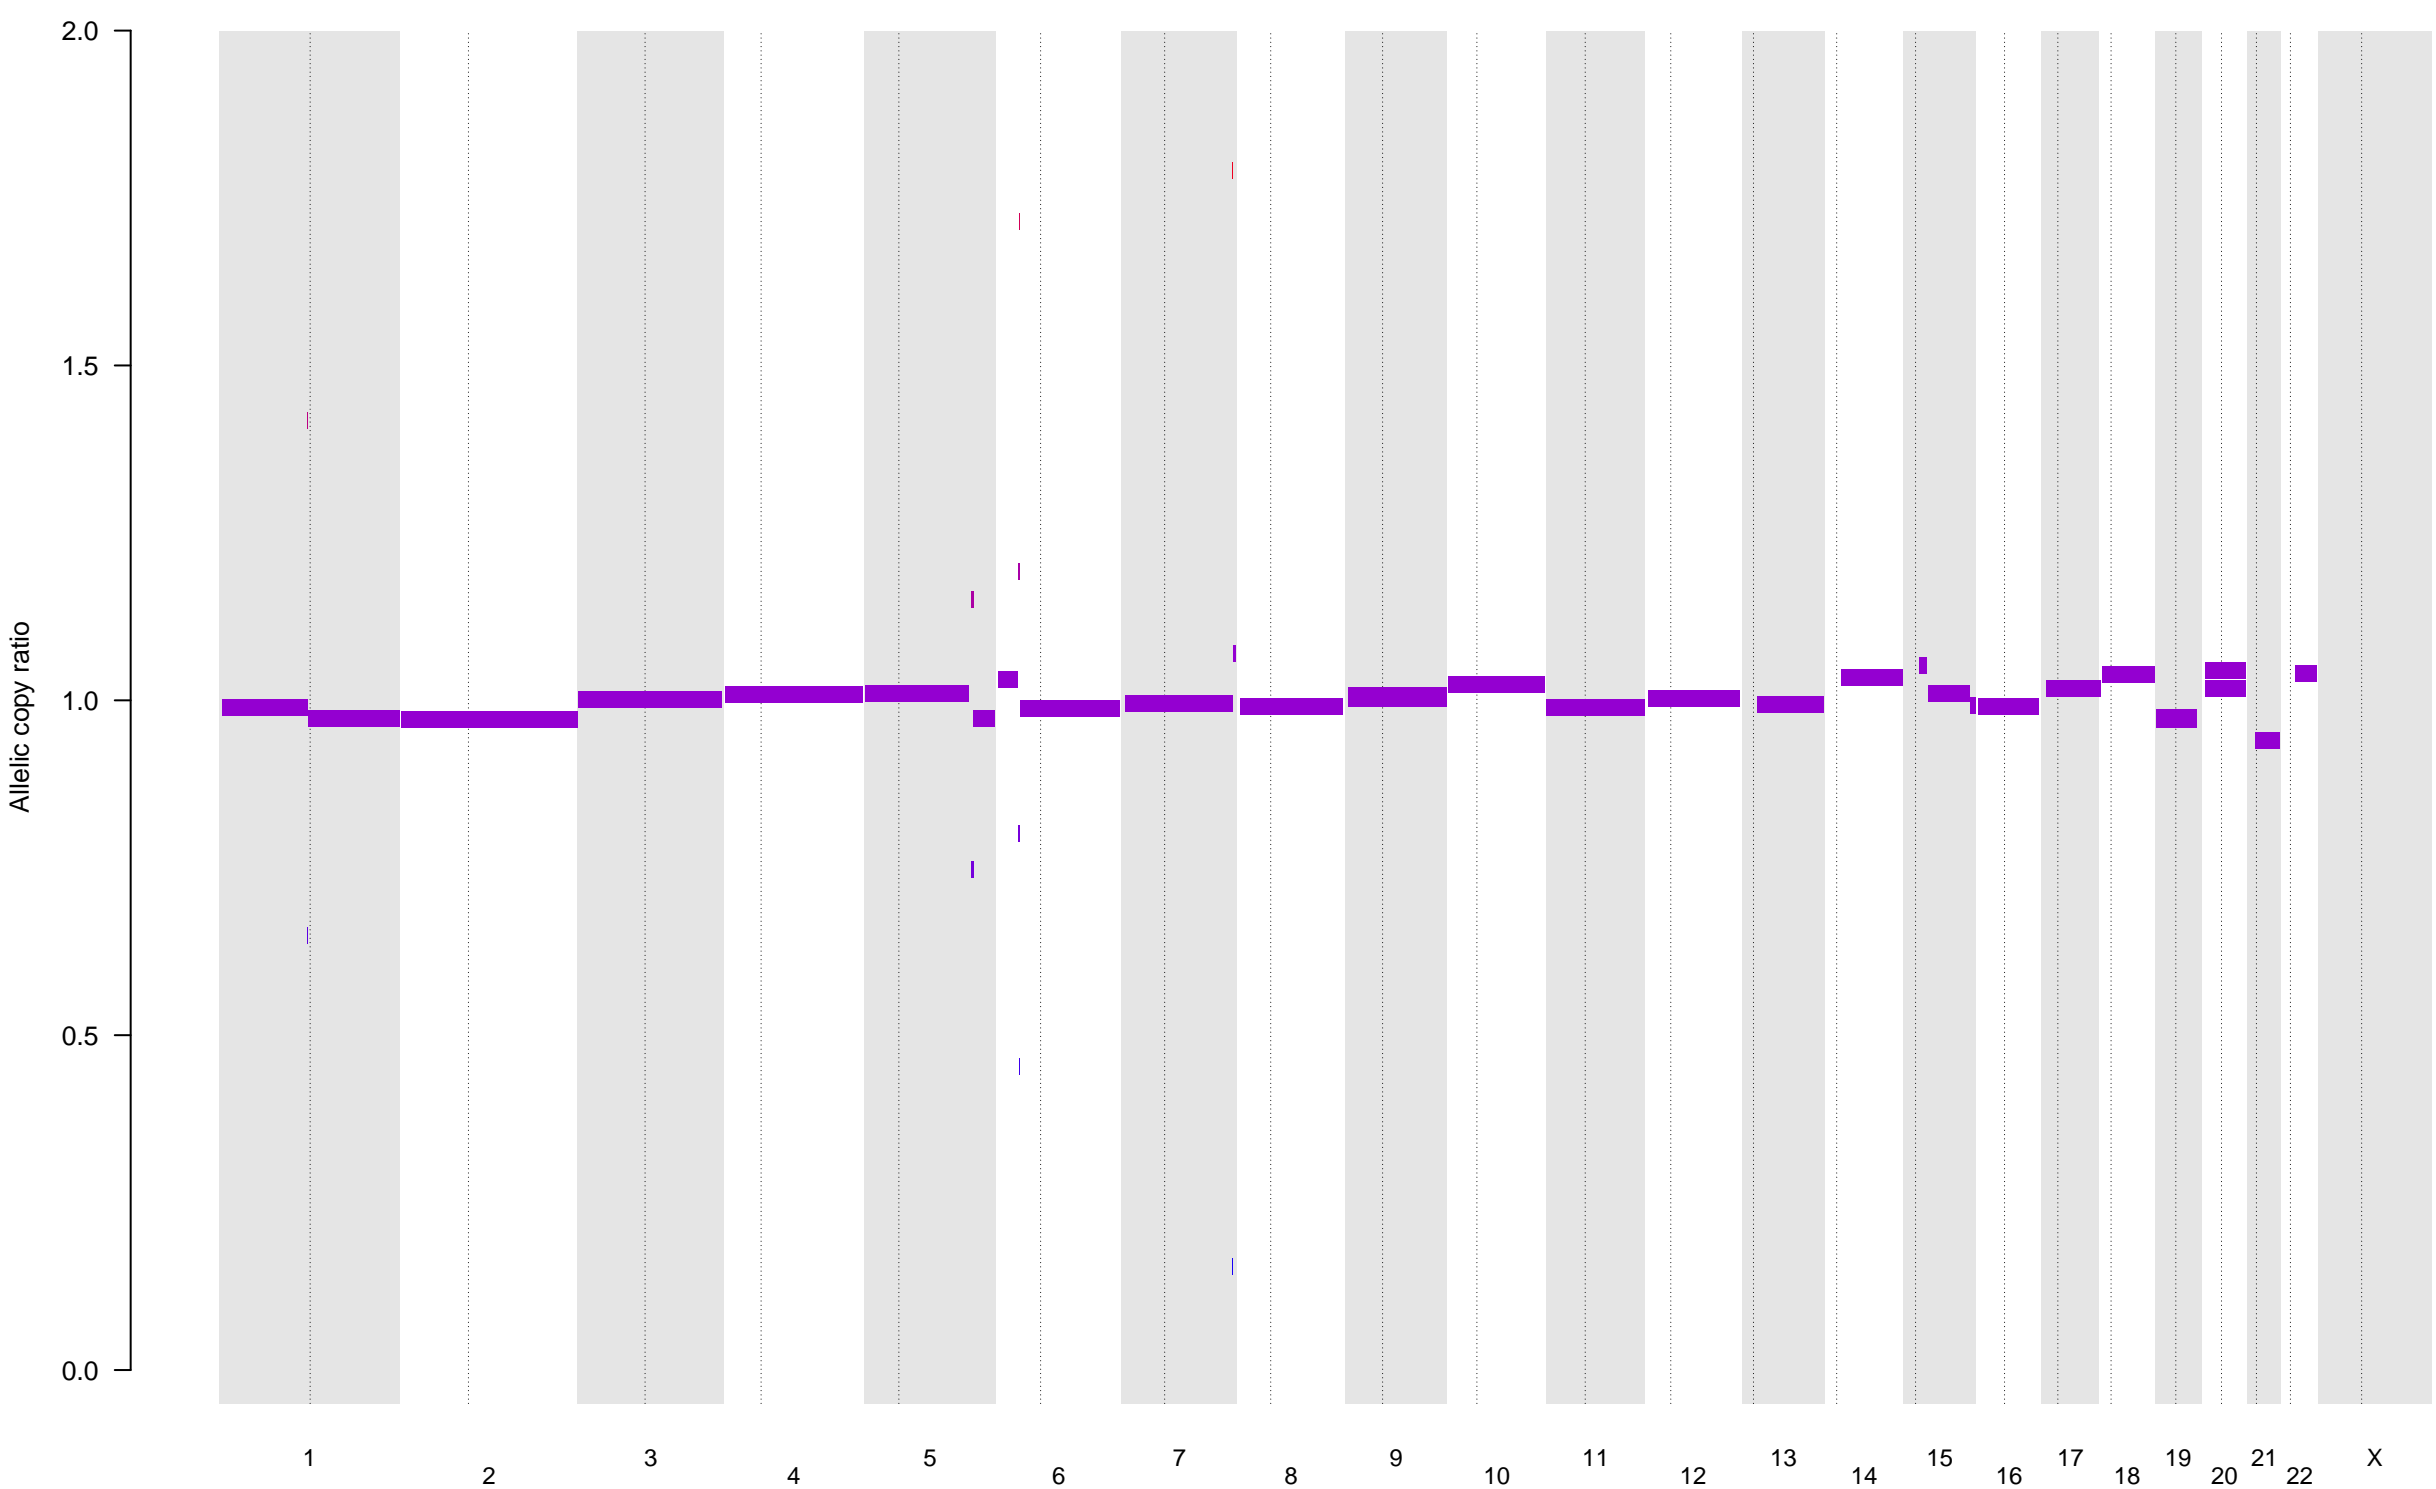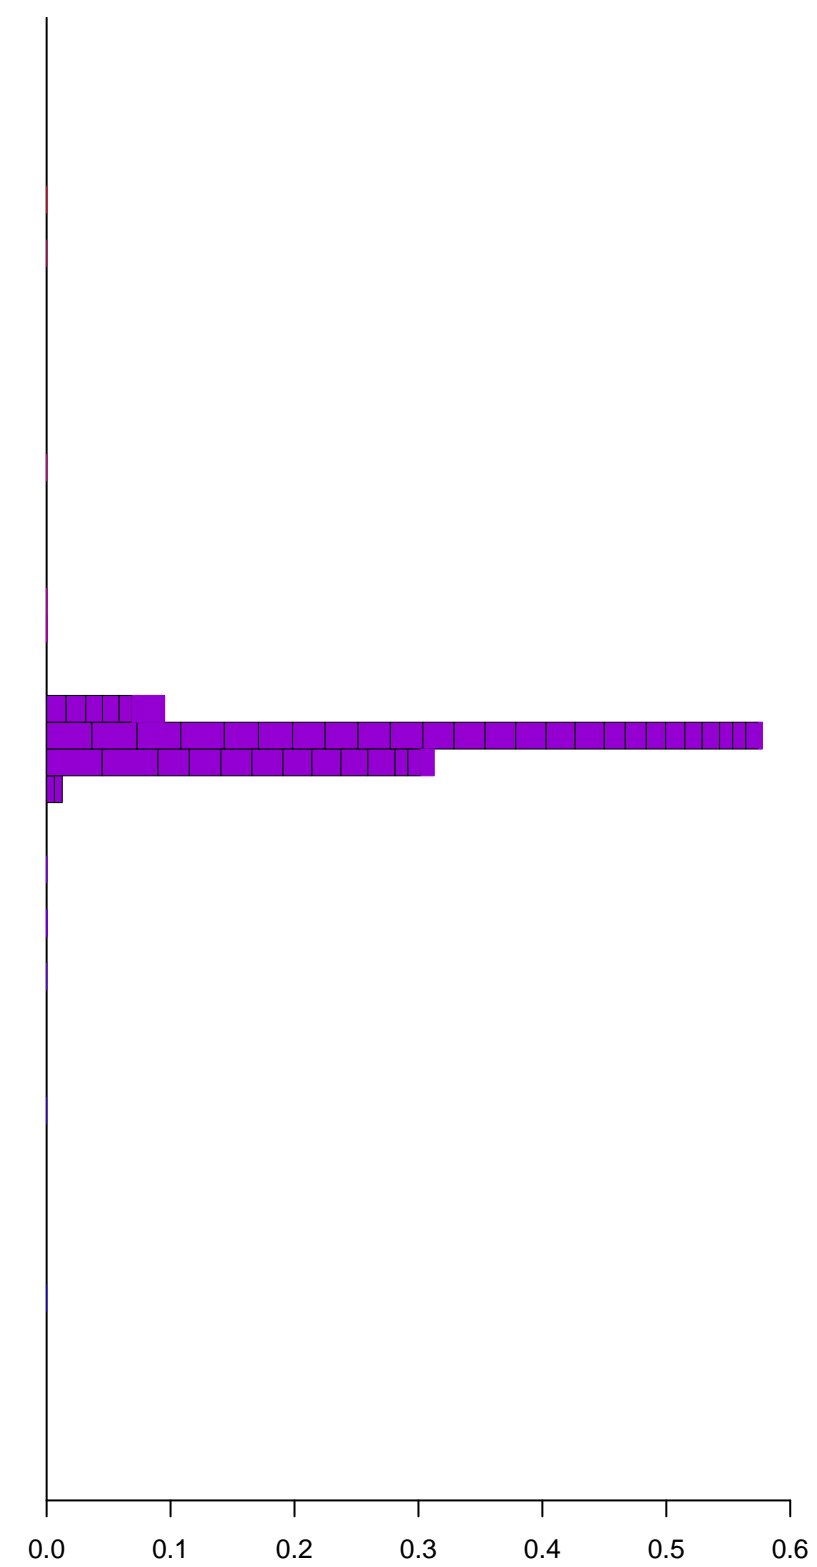

HGYJU7YV\_L\_153226

purity( $\hat{\alpha}$ ) = 0.16, ploidy:  $\hat{t} = 2.05$ ,  $\hat{t}_g = 2$   
 $\theta_z = 0.01$ ,  $\theta_a = 1.66$ , WGD=0  
SCNA LL = -241.9, SSNV LL = -9749.14, SCNA Ev = -29.60161

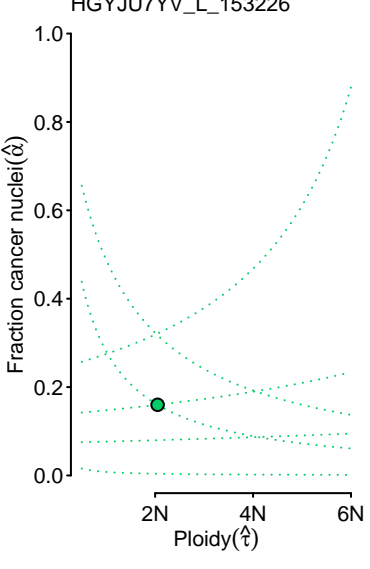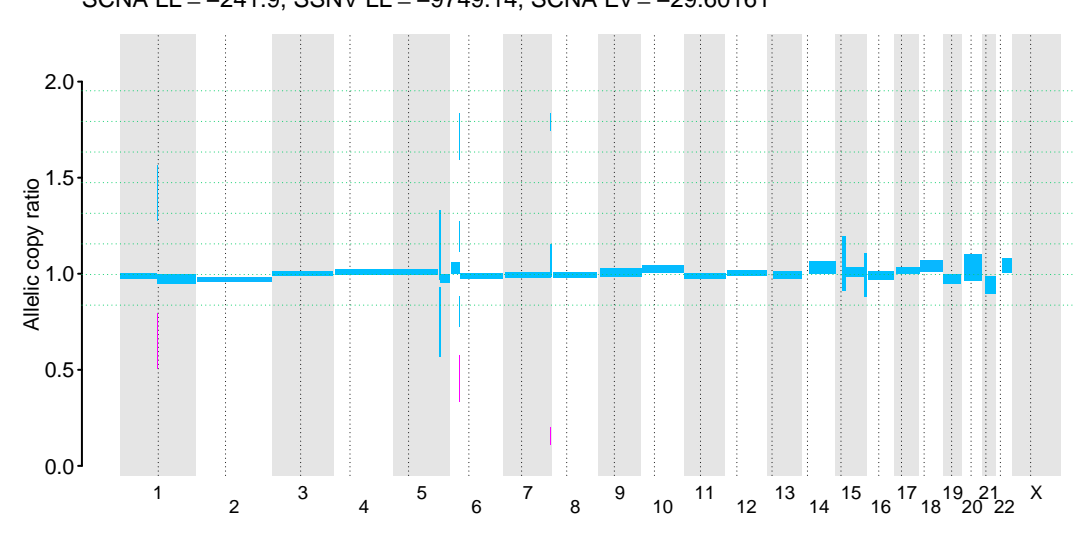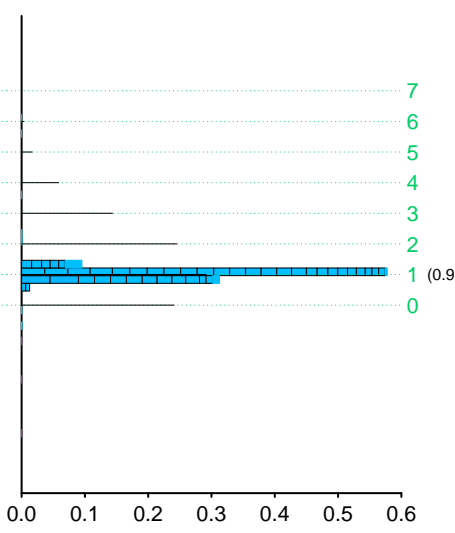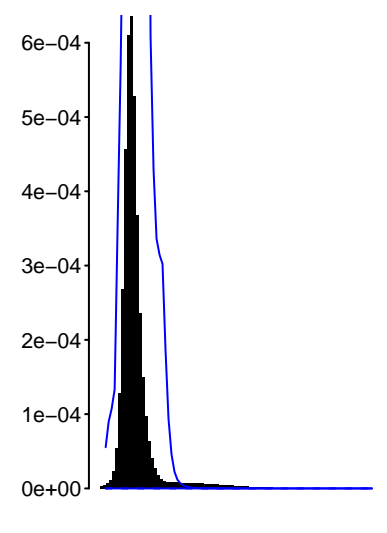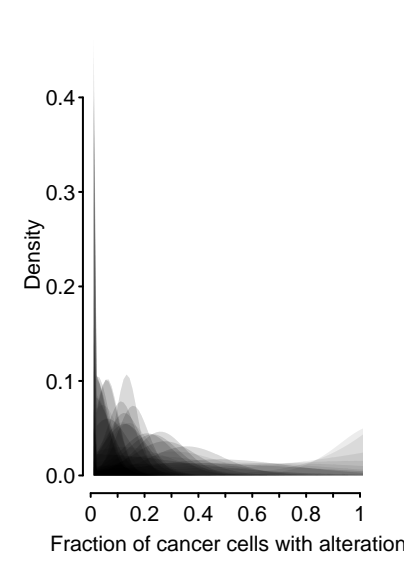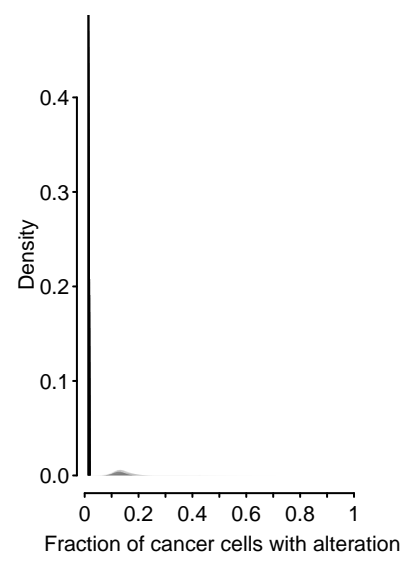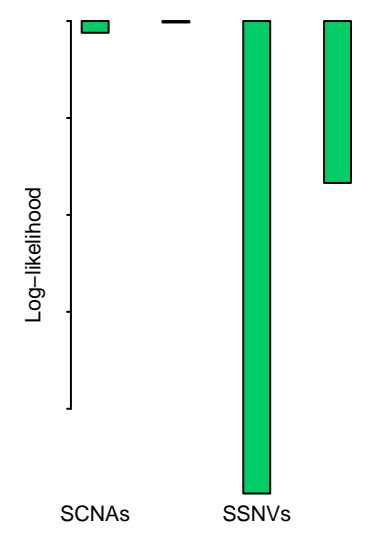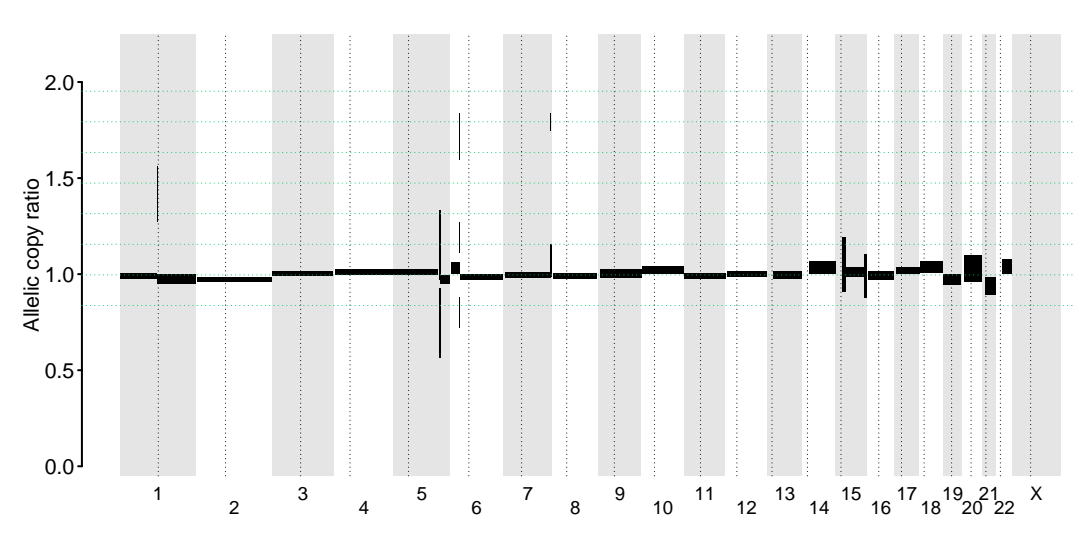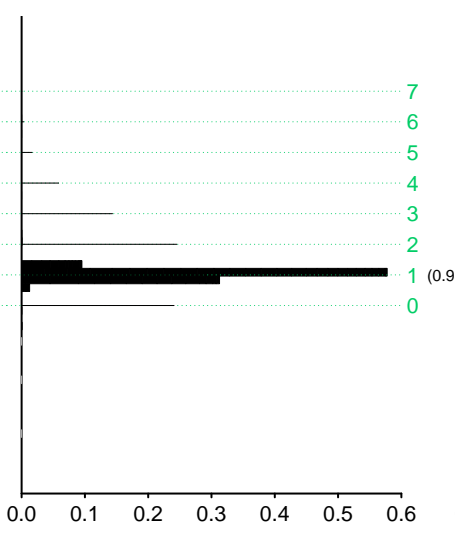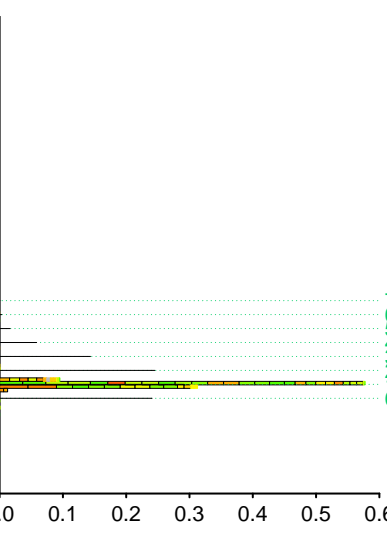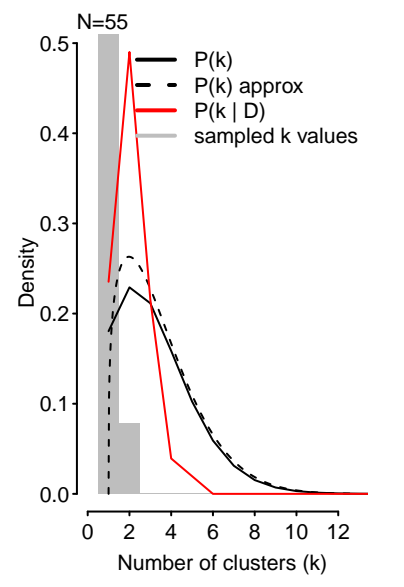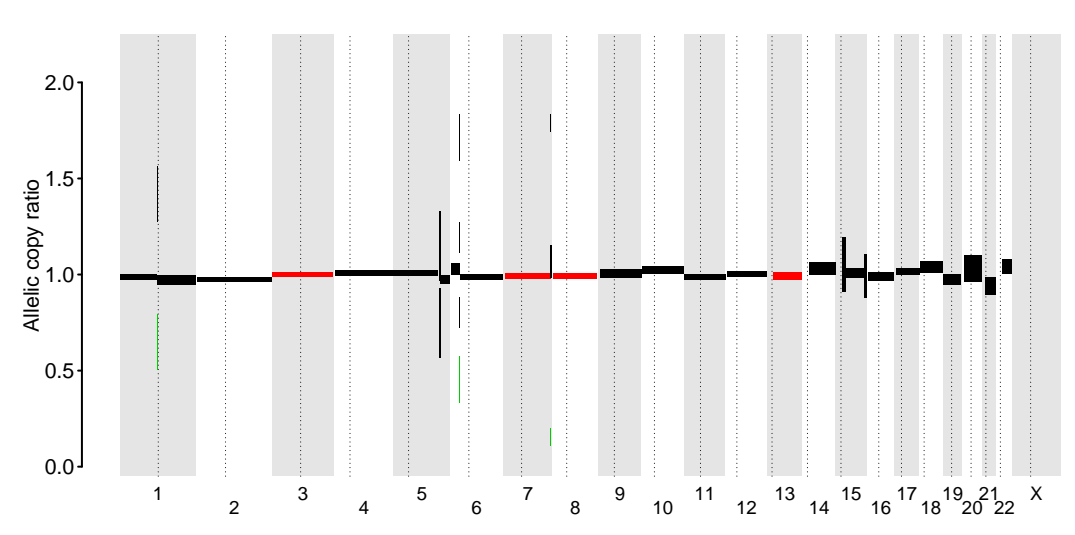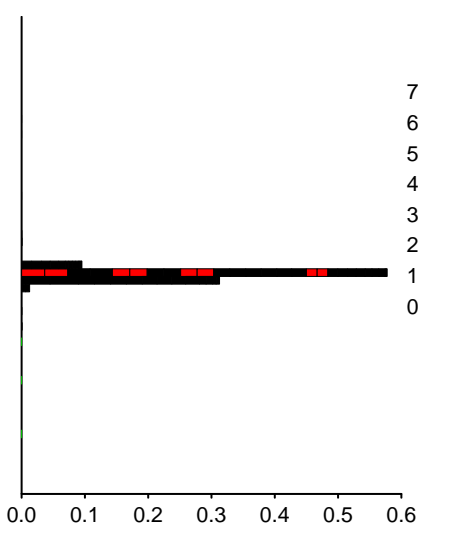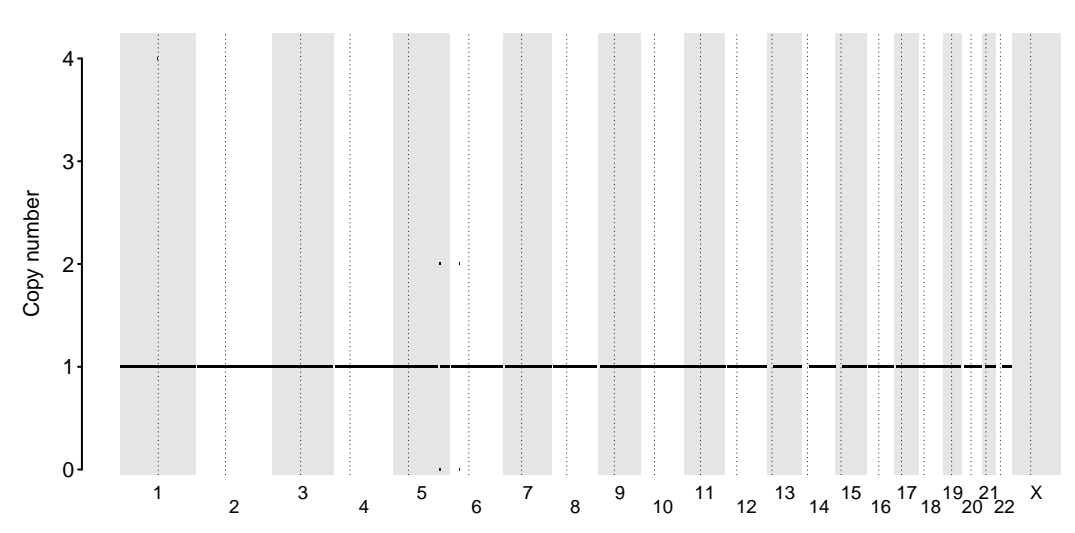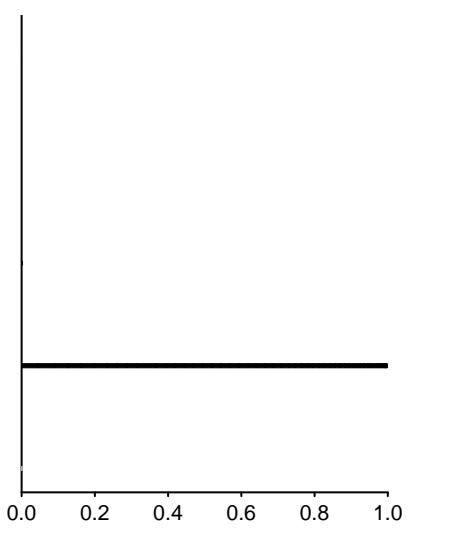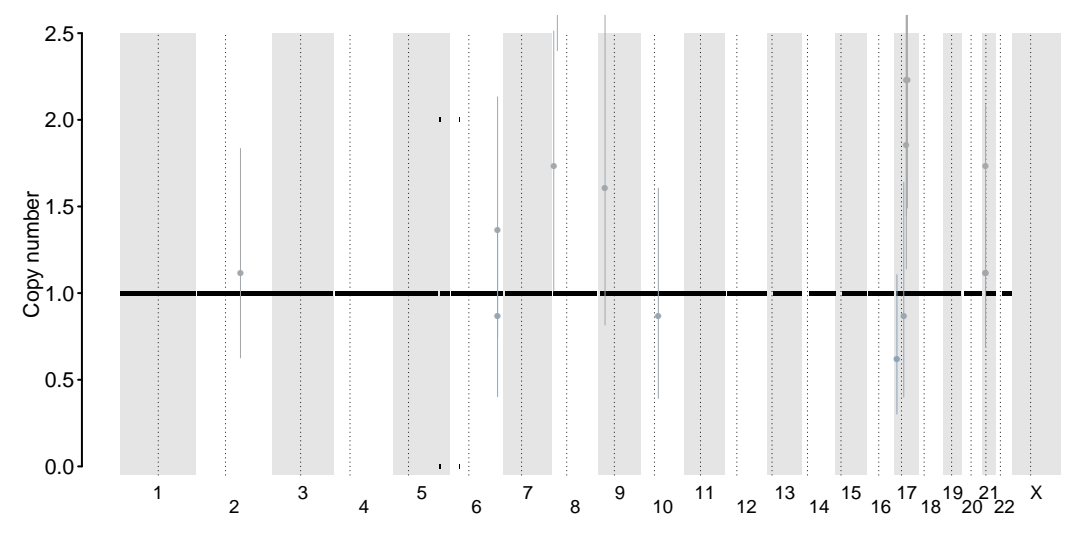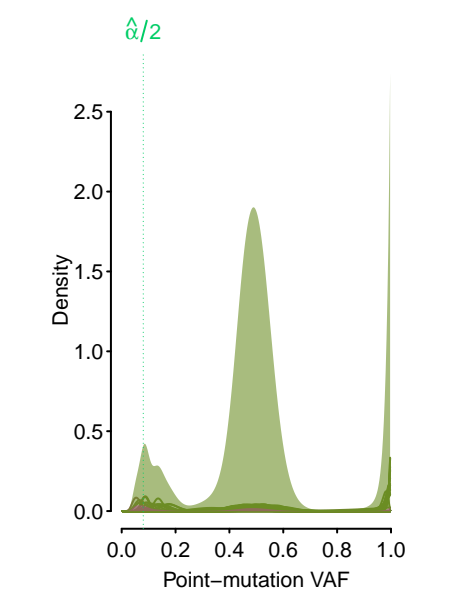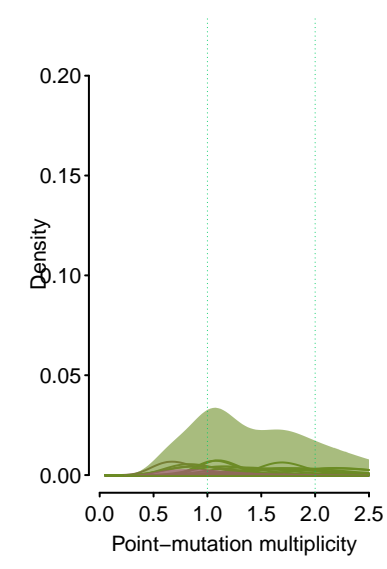

Sample 20

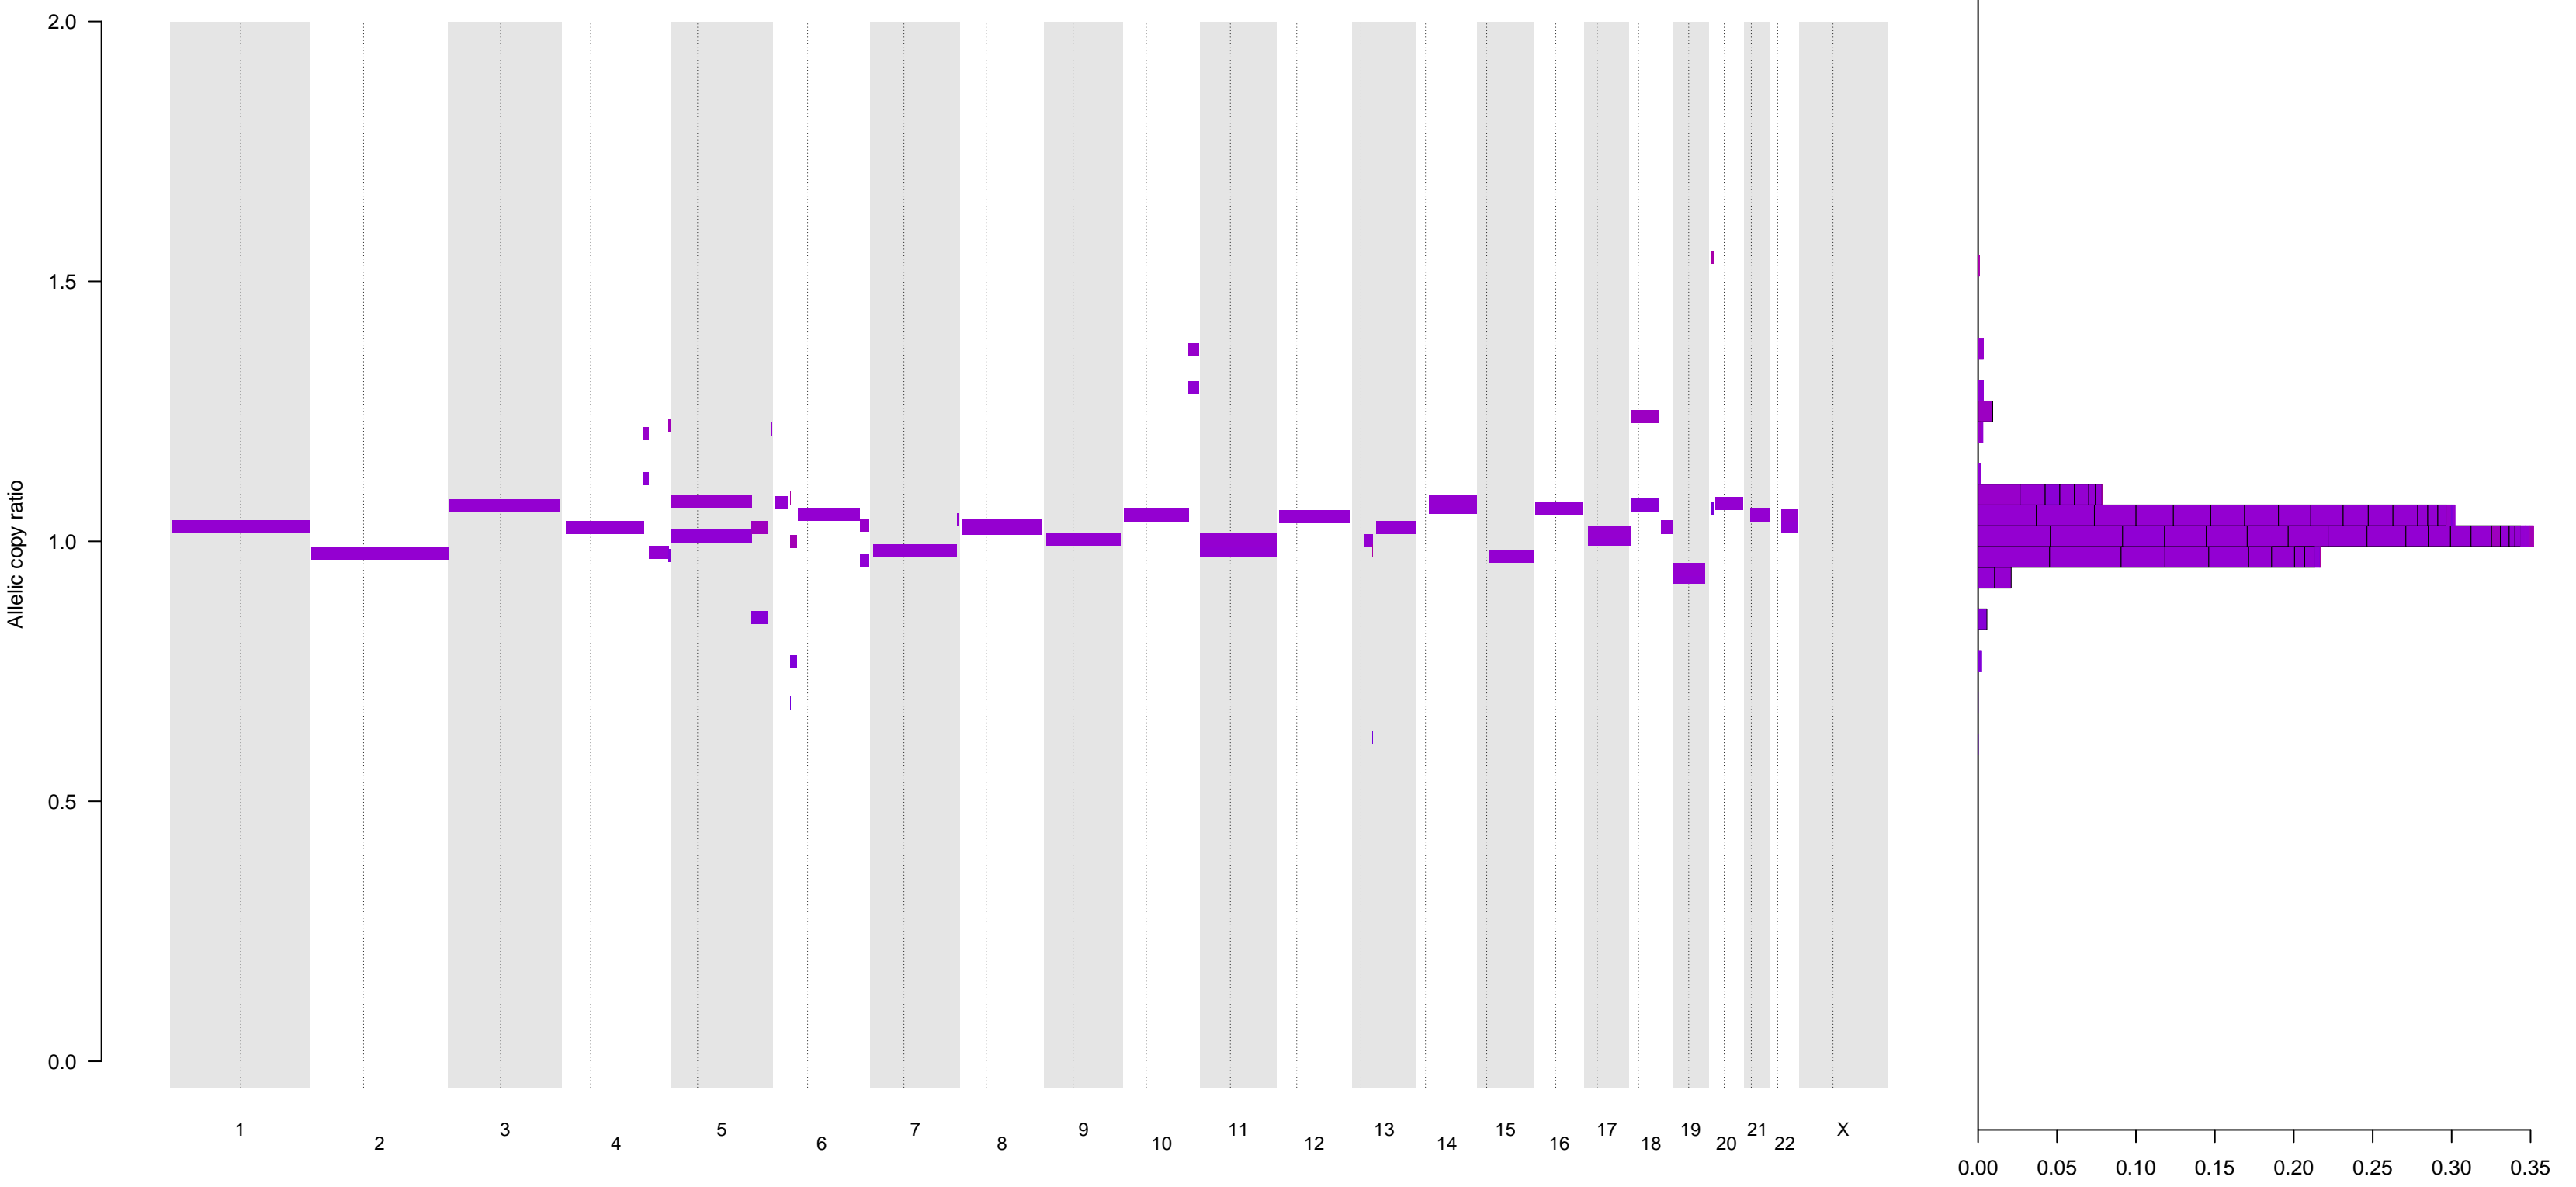



$\hat{\alpha} = 0.26$ , ploidy:  $\hat{\tau} = 1.91$ ,  $\hat{\tau}_g = 2.03$   
 $\theta_z = 0.21$ ,  $\theta_a = 1.309$ , WGD=0  
 SCNA LL = -300.51, SSNV LL = -7999.06, SCNA Ev = -81.06288

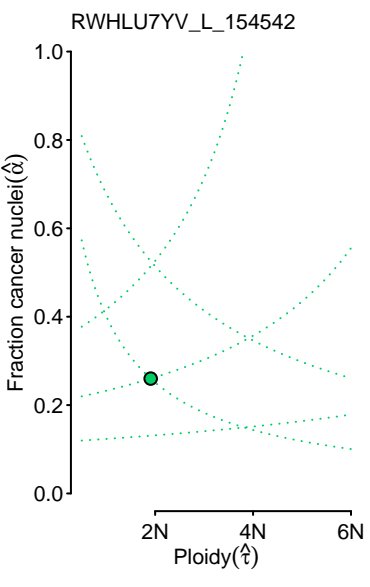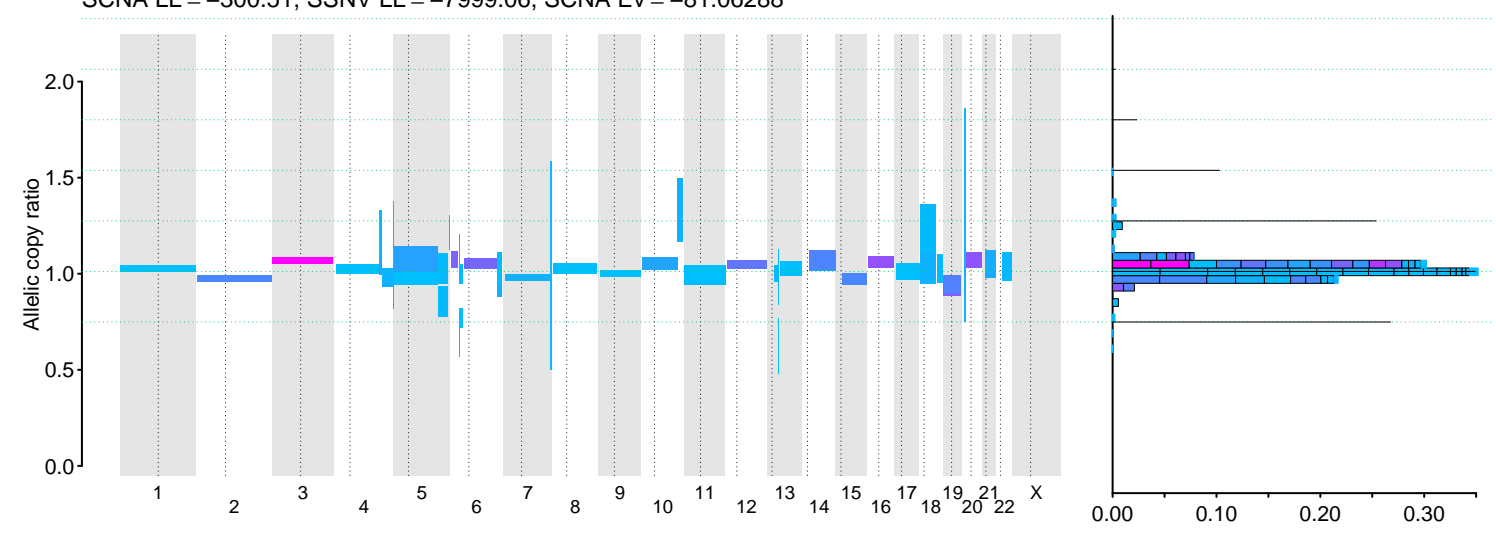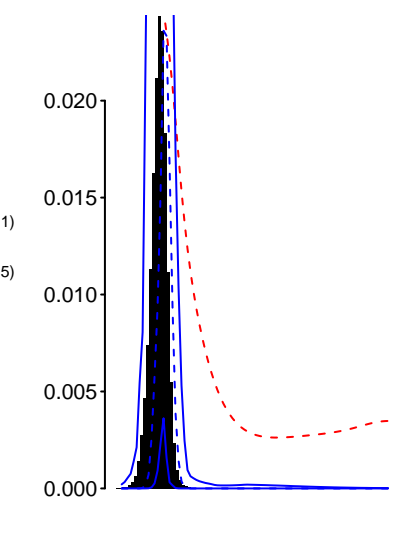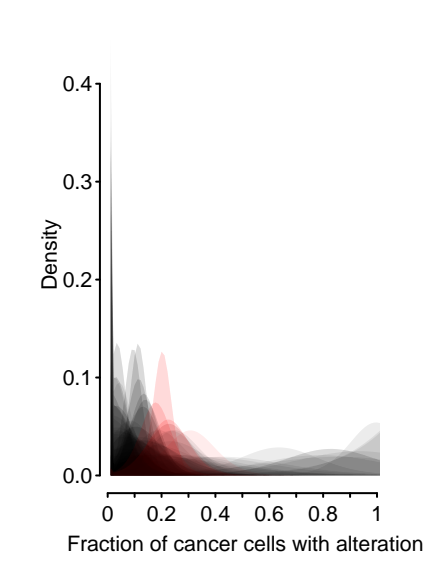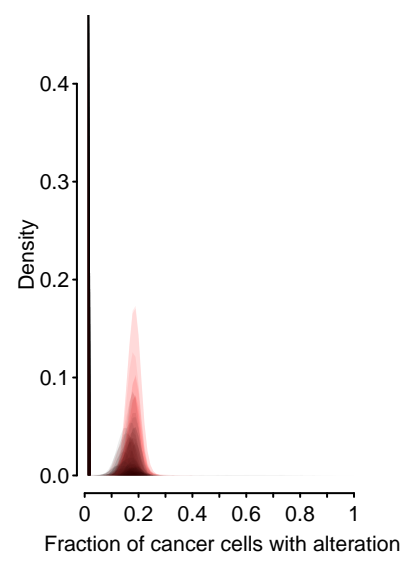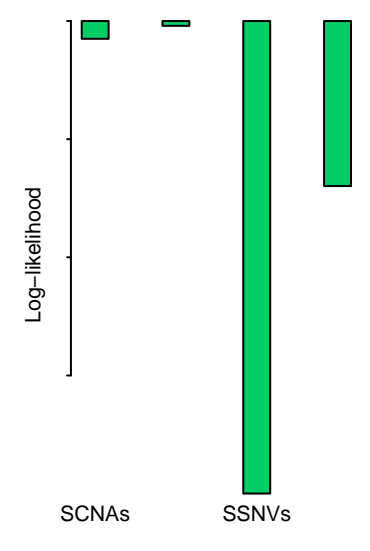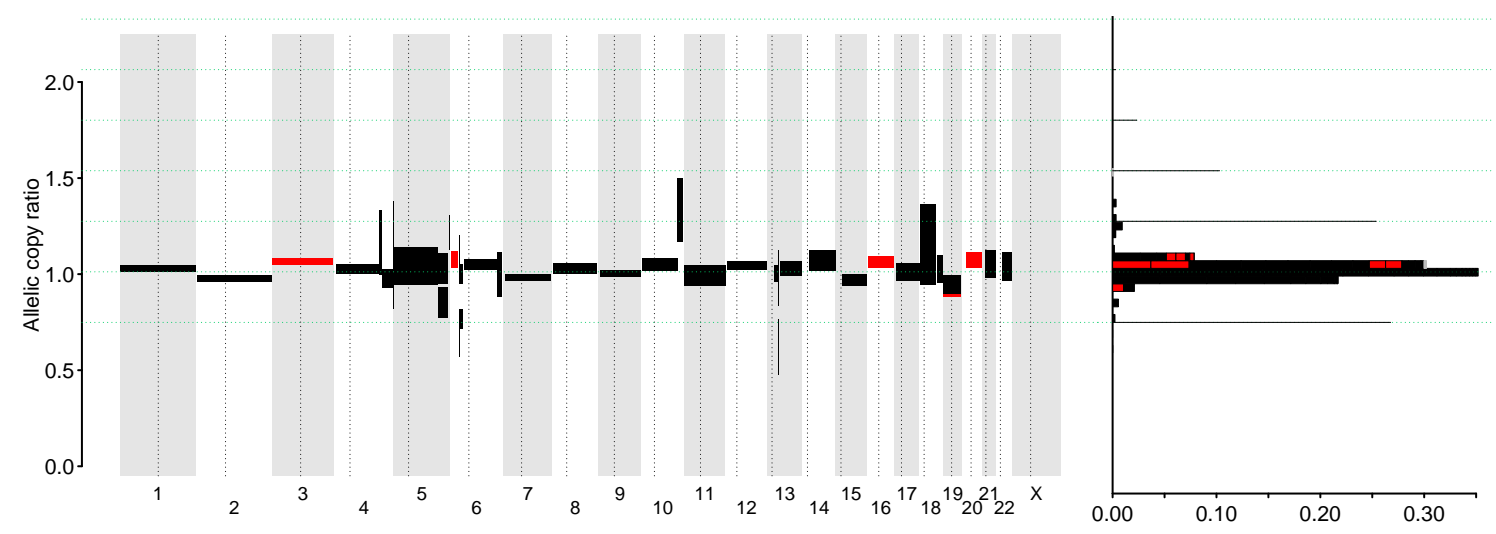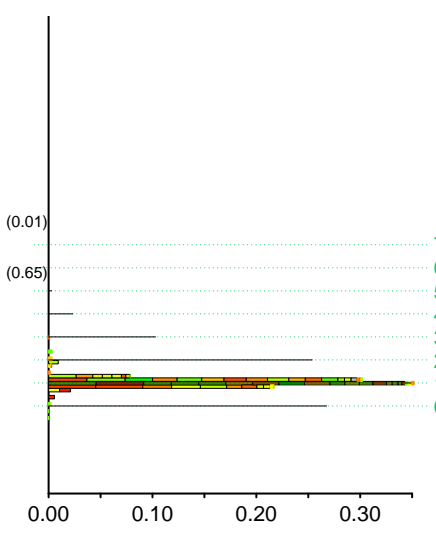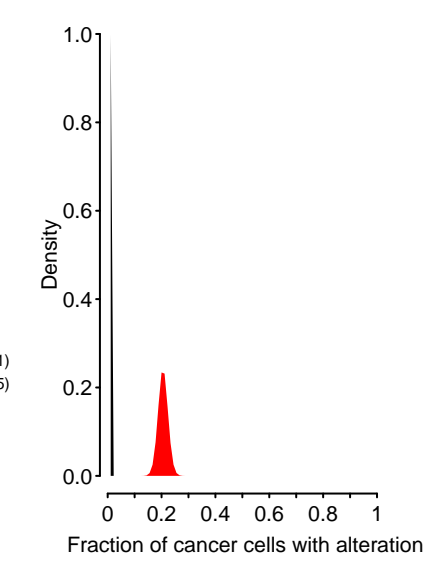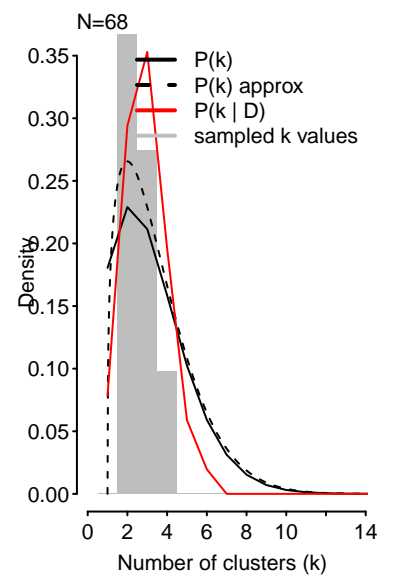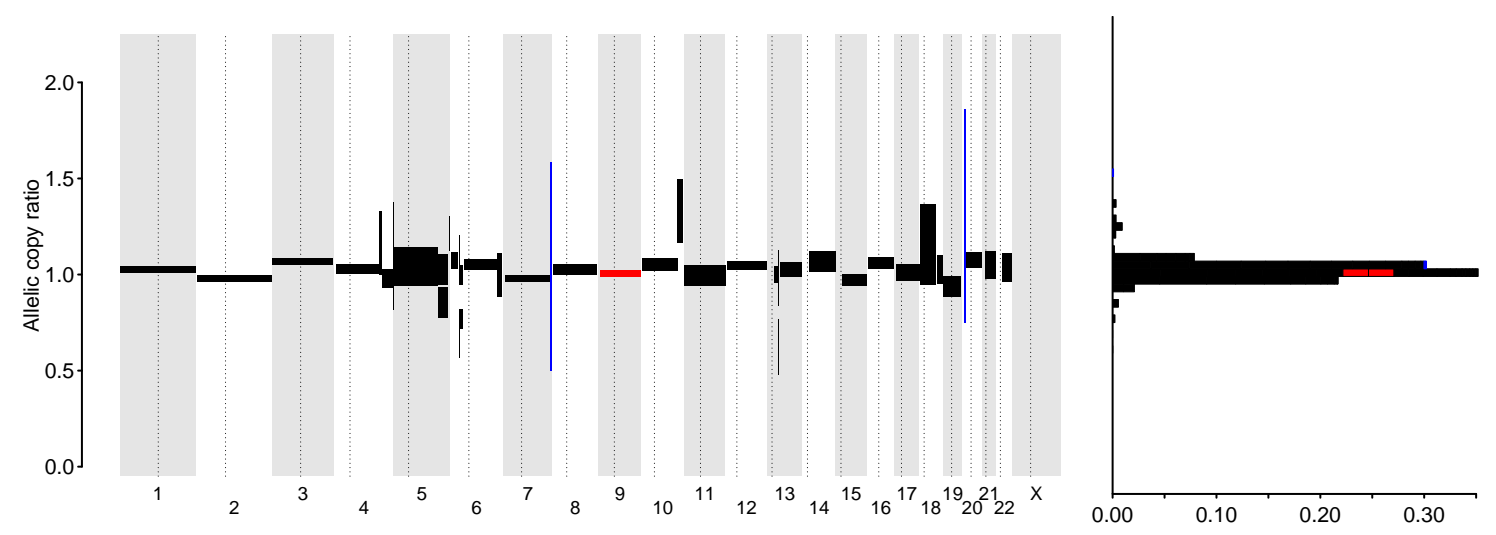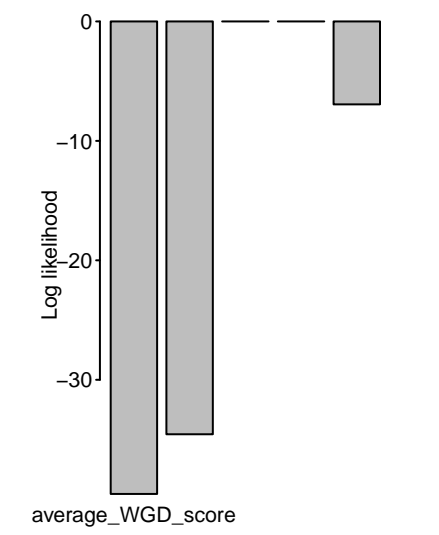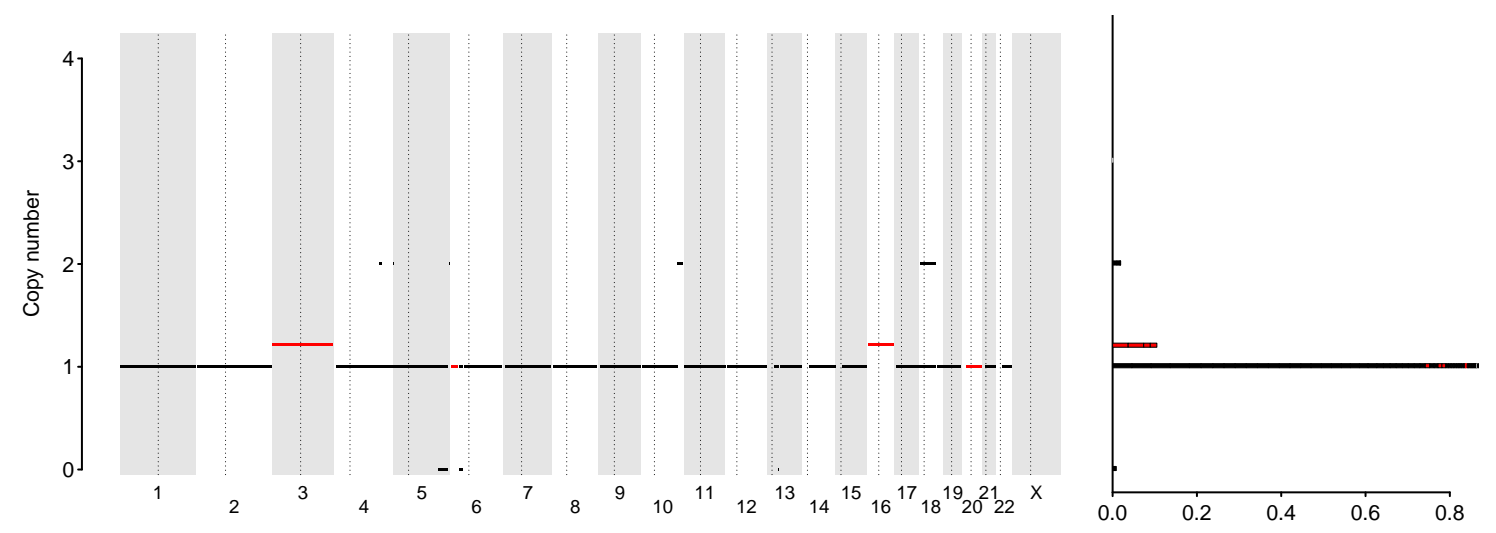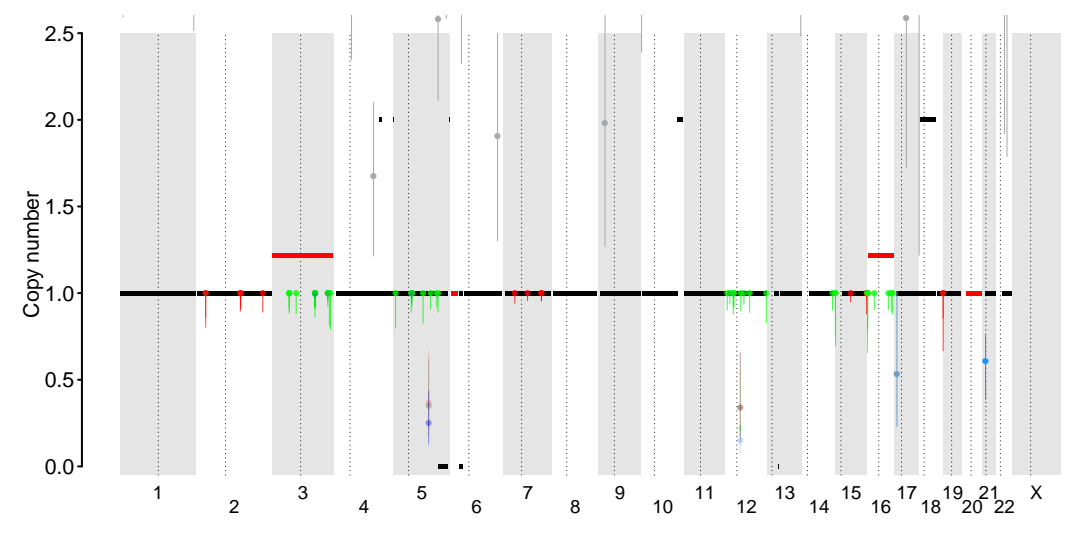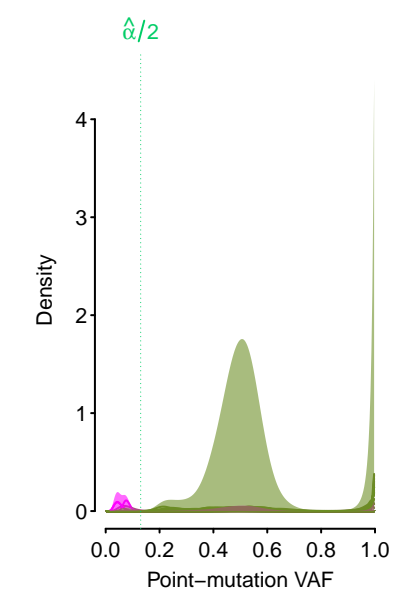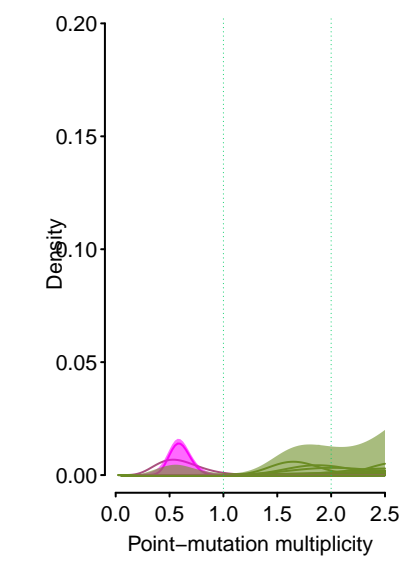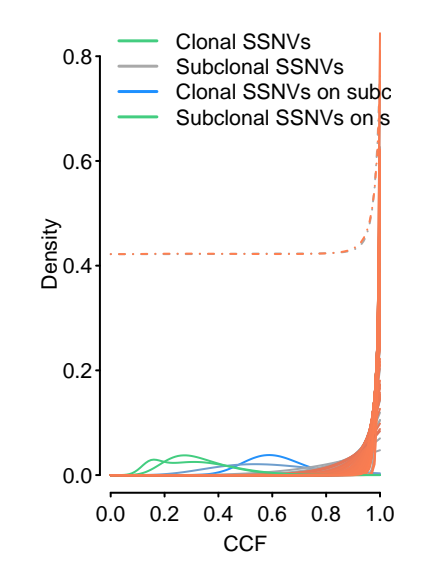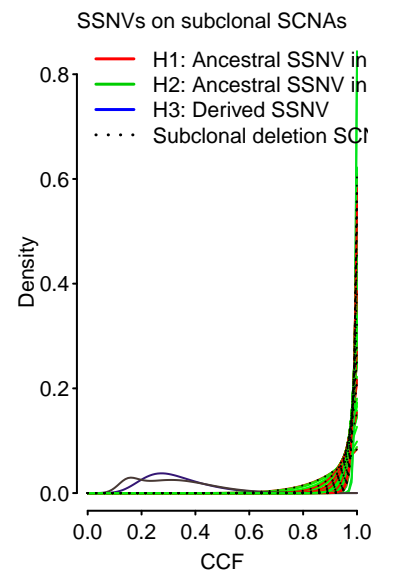



Sample 21

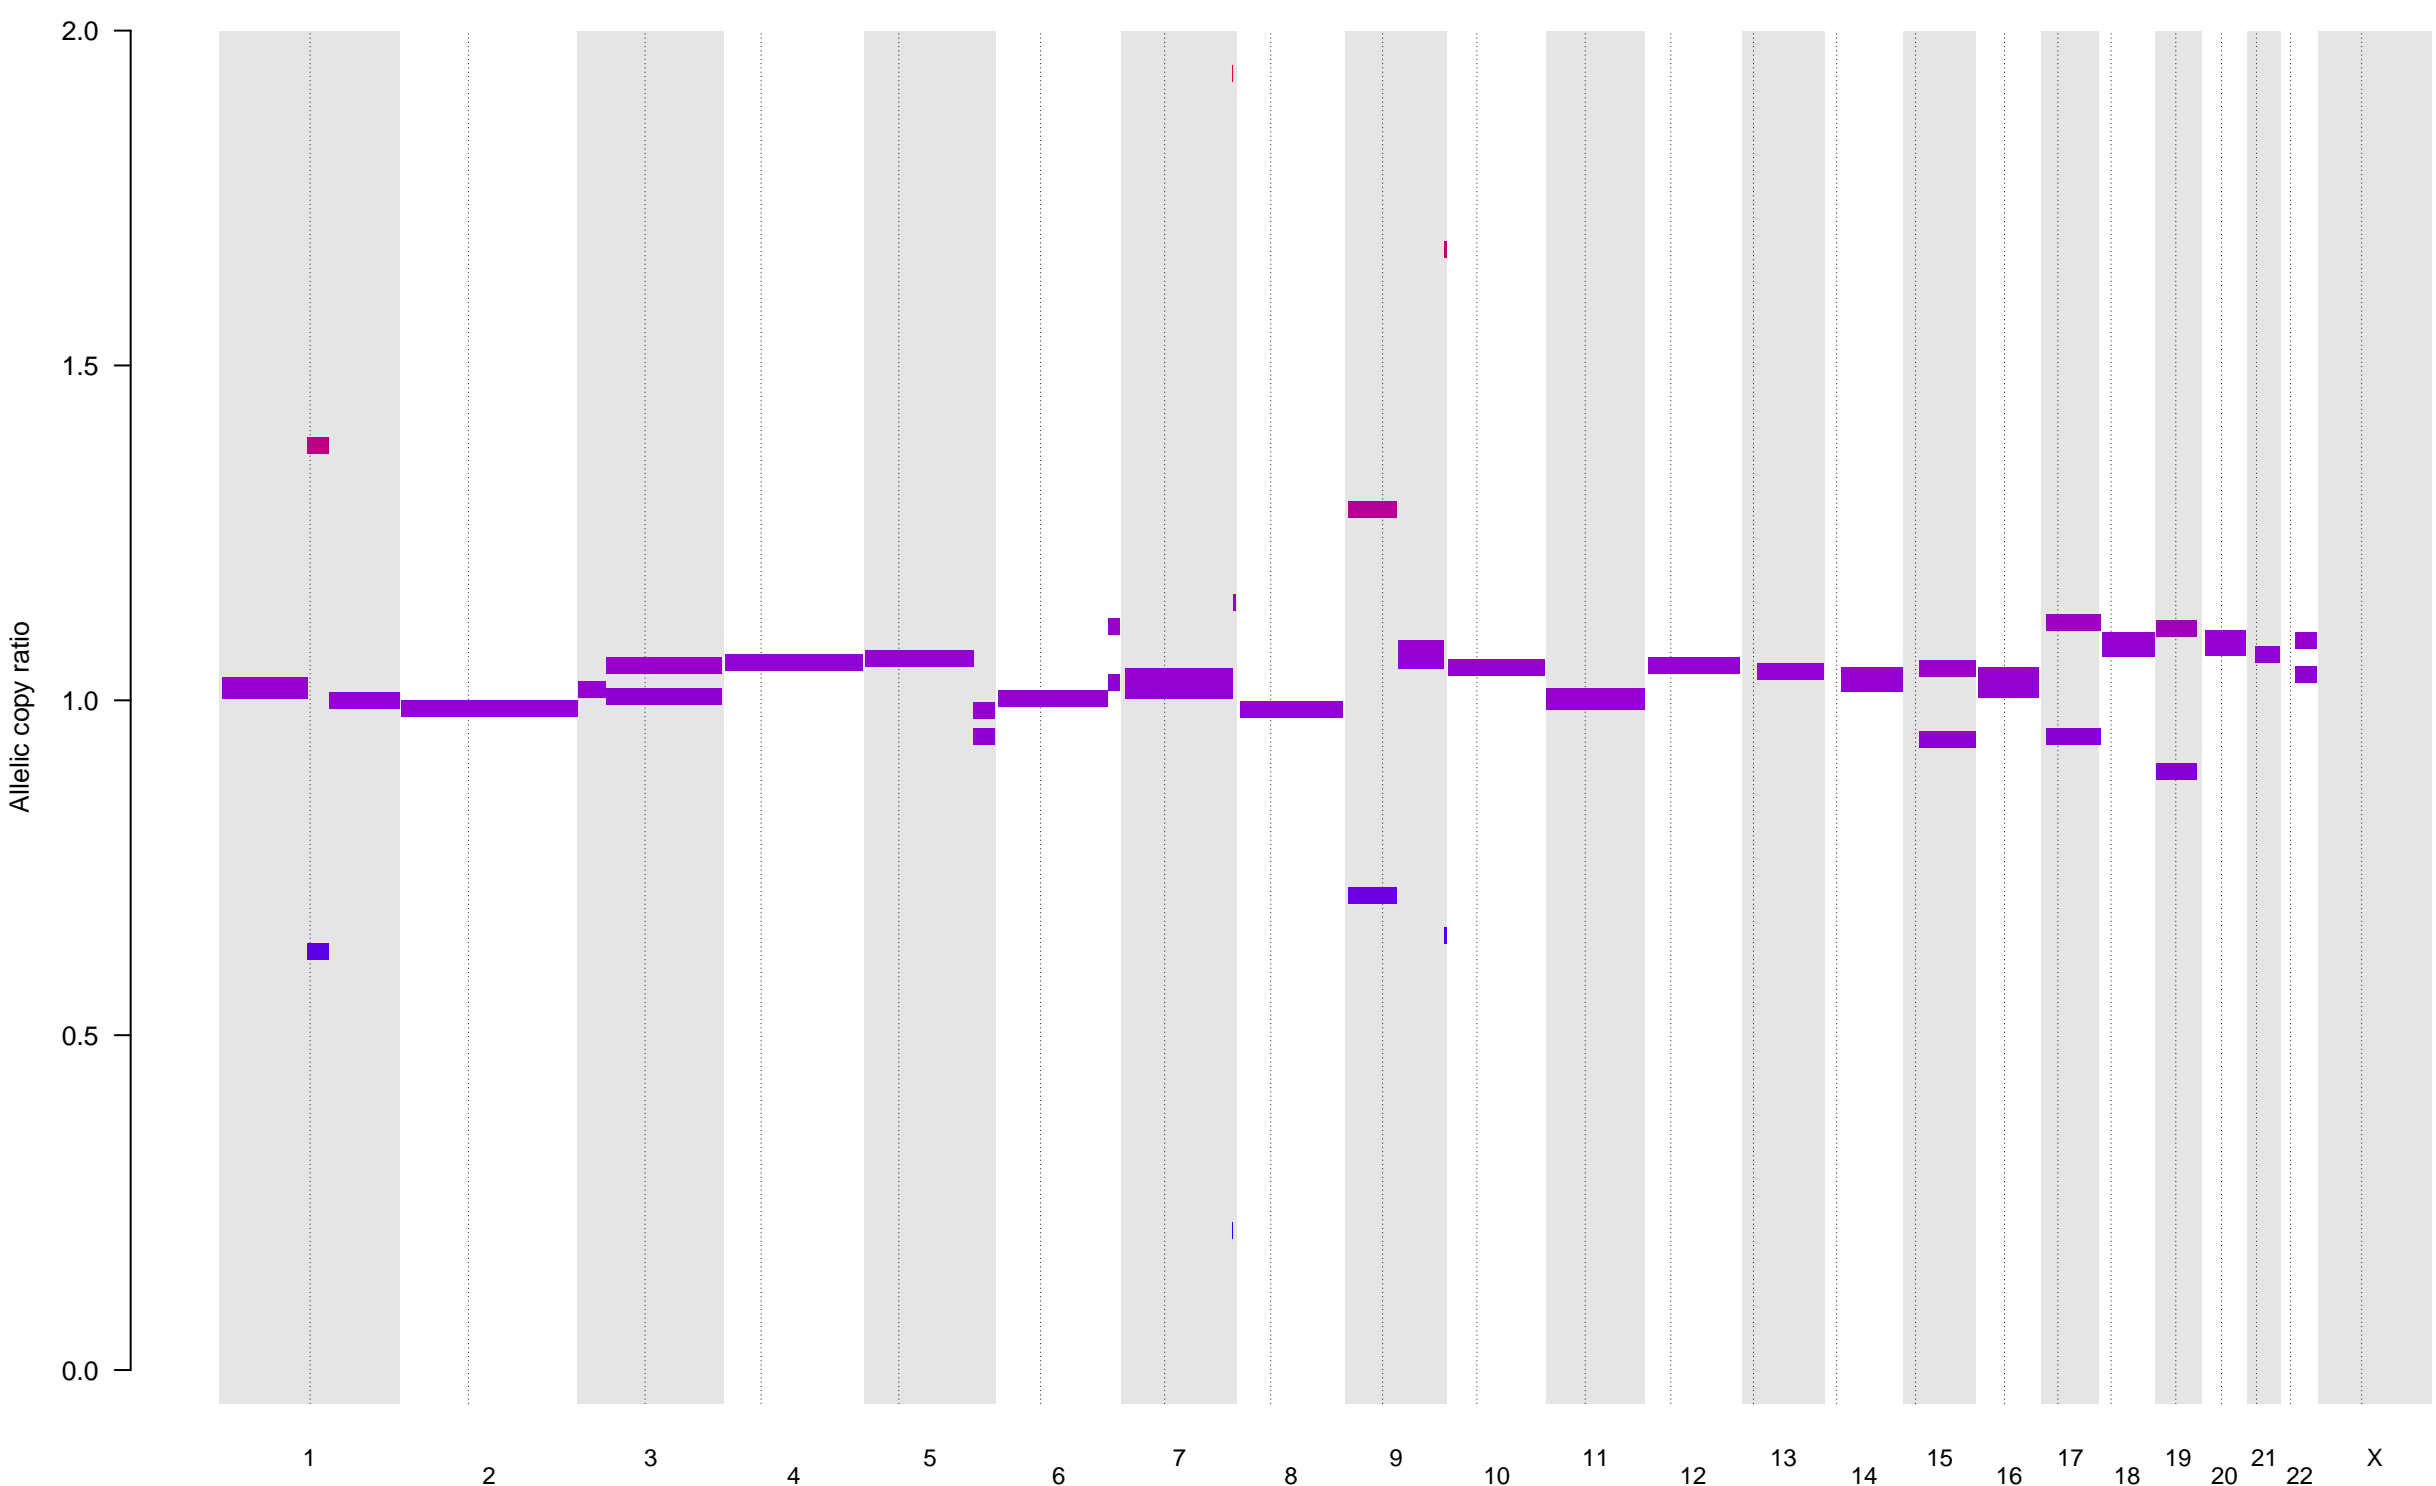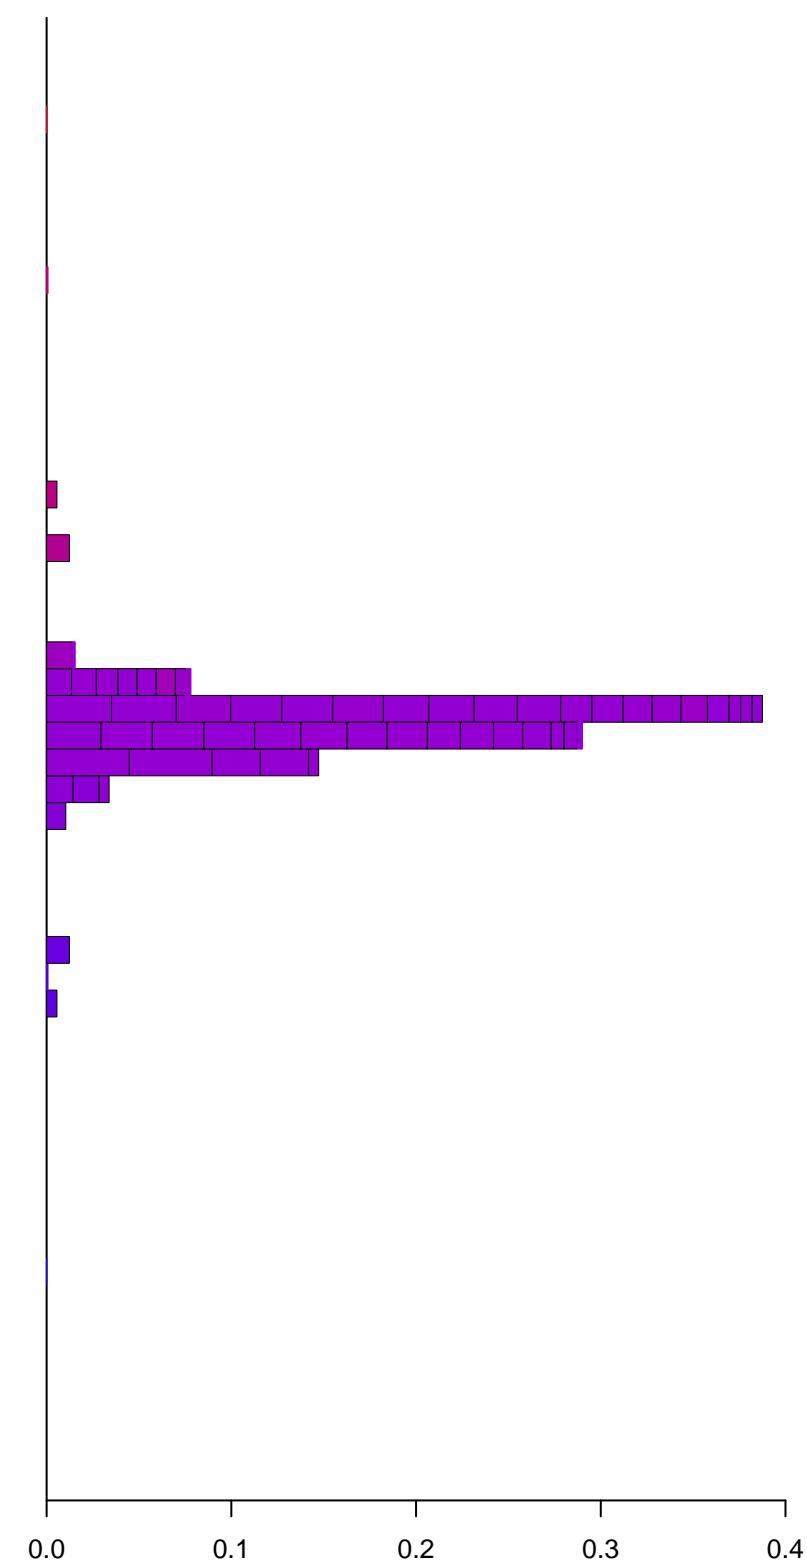

$\hat{\alpha} = 0.27$ , ploidy:  $\hat{\tau} = 1.79$ ,  $\hat{\tau}_g = 2$   
 $\theta_z = 0.05$ ,  $\theta_Q = 1.456$ , WGD=0  
 SCNA LL = -241.51, SSNV LL = -5910.57, SCNA Ev = -33.49066

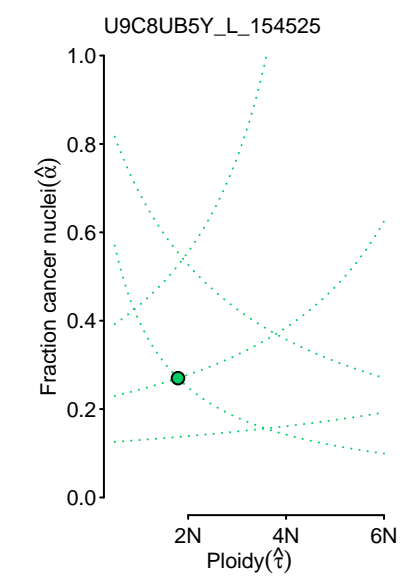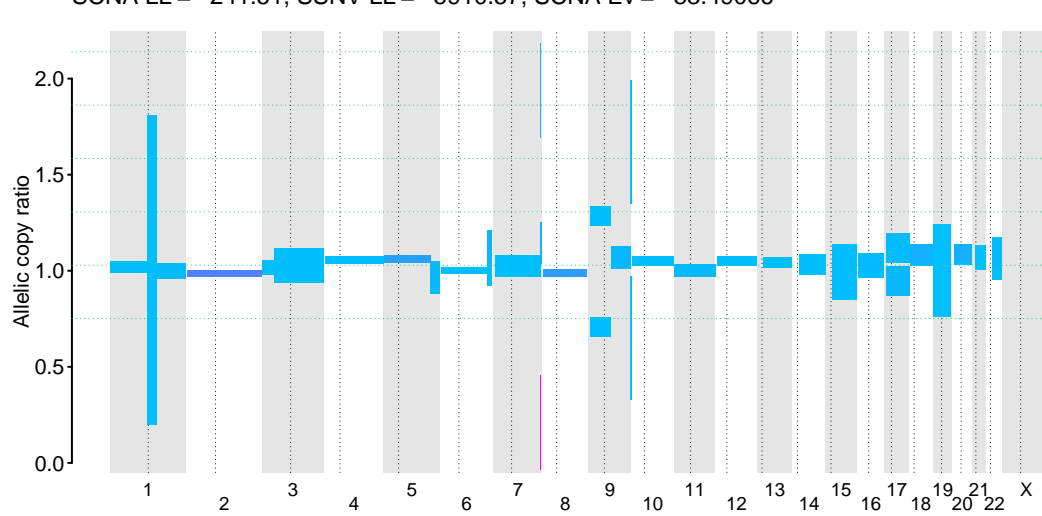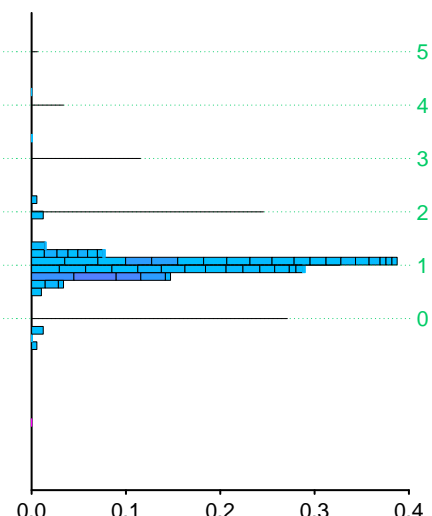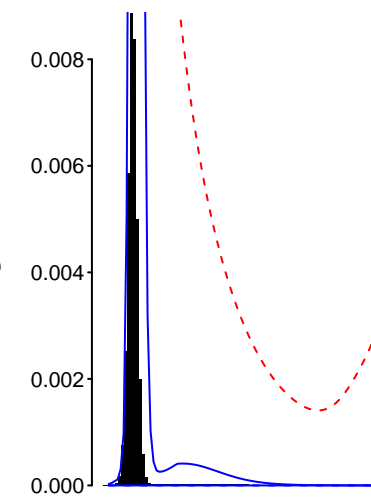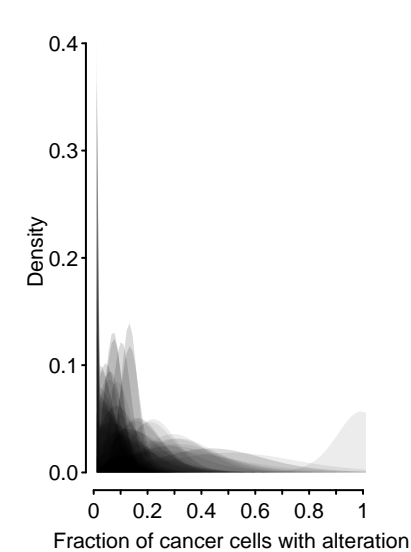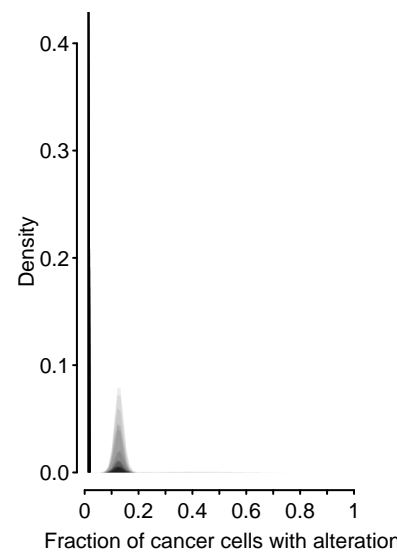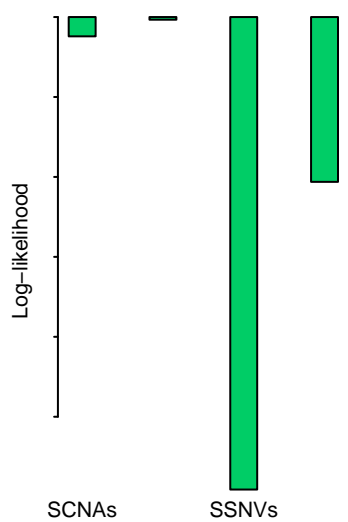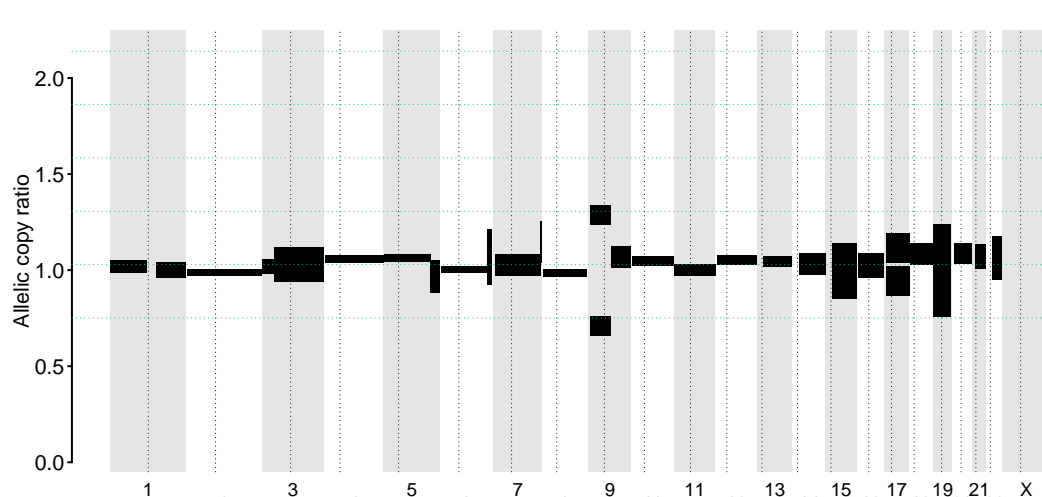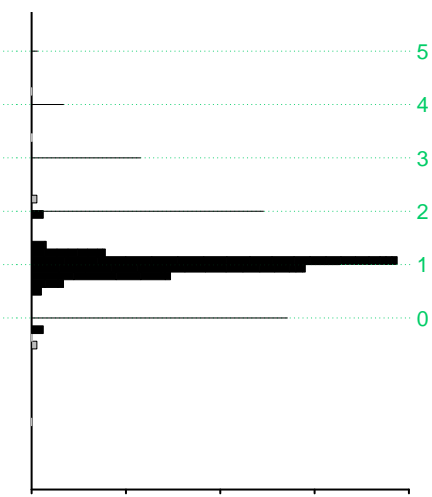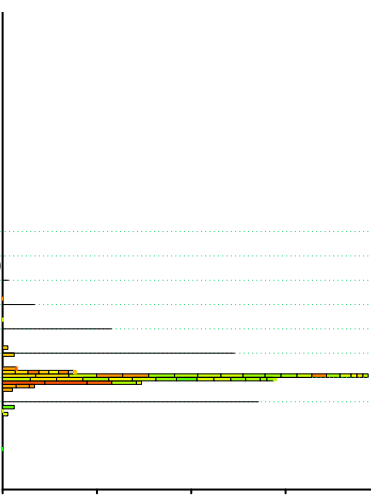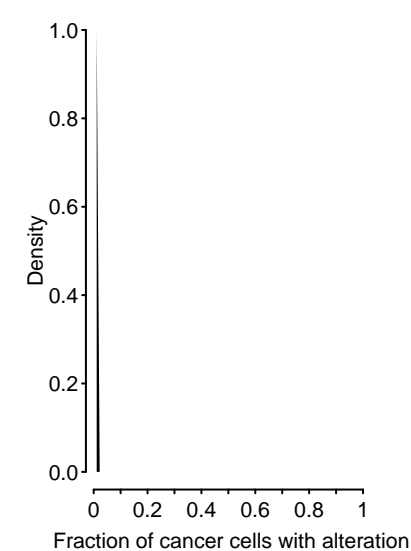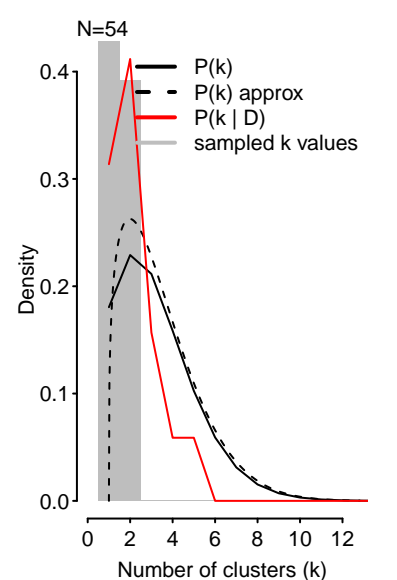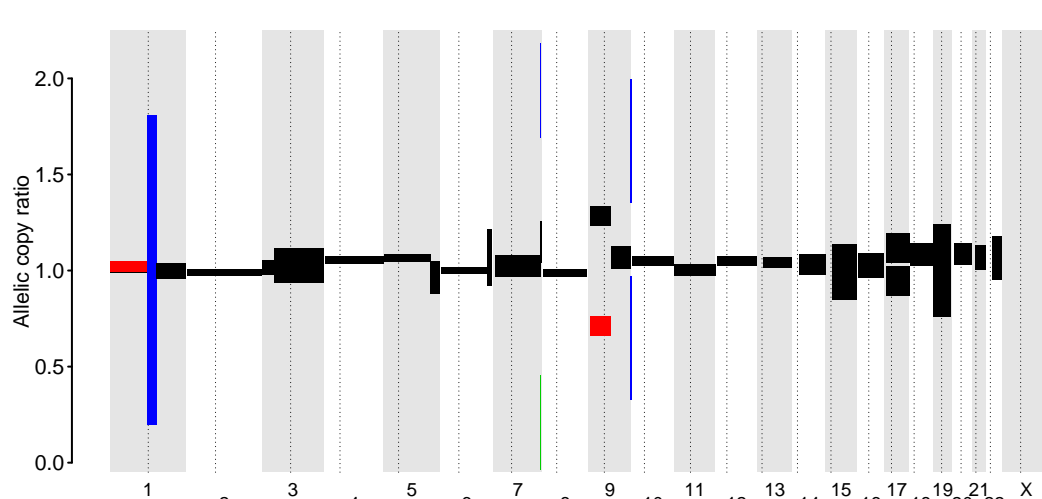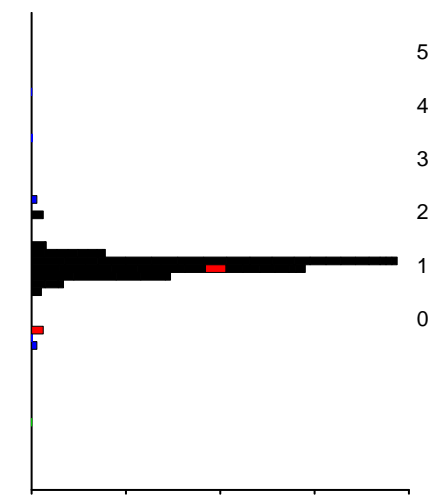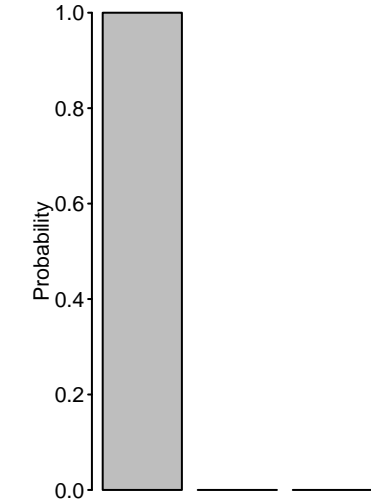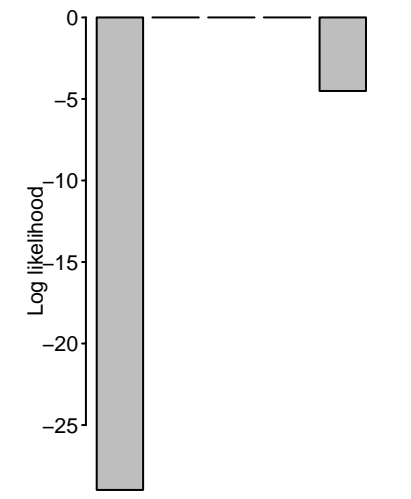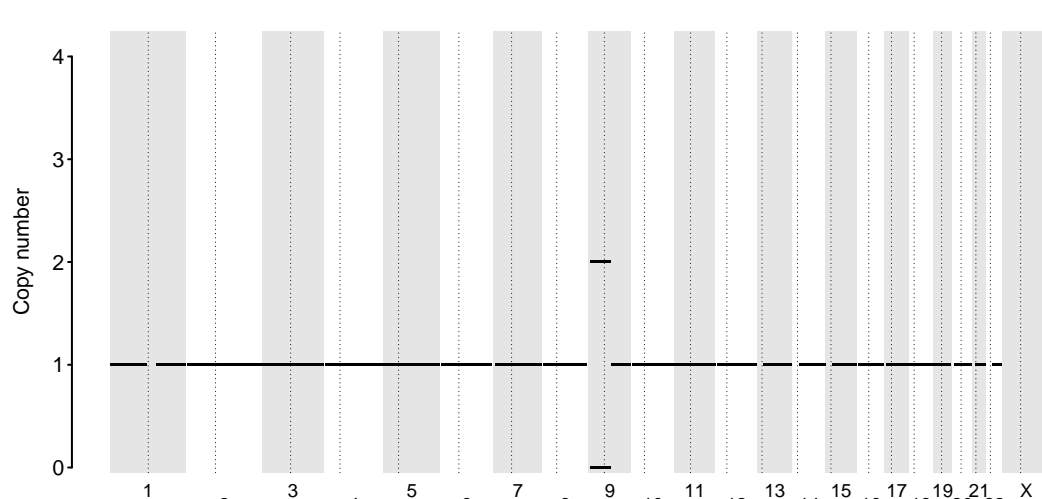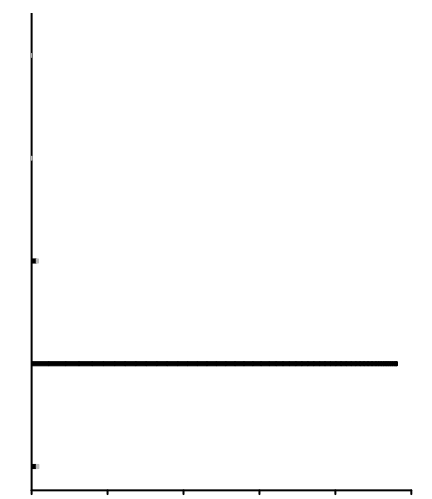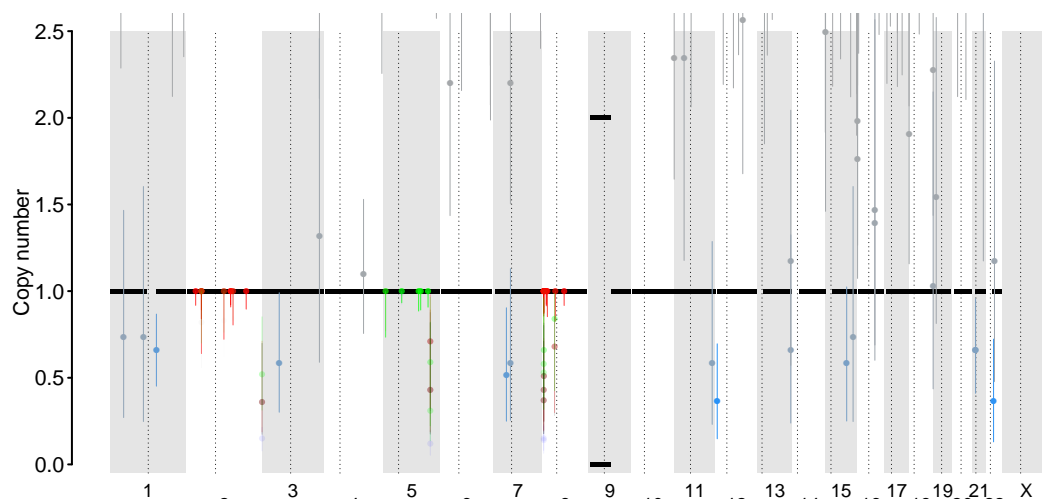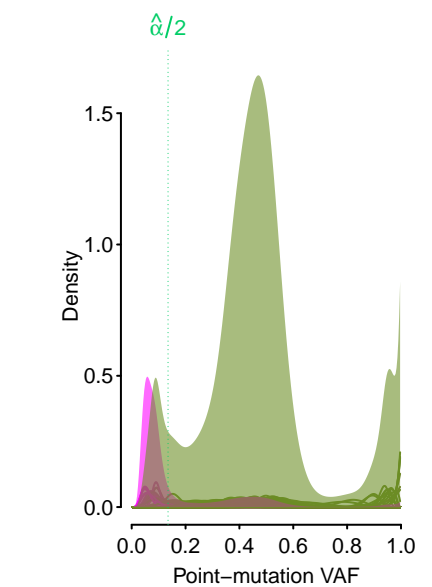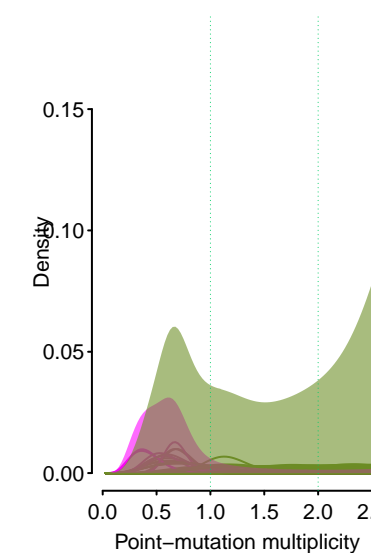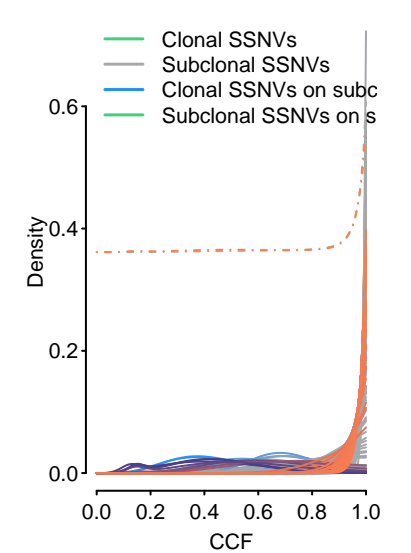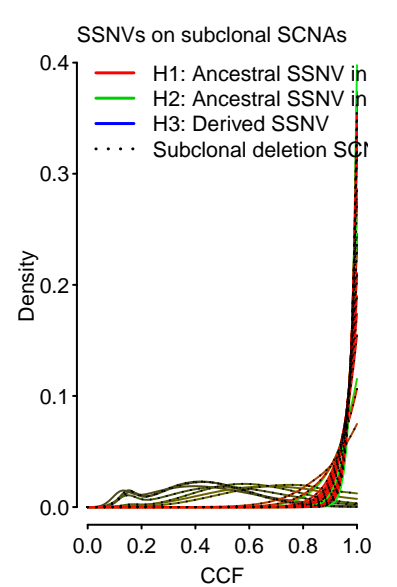

Sample 22

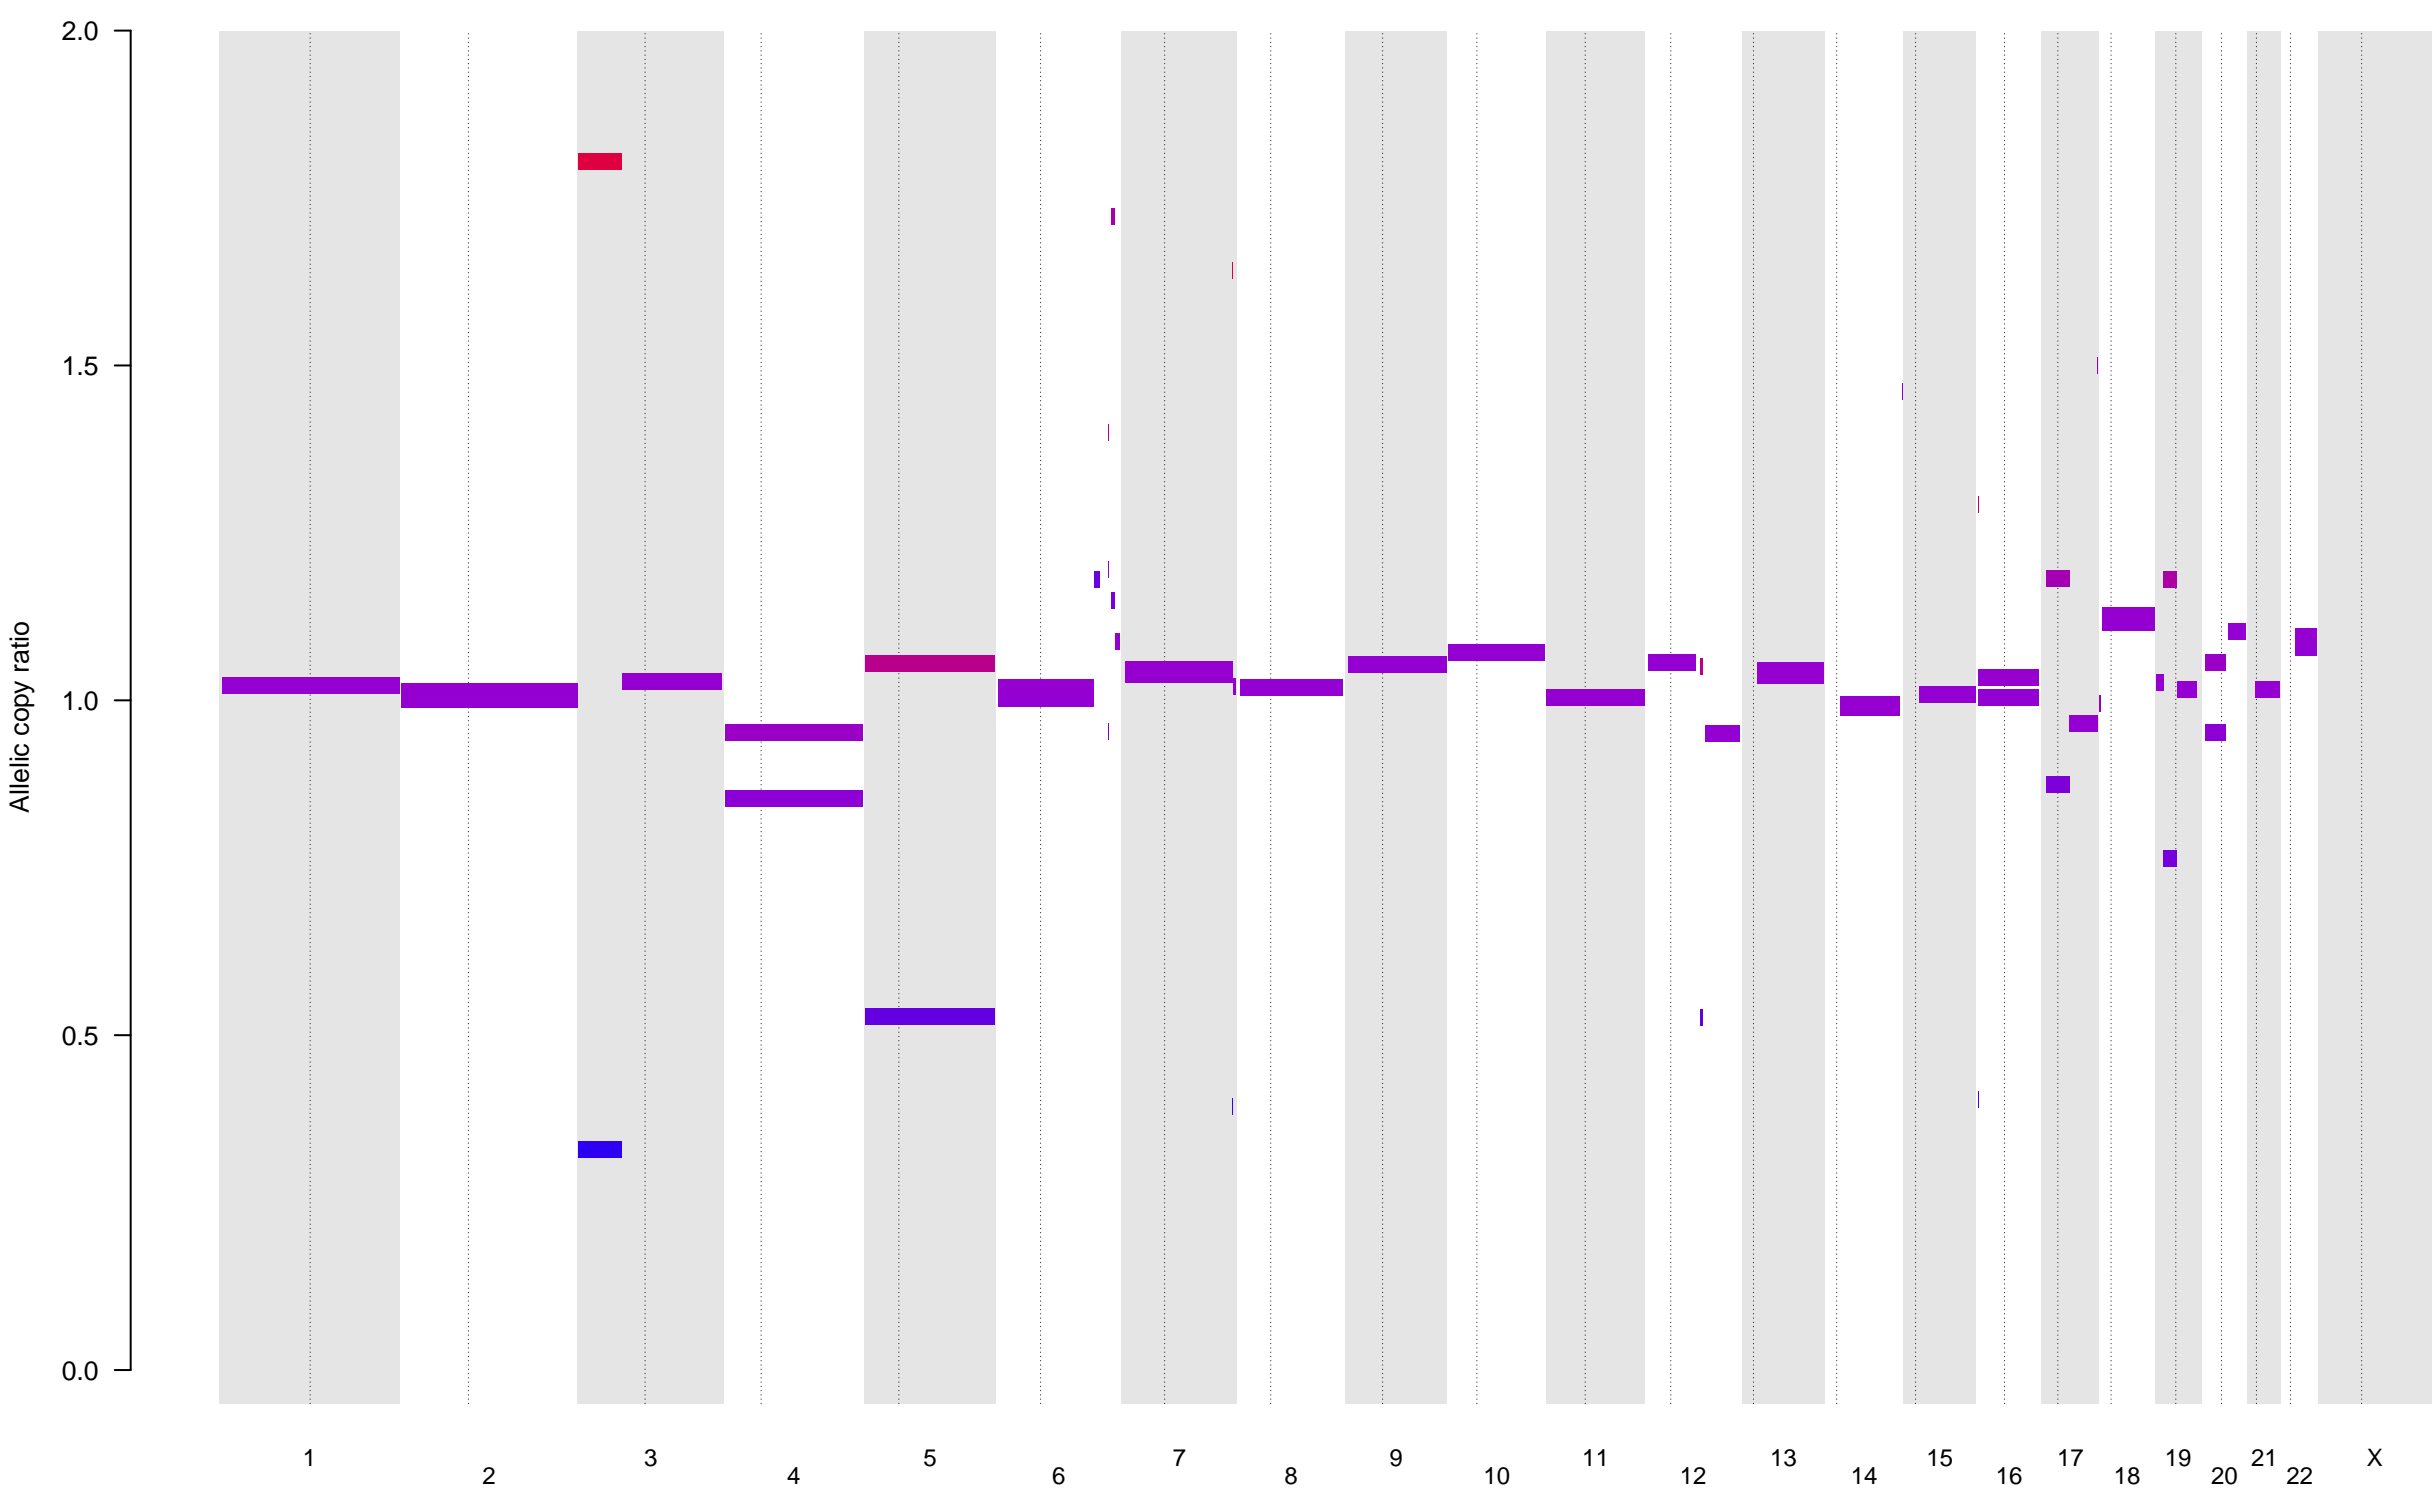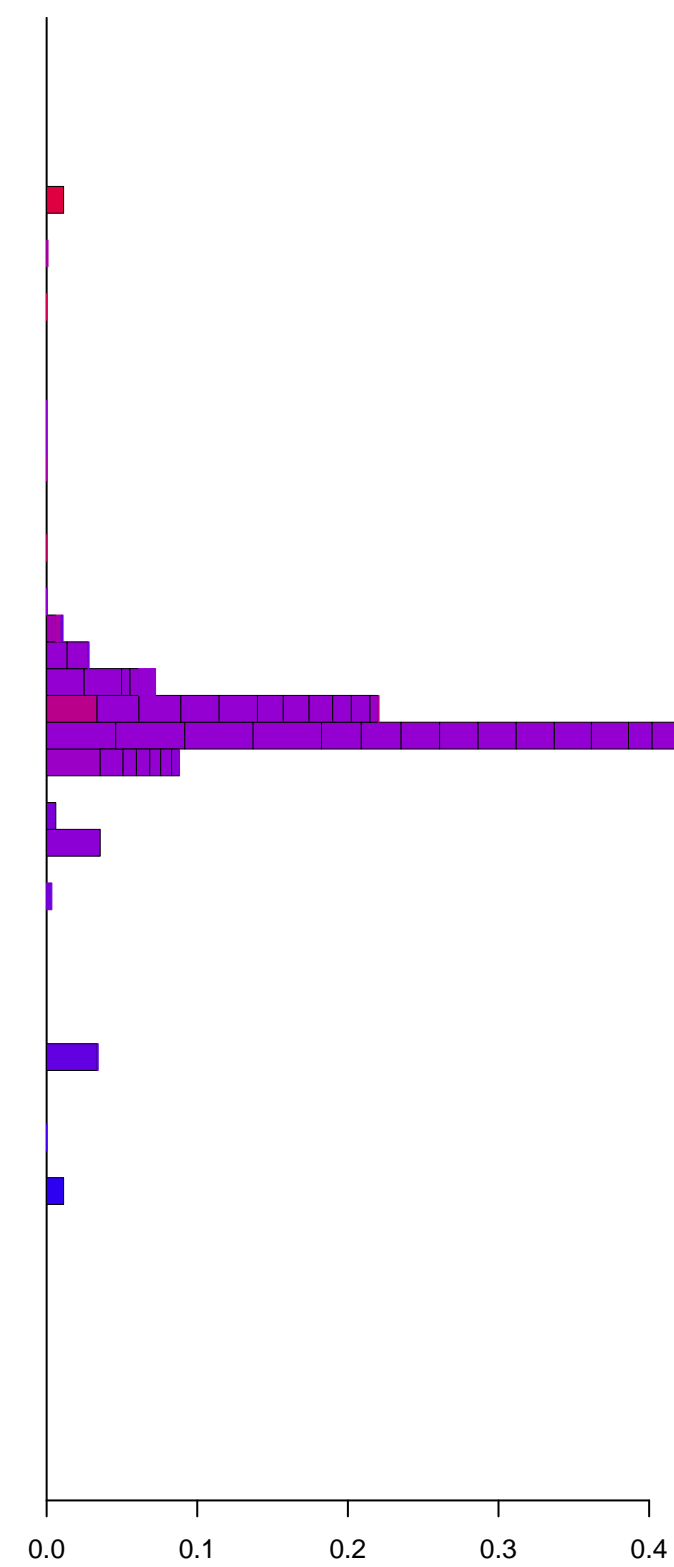

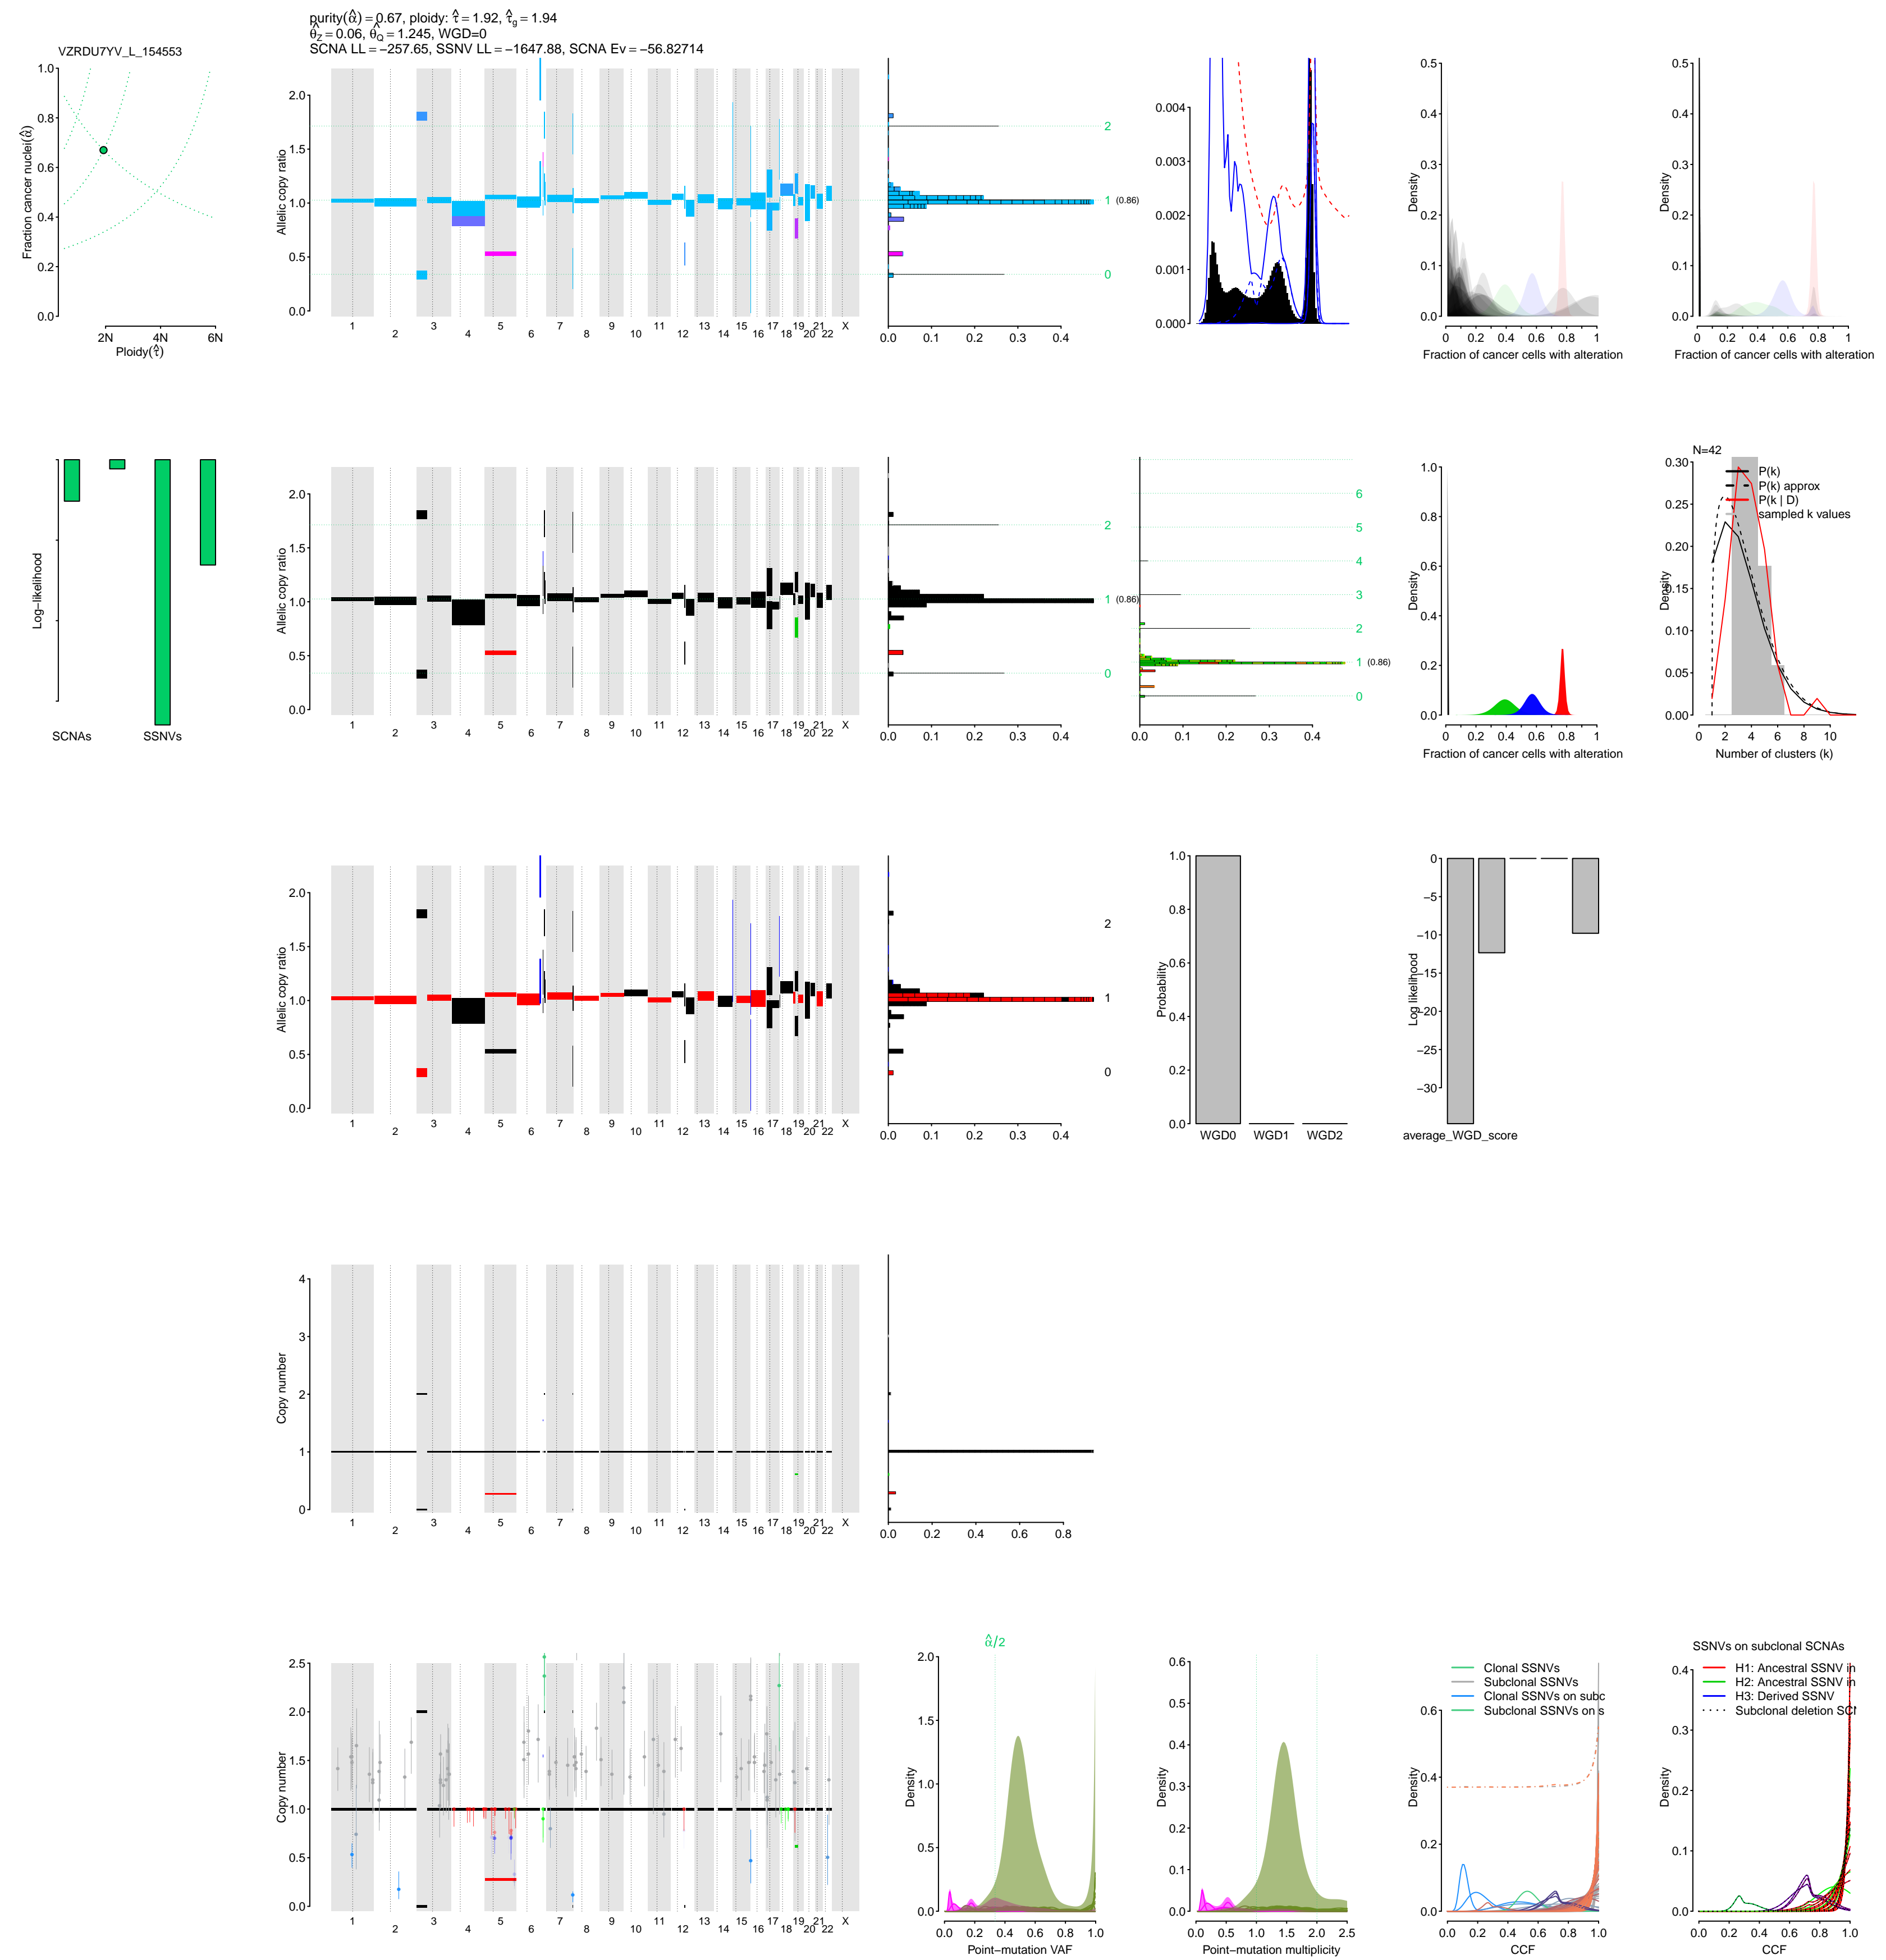

Sample 23

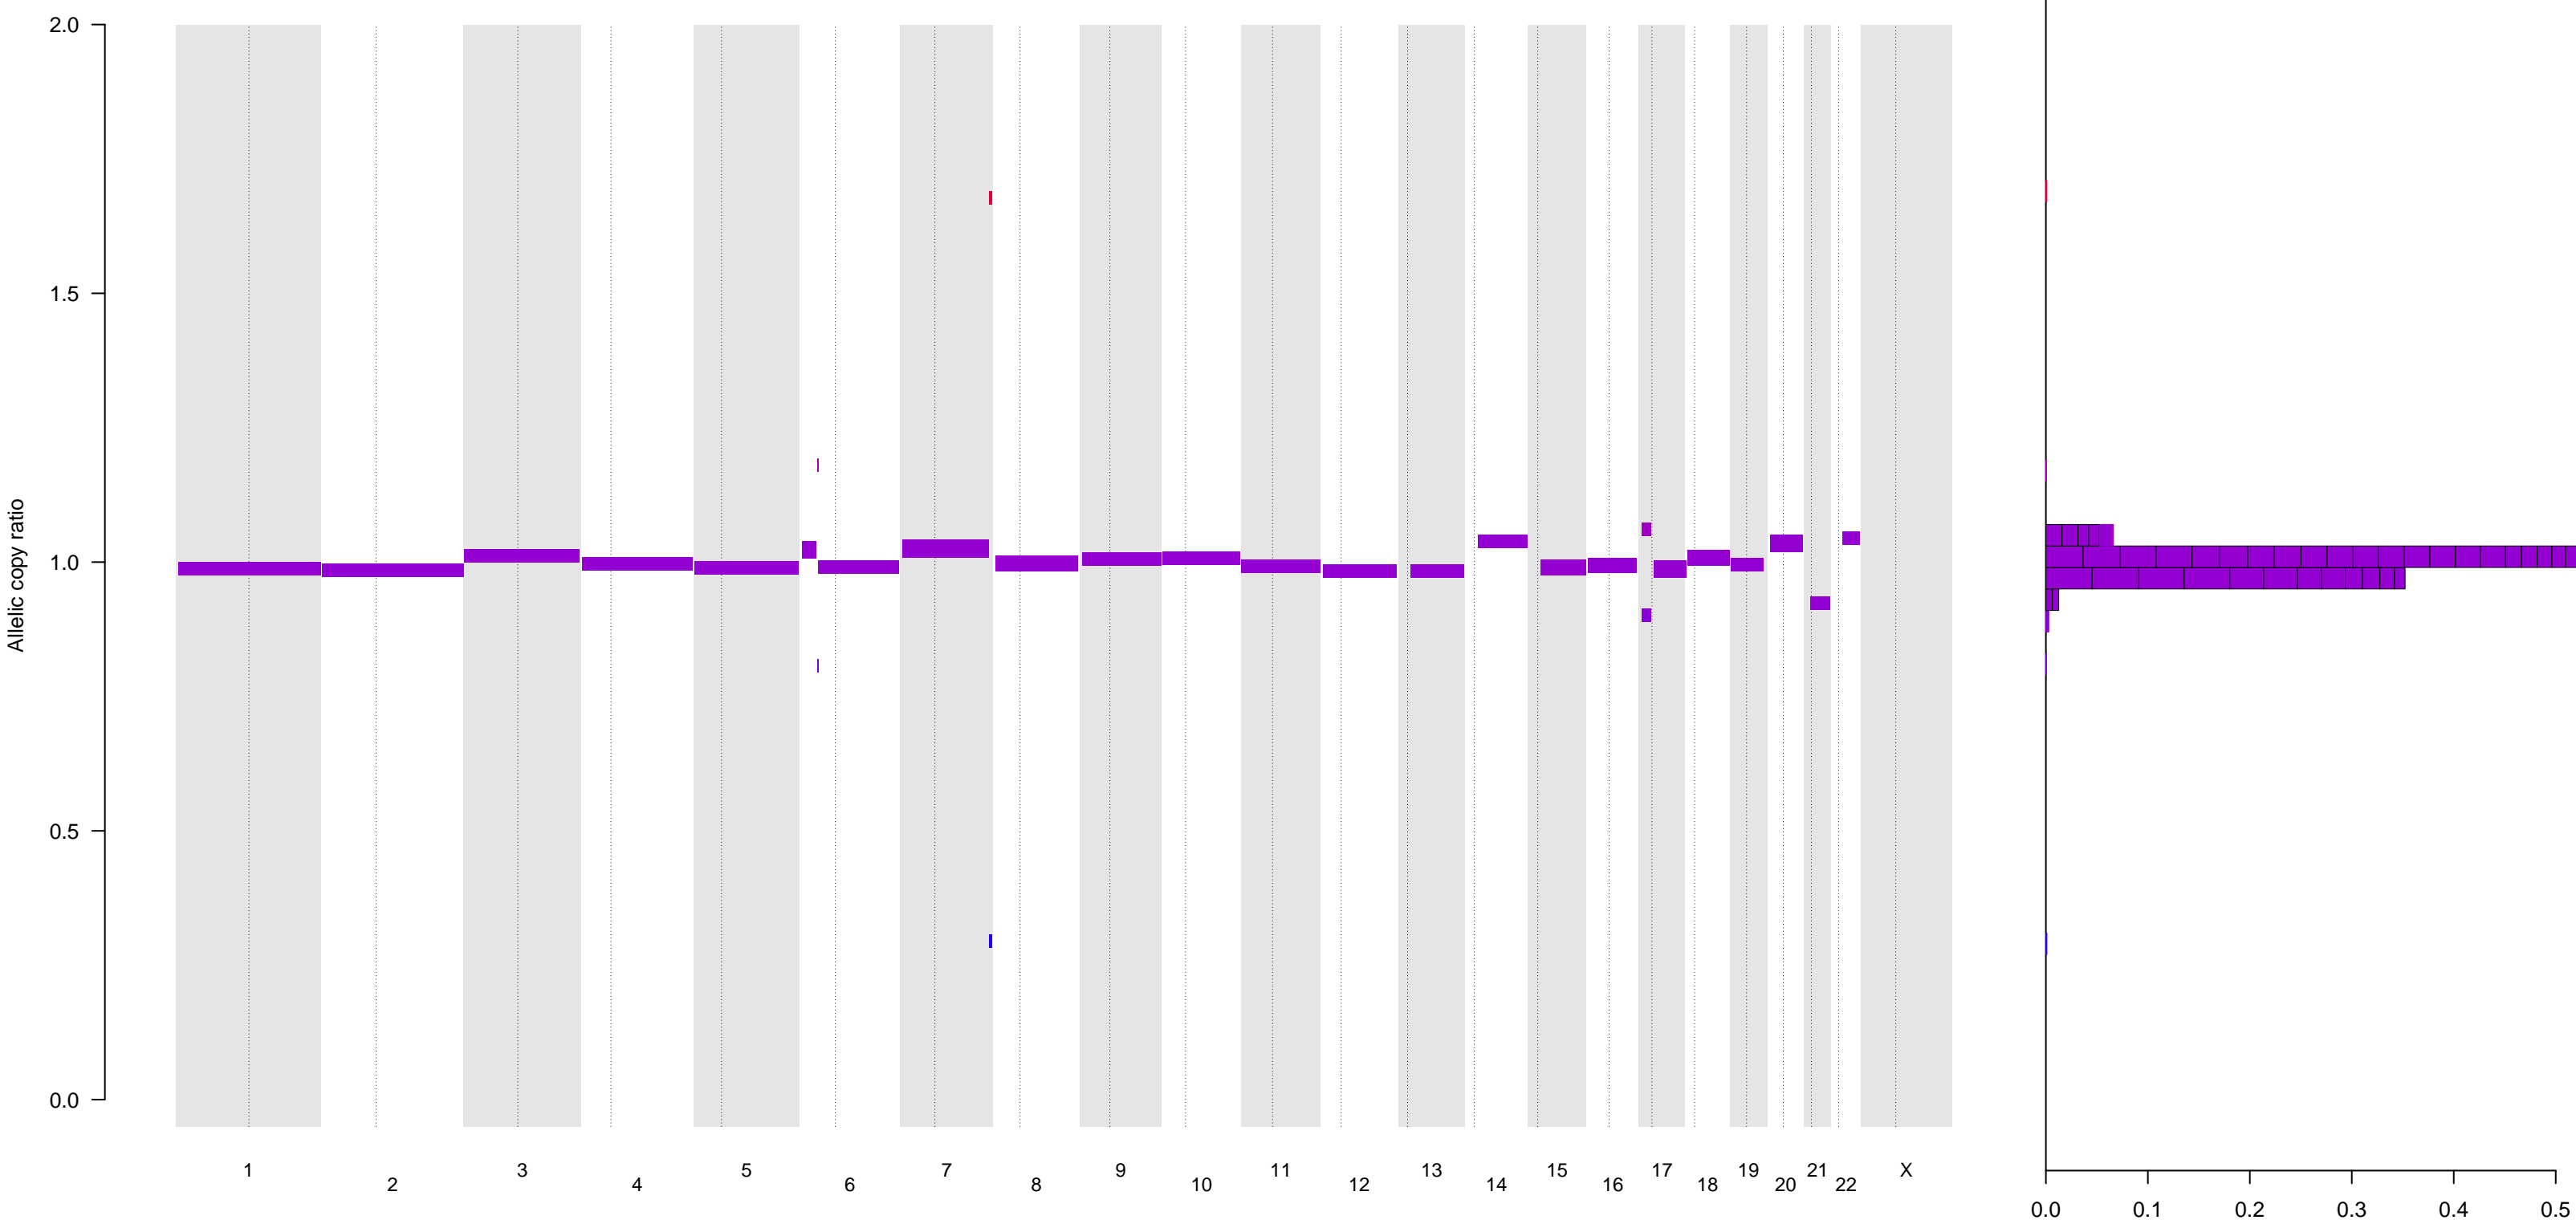

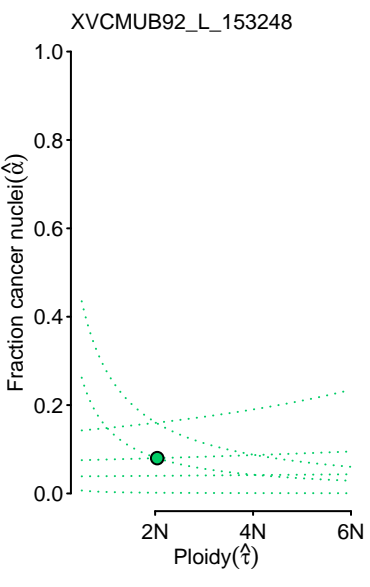

purity( $\hat{\alpha}$ ) = 0.08, ploidy:  $\hat{k} = 2.04$ ,  $\hat{k}_g = 2.04$   
 $\theta_z = 0$ ,  $\theta_0 = 1.265$ , WGD=0  
 SCNA LL = -196.15, SSNV LL = -17128.09, SCNA Ev = -48.90816

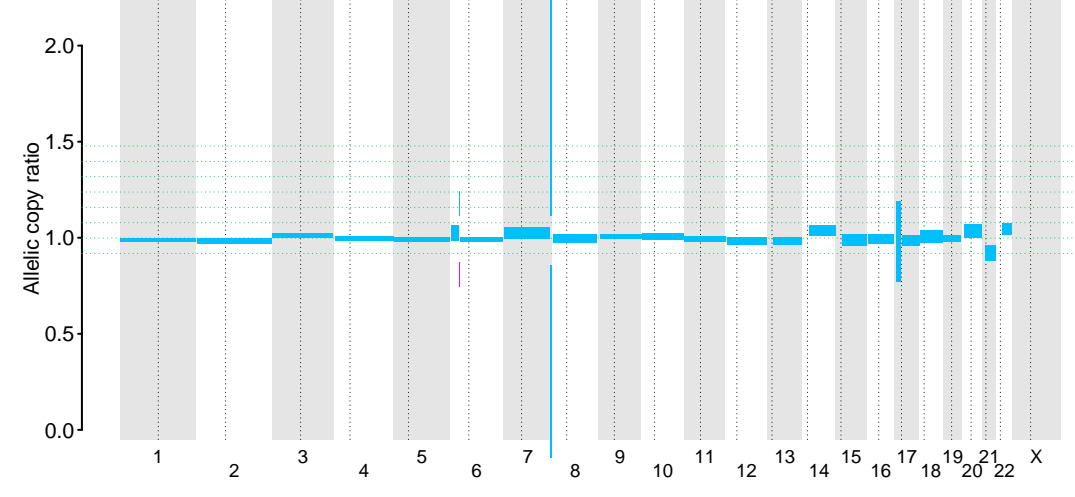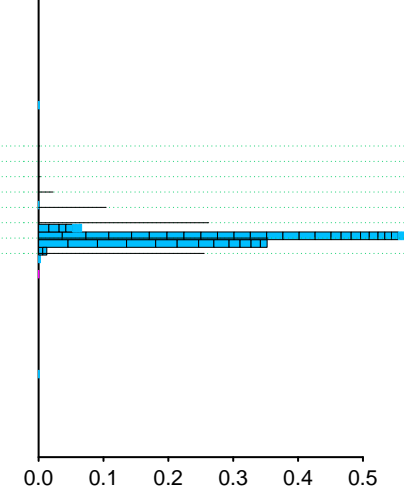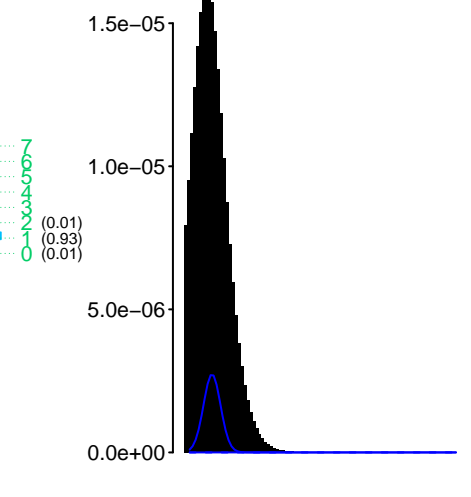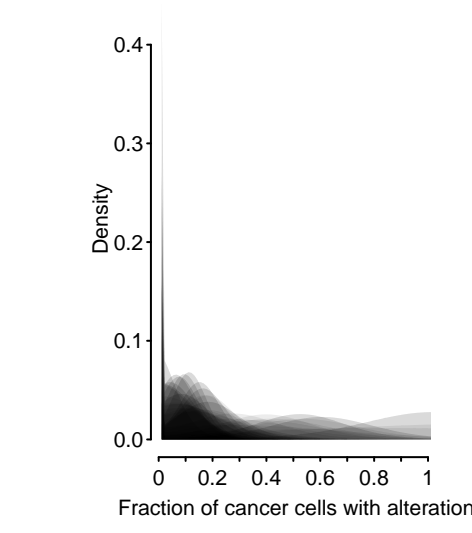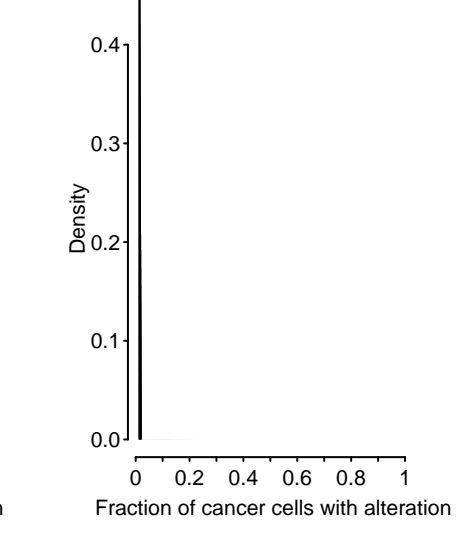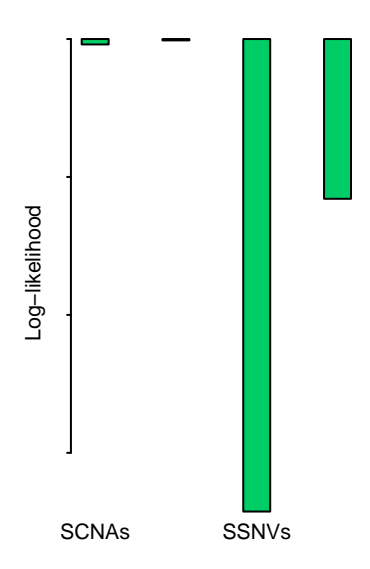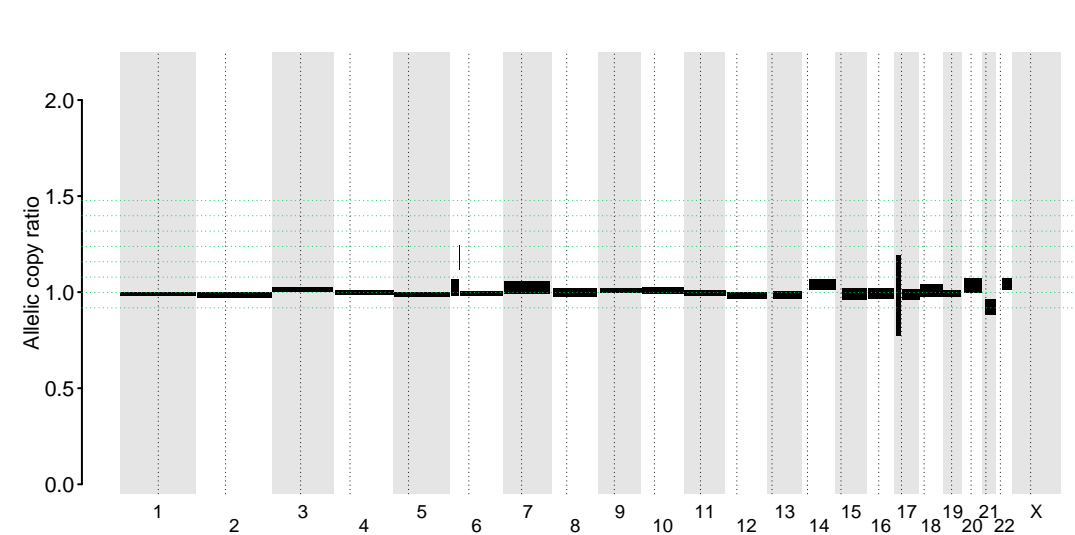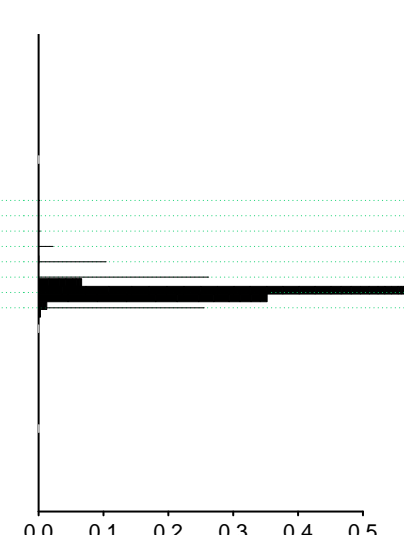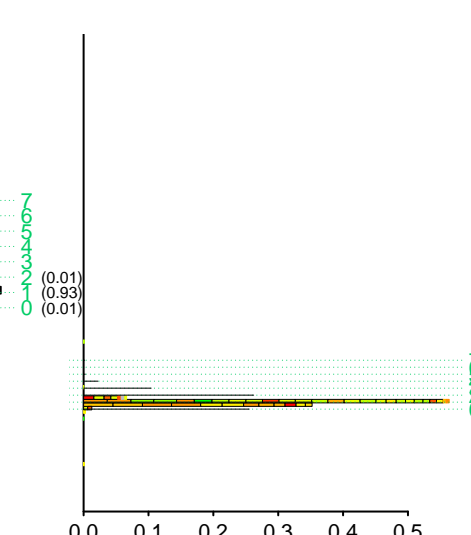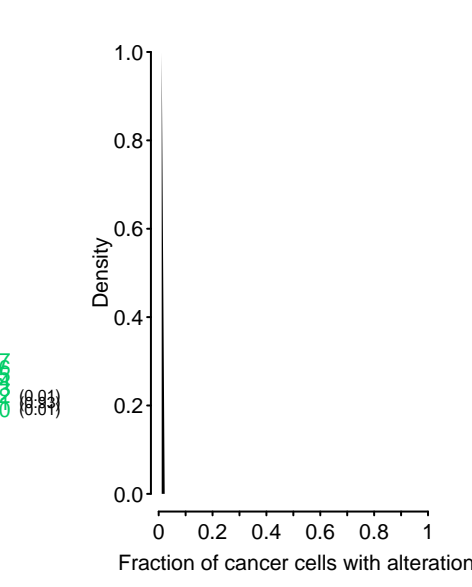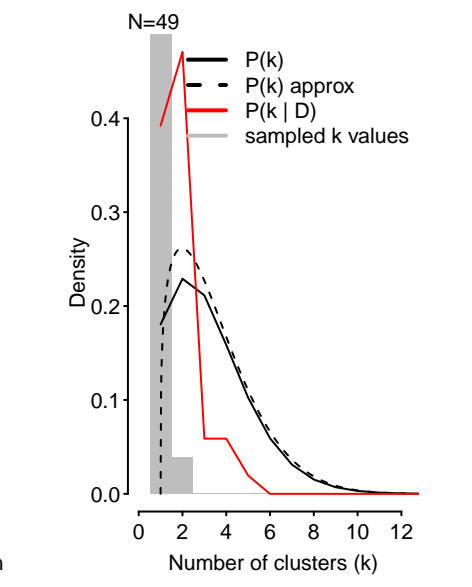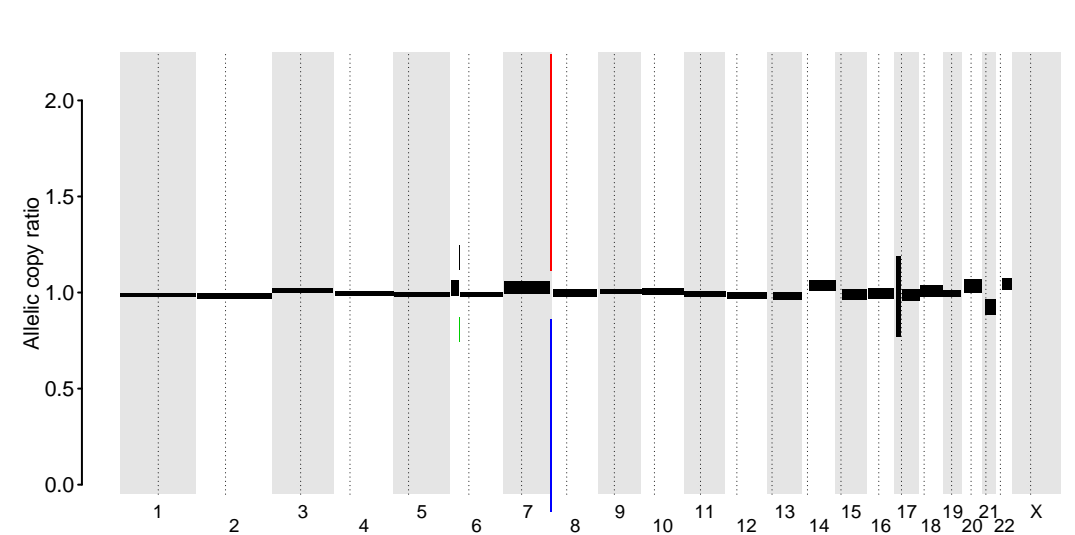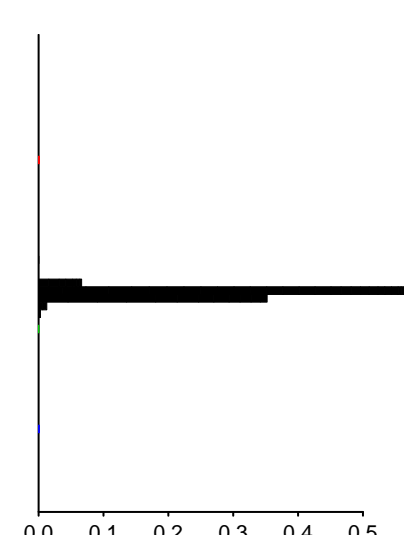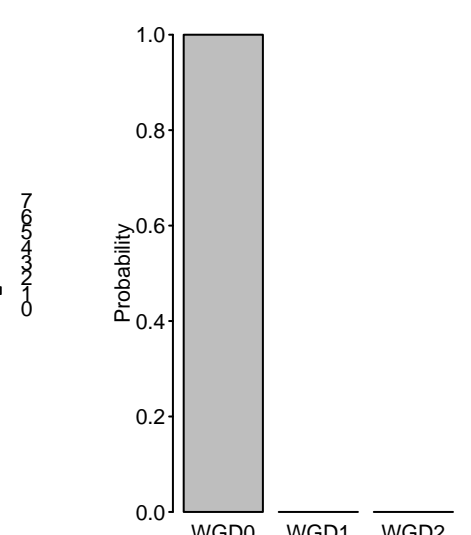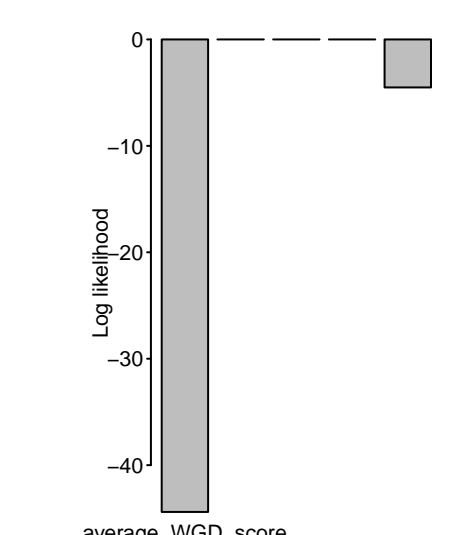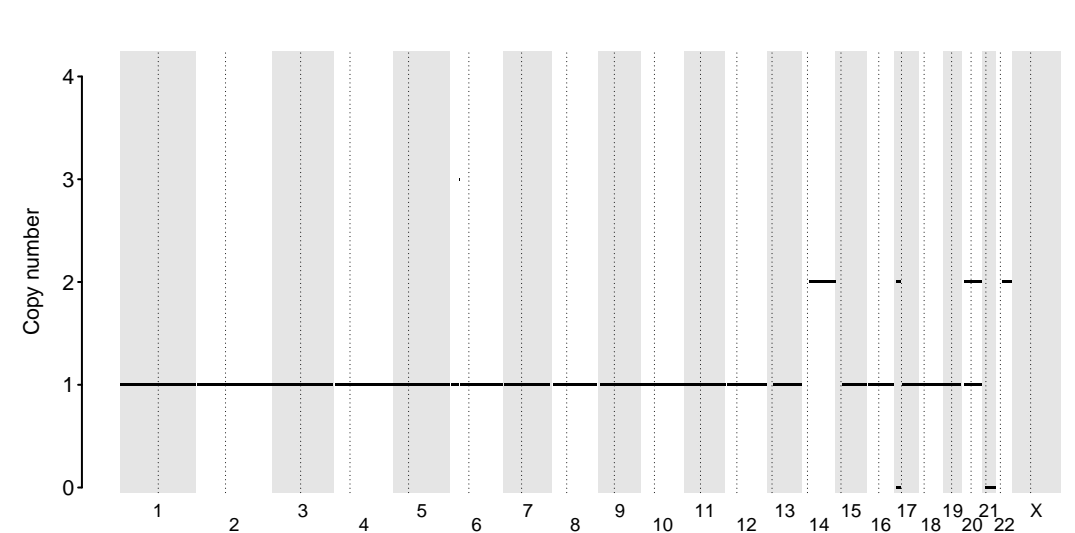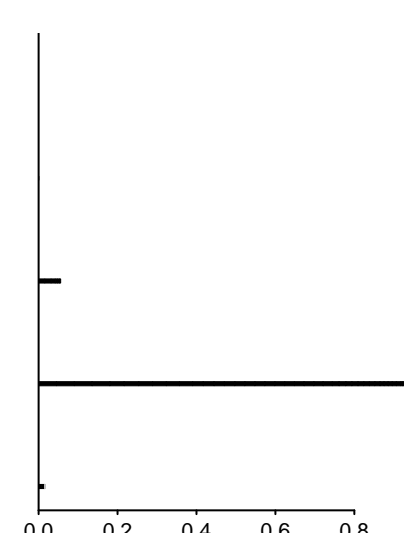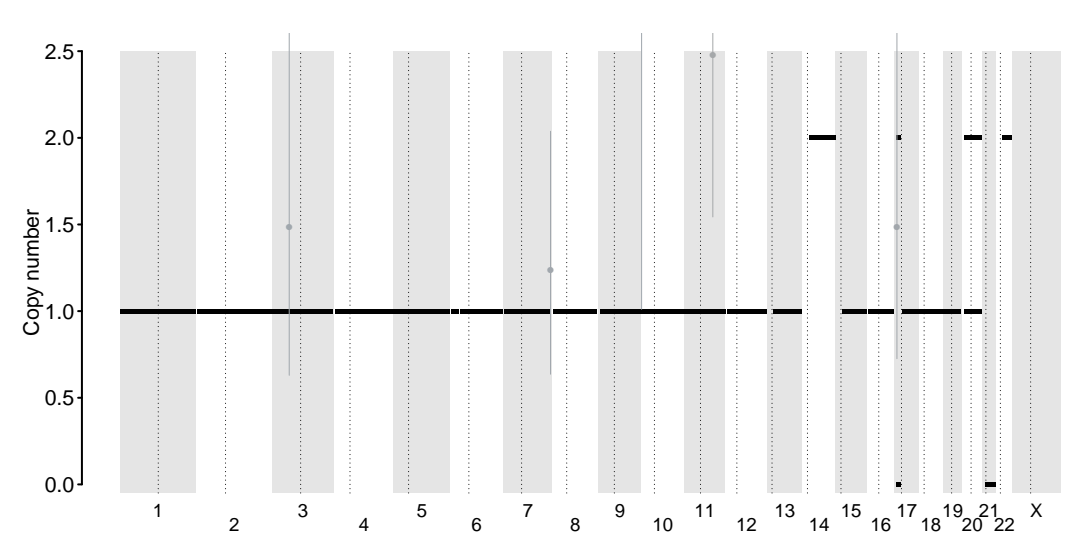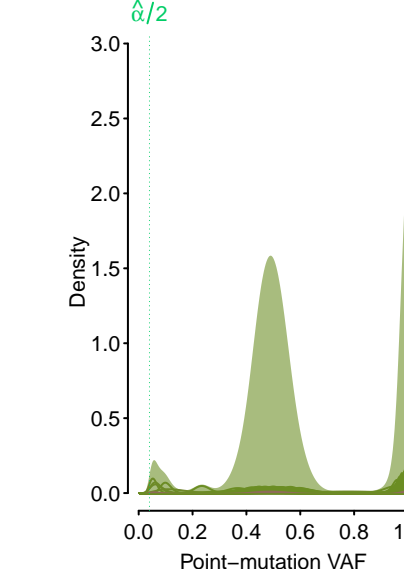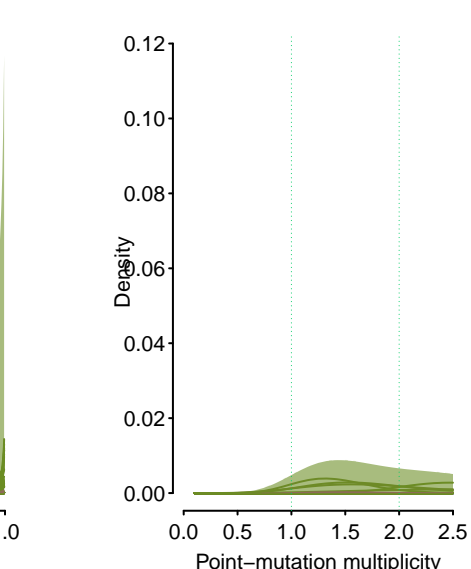

Sample 24

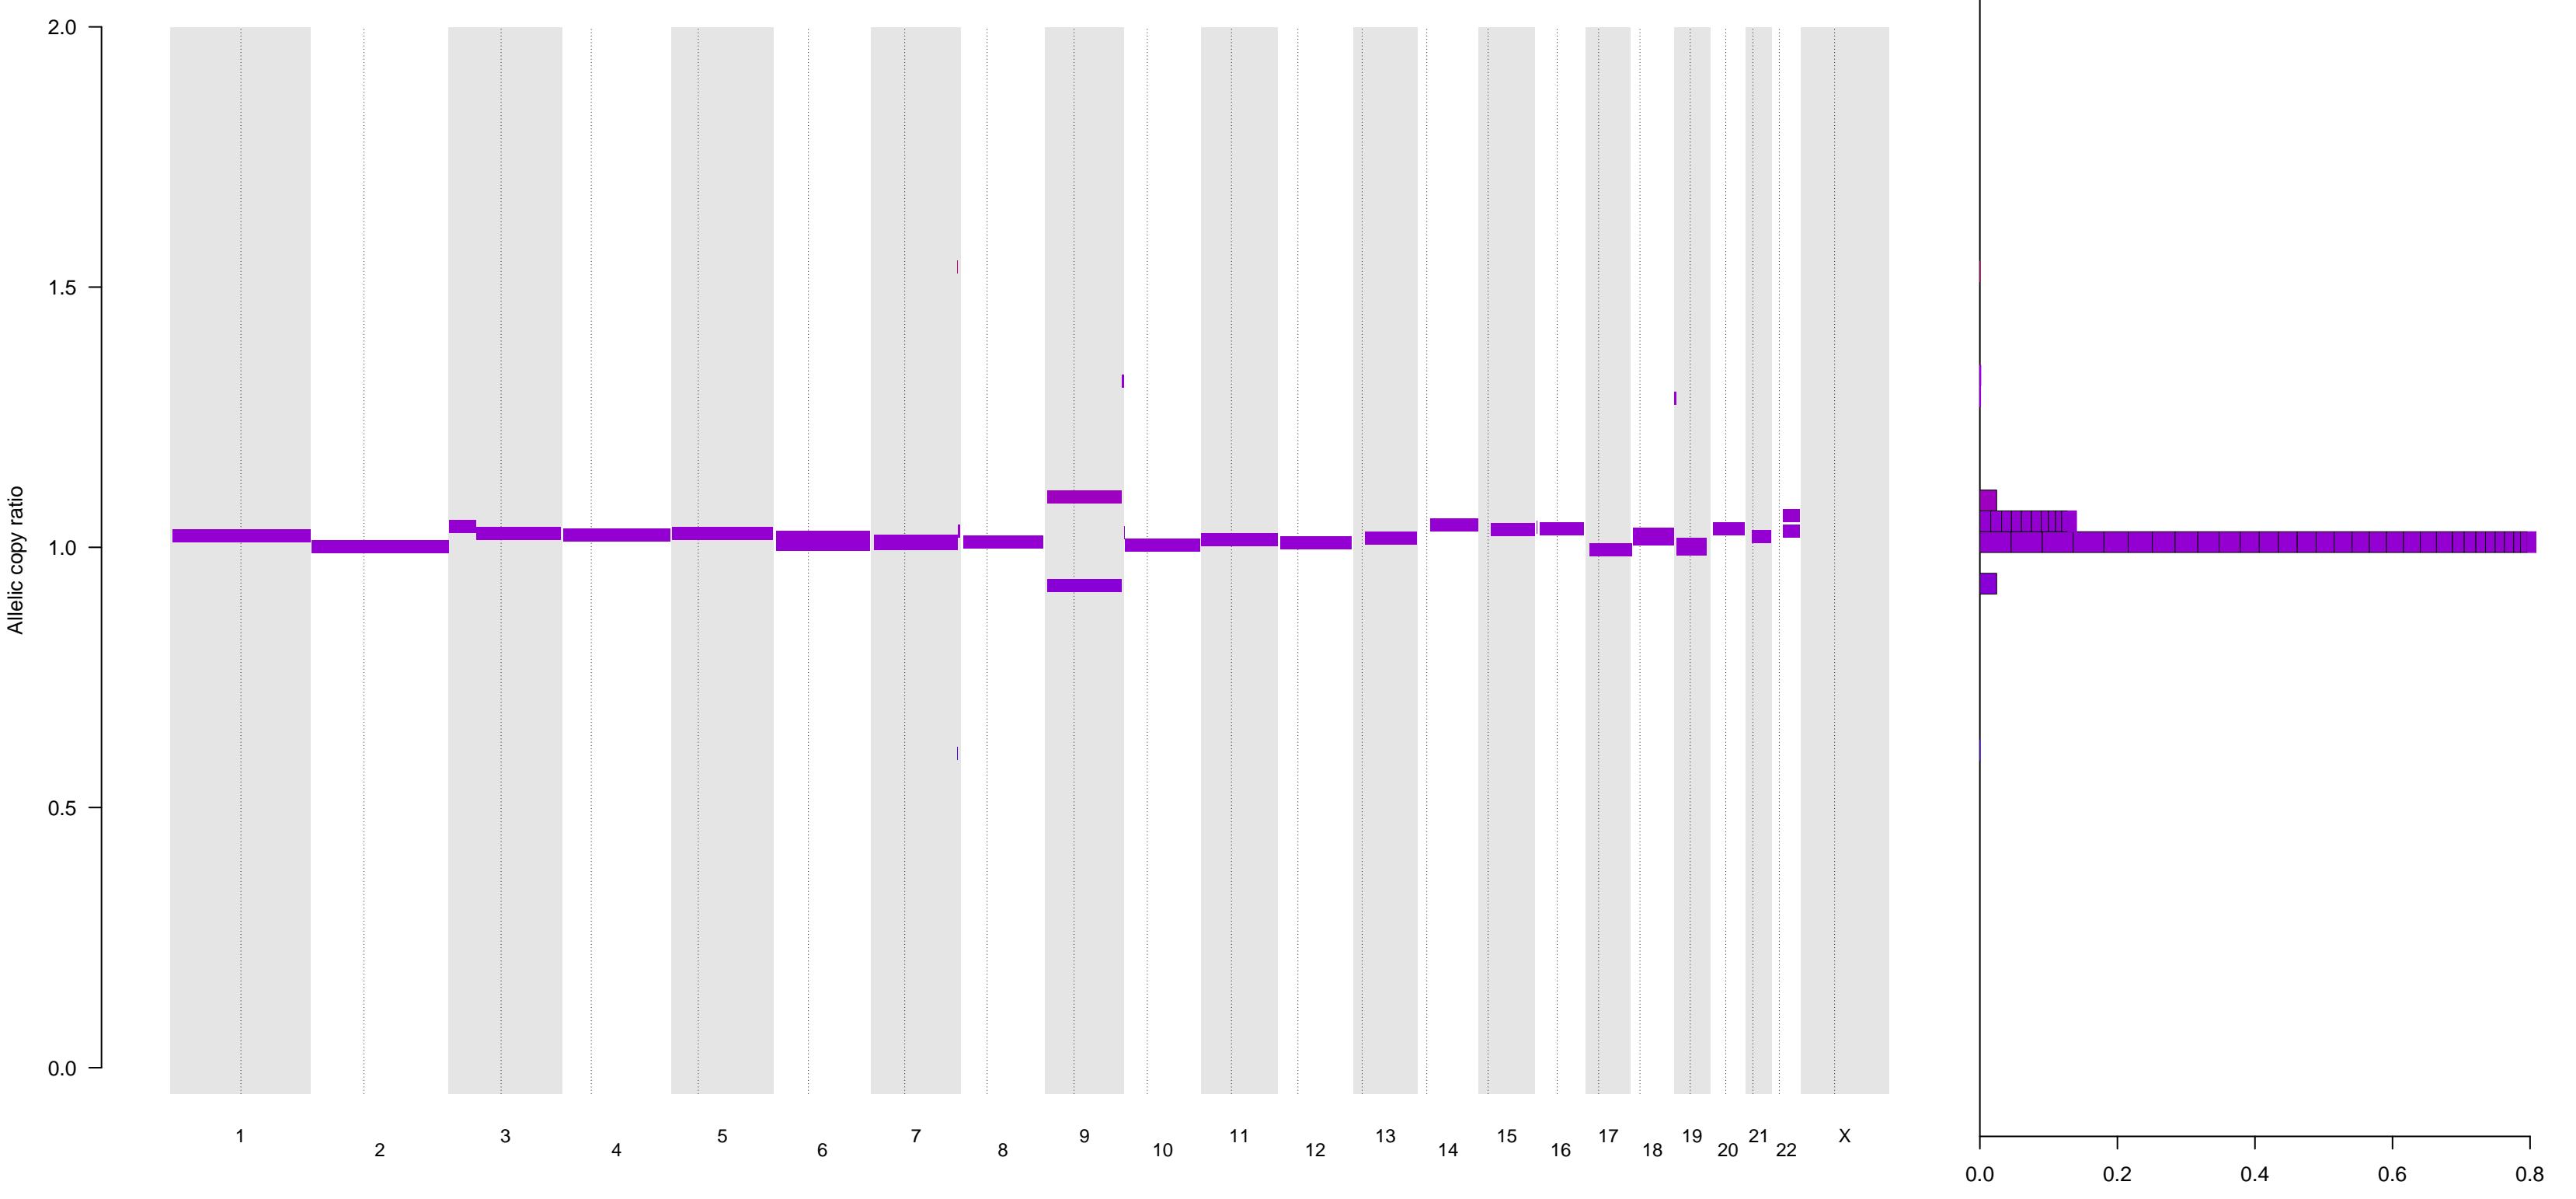



$\text{purity}(\hat{\alpha}) = 0.07$ , ploidy:  $\hat{t} = 1.3$ ,  $\hat{t}_g = 2.01$   
 $\theta_z = 0.01$ ,  $\theta_a = 1.94$ , WGD=0  
 SCNA LL = -239.39, SSNV LL = -14088.13, SCNA Ev = -37.36297

YWV8UB70\_L\_154517

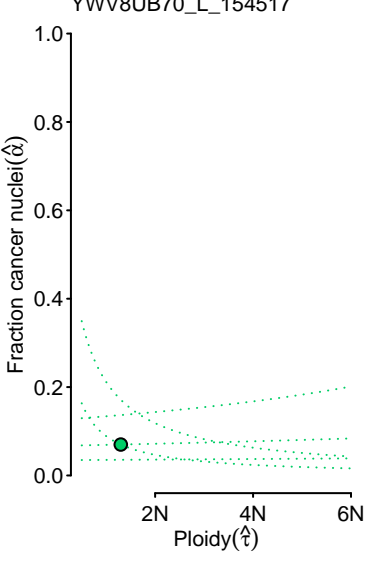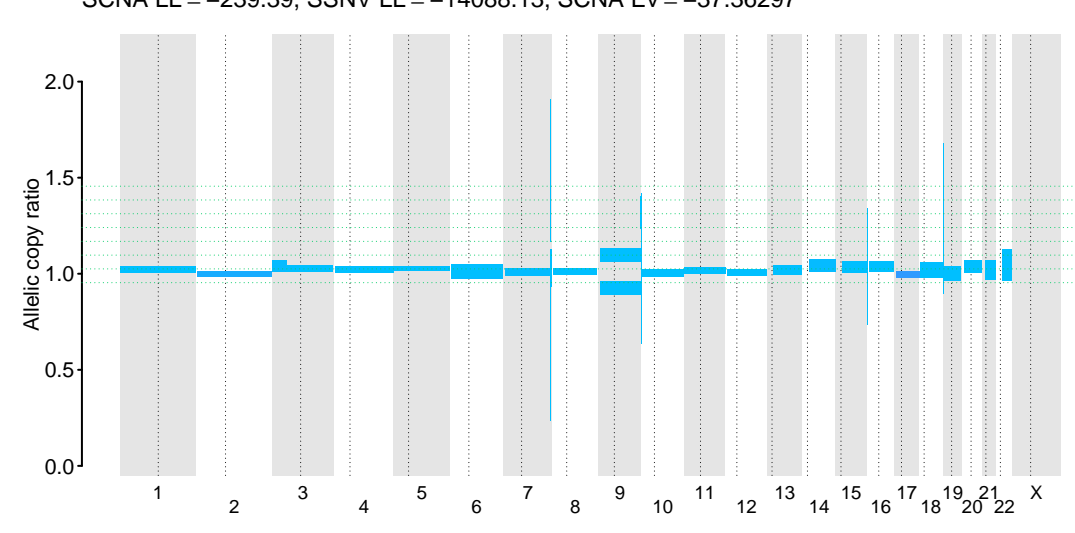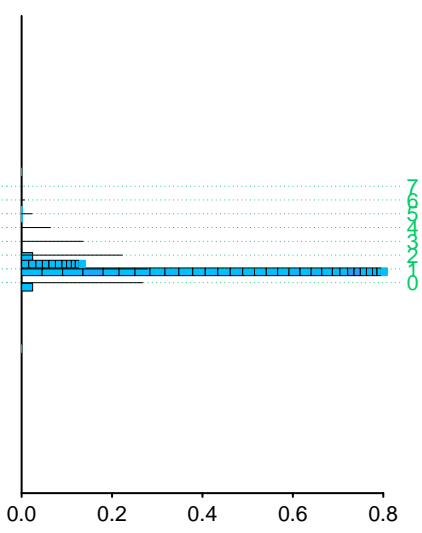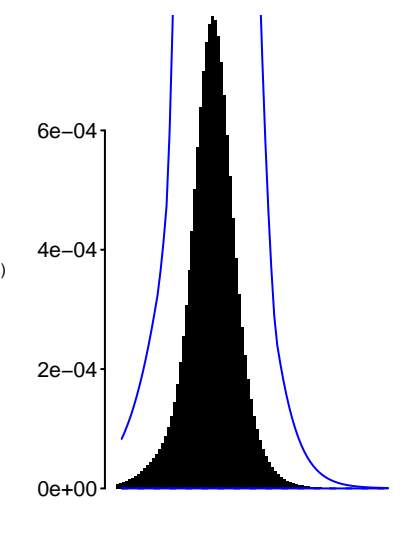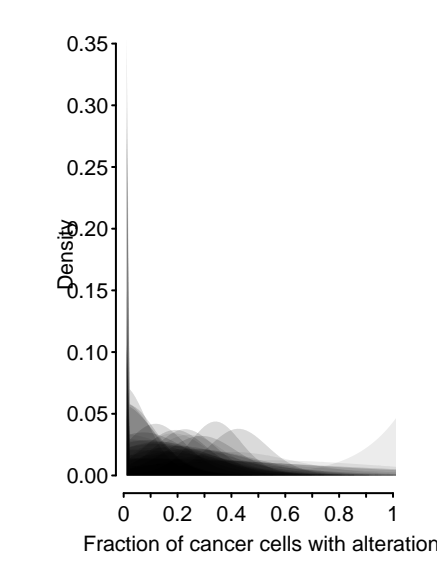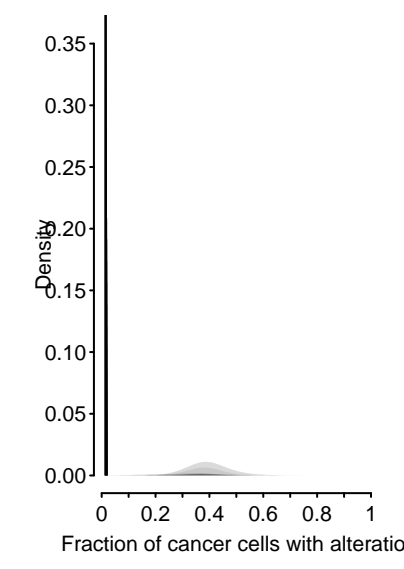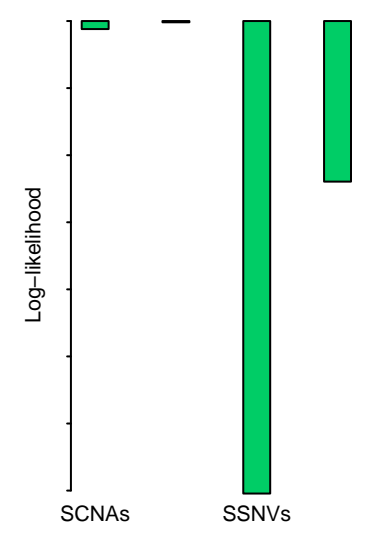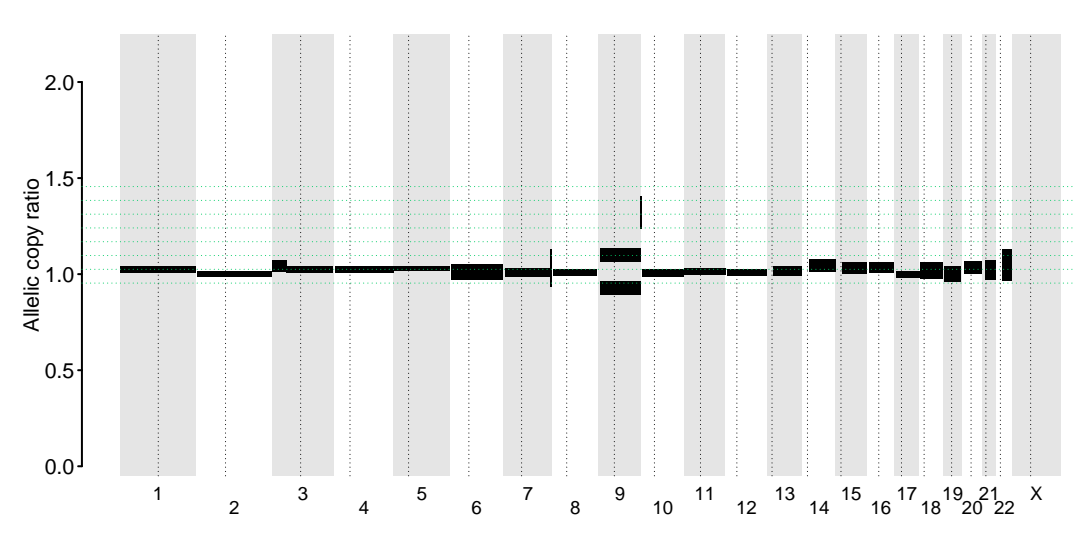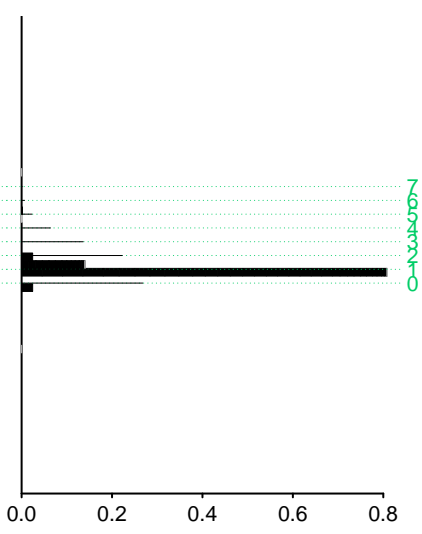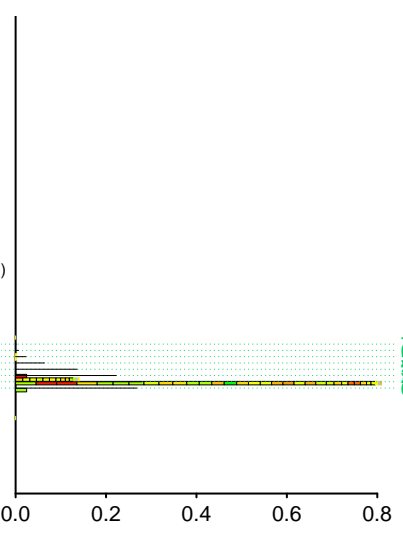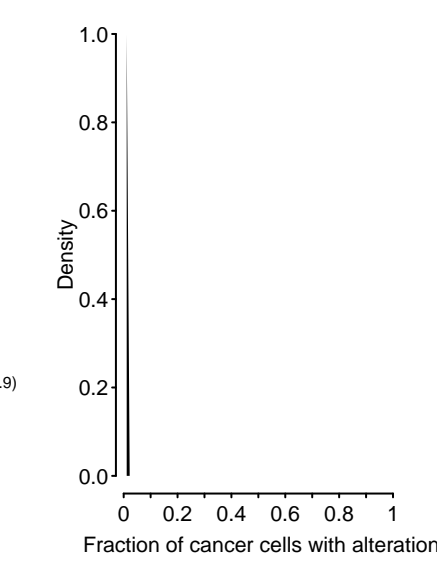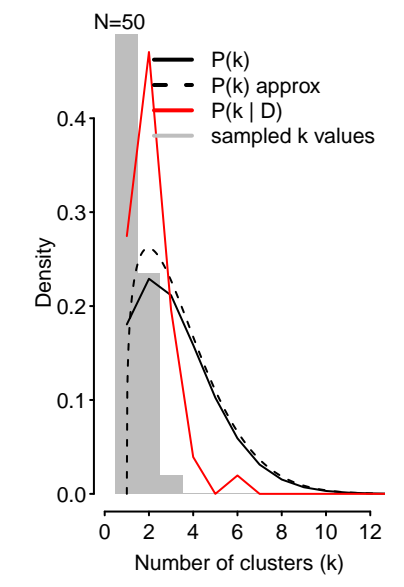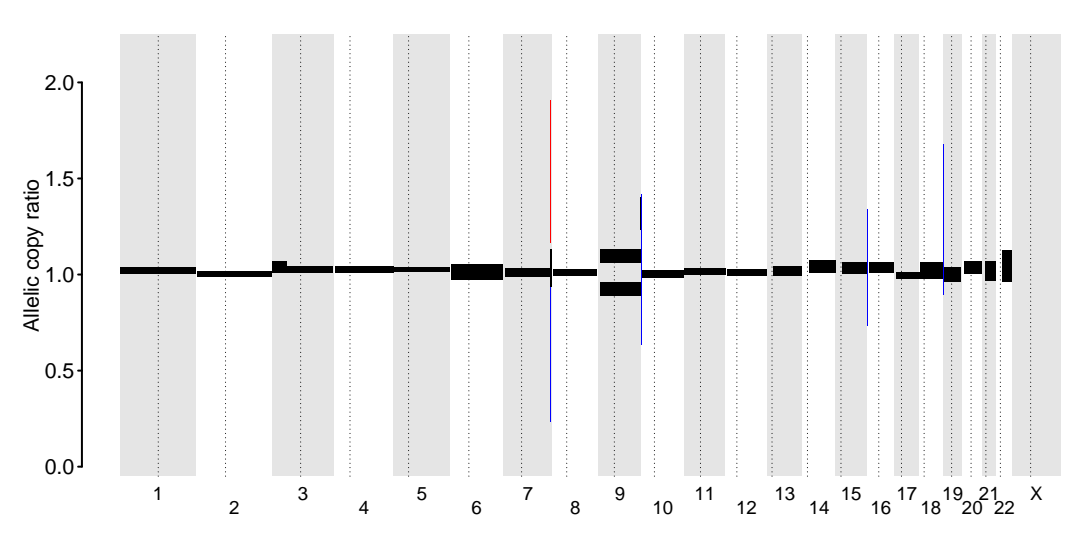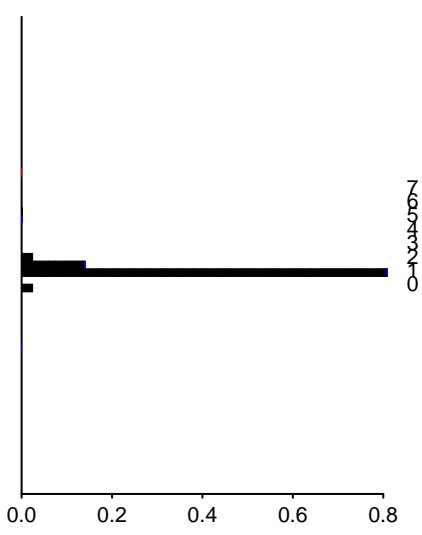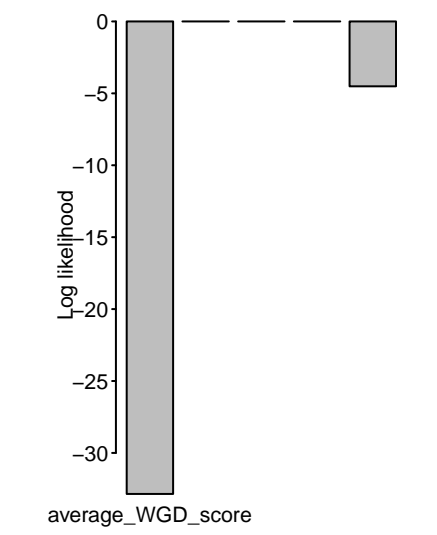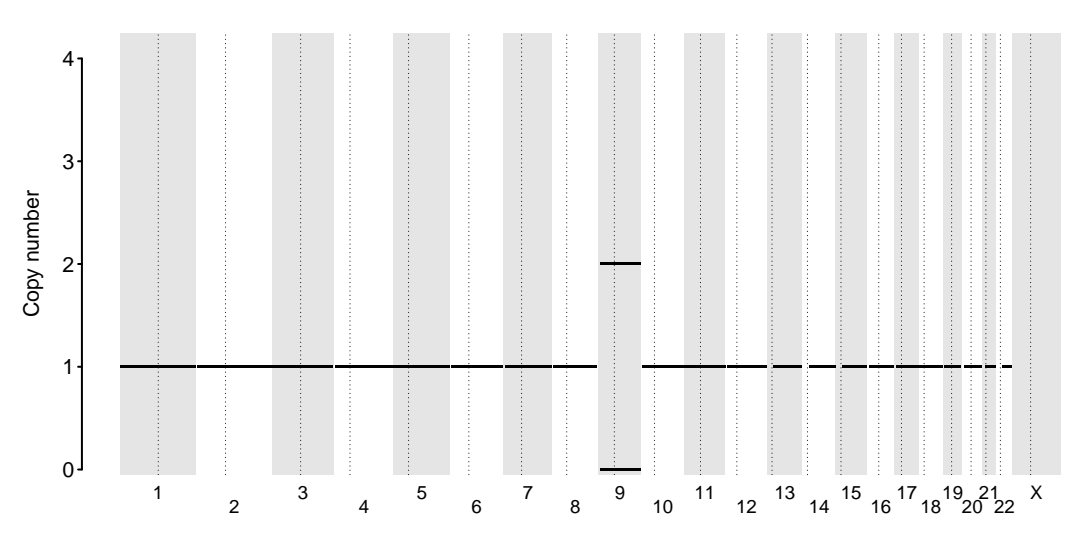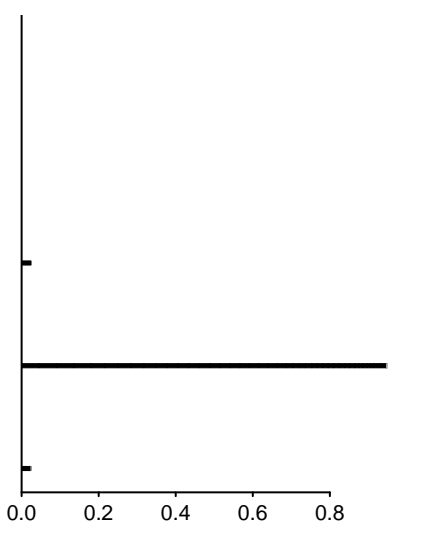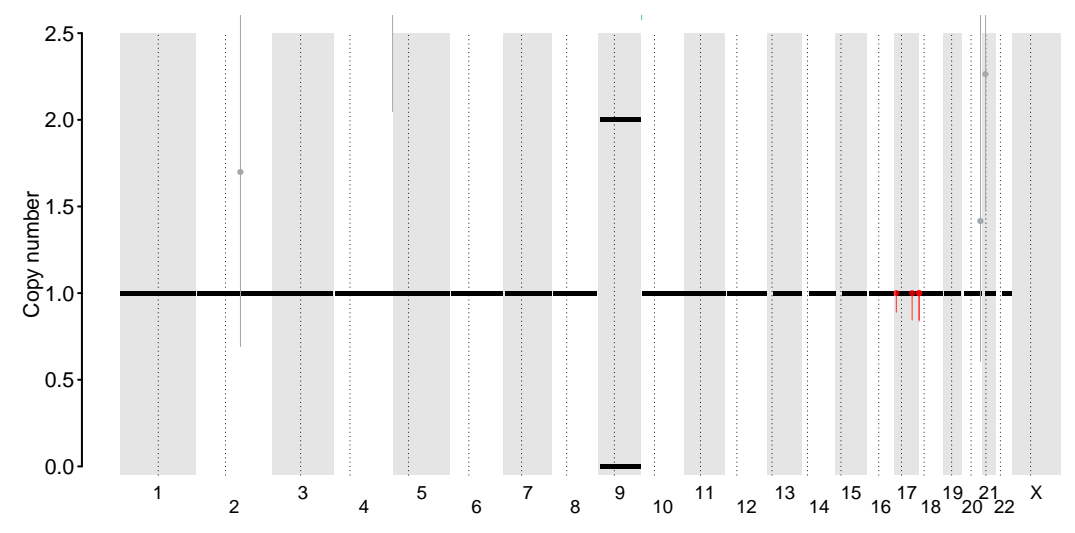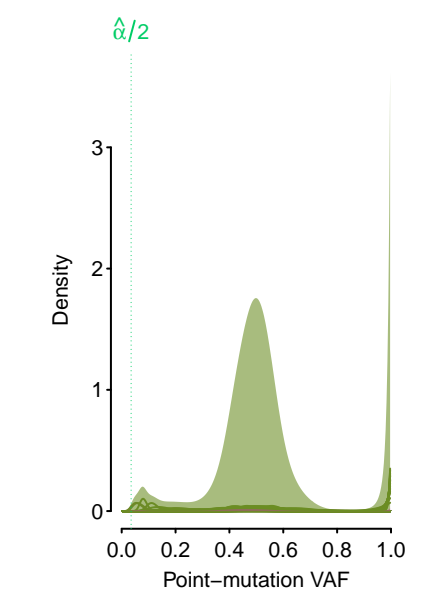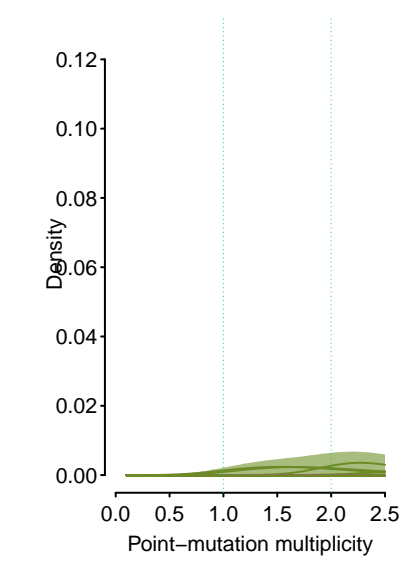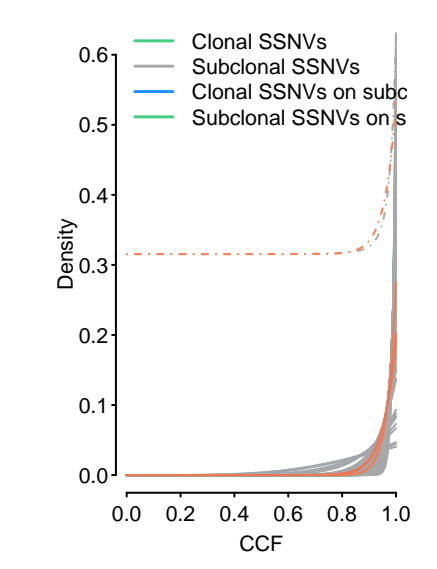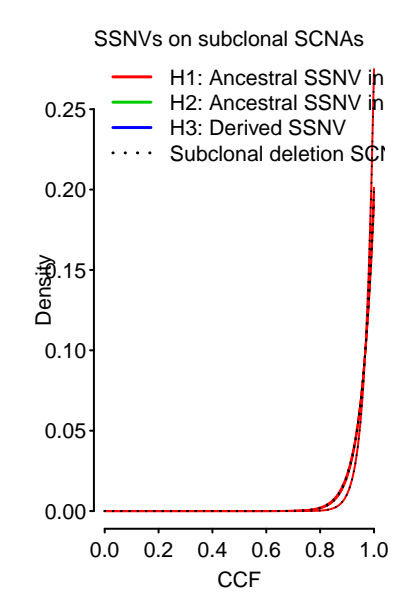

Supplement: NIHMS957398-supplement-7.pdf [file NIHMS957398-supplement-7.pdf]
