# Supplementary material
Source: PubMed Central journal article supplement (PMC6035092)
Supplement: NIHMS957398-supplement-6.pdf [file NIHMS957398-supplement-6.pdf]

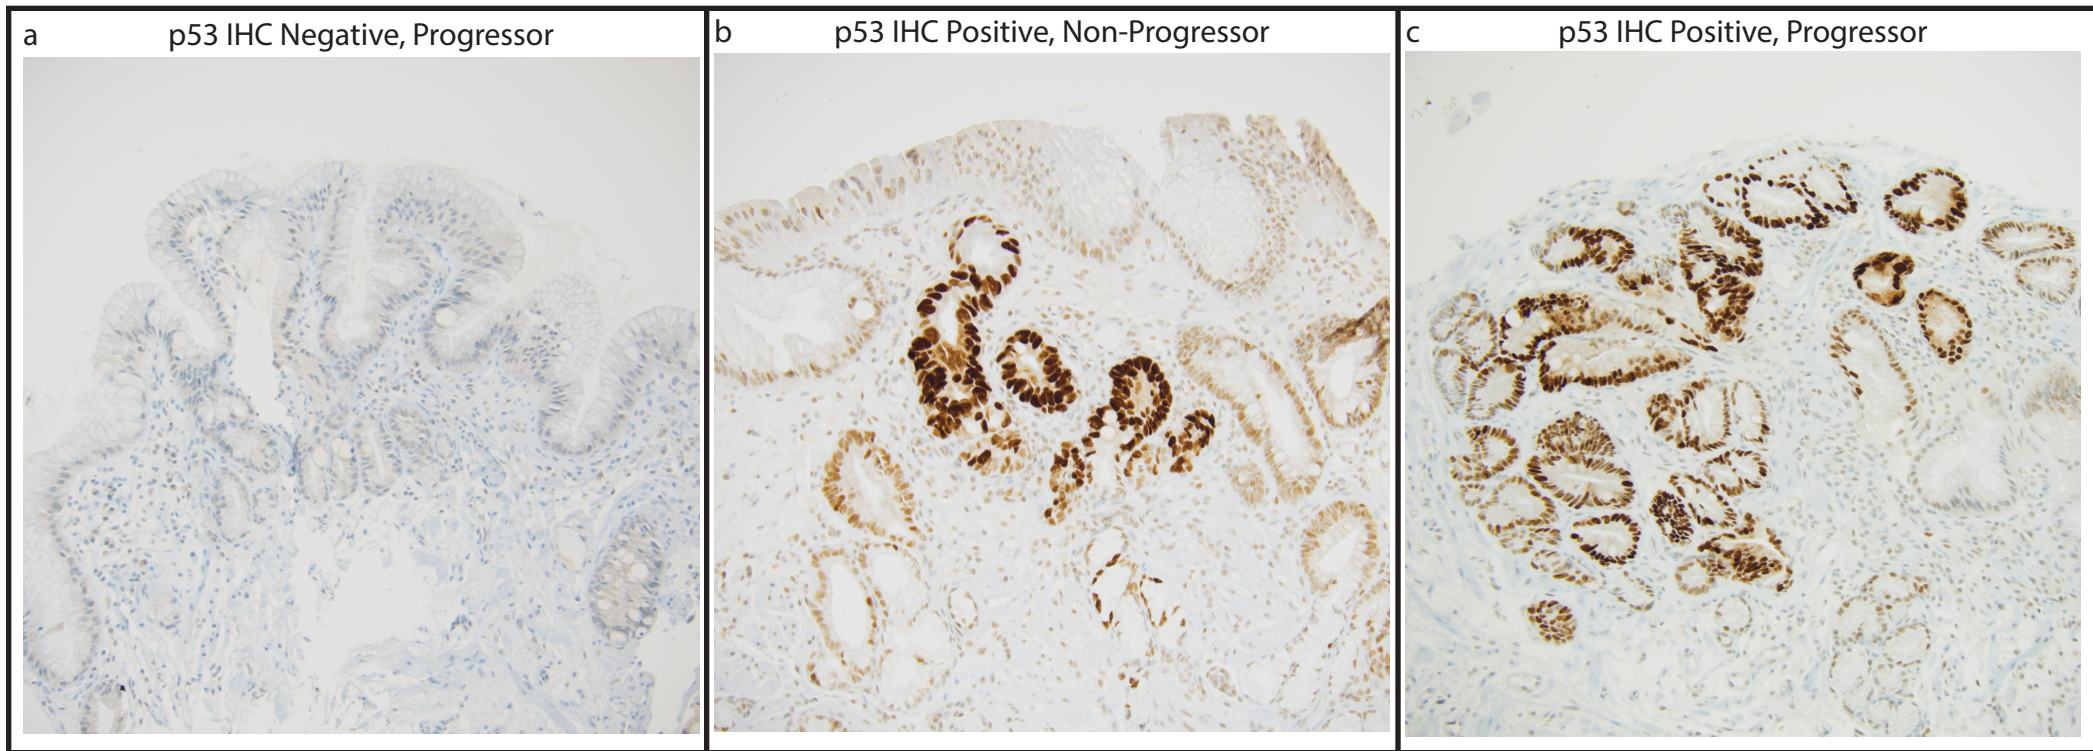

**Supplementary Figure 5: p53 immunohistochemistry.** Immunohistochemistry (IHC) was performed on samples where additional tissue was available after genomic analysis. Both increased nuclear staining and complete absence of staining was called positive (online methods). Examples are from a) p53 IHC negative b) p53 IHC positive in a non-progressor c) p53 IHC positive in a progressor
