# Supplementary material
Source: PubMed Central journal article supplement (PMC6035092)

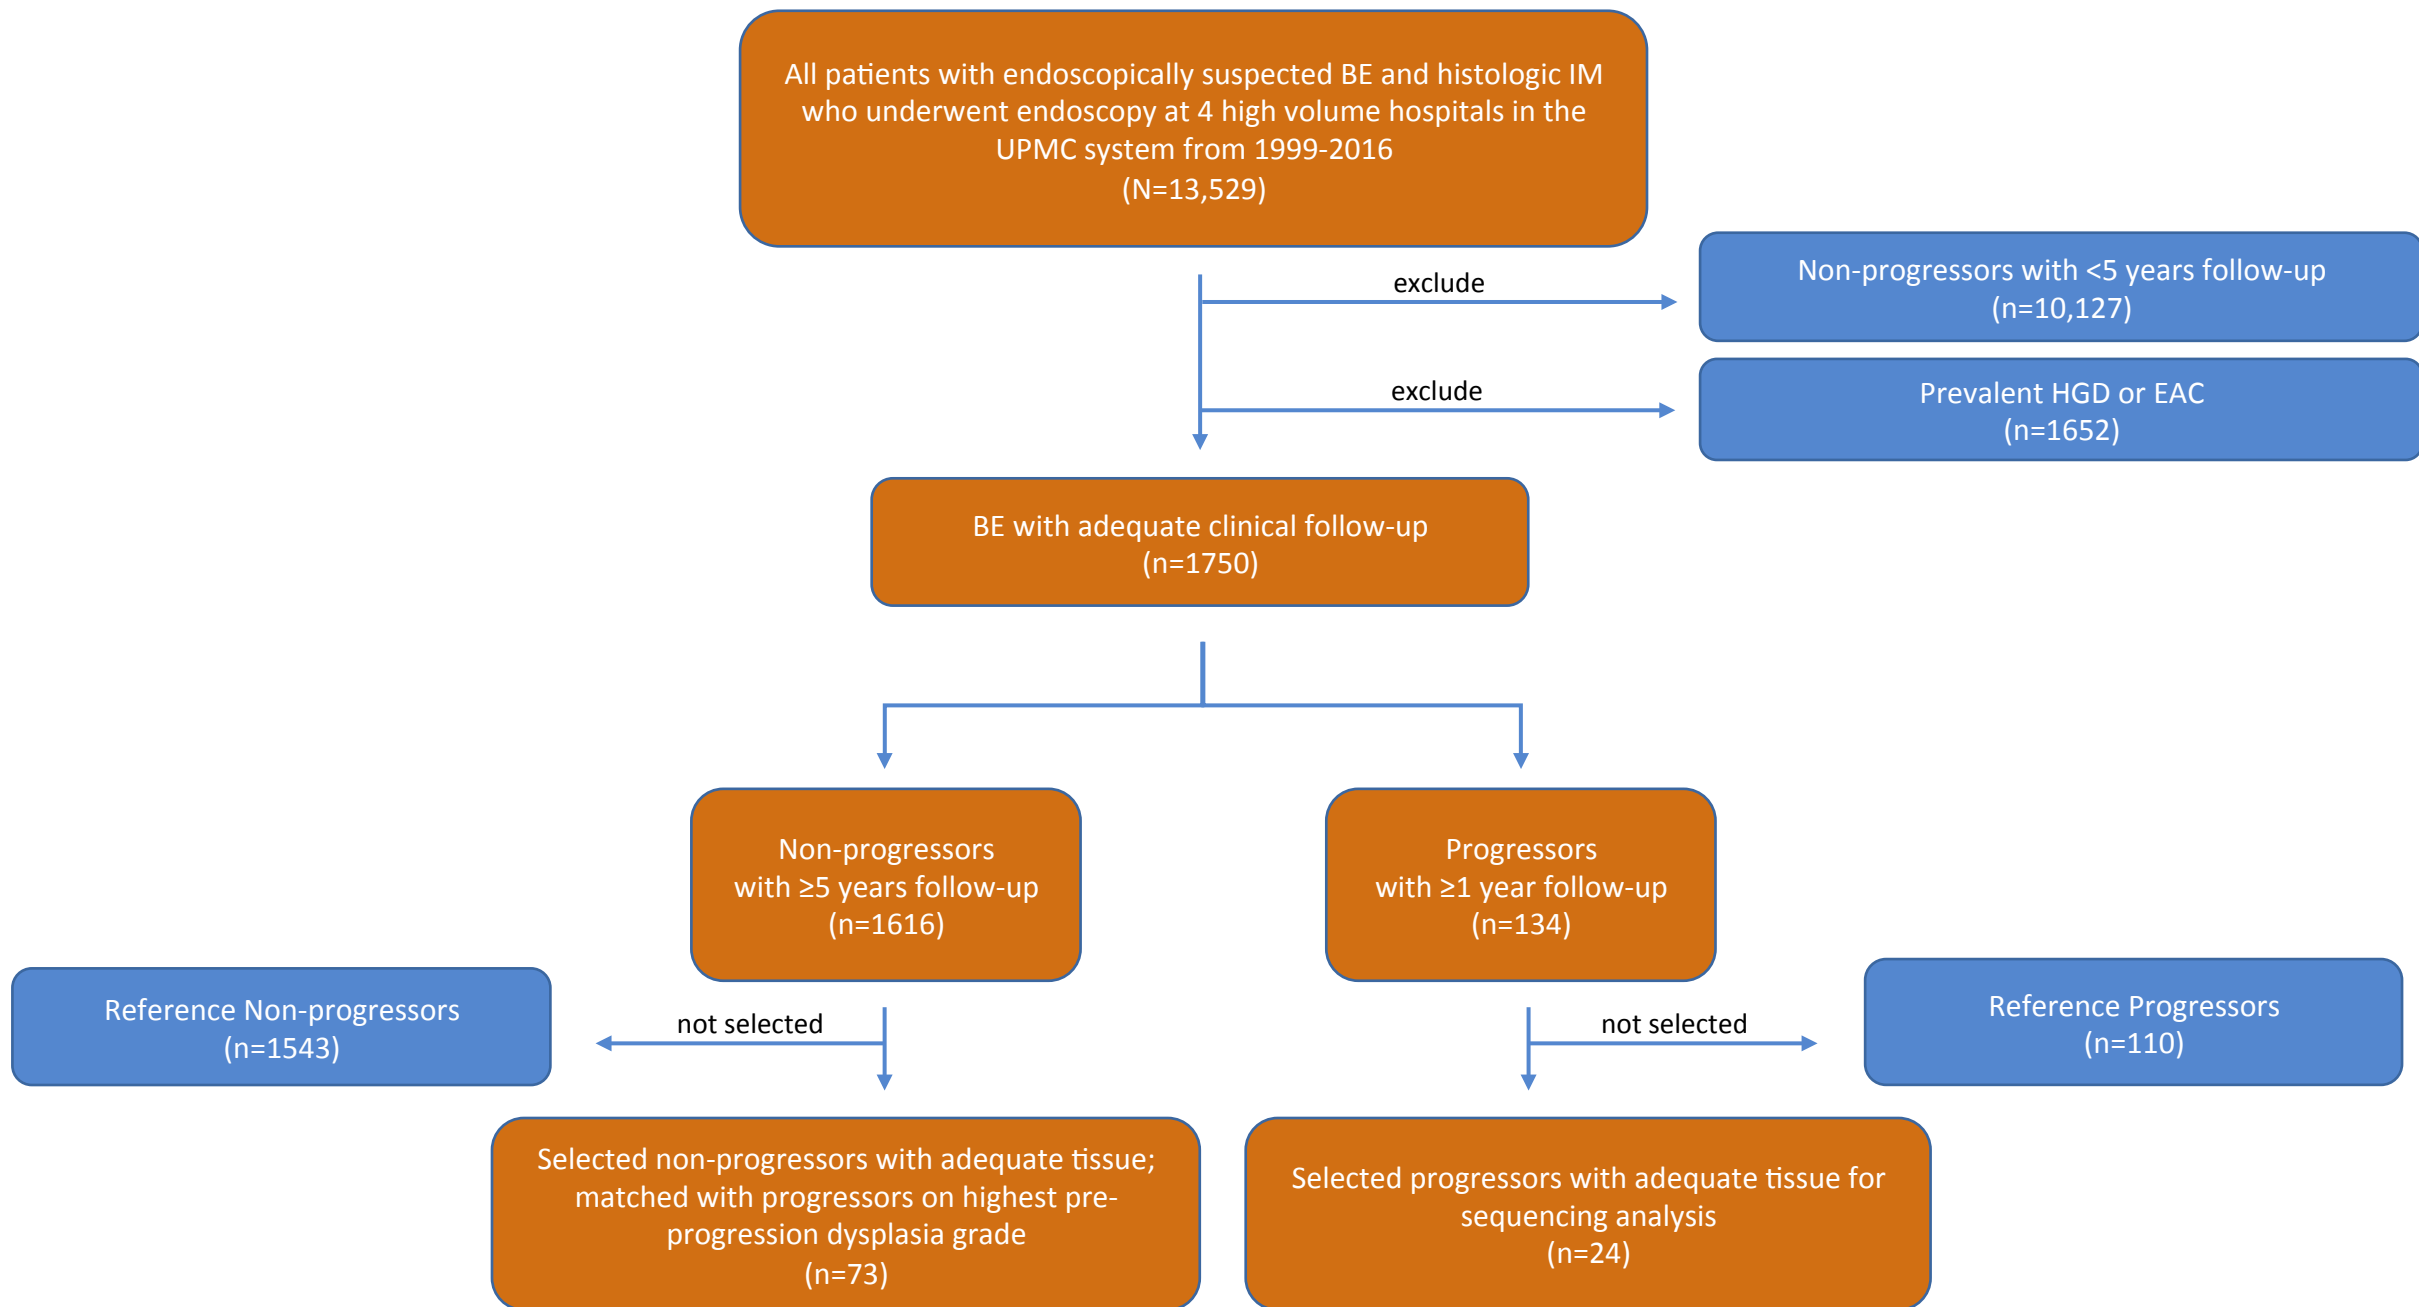

Supplementary Figure 1

Supplement: NIHMS957398-supplement-2.pdf [file NIHMS957398-supplement-2.pdf]

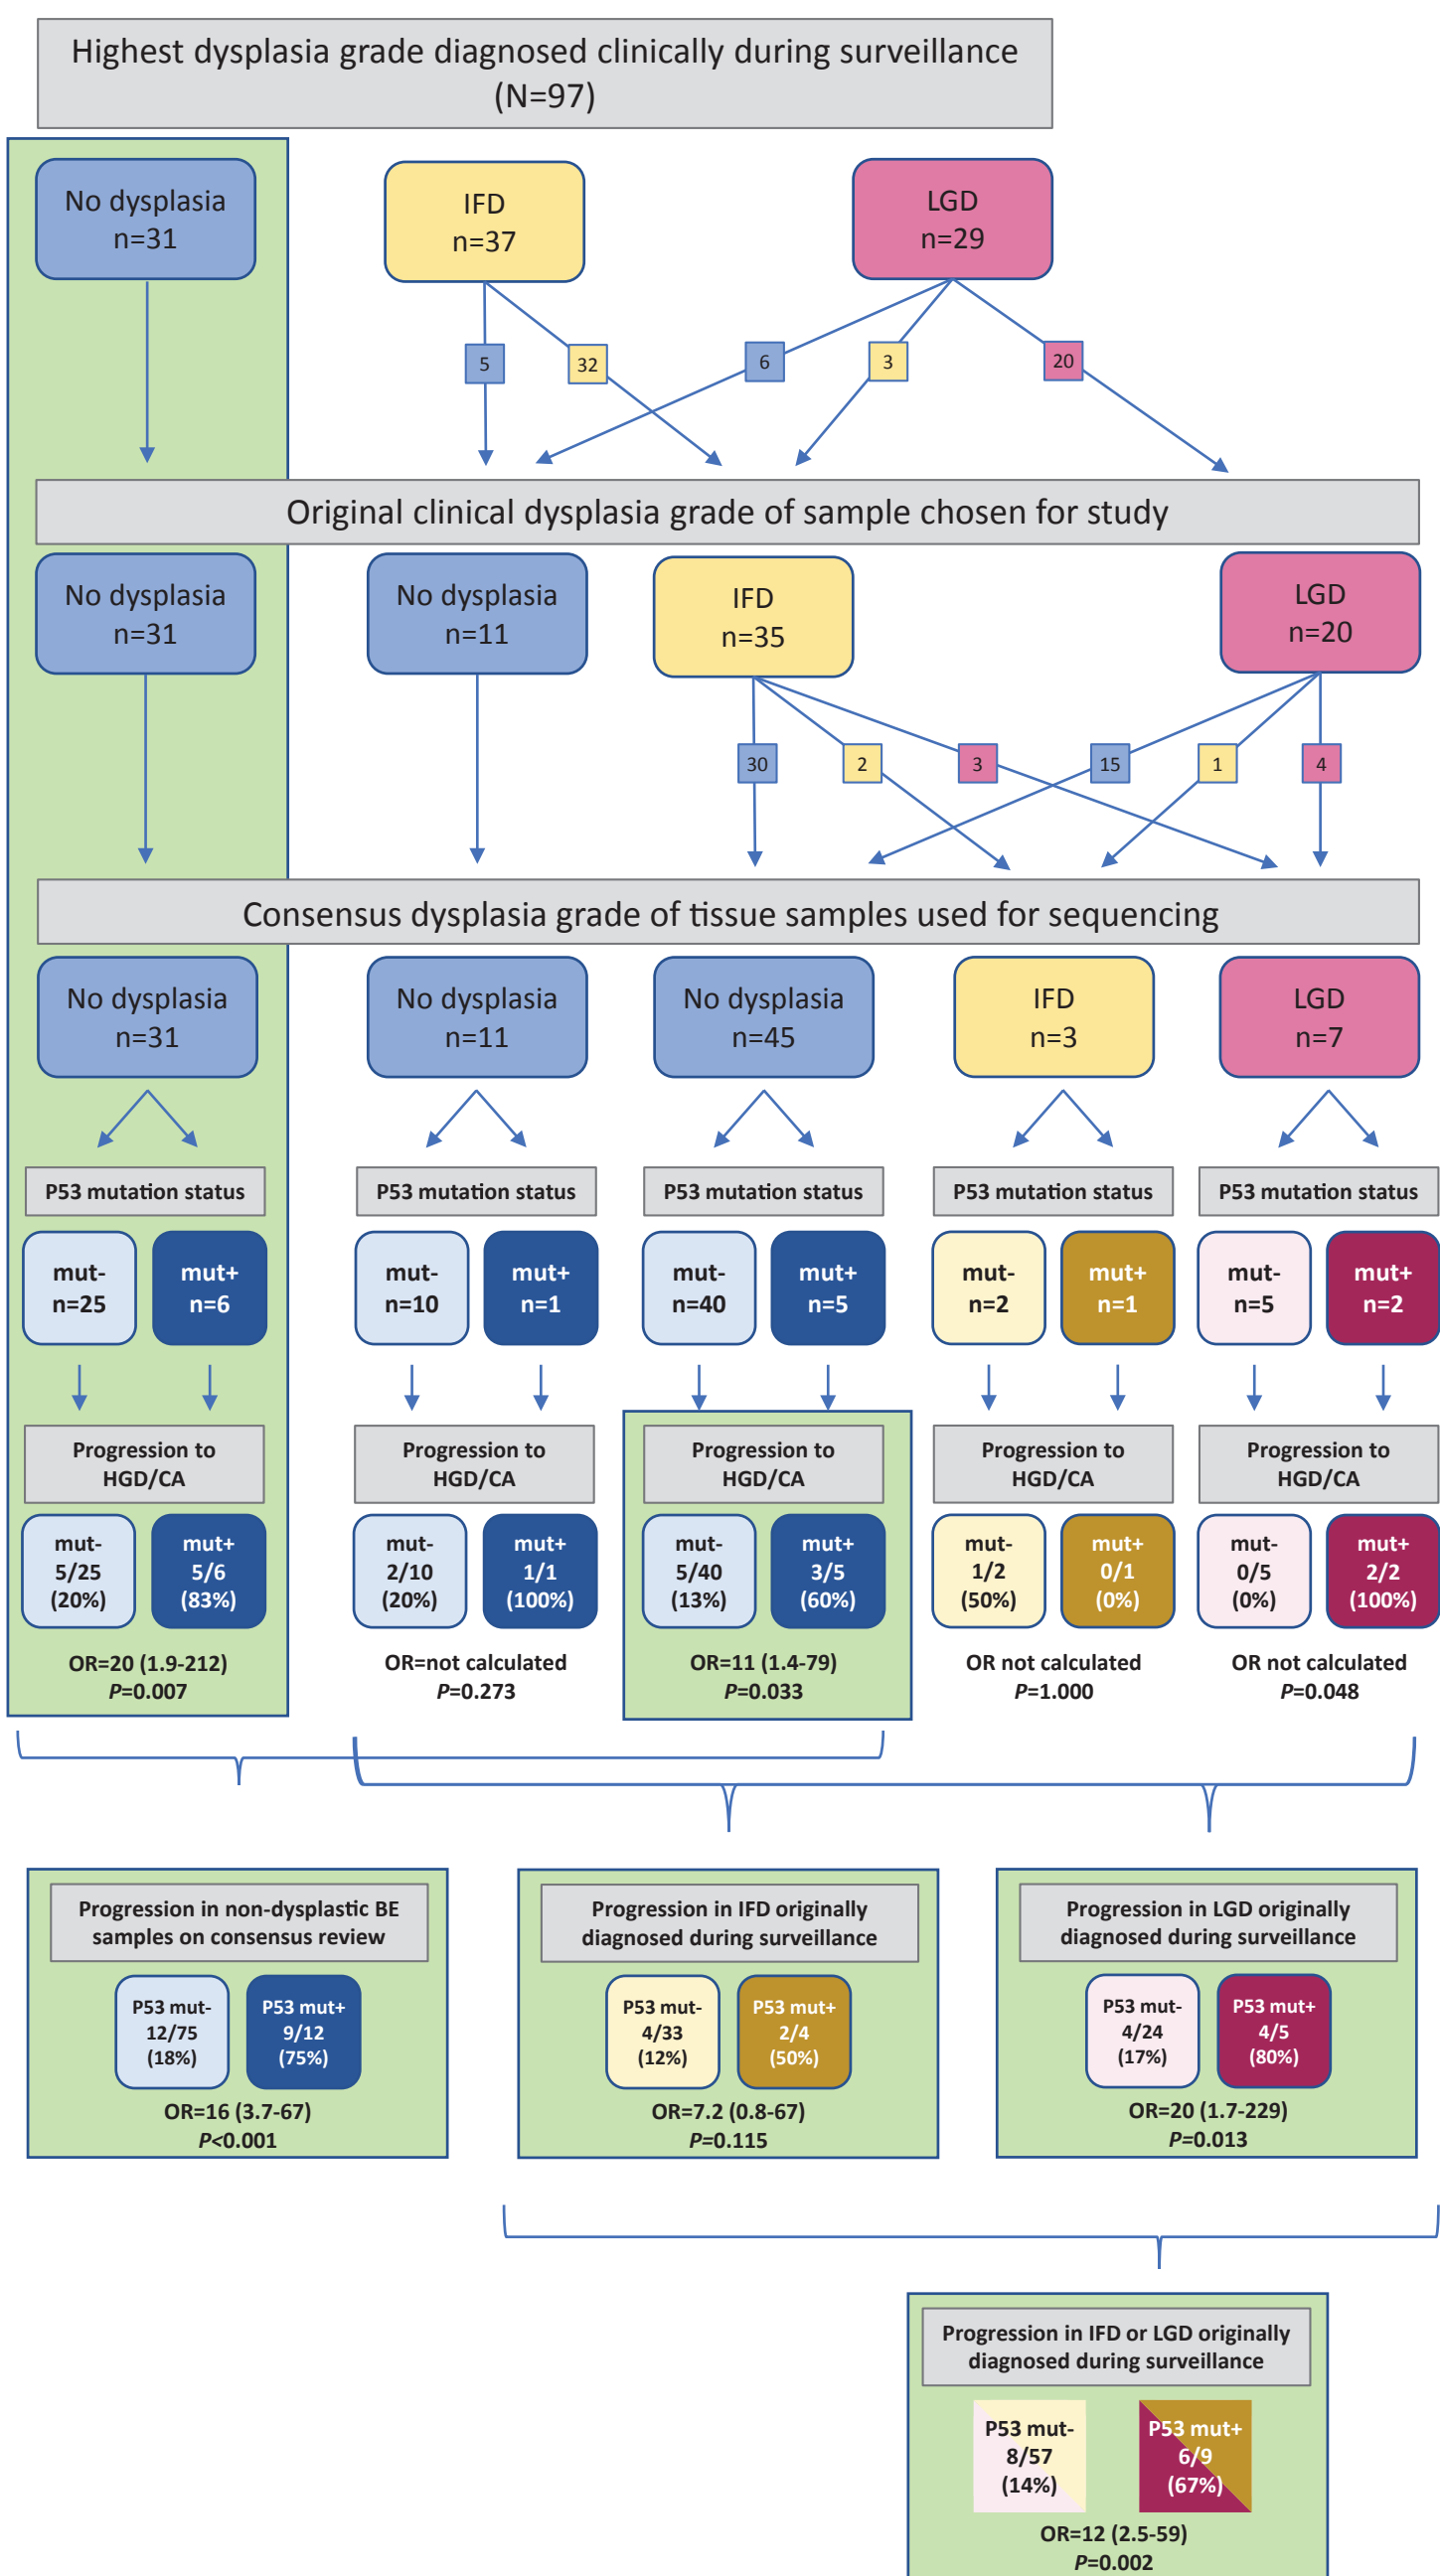

Supplementary Figure 2

Supplement: NIHMS957398-supplement-3.pdf [file NIHMS957398-supplement-3.pdf]

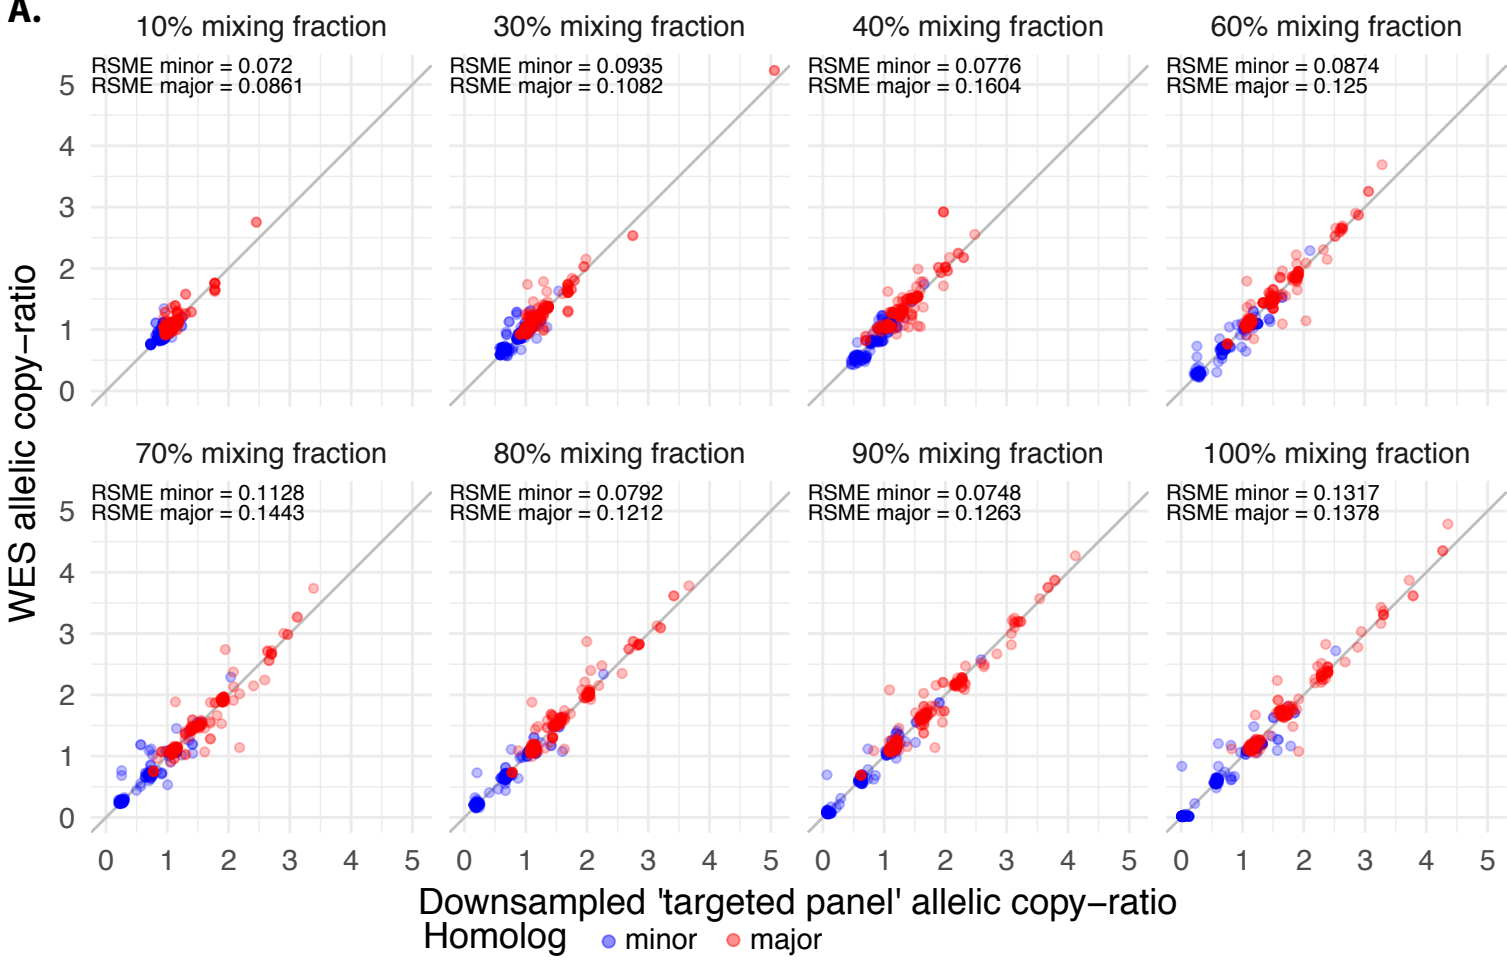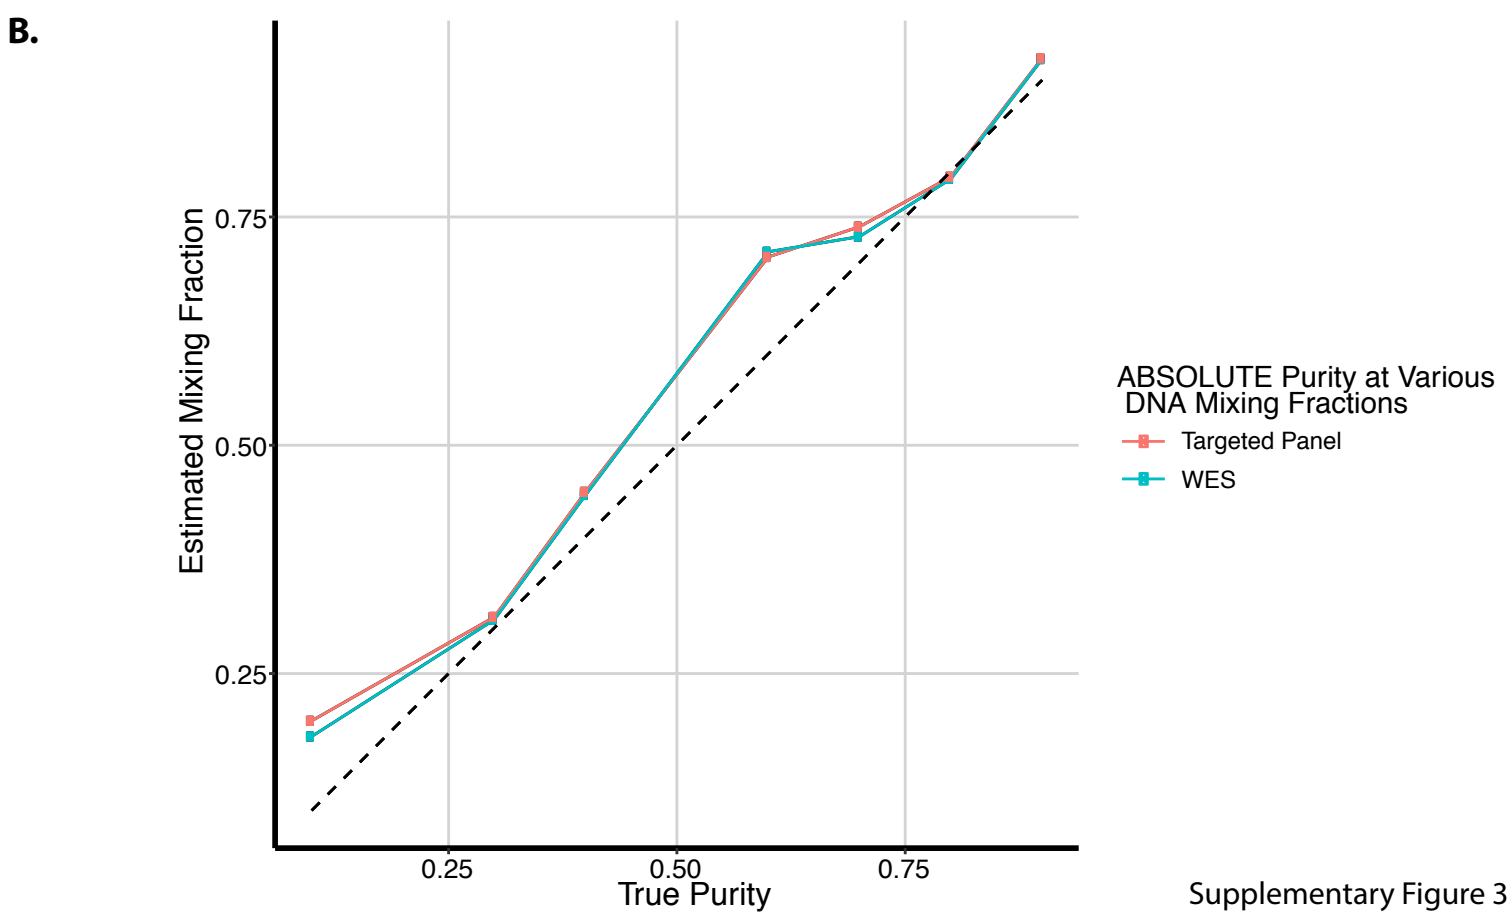

Supplementary Figure 3

Supplement: NIHMS957398-supplement-4.pdf [file NIHMS957398-supplement-4.pdf]

Supplementary Figure 3: Chromosomal arm level copy number heat map plot

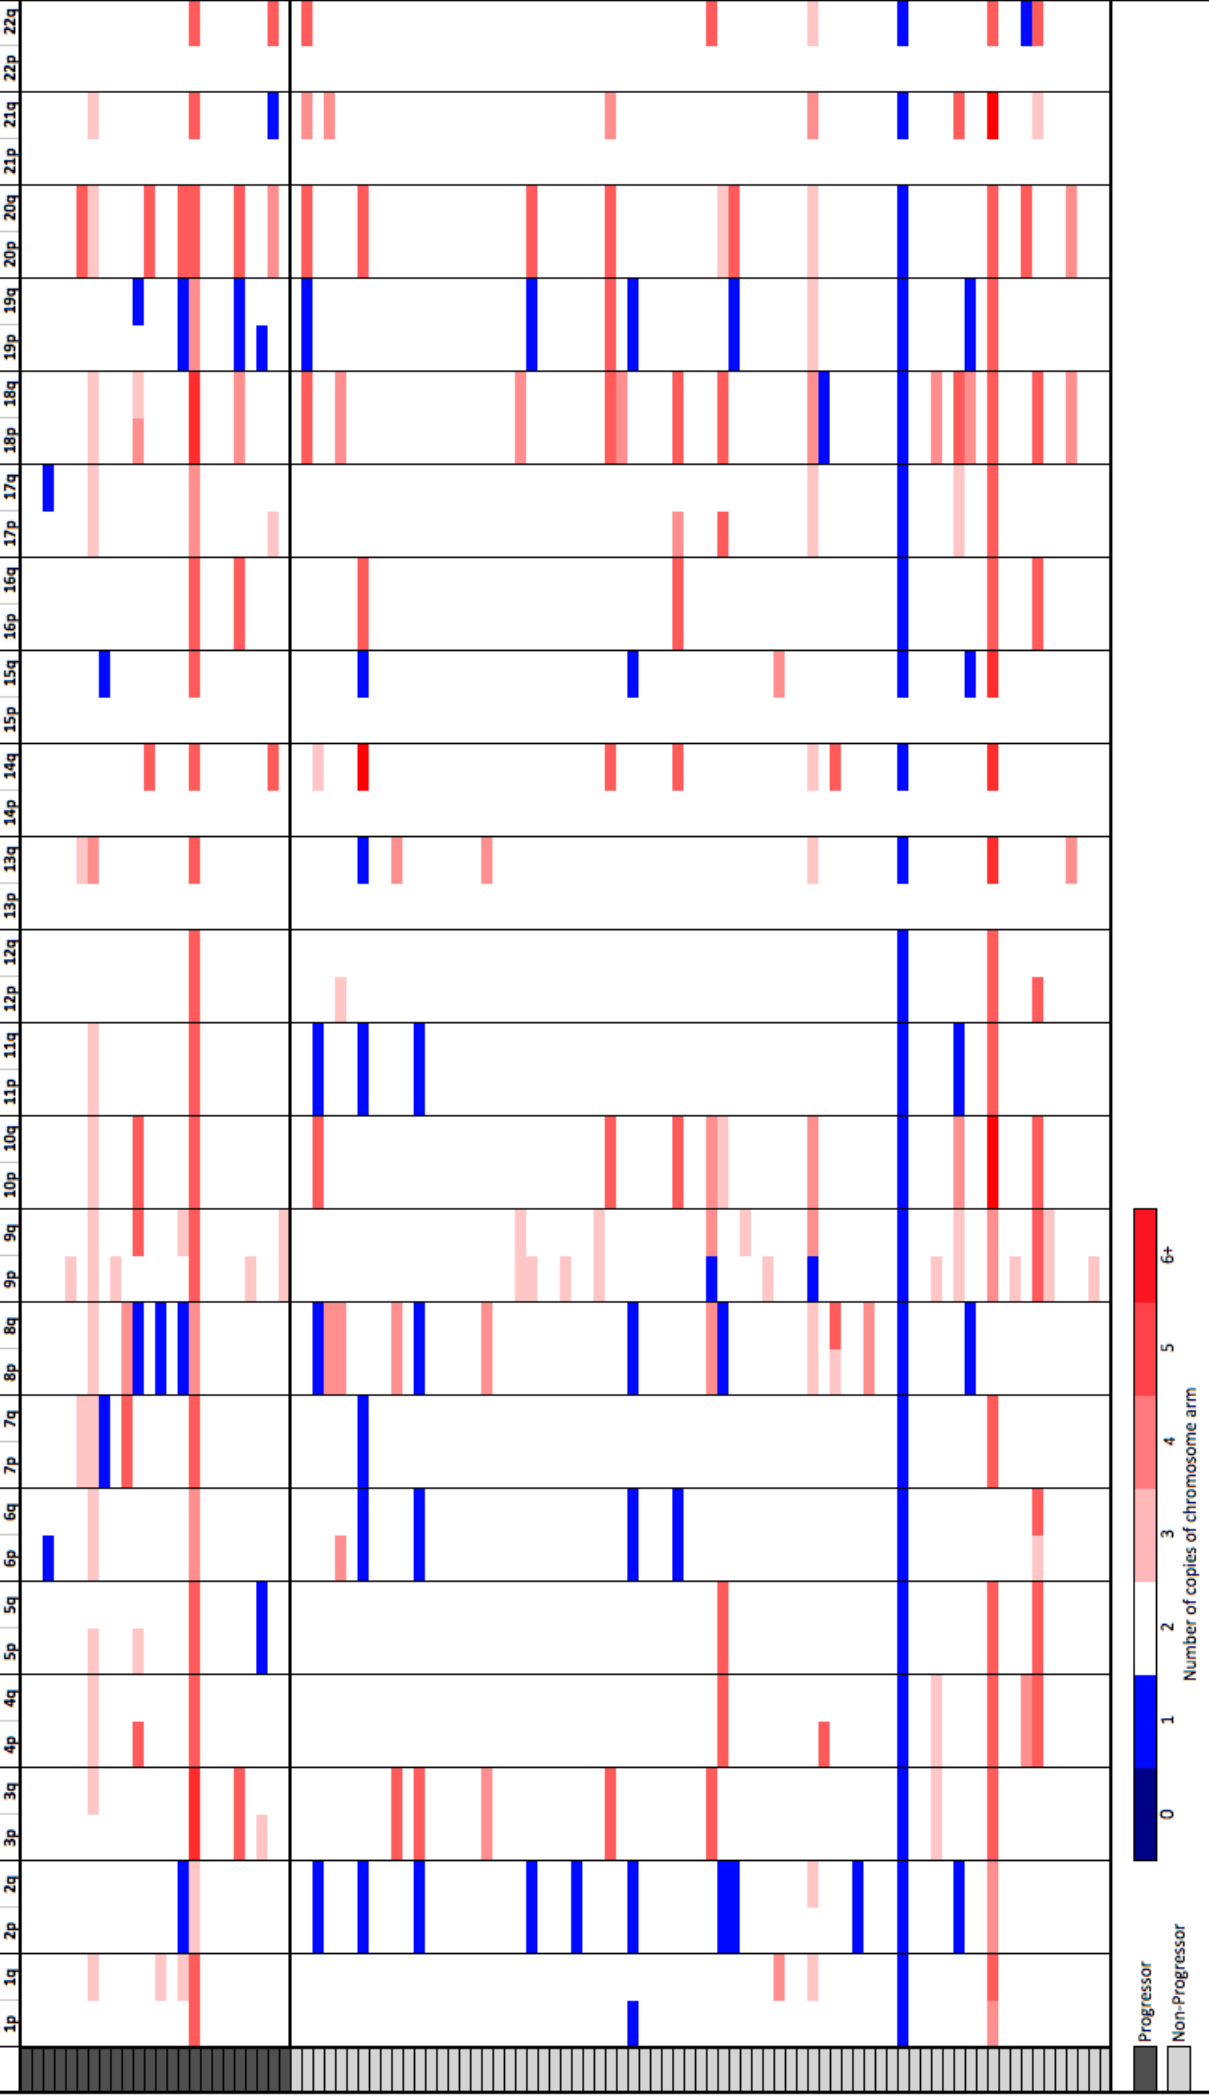

Supplement: NIHMS957398-supplement-5.pdf [file NIHMS957398-supplement-5.pdf]
